# Supplementary material for: Porcine intestinal innate lymphoid cells and lymphocyte spatial context revealed through single-cell RNA sequencing
Source: bioRxiv preprint, doi:10.1101/2022.01.09.475571, version 1 (2022-01-11)
Supplement: Wiarda_SupplementaryData02 [file 475571_file10.xlsx]

## Sheet: File_key
Supplementary Data 2. Differential gene expression and biological process enrichment results in porcine ileal CD4 ab T cells.
Sheet name	Sheet description
cluster_DGE	Results from differential gene expression analysis between cell clusters
topic_DGE	Results from differential gene expression analysis between cell topics
multidim_DGE	Results from differential gene expression analysis across multidimensional space
GO_results	Biological processes enriched in cell clusters, topics, or gene modules

## Sheet: cluster_DGE
gene	p_val	avg_logFC	pct.1	pct.2	p_val_adj	cluster
ENSSSCG00000031023	8.67763e-176	2.10942	0.586	0.101	1.11881e-171	12
FOS	5.40192e-65	1.31775	0.585	0.323	6.9647e-61	12
PDCD1	1.14499e-138	1.29874	0.718	0.315	1.47624e-134	12
RAE1	1.76896e-63	1.16682	0.631	0.363	2.28072e-59	12
CD69	1.07192e-99	1.14059	0.767	0.446	1.38203e-95	12
LTB	1.81536e-71	1.13883	0.64	0.342	2.34055e-67	12
ICA1	1.69999e-74	1.0769	0.32	0.062	2.1918e-70	12
ENSSSCG00000031912	3.97192e-83	1.06428	0.73	0.438	5.12099e-79	12
GYPC	2.84416e-63	0.96361	0.549	0.288	3.66697e-59	12
ENSSSCG00000029160	3.57265e-19	0.85686	0.383	0.251	4.60622e-15	12
SH2D1A	2.11449e-55	0.834274	0.555	0.301	2.72622e-51	12
CXCR4	3.93504e-46	0.797331	0.702	0.508	5.07345e-42	12
DUSP1	7.87483e-33	0.787133	0.431	0.242	1.0153e-28	12
ENSSSCG00000003236	1.32214e-41	0.767408	0.262	0.08	1.70463e-37	12
ATF3	1.55426e-32	0.753413	0.276	0.108	2.00391e-28	12
CD200	6.28222e-29	0.711589	0.13	0.023	8.09967e-25	12
ENSSSCG00000037885	2.12929e-87	0.691142	0.984	0.905	2.74529e-83	12
DHRS3	6.59537e-37	0.688046	0.402	0.199	8.50342e-33	12
TOX	3.82164e-36	0.687705	0.391	0.196	4.92724e-32	12
RBM38	1.44869e-31	0.67426	0.499	0.313	1.8678e-27	12
IL6R	8.12988e-30	0.671543	0.379	0.207	1.04818e-25	12
GPR174	3.18353e-32	0.658453	0.481	0.297	4.10453e-28	12
ENSSSCG00000036224	2.39699e-07	0.657687	0.37	0.282	0.00309044	12
VMP1	5.38858e-46	0.653272	0.76	0.579	6.94749e-42	12
PPP1R15A	9.13911e-31	0.644731	0.561	0.404	1.17831e-26	12
DARS	6.48381e-18	0.636265	0.292	0.173	8.35958e-14	12
DAPP1	3.24195e-29	0.63293	0.253	0.101	4.17985e-25	12
SAMD11	5.74708e-43	0.611688	0.124	0.006	7.40972e-39	12
TNF	1.27025e-23	0.606625	0.155	0.046	1.63773e-19	12
TRIB1	2.80806e-23	0.595335	0.289	0.146	3.62043e-19	12
ITM2A	2.99215e-18	0.588819	0.158	0.058	3.85778e-14	12
HINT1	1.16452e-44	0.587656	0.836	0.754	1.50142e-40	12
ENSSSCG00000037775	1.37333e-28	0.587115	0.701	0.556	1.77063e-24	12
ENSSSCG00000026140	1.73153e-25	0.571457	0.258	0.111	2.23246e-21	12
METTL8	3.93485e-20	0.566784	0.154	0.052	5.0732e-16	12
ITGB2	1.01837e-25	0.56437	0.432	0.275	1.31299e-21	12
GSPT2	3.77374e-14	0.562623	0.233	0.13	4.86549e-10	12
NCALD	4.67235e-22	0.560396	0.316	0.175	6.02406e-18	12
CXCR5	1.6968e-24	0.542097	0.177	0.058	2.18768e-20	12
ENSSSCG00000037602	3.34811e-17	0.541716	0.614	0.543	4.31672e-13	12
ENSSSCG00000015499	1.71277e-24	0.539232	0.347	0.189	2.20827e-20	12
TIGIT	1.67037e-19	0.532203	0.293	0.16	2.15361e-15	12
ENSSSCG00000014013	1.93549e-22	0.532034	0.306	0.16	2.49543e-18	12
SERHL2	1.29928e-17	0.528604	0.214	0.104	1.67516e-13	12
DNAJB1	4.00012e-09	0.508974	0.421	0.351	5.15735e-05	12
H3F3B	2.62426e-60	0.501299	0.997	0.995	3.38346e-56	12
RGCC	1.6942e-19	0.501126	0.563	0.415	2.18433e-15	12
HMGN3	2.44167e-19	0.499565	0.48	0.356	3.14804e-15	12
CD247	5.00759e-19	0.494197	0.666	0.597	6.45628e-15	12
SAT1	1.55869e-50	0.486311	0.983	0.958	2.00962e-46	12
CAPZA2	1.20972e-17	0.482245	0.49	0.388	1.5597e-13	12
SRGN	1.43579e-54	0.481726	0.993	0.988	1.85116e-50	12
IL6ST	3.55238e-20	0.476878	0.229	0.104	4.58008e-16	12
ENSSSCG00000006156	1.12935e-19	0.466874	0.201	0.085	1.45607e-15	12
BTG2	1.84322e-14	0.466521	0.443	0.334	2.37647e-10	12
FKBP5	9.48849e-12	0.465692	0.238	0.148	1.22335e-07	12
ENSSSCG00000004963	3.23362e-16	0.457021	0.39	0.279	4.1691e-12	12
PTPRCAP	2.18532e-47	0.456444	0.9	0.814	2.81754e-43	12
MAX	1.1574e-17	0.455516	0.514	0.405	1.49224e-13	12
CD9	4.64476e-17	0.452716	0.168	0.069	5.98848e-13	12
TCF7	2.62839e-19	0.452407	0.449	0.308	3.38879e-15	12
ID3	1.71792e-15	0.444765	0.205	0.099	2.21491e-11	12
BATF	3.45155e-06	0.440698	0.294	0.236	0.0445008	12
TRAM1	1.29782e-14	0.437475	0.463	0.371	1.67328e-10	12
LGMN	2.07493e-23	0.432335	0.623	0.473	2.67521e-19	12
CD8A	1.26411e-12	0.431921	0.266	0.164	1.62982e-08	12
ENSSSCG00000037081	2.37975e-31	0.430977	0.782	0.677	3.06821e-27	12
GADD45A	1.11674e-08	0.422876	0.234	0.161	0.000143981	12
DDIT4	5.07607e-11	0.422666	0.434	0.337	6.54458e-07	12
C1orf21	1.46368e-14	0.415394	0.191	0.092	1.88712e-10	12
TUBA4A	4.02842e-09	0.40614	0.396	0.323	5.19385e-05	12
INPP1	1.372e-14	0.394491	0.147	0.061	1.76891e-10	12
SEC62	2.88092e-11	0.394013	0.368	0.276	3.71438e-07	12
GAPDH	8.51445e-36	0.391299	0.941	0.87	1.09777e-31	12
AKR1B1	1.10307e-10	0.389623	0.185	0.105	1.42219e-06	12
RBM17	2.56069e-10	0.388695	0.263	0.177	3.30149e-06	12
GPX3	3.81655e-15	0.386552	0.104	0.031	4.92068e-11	12
CXCR6	3.35887e-09	0.384695	0.145	0.077	4.33059e-05	12
ZFP36	9.78214e-07	0.383644	0.322	0.26	0.0126121	12
PKIG	1.5204e-10	0.381649	0.109	0.046	1.96026e-06	12
COMMD3	2.61638e-09	0.381287	0.218	0.14	3.3733e-05	12
EIF1	9.14665e-44	0.376907	0.993	0.993	1.17928e-39	12
PRDX2	3.36298e-06	0.376546	0.25	0.19	0.0433589	12
LAG3	4.24546e-11	0.375756	0.363	0.26	5.47367e-07	12
IKZF3	5.06711e-11	0.374406	0.369	0.271	6.53302e-07	12
ENSSSCG00000028397	5.35261e-08	0.373263	0.384	0.324	0.000690111	12
ENSSSCG00000002259	9.49989e-10	0.372343	0.322	0.235	1.22482e-05	12
YWHAB	2.85091e-24	0.372131	0.742	0.639	3.67568e-20	12
RBM39	4.54259e-15	0.372097	0.569	0.476	5.85676e-11	12
SNRPN	4.30058e-08	0.369887	0.322	0.254	0.000554474	12
ZNRF1	2.63905e-09	0.369821	0.361	0.287	3.40253e-05	12
ENSSSCG00000006418	1.54617e-14	0.369479	0.517	0.423	1.99348e-10	12
GLIPR1	8.67918e-10	0.369105	0.299	0.211	1.11901e-05	12
HES1	1.98317e-08	0.368773	0.104	0.048	0.00025569	12
PEPD	5.53958e-07	0.368416	0.155	0.097	0.00714218	12
PNRC1	5.737e-19	0.366537	0.736	0.663	7.39672e-15	12
FUT8	3.96267e-07	0.365905	0.183	0.122	0.00510906	12
IRF3	1.40803e-08	0.365767	0.248	0.172	0.000181538	12
ENSSSCG00000034697	2.85998e-06	0.362376	0.254	0.195	0.0368738	12
GNG2	8.06157e-09	0.351733	0.527	0.485	0.000103938	12
LCK	9.89522e-21	0.346586	0.805	0.744	1.27579e-16	12
IKZF2	7.81767e-09	0.345986	0.212	0.134	0.000100793	12
TRA2B	9.04745e-14	0.343923	0.57	0.481	1.16649e-09	12
CD3G	1.31446e-27	0.342891	0.879	0.814	1.69474e-23	12
RAC2	3.96043e-36	0.340706	0.969	0.951	5.10618e-32	12
ENSSSCG00000026354	1.55314e-09	0.340019	0.204	0.124	2.00246e-05	12
HIF1A	2.92297e-08	0.339289	0.387	0.314	0.000376859	12
RAB27A	6.18622e-07	0.33864	0.353	0.294	0.00797589	12
BTG1	1.53722e-18	0.335812	0.974	0.974	1.98194e-14	12
CDC42SE2	1.52928e-07	0.335149	0.266	0.194	0.0019717	12
PTPN18	3.21206e-15	0.334851	0.581	0.484	4.14131e-11	12
ATF4	3.23377e-11	0.331927	0.671	0.62	4.1693e-07	12
ENSSSCG00000040118	4.74822e-12	0.331463	0.592	0.536	6.12188e-08	12
POU2AF1	1.37491e-08	0.329434	0.126	0.066	0.000177268	12
EIF1B	1.80822e-08	0.329309	0.446	0.388	0.000233134	12
TNFSF8	1.30994e-08	0.328524	0.111	0.053	0.000168891	12
SOD1	8.59256e-15	0.32851	0.621	0.535	1.10784e-10	12
SLC25A5	3.76428e-09	0.327231	0.531	0.465	4.85329e-05	12
OCIAD1	3.55451e-08	0.326936	0.417	0.352	0.000458283	12
TNFAIP8	1.70781e-12	0.324803	0.553	0.457	2.20188e-08	12
LYSMD2	2.20159e-07	0.321497	0.131	0.074	0.00283851	12
ZC3H12D	9.42423e-09	0.320602	0.191	0.117	0.000121507	12
LAT	3.56372e-11	0.318303	0.647	0.595	4.5947e-07	12
ACTB	6.23153e-20	0.31812	0.977	0.935	8.03432e-16	12
HIKESHI	3.87388e-09	0.316937	0.436	0.362	4.99459e-05	12
TENT5C	1.92325e-06	0.316375	0.21	0.148	0.0247965	12
ZFP36L1	4.13044e-11	0.315102	0.715	0.652	5.32538e-07	12
PHACTR2	7.65227e-09	0.315065	0.195	0.119	9.86607e-05	12
ENSSSCG00000014850	2.16884e-09	0.314004	0.48	0.415	2.79629e-05	12
LY9	1.09868e-08	0.313091	0.145	0.079	0.000141652	12
CCND3	4.11165e-07	0.310816	0.329	0.267	0.00530116	12
EIF4A2	4.42585e-26	0.308783	0.885	0.825	5.70625e-22	12
ENSSSCG00000038351	7.4999e-08	0.307348	0.474	0.4	0.000966963	12
SRSF7	1.36708e-07	0.306669	0.482	0.425	0.00176258	12
RSRC2	1.26557e-08	0.303011	0.546	0.497	0.000163169	12
UGCG	1.25157e-06	0.301593	0.217	0.15	0.0161365	12
TMEM134	9.82234e-07	0.301144	0.201	0.138	0.0126639	12
ARRDC3	2.13821e-07	0.300713	0.145	0.084	0.00275679	12
PHLDA2	4.88e-09	0.299706	0.105	0.047	6.29179e-05	12
EZR	1.83662e-06	0.299191	0.499	0.455	0.0236795	12
RNF19A	1.16528e-08	0.298496	0.485	0.407	0.00015024	12
TRPS1	3.26975e-07	0.29841	0.172	0.109	0.00421569	12
DNAJA1	1.25612e-10	0.296872	0.679	0.613	1.61951e-06	12
ARF6	1.44151e-12	0.296726	0.699	0.657	1.85854e-08	12
DNAJB4	8.32761e-08	0.296401	0.125	0.067	0.00107368	12
NDFIP1	1.03182e-08	0.292794	0.586	0.556	0.000133032	12
RSBN1L	3.59138e-06	0.291622	0.231	0.17	0.0463037	12
ENSSSCG00000005481	1.57312e-07	0.291349	0.115	0.06	0.00202822	12
UMAD1	6.9399e-07	0.290983	0.13	0.074	0.00894761	12
RAB11A	2.45388e-06	0.290668	0.265	0.204	0.0316379	12
PKM	2.67901e-11	0.289498	0.617	0.543	3.45404e-07	12
PTPRC	9.11488e-23	0.280913	0.914	0.876	1.17518e-18	12
HSPB1	5.00838e-11	0.279677	0.796	0.768	6.45731e-07	12
NAB1	1.09218e-06	0.279462	0.115	0.063	0.0140814	12
PNISR	5.03441e-10	0.277348	0.538	0.461	6.49086e-06	12
DGKZ	3.25285e-06	0.274511	0.134	0.082	0.0419389	12
RHOA	2.32194e-07	0.270651	0.503	0.463	0.00299367	12
HSPA8	3.43686e-12	0.269585	0.897	0.899	4.43114e-08	12
SH3BGRL3	4.75624e-16	0.264457	0.892	0.88	6.13222e-12	12
LY96	6.58381e-07	0.26345	0.386	0.316	0.0084885	12
RIN3	4.26105e-07	0.260369	0.11	0.058	0.00549377	12
PFN1	2.78058e-12	0.260087	0.838	0.792	3.58501e-08	12
EXOC6	2.70142e-06	0.259986	0.12	0.07	0.0348294	12
ENSSSCG00000003691	9.58557e-14	0.256555	0.865	0.847	1.23587e-09	12
NAP1L1	1.18213e-08	0.254277	0.698	0.68	0.000152413	12
TRAF3IP3	2.1776e-06	0.254226	0.466	0.415	0.0280758	12
ENSSSCG00000032556	1.63307e-06	0.2524	0.725	0.741	0.0210551	12
CSRP1	5.71982e-14	-0.250157	0.044	0.14	7.37457e-10	12
RACK1	1.1233e-23	-0.250672	0.866	0.935	1.44827e-19	12
LMO4	3.28813e-11	-0.253254	0.117	0.227	4.23938e-07	12
SLC11A2	5.37735e-10	-0.258863	0.118	0.221	6.93302e-06	12
NKG7	1.86534e-13	-0.261206	0.132	0.265	2.40499e-09	12
RPL10	1.65452e-46	-0.263687	0.999	0.999	2.13318e-42	12
FLT3LG	7.89317e-11	-0.263694	0.083	0.18	1.01767e-06	12
SERPINB1	8.43647e-12	-0.265879	0.048	0.135	1.08771e-07	12
RPIA	1.68272e-11	-0.265956	0.111	0.223	2.16953e-07	12
ND1	1.14775e-17	-0.26785	0.843	0.912	1.47979e-13	12
PLAGL2	4.50331e-12	-0.27162	0.061	0.155	5.80611e-08	12
ENSSSCG00000036892	8.95799e-10	-0.271874	0.083	0.171	1.15495e-05	12
CD63	4.5688e-11	-0.27289	0.332	0.485	5.89055e-07	12
RPL23	3.42917e-54	-0.274747	1	1	4.42123e-50	12
CAB39L	7.24312e-13	-0.274932	0.084	0.193	9.33856e-09	12
UBE2L6	2.83204e-14	-0.276203	0.268	0.439	3.65135e-10	12
OSTF1	5.09707e-14	-0.276465	0.353	0.532	6.57166e-10	12
ENSSSCG00000036114	4.42724e-11	-0.27863	0.393	0.525	5.70804e-07	12
ENSSSCG00000004970	2.20477e-72	-0.279744	1	1	2.84261e-68	12
ENSSSCG00000034448	1.23207e-52	-0.279906	1	1	1.5885e-48	12
HERC5	3.76682e-14	-0.281115	0.027	0.114	4.85656e-10	12
ENSSSCG00000006380	2.34742e-13	-0.282889	0.167	0.305	3.02653e-09	12
CTSB	3.44453e-12	-0.28306	0.198	0.339	4.44104e-08	12
ARL6IP1	7.47254e-08	-0.283139	0.397	0.522	0.000963435	12
AOAH	8.9544e-14	-0.286508	0.026	0.11	1.15449e-09	12
SERPINB9	3.68003e-14	-0.288809	0.063	0.17	4.74466e-10	12
CD5	8.846e-16	-0.28924	0.439	0.619	1.14052e-11	12
PARP12	6.18389e-14	-0.289585	0.061	0.166	7.97289e-10	12
RAB12	1.51835e-13	-0.290208	0.045	0.139	1.95761e-09	12
PDE4D	1.04299e-11	-0.292928	0.108	0.219	1.34473e-07	12
PNP	3.72866e-13	-0.294916	0.062	0.163	4.80736e-09	12
ENSSSCG00000029596	4.37168e-11	-0.29807	0.124	0.234	5.6364e-07	12
BCL2L11	1.85372e-15	-0.305522	0.055	0.164	2.39e-11	12
ENSSSCG00000039460	4.91615e-41	-0.306884	0.957	0.986	6.33839e-37	12
ENSSSCG00000006395	3.83975e-17	-0.312252	0.361	0.549	4.95059e-13	12
ENSSSCG00000039658	4.32377e-18	-0.314389	0.231	0.414	5.57464e-14	12
ENSSSCG00000004945	2.79273e-31	-0.31786	0.804	0.913	3.60067e-27	12
GPR34	4.6259e-16	-0.318152	0.017	0.104	5.96417e-12	12
PLAC8	1.48616e-19	-0.324782	0.467	0.676	1.91611e-15	12
FBXO39	2.66824e-14	-0.328322	0.064	0.171	3.44016e-10	12
ELL2	6.91933e-16	-0.33075	0.046	0.154	8.9211e-12	12
ISG15	3.02576e-10	-0.331158	0.602	0.729	3.90111e-06	12
CD99	1.80879e-14	-0.334424	0.279	0.447	2.33207e-10	12
FKBP11	5.18796e-18	-0.335044	0.346	0.539	6.68883e-14	12
ATP2B1	4.14604e-15	-0.335581	0.103	0.232	5.34548e-11	12
DUT	6.43193e-07	-0.338663	0.214	0.3	0.00829269	12
RPSA	3.41284e-56	-0.339949	0.983	0.997	4.40018e-52	12
ENSSSCG00000024696	1.34191e-17	-0.340328	0.031	0.135	1.73012e-13	12
NFKBIB	1.00706e-15	-0.341397	0.299	0.478	1.2984e-11	12
CCR7	3.32894e-13	-0.345281	0.095	0.209	4.292e-09	12
CRTAM	1.37149e-12	-0.349559	0.084	0.19	1.76826e-08	12
MOB3A	1.68685e-15	-0.350865	0.107	0.237	2.17485e-11	12
RUNX3	1.43766e-18	-0.353888	0.026	0.132	1.85357e-14	12
NAF1	4.46024e-17	-0.356945	0.109	0.254	5.75059e-13	12
DYNLT1	5.06995e-19	-0.364953	0.05	0.175	6.53669e-15	12
ISG20	3.6918e-15	-0.365167	0.176	0.325	4.75984e-11	12
SCML4	1.00369e-14	-0.367366	0.068	0.179	1.29405e-10	12
ENSSSCG00000033697	2.77383e-48	-0.367691	0.921	0.967	3.5763e-44	12
IL10	7.73759e-20	-0.37308	0.12	0.283	9.97607e-16	12
RALA	9.45153e-19	-0.374516	0.155	0.323	1.21859e-14	12
PIM1	3.5354e-17	-0.374933	0.075	0.202	4.55819e-13	12
S1PR1	1.13482e-15	-0.37833	0.068	0.183	1.46313e-11	12
CTSW	1.61282e-09	-0.384517	0.112	0.204	2.0794e-05	12
GPX1	7.60327e-15	-0.388458	0.264	0.419	9.8029e-11	12
FURIN	2.35653e-16	-0.390196	0.048	0.156	3.03827e-12	12
LAPTM5	2.23254e-35	-0.395178	0.814	0.933	2.87841e-31	12
SMIM3	6.46398e-15	-0.398024	0.044	0.143	8.33401e-11	12
ENSSSCG00000016758	2.39322e-33	-0.398837	0.731	0.903	3.08558e-29	12
ITGB7	1.07771e-22	-0.399846	0.084	0.244	1.38949e-18	12
RPLP0	3.5239e-81	-0.399886	0.991	0.999	4.54336e-77	12
GPX4	6.17782e-26	-0.40599	0.482	0.698	7.96506e-22	12
ENSSSCG00000011234	1.10883e-21	-0.407594	0.108	0.276	1.42961e-17	12
ZFP36L2	3.9027e-34	-0.414026	0.736	0.901	5.03176e-30	12
RORA	7.78362e-21	-0.42246	0.154	0.33	1.00354e-16	12
TNFRSF1B	1.50738e-32	-0.42439	0.26	0.528	1.94346e-28	12
ENSSSCG00000012119	3.16556e-92	-0.424818	0.999	1	4.08135e-88	12
ENSSSCG00000015447	4.40656e-18	-0.426978	0.086	0.223	5.68138e-14	12
BST2	2.16579e-18	-0.42873	0.312	0.5	2.79235e-14	12
UBALD2	6.62609e-26	-0.434197	0.108	0.299	8.54302e-22	12
ENSSSCG00000016903	6.35807e-17	-0.436685	0.095	0.224	8.19747e-13	12
PIK3R1	9.37412e-17	-0.43984	0.204	0.364	1.20861e-12	12
PMAIP1	1.85049e-24	-0.465881	0.103	0.278	2.38583e-20	12
IL18R1	1.066e-19	-0.466873	0.083	0.224	1.3744e-15	12
TRAT1	1.17682e-29	-0.47523	0.218	0.458	1.51728e-25	12
TNFAIP3	3.13111e-25	-0.482143	0.302	0.522	4.03695e-21	12
CTSC	1.26828e-39	-0.49367	0.726	0.88	1.63519e-35	12
UBL3	6.98026e-26	-0.500137	0.217	0.427	8.99966e-22	12
CXCR3	5.70726e-27	-0.509313	0.048	0.207	7.35837e-23	12
EMB	1.07158e-27	-0.510394	0.217	0.44	1.38158e-23	12
PDE4B	1.25259e-29	-0.524152	0.1	0.295	1.61497e-25	12
ENSSSCG00000006919	1.50107e-35	-0.552313	0.087	0.307	1.93533e-31	12
GPR171	3.87251e-29	-0.555935	0.035	0.193	4.99283e-25	12
TIMP1	3.56367e-11	-0.568366	0.176	0.293	4.59464e-07	12
IL4R	3.00101e-34	-0.596598	0.065	0.267	3.8692e-30	12
ENSSSCG00000033734	2.32479e-18	-0.633329	0.583	0.638	2.99735e-14	12
CCR9	1.03223e-34	-0.640874	0.045	0.233	1.33085e-30	12
IFNGR1	2.78187e-38	-0.658497	0.094	0.323	3.58667e-34	12
PCLAF	1.10481e-12	-0.66083	0.062	0.154	1.42443e-08	12
HMGB2	3.89599e-27	-0.663373	0.543	0.722	5.0231e-23	12
IFI6	7.43202e-51	-0.708139	0.828	0.927	9.58211e-47	12
GLIPR2	3.9009e-50	-0.738574	0.074	0.337	5.02943e-46	12
C15orf48	1.14253e-33	-0.75733	0.109	0.322	1.47306e-29	12
IFITM3	9.54632e-66	-0.761121	0.499	0.793	1.23081e-61	12
ENSSSCG00000024973	2.05501e-62	-0.806	0.206	0.544	2.64953e-58	12
IL7R	6.43593e-44	-0.826205	0.037	0.258	8.29784e-40	12
GPR183	4.66605e-86	-0.855315	0.24	0.67	6.01593e-82	12
CD52	4.20809e-117	-1.35297	0.329	0.766	5.42549e-113	12
ENSSSCG00000036618	1.8652e-180	-1.93815	0.249	0.788	2.4048e-176	12
ENSSSCG00000036618	7.89159e-269	1.59772	0.982	0.445	1.01746e-264	15
CD52	7.89203e-203	1.42677	0.95	0.477	1.01752e-198	15
IL7R	5.8538e-62	0.838508	0.371	0.103	7.54731e-58	15
ENSSSCG00000033734	2.79194e-47	0.838431	0.703	0.585	3.59965e-43	15
IFI6	9.96318e-93	0.786945	0.985	0.855	1.28455e-88	15
IFITM3	9.8989e-78	0.724126	0.866	0.62	1.27627e-73	15
GLIPR2	2.2499e-41	0.680133	0.408	0.179	2.9008e-37	15
PIK3R1	3.70536e-44	0.673924	0.492	0.232	4.77732e-40	15
C15orf48	3.29339e-30	0.664556	0.39	0.189	4.24617e-26	15
TRAT1	3.29493e-41	0.607733	0.557	0.3	4.24815e-37	15
CCR9	9.86686e-33	0.592121	0.297	0.115	1.27213e-28	15
ENSSSCG00000024973	3.36259e-44	0.579015	0.611	0.352	4.33538e-40	15
ENSSSCG00000006919	8.1758e-37	0.576607	0.385	0.168	1.05411e-32	15
SMIM3	5.20632e-24	0.556394	0.2	0.071	6.7125e-20	15
IFNGR1	6.03543e-30	0.555377	0.383	0.186	7.78149e-26	15
LAPTM5	1.66973e-79	0.551323	0.973	0.858	2.15279e-75	15
UBL3	9.28899e-30	0.541452	0.5	0.294	1.19763e-25	15
GPR171	9.78781e-27	0.510235	0.247	0.093	1.26194e-22	15
EMB	9.62481e-23	0.480868	0.489	0.312	1.24093e-18	15
CTSW	7.17018e-12	0.476298	0.246	0.142	9.24451e-08	15
PMAIP1	5.75319e-22	0.472868	0.33	0.17	7.41759e-18	15
GPR183	2.01995e-34	0.466332	0.696	0.45	2.60432e-30	15
IL4R	1.94935e-21	0.464931	0.307	0.152	2.51329e-17	15
CXCR3	8.84711e-18	0.457572	0.241	0.115	1.14066e-13	15
UBALD2	4.02915e-19	0.435682	0.342	0.188	5.19479e-15	15
CD99	1.80281e-16	0.426705	0.494	0.346	2.32436e-12	15
ENSSSCG00000011234	5.65065e-19	0.415816	0.327	0.174	7.28538e-15	15
IL18R1	4.66815e-11	0.413528	0.245	0.147	6.01864e-07	15
FBXO39	2.58361e-17	0.408915	0.218	0.1	3.33105e-13	15
LAX1	1.82174e-15	0.39768	0.408	0.269	2.34877e-11	15
ENSSSCG00000024696	8.77599e-19	0.393082	0.177	0.067	1.13149e-14	15
FKBP11	3.65652e-22	0.392702	0.593	0.423	4.71435e-18	15
ENSSSCG00000012119	1.51634e-103	0.390733	1	0.999	1.95502e-99	15
ENSSSCG00000008898	6.24379e-09	0.383634	0.177	0.1	8.05011e-05	15
ITGB7	3.78539e-14	0.381689	0.272	0.155	4.8805e-10	15
DYNLT1	4.36998e-11	0.380897	0.194	0.106	5.63422e-07	15
GPX1	3.81951e-11	0.378549	0.449	0.331	4.9245e-07	15
SCML4	3.27477e-18	0.378481	0.231	0.103	4.22216e-14	15
RALA	6.57303e-11	0.375814	0.339	0.234	8.4746e-07	15
PLAC8	1.73294e-21	0.37414	0.718	0.556	2.23428e-17	15
ENSSSCG00000014909	2.6526e-20	0.368324	0.117	0.029	3.41999e-16	15
CD63	8.98778e-13	0.365838	0.519	0.396	1.15879e-08	15
MOB3A	9.64187e-13	0.365751	0.272	0.159	1.24313e-08	15
RUNX3	2.63359e-16	0.364014	0.166	0.066	3.39548e-12	15
PNRC2	2.59276e-12	0.361668	0.54	0.416	3.34285e-08	15
PDE4B	8.51467e-13	0.359274	0.312	0.193	1.0978e-08	15
TNFAIP3	9.60362e-14	0.35557	0.545	0.406	1.23819e-09	15
RPLP0	2.1307e-68	0.353238	1	0.995	2.74711e-64	15
MX2	3.21178e-11	0.348863	0.193	0.099	4.14094e-07	15
ENSSSCG00000016902	1.043e-19	0.346404	0.292	0.146	1.34475e-15	15
ENSSSCG00000016758	1.07898e-26	0.341046	0.918	0.813	1.39113e-22	15
PARP12	9.75166e-14	0.331599	0.204	0.099	1.25728e-09	15
CTSC	6.3649e-22	0.326467	0.893	0.8	8.20627e-18	15
NKG7	1.3322e-15	0.320559	0.319	0.178	1.7176e-11	15
ENSSSCG00000029596	2.19936e-10	0.317865	0.269	0.166	2.83563e-06	15
ENSSSCG00000034448	4.54736e-76	0.317283	1	1	5.86291e-72	15
OAS2	1.26928e-12	0.314533	0.145	0.062	1.63648e-08	15
OSTF1	1.68574e-12	0.313778	0.556	0.435	2.17343e-08	15
ELL2	3.16313e-11	0.309832	0.18	0.09	4.07822e-07	15
CST7	9.47486e-15	0.309785	0.532	0.378	1.22159e-10	15
AOAH	2.4762e-12	0.306889	0.138	0.057	3.19257e-08	15
RSAD2	1.10292e-09	0.306808	0.133	0.063	1.422e-05	15
SERPINB9	3.41515e-10	0.306117	0.195	0.108	4.40315e-06	15
PDE4D	1.19655e-09	0.30558	0.249	0.153	1.54271e-05	15
FLT3LG	1.8759e-11	0.304861	0.218	0.117	2.4186e-07	15
RPL10	7.88453e-63	0.301023	1	0.998	1.01655e-58	15
GPX4	1.50379e-19	0.296869	0.736	0.577	1.93884e-15	15
NAF1	2.78721e-09	0.29556	0.273	0.176	3.59355e-05	15
GZMK	1.86403e-12	0.295314	0.117	0.044	2.40329e-08	15
CD37	2.05224e-13	0.291151	0.631	0.506	2.64595e-09	15
ENSSSCG00000004970	6.7042e-78	0.290301	1	1	8.64373e-74	15
ENSSSCG00000038960	1.34172e-09	0.288142	0.168	0.089	1.72988e-05	15
UBE2L6	9.76772e-11	0.285674	0.467	0.344	1.25935e-06	15
UBB	1.26678e-27	0.281318	0.997	0.996	1.63325e-23	15
ENSSSCG00000015390	7.76749e-09	0.279397	0.119	0.055	0.000100146	15
FURIN	9.03677e-07	0.278704	0.165	0.1	0.0116511	15
RPL23	2.98208e-55	0.277214	1	1	3.8448e-51	15
BST2	4.6988e-10	0.274908	0.515	0.402	6.05816e-06	15
PHTF1	2.11634e-07	0.272962	0.185	0.112	0.0027286	15
PLEKHA1	1.36977e-08	0.272643	0.161	0.088	0.000176604	15
VPS37B	8.63414e-15	0.265179	0.122	0.041	1.1132e-10	15
SLC11A2	2.44525e-07	0.264152	0.242	0.162	0.00315266	15
PHKG2	2.26711e-07	0.263506	0.237	0.158	0.00292298	15
CD5	3.25308e-09	0.262967	0.624	0.53	4.1942e-05	15
ENSSSCG00000033697	1.41575e-27	0.260142	0.977	0.941	1.82533e-23	15
PTGER4	1.12305e-08	0.258683	0.258	0.163	0.000144795	15
BCL2L11	8.53605e-08	0.255927	0.179	0.105	0.00110055	15
ENSSSCG00000033037	3.61671e-08	0.254294	0.152	0.082	0.000466303	15
PARP8	2.12466e-07	0.253667	0.156	0.088	0.00273933	15
HERC5	1.63626e-07	0.251962	0.126	0.066	0.00210962	15
ND1	1.31166e-15	0.25155	0.916	0.877	1.69112e-11	15
RBM39	3.588e-08	-0.250249	0.43	0.541	0.0004626	15
YWHAQ	5.69519e-10	-0.250684	0.189	0.307	7.34281e-06	15
YWHAH	6.31216e-08	-0.251157	0.158	0.256	0.000813827	15
ENSSSCG00000035728	5.12426e-07	-0.25187	0.25	0.343	0.0066067	15
TPR	2.7215e-08	-0.252033	0.304	0.421	0.000350883	15
PSIP1	4.12317e-07	-0.252097	0.412	0.5	0.005316	15
ENSSSCG00000016100	9.32529e-09	-0.252852	0.249	0.36	0.000120231	15
TRPS1	2.29541e-08	-0.25406	0.074	0.154	0.000295947	15
RAB27A	4.39847e-08	-0.254121	0.236	0.347	0.000567095	15
HNRNPA1	3.10298e-08	-0.25435	0.111	0.201	0.000400067	15
HNRNPC	2.47001e-08	-0.255655	0.485	0.577	0.000318458	15
TMSB10	2.98535e-32	-0.257828	1	1	3.84901e-28	15
RAB11A	1.58509e-08	-0.258529	0.154	0.254	0.000204366	15
TENT5C	2.70373e-08	-0.258745	0.106	0.196	0.000348592	15
EIF4A2	2.31617e-17	-0.259076	0.782	0.872	2.98623e-13	15
ADH5	1.91841e-07	-0.259263	0.167	0.258	0.00247341	15
FBL	2.38119e-08	-0.259657	0.158	0.26	0.000307007	15
LCK	6.04014e-11	-0.26026	0.707	0.789	7.78755e-07	15
ENSSSCG00000009327	1.1612e-07	-0.261676	0.806	0.827	0.00149714	15
PITHD1	1.30161e-08	-0.261883	0.101	0.191	0.000167817	15
ENO1	1.30053e-10	-0.262083	0.749	0.795	1.67677e-06	15
CITED2	3.20788e-06	-0.26334	0.106	0.176	0.0413591	15
IGFBP2	3.62705e-08	-0.263444	0.038	0.103	0.000467636	15
PHB2	5.18444e-09	-0.263662	0.212	0.322	6.68429e-05	15
TRA2A	1.30285e-07	-0.264124	0.126	0.214	0.00167977	15
SUGT1	5.47647e-08	-0.266329	0.158	0.251	0.000706081	15
IRF3	1.55212e-07	-0.266596	0.138	0.223	0.00200114	15
TMEM263	7.24254e-08	-0.268005	0.157	0.251	0.000933781	15
ENSSSCG00000026064	1.07844e-08	-0.269713	0.278	0.386	0.000139044	15
TCEA1	1.28755e-07	-0.270158	0.279	0.379	0.00166004	15
ARL6IP6	1.36055e-11	-0.270232	0.056	0.151	1.75416e-07	15
SERPINF1	4.23039e-07	-0.270368	0.26	0.352	0.00545424	15
COX17	1.0704e-09	-0.270463	0.532	0.625	1.38007e-05	15
TPM4	1.53177e-11	-0.271119	0.097	0.21	1.97491e-07	15
HNRNPH1	4.05346e-09	-0.271269	0.33	0.447	5.22612e-05	15
TUBB4B	1.13127e-06	-0.27151	0.133	0.211	0.0145855	15
SNRPD3	4.0022e-10	-0.271821	0.207	0.328	5.16004e-06	15
ENSSSCG00000040118	3.79463e-08	-0.271852	0.483	0.585	0.000489242	15
ATP5MC1	1.91393e-09	-0.271923	0.411	0.522	2.46763e-05	15
LBH	5.14754e-08	-0.272013	0.172	0.271	0.000663672	15
IKZF2	3.83408e-09	-0.27252	0.096	0.188	4.94328e-05	15
ENSSSCG00000003914	5.81692e-09	-0.272793	0.515	0.6	7.49975e-05	15
PSMB8	1.06649e-13	-0.273436	0.547	0.682	1.37502e-09	15
PHACTR2	2.26682e-09	-0.273659	0.082	0.171	2.92261e-05	15
ENSSSCG00000010320	8.94245e-11	-0.274551	0.282	0.415	1.15295e-06	15
CARHSP1	3.69716e-09	-0.274568	0.191	0.303	4.76675e-05	15
SPC24	7.41353e-13	-0.276872	0.04	0.133	9.55827e-09	15
ENSSSCG00000033987	6.91449e-09	-0.280025	0.133	0.233	8.91485e-05	15
ACOT7	1.23799e-10	-0.281833	0.097	0.2	1.59613e-06	15
HES6	1.44913e-08	-0.283131	0.088	0.173	0.000186837	15
CORO1A	4.0187e-17	-0.283357	0.746	0.809	5.18131e-13	15
HSPA8	1.71904e-12	-0.283403	0.889	0.903	2.21636e-08	15
ENSSSCG00000003348	3.36868e-10	-0.28558	0.216	0.34	4.34324e-06	15
CD3D	1.33129e-10	-0.286149	0.523	0.626	1.71643e-06	15
CKS1B	5.3014e-07	-0.289603	0.106	0.18	0.00683509	15
POU2AF1	1.49213e-12	-0.290842	0.027	0.111	1.9238e-08	15
RABEP1	2.04079e-08	-0.292772	0.101	0.188	0.00026312	15
ENSSSCG00000006061	2.33636e-10	-0.294557	0.38	0.503	3.01226e-06	15
LDLRAD4	1.34978e-08	-0.29532	0.045	0.114	0.000174026	15
ACYP1	4.90491e-11	-0.295588	0.082	0.183	6.3239e-07	15
EIF1B	1.15076e-08	-0.29573	0.33	0.44	0.000148367	15
BIRC5	5.45198e-09	-0.296269	0.054	0.128	7.02924e-05	15
GLIPR1	1.2894e-10	-0.296379	0.157	0.276	1.66242e-06	15
PPIL4	6.93373e-10	-0.296442	0.13	0.237	8.93965e-06	15
LYSMD2	3.74732e-11	-0.296905	0.036	0.117	4.83141e-07	15
SARNP	3.27277e-09	-0.298684	0.14	0.24	4.21958e-05	15
MDFIC	6.22039e-10	-0.298868	0.099	0.199	8.01995e-06	15
CACYBP	6.39354e-08	-0.29948	0.546	0.604	0.00082432	15
ZC3H12D	2.89191e-10	-0.301081	0.077	0.169	3.72855e-06	15
ENSSSCG00000026354	1.38833e-09	-0.301571	0.087	0.178	1.78997e-05	15
ANXA2	1.79417e-10	-0.302851	0.126	0.235	2.31322e-06	15
PTPN18	1.36818e-11	-0.306087	0.422	0.557	1.76399e-07	15
UGCG	3.04465e-09	-0.308194	0.105	0.201	3.92547e-05	15
CD8A	1.77415e-09	-0.308301	0.128	0.229	2.28742e-05	15
CALM3	1.29768e-10	-0.308832	0.293	0.413	1.6731e-06	15
CD3G	7.20398e-18	-0.309795	0.782	0.859	9.28809e-14	15
SLC1A5	8.19028e-13	-0.313675	0.026	0.111	1.05597e-08	15
PSMA7	1.70377e-14	-0.313937	0.468	0.6	2.19667e-10	15
ENSSSCG00000033068	4.95992e-12	-0.314781	0.43	0.554	6.39482e-08	15
GNG2	7.698e-09	-0.319074	0.43	0.528	9.92504e-05	15
REL	4.40636e-08	-0.319135	0.231	0.335	0.000568112	15
FUT8	4.11382e-10	-0.321968	0.078	0.17	5.30395e-06	15
ENSSSCG00000034697	8.4676e-11	-0.323291	0.135	0.249	1.09173e-06	15
ZNRF1	2.16667e-12	-0.323541	0.216	0.352	2.79349e-08	15
DNAJB1	1.17437e-07	-0.32574	0.298	0.407	0.00151411	15
ENSSSCG00000028397	4.14179e-08	-0.32643	0.273	0.374	0.000534001	15
NDFIP1	8.39368e-13	-0.327195	0.481	0.602	1.0822e-08	15
ATF4	3.58326e-12	-0.327853	0.564	0.668	4.61989e-08	15
RBM17	9.80788e-12	-0.32939	0.124	0.241	1.26453e-07	15
INPP1	3.6562e-14	-0.32995	0.026	0.118	4.71394e-10	15
PTPRC	1.33108e-23	-0.33051	0.839	0.91	1.71616e-19	15
LAT	1.11315e-11	-0.333835	0.538	0.644	1.43519e-07	15
NUCKS1	1.37923e-10	-0.334384	0.312	0.43	1.77824e-06	15
MAX	3.06259e-10	-0.335813	0.355	0.479	3.9486e-06	15
POLE4	1.07982e-13	-0.336459	0.327	0.471	1.39222e-09	15
FABP3	7.77672e-12	-0.338078	0.07	0.17	1.00265e-07	15
MALT1	2.44389e-11	-0.338182	0.089	0.194	3.15091e-07	15
NAP1L1	2.84714e-16	-0.338319	0.621	0.713	3.67082e-12	15
BAZ1A	1.20121e-09	-0.340124	0.273	0.387	1.54872e-05	15
PRDX2	2.25393e-09	-0.340181	0.14	0.24	2.906e-05	15
ENSSSCG00000001779	1.07042e-10	-0.341713	0.333	0.444	1.3801e-06	15
EZR	4.1708e-11	-0.343209	0.379	0.508	5.37741e-07	15
YWHAB	3.55856e-20	-0.347909	0.585	0.711	4.58805e-16	15
PECAM1	1.14065e-10	-0.348862	0.032	0.108	1.47063e-06	15
TCF7	1.10233e-11	-0.349889	0.264	0.395	1.42124e-07	15
ENSSSCG00000017749	4.8206e-08	-0.350102	0.341	0.44	0.00062152	15
FKBP5	1.0836e-09	-0.353987	0.111	0.208	1.39709e-05	15
JARID2	4.32317e-12	-0.355958	0.384	0.514	5.57387e-08	15
PFN1	5.40687e-20	-0.356147	0.75	0.832	6.97108e-16	15
NANS	8.86155e-16	-0.357145	0.237	0.395	1.14252e-11	15
CDKN2C	1.38241e-16	-0.35764	0.037	0.151	1.78234e-12	15
ACTB	3.62191e-21	-0.35914	0.913	0.965	4.66973e-17	15
ENSSSCG00000026140	1.98619e-10	-0.359647	0.093	0.191	2.5608e-06	15
SQLE	7.03596e-15	-0.360493	0.07	0.192	9.07146e-11	15
BTG1	3.50085e-12	-0.362637	0.972	0.975	4.51364e-08	15
SOD1	2.08558e-17	-0.362929	0.464	0.606	2.68894e-13	15
SS18L2	2.75515e-12	-0.366192	0.254	0.387	3.55221e-08	15
DNAJA1	5.31229e-18	-0.367136	0.527	0.682	6.84913e-14	15
MSMO1	3.96747e-13	-0.36745	0.065	0.173	5.11526e-09	15
COMMD3	1.92656e-13	-0.367617	0.085	0.201	2.48392e-09	15
SNRPN	4.56054e-12	-0.367643	0.189	0.314	5.87991e-08	15
C1orf21	3.00153e-12	-0.369721	0.057	0.154	3.86987e-08	15
PARP1	2.17349e-14	-0.373605	0.11	0.241	2.80228e-10	15
AKR1B1	1.28916e-17	-0.376205	0.045	0.169	1.66211e-13	15
IFRD1	6.90539e-09	-0.377557	0.093	0.179	8.90312e-05	15
ENSSSCG00000006156	2.21247e-14	-0.378862	0.05	0.156	2.85253e-10	15
DUT	5.10687e-07	-0.380525	0.212	0.295	0.00658429	15
PSMB1	3.46591e-18	-0.380642	0.411	0.559	4.4686e-14	15
PNRC1	8.56731e-15	-0.381597	0.61	0.721	1.10458e-10	15
CXCR6	2.45874e-13	-0.382896	0.034	0.128	3.17006e-09	15
SRSF7	7.59935e-15	-0.383107	0.342	0.487	9.79784e-11	15
PTPRCAP	1.15548e-28	-0.38485	0.772	0.873	1.48977e-24	15
CAPZA2	4.08451e-14	-0.384948	0.316	0.467	5.26616e-10	15
SAT1	2.07067e-21	-0.394312	0.96	0.969	2.66972e-17	15
ID3	6.7856e-12	-0.394331	0.066	0.165	8.74868e-08	15
TRA2B	2.96597e-19	-0.395618	0.381	0.566	3.82403e-15	15
ENSSSCG00000037602	2.99862e-10	-0.395859	0.499	0.596	3.86613e-06	15
ACADM	2.92311e-17	-0.400021	0.069	0.201	3.76877e-13	15
INSIG1	5.65552e-08	-0.40088	0.128	0.214	0.000729166	15
GRAMD2B	5.71596e-13	-0.402866	0.12	0.244	7.36959e-09	15
NCALD	1.48766e-13	-0.403524	0.134	0.261	1.91804e-09	15
TSPO	3.88042e-15	-0.405519	0.12	0.253	5.00302e-11	15
SEC62	1.21441e-14	-0.405904	0.204	0.35	1.56574e-10	15
TRAM1	7.02937e-16	-0.412798	0.293	0.449	9.06297e-12	15
ENSSSCG00000004963	3.07474e-16	-0.421295	0.209	0.363	3.96426e-12	15
GADD45A	1.84064e-14	-0.424667	0.098	0.223	2.37313e-10	15
TNF	9.7002e-14	-0.425471	0.022	0.109	1.25065e-09	15
BCAS2	3.71967e-09	-0.434399	0.316	0.429	4.79577e-05	15
CYCS	4.8656e-12	-0.438811	0.473	0.58	6.27322e-08	15
SLC25A5	2.03028e-19	-0.439274	0.383	0.532	2.61764e-15	15
EIF1	4.01474e-49	-0.439437	0.991	0.994	5.1762e-45	15
PKM	6.31343e-21	-0.454832	0.46	0.613	8.13991e-17	15
HIF1A	4.29264e-19	-0.458045	0.214	0.391	5.5345e-15	15
ITGB2	4.72524e-19	-0.459017	0.205	0.381	6.09225e-15	15
CTLA4	2.68733e-17	-0.461093	0.207	0.377	3.46478e-13	15
PLIN2	1.11745e-19	-0.461345	0.077	0.226	1.44073e-15	15
ICOS	2.15825e-19	-0.469767	0.286	0.463	2.78263e-15	15
IKZF3	4.82586e-19	-0.470727	0.182	0.356	6.22198e-15	15
CXCR5	3.86176e-20	-0.471486	0.017	0.133	4.97897e-16	15
CD247	3.731e-17	-0.476896	0.527	0.66	4.81038e-13	15
TRIB1	1.49478e-17	-0.477274	0.096	0.237	1.92722e-13	15
CD9	4.01505e-23	-0.481301	0.013	0.141	5.1766e-19	15
HMGN2	5.15569e-26	-0.48214	0.765	0.851	6.64723e-22	15
METTL8	6.2677e-17	-0.485653	0.017	0.116	8.08095e-13	15
DAPP1	9.34484e-20	-0.492075	0.056	0.194	1.20483e-15	15
ENSSSCG00000014013	7.2884e-20	-0.492362	0.101	0.256	9.39693e-16	15
ENSSSCG00000015499	2.89381e-17	-0.494569	0.139	0.287	3.73098e-13	15
TIGIT	6.03968e-24	-0.506099	0.082	0.258	7.78696e-20	15
SERHL2	5.39668e-24	-0.50625	0.036	0.186	6.95794e-20	15
ATF3	6.78448e-14	-0.509419	0.084	0.2	8.74723e-10	15
HINT1	2.09096e-29	-0.512459	0.719	0.809	2.69587e-25	15
ZFP36L1	1.62721e-29	-0.524413	0.541	0.729	2.09796e-25	15
IL6ST	1.06188e-22	-0.526337	0.043	0.19	1.36908e-18	15
ENSSSCG00000037081	4.01236e-39	-0.526817	0.602	0.76	5.17313e-35	15
DARS	3.30253e-18	-0.544254	0.111	0.257	4.25796e-14	15
GAPDH	1.54542e-54	-0.552353	0.83	0.921	1.99252e-50	15
ENSSSCG00000037775	6.03928e-20	-0.561155	0.503	0.649	7.78644e-16	15
TNFAIP8	8.34395e-27	-0.562514	0.342	0.551	1.07579e-22	15
IL6R	3.47077e-18	-0.563856	0.158	0.311	4.47486e-14	15
H3F3B	2.96667e-59	-0.579103	0.99	0.998	3.82493e-55	15
LGMN	1.10886e-36	-0.580016	0.334	0.604	1.42965e-32	15
TUBA4A	4.94831e-27	-0.581651	0.199	0.41	6.37986e-23	15
BTG2	3.20734e-22	-0.582398	0.239	0.426	4.13522e-18	15
RPA3	8.39561e-25	-0.583047	0.157	0.347	1.08245e-20	15
SRGN	5.8664e-64	-0.587121	0.981	0.994	7.56355e-60	15
ENSSSCG00000037885	1.35842e-41	-0.597628	0.884	0.952	1.75142e-37	15
ITM2A	3.94693e-20	-0.607553	0.013	0.126	5.08878e-16	15
H2AFZ	6.70511e-23	-0.611083	0.522	0.654	8.6449e-19	15
ENSSSCG00000000635	7.72673e-26	-0.612676	0.195	0.402	9.96207e-22	15
CKS2	5.76129e-23	-0.618522	0.278	0.456	7.42803e-19	15
GSPT2	2.23821e-18	-0.637674	0.071	0.205	2.88572e-14	15
PCLAF	4.00482e-10	-0.650403	0.064	0.147	5.16342e-06	15
TUBB	9.48561e-16	-0.660472	0.196	0.335	1.22298e-11	15
TOX	8.05736e-30	-0.67051	0.117	0.324	1.03884e-25	15
STMN1	2.46336e-14	-0.675762	0.297	0.426	3.17601e-10	15
BATF	5.40215e-23	-0.675835	0.129	0.309	6.965e-19	15
PPP1R15A	1.15374e-29	-0.680289	0.309	0.52	1.48752e-25	15
DDIT4	3.29815e-23	-0.684461	0.236	0.426	4.25231e-19	15
GPR174	1.64549e-36	-0.703806	0.182	0.434	2.12153e-32	15
ENSSSCG00000003236	2.08356e-33	-0.706453	0.017	0.195	2.68634e-29	15
HMGN3	7.57227e-39	-0.716735	0.221	0.473	9.76293e-35	15
DUSP1	5.05762e-25	-0.721722	0.17	0.364	6.52079e-21	15
DHRS3	4.84316e-37	-0.724028	0.101	0.339	6.24429e-33	15
ENSSSCG00000038351	3.20134e-34	-0.729317	0.255	0.497	4.12749e-30	15
VMP1	7.59509e-49	-0.73552	0.452	0.72	9.79235e-45	15
HIST1H2AB	1.12734e-07	-0.832808	0.255	0.344	0.00145348	15
TUBA1B	1.83159e-49	-0.874997	0.583	0.772	2.36147e-45	15
RGCC	2.45149e-34	-0.887777	0.302	0.534	3.16071e-30	15
SH2D1A	2.95143e-49	-0.907927	0.18	0.475	3.80527e-45	15
CXCR4	3.22303e-43	-0.908481	0.393	0.651	4.15545e-39	15
ICA1	7.6366e-42	-0.963209	0.005	0.211	9.84587e-38	15
GYPC	1.72632e-53	-0.978145	0.166	0.466	2.22575e-49	15
ENSSSCG00000031912	5.77617e-52	-0.980092	0.33	0.625	7.44722e-48	15
RBM38	1.66856e-52	-1.00459	0.167	0.464	2.15127e-48	15
LAG3	2.55978e-41	-1.0113	0.115	0.37	3.30032e-37	15
FOS	4.79916e-38	-1.08199	0.233	0.487	6.18756e-34	15
CD69	1.01348e-65	-1.13331	0.324	0.653	1.30668e-61	15
LTB	3.17196e-55	-1.1935	0.224	0.536	4.0896e-51	15
PDCD1	5.47267e-95	-1.36551	0.156	0.577	7.05592e-91	15
RAE1	3.36189e-82	-1.70931	0.19	0.566	4.33449e-78	15
ENSSSCG00000031023	2.49126e-76	-2.1296	0.023	0.369	3.21198e-72	15
IL22	1.6265e-11	0.928606	0.177	0.081	2.09704e-07	26
CCR7	1.4937e-24	0.593911	0.323	0.136	1.92583e-20	26
RGCC	5.78068e-16	0.523232	0.6	0.436	7.45303e-12	26
DDIT4	4.25983e-11	0.456892	0.479	0.346	5.4922e-07	26
ZFP36L2	4.90029e-18	0.400516	0.892	0.834	6.31795e-14	26
ENSSSCG00000017749	2.66451e-08	0.365232	0.494	0.393	0.000343535	26
TNFAIP8	1.02483e-09	0.361558	0.577	0.471	1.32131e-05	26
ELF1	3.72745e-10	0.347414	0.644	0.541	4.80581e-06	26
ENSSSCG00000000635	2.53273e-07	0.332163	0.425	0.323	0.00326544	26
BTG1	9.97175e-22	0.331758	0.985	0.972	1.28566e-17	26
NCOA7	3.32474e-06	0.330205	0.277	0.193	0.0428659	26
GLA	5.52948e-07	0.316479	0.165	0.091	0.00712916	26
CRTAM	1.82963e-07	0.311727	0.227	0.137	0.00235895	26
GPX4	5.0786e-08	0.298886	0.683	0.611	0.000654783	26
UTRN	1.23123e-06	0.294242	0.317	0.22	0.0158742	26
SS18L2	3.40635e-06	0.290554	0.415	0.333	0.043918	26
CREM	6.59207e-15	0.278124	0.894	0.777	8.49916e-11	26
PNRC1	2.16569e-08	0.269906	0.735	0.678	0.000279222	26
ENSSSCG00000003914	1.44602e-08	-0.263796	0.467	0.599	0.000186435	26
ATP5MC1	6.57832e-07	-0.265275	0.404	0.508	0.00848142	26
PSMB7	4.02112e-08	-0.269401	0.21	0.344	0.000518443	26
FAS	7.48848e-07	-0.279269	0.094	0.191	0.0096549	26
CD3G	1.75057e-11	-0.284801	0.752	0.855	2.25702e-07	26
ENSSSCG00000039071	4.09223e-08	-0.285512	0.402	0.523	0.000527612	26
AKR1B1	1.32279e-07	-0.293484	0.058	0.149	0.00170547	26
CST7	1.92158e-08	-0.301749	0.306	0.449	0.000247749	26
ENSSSCG00000012961	4.65154e-15	-0.322374	0.71	0.816	5.99723e-11	26
HSPA5	7.92056e-09	-0.329254	0.648	0.745	0.00010212	26
HINT1	1.33399e-09	-0.338454	0.729	0.794	1.71992e-05	26
ENSSSCG00000038351	3.13184e-06	-0.340027	0.333	0.446	0.0403788	26
DHRS3	1.31479e-06	-0.343859	0.183	0.288	0.0169516	26
RPA3	5.19601e-07	-0.358026	0.202	0.31	0.00669922	26
TIGIT	4.49362e-09	-0.358485	0.106	0.228	5.79362e-05	26
EMB	5.05896e-08	-0.362879	0.256	0.387	0.000652252	26
POMP	3.42249e-13	-0.390172	0.335	0.51	4.41262e-09	26
C15orf48	9.63346e-07	-0.399808	0.16	0.268	0.0124204	26
IFI6	2.71616e-13	-0.462291	0.833	0.906	3.50195e-09	26
PDCD1	1.00504e-08	-0.476356	0.35	0.476	0.00012958	26
TUBB	1.45436e-06	-0.500746	0.212	0.312	0.0187511	26
CTLA4	1.0109e-15	-0.502122	0.169	0.362	1.30335e-11	26
BST2	2.63895e-18	-0.587291	0.269	0.472	3.4024e-14	26
PCLAF	3.70105e-06	-0.593077	0.062	0.136	0.0477176	26
RAE1	8.36426e-09	-0.689505	0.35	0.479	0.00010784	26
ENSSSCG00000036618	1.39332e-13	-0.70274	0.521	0.621	1.79641e-09	26
LAG3	1.13466e-16	-0.769641	0.144	0.329	1.46291e-12	26
IL10	7.73923e-17	-0.845157	0.083	0.258	9.97819e-13	26
ENSSSCG00000031023	1.6387e-09	-0.942206	0.169	0.289	2.11277e-05	26
LAG3	4.77187e-60	1.15832	0.673	0.248	6.15237e-56	41
TIMP1	3.02539e-26	1.11031	0.471	0.225	3.90064e-22	41
IL10	1.43506e-50	1.04977	0.556	0.186	1.85022e-46	41
ENSSSCG00000038351	2.72986e-51	0.87478	0.788	0.38	3.51961e-47	41
CTLA4	1.53754e-36	0.823156	0.616	0.291	1.98236e-32	41
CCL5	1.85007e-17	0.799561	0.529	0.315	2.38529e-13	41
ENSSSCG00000015447	2.45897e-18	0.752123	0.347	0.154	3.17036e-14	41
BST2	4.57395e-20	0.708026	0.633	0.411	5.89719e-16	41
DUSP5	1.58062e-19	0.694499	0.401	0.187	2.03789e-15	41
ATP2B1	1.92522e-20	0.683843	0.37	0.165	2.48219e-16	41
ISG20	7.35226e-18	0.647552	0.461	0.25	9.47926e-14	41
ENSSSCG00000016903	6.74294e-07	0.595788	0.279	0.167	0.00869367	41
ISG15	2.32728e-11	0.577268	0.801	0.671	3.00057e-07	41
TNFRSF1B	3.01142e-23	0.565638	0.667	0.407	3.88263e-19	41
ENSSSCG00000024973	4.59151e-13	0.528523	0.582	0.409	5.91983e-09	41
PRDM1	1.36281e-13	0.500709	0.209	0.08	1.75707e-09	41
NFKBIB	1.36905e-13	0.50064	0.579	0.396	1.76512e-09	41
ENSSSCG00000036892	1.30116e-15	0.493873	0.29	0.122	1.67759e-11	41
CFLAR	8.17059e-12	0.488675	0.623	0.479	1.05343e-07	41
SDF4	9.04067e-13	0.484809	0.556	0.388	1.16561e-08	41
RAB12	8.62223e-13	0.477944	0.226	0.092	1.11166e-08	41
IRF8	3.71995e-07	0.472722	0.212	0.115	0.00479613	41
CTSC	1.09126e-19	0.471565	0.902	0.818	1.40696e-15	41
EMB	2.2078e-11	0.468176	0.519	0.344	2.84652e-07	41
HSPA5	6.26387e-16	0.462021	0.838	0.714	8.07601e-12	41
IFI6	1.03518e-19	0.461948	0.96	0.885	1.33466e-15	41
ENSSSCG00000006380	3.66305e-09	0.452727	0.384	0.242	4.72278e-05	41
CD74	1.58553e-12	0.445288	0.721	0.59	2.04422e-08	41
LRRC1	1.85589e-12	0.426813	0.152	0.049	2.3928e-08	41
ENSSSCG00000010954	1.13306e-10	0.422564	0.539	0.375	1.46086e-06	41
GPR183	3.9494e-14	0.422115	0.71	0.499	5.09196e-10	41
C15orf48	4.7569e-08	0.41669	0.37	0.233	0.000613307	41
ENSSSCG00000012397	1.94895e-12	0.412486	0.758	0.607	2.51277e-08	41
MDFIC	2.93727e-11	0.410924	0.303	0.153	3.78702e-07	41
CTSB	5.4549e-11	0.405594	0.438	0.272	7.033e-07	41
IL21R	6.29854e-08	0.404356	0.313	0.188	0.000812071	41
LGMN	1.18441e-09	0.402899	0.663	0.507	1.52706e-05	41
IL4R	1.08974e-08	0.398333	0.313	0.183	0.0001405	41
PNP	7.02297e-07	0.395686	0.212	0.118	0.00905472	41
ATP5MC1	2.18018e-10	0.393965	0.633	0.472	2.8109e-06	41
REL	1.70381e-06	0.391871	0.404	0.292	0.0219673	41
TRAF4	2.89077e-08	0.386401	0.249	0.133	0.000372707	41
FOXP3	8.20034e-15	0.383661	0.104	0.022	1.05727e-10	41
CISD2	1.44518e-09	0.37729	0.279	0.147	1.86327e-05	41
GPR171	1.06939e-07	0.374336	0.236	0.127	0.00137876	41
ENSSSCG00000032459	7.50748e-08	0.371672	0.306	0.181	0.000967939	41
GPR34	2.1087e-09	0.370883	0.158	0.064	2.71874e-05	41
ENSSSCG00000036096	6.20211e-11	0.370684	0.744	0.571	7.99639e-07	41
SAMSN1	1.43043e-06	0.366272	0.36	0.235	0.0184426	41
STX11	1.19302e-07	0.364354	0.364	0.235	0.00153817	41
ENSSSCG00000033909	2.07001e-09	0.362668	0.754	0.637	2.66886e-05	41
ENSSSCG00000014565	2.35059e-19	0.361335	0.993	0.978	3.03062e-15	41
MANF	1.93241e-06	0.361144	0.444	0.319	0.0249145	41
TNIP3	7.81691e-11	0.350458	0.104	0.029	1.00783e-06	41
KDM6B	3.84432e-06	0.344072	0.253	0.151	0.0495648	41
ENSSSCG00000007088	6.98222e-07	0.338455	0.562	0.45	0.00900218	41
JOSD1	2.03872e-06	0.337913	0.222	0.127	0.0262853	41
NDFIP2	4.94433e-07	0.337632	0.599	0.466	0.00637473	41
NKG7	3.60648e-07	0.334631	0.33	0.205	0.00464983	41
ENSSSCG00000025499	1.36605e-06	0.330316	0.535	0.418	0.0176125	41
GRAMD2B	1.59673e-08	0.328453	0.337	0.191	0.000205866	41
PIM1	3.57137e-08	0.327039	0.266	0.145	0.000460456	41
JAML	1.5047e-06	0.321946	0.158	0.077	0.0194	41
RAP1A	9.8335e-09	0.315438	0.761	0.643	0.000126783	41
ICOS	2.56454e-07	0.314024	0.535	0.396	0.00330646	41
SELENOS	1.54688e-07	0.312191	0.293	0.172	0.0019944	41
ENSSSCG00000033385	1.70767e-06	0.308493	0.215	0.117	0.022017	41
ENSSSCG00000000657	1.03978e-06	0.304229	0.562	0.439	0.0134059	41
SPCS1	4.58206e-07	0.292961	0.653	0.545	0.00590766	41
PELI1	8.02167e-08	0.282501	0.212	0.105	0.00103423	41
FAS	2.4807e-07	0.274017	0.279	0.16	0.00319836	41
UBB	8.39739e-14	0.273302	0.997	0.996	1.08268e-09	41
SRGN	6.88075e-16	0.27319	0.997	0.989	8.87136e-12	41
COX1	3.34504e-16	0.270827	1	0.999	4.31276e-12	41
ZFP36L1	6.3369e-08	0.269067	0.781	0.66	0.000817016	41
AHR	1.43561e-06	0.265704	0.138	0.063	0.0185093	41
CD3G	6.68524e-09	0.265445	0.912	0.827	8.61928e-05	41
RAE1	1.95488e-08	0.262853	0.613	0.436	0.000252043	41
ENSSSCG00000016758	1.39374e-09	0.260343	0.919	0.835	1.79695e-05	41
BCL2L1	3.1793e-06	0.257669	0.101	0.041	0.0409907	41
CXCR6	1.15047e-06	0.250778	0.182	0.09	0.014833	41
PNISR	2.17381e-06	-0.263556	0.364	0.503	0.0280269	41
RBM39	2.45403e-06	-0.294201	0.38	0.524	0.0316397	41
FYB1	5.36663e-07	-0.334275	0.34	0.489	0.0069192	41
ENSSSCG00000006156	4.86827e-07	-0.358288	0.034	0.136	0.00627666	41
ENSSSCG00000001075	9.16923e-08	-0.366274	0.3	0.466	0.00118219	41
PIK3R1	8.78451e-07	-0.370592	0.178	0.325	0.0113259	41
CCND3	9.37008e-07	-0.37435	0.168	0.303	0.0120808	41
GPSM3	2.03197e-08	-0.375783	0.239	0.4	0.000261982	41
ENSSSCG00000028397	2.67954e-06	-0.389083	0.232	0.358	0.0345473	41
ID3	1.53303e-06	-0.407568	0.047	0.147	0.0197653	41
CAMK4	1.11393e-08	-0.414481	0.084	0.226	0.000143619	41
NCK1	7.31962e-08	-0.423369	0.067	0.194	0.000943718	41
ABLIM1	9.38964e-09	-0.470596	0.239	0.397	0.000121061	41
FKBP5	2.41979e-08	-0.471881	0.064	0.194	0.000311983	41
RGCC	9.28454e-09	-0.486625	0.303	0.486	0.000119706	41
SH2D1A	6.82964e-09	-0.565165	0.249	0.406	8.80546e-05	41
ICA1	4.52943e-07	-0.56776	0.054	0.163	0.0058398	41
ATF3	2.80582e-09	-0.61475	0.047	0.181	3.61754e-05	41
CD69	1.51245e-08	-0.641638	0.434	0.571	0.000195	41
GYPC	6.13892e-11	-0.662531	0.219	0.398	7.91491e-07	41
ENSSSCG00000031912	5.05033e-11	-0.732465	0.384	0.558	6.51139e-07	41
TCF7	1.9839e-18	-0.76466	0.131	0.385	2.55784e-14	41
LTB	4.96172e-16	-0.9187	0.226	0.472	6.39715e-12	41
FOS	3.30271e-12	-0.969936	0.249	0.433	4.25818e-08	41
ENSSSCG00000031023	1.66848e-12	-1.25192	0.104	0.288	2.15117e-08	41
HIST1H2AB	1.01543e-84	2.44147	0.874	0.275	1.30919e-80	46
PCLAF	3.56545e-242	2.23733	0.853	0.067	4.59694e-238	46
STMN1	4.56837e-104	1.93938	0.932	0.347	5.89e-100	46
UBE2C	1.16961e-184	1.90468	0.6	0.035	1.50797e-180	46
TUBB	4.34614e-101	1.80575	0.858	0.251	5.60348e-97	46
HMGB2	3.35754e-66	1.62329	0.958	0.638	4.32888e-62	46
DUT	1.72636e-128	1.60961	0.932	0.22	2.2258e-124	46
TUBA1B	2.46575e-63	1.53545	0.958	0.698	3.17909e-59	46
TOP2A	5.62787e-157	1.40156	0.568	0.038	7.25601e-153	46
H2AFZ	1.95928e-72	1.35781	0.974	0.588	2.52609e-68	46
BIRC5	5.11827e-185	1.32595	0.726	0.059	6.59898e-181	46
TK1	4.18149e-243	1.29827	0.663	0.025	5.3912e-239	46
CKS1B	3.32891e-135	1.23605	0.789	0.11	4.29196e-131	46
HMGN2	6.1789e-64	1.21644	0.979	0.814	7.96645e-60	46
TPX2	8.60919e-239	1.20349	0.647	0.023	1.10998e-234	46
SPC24	7.34077e-187	1.13079	0.737	0.057	9.46446e-183	46
PCNA	1.82695e-61	1.12511	0.789	0.253	2.35548e-57	46
SMC2	5.861e-151	1.10567	0.7	0.068	7.55659e-147	46
CENPF	1.40589e-151	1.07556	0.568	0.04	1.81262e-147	46
FABP3	2.42878e-109	1.04475	0.684	0.099	3.13143e-105	46
ENSSSCG00000009327	3.9333e-60	1.03864	1	0.808	5.0712e-56	46
CENPE	2.44306e-143	1.00303	0.642	0.057	3.14984e-139	46
SMC4	1.04486e-63	0.983265	0.805	0.243	1.34714e-59	46
CKS2	1.36192e-53	0.945324	0.9	0.366	1.75593e-49	46
ENSSSCG00000010214	1.16524e-169	0.935885	0.574	0.033	1.50235e-165	46
LMNB1	1.69443e-175	0.91175	0.679	0.048	2.18463e-171	46
RPA3	1.94651e-67	0.891642	0.863	0.247	2.50963e-63	46
TUBB4B	5.68738e-54	0.888664	0.621	0.155	7.33274e-50	46
KPNA2	2.40362e-96	0.870096	0.558	0.068	3.09898e-92	46
KIFC1	2.01697e-208	0.853151	0.532	0.015	2.60048e-204	46
ENSSSCG00000005453	2.72165e-51	0.85133	0.916	0.445	3.50902e-47	46
MAD2L1	6.22568e-121	0.827054	0.674	0.078	8.02677e-117	46
HIST1H2AG	2.29638e-135	0.818633	0.542	0.04	2.96073e-131	46
HMMR	3.06366e-190	0.808201	0.468	0.012	3.94997e-186	46
RANBP1	2.41293e-48	0.792081	0.816	0.293	3.11099e-44	46
ACTG1	3.55337e-54	0.780175	1	0.937	4.58135e-50	46
ENSSSCG00000016737	7.86303e-66	0.777814	1	0.942	1.01378e-61	46
H2AFV	3.37525e-41	0.777452	0.963	0.571	4.35171e-37	46
ENSSSCG00000035209	1.41907e-62	0.776585	0.742	0.182	1.82961e-58	46
ENSSSCG00000031117	2.16491e-80	0.774915	0.653	0.113	2.79122e-76	46
MCM7	8.07407e-96	0.753563	0.637	0.089	1.04099e-91	46
CENPA	2.19189e-164	0.741232	0.384	0.008	2.82601e-160	46
ENSSSCG00000031741	2.73847e-90	0.740293	0.516	0.061	3.53071e-86	46
NUF2	3.73617e-140	0.73999	0.453	0.023	4.81705e-136	46
ENSSSCG00000024776	7.66129e-50	0.739714	0.974	0.529	9.8777e-46	46
RAN	2.50038e-47	0.73919	0.984	0.671	3.22375e-43	46
MXD3	7.78739e-140	0.726767	0.411	0.017	1.00403e-135	46
ENSSSCG00000026302	3.69178e-181	0.723305	0.453	0.012	4.75981e-177	46
ENSSSCG00000039071	3.1365e-44	0.721699	0.953	0.467	4.04389e-40	46
DLGAP5	1.10576e-178	0.719418	0.442	0.011	1.42566e-174	46
SNRPD1	1.62541e-48	0.71481	0.905	0.352	2.09564e-44	46
ENSSSCG00000026064	2.41535e-47	0.713696	0.874	0.314	3.11411e-43	46
NUCKS1	4.08887e-40	0.706436	0.868	0.36	5.27178e-36	46
ENSSSCG00000032060	5.17659e-78	0.705832	0.7	0.13	6.67418e-74	46
ATP5MC3	6.78499e-45	0.700776	0.9	0.356	8.74788e-41	46
VIM	1.01052e-30	0.698717	0.637	0.224	1.30286e-26	46
DDX39A	1.90192e-91	0.696926	0.679	0.105	2.45214e-87	46
TMPO	2.80902e-106	0.691845	0.532	0.052	3.62167e-102	46
ASF1B	1.03779e-209	0.687986	0.458	0.007	1.33802e-205	46
CDC20	7.53395e-162	0.685457	0.379	0.008	9.71352e-158	46
TYMS	2.3116e-49	0.681681	0.774	0.234	2.98035e-45	46
CENPW	8.4511e-91	0.679339	0.616	0.086	1.0896e-86	46
SNRPE	1.32595e-44	0.678486	0.963	0.538	1.70955e-40	46
BBS7	7.75531e-138	0.677403	0.458	0.024	9.99893e-134	46
ERH	1.28477e-38	0.675831	0.921	0.475	1.65645e-34	46
CBX5	4.25348e-104	0.675239	0.621	0.075	5.48401e-100	46
MCM4	8.15725e-122	0.661766	0.505	0.039	1.05171e-117	46
UHRF1	2.926e-166	0.655025	0.437	0.013	3.7725e-162	46
MTFR2	4.08651e-183	0.648153	0.432	0.009	5.26874e-179	46
SIVA1	4.88579e-42	0.647997	0.705	0.213	6.29924e-38	46
ENSSSCG00000004969	8.3054e-131	0.643375	0.374	0.014	1.07082e-126	46
HIST2H2AC	1.79706e-77	0.640737	0.432	0.049	2.31695e-73	46
RPA2	3.94511e-102	0.640418	0.611	0.074	5.08643e-98	46
CCNB1	9.98521e-114	0.637209	0.358	0.017	1.28739e-109	46
SNRPF	8.08104e-40	0.636545	0.884	0.351	1.04189e-35	46
LYAR	3.06495e-103	0.6329	0.521	0.052	3.95164e-99	46
CDKN2C	1.36823e-75	0.628889	0.558	0.084	1.76406e-71	46
ENSSSCG00000017032	2.43314e-138	0.628811	0.426	0.019	3.13705e-134	46
CCNB2	7.79064e-167	0.627974	0.368	0.006	1.00445e-162	46
NDC80	2.8002e-174	0.618446	0.374	0.005	3.6103e-170	46
CENPU	4.85347e-144	0.615432	0.442	0.02	6.25757e-140	46
NPM3	3.85692e-43	0.614534	0.484	0.11	4.97273e-39	46
SGO1	1.7782e-175	0.606236	0.384	0.006	2.29264e-171	46
ATAD2	8.54296e-80	0.605419	0.463	0.055	1.10144e-75	46
ENSSSCG00000007493	1.40736e-121	0.603565	0.379	0.017	1.81451e-117	46
ENSSSCG00000028485	3.91968e-40	0.600177	0.989	0.827	5.05364e-36	46
SLC25A6	5.3979e-45	0.598592	0.989	0.866	6.95952e-41	46
CLSPN	5.07785e-135	0.594556	0.463	0.025	6.54688e-131	46
KIF11	1.23543e-150	0.591843	0.342	0.006	1.59284e-146	46
NANS	7.10762e-39	0.591736	0.847	0.311	9.16386e-35	46
SKA2	7.61176e-101	0.591226	0.542	0.058	9.81384e-97	46
ANXA2	3.64837e-58	0.586221	0.711	0.164	4.70384e-54	46
KIF20B	7.65995e-98	0.584562	0.447	0.039	9.87598e-94	46
CALM3	2.98455e-39	0.58135	0.905	0.337	3.84798e-35	46
LSM2	1.59401e-41	0.579043	0.805	0.262	2.05515e-37	46
CDCA3	1.88871e-152	0.5764	0.337	0.005	2.43511e-148	46
ACP1	1.21184e-38	0.573663	0.863	0.315	1.56243e-34	46
AURKB	3.6831e-146	0.566123	0.321	0.005	4.74862e-142	46
USP1	3.31887e-61	0.562682	0.705	0.153	4.27903e-57	46
CDCA8	4.96926e-118	0.559272	0.326	0.011	6.40687e-114	46
NME1	4.95571e-40	0.553905	0.626	0.179	6.38939e-36	46
MDH1	4.55012e-38	0.550233	0.795	0.268	5.86647e-34	46
KIF15	5.94557e-142	0.54947	0.342	0.008	7.66562e-138	46
RFC4	9.3751e-90	0.548385	0.468	0.048	1.20873e-85	46
HIST1H1D	3.27879e-69	0.546495	0.442	0.057	4.22735e-65	46
SNRPD3	7.46693e-41	0.546474	0.795	0.254	9.62711e-37	46
ENSSSCG00000035544	1.57256e-56	0.537665	0.537	0.101	2.0275e-52	46
GON7	7.76237e-56	0.535085	0.695	0.161	1.0008e-51	46
MCM6	1.77276e-86	0.532769	0.495	0.057	2.28563e-82	46
NCAPG	8.97242e-142	0.530874	0.368	0.01	1.15681e-137	46
CDT1	7.35143e-92	0.530236	0.374	0.028	9.47819e-88	46
MCM3	1.36154e-105	0.528884	0.358	0.019	1.75544e-101	46
COX7A2	6.07557e-29	0.527083	0.963	0.624	7.83323e-25	46
PSMB1	7.48295e-29	0.517827	0.947	0.482	9.64777e-25	46
SGO2	2.87568e-128	0.517487	0.305	0.006	3.70762e-124	46
POMP	1.74211e-28	0.517344	0.9	0.446	2.2461e-24	46
ENSSSCG00000028695	6.50075e-35	0.515677	0.2	0.024	8.38142e-31	46
ENSSSCG00000030295	1.32506e-31	0.515203	0.832	0.324	1.7084e-27	46
ENSSSCG00000003914	7.69437e-27	0.511586	0.932	0.548	9.92035e-23	46
LSM6	1.14571e-45	0.508768	0.684	0.181	1.47716e-41	46
ILF2	6.35665e-34	0.506821	0.763	0.27	8.19563e-30	46
KIF22	1.14253e-118	0.502357	0.289	0.007	1.47306e-114	46
CENPN	4.57092e-134	0.497386	0.332	0.008	5.89328e-130	46
TCF19	2.77959e-134	0.496148	0.332	0.008	3.58372e-130	46
ENSSSCG00000039107	3.7036e-139	0.4954	0.305	0.004	4.77505e-135	46
CDK4	6.10757e-53	0.489661	0.674	0.156	7.87449e-49	46
ENSSSCG00000034314	2.79674e-37	0.487971	0.832	0.282	3.60583e-33	46
ENSSSCG00000012961	3.11647e-30	0.487361	0.989	0.782	4.01807e-26	46
HSPA8	1.49169e-26	0.487012	1	0.891	1.92324e-22	46
POC1A	3.07493e-117	0.485125	0.432	0.027	3.9645e-113	46
ENSSSCG00000013232	6.4595e-54	0.483337	0.589	0.123	8.32823e-50	46
EZH2	6.3913e-72	0.480786	0.453	0.057	8.2403e-68	46
ATP5MC1	8.26706e-24	0.477355	0.895	0.458	1.06587e-19	46
DNMT1	1.21407e-38	0.477112	0.684	0.203	1.5653e-34	46
PSMB2	3.15651e-22	0.4771	0.921	0.508	4.06968e-18	46
YWHAQ	3.56413e-37	0.47507	0.753	0.236	4.59523e-33	46
SHCBP1	1.18124e-106	0.474899	0.305	0.011	1.52297e-102	46
HMGA1	1.80873e-42	0.464099	0.605	0.154	2.332e-38	46
ENSSSCG00000014031	5.25027e-32	0.463873	0.747	0.256	6.76918e-28	46
MRPS25	1.66001e-65	0.46291	0.684	0.133	2.14025e-61	46
ENSSSCG00000016100	2.62758e-31	0.458511	0.795	0.292	3.38774e-27	46
ENSSSCG00000016679	3.85776e-72	0.45846	0.442	0.054	4.97381e-68	46
ATP5F1A	6.12379e-21	0.457245	0.921	0.554	7.8954e-17	46
KIF4A	4.37093e-149	0.451662	0.305	0.003	5.63545e-145	46
TMEM258	4.62777e-28	0.448751	0.889	0.369	5.96659e-24	46
ARHGDIA	5.89509e-29	0.447666	0.842	0.331	7.60054e-25	46
RFC3	5.01668e-62	0.445248	0.432	0.061	6.468e-58	46
HSPD1	3.26668e-18	0.444775	0.821	0.419	4.21172e-14	46
CORO1A	1.65253e-23	0.442626	0.989	0.775	2.13061e-19	46
MRPS12	6.97122e-58	0.441668	0.563	0.105	8.988e-54	46
LSM3	3.82079e-42	0.440433	0.779	0.222	4.92614e-38	46
ENSSSCG00000008677	6.48379e-39	0.439332	0.505	0.121	8.35955e-35	46
HELLS	1.22131e-72	0.437787	0.395	0.042	1.57464e-68	46
ENSSSCG00000006830	1.28627e-36	0.437444	0.663	0.195	1.65839e-32	46
ENSSSCG00000034913	1.60206e-110	0.43665	0.321	0.013	2.06554e-106	46
CYTB	3.07e-22	0.436646	0.995	0.922	3.95815e-18	46
HSPE1	7.88348e-19	0.433478	0.979	0.793	1.01642e-14	46
NDUFV2	2.15019e-32	0.432602	0.737	0.247	2.77224e-28	46
NUDC	1.78733e-29	0.428876	0.763	0.27	2.30441e-25	46
UBE2T	2.35616e-70	0.42682	0.411	0.048	3.0378e-66	46
KPNB1	2.92298e-40	0.425701	0.621	0.163	3.7686e-36	46
PLAAT3	1.64409e-08	0.424642	0.153	0.051	0.000211972	46
ENSSSCG00000040857	2.0151e-22	0.423853	0.942	0.504	2.59807e-18	46
AP2S1	2.6594e-37	0.423802	0.816	0.263	3.42876e-33	46
BUB3	2.22478e-30	0.419463	0.595	0.183	2.86841e-26	46
TMSB10	9.84014e-33	0.419355	1	1	1.26869e-28	46
RNASEH2B	2.81907e-56	0.416513	0.368	0.049	3.63462e-52	46
SMC3	2.10143e-23	0.415576	0.837	0.364	2.70938e-19	46
COX5A	7.96209e-22	0.415548	0.963	0.542	1.02655e-17	46
PDCD5	1.28098e-36	0.41548	0.737	0.224	1.65156e-32	46
SMC1A	3.56876e-45	0.415091	0.626	0.15	4.6012e-41	46
GMNN	4.48399e-44	0.41158	0.505	0.109	5.78121e-40	46
ENSSSCG00000039582	2.74132e-23	0.410937	0.921	0.444	3.53438e-19	46
RAD21	1.31732e-30	0.410372	0.695	0.23	1.69842e-26	46
CDKN3	3.37123e-66	0.410024	0.316	0.029	4.34653e-62	46
CKAP2	2.7442e-128	0.407657	0.289	0.005	3.5381e-124	46
DYNLL1	1.31625e-22	0.407295	0.842	0.381	1.69704e-18	46
RACGAP1	7.55256e-85	0.407216	0.305	0.018	9.73752e-81	46
ASPM	2.2444e-100	0.406181	0.253	0.006	2.8937e-96	46
FBXO5	1.44588e-126	0.40594	0.274	0.004	1.86417e-122	46
PTMA	1.10713e-37	0.405278	1	1	1.42742e-33	46
CENPM	9.73498e-69	0.404115	0.405	0.048	1.25513e-64	46
CCT3	6.88016e-26	0.40372	0.842	0.35	8.87059e-22	46
ATAD5	5.95322e-66	0.40371	0.426	0.055	7.67549e-62	46
SSR4	3.53099e-19	0.402886	0.937	0.572	4.55251e-15	46
SLC25A5	1.49108e-21	0.402461	0.879	0.458	1.92245e-17	46
DBI	4.34777e-20	0.402281	0.937	0.554	5.60559e-16	46
DNAJC9	9.92437e-65	0.401398	0.495	0.075	1.27955e-60	46
ENSSSCG00000034527	6.62212e-29	0.399464	0.758	0.27	8.5379e-25	46
NPM1	2.18779e-11	0.39885	0.953	0.745	2.82072e-07	46
ENSSSCG00000000377	7.64576e-38	0.398632	0.637	0.174	9.85768e-34	46
ZNF367	3.83702e-105	0.398606	0.279	0.008	4.94707e-101	46
SARNP	2.01005e-40	0.397038	0.658	0.176	2.59155e-36	46
LSM8	3.37868e-29	0.396282	0.747	0.259	4.35613e-25	46
ENSSSCG00000000405	2.39293e-17	0.394521	0.905	0.586	3.0852e-13	46
HMGN3	3.31801e-22	0.394132	0.847	0.364	4.2779e-18	46
GAPDH	1.46995e-20	0.392683	0.989	0.887	1.89521e-16	46
MYBL2	1.00077e-95	0.392563	0.3	0.014	1.2903e-91	46
ENSSSCG00000001075	7.98125e-19	0.392061	0.842	0.417	1.02902e-14	46
KIF2C	3.85278e-128	0.390055	0.289	0.005	4.96739e-124	46
CCDC167	1.24829e-61	0.389577	0.447	0.065	1.60942e-57	46
PRDX3	1.65214e-35	0.389338	0.653	0.189	2.1301e-31	46
MCM5	1.19912e-99	0.388159	0.337	0.018	1.54603e-95	46
MICOS10	3.8934e-19	0.38773	0.947	0.569	5.01976e-15	46
NDUFS8	4.58818e-26	0.387627	0.842	0.326	5.91554e-22	46
NCAPH	8.59533e-108	0.386791	0.263	0.006	1.1082e-103	46
PIMREG	8.60768e-88	0.385334	0.205	0.004	1.10979e-83	46
SRSF2	2.12062e-18	0.385149	0.942	0.526	2.73411e-14	46
UCHL5	2.01066e-31	0.384225	0.647	0.201	2.59235e-27	46
ENSSSCG00000002550	3.08885e-18	0.383014	0.926	0.553	3.98246e-14	46
ENSSSCG00000032166	4.89975e-20	0.382197	0.863	0.405	6.31725e-16	46
SSRP1	9.83609e-35	0.381528	0.584	0.161	1.26817e-30	46
ENSSSCG00000033733	2.27278e-18	0.381402	0.968	0.596	2.9303e-14	46
PLP2	9.84882e-31	0.381333	0.568	0.17	1.26981e-26	46
PHF5A	4.51248e-30	0.378197	0.726	0.243	5.81794e-26	46
ENSSSCG00000016711	6.65457e-31	0.378074	0.726	0.239	8.57974e-27	46
GINS2	1.62371e-63	0.377351	0.363	0.042	2.09345e-59	46
CCT5	2.51146e-22	0.377154	0.805	0.34	3.23802e-18	46
ENSSSCG00000037071	5.49674e-41	0.377008	0.621	0.159	7.08695e-37	46
ENSSSCG00000036350	2.0241e-19	0.375559	0.995	0.87	2.60967e-15	46
UCHL3	6.00377e-51	0.372353	0.574	0.119	7.74066e-47	46
RFC2	2.80919e-30	0.371821	0.684	0.22	3.62189e-26	46
PSMA7	1.048e-16	0.370904	0.916	0.534	1.35119e-12	46
CACYBP	1.09728e-14	0.370515	0.889	0.563	1.41472e-10	46
NONO	1.04379e-29	0.370212	0.768	0.259	1.34575e-25	46
NDUFB6	6.67749e-38	0.369614	0.642	0.175	8.60929e-34	46
EIF4A1	7.78524e-13	0.36863	0.879	0.555	1.00375e-08	46
ENSSSCG00000012166	1.21385e-34	0.368325	0.653	0.19	1.56502e-30	46
PFN1	3.66209e-15	0.367776	0.989	0.794	4.72154e-11	46
COX5B	5.48463e-19	0.365461	0.974	0.672	7.07134e-15	46
CCDC34	3.07642e-80	0.363249	0.332	0.025	3.96642e-76	46
MANF	3.64466e-23	0.363041	0.747	0.301	4.69906e-19	46
PBK	4.45618e-105	0.3629	0.268	0.007	5.74536e-101	46
HIST1H1E	2.92364e-41	0.362146	0.432	0.086	3.76945e-37	46
ENSSSCG00000010795	2.34001e-27	0.362059	0.726	0.256	3.01698e-23	46
TMEM71	1.4748e-35	0.3572	0.263	0.041	1.90146e-31	46
COTL1	1.26015e-13	0.35652	0.905	0.575	1.62472e-09	46
ENSSSCG00000023323	3.74892e-46	0.356353	0.626	0.146	4.83348e-42	46
MND1	1.23794e-72	0.356302	0.332	0.029	1.59608e-68	46
PPIH	7.6526e-55	0.355687	0.595	0.117	9.8665e-51	46
NME2	1.10986e-13	0.355483	0.947	0.684	1.43094e-09	46
UQCR10	2.36307e-21	0.355307	0.837	0.354	3.04671e-17	46
PSMB7	1.96156e-25	0.351373	0.768	0.285	2.52904e-21	46
ISG20	3.55028e-22	0.351344	0.653	0.245	4.57738e-18	46
CHCHD5	3.75791e-38	0.348644	0.526	0.128	4.84508e-34	46
ENSSSCG00000004782	7.46476e-114	0.348592	0.232	0.002	9.62431e-110	46
CEP55	1.08212e-72	0.347961	0.211	0.008	1.39518e-68	46
ENSSSCG00000033697	4.19897e-14	0.347475	0.995	0.948	5.41373e-10	46
SNRPA1	8.46725e-28	0.347097	0.668	0.224	1.09168e-23	46
TPM3	4.715e-16	0.344767	0.968	0.726	6.07905e-12	46
COX17	9.00177e-16	0.344174	0.926	0.573	1.1606e-11	46
ENSSSCG00000038989	9.83969e-22	0.342885	0.521	0.18	1.26863e-17	46
ENSSSCG00000012811	2.90224e-34	0.342032	0.647	0.188	3.74185e-30	46
CCT8	1.92183e-29	0.34017	0.553	0.165	2.47782e-25	46
RAD51AP1	9.15619e-116	0.339949	0.258	0.004	1.18051e-111	46
MCM2	5.87262e-84	0.339307	0.295	0.017	7.57157e-80	46
MTHFD1	1.78806e-71	0.338757	0.384	0.04	2.30534e-67	46
PPID	1.65831e-42	0.338186	0.505	0.11	2.13806e-38	46
ND4	1.55274e-21	0.337438	0.995	0.977	2.00195e-17	46
IMP4	3.77955e-31	0.337218	0.611	0.181	4.87298e-27	46
ENSSSCG00000000002	3.90224e-111	0.336907	0.226	0.002	5.03115e-107	46
ENSSSCG00000009851	2.39701e-24	0.334582	0.758	0.286	3.09047e-20	46
KIF20A	6.50998e-99	0.334396	0.226	0.004	8.39332e-95	46
ENSSSCG00000020808	1.3995e-29	0.332258	0.621	0.193	1.80437e-25	46
ENSSSCG00000021560	7.60163e-20	0.331219	0.805	0.345	9.80079e-16	46
ACTB	1.73176e-11	0.330993	1	0.946	2.23276e-07	46
TPM4	2.19394e-30	0.330363	0.526	0.15	2.82865e-26	46
ENSSSCG00000034896	7.23333e-42	0.32993	0.516	0.114	9.32593e-38	46
PKM	3.54116e-13	0.329134	0.9	0.543	4.56562e-09	46
MDH2	2.59182e-29	0.326801	0.495	0.139	3.34164e-25	46
PTBP1	7.1346e-23	0.32496	0.763	0.296	9.19864e-19	46
BID	2.58988e-40	0.324918	0.537	0.126	3.33913e-36	46
ACADM	5.14113e-45	0.324508	0.579	0.13	6.62846e-41	46
PSMA4	1.07137e-22	0.324406	0.732	0.28	1.38132e-18	46
PPIL1	5.06116e-50	0.324114	0.416	0.069	6.52535e-46	46
RFC5	3.65254e-70	0.322877	0.405	0.046	4.70921e-66	46
HDGF	4.86298e-41	0.321397	0.537	0.123	6.26984e-37	46
EIF3I	1.35737e-14	0.320742	0.826	0.427	1.75006e-10	46
CTLA4	5.08166e-23	0.320431	0.758	0.294	6.55178e-19	46
ATP5PF	4.59265e-14	0.320296	0.947	0.562	5.9213e-10	46
NDUFA1	1.1358e-20	0.319959	0.826	0.342	1.46439e-16	46
IFI30	2.92898e-33	0.31686	0.553	0.152	3.77633e-29	46
ENSSSCG00000029066	4.36803e-37	0.316745	0.5	0.119	5.63171e-33	46
ENSSSCG00000039618	2.57363e-38	0.316134	0.416	0.086	3.31818e-34	46
ENSSSCG00000010517	8.24855e-18	0.315662	0.774	0.342	1.06349e-13	46
ENSSSCG00000027085	1.1349e-22	0.315526	0.668	0.25	1.46322e-18	46
NXT2	4.2533e-45	0.314865	0.368	0.06	5.48378e-41	46
S100A4	2.96817e-14	0.313679	0.311	0.107	3.82686e-10	46
RFESD	1.27622e-49	0.312176	0.337	0.046	1.64543e-45	46
CDC45	4.34769e-92	0.31171	0.284	0.013	5.60548e-88	46
SLIRP	1.19703e-30	0.311491	0.647	0.197	1.54333e-26	46
SELENOH	4.43988e-28	0.310229	0.589	0.183	5.72434e-24	46
ENSSSCG00000010320	5.88671e-18	0.310094	0.789	0.344	7.58974e-14	46
RNASEH2C	2.33923e-25	0.30978	0.721	0.254	3.01596e-21	46
CFL1	5.55457e-20	0.309564	1	0.935	7.1615e-16	46
CCT2	2.41573e-15	0.308949	0.811	0.404	3.1146e-11	46
PHB2	3.50593e-22	0.307767	0.695	0.259	4.52019e-18	46
ENSSSCG00000024313	6.8461e-18	0.307716	0.832	0.374	8.82668e-14	46
MSH6	3.03998e-33	0.307417	0.358	0.075	3.91945e-29	46
UQCRQ	1.15405e-16	0.306849	0.821	0.393	1.48792e-12	46
ENSSSCG00000037565	1.26649e-33	0.306514	0.321	0.061	1.63288e-29	46
ENSSSCG00000015710	2.75733e-13	0.306345	0.942	0.519	3.55502e-09	46
LBR	2.08905e-31	0.305828	0.637	0.189	2.69341e-27	46
NCAPD2	1.3442e-74	0.305219	0.221	0.009	1.73307e-70	46
ENSSSCG00000033212	3.05076e-20	0.305066	0.874	0.368	3.93334e-16	46
ENO1	9.2954e-13	0.304522	0.968	0.767	1.19846e-08	46
COX8A	5.34376e-18	0.303821	1	0.889	6.88971e-14	46
ENSSSCG00000038359	7.29141e-20	0.302143	0.637	0.245	9.40082e-16	46
NT5C	1.00468e-44	0.301668	0.442	0.084	1.29534e-40	46
BUB1	1.02159e-81	0.301323	0.205	0.005	1.31713e-77	46
NASP	1.40542e-40	0.299787	0.437	0.089	1.81201e-36	46
ENSSSCG00000011764	1.88479e-22	0.299733	0.721	0.27	2.43006e-18	46
HNRNPR	2.91244e-18	0.29946	0.816	0.351	3.75501e-14	46
UBE2S	3.85362e-49	0.29877	0.289	0.034	4.96847e-45	46
MRPL51	1.58549e-54	0.298721	0.353	0.046	2.04417e-50	46
ORC6	9.08892e-43	0.29826	0.368	0.063	1.17183e-38	46
NUDT21	1.06105e-26	0.297751	0.763	0.264	1.36801e-22	46
ENSSSCG00000004945	8.37475e-15	0.297417	0.995	0.866	1.07976e-10	46
ENSSSCG00000002449	5.26392e-27	0.295547	0.647	0.212	6.78677e-23	46
KNSTRN	7.34134e-49	0.295081	0.232	0.021	9.46519e-45	46
ENSSSCG00000015337	2.56829e-14	0.29459	0.979	0.678	3.3113e-10	46
NDUFC2	1.35646e-18	0.294567	0.832	0.357	1.74889e-14	46
GLRX3	1.29175e-29	0.294072	0.647	0.199	1.66545e-25	46
ENSSSCG00000012997	1.72937e-69	0.293741	0.353	0.034	2.22968e-65	46
ELOC	2.63531e-21	0.293548	0.774	0.302	3.3977e-17	46
PSMB8	2.66732e-12	0.291648	0.974	0.617	3.43897e-08	46
PFKP	8.15613e-37	0.291221	0.484	0.113	1.05157e-32	46
ENSSSCG00000006665	1.1555e-37	0.291177	0.553	0.136	1.48978e-33	46
ENSSSCG00000009145	6.15472e-25	0.29084	0.611	0.202	7.93529e-21	46
SUMO2	5.23358e-15	0.290264	0.995	0.788	6.74765e-11	46
ENSSSCG00000034853	1.22453e-29	0.290004	0.279	0.053	1.57879e-25	46
MRPL11	5.16115e-31	0.289334	0.616	0.181	6.65428e-27	46
MRPL20	5.78079e-25	0.289215	0.674	0.232	7.45317e-21	46
ACOT7	1.90312e-30	0.289173	0.521	0.143	2.4537e-26	46
RALY	2.65608e-20	0.289168	0.789	0.314	3.42449e-16	46
CDK2AP1	1.40416e-31	0.287237	0.426	0.103	1.81038e-27	46
EIF2S1	3.92157e-28	0.285452	0.505	0.145	5.05608e-24	46
CHCHD3	2.17488e-32	0.284632	0.558	0.152	2.80408e-28	46
TSPO	1.61391e-20	0.283692	0.532	0.189	2.08082e-16	46
VRK1	2.18597e-49	0.282161	0.395	0.063	2.81837e-45	46
ENSSSCG00000033700	2.54446e-37	0.281965	0.479	0.109	3.28058e-33	46
PLGRKT	7.7774e-26	0.28184	0.626	0.207	1.00274e-21	46
NCAPD3	2.99585e-58	0.281038	0.237	0.017	3.86256e-54	46
FANCI	7.10197e-64	0.280958	0.258	0.019	9.15657e-60	46
BATF	6.3894e-25	0.280585	0.658	0.225	8.23785e-21	46
RBMX	7.94927e-22	0.280504	0.753	0.287	1.0249e-17	46
CKAP5	3.04059e-45	0.280382	0.289	0.038	3.92024e-41	46
TPI1	8.44401e-13	0.279911	0.863	0.5	1.08869e-08	46
GGNBP2	3.90301e-36	0.279565	0.474	0.11	5.03216e-32	46
UQCRC2	2.86877e-32	0.279373	0.611	0.174	3.69871e-28	46
ENSSSCG00000002907	2.13967e-12	0.279204	0.953	0.629	2.75868e-08	46
HNRNPD	3.04252e-33	0.277198	0.584	0.159	3.92273e-29	46
ENSSSCG00000008183	2.97077e-43	0.276948	0.537	0.118	3.83021e-39	46
SNRNP40	1.09526e-34	0.276925	0.5	0.124	1.41212e-30	46
AKR1B1	1.5399e-27	0.276737	0.421	0.111	1.9854e-23	46
EIF2S2	3.96668e-16	0.276248	0.774	0.353	5.11424e-12	46
ENSSSCG00000012517	7.22245e-29	0.276056	0.563	0.167	9.3119e-25	46
SNRPC	1.89295e-21	0.2756	0.805	0.311	2.44058e-17	46
ZWILCH	6.27708e-68	0.275327	0.337	0.032	8.09304e-64	46
ENSSSCG00000029577	9.29096e-33	0.2747	0.4	0.09	1.19788e-28	46
ATP5MD	1.16511e-14	0.274376	0.905	0.456	1.50218e-10	46
NDUFA10	8.34973e-36	0.274005	0.479	0.113	1.07653e-31	46
ENSSSCG00000033068	5.67079e-12	0.273968	0.874	0.49	7.31135e-08	46
ARPC5	1.27108e-08	0.273751	0.916	0.563	0.00016388	46
CDCA5	4.78063e-83	0.273523	0.184	0.003	6.16366e-79	46
SPTSSA	5.41363e-44	0.273051	0.532	0.114	6.9798e-40	46
AHCY	6.55221e-52	0.272605	0.289	0.032	8.44777e-48	46
TOPBP1	1.66384e-54	0.272466	0.337	0.042	2.14519e-50	46
CENPS	1.22322e-61	0.272196	0.242	0.017	1.5771e-57	46
ARL6IP6	1.28717e-39	0.270858	0.458	0.097	1.65955e-35	46
IDH2	2.84065e-15	0.269972	0.821	0.375	3.66244e-11	46
ATP5PB	1.40883e-11	0.269627	0.921	0.579	1.8164e-07	46
FLNA	5.79528e-37	0.268771	0.253	0.036	7.47185e-33	46
GTF2H5	3.82782e-30	0.268622	0.653	0.198	4.93521e-26	46
CLTA	2.66898e-21	0.268081	0.695	0.259	3.44112e-17	46
CENPH	3.96055e-43	0.26762	0.295	0.041	5.10633e-39	46
COA3	1.83299e-28	0.266184	0.547	0.159	2.36328e-24	46
PHB	1.34415e-26	0.266003	0.642	0.207	1.73301e-22	46
DHX15	4.71195e-36	0.265994	0.447	0.1	6.07512e-32	46
ENSSSCG00000032003	3.18557e-13	0.265919	0.811	0.436	4.10716e-09	46
ENSSSCG00000002036	1.75725e-42	0.265805	0.542	0.121	2.26562e-38	46
ENSSSCG00000032067	1.70586e-48	0.265179	0.421	0.071	2.19937e-44	46
NDUFB11	3.74201e-22	0.264491	0.784	0.296	4.82458e-18	46
ENSSSCG00000039612	1.78708e-43	0.263915	0.505	0.106	2.30408e-39	46
S100A11	8.08121e-20	0.263851	0.421	0.138	1.04191e-15	46
NDUFC1	1.72417e-14	0.263766	0.879	0.423	2.22297e-10	46
ALYREF	7.99319e-39	0.263393	0.305	0.049	1.03056e-34	46
WDR1	7.58185e-15	0.263311	0.874	0.411	9.77528e-11	46
GPD1	3.37105e-24	0.263139	0.7	0.246	4.34629e-20	46
COX7B	8.82478e-13	0.262777	0.989	0.8	1.13778e-08	46
THYN1	7.65794e-25	0.262406	0.658	0.222	9.87339e-21	46
PSMB4	5.85637e-17	0.261968	0.832	0.365	7.55062e-13	46
ND3	2.77448e-11	0.261773	0.963	0.67	3.57714e-07	46
NEK2	3.14505e-78	0.261449	0.195	0.005	4.05491e-74	46
ENSSSCG00000038364	1.61777e-20	0.261441	0.716	0.272	2.08579e-16	46
GDI2	8.5347e-18	0.260883	0.732	0.297	1.10038e-13	46
MIS18A	2.87895e-79	0.260589	0.221	0.008	3.71183e-75	46
ENSSSCG00000017213	5.38533e-10	0.26046	0.926	0.604	6.9433e-06	46
ENSSSCG00000014296	1.52514e-35	0.260419	0.432	0.096	1.96637e-31	46
AKIP1	1.69441e-39	0.259557	0.353	0.062	2.18461e-35	46
NDUFA8	3.10893e-28	0.259317	0.516	0.147	4.00834e-24	46
YEATS4	3.25103e-39	0.259079	0.421	0.085	4.19155e-35	46
ENSSSCG00000031730	3.37298e-36	0.257798	0.395	0.081	4.34879e-32	46
HDAC2	4.27283e-32	0.257794	0.611	0.172	5.50896e-28	46
NOLC1	7.34082e-21	0.257201	0.532	0.183	9.46452e-17	46
TCP1	1.7194e-21	0.257195	0.632	0.227	2.21682e-17	46
TFDP1	2.3549e-35	0.256877	0.389	0.082	3.03618e-31	46
CDK2	4.94938e-55	0.256666	0.226	0.017	6.38123e-51	46
RNPS1	2.31843e-12	0.256597	0.789	0.394	2.98915e-08	46
ENSSSCG00000035908	2.66545e-48	0.256176	0.2	0.015	3.43657e-44	46
SEC11A	2.37945e-16	0.25464	0.821	0.357	3.06782e-12	46
ENSSSCG00000023595	4.46128e-38	0.25407	0.4	0.079	5.75193e-34	46
SMARCB1	4.67995e-34	0.25384	0.505	0.127	6.03386e-30	46
RPSA	9.4927e-14	0.253463	1	0.992	1.22389e-09	46
MRPL18	1.19706e-31	0.253246	0.458	0.113	1.54337e-27	46
ENSSSCG00000029857	8.19151e-22	0.252389	0.674	0.242	1.05613e-17	46
RAD23A	1.90887e-27	0.252059	0.542	0.16	2.46111e-23	46
NDUFB10	4.65953e-17	0.251839	0.805	0.345	6.00754e-13	46
ORC1	3.75383e-60	0.250752	0.253	0.019	4.83981e-56	46
ZNF207	3.87648e-37	0.250523	0.579	0.144	4.99795e-33	46
RPS20	1.04984e-17	-0.251945	1	1	1.35356e-13	46
ENSSSCG00000008170	4.92216e-14	-0.264774	1	0.99	6.34614e-10	46
RPS14	5.06375e-12	-0.269709	0.989	0.982	6.5287e-08	46
RPL37	3.31334e-19	-0.276024	1	0.999	4.27189e-15	46
ENSSSCG00000040273	1.94892e-22	-0.280798	1	0.999	2.51274e-18	46
HSD11B1L	7.65744e-20	-0.294289	1	0.995	9.87274e-16	46
SSR2	1.62911e-06	-0.296827	0.968	0.843	0.0210041	46
ENSSSCG00000013597	1.39564e-15	-0.312012	0.995	0.983	1.7994e-11	46
ENSSSCG00000038507	3.67274e-27	-0.318579	1	0.999	4.73526e-23	46
UBB	1.26984e-10	-0.322543	0.995	0.996	1.6372e-06	46
PTPRC	5.40517e-07	-0.33293	0.963	0.883	0.00696888	46
CD3E	4.73172e-09	-0.341219	0.974	0.914	6.10061e-05	46
SH3BGRL3	6.76638e-07	-0.341253	0.958	0.879	0.00872389	46
GZMB	2.23007e-06	-0.348994	0.137	0.285	0.0287523	46
TPT1	1.73774e-32	-0.353181	1	1	2.24047e-28	46
EIF1	5.12874e-13	-0.411465	1	0.992	6.61248e-09	46
ENSSSCG00000034448	7.15066e-33	-0.417514	1	1	9.21935e-29	46
ENSSSCG00000016758	1.52137e-09	-0.493852	0.968	0.835	1.9615e-05	46
ENSSSCG00000037885	1.97616e-10	-0.496354	0.963	0.93	2.54786e-06	46
RPS27	2.30406e-67	-0.518608	1	1	2.97062e-63	46
UBC	4.16355e-12	-0.54314	0.889	0.791	5.36806e-08	46
ENSSSCG00000001341	5.49656e-26	-0.552873	0.974	0.951	7.08671e-22	46
SRGN	3.05746e-20	-0.557996	0.995	0.99	3.94198e-16	46
CD2	7.92302e-13	-0.566191	0.937	0.818	1.02152e-08	46
ITM2B	4.85859e-14	-0.598039	0.811	0.764	6.26418e-10	46
LAPTM5	5.19421e-20	-0.604074	0.953	0.887	6.69689e-16	46
B2M	6.4386e-57	-0.610201	1	1	8.30129e-53	46
H3F3B	3.61084e-21	-0.619227	1	0.995	4.65546e-17	46
ENSSSCG00000001229	1.92277e-57	-0.637467	1	1	2.47903e-53	46
DDX5	1.08712e-27	-0.653361	0.979	0.941	1.40162e-23	46
CD37	1.12461e-06	-0.672967	0.589	0.539	0.0144995	46
SRSF5	3.153e-15	-0.756246	0.816	0.768	4.06516e-11	46
ID2	4.23106e-08	-0.758788	0.789	0.692	0.000545511	46
CREM	7.23728e-16	-0.784187	0.853	0.794	9.33102e-12	46
PNRC1	1.56357e-13	-0.790879	0.747	0.684	2.01591e-09	46
ENSSSCG00000033734	1.68391e-07	-0.790979	0.553	0.625	0.00217107	46
SAT1	2.04786e-36	-0.883914	0.963	0.967	2.64031e-32	46
IFI6	4.14375e-18	-0.903288	0.879	0.894	5.34254e-14	46
CD52	2.41156e-07	-0.936585	0.6	0.617	0.00310923	46
BTG1	2.84506e-53	-1.18297	0.963	0.975	3.66814e-49	46

## Sheet: topic_DGE
Gene	topic	LFC	pval	Zscore	newP
ENSSSCG00000031023	k1	-10.2689	504.129	-48.0978	0
PCLAF	k1	-9.59556	352.97	-40.22	0
DUT	k1	-9.4963	371.581	-41.271	0
ENSSSCG00000004970	k1	1.0465	733.866	58.0603	0
RPL35	k1	1.11142	351.877	40.1574	0
ENSSSCG00000003042	k1	1.10098	470.614	46.4664	0
ENSSSCG00000034448	k1	1.63213	1211.71	74.6394	0
RPS11	k1	1.07656	492.984	47.5615	0
STMN1	k1	-11.346	724.45	-57.6858	0
CD52	k1	8.71448	1654.57	87.2363	0
HMGN2	k1	-4.39993	914.229	-64.8181	0
IFI6	k1	2.2931	852.227	62.5773	0
LAPTM5	k1	2.52185	397.265	42.6792	0
ENSSSCG00000003930	k1	0.978185	431.542	44.4891	0
CKS2	k1	-9.47622	369.389	-41.1487	0
HMGB2	k1	-4.4376	869.113	-63.1955	0
RPLP0	k1	1.17909	517.633	48.7397	0
PTMA	k1	-1.05665	568.418	-51.0817	0
PDCD1	k1	-9.53666	348.05	-39.9375	0
HSPA8	k1	-1.90633	355.049	-40.3387	0
H2AFZ	k1	-6.94288	916.73	-64.9068	0
ACTB	k1	-1.81386	504.992	-48.1391	0
ENSSSCG00000036224	k1	-9.29202	356.392	-40.4153	0
TMSB10	k1	-0.979262	907.1	-64.5644	0
RPS20	k1	1.17446	710.69	57.1341	0
ENSSSCG00000036618	k1	8.0469	2313.1	103.163	0
RPS27	k1	1.12605	593.638	52.2058	0
ENSSSCG00000012119	k1	0.805042	756.012	58.9318	0
RPL10	k1	1.26503	710.754	57.1367	0
HIST1H2AB	k1	-11.7372	821.705	-61.4443	0
TUBB	k1	-9.99183	454.811	-45.677	0
LTB	k1	-4.17975	332.778	-39.0476	0
TUBA1B	k1	-6.98316	1466.75	-82.1303	0
GAPDH	k1	-2.42749	442.994	-45.0776	0
ENSSSCG00000009327	k1	-3.04735	466.76	-46.2751	0
TPT1	k1	1.06692	563.505	50.8599	0
RAE1	k1	-11.6496	812.93	-61.1147	0
ACTG1	k1	-1.39788	345.502	-39.7904	0
RPL23	k1	1.28063	541.343	49.8468	0
CCL5	k1	8.03439	865.547	63.0654	0
ENSSSCG00000035080	k1	1.10293	532.04	49.4154	0
ENSSSCG00000016737	k1	-1.79867	401.912	-42.929	0
ENSSSCG00000033734	k1	3.06076	721.506	57.5682	0
ENSSSCG00000031023	k2	17.7577	505.331	48.1553	0
PCLAF	k2	-9.74279	353.025	-40.2231	0
DUT	k2	-9.75799	376.681	-41.5544	0
B2M	k2	1.76418	1474.08	82.3354	0
ENSSSCG00000004945	k2	-9.21789	695.914	-56.5357	0
RTRAF	k2	-9.0755	374.347	-41.425	0
ENSSSCG00000005453	k2	-9.54167	380.276	-41.7531	0
RPSA	k2	-2.30237	480.554	-46.9561	0
ENSSSCG00000036114	k2	-9.68004	358.497	-40.535	0
ENSSSCG00000039460	k2	-2.69387	440.622	-44.9564	0
STMN1	k2	-10.8758	689.956	-56.2926	0
CD52	k2	-12.1695	1726.12	-89.1046	0
RACK1	k2	-3.76182	330.946	-38.9395	0
RPLP0	k2	-2.23239	604.546	-52.6845	0
SRGN	k2	2.7926	1111.92	71.4954	0
CXCR4	k2	5.7851	516.475	48.685	0
ENSSSCG00000033697	k2	-6.44205	1478.41	-82.4565	0
ENSSSCG00000036224	k2	6.61539	326.408	38.6704	0
TMSB10	k2	0.811978	423.935	44.0938	0
ENSSSCG00000036618	k2	-11.9928	2489.41	-107.025	0
SAT1	k2	3.18663	891.322	63.9994	0
SSR4	k2	-9.99271	493.635	-47.593	0
HIST1H2AB	k2	-12.2571	819.673	-61.3681	0
ENSSSCG00000001229	k2	1.97439	1504.14	83.1717	0
TUBB	k2	-9.78124	452.919	-45.5816	0
CD69	k2	5.05973	407.088	43.2056	0
BTG1	k2	3.13199	979.997	67.1133	0
RAE1	k2	4.41924	455.744	45.7239	0
H3F3B	k2	3.09871	2056.8	97.2745	0
EIF1	k2	2.31044	779.204	59.8308	0
ENSSSCG00000037885	k2	3.18305	1233.1	75.2964	0
PCLAF	k3	17.375	352.489	40.1924	0
DUT	k3	16.3036	376.361	41.5367	0
B2M	k3	-3.27257	3953.42	-134.892	0
ENSSSCG00000004970	k3	-0.739634	329.109	-38.8308	0
ENSSSCG00000038507	k3	-1.25974	375.818	-41.5067	0
ENSSSCG00000040273	k3	-1.15161	332.913	-39.0556	0
ENSSSCG00000003042	k3	-1.04633	365.632	-40.938	0
ENSSSCG00000034448	k3	-1.85137	1262.1	-76.178	0
RPS11	k3	-1.06244	416.327	-43.695	0
STMN1	k3	7.87205	683.389	56.0234	0
CD52	k3	-12.5268	1726.28	-89.1088	0
HMGN2	k3	2.95819	634.32	53.9696	0
IFI6	k3	-12.6214	4657.41	-146.416	0
LAPTM5	k3	-3.34339	425.064	-44.1527	0
ENSSSCG00000014565	k3	-1.5075	333.623	-39.0974	0
HMGB2	k3	3.68936	789.995	60.2446	0
SRGN	k3	-1.5385	330.272	-38.8997	0
H2AFZ	k3	3.97049	609.998	52.9222	0
ENSSSCG00000036224	k3	-9.70505	355.119	-40.3427	0
ID2	k3	-5.97761	334.59	-39.1543	0
RPS20	k3	-1.12932	584.173	-51.7868	0
ENSSSCG00000036618	k3	-12.8936	2495.01	-107.146	0
RPS27	k3	-2.16436	1660.86	-87.4023	0
ENSSSCG00000012119	k3	-0.994554	996.432	-67.6746	0
SAT1	k3	-5.60433	1163.68	-73.1429	0
RPL10	k3	-1.0173	398.097	-42.724	0
HIST1H2AB	k3	17.8202	822.218	61.4635	0
ENSSSCG00000001229	k3	-3.32751	3181.18	-120.995	0
TUBB	k3	17.0497	455.45	45.7092	0
ENSSSCG00000029160	k3	-10.0696	346.863	-39.869	0
TUBA1B	k3	4.14934	1000.06	67.7978	0
BTG1	k3	-12.3177	3286.45	-122.982	0
RPL37	k3	-1.21606	393.395	-42.47	0
ENSSSCG00000009327	k3	2.65901	432.352	44.531	0
TPT1	k3	-1.90136	1327.81	-78.1385	0
CREM	k3	-3.87894	390.165	-42.2946	0
ACTG1	k3	1.72397	566.337	50.9879	0
H3F3B	k3	-2.19794	1033.27	-68.9163	0
CCL5	k3	-10.9934	943.798	-65.8599	0
ENSSSCG00000035080	k3	-1.18072	532.908	-49.4558	0
ENSSSCG00000037885	k3	-2.24378	543.266	-49.9356	0
ENSSSCG00000016737	k3	1.91393	496.163	47.7151	0
ENSSSCG00000033734	k3	-12.8456	2219.99	-101.063	0
RAN	k3	3.09344	306.781	37.4844	1.65496e-307
RPL37	k1	0.997196	305.732	37.4199	1.85155e-306
ENSSSCG00000004489	k1	0.829906	302.146	37.1988	7.14801e-303
UBB	k3	-1.21788	301.896	-37.1833	1.27082e-302
ENSSSCG00000035768	k1	0.875116	297.52	36.9115	3.02243e-298
ENSSSCG00000004145	k2	-9.52811	297.234	-36.8937	5.83328e-298
RPL35	k3	-1.0983	296.716	-36.8614	1.92353e-297
ENSSSCG00000014569	k1	0.895395	291.29	36.5211	5.12378e-292
RPS15	k1	0.869518	283.897	36.0523	1.2674e-284
IL22	k3	-9.69726	283.191	-36.0073	6.44189e-284
ENSSSCG00000039544	k1	1.12134	282.395	35.9564	4.02508e-283
RPL23	k3	-0.969419	281.652	-35.9088	2.2274e-282
ENSSSCG00000036296	k1	0.989137	276.175	35.5561	6.67644e-277
HINT1	k1	-2.84627	274.123	-35.4231	7.53474e-275
EIF1	k3	-1.29409	273.728	-35.3974	1.86925e-274
ENSSSCG00000014540	k2	1.68848	273.312	35.3704	4.87687e-274
RPS12	k2	-1.24926	267.984	-35.0221	1.03803e-268
IFITM3	k1	2.71009	267.542	34.993	2.87367e-268
ENSSSCG00000003930	k3	-0.810557	263.992	-34.7588	1.0188e-264
B2M	k1	0.623099	262.879	34.6851	1.32171e-263
RPL7A	k2	-1.89994	260.403	-34.5205	3.95183e-261
RAN	k1	-3.04734	259.382	-34.4524	4.14658e-260
GZMB	k3	-9.51514	258.086	-34.3657	8.20966e-259
LAG3	k1	-8.87668	254.594	-34.1312	2.54458e-255
ENSSSCG00000004489	k2	-1.16668	253.217	-34.0382	6.06976e-254
ENSSSCG00000031088	k1	0.835992	253.082	34.0291	8.27575e-254
FOS	k2	4.87235	251.305	33.9087	4.9513e-252
GAPDH	k3	1.63522	247.818	33.6713	1.52058e-248
H3F3B	k1	-0.972724	246.15	-33.5572	7.08053e-247
GZMB	k1	7.57456	244.722	33.4591	1.89541e-245
SRGN	k1	-1.19433	242.593	-33.3124	2.55057e-243
RPL39	k1	0.898249	242.22	33.2866	6.02593e-243
RPS16	k3	-0.892242	240.441	-33.1634	3.62596e-241
ENSSSCG00000034617	k1	0.80613	239.146	33.0735	7.15094e-240
RPL11	k1	0.937899	237.152	32.9345	7.04974e-238
LTB	k2	3.15973	236.853	32.9136	1.4025e-237
HSPA8	k3	1.41246	234.807	32.7703	1.5589e-235
RPS15	k2	-1.23441	232.062	-32.577	8.67245e-233
HSD11B1L	k3	-1.11881	229.103	-32.3674	7.89752e-230
ENSSSCG00000014855	k1	0.863608	228.168	32.3009	6.79613e-229
ENSSSCG00000005453	k3	4.13544	227.354	32.2429	4.42918e-228
ENSSSCG00000024776	k3	3.72647	227.282	32.2377	5.2255e-228
RPS16	k1	0.810821	225.983	32.1449	1.03952e-226
RBM38	k1	-9.20219	225.566	-32.1151	2.71715e-226
FOS	k3	-5.36854	225.05	-32.0781	8.90277e-226
NPM1	k3	2.29318	224.751	32.0567	1.77333e-225
RPS18	k2	-1.43765	221.383	-31.8141	4.13666e-222
ENSSSCG00000039544	k3	-1.06691	220.782	-31.7705	1.65267e-221
ENSSSCG00000036350	k1	-2.03886	219.87	-31.7045	1.34815e-220
ENSSSCG00000028485	k3	1.79572	218.835	31.6293	1.46105e-219
DDX5	k2	2.07791	215.716	31.4016	1.9252e-216
ENSSSCG00000038507	k1	0.870667	212.769	31.185	1.70398e-213
ENSSSCG00000001341	k3	-2.27774	211.97	-31.126	1.07117e-212
PCNA	k1	-9.21309	211.3	-31.0765	5.01207e-212
ENSSSCG00000033721	k2	1.67299	210.729	31.0342	1.86617e-211
ENSSSCG00000008170	k3	-1.18804	209.581	-30.949	2.62177e-210
ENSSSCG00000004970	k2	-0.809907	207.541	-30.7969	2.87996e-208
ATP5MC3	k2	-9.00414	206.292	-30.7036	5.10132e-207
ENSSSCG00000003914	k1	-3.8774	204.135	-30.5416	7.31989e-205
ENSSSCG00000037775	k2	3.67148	202.335	30.4056	4.62804e-203
RPS4X	k2	-1.65261	202.229	-30.3976	5.90844e-203
CD69	k1	-3.9211	201.541	-30.3455	2.87932e-202
ID2	k2	2.87051	201.238	30.3225	5.78602e-202
ENSSSCG00000008170	k1	1.07657	201.018	30.3059	9.58992e-202
CXCR4	k1	-3.26043	199.026	-30.1543	9.41537e-200
SNRPD1	k2	-8.95742	198.161	-30.0883	6.90038e-199
IFITM3	k3	-3.05265	196.754	-29.9805	1.76357e-197
ENSSSCG00000040273	k1	0.827469	196.684	29.9752	2.069e-197
ENSSSCG00000013064	k2	-3.52742	196.611	-29.9695	2.45034e-197
COX1	k3	-0.768687	196.541	-29.9641	2.87836e-197
SLC25A6	k3	1.51878	196.402	29.9535	3.96023e-197
HSD11B1L	k1	0.965537	194.376	29.7975	4.20844e-195
PTMA	k2	0.778752	193.716	29.7465	1.92194e-194
UBE2C	k3	16.592	193.274	29.7123	5.32384e-194
UBE2C	k1	-9.116	193.063	-29.696	8.65236e-194
UBE2C	k2	-8.96509	191.713	-29.5913	1.93625e-192
ENSSSCG00000005453	k1	-4.05595	187.797	-29.2853	1.5958e-188
ENSSSCG00000031912	k3	-4.63325	187.696	-29.2774	2.01484e-188
RGCC	k2	4.09407	187.398	29.254	3.99755e-188
ENSSSCG00000024776	k1	-3.65728	187.365	-29.2514	4.31365e-188
ENSSSCG00000012961	k1	-2.30529	187.243	-29.2418	5.70912e-188
IFI6	k2	1.2882	186.742	29.2023	1.81285e-187
PDCD1	k2	4.40304	185.67	29.1178	2.13728e-186
ENSSSCG00000034617	k3	-0.741755	185.34	-29.0917	4.56579e-186
ACTB	k2	1.23138	185.018	29.0662	9.60297e-186
RPA3	k1	-9.01477	184.479	-29.0235	3.32249e-185
CKS2	k3	3.68918	183.96	28.9824	1.09629e-184
UBB	k2	1.12795	183.596	28.9535	2.53758e-184
HMGB2	k2	-4.03557	183.481	-28.9444	3.30006e-184
ENSSSCG00000037885	k1	-1.09404	182.123	-28.8363	7.52743e-183
COX7A2	k3	2.9059	181.729	28.8048	1.86565e-182
DDX5	k3	-1.88266	180.132	-28.677	7.38307e-181
TMSB10	k3	0.427634	179.966	28.6637	1.08073e-180
ERH	k3	3.85856	178.897	28.5778	1.26902e-179
SNRPE	k3	3.31495	177.228	28.4432	5.91242e-178
RPL3	k2	-1.99494	175.811	-28.3284	1.54426e-176
RANBP1	k2	-8.57409	175.078	-28.2689	8.34916e-176
RANBP1	k1	-7.46952	174.312	-28.2064	4.87501e-175
PKM	k1	-4.01012	174.024	-28.1829	9.46423e-175
ENSSSCG00000003914	k3	3.14856	173.612	28.1493	2.44181e-174
COX2	k3	-0.596005	172.654	-28.0709	2.22049e-173
RPL26	k1	0.854504	172.551	28.0625	2.81224e-173
ENSSSCG00000037775	k1	-3.78512	172.495	-28.0579	3.19529e-173
VMP1	k2	3.40905	172.408	28.0508	3.90422e-173
NPM1	k2	-3.70494	171.131	-27.9459	7.4e-172
ENSSSCG00000017239	k1	0.94855	170.54	27.8972	2.88311e-171
PCNA	k3	5.46079	169.418	27.8045	3.82295e-170
ENSSSCG00000014855	k3	-0.777561	169.134	-27.7811	7.33957e-170
ENSSSCG00000039046	k2	-2.15853	168.513	-27.7297	3.06553e-169
ENSSSCG00000013597	k1	1.09206	168.353	27.7163	4.43967e-169
ENSSSCG00000026064	k1	-8.81156	168.071	-27.6929	8.49861e-169
ZFP36L2	k3	-1.80974	167.549	-27.6495	2.82743e-168
ENSSSCG00000035520	k2	-6.21933	166.181	-27.5356	6.5846e-167
RPL34	k1	0.807074	166.124	27.5308	7.50768e-167
PFN1	k1	-2.01739	165.816	-27.505	1.52876e-166
SLC25A5	k1	-4.65035	165.447	-27.4742	3.57163e-166
RPL39	k3	-0.781212	165.249	-27.4576	5.64189e-166
H2AFV	k3	2.88198	164.869	27.4258	1.35099e-165
C15orf48	k2	-8.33002	164.816	-27.4213	1.52775e-165
RPS27	k2	0.728357	164.69	27.4107	2.04364e-165
PTMA	k3	0.548704	164.551	27.3991	2.81489e-165
ERH	k1	-4.03205	162.298	-27.2094	5.03124e-163
RPS5	k2	-1.58346	161.56	-27.1469	2.75474e-162
SMC4	k2	-8.35553	161.502	-27.142	3.14506e-162
RPL11	k3	-0.821516	160.183	-27.03	6.56797e-161
COX7A2	k1	-3.05763	159.516	-26.9732	3.04799e-160
RANBP1	k3	6.53748	158.719	26.9051	1.91204e-159
RPA3	k3	6.37856	157.939	26.8384	1.15209e-158
CACYBP	k1	-3.40695	157.515	-26.8021	3.05541e-158
CXCR4	k3	-3.06672	157.22	-26.7768	6.02353e-158
NME2	k2	-5.27897	156.523	-26.7169	2.99776e-157
H2AFV	k1	-2.9988	156.382	-26.7047	4.14848e-157
ENO1	k3	1.86845	155.689	26.645	2.0476e-156
ENSSSCG00000037081	k1	-2.84326	155.543	-26.6324	2.86186e-156
NUCKS1	k1	-4.92879	155.465	-26.6256	3.42691e-156
SRSF5	k3	-2.63133	155.153	-26.5987	7.03282e-156
PSMB1	k1	-4.58066	155.047	-26.5896	8.96423e-156
ENSSSCG00000035768	k3	-0.663734	154.943	-26.5805	1.14026e-155
RAC2	k2	1.50331	154.106	26.508	7.83353e-155
HMGN3	k1	-6.32014	152.724	-26.3878	1.88929e-153
ENSSSCG00000014569	k2	-0.970222	152.59	-26.3762	2.56842e-153
ENO1	k1	-1.90806	152.295	-26.3505	5.0649e-153
ENSSSCG00000039740	k3	-0.871797	151.942	-26.3197	1.14224e-152
RPL17-C18orf32	k1	0.859568	151.941	26.3196	1.14491e-152
RPL34	k3	-0.809816	151.124	-26.2481	7.51307e-152
BATF	k1	-8.5985	150.919	-26.2301	1.20428e-151
RPS17	k1	0.673104	150.123	26.1603	7.52945e-151
RPS23	k2	-1.29131	149.57	-26.1116	2.69267e-150
PNRC1	k2	3.42415	149.424	26.0988	3.76531e-150
ENSSSCG00000013597	k3	-1.08052	149.292	-26.0871	5.10461e-150
ENSSSCG00000020830	k1	1.00662	149.247	26.0831	5.6669e-150
ENSSSCG00000036296	k3	-0.762828	147.939	-25.9676	1.1519e-148
ENSSSCG00000012961	k3	1.89023	147.552	25.9333	2.80298e-148
ENSSSCG00000029830	k2	-1.12256	147.154	-25.898	7.01585e-148
NANS	k1	-8.4815	147.035	-25.8875	9.22015e-148
HSPE1	k3	1.54648	145.935	25.7895	1.16255e-146
GYPC	k1	-6.45581	143.569	-25.5777	2.70022e-144
ENSSSCG00000011272	k1	0.823775	143.406	25.5631	3.92451e-144
CREM	k2	1.92798	143.014	25.5278	9.67691e-144
RPL10	k2	-0.834164	142.107	-25.446	7.81952e-143
RPS9	k1	0.815473	141.504	25.3915	3.1303e-142
SLC25A6	k2	-2.14516	141.302	-25.3732	4.98702e-142
ATP5MC3	k3	4.64799	140.207	25.2737	6.21173e-141
ENSSSCG00000029830	k1	0.70774	139.048	25.1681	8.95999e-140
SNRPD1	k3	4.60915	138.761	25.1419	1.73283e-139
ENSSSCG00000039071	k3	3.24488	138.349	25.1042	4.479e-139
ENSSSCG00000016902	k3	-8.43632	136.07	-24.8946	8.50575e-137
CTLA4	k1	-8.02688	135.831	-24.8725	1.47663e-136
RPS12	k1	0.584865	134.614	24.7598	2.43384e-135
ATP5MC1	k3	3.49214	134.251	24.726	5.61649e-135
PSMA7	k1	-3.59379	134.202	-24.7215	6.27901e-135
CORO1A	k3	1.66058	133.979	24.7007	1.05038e-134
ATP5F1A	k3	2.96491	133.9	24.6934	1.25887e-134
ENSSSCG00000024776	k2	-4.24568	133.86	-24.6897	1.38017e-134
ENSSSCG00000017239	k3	-0.905669	133.712	-24.6759	1.94205e-134
ENSSSCG00000029160	k2	3.75622	133.314	24.6388	4.85601e-134
SLC25A5	k3	3.36222	130.483	24.3732	3.28975e-131
ZFP36L1	k2	2.59082	130.233	24.3497	5.84444e-131
ATP5MC1	k1	-3.82124	129.932	-24.3212	1.16886e-130
ENSSSCG00000036716	k1	0.763594	128.334	24.1697	4.63068e-129
PSMB1	k3	3.46902	127.899	24.1283	1.26243e-128
EEF1B2	k1	1.24283	127.768	24.1158	1.70796e-128
SNRPD1	k1	-4.44521	127.701	-24.1094	1.98994e-128
EIF4A1	k3	2.66373	126.592	24.0035	2.55863e-127
ENSSSCG00000039460	k1	0.792976	126.53	23.9975	2.9542e-127
ENSSSCG00000037141	k3	-8.44919	126.461	-23.9909	3.45679e-127
CD3E	k2	1.78168	126.278	23.9734	5.27301e-127
ENSSSCG00000037141	k2	15.1886	125.939	23.9409	1.14983e-126
ENSSSCG00000001341	k2	1.70061	125.036	23.854	9.19577e-126
RPS26	k1	0.674047	124.598	23.8118	2.52259e-125
CD69	k3	-2.8747	124.598	-23.8117	2.52588e-125
RPL9	k1	0.717975	124.177	23.7711	6.65113e-125
ENSSSCG00000016902	k1	6.49069	122.973	23.6544	1.06303e-123
ENSSSCG00000037141	k1	-8.18997	122.51	-23.6094	3.08889e-123
RPL7A	k1	0.778549	122.092	23.5686	8.08923e-123
ATP5MC3	k1	-4.55442	122.036	-23.5632	9.19762e-123
EEF1B2	k2	-2.07597	122.02	-23.5616	9.54143e-123
RPS23	k1	0.746074	121.911	23.5509	1.22822e-122
ENSSSCG00000026064	k3	4.98698	121.848	23.5448	1.41787e-122
OAZ1	k1	-1.13403	121.643	-23.5248	2.27266e-122
ENSSSCG00000000405	k3	2.61207	121.309	23.4922	4.90643e-122
CORO1A	k1	-1.75299	121.083	-23.47	8.26899e-122
HSPD1	k1	-3.55686	120.887	-23.4508	1.29845e-121
ENSSSCG00000037602	k1	-3.18635	120.589	-23.4216	2.5778e-121
ENSSSCG00000035811	k1	0.607938	120.161	23.3795	6.90597e-121
SNRPF	k3	4.38989	119.63	23.3273	2.34176e-120
HSPD1	k3	2.98648	118.635	23.229	2.31772e-119
PTPRC	k2	1.85873	118.376	23.2034	4.20871e-119
ENSSSCG00000014565	k2	0.985183	117.708	23.1372	1.95693e-118
NUCKS1	k3	3.85003	117.673	23.1336	2.12389e-118
EIF1	k1	-0.80011	116.876	-23.0544	1.32992e-117
ENSSSCG00000016758	k3	-1.74343	116.584	-23.0252	2.6073e-117
SMC4	k1	-4.96163	115.717	-22.9385	1.92032e-116
RPL23	k2	-0.855146	115.709	-22.9377	1.95413e-116
HSPB1	k2	2.05283	115.343	22.9011	4.5348e-116
KARS	k2	-7.83613	115.23	-22.8896	5.89509e-116
TUBA4A	k1	-7.46564	114.916	-22.8581	1.21337e-115
ACTB	k3	0.80157	114.885	22.855	1.30331e-115
PPP1R15A	k2	4.71508	114.826	22.849	1.49432e-115
ENSSSCG00000031088	k2	-0.822791	114.14	-22.7799	7.25245e-115
TYMS	k2	-7.94809	113.973	-22.7631	1.06368e-114
SNRPE	k1	-2.68414	113.852	-22.7509	1.40543e-114
NME2	k3	1.8633	113.792	22.7448	1.61562e-114
NDUFS8	k2	-7.82878	113.642	-22.7297	2.27815e-114
ENSSSCG00000033721	k3	-1.12816	113.158	-22.6807	6.95172e-114
SMC4	k3	4.27105	112.713	22.6355	1.93637e-113
LAG3	k2	3.54058	112.549	22.6188	2.82793e-113
ACTG1	k2	-1.09485	112.44	-22.6078	3.62858e-113
ENSSSCG00000013889	k2	-1.00521	111.995	-22.5625	1.01271e-112
PLAC8	k1	2.3007	111.808	22.5435	1.55634e-112
CTSW	k2	-7.95761	110.083	-22.367	8.25109e-111
COX5B	k3	2.09788	109.934	22.3517	1.16351e-110
COX2	k2	0.574178	109.691	22.3266	2.03838e-110
ENSSSCG00000014540	k3	-0.940082	109.67	-22.3245	2.13597e-110
DBI	k3	2.63734	109.36	22.2926	4.36226e-110
ENSSSCG00000000405	k1	-2.53552	109.059	-22.2615	8.72071e-110
CD2	k3	-1.97907	107.548	-22.105	2.83071e-108
PSMA7	k3	2.82947	107.492	22.0992	3.21759e-108
CTSW	k1	10.617	106.942	22.0419	1.14272e-107
PSMB2	k3	3.15612	106.893	22.0368	1.27906e-107
POMP	k3	3.18306	106.863	22.0336	1.37164e-107
TYMS	k1	-7.96337	106.405	-21.9858	3.93529e-107
ILF2	k2	-7.7879	105.589	-21.9004	2.57598e-106
ENSSSCG00000028485	k2	-2.11212	105.433	-21.884	3.69134e-106
ENSSSCG00000028485	k1	-1.26632	105.422	-21.8828	3.78694e-106
ENSSSCG00000036350	k3	1.30919	105.274	21.8673	5.32086e-106
CFL1	k1	-1.0953	105.114	-21.8505	7.69482e-106
TOP2A	k3	15.3603	105.073	21.8461	8.45953e-106
TOP2A	k1	-8.22543	105.047	-21.8435	8.97044e-106
DNAJA1	k1	-2.43762	104.058	-21.7391	8.75502e-105
ENSSSCG00000017509	k1	0.722828	103.598	21.6905	2.52097e-104
VMP1	k1	-2.77083	103.57	-21.6875	2.69024e-104
PKM	k3	2.49089	103.331	21.6622	4.66295e-104
NPM1	k1	-1.57827	103.239	-21.6524	5.7656e-104
PNRC1	k3	-3.39021	102.979	-21.6248	1.05012e-103
ERH	k2	-4.44409	102.64	-21.5888	2.29055e-103
ENSSSCG00000001229	k1	0.43328	102.312	21.5538	4.87514e-103
CKS1B	k3	15.4849	101.301	21.4457	5.00476e-102
CKS1B	k1	-8.16734	101.29	-21.4446	5.12398e-102
TPM3	k3	1.71303	101.021	21.4158	9.52153e-102
SNRPF	k1	-4.38559	100.682	-21.3794	2.07789e-101
SNRPF	k2	-6.01087	100.429	-21.3521	3.72463e-101
NANS	k3	4.53198	100.229	21.3307	5.89776e-101
FABP3	k3	15.375	100.188	21.3262	6.48786e-101
FABP3	k1	-8.14935	100.185	-21.3259	6.53461e-101
TPI1	k1	-3.17679	99.8547	-21.2903	1.39739e-100
FABP3	k2	-7.90201	99.8237	-21.2869	1.50068e-100
CKS1B	k2	-7.80674	99.4074	-21.2419	3.91414e-100
ITM2B	k3	-2.73253	99.3757	-21.2385	4.20996e-100
NME1	k3	13.6808	99.3515	21.2359	4.4519e-100
TOP2A	k2	-7.65985	99.0881	-21.2074	8.16358e-100
ENSSSCG00000011952	k2	-1.40974	99.043	-21.2025	9.05766e-100
NME1	k1	-8.06304	98.8617	-21.1828	1.37505e-99
NME1	k2	-7.85934	98.6611	-21.1611	2.18213e-99
RPS14	k1	0.842366	98.4852	21.142	3.27166e-99
RPS9	k2	-1.03893	98.2284	-21.114	5.9102e-99
ENSSSCG00000013889	k1	0.630534	98.0492	21.0945	8.92986e-99
SRSF5	k2	1.93297	97.6464	21.0506	2.25733e-98
ATP5F1A	k1	-2.60712	97.1041	-20.9913	7.86911e-98
TPM3	k1	-1.78604	96.8736	-20.9661	1.33794e-97
YWHAB	k1	-2.32363	96.5829	-20.9342	2.61302e-97
CACYBP	k3	2.17338	96.5708	20.9329	2.68632e-97
TUBB4B	k1	-8.07719	96.4154	-20.9158	3.84229e-97
LSM2	k1	-8.04574	96.2241	-20.8948	5.96867e-97
BIRC5	k1	-8.06823	95.76	-20.8437	1.73785e-96
BIRC5	k3	15.5924	95.7422	20.8418	1.81058e-96
BIRC5	k2	-7.90457	95.6704	-20.8339	2.13576e-96
MICOS10	k3	2.4616	95.6619	20.8329	2.17838e-96
SRSF7	k1	-4.57861	95.6364	-20.8301	2.30978e-96
SNRPD3	k1	-7.90332	95.6106	-20.8273	2.45107e-96
NANS	k2	-7.1589	95.4128	-20.8054	3.86584e-96
PPP1R15A	k3	-6.64776	95.4107	-20.8052	3.88428e-96
IL22	k2	3.53587	95.0466	20.7649	8.98318e-96
DBI	k1	-2.58174	94.9413	-20.7533	1.14483e-95
ENSSSCG00000034527	k2	-7.8502	94.8553	-20.7438	1.39546e-95
PSMB8	k1	-2.31346	94.15	-20.6655	7.0794e-95
TPT1	k2	0.562462	94.1373	20.6641	7.28959e-95
ENSSSCG00000040857	k3	2.81857	93.923	20.6403	1.19406e-94
MDH1	k2	-7.79322	93.5852	-20.6026	2.59909e-94
ENSSSCG00000014031	k2	-7.70351	93.569	-20.6008	2.69788e-94
ENSSSCG00000002550	k3	2.37482	93.4572	20.5884	3.48962e-94
NAP1L1	k1	-1.92243	92.9774	-20.5348	1.05332e-93
AP2S1	k2	-7.63642	92.1057	-20.437	7.84055e-93
TUBB4B	k3	7.73514	92.0682	20.4328	8.54612e-93
DUSP1	k2	5.36222	91.9539	20.4199	1.11186e-92
ENSSSCG00000015337	k3	1.94306	91.6212	20.3825	2.39245e-92
ENSSSCG00000031023	k3	-2.9128	91.4983	-20.3686	3.17437e-92
ENSSSCG00000039582	k3	3.241	91.4823	20.3668	3.29397e-92
TPI1	k3	2.68277	91.3623	20.3533	4.34188e-92
CTSC	k1	1.39892	91.3239	20.3489	4.74362e-92
EIF4A1	k1	-2.35012	90.909	-20.3021	1.23321e-91
PSMB2	k1	-3.27365	90.5497	-20.2614	2.82053e-91
COX5A	k3	2.48661	90.4921	20.2548	3.22048e-91
ENSSSCG00000024974	k2	-1.05823	90.1988	-20.2215	6.32712e-91
CTSC	k3	-1.51859	89.5305	-20.1455	2.94751e-90
ENSSSCG00000039071	k1	-2.76423	89.513	-20.1435	3.06889e-90
CFL1	k3	0.984292	89.4371	20.1348	3.65552e-90
NDUFB7	k2	-7.64917	89.0711	-20.093	8.4903e-90
CYTB	k3	0.886494	89.0235	20.0876	9.47309e-90
CALM3	k1	-4.06995	88.449	-20.0218	3.55671e-89
KXD1	k3	-0.646599	87.9796	-19.9679	1.04812e-88
SIVA1	k2	-7.87181	87.8465	-19.9526	1.42396e-88
CD3G	k2	1.734	87.3097	19.8907	4.90101e-88
TYMS	k3	5.18225	87.1453	19.8717	7.15705e-88
ENSSSCG00000030295	k1	-4.83543	87.0719	-19.8632	8.47435e-88
ENSSSCG00000040857	k1	-2.9408	86.6882	-19.8188	2.0502e-87
UQCRQ	k1	-4.21362	86.5377	-19.8013	2.89909e-87
ENSSSCG00000032556	k1	-1.81654	86.5163	-19.7989	3.04556e-87
PSMA4	k2	-7.60949	86.2275	-19.7653	5.92233e-87
VIM	k3	3.14119	85.062	19.6294	8.66902e-86
EZR	k1	-3.75806	84.9497	-19.6163	1.12285e-85
ACP1	k2	-6.90215	84.9303	-19.614	1.17406e-85
SH2D1A	k1	-4.83081	83.6438	-19.4628	2.27096e-84
ENSSSCG00000038351	k1	-3.46019	83.6064	-19.4584	2.47533e-84
CALM3	k3	3.7977	83.548	19.4515	2.83133e-84
SRSF2	k3	2.31851	83.4189	19.4362	3.81147e-84
RPL6	k1	0.566135	82.7248	19.354	1.88437e-83
ENSSSCG00000035209	k1	-7.72795	82.6622	-19.3466	2.17695e-83
PSMB8	k3	2.01363	82.0743	19.2767	8.42788e-83
PTPRCAP	k2	1.64628	81.9047	19.2565	1.24549e-82
COX5B	k1	-1.91577	81.7191	-19.2343	1.90924e-82
ENSSSCG00000016100	k1	-5.39966	81.4063	-19.197	3.92374e-82
SNRPD3	k3	5.72494	81.4024	19.1965	3.95937e-82
RPS5	k1	0.709412	81.1941	19.1716	6.39595e-82
ENSSSCG00000030295	k3	4.02965	80.9512	19.1424	1.11897e-81
ENSSSCG00000002907	k3	2.02178	80.6002	19.1003	2.51048e-81
ENSSSCG00000039071	k2	-3.81272	80.3953	-19.0756	4.02415e-81
ENSSSCG00000031912	k1	-2.25952	80.2308	-19.0558	5.87739e-81
PLAC8	k3	-2.36594	80.1961	-19.0516	6.36636e-81
CYTB	k1	-0.843509	80.1877	-19.0506	6.49091e-81
SIVA1	k1	-7.41353	80.1496	-19.046	7.08548e-81
ENSSSCG00000017509	k2	-0.937247	80.0898	-19.0388	8.13178e-81
ENSSSCG00000033697	k3	0.687757	80.0833	19.0381	8.25415e-81
ENSSSCG00000014569	k3	-0.486273	80.0741	-19.0369	8.43125e-81
ILF2	k3	4.92587	79.8936	19.0152	1.27749e-80
RPS3A	k2	-0.784763	79.7035	-18.9922	1.97934e-80
ENSSSCG00000031088	k3	-0.489009	79.6306	-18.9834	2.34095e-80
EIF3I	k3	2.39202	79.6181	18.9819	2.40959e-80
ENSSSCG00000029857	k2	-7.8267	79.5961	-18.9792	2.53474e-80
ENSSSCG00000029596	k2	-7.68515	79.5881	-18.9782	2.58142e-80
RPL26	k3	-0.60059	79.3855	-18.9537	4.11648e-80
ISG15	k2	1.5392	79.2395	18.936	5.7607e-80
ILF2	k1	-4.85859	78.7437	-18.8758	1.80424e-79
SIVA1	k3	7.41521	78.7329	18.8745	1.84962e-79
LSM2	k3	6.42999	78.7182	18.8727	1.91325e-79
SMC2	k2	-7.84642	78.4984	-18.8459	3.17403e-79
RPS14	k3	-0.793111	78.2704	-18.8181	5.36507e-79
SMC2	k1	-7.59694	78.0666	-18.7932	8.57779e-79
MANF	k1	-4.55991	77.7861	-18.7589	1.63651e-78
ENSSSCG00000013366	k1	-2.2537	77.6357	-18.7405	2.31351e-78
EEF2	k2	-2.26696	77.5058	-18.7246	3.12032e-78
SRSF2	k1	-2.36055	77.2026	-18.6874	6.2717e-78
RGCC	k1	-2.47838	77.1748	-18.684	6.68577e-78
ATF4	k1	-2.23127	76.8545	-18.6446	1.39801e-77
ISG15	k3	-1.4177	76.8168	-18.6399	1.52491e-77
ENSSSCG00000035209	k3	7.67697	76.7746	18.6347	1.68039e-77
ATP5PF	k3	2.23747	76.633	18.6173	2.32788e-77
POMP	k1	-2.86504	76.4703	-18.5972	3.38644e-77
RPS10-NUDT3	k2	-1.41718	76.3989	-18.5884	3.99161e-77
RPL10A	k2	-7.72698	76.3594	-18.5835	4.37094e-77
ENSSSCG00000035209	k2	-7.48158	76.3449	-18.5817	4.51956e-77
NDUFV2	k1	-7.34621	75.873	-18.5233	1.33955e-76
RGS1	k2	1.76539	75.8324	18.5183	1.47104e-76
ACP1	k3	3.97778	75.7936	18.5135	1.60825e-76
COX1	k1	0.441243	75.6826	18.4997	2.07681e-76
NDUFB10	k2	-7.06788	75.3711	-18.461	4.25491e-76
RPL27	k2	-1.47569	75.3186	-18.4545	4.80141e-76
EIF3L	k2	-7.65742	75.1739	-18.4364	6.70049e-76
MICOS10	k1	-2.36836	74.6703	-18.3736	2.13652e-75
GPX1	k2	-4.43942	74.6683	-18.3734	2.14616e-75
YWHAQ	k1	-6.3097	74.3724	-18.3364	4.24239e-75
HSPE1	k1	-1.11796	74.1818	-18.3125	6.57908e-75
UBC	k2	2.04953	73.8935	18.2763	1.27782e-74
COX17	k3	1.805	73.7839	18.2625	1.64486e-74
SSR4	k3	1.85434	73.6627	18.2473	2.17419e-74
ENSSSCG00000033068	k3	2.64297	73.5813	18.237	2.62257e-74
ENSSSCG00000025928	k1	0.674493	73.3174	18.2038	4.81511e-74
MIF	k1	-1.28998	73.1105	-18.1777	7.75351e-74
NFKBIA	k2	2.30326	73.0663	18.1721	8.58476e-74
ENSSSCG00000025928	k2	-1.0008	72.5723	-18.1096	2.67704e-73
HINT1	k2	1.52995	72.3078	18.076	4.92216e-73
LGMN	k2	2.58153	72.2123	18.0639	6.13339e-73
ENSSSCG00000010517	k3	3.68126	72.1652	18.0579	6.83658e-73
ENSSSCG00000033068	k1	-2.83262	72.1048	-18.0502	7.85565e-73
CCT3	k1	-3.83305	72.0595	-18.0445	8.72019e-73
ENSSSCG00000034314	k1	-6.05382	72.0034	-18.0373	9.92233e-73
SMC2	k3	7.10479	71.9234	18.0271	1.19287e-72
RPS17	k2	-0.670152	71.8451	-18.0172	1.42851e-72
ENSSSCG00000034019	k1	-2.10021	71.4	-17.9604	3.98081e-72
GLIPR2	k2	-7.74135	71.3853	-17.9585	4.11817e-72
ENSSSCG00000015710	k3	2.33443	71.3143	17.9494	4.84916e-72
ENSSSCG00000017213	k1	-2.17397	71.0579	-17.9166	8.75205e-72
RPS3A	k1	0.503751	71.0565	17.9164	8.78111e-72
ATP5PB	k3	2.18201	71.0005	17.9092	9.988e-72
ENSSSCG00000002550	k1	-2.2326	70.7943	-17.8828	1.6057e-71
CCT4	k1	-3.42819	70.7625	-17.8787	1.72794e-71
ENSSSCG00000037030	k2	-0.874728	70.3207	-17.8219	4.77835e-71
RPLP2	k1	0.560743	70.2897	17.8179	5.13225e-71
PHB2	k2	-7.48026	70.2651	-17.8147	5.43149e-71
ENSSSCG00000015337	k1	-1.77946	70.0788	-17.7907	8.34142e-71
ENSSSCG00000004945	k3	0.985678	70.0471	17.7866	8.97321e-71
IFNG	k1	-4.08468	69.8713	-17.7639	1.34485e-70
HSPA5	k1	-1.55715	69.7126	-17.7434	1.93805e-70
GPR183	k3	-2.51877	69.7041	-17.7423	1.97674e-70
RGS1	k3	-1.52896	69.6167	-17.731	2.41713e-70
ENSSSCG00000039582	k1	-3.06431	69.5216	-17.7187	3.00914e-70
ENSSSCG00000034072	k1	-2.97696	69.4373	-17.7078	3.65303e-70
SMC3	k1	-4.08881	69.1292	-17.6678	7.42699e-70
ENSSSCG00000033733	k3	1.82667	69.0551	17.6581	8.808e-70
ENSSSCG00000016758	k1	1.20636	69.0493	17.6574	8.92736e-70
DYNLL1	k1	-3.2534	68.9085	-17.6391	1.2344e-69
TK1	k1	-7.37119	68.9079	-17.639	1.23619e-69
TK1	k2	-7.72739	68.8778	-17.6351	1.32501e-69
ENSSSCG00000034019	k3	1.8895	68.8573	17.6324	1.38891e-69
CCT3	k3	3.33065	68.85	17.6315	1.4124e-69
UQCRQ	k3	3.20113	68.7576	17.6194	1.74743e-69
TK1	k3	15.2472	68.6998	17.6119	1.99628e-69
CCT5	k3	3.66783	68.6967	17.6115	2.01054e-69
SH3BGRL3	k2	1.42327	68.6949	17.6113	2.01883e-69
MIF	k3	1.26411	68.5207	17.5885	3.01519e-69
ENSSSCG00000010795	k2	-7.63526	68.3039	-17.5602	4.96709e-69
ENSSSCG00000038351	k2	2.7575	68.2773	17.5568	5.28096e-69
ENSSSCG00000031117	k2	-7.78424	68.2114	-17.5481	6.14663e-69
HMGN3	k3	3.08281	68.1191	17.5361	7.60182e-69
NOP53	k2	-7.06708	67.6632	-17.4763	2.17161e-68
HINT1	k3	1.26237	67.6498	17.4745	2.23978e-68
ENSSSCG00000031117	k3	14.1076	67.5916	17.4669	2.5611e-68
MRPL12	k2	-7.65841	67.4427	-17.4473	3.60848e-68
HNRNPM	k1	-2.85952	67.3157	-17.4306	4.83338e-68
ENSSSCG00000010203	k1	-1.78797	67.2997	-17.4285	5.01477e-68
ENSSSCG00000038989	k2	-7.20572	67.2962	-17.428	5.056e-68
SUMO2	k3	1.33759	67.2176	17.4177	6.05908e-68
ENSSSCG00000031117	k1	-7.26534	67.0433	-17.3947	9.05176e-68
ENSSSCG00000009303	k2	-0.835577	67.0006	-17.3891	9.98565e-68
NAP1L1	k3	1.51607	66.8483	17.3689	1.41806e-67
ENSSSCG00000016100	k3	4.4259	66.813	17.3643	1.53828e-67
MDH1	k3	4.72999	66.5628	17.3312	2.73626e-67
ENSSSCG00000039740	k1	0.536531	66.4227	17.3126	3.77864e-67
VIM	k1	-2.88652	66.3013	-17.2965	4.99646e-67
MDH1	k1	-4.88732	66.2243	-17.2863	5.9663e-67
CTSW	k3	-6.92979	66.1432	-17.2755	7.1918e-67
HNRNPM	k3	2.62637	66.1124	17.2714	7.7205e-67
ARHGDIA	k3	3.7788	65.6852	17.2146	2.06454e-66
CYCS	k1	-2.31045	65.5409	-17.1953	2.87784e-66
RAN	k2	-2.15099	65.5341	-17.1944	2.92345e-66
PSMA6	k3	2.81148	65.4345	17.1811	3.67686e-66
SUMO2	k1	-1.38663	65.3235	-17.1663	4.74737e-66
ATP5PF	k1	-2.18636	64.8324	-17.1005	1.47109e-65
ENSSSCG00000005656	k3	2.30977	64.7818	17.0937	1.65264e-65
NPM3	k2	-7.75447	64.7643	-17.0914	1.72071e-65
IL7R	k1	12.0136	64.5044	17.0564	3.13039e-65
ZFP36L2	k1	1.01772	64.4874	17.0542	3.25522e-65
IL7R	k3	-7.6598	64.4565	-17.05	3.49562e-65
TPX2	k1	-7.27664	64.4559	-17.0499	3.49996e-65
EEF1D	k2	-3.93824	64.4467	-17.0487	3.57558e-65
TPX2	k3	14.9936	64.2119	17.017	6.13914e-65
NPM3	k3	13.4479	64.1214	17.0048	7.56101e-65
ENSSSCG00000004963	k1	-5.57621	64.0442	-16.9944	9.03229e-65
NPM3	k1	-7.2153	63.9314	-16.9792	1.1711e-64
TPX2	k2	-7.63087	63.8913	-16.9738	1.28448e-64
JCHAIN	k2	14.5413	63.817	16.9637	1.52398e-64
JCHAIN	k3	-7.6399	63.8078	-16.9625	1.55685e-64
ENSSSCG00000008433	k2	1.39609	63.7234	16.9511	1.8904e-64
ENSSSCG00000014031	k3	4.25185	63.4358	16.9121	3.6661e-64
PSMA3	k1	-3.3602	63.3374	-16.8987	4.59833e-64
ENSSSCG00000032166	k3	2.99015	63.2543	16.8874	5.56845e-64
CCT4	k3	2.90802	63.1163	16.8687	7.65153e-64
LSM6	k2	-7.61206	62.9348	-16.844	1.16192e-63
ENSSSCG00000003930	k2	-0.526364	62.908	-16.8403	1.23589e-63
GYPC	k2	3.2781	62.8426	16.8314	1.43679e-63
ENSSSCG00000001075	k1	-2.76138	62.8418	-16.8313	1.43932e-63
YWHAB	k3	1.68679	62.6271	16.802	2.36015e-63
DDIT4	k2	3.21971	62.3617	16.7657	4.34809e-63
ENSSSCG00000011272	k3	-0.565	62.3301	-16.7614	4.67674e-63
ARHGDIA	k1	-4.00363	62.2956	-16.7567	5.06292e-63
RPLP0	k3	-0.423785	62.26	-16.7518	5.49534e-63
PIK3R1	k1	3.71432	62.1075	16.7309	7.80682e-63
H3F3A	k2	0.891031	62.0305	16.7203	9.32218e-63
COTL1	k3	1.81518	62.0288	16.7201	9.35896e-63
ENSSSCG00000020830	k3	-0.682046	62.0166	-16.7184	9.62591e-63
ENSSSCG00000010517	k1	-3.53698	61.9673	-16.7116	1.07819e-62
ACP1	k1	-3.91818	61.8639	-16.6974	1.36791e-62
UQCR10	k1	-3.75502	61.7676	-16.6842	1.70782e-62
ENSSSCG00000035768	k2	-0.567213	61.7525	-16.6821	1.76819e-62
ENSSSCG00000021560	k1	-4.3161	61.5503	-16.6543	2.81653e-62
SOD1	k1	-2.35626	61.5224	-16.6504	3.00361e-62
COX17	k1	-1.68933	61.4485	-16.6403	3.56064e-62
PIK3R1	k3	-6.40687	61.4296	-16.6377	3.71882e-62
ENSSSCG00000013366	k3	1.82156	61.4271	16.6373	3.74033e-62
ENSSSCG00000006830	k1	-7.14094	61.3993	-16.6335	3.98733e-62
ENSSSCG00000006061	k1	-3.26585	61.3416	-16.6255	4.55429e-62
KXD1	k1	0.504489	61.3149	16.6218	4.84238e-62
ANXA2	k1	-7.07997	61.2629	-16.6147	5.45852e-62
JCHAIN	k1	-7.084	61.0328	-16.5829	9.27156e-62
ENSSSCG00000035811	k3	-0.446345	61.0161	-16.5805	9.63608e-62
ENSSSCG00000021560	k3	3.7339	60.9459	16.5708	1.13275e-61
RPS26	k2	-0.673986	60.758	-16.5448	1.7457e-61
NDUFV2	k3	4.69009	60.6942	16.5359	2.02228e-61
ND4	k3	0.598162	60.6319	16.5273	2.33405e-61
RPL22	k1	0.672871	60.5459	16.5154	2.84482e-61
RPL7	k2	-0.745201	60.3881	-16.4934	4.09133e-61
PHB2	k1	-6.84961	60.2778	-16.4781	5.27428e-61
TCP1	k2	-7.28159	60.228	-16.4711	5.91563e-61
SPC24	k1	-7.20656	60.0261	-16.443	9.41652e-61
ENSSSCG00000006081	k1	0.826918	59.9775	16.4362	1.05316e-60
ZFP36L1	k1	-1.60652	59.9372	-16.4306	1.1557e-60
SMC3	k3	3.15962	59.936	16.4304	1.15877e-60
TMEM258	k3	3.18767	59.8767	16.4221	1.32821e-60
TXNDC17	k3	2.47667	59.8491	16.4183	1.41548e-60
SPC24	k3	14.5946	59.7563	16.4053	1.75275e-60
ENSSSCG00000006830	k2	-7.43261	59.667	-16.3928	2.15262e-60
SPC24	k2	-7.57474	59.3108	-16.3429	4.8887e-60
UQCR10	k3	3.23106	59.2468	16.3339	5.66476e-60
PFN1	k3	1.07312	59.176	16.3239	6.66855e-60
NDUFA1	k1	-4.29554	58.7561	-16.2648	1.75358e-59
LSM6	k1	-6.01934	58.6488	-16.2497	2.24507e-59
FTL	k3	-0.867376	58.5917	-16.2416	2.56012e-59
GPR183	k1	1.96618	58.537	16.2339	2.90429e-59
ENSSSCG00000001075	k3	2.48019	58.3893	16.213	4.08083e-59
ICOS	k1	-3.67666	58.365	-16.2096	4.3149e-59
PSMB7	k3	4.28072	58.3182	16.203	4.80586e-59
ENSSSCG00000035048	k2	-7.58908	58.2759	-16.197	5.29744e-59
ENSSSCG00000014565	k1	0.565647	58.2624	16.1951	5.46477e-59
ENSSSCG00000014031	k1	-4.07734	57.7561	-16.1232	1.75333e-58
SLC25A6	k1	-0.819742	57.7165	-16.1175	1.92089e-58
ENSSSCG00000037081	k3	1.51755	57.512	16.0884	3.07588e-58
RPL17-C18orf32	k3	-0.545311	57.4493	-16.0795	3.55378e-58
NOP10	k1	-1.66897	57.1077	-16.0307	7.80318e-58
PARK7	k3	2.16734	56.9892	16.0137	1.0251e-57
EIF4A2	k2	1.46976	56.8132	15.9885	1.53759e-57
DYNLL1	k3	2.55491	56.8119	15.9883	1.54193e-57
HSP90AB1	k3	0.839432	56.7058	15.9731	1.96865e-57
CCT2	k3	2.46191	56.6207	15.9608	2.39478e-57
HNRNPC	k1	-2.43048	56.608	-15.959	2.46627e-57
ENSSSCG00000015710	k1	-2.36296	56.547	-15.9502	2.8382e-57
ENSSSCG00000009851	k1	-3.96901	56.4432	-15.9353	3.60388e-57
PSIP1	k1	-2.9887	56.2215	-15.9034	6.00526e-57
DDX17	k1	-4.10085	56.0016	-15.8716	9.96367e-57
ENSSSCG00000034314	k3	3.8353	55.8436	15.8488	1.43337e-56
TNFAIP3	k3	-2.87197	55.8371	-15.8478	1.45501e-56
HMGA1	k2	-7.54802	55.8113	-15.8441	1.54412e-56
ICA1	k1	-7.15432	55.7592	-15.8366	1.74109e-56
NUDT21	k2	-6.94527	55.6894	-15.8264	2.0445e-56
TRAM1	k1	-4.17668	55.6651	-15.8229	2.16224e-56
ENSSSCG00000035520	k3	1.58494	55.6496	15.8207	2.2406e-56
RBMX	k1	-5.99806	55.6372	-15.8189	2.30567e-56
MANF	k3	3.33677	55.5367	15.8043	2.90574e-56
GPR174	k1	-4.18954	55.5173	-15.8015	3.0385e-56
CENPE	k1	-7.14134	55.4789	-15.7959	3.32005e-56
ENSSSCG00000002907	k1	-1.74721	55.4786	-15.7959	3.32214e-56
HMGA1	k1	-7.07677	55.4723	-15.795	3.37056e-56
ENSSSCG00000003691	k1	-1.22603	55.4368	-15.7898	3.65765e-56
ENSSSCG00000034527	k3	4.2294	55.3809	15.7817	4.16014e-56
RPL9	k3	-0.49274	55.361	-15.7788	4.35558e-56
ATP6	k2	0.441351	55.3596	15.7786	4.36914e-56
LSM3	k2	-7.44462	55.2901	-15.7685	5.12787e-56
ENSSSCG00000000576	k3	1.16165	55.2822	15.7673	5.22212e-56
KPNA2	k1	-7.16878	55.1941	-15.7545	6.39621e-56
ELOC	k1	-4.54288	55.0774	-15.7375	8.36801e-56
CENPE	k3	12.4303	55.0425	15.7324	9.06683e-56
POMP	k2	-4.26762	55.0101	-15.7277	9.7699e-56
COX8A	k3	0.981036	55.0041	15.7268	9.9061e-56
NOP58	k2	-7.40717	54.9823	-15.7236	1.04169e-55
KPNA2	k3	14.1911	54.898	15.7113	1.26473e-55
ICA1	k2	12.2596	54.8475	15.704	1.42076e-55
GNLY	k1	12.0443	54.8248	15.7007	1.4969e-55
ENSSSCG00000036296	k2	-0.625461	54.8037	-15.6976	1.57154e-55
ENSSSCG00000009851	k3	3.66085	54.6196	15.6706	2.40113e-55
GNLY	k3	-7.37133	54.5283	-15.6573	2.96264e-55
LSM6	k3	6.36746	54.5265	15.657	2.97497e-55
NDUFB4	k1	-2.11653	54.4875	-15.6513	3.25464e-55
NDFIP1	k1	-2.24105	54.4834	-15.6507	3.28571e-55
ENSSSCG00000003903	k3	1.55218	54.4007	15.6386	3.97491e-55
HSP90AA1	k1	-0.632365	54.3991	-15.6383	3.98967e-55
CCT5	k1	-3.28671	54.1911	-15.6078	6.44067e-55
RAP1A	k1	-1.82765	54.0945	-15.5936	8.04471e-55
TMEM258	k1	-3.08151	54.0933	-15.5934	8.06739e-55
CD37	k3	-3.49136	54.0873	-15.5926	8.17949e-55
NDUFA1	k3	3.61251	53.8519	15.5579	1.40649e-54
GNLY	k2	-7.49536	53.825	-15.5539	1.49622e-54
KPNA2	k2	-7.45248	53.7494	-15.5428	1.78084e-54
PHF5A	k2	-7.00075	53.7428	-15.5418	1.80807e-54
CENPE	k2	-7.41885	53.7206	-15.5385	1.90301e-54
ENSSSCG00000000635	k1	-4.77105	53.613	-15.5226	2.43775e-54
ENSSSCG00000010320	k3	3.43809	53.5548	15.5141	2.78722e-54
PSMA3	k3	2.66087	53.239	15.4673	5.76707e-54
TRA2B	k1	-2.9264	52.9802	-15.4289	1.04675e-53
ATP5MD	k3	2.27817	52.9323	15.4218	1.16872e-53
STX11	k1	-3.79113	52.9225	-15.4203	1.19537e-53
RNPS1	k3	2.81609	52.8822	15.4143	1.31168e-53
POLE4	k3	2.92144	52.8376	15.4077	1.45335e-53
LGMN	k1	-2.24103	52.7898	-15.4006	1.62242e-53
COX5A	k2	-3.00504	52.4941	-15.3565	3.2053e-53
UBL3	k1	3.68531	52.4732	15.3533	3.36394e-53
MCM7	k1	-7.14861	52.4137	-15.3445	3.85745e-53
PSMA4	k3	4.08078	52.3932	15.3414	4.04343e-53
MCM7	k2	-7.5936	52.3275	-15.3316	4.70441e-53
ENSSSCG00000038989	k3	4.40158	52.2918	15.3262	5.10779e-53
CD247	k2	1.95407	52.2754	15.3238	5.30356e-53
PHB2	k3	5.07114	52.1584	15.3063	6.9431e-53
MCM7	k3	13.8691	52.1512	15.3052	7.05962e-53
HSPE1	k2	-1.45462	51.9496	-15.275	1.12309e-52
ENSSSCG00000017213	k3	1.65003	51.731	15.2421	1.85793e-52
RPL17-C18orf32	k2	-0.724864	51.7215	-15.2407	1.89878e-52
IFNG	k2	3.27597	51.7119	15.2392	1.94146e-52
PDCD5	k1	-6.62282	51.7049	-15.2382	1.97287e-52
ENSSSCG00000036114	k3	1.80961	51.5998	15.2224	2.51278e-52
HIKESHI	k1	-4.15895	51.5861	-15.2203	2.59343e-52
YWHAQ	k3	4.49639	51.5265	15.2113	2.97476e-52
ANXA2	k3	5.92554	51.5226	15.2107	3.00167e-52
CENPF	k1	-7.15907	51.3892	-15.1906	4.08117e-52
NDUFC1	k3	2.63102	51.2928	15.176	5.09567e-52
RPLP2	k2	-0.689309	51.2635	-15.1716	5.45082e-52
RNPS1	k1	-2.92218	51.222	-15.1653	5.99785e-52
ATP5PB	k1	-1.95324	51.1741	-15.1581	6.69718e-52
ENSSSCG00000033733	k1	-1.65538	51.1619	-15.1563	6.88838e-52
COX7B	k3	1.1028	51.1564	15.1554	6.97666e-52
CENPF	k3	14.4533	51.1207	15.15	7.57403e-52
DHRS3	k1	-6.48081	51.0643	-15.1415	8.62444e-52
COX8A	k1	-0.957158	50.9021	-15.1169	1.25297e-51
ENSSSCG00000032060	k2	-7.50207	50.8289	-15.1058	1.48299e-51
RPSA	k1	0.421214	50.827	15.1055	1.48935e-51
ENSSSCG00000024313	k3	2.93235	50.7723	15.0972	1.68942e-51
CD2	k2	1.4381	50.6713	15.0819	2.13143e-51
LXN	k2	-7.2803	50.6544	-15.0793	2.21594e-51
RPS15	k3	-0.383165	50.5166	-15.0583	3.0435e-51
POLE4	k1	-2.99385	50.468	-15.0509	3.40391e-51
NDUFB4	k3	1.91841	50.335	15.0307	4.62403e-51
PSMA6	k1	-2.56277	50.3109	-15.027	4.88771e-51
ENSSSCG00000039111	k3	-7.28856	50.3029	-15.0258	4.97872e-51
RHOA	k1	-2.98762	50.2643	-15.0199	5.441e-51
CENPF	k2	-7.41918	50.1468	-15.0019	7.13218e-51
ENSSSCG00000036716	k2	-0.684436	50.1306	-14.9995	7.40208e-51
NUDC	k3	3.67541	50.1053	14.9956	7.84735e-51
SEC11A	k1	-3.60986	49.9623	-14.9737	1.09062e-50
ENSSSCG00000039111	k1	-7.07646	49.9471	-14.9714	1.1296e-50
YWHAH	k1	-6.97688	49.795	-14.9481	1.60326e-50
NDUFS7	k2	-7.01179	49.7856	-14.9466	1.63825e-50
PARK7	k1	-2.13403	49.7665	-14.9437	1.71194e-50
CAPZA2	k1	-3.73831	49.7252	-14.9374	1.88283e-50
ENSSSCG00000039111	k2	14.6735	49.6769	14.9299	2.10447e-50
NDUFC1	k1	-2.87104	49.5487	-14.9103	2.8268e-50
ENSSSCG00000006830	k3	5.83411	49.4641	14.8972	3.43468e-50
LCP1	k3	1.41059	49.4344	14.8927	3.67778e-50
RBM8A	k1	-2.88727	49.3491	-14.8795	4.47613e-50
ENSSSCG00000033212	k3	2.88082	49.3241	14.8757	4.74143e-50
HNRNPH1	k1	-3.2564	49.2932	-14.8709	5.0909e-50
BTG2	k2	3.69068	49.1688	14.8517	6.77972e-50
TRAT1	k1	3.27923	49.0278	14.8299	9.38035e-50
ENSSSCG00000004489	k3	-0.345955	48.997	-14.8252	1.00689e-49
ENSSSCG00000020808	k1	-5.33167	48.834	-14.8	1.46544e-49
NUDC	k1	-3.74807	48.8231	-14.7983	1.50269e-49
ENSSSCG00000006061	k3	2.52845	48.8163	14.7972	1.52637e-49
ENSSSCG00000023158	k3	2.15795	48.6649	14.7738	2.16312e-49
ENSSSCG00000038359	k3	3.67993	48.4719	14.7438	3.37369e-49
ATP5IF1	k3	2.18117	48.239	14.7075	5.76725e-49
HNRNPK	k1	-1.43	48.0596	-14.6795	8.71675e-49
ENSSSCG00000032060	k1	-6.84812	48.0423	-14.6768	9.07148e-49
ANXA2	k2	-6.84384	47.8332	-14.6442	1.46814e-48
NDUFS8	k3	3.29113	47.8107	14.6406	1.5462e-48
ENSSSCG00000016737	k2	-0.848309	47.7915	-14.6376	1.61608e-48
ENSSSCG00000037009	k2	11.9551	47.7557	14.632	1.75518e-48
ENSSSCG00000012166	k2	-7.313	47.6752	-14.6194	2.11263e-48
GNB2	k1	-3.46125	47.2849	-14.5581	5.18862e-48
DARS	k1	-7.10608	47.1934	-14.5437	6.40553e-48
RPS21	k2	-1.01077	46.9825	-14.5104	1.04112e-47
ELOC	k3	3.42887	46.8991	14.4972	1.26143e-47
AP2S1	k3	3.60453	46.8651	14.4919	1.36417e-47
H2AFZ	k2	-1.54324	46.8639	-14.4917	1.36798e-47
ENSSSCG00000024974	k1	0.510671	46.8616	14.4913	1.37547e-47
NDUFS5	k2	-3.17589	46.8548	-14.4902	1.39688e-47
ENSSSCG00000010320	k1	-3.48887	46.8341	-14.4869	1.46528e-47
ND3	k3	1.2162	46.8016	14.4818	1.57893e-47
BUB3	k1	-7.01682	46.7762	-14.4778	1.67427e-47
PRMT1	k3	3.69231	46.7567	14.4747	1.75101e-47
SNRPD3	k2	-5.95528	46.6907	-14.4642	2.03846e-47
ENSSSCG00000032003	k3	2.23069	46.6907	14.4642	2.03853e-47
NDUFA13	k3	1.97048	46.6699	14.4609	2.1384e-47
NDUFS5	k3	1.94179	46.6495	14.4577	2.24105e-47
UBC	k3	-1.45502	46.6299	-14.4546	2.34459e-47
SELENOH	k2	-7.42877	46.5726	-14.4455	2.67542e-47
ENSSSCG00000020830	k2	-0.8187	46.5351	-14.4396	2.91706e-47
HNRNPR	k1	-3.20552	46.5206	-14.4373	3.01611e-47
KPNB1	k2	-7.26576	46.4896	-14.4323	3.23899e-47
ENSSSCG00000038989	k1	-4.53314	46.4865	-14.4319	3.2618e-47
UBALD2	k2	-7.07639	46.3867	-14.416	4.10455e-47
BCAS2	k2	3.03871	46.3443	14.4092	4.52599e-47
ENSSSCG00000000849	k1	-5.60906	46.2845	-14.3997	5.19375e-47
PPIB	k3	1.92705	46.2787	14.3988	5.26407e-47
ENSSSCG00000032556	k3	1.28913	46.2675	14.397	5.40122e-47
DNMT1	k3	3.66637	46.2039	14.3869	6.2534e-47
RALA	k2	-7.09642	46.2036	-14.3869	6.25734e-47
COX5A	k1	-1.77585	45.9884	-14.3525	1.02718e-46
EIF3I	k1	-1.79673	45.9386	-14.3446	1.15184e-46
UCHL5	k1	-6.505	45.8979	-14.3381	1.26491e-46
SSB	k1	-1.4809	45.8684	-14.3334	1.35392e-46
TRMT112	k1	-2.08434	45.8513	-14.3306	1.40824e-46
ENSSSCG00000005656	k1	-2.0321	45.8351	-14.328	1.46183e-46
THYN1	k2	-7.27205	45.7711	-14.3178	1.69401e-46
IFIT1	k3	-6.5756	45.7236	-14.3102	1.88975e-46
ARPC5L	k3	2.40967	45.7104	14.3081	1.94783e-46
PHF5A	k1	-4.85378	45.6353	-14.296	2.31606e-46
NDUFB11	k1	-3.91914	45.6024	-14.2908	2.49831e-46
G3BP1	k1	-4.59515	45.3691	-14.2533	4.27508e-46
ENSSSCG00000037030	k1	0.472853	45.3433	14.2492	4.53676e-46
FOS	k1	-1.93439	45.321	-14.2456	4.77538e-46
ENSSSCG00000039249	k2	-7.28916	45.3032	-14.2427	4.97455e-46
DNMT1	k1	-3.81402	45.2543	-14.2349	5.56818e-46
LSM8	k3	3.92577	45.1761	14.2223	6.66638e-46
SSB	k3	1.42923	45.0841	14.2074	8.23925e-46
PSMB7	k1	-3.65926	45.073	-14.2056	8.45224e-46
ENSSSCG00000032060	k3	6.15742	45.0708	14.2053	8.49483e-46
SRSF7	k3	2.30503	45.0156	14.1964	9.64698e-46
HNRNPC	k3	1.92321	44.996	14.1932	1.00923e-45
TPR	k1	-3.29923	44.9436	-14.1848	1.13861e-45
PSMA4	k1	-3.83805	44.9268	-14.182	1.18362e-45
PRMT1	k1	-3.92992	44.8221	-14.1651	1.5062e-45
FABP6	k3	-7.14677	44.666	-14.1398	2.15775e-45
CCL5	k2	-2.08883	44.642	-14.136	2.28008e-45
MRPL20	k3	4.52175	44.5993	14.129	2.51569e-45
PHF5A	k3	4.66213	44.5622	14.123	2.74036e-45
WDR1	k3	2.47111	44.5171	14.1157	3.03989e-45
PDCD5	k3	4.54343	44.5083	14.1143	3.10215e-45
SEC11A	k3	2.89538	44.4478	14.1044	3.56646e-45
NDUFC2	k3	3.01932	44.4174	14.0995	3.82455e-45
TNFAIP8	k2	2.53318	44.2328	14.0695	5.8509e-45
PSMB6	k3	3.32207	44.1978	14.0638	6.34096e-45
IMP4	k2	-7.24425	44.0875	-14.0458	8.1751e-45
PSMB7	k2	-4.14667	44.0554	-14.0406	8.80234e-45
OAZ1	k2	0.818634	44.0011	14.0317	9.97499e-45
SOD1	k3	1.80234	43.9946	14.0306	1.01263e-44
TOX	k1	-6.49922	43.9754	-14.0275	1.05834e-44
MRPL20	k1	-4.58519	43.8838	-14.0125	1.30687e-44
DDX39A	k1	-7.16316	43.8365	-14.0048	1.45728e-44
ENSSSCG00000010795	k3	4.28852	43.8344	14.0044	1.46412e-44
ENSSSCG00000027573	k2	-0.787315	43.8315	-14.004	1.47394e-44
NDUFB7	k3	3.44603	43.7881	13.9969	1.62874e-44
ENSSSCG00000033653	k1	-2.72229	43.7621	-13.9926	1.72929e-44
CCT8	k2	-7.33827	43.6709	-13.9777	2.1333e-44
TCP1	k3	4.20036	43.644	13.9733	2.26988e-44
GON7	k1	-6.57142	43.5857	-13.9637	2.59589e-44
LSM8	k1	-4.09105	43.5511	-13.958	2.81156e-44
PTBP1	k3	3.67963	43.5287	13.9543	2.96007e-44
ENSSSCG00000027573	k1	0.546018	43.3805	13.93	4.16418e-44
ATP5F1A	k2	-3.03835	43.3557	-13.9259	4.40908e-44
ENSSSCG00000032166	k1	-2.59688	43.2713	-13.912	5.35457e-44
ENSSSCG00000017749	k2	2.91516	43.1693	13.8952	6.77157e-44
ATP5MC1	k2	-3.76078	43.1327	-13.8892	7.36782e-44
NEDD8	k3	2.75793	43.1116	13.8857	7.7342e-44
TIGIT	k1	-6.65364	43.109	-13.8853	7.77953e-44
NDUFB8	k1	-3.70757	43.0769	-13.88	8.37768e-44
RPS17	k3	-0.375241	43.0732	-13.8794	8.44798e-44
AHSA1	k1	-3.87408	42.9893	-13.8655	1.02487e-43
RBM8A	k3	2.36741	42.9816	13.8642	1.04331e-43
EIF4A1	k2	-2.49038	42.9314	-13.8559	1.17117e-43
RPL26	k2	-0.605281	42.8826	-13.8479	1.3105e-43
ATP5F1E	k1	-0.756213	42.8299	-13.8392	1.47941e-43
CCT8	k1	-7.01364	42.8266	-13.8386	1.49085e-43
DDX39A	k2	-7.25825	42.8006	-13.8343	1.58253e-43
ENSSSCG00000000377	k3	5.15766	42.7605	13.8277	1.73599e-43
HMGA1	k3	5.38527	42.7261	13.822	1.87902e-43
SARNP	k1	-7.1506	42.6857	-13.8153	2.06201e-43
ENSSSCG00000036716	k3	-0.45276	42.5987	-13.8008	2.51933e-43
ECHS1	k3	2.94474	42.5758	13.797	2.65555e-43
ITM2A	k1	-7.1667	42.5312	-13.7896	2.94308e-43
MAD2L1	k1	-7.16358	42.5241	-13.7884	2.99168e-43
ENSSSCG00000006919	k2	-6.87445	42.5074	-13.7857	3.1086e-43
MAD2L1	k3	14.1913	42.4452	13.7753	3.58737e-43
ND4	k1	-0.492962	42.3701	-13.7628	4.26441e-43
ENSSSCG00000001398	k2	2.02451	42.3451	13.7587	4.51733e-43
H3F3A	k1	-0.596223	42.3388	-13.7576	4.584e-43
RPS6	k2	-0.64783	42.2032	-13.735	6.26357e-43
GLRX3	k2	-7.2924	42.1834	-13.7317	6.55468e-43
DNMT1	k2	-6.2909	42.1601	-13.7278	6.9172e-43
USP1	k1	-5.37926	42.1592	-13.7277	6.93142e-43
NDUFB8	k3	3.12676	42.0077	13.7024	9.82463e-43
MAD2L1	k2	-7.28351	41.9628	-13.6949	1.08936e-42
USP1	k3	4.88293	41.9204	13.6878	1.20128e-42
NEDD8	k1	-2.8268	41.4925	-13.616	3.21705e-42
ENSSSCG00000016711	k1	-4.44688	41.4738	-13.6128	3.35896e-42
PTPRCAP	k1	-1.05183	41.4623	-13.6109	3.44889e-42
IL6R	k2	5.15247	41.4081	13.6018	3.90747e-42
CLTA	k3	3.90915	41.3266	13.5881	4.71443e-42
EVL	k3	-1.24405	41.2996	-13.5835	5.0167e-42
RPS18	k1	0.397787	41.2618	13.5771	5.47324e-42
BCAS2	k1	-3.504	41.2254	-13.571	5.95174e-42
HIKESHI	k3	2.91971	41.2227	13.5705	5.98855e-42
UBL3	k3	-4.45123	41.1385	-13.5563	7.2697e-42
LSM2	k2	-4.84517	41.0586	-13.5428	8.73714e-42
IFITM3	k2	-1.70081	40.9748	-13.5286	1.05963e-41
G3BP1	k3	4.15211	40.9704	13.5279	1.0705e-41
NDUFB6	k1	-7.11657	40.9509	-13.5246	1.11959e-41
DDX39A	k3	8.90426	40.7981	13.4987	1.59195e-41
BAZ1A	k1	-3.35838	40.78	-13.4956	1.65962e-41
ATP5F1C	k3	2.89374	40.753	13.491	1.76622e-41
SNRPA1	k3	4.78239	40.6964	13.4814	2.0119e-41
ENSSSCG00000000377	k1	-5.37481	40.6025	-13.4655	2.49724e-41
ENSSSCG00000029596	k1	3.82922	40.5692	13.4598	2.69654e-41
FH	k2	-7.20817	40.53	-13.4531	2.95112e-41
RPL7	k1	0.415167	40.529	13.4529	2.95833e-41
CD37	k1	2.28065	40.399	13.4308	3.99046e-41
ENSSSCG00000020808	k3	4.50826	40.3924	13.4297	4.05122e-41
SMC1A	k1	-7.09612	40.3858	-13.4286	4.11349e-41
CD3E	k3	-0.900247	40.326	-13.4184	4.72014e-41
ELF1	k3	-2.09949	40.3251	-13.4182	4.73084e-41
NDUFA6	k1	-6.43306	40.3005	-13.414	5.00571e-41
GCHFR	k2	-7.06509	40.1529	-13.3888	7.03258e-41
LMNB1	k1	-7.16885	40.1255	-13.3841	7.49036e-41
CRTAM	k2	-6.79519	40.0955	-13.379	8.02633e-41
SNRPA1	k1	-4.38075	40.0822	-13.3767	8.27622e-41
LMNB1	k3	13.5788	40.0666	13.374	8.57759e-41
TRMT112	k3	1.85232	40.0174	13.3656	9.60699e-41
CAPZB	k1	-1.74346	39.9788	-13.359	1.04991e-40
ENSSSCG00000011272	k2	-0.618428	39.9478	-13.3537	1.12781e-40
IL10	k2	2.67618	39.9298	13.3506	1.17539e-40
NDUFA13	k1	-1.91178	39.8998	-13.3454	1.25954e-40
ENSSSCG00000036658	k1	-3.59684	39.8145	-13.3308	1.53277e-40
RBM38	k2	2.25734	39.8004	13.3284	1.58327e-40
CDKN2AIPNL	k3	3.25102	39.7934	13.3272	1.60908e-40
RPSA	k3	0.375487	39.7911	13.3268	1.61772e-40
SSRP1	k1	-6.78324	39.7787	-13.3246	1.66459e-40
HNRNPR	k3	2.78579	39.776	13.3242	1.67509e-40
MRPL11	k2	-7.104	39.7677	-13.3227	1.70726e-40
ENSSSCG00000036658	k3	3.20985	39.7484	13.3194	1.78489e-40
HSBP1	k1	-7.07097	39.741	-13.3182	1.81539e-40
ENSSSCG00000010795	k1	-4.33886	39.6924	-13.3098	2.03064e-40
ENSSSCG00000017928	k2	-6.66174	39.6468	-13.3019	2.25537e-40
RPL6	k3	-0.40538	39.5856	-13.2914	2.59643e-40
ATF3	k3	-6.68805	39.4998	-13.2766	3.1638e-40
GSPT2	k3	-6.83196	39.4074	-13.2607	3.91369e-40
LMNB1	k2	-7.1497	39.3829	-13.2564	4.14126e-40
SLIRP	k1	-5.7254	39.3813	-13.2562	4.15599e-40
ENSSSCG00000013232	k3	12.8546	39.3652	13.2534	4.31368e-40
ENSSSCG00000027085	k3	4.03532	39.2299	13.23	5.89012e-40
CLTA	k1	-3.61752	39.0602	-13.2006	8.70592e-40
ENSSSCG00000033653	k3	2.4483	39.0566	13.2	8.77895e-40
CDK4	k2	-6.94994	38.9994	-13.19	1.00135e-39
ENSSSCG00000013232	k2	-7.16182	38.9512	-13.1817	1.11886e-39
ENSSSCG00000037143	k3	2.6816	38.926	13.1773	1.18583e-39
SUCLG1	k3	2.5077	38.9208	13.1764	1.19997e-39
ATP5ME	k1	-2.52115	38.9117	-13.1748	1.22555e-39
CCT2	k2	-3.05589	38.7792	-13.1518	1.66262e-39
CCT7	k3	2.73788	38.7693	13.15	1.701e-39
RFC2	k1	-5.14973	38.7692	-13.15	1.70134e-39
ENSSSCG00000037071	k1	-6.91253	38.7498	-13.1466	1.7793e-39
TUBA1B	k2	-1.08443	38.6203	-13.1241	2.39741e-39
ENSSSCG00000013436	k3	3.04709	38.6108	13.1224	2.45001e-39
ENSSSCG00000009145	k2	-7.08709	38.5347	-13.1091	2.91913e-39
TCEA1	k1	-3.95619	38.5278	-13.1079	2.96652e-39
ENSSSCG00000006081	k3	-0.675813	38.4865	-13.1007	3.26218e-39
ENSSSCG00000016711	k3	3.80362	38.4477	13.0939	3.56694e-39
ENSSSCG00000031741	k1	-7.08071	38.4343	-13.0916	3.67872e-39
ENSSSCG00000034527	k1	-3.47507	38.3272	-13.0728	4.70771e-39
ENSSSCG00000031741	k2	-7.12658	38.2786	-13.0643	5.2645e-39
LAMTOR5	k3	2.74622	38.2756	13.0638	5.30183e-39
UCHL5	k3	4.47789	38.2523	13.0597	5.59431e-39
RFC2	k3	4.20981	38.2088	13.0521	6.18366e-39
YWHAZ	k1	-2.34384	38.2062	-13.0516	6.2206e-39
RPS4X	k1	0.448404	38.1192	13.0364	7.59935e-39
CENPW	k3	12.9454	38.0789	13.0293	8.33791e-39
RBMX	k3	3.38762	38.0704	13.0278	8.50388e-39
CENPW	k1	-7.12391	38.0544	-13.025	8.82308e-39
ENSSSCG00000033212	k1	-2.65369	37.7224	-12.9665	1.89498e-38
ARPC4	k3	2.02595	37.711	12.9645	1.94538e-38
ENSSSCG00000012166	k1	-5.80699	37.6704	-12.9573	2.136e-38
PRELID1	k2	-4.43008	37.6304	-12.9502	2.34209e-38
ENSSSCG00000035728	k1	-3.92692	37.6194	-12.9483	2.40207e-38
PCNA	k2	-3.58515	37.5977	-12.9445	2.52498e-38
GSPT1	k1	-4.62051	37.4332	-12.9153	3.68794e-38
LBH	k1	-6.89982	37.4211	-12.9132	3.79202e-38
CD3G	k1	-1.00233	37.4168	-12.9124	3.83004e-38
CENPW	k2	-7.04452	37.3839	-12.9066	4.13147e-38
SEC61B	k3	1.4206	37.3643	12.9031	4.32228e-38
ENSSSCG00000027085	k1	-3.97156	37.278	-12.8878	5.27282e-38
TXNDC17	k2	-4.01889	37.2596	-12.8845	5.50098e-38
LAT	k2	1.9083	37.2067	12.8751	6.21283e-38
HSPA5	k2	1.30143	37.176	12.8697	6.66882e-38
PSMB4	k3	2.57285	37.1626	12.8673	6.87714e-38
HNRNPU	k3	1.9696	37.1492	12.8649	7.09268e-38
ATP5PO	k3	1.59892	37.1419	12.8636	7.21226e-38
SH2D1A	k2	2.47597	37.1298	12.8615	7.41613e-38
S100A10	k3	1.32881	37.077	12.8521	8.37594e-38
RPS6	k1	0.418436	36.9375	12.8272	1.15478e-37
CD247	k1	-1.59663	36.9355	-12.8268	1.16024e-37
ENSSSCG00000011676	k1	-3.1224	36.8674	-12.8147	1.35709e-37
GON7	k3	5.04076	36.8602	12.8134	1.3799e-37
PSMB6	k1	-3.07417	36.7363	-12.7912	1.83523e-37
IDH2	k3	2.56576	36.7259	12.7894	1.87967e-37
ENSSSCG00000039046	k1	0.588682	36.6725	12.7798	2.12579e-37
ATP5IF1	k1	-1.9409	36.6592	-12.7774	2.19159e-37
SELENOH	k3	5.33638	36.6267	12.7716	2.36188e-37
ENSSSCG00000010214	k3	13.2942	36.5739	12.7621	2.66738e-37
ENSSSCG00000010214	k1	-7.09952	36.5015	-12.7491	3.1517e-37
MDH2	k1	-7.02298	36.4902	-12.7471	3.23472e-37
TCP1	k1	-3.63757	36.4763	-12.7446	3.33987e-37
MDH2	k2	-7.01689	36.4678	-12.7431	3.4056e-37
CNPY2	k2	-6.5587	36.4494	-12.7398	3.55337e-37
GPR174	k2	2.81011	36.416	12.7338	3.83693e-37
ACADM	k1	-7.06934	36.4147	-12.7336	3.84901e-37
DDIT4	k1	-2.39726	36.411	-12.7329	3.88121e-37
PRDX3	k3	4.53418	36.408	12.7324	3.90803e-37
CD1D	k2	-6.85329	36.3908	-12.7293	4.06639e-37
SEC61G	k3	2.11481	36.386	12.7284	4.11173e-37
LCK	k2	1.52294	36.3654	12.7247	4.3112e-37
ENSSSCG00000023331	k1	-1.2029	36.3622	-12.7241	4.34279e-37
PRELID1	k3	3.81129	36.3144	12.7155	4.84883e-37
ND5	k3	1.32462	36.2975	12.7125	5.04139e-37
LAMTOR5	k1	-3.02058	36.2885	-12.7109	5.1467e-37
EIF1B	k1	-3.04962	36.2335	-12.701	5.84154e-37
ENSSSCG00000033697	k1	0.458377	36.1789	12.6911	6.62327e-37
ENSSSCG00000002004	k3	1.5419	36.0958	12.6761	8.01998e-37
DNAJC2	k2	-6.85944	36.0505	-12.6679	8.90214e-37
ENSSSCG00000015040	k3	2.03963	35.9943	12.6578	1.01325e-36
PTPRC	k3	-0.92757	35.9923	-12.6574	1.01789e-36
ATP5MD	k1	-1.98564	35.9167	-12.6437	1.21138e-36
SNRPC	k1	-4.22312	35.9069	-12.642	1.23899e-36
BUB3	k3	5.06898	35.8513	12.6319	1.40823e-36
NDUFV2	k2	-5.31842	35.8481	-12.6313	1.41876e-36
CDK4	k1	-5.42003	35.834	-12.6288	1.46569e-36
MRPL55	k3	3.59172	35.7493	12.6134	1.781e-36
IL7R	k2	-6.13446	35.7426	-12.6122	1.80869e-36
DUSP1	k3	-3.13871	35.7398	-12.6117	1.82047e-36
POLR2E	k3	3.25589	35.6365	12.5929	2.30942e-36
PTBP1	k1	-3.24931	35.636	-12.5928	2.31227e-36
ENSSSCG00000033212	k2	-3.811	35.6007	-12.5864	2.50784e-36
AKR1B1	k1	-7.06591	35.581	-12.5828	2.62401e-36
KPNB1	k3	4.91831	35.5655	12.58	2.7197e-36
RPS13	k2	-0.712767	35.5505	-12.5773	2.81526e-36
NOLC1	k2	-6.54573	35.4828	-12.565	3.28988e-36
NONO	k3	3.37363	35.4727	12.5631	3.36755e-36
CCT7	k1	-2.82755	35.4236	-12.5542	3.77074e-36
CCT8	k3	5.72081	35.4159	12.5528	3.83805e-36
NUDC	k2	-5.93176	35.4154	-12.5527	3.842e-36
ENSSSCG00000038359	k1	-3.00594	35.4059	-12.551	3.92756e-36
IFI30	k1	-6.95645	35.3958	-12.5491	4.01945e-36
ENSSSCG00000007743	k1	-0.987159	35.2714	-12.5264	5.35352e-36
NDUFC2	k1	-2.89315	35.2442	-12.5214	5.69943e-36
NR4A2	k2	3.44274	35.2169	12.5165	6.06893e-36
CALR	k1	-2.19428	35.2149	-12.5161	6.09744e-36
ENSSSCG00000036626	k1	11.0116	35.1998	12.5133	6.31302e-36
EIF4G2	k1	-1.85464	35.1907	-12.5117	6.44564e-36
ENSSSCG00000036626	k2	-6.94103	35.1705	-12.508	6.75263e-36
GADD45A	k1	-6.76464	35.1673	-12.5074	6.80324e-36
ENSSSCG00000013721	k3	2.80737	35.1631	12.5066	6.86838e-36
NKG7	k2	-6.37228	35.0657	-12.4888	8.59517e-36
ATP5ME	k3	2.14966	35.0172	12.4799	9.61113e-36
TIMP1	k3	-2.73225	35.0075	-12.4781	9.82897e-36
EIF2S2	k3	2.33324	34.9908	12.4751	1.02141e-35
ENSSSCG00000003903	k2	-2.04519	34.9726	-12.4717	1.0652e-35
ENSSSCG00000008433	k1	-0.837907	34.9726	-12.4717	1.06524e-35
COX7A2	k2	-1.94221	34.9705	-12.4713	1.0703e-35
ARPC2	k1	-0.753601	34.9671	-12.4707	1.07882e-35
ENSSSCG00000031741	k3	6.52018	34.9604	12.4695	1.09535e-35
ENSSSCG00000000576	k2	-1.427	34.9265	-12.4633	1.18435e-35
DPY30	k1	-3.74883	34.9021	-12.4588	1.25284e-35
NUDT21	k3	3.53541	34.8506	12.4493	1.41049e-35
CAPZB	k3	1.52379	34.8262	12.4448	1.49222e-35
RPL7L1	k1	-4.15739	34.823	-12.4442	1.50303e-35
TMA7	k1	-0.878888	34.7945	-12.439	1.60496e-35
POLR2E	k1	-3.6321	34.7895	-12.4381	1.62385e-35
CDK4	k3	5.46572	34.7726	12.435	1.68815e-35
ENSSSCG00000013232	k1	-6.07927	34.7102	-12.4235	1.94896e-35
HNRNPK	k3	1.17149	34.583	12.4	2.61208e-35
DNAJB1	k2	2.39713	34.5598	12.3958	2.7554e-35
LSM3	k3	3.97494	34.5502	12.394	2.81729e-35
ENSSSCG00000028397	k1	-3.3555	34.5489	-12.3937	2.82545e-35
ENSSSCG00000010214	k2	-6.78934	34.5481	-12.3936	2.83106e-35
ITM2B	k2	1.53637	34.5056	12.3858	3.12144e-35
COTL1	k1	-1.43354	34.4667	-12.3786	3.41449e-35
SSRP1	k2	-5.86785	34.4448	-12.3745	3.59091e-35
ENSSSCG00000003042	k2	-0.41509	34.4437	-12.3743	3.59997e-35
PRDX2	k1	-5.47659	34.4418	-12.374	3.61567e-35
GNB2	k3	2.65672	34.4379	12.3732	3.64803e-35
IL10	k1	-2.51983	34.4151	-12.369	3.84498e-35
ENSSSCG00000036626	k3	-6.69443	34.4052	-12.3672	3.93338e-35
RALY	k3	2.85448	34.2843	12.3448	5.19638e-35
NDUFB11	k3	2.94072	34.225	12.3338	5.95611e-35
ENSSSCG00000034190	k1	-1.75766	34.2248	-12.3338	5.95903e-35
ARPC5L	k1	-2.15975	34.1533	-12.3205	7.02612e-35
DNAJA1	k3	1.18867	34.1454	12.319	7.15538e-35
ENSSSCG00000033500	k2	-1.33082	34.1428	-12.3185	7.19788e-35
RPS20	k2	-0.344685	34.134	-12.3169	7.34535e-35
MYO5A	k1	-2.9165	34.1285	-12.3159	7.43818e-35
KPNB1	k1	-5.24837	34.1116	-12.3127	7.73424e-35
NDUFB10	k3	2.82998	34.0973	12.3101	7.99244e-35
SMARCA5	k2	2.12681	34.0773	12.3064	8.3699e-35
VIM	k2	-3.16884	34.0477	-12.3009	8.96054e-35
NDUFB6	k3	5.58231	34.0353	12.2986	9.21857e-35
NOP10	k3	1.19265	34.0353	12.2986	9.21958e-35
IMP4	k3	5.21707	34.0285	12.2973	9.36558e-35
RTRAF	k3	1.37951	33.9943	12.2909	1.01314e-34
LCP1	k1	-1.19931	33.9917	-12.2905	1.01924e-34
TALDO1	k3	3.27088	33.9812	12.2885	1.0443e-34
PRDX3	k1	-4.19253	33.9796	-12.2882	1.04801e-34
ENSSSCG00000003849	k1	-5.29848	33.9186	-12.2768	1.2062e-34
HPF1	k1	-6.85733	33.8113	-12.2568	1.54411e-34
SQLE	k1	-6.77718	33.8103	-12.2566	1.54791e-34
RPL7L1	k3	3.73872	33.8043	12.2555	1.56925e-34
MRPL55	k1	-3.52273	33.7912	-12.2531	1.61733e-34
ENSSSCG00000037143	k1	-2.60681	33.6894	-12.2341	2.04461e-34
CDKN2AIPNL	k1	-3.3614	33.5725	-12.2122	2.67631e-34
HNRNPH1	k3	2.39897	33.5632	12.2104	2.73378e-34
NDUFB2	k3	2.99353	33.541	12.2063	2.87726e-34
ENSSSCG00000024313	k1	-2.39522	33.489	-12.1965	3.24321e-34
RPS26	k3	-0.360521	33.4641	-12.1919	3.43444e-34
TENT5A	k2	12.2557	33.4067	12.1811	3.9205e-34
GSPT2	k2	5.83804	33.3308	12.1668	4.66874e-34
ARPC5	k3	1.63968	33.32	12.1648	4.78622e-34
CARHSP1	k1	-6.42911	33.3181	-12.1644	4.80766e-34
SSRP1	k3	6.47594	33.265	12.1544	5.43268e-34
FKBP3	k1	-3.66079	33.1825	-12.1389	6.56967e-34
GPX4	k1	1.47423	33.1709	12.1367	6.74741e-34
LYAR	k3	13.0089	32.9997	12.1044	1.00068e-33
PDCD5	k2	-6.12117	32.9981	-12.1041	1.0044e-33
RALY	k1	-2.97885	32.9734	-12.0995	1.06304e-33
MDH2	k3	6.43417	32.9731	12.0994	1.06397e-33
PTGES3	k1	-6.90205	32.9196	-12.0893	1.20331e-33
ENSSSCG00000012166	k3	4.5386	32.8943	12.0845	1.2755e-33
ENSSSCG00000034190	k3	1.67708	32.883	12.0824	1.30915e-33
PHB	k2	-6.35202	32.8352	-12.0733	1.4614e-33
TRIB1	k1	-6.80831	32.812	-12.0689	1.54158e-33
LYAR	k1	-6.92687	32.8117	-12.0689	1.54269e-33
ARFGAP3	k2	-6.62798	32.8084	-12.0682	1.55436e-33
CDKN2C	k1	-6.92346	32.8059	-12.0678	1.5634e-33
SEC61B	k2	-2.1833	32.7889	-12.0645	1.62579e-33
SRP14	k3	2.36432	32.7562	12.0583	1.75319e-33
HNRNPU	k1	-1.946	32.679	-12.0437	2.09424e-33
ENSSSCG00000037602	k2	1.6611	32.6329	12.0349	2.32883e-33
ENSSSCG00000013436	k1	-2.89123	32.6037	-12.0294	2.49063e-33
TPM4	k1	-4.27675	32.5909	-12.0269	2.56518e-33
NONO	k1	-3.52929	32.5755	-12.024	2.65781e-33
LYAR	k2	-6.77281	32.572	-12.0233	2.6792e-33
RAD21	k1	-3.8667	32.5053	-12.0106	3.12427e-33
HMCES	k1	-4.5642	32.5026	-12.0101	3.14369e-33
EIF5B	k1	-3.61807	32.4969	-12.009	3.18512e-33
COX7C	k3	0.95824	32.4907	12.0079	3.23063e-33
ENSSSCG00000013052	k1	-4.71506	32.4844	-12.0067	3.27783e-33
TALDO1	k1	-3.41188	32.4713	-12.0042	3.37817e-33
PHB	k3	4.33904	32.4495	12	3.55255e-33
ARPC5	k1	-1.67843	32.4153	-11.9935	3.84345e-33
CYC1	k1	-4.47134	32.3995	-11.9905	3.98524e-33
SUCLG1	k2	-3.44499	32.3508	-11.9812	4.45883e-33
HSPD1	k2	-2.68095	32.2808	-11.9678	5.23893e-33
AKR1B1	k3	6.66983	32.2329	11.9587	5.84964e-33
HSPA9	k1	-4.77295	32.2274	-11.9576	5.92361e-33
YWHAZ	k3	1.97858	32.1459	11.942	7.14741e-33
CBX5	k3	12.6674	32.0694	11.9274	8.52253e-33
COX1	k2	0.373435	32.0501	11.9237	8.91091e-33
ENSSSCG00000013721	k1	-3.02634	32.0432	-11.9223	9.0525e-33
ENSSSCG00000040118	k2	2.13014	31.9776	11.9097	1.05305e-32
ENSSSCG00000010203	k3	1.10332	31.9582	11.906	1.10091e-32
AHSA1	k3	2.75628	31.9526	11.905	1.11524e-32
RAD21	k3	3.54935	31.9288	11.9004	1.17826e-32
RAC2	k1	-0.586997	31.9277	-11.9002	1.18105e-32
SUMO1	k1	-3.07156	31.9114	-11.897	1.22638e-32
TKT	k2	-6.6846	31.8926	-11.8934	1.28051e-32
ENSSSCG00000003236	k1	-6.80294	31.7622	-11.8683	1.72901e-32
GNG2	k1	-1.95781	31.7206	-11.8603	1.90301e-32
NOLC1	k3	4.15031	31.7057	11.8574	1.96946e-32
GSPT1	k3	3.6438	31.5824	11.8336	2.61591e-32
SFPQ	k3	2.65096	31.575	11.8322	2.66078e-32
AP2S1	k1	-2.98134	31.5073	-11.8191	3.10928e-32
TIMM8B	k1	-4.7421	31.4737	-11.8126	3.35933e-32
CBX5	k1	-6.76728	31.4339	-11.8049	3.68248e-32
C11orf58	k1	-1.57141	31.4031	-11.7989	3.95315e-32
EIF2S1	k3	11.599	31.368	11.7921	4.28517e-32
GLRX3	k3	4.68418	31.3327	11.7853	4.6486e-32
SERBP1	k3	0.854836	31.326	11.784	4.72073e-32
RPL26L1	k3	3.01545	31.2398	11.7673	5.75704e-32
ENSSSCG00000006260	k1	-6.71182	31.2342	-11.7662	5.83236e-32
ENSSSCG00000014371	k1	-2.14198	31.2072	-11.7609	6.20515e-32
ENSSSCG00000007355	k1	-2.02416	31.206	-11.7607	6.22341e-32
EIF2S1	k1	-6.76655	31.1665	-11.753	6.81518e-32
ENSSSCG00000023158	k1	-1.78972	31.1192	-11.7438	7.59905e-32
ENSSSCG00000038364	k3	3.23491	31.1046	11.741	7.85983e-32
ND2	k3	-0.467735	31.0766	-11.7355	8.3828e-32
ENSSSCG00000038359	k2	-4.46822	31.0511	-11.7305	8.88972e-32
ENSSSCG00000037009	k3	-6.06064	31.0229	-11.725	9.48728e-32
USP1	k2	-5.23253	31.0117	-11.7228	9.73431e-32
ENSSSCG00000004963	k3	3.10745	30.9552	11.7118	1.10879e-31
EIF2S1	k2	-6.60911	30.9534	-11.7115	1.11334e-31
RPL9	k2	-0.495659	30.9502	-11.7108	1.1216e-31
PMAIP1	k2	-6.33684	30.9499	-11.7108	1.1222e-31
IDH2	k1	-2.44505	30.9487	-11.7105	1.12549e-31
GDI2	k3	2.9961	30.9374	11.7084	1.15498e-31
ENSSSCG00000003520	k1	-1.26401	30.9329	-11.7075	1.16702e-31
ARF6	k2	1.60249	30.9151	11.704	1.21596e-31
SELENOH	k1	-4.53724	30.8777	-11.6967	1.32537e-31
OAZ1	k3	0.54621	30.8594	11.6931	1.38232e-31
ACTR2	k3	2.05932	30.8151	11.6845	1.53063e-31
ENSSSCG00000002004	k2	-2.30567	30.7724	-11.6761	1.68885e-31
CAPZA1	k1	-1.8251	30.7648	-11.6746	1.71862e-31
ENSSSCG00000033019	k3	0.494368	30.7385	11.6694	1.82605e-31
EZR	k3	1.7951	30.6725	11.6565	2.1258e-31
ENSSSCG00000034072	k3	1.74576	30.6436	11.6509	2.27175e-31
SLIRP	k3	4.1699	30.6361	11.6494	2.31167e-31
ATF4	k2	1.51971	30.5836	11.6391	2.60864e-31
TNFAIP3	k1	1.84877	30.4999	11.6226	3.16302e-31
ENSSSCG00000035538	k3	2.79516	30.478	11.6183	3.32644e-31
MRPL57	k3	2.27412	30.4401	11.6108	3.63023e-31
ENSSSCG00000037869	k3	3.73752	30.4234	11.6076	3.77223e-31
ENSSSCG00000032166	k2	-4.20813	30.4234	-11.6076	3.7726e-31
NDUFS7	k3	3.66657	30.4069	11.6043	3.91807e-31
ENSSSCG00000012811	k3	5.89994	30.373	11.5976	4.23596e-31
ITM2A	k2	5.15152	30.3705	11.5971	4.26102e-31
LTA	k1	-6.73612	30.2667	-11.5767	5.41122e-31
RACK1	k1	0.549612	30.256	11.5746	5.54581e-31
HSPA9	k3	4.33707	30.2052	11.5645	6.23397e-31
MYL6	k1	-0.797591	30.1959	-11.5627	6.36953e-31
ATF3	k2	5.75235	30.1409	11.5518	7.22914e-31
IMP4	k1	-5.77417	30.067	-11.5372	8.57065e-31
BUD31	k3	3.38565	30.0573	11.5352	8.76491e-31
RAC1	k1	-3.76417	30.0466	-11.5331	8.98267e-31
DAD1	k1	-2.20868	30.0394	-11.5317	9.13318e-31
ARF6	k1	-1.3916	30.0152	-11.5269	9.65578e-31
ENSSSCG00000027085	k2	-4.04127	30.0079	-11.5255	9.8197e-31
BUD31	k1	-3.68804	30.0059	-11.525	9.86607e-31
ELAVL1	k1	-4.18159	29.9247	-11.5089	1.18929e-30
PTP4A2	k1	-2.25032	29.9187	-11.5077	1.20591e-30
TXNDC17	k1	-1.77383	29.9135	-11.5067	1.22031e-30
NDUFB7	k1	-3.13712	29.9105	-11.5061	1.22877e-30
NIFK	k1	-6.56657	29.9033	-11.5047	1.2494e-30
RNASEH2C	k3	3.07465	29.8163	11.4874	1.52646e-30
FKBP3	k3	3.17337	29.8143	11.487	1.53368e-30
ENSSSCG00000003885	k1	-6.57644	29.7623	-11.4766	1.72864e-30
ENSSSCG00000035544	k2	-6.42666	29.7148	-11.4672	1.92842e-30
PSMB3	k2	-6.42513	29.7134	-11.4669	1.9347e-30
SUMO1	k3	2.55381	29.6857	11.4614	2.062e-30
HIST1H2AG	k3	13.5572	29.6231	11.4489	2.382e-30
NOLC1	k1	-4.07646	29.6209	-11.4485	2.39365e-30
HSP90AB1	k1	-0.605899	29.6147	-11.4472	2.42839e-30
PLP2	k1	-4.15184	29.5935	-11.443	2.54954e-30
BTF3	k2	-0.834525	29.5656	-11.4374	2.71881e-30
ENSSSCG00000012811	k1	-6.0693	29.5341	-11.4311	2.92339e-30
SMC1A	k3	4.59669	29.4742	11.4191	3.35616e-30
ENSSSCG00000029066	k2	-6.40792	29.4417	-11.4126	3.6166e-30
NME2	k1	-0.925296	29.4048	-11.4052	3.93766e-30
PCBP2	k2	-6.30723	29.339	-11.392	4.58185e-30
HIST1H2AG	k1	-6.6471	29.3267	-11.3896	4.71355e-30
CCT2	k1	-1.7617	29.3053	-11.3853	4.9511e-30
MRPL20	k2	-3.97836	29.2818	-11.3806	5.22645e-30
FUS	k1	-2.44805	29.2237	-11.3689	5.97416e-30
ENSSSCG00000037869	k1	-3.58781	29.2234	-11.3688	5.97923e-30
COA3	k1	-6.61136	29.1762	-11.3593	6.6644e-30
RPA2	k3	11.7078	29.1753	11.3592	6.6784e-30
PSIP1	k3	1.72705	29.1734	11.3588	6.70752e-30
ENSSSCG00000037009	k1	-5.49241	29.1484	-11.3537	7.10571e-30
ENSSSCG00000000849	k3	3.19828	29.1449	11.353	7.16372e-30
BZW1	k3	2.04236	29.1259	11.3492	7.48291e-30
RPA2	k1	-6.62495	29.0939	-11.3428	8.05545e-30
RAP1A	k3	1.20544	29.0707	11.3381	8.497e-30
RAD23A	k1	-6.58108	29.0517	-11.3343	8.87833e-30
BATF	k3	2.18275	29.031	11.3301	9.31187e-30
ENSSSCG00000039635	k1	-6.55732	28.8532	-11.2942	1.40217e-29
ENSSSCG00000003849	k3	3.65445	28.7958	11.2826	1.60025e-29
SEC13	k2	-6.36718	28.7923	-11.2818	1.61342e-29
HIST1H2AG	k2	-6.42105	28.7557	-11.2744	1.75504e-29
RPA2	k2	-6.43476	28.7377	-11.2708	1.82934e-29
ARPC4	k1	-1.84866	28.665	-11.256	2.16269e-29
LSM3	k1	-3.464	28.6408	-11.2511	2.28662e-29
RNASEH2C	k1	-3.21197	28.6378	-11.2505	2.30241e-29
ENSSSCG00000011764	k3	3.45557	28.6323	11.2494	2.33193e-29
ENSSSCG00000000697	k1	-3.65427	28.6262	-11.2482	2.3649e-29
SARNP	k3	4.45872	28.625	11.2479	2.37149e-29
ENSSSCG00000035538	k1	-2.80799	28.6154	-11.246	2.42419e-29
MTDH	k3	2.45937	28.611	11.2451	2.44915e-29
FKBP5	k1	-6.53681	28.4955	-11.2216	3.19491e-29
PTBP1	k2	-5.13236	28.4265	-11.2075	3.74578e-29
ENSSSCG00000007088	k3	1.71964	28.4071	11.2036	3.91687e-29
SLC25A3	k3	0.910477	28.3892	11.1999	4.08119e-29
TOX	k2	4.48623	28.3511	11.1921	4.45572e-29
ATP5F1C	k1	-2.46369	28.3437	-11.1906	4.53173e-29
SNRPC	k3	3.00154	28.2878	11.1792	5.15426e-29
CYTIP	k3	-1.72434	28.2835	-11.1783	5.20607e-29
DPY30	k3	2.75251	28.26	11.1735	5.496e-29
BZW1	k1	-2.17262	28.227	-11.1668	5.92977e-29
RPS9	k3	-0.379381	28.2082	-11.1629	6.19138e-29
RPL22	k2	-0.64964	28.1776	-11.1567	6.64399e-29
PPID	k1	-6.53396	28.1618	-11.1534	6.88891e-29
EIF3L	k3	2.94477	28.1366	11.1483	7.3007e-29
ARHGDIA	k2	-3.81592	28.095	-11.1397	8.03446e-29
ENSSSCG00000014371	k3	1.91579	28.0811	11.1369	8.2965e-29
GMFG	k3	1.33724	28.0653	11.1337	8.60384e-29
ENSSSCG00000006395	k3	1.52131	28.0648	11.1335	8.61398e-29
GLIPR1	k1	-5.49386	28.0572	-11.132	8.76675e-29
COX3	k3	-0.242372	28.0345	-11.1273	9.23701e-29
SPCS1	k1	-1.78085	27.9512	-11.1102	1.11897e-28
PFN1	k2	0.919371	27.9305	11.106	1.17349e-28
ENSSSCG00000023331	k3	1.00575	27.8489	11.0892	1.41624e-28
MRPL17	k1	-3.2048	27.8137	-11.0819	1.53583e-28
RAC2	k3	-0.561798	27.7913	-11.0773	1.61683e-28
MRPS25	k1	-6.44453	27.7526	-11.0693	1.76766e-28
RPN1	k2	-6.26323	27.7522	-11.0692	1.76943e-28
MRPS25	k2	-6.2744	27.7148	-11.0615	1.92824e-28
PPP1R15A	k1	-2.20884	27.7075	-11.06	1.96101e-28
SH3BGRL3	k3	-0.835305	27.7015	-11.0588	1.9882e-28
EIF5B	k3	2.8284	27.6732	11.0529	2.12229e-28
NDUFA6	k3	4.09652	27.6692	11.0521	2.14209e-28
HSBP1	k3	4.80233	27.6502	11.0481	2.23786e-28
DHRS3	k2	3.64715	27.6302	11.044	2.34296e-28
CD200	k2	12.5207	27.6175	11.0414	2.4127e-28
CDKN2C	k3	6.08883	27.6174	11.0414	2.41312e-28
SKP1	k1	-1.64106	27.5916	-11.036	2.56121e-28
ENSSSCG00000037071	k3	5.73759	27.5756	11.0327	2.65726e-28
WDR1	k1	-2.03346	27.556	-11.0287	2.77944e-28
CTLA4	k3	1.86808	27.5139	11.0199	3.06234e-28
TRAT1	k3	-3.04039	27.4803	-11.013	3.30865e-28
ENSSSCG00000035544	k3	6.85823	27.3998	10.9963	3.98313e-28
TRDC	k3	-6.41132	27.3952	-10.9953	4.02494e-28
NDUFB2	k1	-2.81869	27.3943	-10.9951	4.03379e-28
ENSSSCG00000035728	k3	2.93811	27.3624	10.9885	4.34073e-28
NDUFA8	k2	-6.31948	27.3428	-10.9844	4.54195e-28
TMPO	k3	13.4414	27.3411	10.9841	4.55932e-28
CD200	k1	-6.46504	27.3205	-10.9798	4.78059e-28
FTL	k2	0.728132	27.2699	10.9693	5.3716e-28
NDUFS4	k1	-4.43773	27.2636	-10.9679	5.44951e-28
EIF4H	k1	-3.11086	27.2479	-10.9647	5.65106e-28
RPL11	k2	-0.440814	27.2324	-10.9614	5.85649e-28
MRPS15	k2	-6.27774	27.138	-10.9418	7.2776e-28
TMPO	k1	-6.45342	27.117	-10.9374	7.63856e-28
HERPUD1	k1	-3.24644	27.0998	-10.9338	7.9473e-28
RPL26L1	k1	-2.80567	27.0945	-10.9327	8.04493e-28
ENSSSCG00000038444	k3	2.85312	27.0479	10.9229	8.95553e-28
PTP4A2	k3	1.90996	27.0405	10.9214	9.11041e-28
SSR2	k3	-0.896233	27.0354	-10.9203	9.21738e-28
COA3	k2	-6.22211	26.9971	-10.9123	1.00661e-27
EDF1	k1	-2.70754	26.9952	-10.9119	1.01123e-27
ENSSSCG00000026064	k2	-3.50753	26.9221	-10.8966	1.19642e-27
ACOT7	k1	-6.24684	26.915	-10.8951	1.21605e-27
THYN1	k3	3.86424	26.9051	10.893	1.24433e-27
TRDC	k1	9.6128	26.8948	10.8909	1.27417e-27
ENSSSCG00000013064	k3	0.668353	26.8894	10.8897	1.28999e-27
SF3A3	k1	-6.39561	26.8816	-10.8881	1.31329e-27
TUBA4A	k3	2.15016	26.8804	10.8878	1.31713e-27
ECHS1	k1	-2.3397	26.851	-10.8817	1.40919e-27
ENSSSCG00000003885	k2	-6.18389	26.8445	-10.8803	1.43058e-27
MICOS13	k1	-6.37666	26.7505	-10.8606	1.77635e-27
GRB2	k1	-2.43638	26.739	-10.8582	1.82401e-27
ENSSSCG00000000377	k2	-4.83432	26.7386	-10.8581	1.82569e-27
PHB	k1	-4.09215	26.7285	-10.856	1.86835e-27
ZNRF1	k1	-3.95191	26.6428	-10.8379	2.27623e-27
ENSSSCG00000001696	k2	-6.18591	26.5735	-10.8233	2.66999e-27
SON	k2	1.58342	26.5575	10.8199	2.77003e-27
EIF2S2	k1	-2.05116	26.5401	-10.8163	2.8833e-27
GTF2H5	k1	-6.01147	26.5183	-10.8116	3.03169e-27
MTDH	k1	-2.54261	26.5117	-10.8103	3.0782e-27
ENSSSCG00000006395	k2	-2.74099	26.4967	-10.8071	3.1865e-27
ATP5MC2	k3	1.47202	26.48	10.8035	3.31158e-27
EIF3H	k2	-2.19373	26.4467	-10.7965	3.57505e-27
EIF4G2	k3	1.45941	26.4466	10.7965	3.57628e-27
FUS	k3	2.34169	26.4432	10.7958	3.60418e-27
TSPO	k1	-5.34962	26.4403	-10.7952	3.62822e-27
IGFBP2	k1	-6.34181	26.4222	-10.7913	3.78279e-27
STOML2	k3	3.863	26.4202	10.7909	3.8003e-27
GPD1	k1	-3.65624	26.412	-10.7892	3.87256e-27
HSPB1	k3	-0.860601	26.3881	-10.7841	4.09183e-27
PSMB9	k3	2.79709	26.3816	10.7827	4.15317e-27
UBB	k1	0.334046	26.3548	10.7771	4.41794e-27
RBM39	k1	-1.99631	26.3382	-10.7735	4.58982e-27
CHCHD5	k2	-6.23177	26.3203	-10.7698	4.78294e-27
PRDX6	k1	-2.63341	26.2281	-10.7502	5.91472e-27
MCM4	k3	13.5525	26.2103	10.7464	6.16167e-27
SNX3	k1	-3.77717	26.1725	-10.7384	6.72268e-27
UBL3	k2	-4.13814	26.1381	-10.731	7.27687e-27
PPID	k3	6.81833	26.1362	10.7306	7.30852e-27
ATP5F1E	k3	0.583798	26.1198	10.7272	7.58904e-27
ENSSSCG00000038364	k2	-3.82393	26.0925	-10.7213	8.08217e-27
ENSSSCG00000009303	k1	0.353032	26.0899	10.7208	8.12934e-27
ENSSSCG00000035544	k1	-5.07641	26.076	-10.7178	8.39528e-27
MCM4	k2	-6.27466	26.0382	-10.7098	9.15718e-27
MCM4	k1	-6.3394	26.0025	-10.7022	9.94165e-27
PSMB9	k1	-3.17798	25.9726	-10.6958	1.06512e-26
EIF3A	k3	2.24809	25.9391	10.6886	1.15062e-26
S100A10	k1	-1.15841	25.9333	-10.6874	1.16604e-26
ENSSSCG00000009145	k3	4.60932	25.8754	10.675	1.33216e-26
ATP6	k3	-0.239736	25.8732	-10.6745	1.33906e-26
SMARCE1	k1	-3.48144	25.8228	-10.6638	1.50391e-26
PRELID1	k1	-2.9772	25.8218	-10.6636	1.50725e-26
ENSSSCG00000034853	k1	-6.28644	25.8198	-10.6631	1.51434e-26
KARS	k3	2.17299	25.8054	10.66	1.56527e-26
GPD1	k3	3.18422	25.7287	10.6436	1.86748e-26
GABARAP	k1	-1.00896	25.7182	-10.6414	1.91329e-26
UQCRC1	k3	2.47925	25.713	10.6402	1.93664e-26
OSTF1	k2	-3.05333	25.6562	-10.628	2.207e-26
CYC1	k3	3.66297	25.655	10.6278	2.21331e-26
SNX3	k3	3.14015	25.6488	10.6264	2.24503e-26
NDUFS6	k1	-6.27035	25.6415	-10.6249	2.28296e-26
ATP5PO	k2	-2.37386	25.6294	-10.6223	2.3473e-26
ENSSSCG00000000697	k3	3.26653	25.6287	10.6221	2.3513e-26
PLP2	k3	3.6903	25.6286	10.6221	2.35202e-26
REXO2	k1	-6.27476	25.5862	-10.613	2.59327e-26
ENSSSCG00000008677	k1	-5.119	25.5742	-10.6104	2.66571e-26
EDF1	k3	2.42826	25.5574	10.6068	2.77057e-26
TMPO	k2	-6.1269	25.5365	-10.6023	2.90734e-26
MRPS12	k2	-6.22454	25.535	-10.602	2.91775e-26
MRPS12	k1	-6.27586	25.4898	-10.5922	3.23725e-26
PRDX3	k2	-3.96437	25.486	-10.5914	3.26556e-26
ENSSSCG00000001505	k1	-4.34823	25.4811	-10.5904	3.30292e-26
GLRX3	k1	-3.9495	25.4361	-10.5807	3.66319e-26
TXN2	k1	-5.25977	25.366	-10.5655	4.30502e-26
EIF4H	k3	2.65951	25.3541	10.563	4.42527e-26
ENSSSCG00000032003	k1	-1.64785	25.3463	-10.5613	4.50552e-26
ENSSSCG00000034896	k1	-6.27246	25.3381	-10.5595	4.59089e-26
TPM4	k3	3.46199	25.3364	10.5591	4.60879e-26
UBE2V1	k3	2.60394	25.3027	10.5519	4.98025e-26
SYNCRIP	k3	3.72587	25.2734	10.5455	5.32875e-26
COX7B	k1	-0.782473	25.2671	-10.5442	5.40581e-26
ENSSSCG00000033909	k2	1.31381	25.2438	10.5391	5.70486e-26
ENSSSCG00000013596	k3	2.81851	25.241	10.5385	5.74094e-26
ENSSSCG00000009327	k2	-1.00002	25.1966	-10.5289	6.35953e-26
PRPF40A	k1	-2.44825	25.1757	-10.5243	6.67317e-26
PDAP1	k3	3.38593	25.171	10.5233	6.74487e-26
ENSSSCG00000000635	k2	2.64137	25.1541	10.5197	7.01281e-26
PLGRKT	k3	4.27085	25.1216	10.5126	7.55733e-26
RNF19A	k2	2.25065	25.1199	10.5122	7.58798e-26
PSMD14	k1	-6.24117	25.0826	-10.5041	8.2674e-26
RPIA	k2	-6.14216	25.0636	-10.5	8.63744e-26
ARPC2	k3	0.618947	25.0536	10.4978	8.83884e-26
ENSSSCG00000011952	k1	0.449575	25.051	10.4973	8.89262e-26
SRP14	k1	-2.1756	25.0442	-10.4958	9.03268e-26
COA3	k3	6.48244	25.041	10.4951	9.09862e-26
NR4A2	k3	-3.20073	25.009	-10.4881	9.79396e-26
LAMTOR2	k3	3.4621	24.9987	10.4859	1.00293e-25
LSP1	k1	-1.08881	24.9882	-10.4836	1.02766e-25
MRPS12	k3	10.458	24.9534	10.476	1.11319e-25
ENSSSCG00000013661	k2	-2.51509	24.948	-10.4748	1.12722e-25
EIF1AX	k3	3.81232	24.9462	10.4745	1.13183e-25
COMMD3	k1	-6.21825	24.8555	-10.4547	1.39488e-25
MRPL17	k3	2.99763	24.8097	10.4447	1.54983e-25
RPL39	k2	-0.401015	24.7995	-10.4425	1.58655e-25
NOP58	k3	3.23675	24.7877	10.4399	1.63058e-25
ENSSSCG00000010517	k2	-3.28065	24.7402	-10.4295	1.81888e-25
ETFA	k1	-6.19632	24.737	-10.4288	1.83226e-25
EEF1AKMT1	k2	-6.07726	24.7358	-10.4285	1.83749e-25
DUSP1	k1	-2.38034	24.7264	-10.4264	1.87774e-25
RBM17	k1	-6.15974	24.7256	-10.4263	1.88112e-25
ENSSSCG00000037602	k3	1.28888	24.6959	10.4198	2.01397e-25
NDUFS8	k1	-2.32271	24.558	-10.3895	2.7668e-25
MRPL57	k1	-2.11723	24.5517	-10.3881	2.80763e-25
CNN2	k3	2.11584	24.5468	10.3871	2.83922e-25
PRDX4	k1	-4.11471	24.4929	-10.3752	3.2147e-25
MCM6	k1	-6.19463	24.4911	-10.3748	3.22804e-25
MCM6	k2	-6.15345	24.4841	-10.3733	3.27997e-25
ENSSSCG00000004446	k3	1.91604	24.4737	10.371	3.35968e-25
ENSSSCG00000029066	k1	-5.09138	24.4724	-10.3707	3.36999e-25
SYNCRIP	k1	-3.61739	24.4337	-10.3622	3.68355e-25
PPIB	k1	-1.40522	24.4303	-10.3614	3.71306e-25
KIFC1	k3	13.564	24.4165	10.3584	3.83229e-25
HSP90AA1	k3	0.400252	24.3719	10.3486	4.24758e-25
S100A4	k3	2.89895	24.3507	10.3439	4.4597e-25
MCM6	k3	11.0475	24.3097	10.3349	4.90174e-25
KIFC1	k1	-6.18428	24.3029	-10.3333	4.97907e-25
ENSSSCG00000037595	k1	-3.97338	24.2982	-10.3323	5.03265e-25
ENSSSCG00000030295	k2	-3.30128	24.2911	-10.3307	5.11602e-25
FKBP4	k1	-3.78401	24.2707	-10.3263	5.36141e-25
ACTR2	k1	-1.84075	24.2456	-10.3207	5.68088e-25
CD3D	k2	1.71652	24.241	10.3197	5.741e-25
BCAP31	k1	-2.24565	24.1769	-10.3055	6.65442e-25
TOMM7	k3	2.65159	24.1568	10.301	6.96964e-25
BATF	k2	2.24968	24.1464	10.2988	7.13813e-25
ENSSSCG00000001414	k1	-3.3972	24.133	-10.2958	7.36131e-25
ENSSSCG00000038444	k1	-3.05537	24.1289	-10.2949	7.43122e-25
ENSSSCG00000028695	k1	-6.16869	24.097	-10.2878	7.99755e-25
RSRC2	k1	-1.86096	24.0734	-10.2826	8.44448e-25
ENSSSCG00000004145	k3	1.41331	24.0652	10.2807	8.60653e-25
HDAC2	k3	4.40978	24.0186	10.2704	9.58102e-25
UQCC2	k3	3.59499	23.9754	10.2608	1.05828e-24
NDUFS4	k3	3.85932	23.9728	10.2602	1.06452e-24
ND5	k1	-1.11262	23.9585	-10.257	1.10032e-24
AP1S1	k1	-6.02176	23.9257	-10.2497	1.18666e-24
KIFC1	k2	-6.07594	23.9254	-10.2497	1.18743e-24
ENSSSCG00000008061	k1	-1.12717	23.9165	-10.2477	1.21208e-24
ENSSSCG00000023323	k1	-4.30288	23.84	-10.2306	1.4456e-24
ENSSSCG00000001414	k3	2.95643	23.8292	10.2282	1.48183e-24
NDUFA8	k1	-6.07564	23.8149	-10.2251	1.53146e-24
PSMB2	k2	-2.44687	23.8092	-10.2238	1.55163e-24
ENSSSCG00000001398	k3	-1.39038	23.8002	-10.2218	1.58431e-24
ENSSSCG00000037869	k2	-5.77523	23.7675	-10.2145	1.70801e-24
RRAGC	k1	-3.11916	23.7474	-10.21	1.78877e-24
POLE3	k1	-6.06284	23.7228	-10.2045	1.89326e-24
ENSSSCG00000016100	k2	-4.9124	23.685	-10.196	2.06515e-24
CCT5	k2	-3.38682	23.6828	-10.1955	2.07592e-24
AP1S1	k3	5.71035	23.6656	10.1917	2.15955e-24
CD9	k1	-6.12455	23.659	-10.1902	2.19295e-24
NAA20	k1	-3.71777	23.6514	-10.1885	2.23157e-24
RNPEP	k1	-6.078	23.6441	-10.1869	2.26933e-24
TNF	k1	-6.11574	23.6316	-10.1841	2.33536e-24
SRSF9	k2	-6.01016	23.563	-10.1687	2.73534e-24
ENSSSCG00000039582	k2	-2.36455	23.5565	-10.1672	2.7765e-24
UCHL3	k2	-6.07802	23.5371	-10.1629	2.9036e-24
EIF4A2	k1	-0.792737	23.4799	-10.15	3.31237e-24
MRPL11	k3	3.82487	23.4528	10.144	3.52499e-24
PITHD1	k1	-5.99807	23.436	-10.1402	3.66424e-24
RPS11	k2	-0.315188	23.4208	-10.1368	3.79488e-24
RCC2	k1	-6.0547	23.3919	-10.1302	4.0564e-24
SRSF9	k1	-6.04144	23.3882	-10.1294	4.09056e-24
SAT1	k1	-0.460215	23.3788	-10.1273	4.18035e-24
HDAC2	k1	-5.31866	23.3757	-10.1266	4.21018e-24
ENSSSCG00000023323	k3	3.97279	23.3656	10.1243	4.3093e-24
PSMB4	k1	-1.95502	23.3178	-10.1135	4.81098e-24
FABP6	k2	4.46675	23.2948	10.1084	5.07169e-24
RTF2	k2	-5.91462	23.2796	-10.1049	5.25341e-24
GHITM	k1	-3.6035	23.2763	-10.1042	5.29341e-24
ENSSSCG00000020790	k3	1.43943	23.2721	10.1032	5.34494e-24
NFKBIA	k1	-1.17674	23.2699	-10.1028	5.3712e-24
INSIG1	k1	-4.17074	23.259	-10.1003	5.50865e-24
ITGB2	k1	-3.3101	23.2283	-10.0934	5.91103e-24
ENSSSCG00000035811	k2	-0.36393	23.2081	-10.0888	6.19265e-24
ENSSSCG00000040782	k1	-4.54628	23.208	-10.0888	6.19505e-24
BTG2	k3	-2.61553	23.1825	-10.083	6.56829e-24
PDAP1	k1	-3.59963	23.1623	-10.0784	6.88106e-24
ENSSSCG00000027826	k2	-5.97736	23.0931	-10.0628	8.06998e-24
NCL	k3	1.51574	23.0539	10.0539	8.83293e-24
RPS21	k1	0.471198	23.0496	10.0529	8.92119e-24
CHCHD3	k2	-5.84685	22.9807	-10.0373	1.04539e-23
TOMM7	k2	-4.72668	22.9531	-10.031	1.11407e-23
PFDN2	k1	-3.53108	22.9499	-10.0303	1.12216e-23
NUDT21	k1	-2.7914	22.8556	-10.0088	1.39439e-23
ITGB7	k2	-5.92051	22.8537	-10.0083	1.40071e-23
CCND2	k1	-2.99956	22.8366	-10.0045	1.4569e-23
RNF19A	k3	-2.38613	22.8154	-9.99962	1.52981e-23
ENSSSCG00000034448	k2	-0.296159	22.726	-9.97922	1.87945e-23
CISD2	k1	-6.01262	22.7075	-9.97499	1.96119e-23
UBE2V1	k1	-2.54711	22.6996	-9.97318	1.99721e-23
NDUFA8	k3	5.76795	22.6945	9.97202	2.02077e-23
IGFBP2	k3	6.5345	22.6919	9.97142	2.03301e-23
ENSSSCG00000002449	k3	3.16044	22.6656	9.96542	2.15952e-23
ENSSSCG00000024313	k2	-2.83153	22.6582	-9.96372	2.1968e-23
ENSSSCG00000035048	k3	2.83869	22.6411	9.9598	2.28515e-23
ACOT7	k3	5.00169	22.6279	9.95678	2.35565e-23
UQCRC1	k2	-5.05337	22.6139	-9.95359	2.43257e-23
ZFP36L2	k2	0.789803	22.6032	9.95113	2.49332e-23
SKA2	k1	-6.03612	22.6019	-9.95082	2.50112e-23
GON7	k2	-5.45022	22.5791	-9.9456	2.63568e-23
COPS2	k2	-5.87286	22.5694	-9.94337	2.69538e-23
RBX1	k3	2.56839	22.5627	9.94185	2.73705e-23
ENSSSCG00000003691	k2	0.952262	22.53	9.93435	2.95093e-23
PRPS1	k2	-5.99494	22.508	-9.92929	3.10472e-23
ENSSSCG00000036988	k3	3.40271	22.4632	9.919	3.44198e-23
EEF1D	k3	1.05969	22.4279	9.91089	3.73297e-23
NASP	k1	-6.02933	22.4265	-9.91055	3.74562e-23
ENSSSCG00000013052	k3	3.28781	22.412	9.90722	3.87256e-23
AURKAIP1	k1	-4.74159	22.381	-9.90009	4.15912e-23
TRA2A	k1	-5.9454	22.3665	-9.89675	4.30034e-23
IFI30	k3	4.43363	22.3606	9.89539	4.3592e-23
ENSSSCG00000007609	k2	-5.87212	22.2509	-9.87008	5.61222e-23
NUF2	k1	-6.02132	22.2383	-9.86717	5.77715e-23
NUF2	k3	13.5276	22.2153	9.86186	6.09124e-23
MRPL12	k3	2.67573	22.1973	9.85771	6.3482e-23
ENSSSCG00000034927	k2	-5.82247	22.1864	-9.85518	6.51011e-23
SNRPN	k1	-3.5293	22.1761	-9.85279	6.66697e-23
ENSSSCG00000029857	k3	2.68285	22.1134	9.83827	7.70229e-23
SNRNP200	k1	-5.95324	22.0801	-9.83056	8.31554e-23
HDAC1	k1	-5.35202	22.0727	-9.82884	8.45871e-23
TMBIM6	k1	-1.12513	22.0655	-9.82717	8.60024e-23
GHITM	k3	3.05612	22.0596	9.8258	8.71777e-23
RFC4	k2	-6.02773	22.0501	-9.82361	8.90973e-23
HMMR	k1	-6.01148	22.0407	-9.82141	9.10619e-23
RFC4	k1	-6.00978	22.0377	-9.82071	9.16953e-23
HYPK	k1	-1.34795	22.0368	-9.82052	9.1866e-23
SEC11C	k3	2.73537	22.0275	9.81835	9.38662e-23
NCL	k1	-1.62514	22.0048	-9.81309	9.88953e-23
HMMR	k3	13.6037	21.9989	9.81171	1.00255e-22
RFC4	k3	13.5932	21.9987	9.81167	1.00292e-22
UQCRC2	k3	5.75041	21.9958	9.811	1.00963e-22
ENSSSCG00000037595	k3	3.42373	21.9818	9.80774	1.04273e-22
UCHL5	k2	-4.81137	21.9429	-9.7987	1.14041e-22
RAP1B	k1	-1.9452	21.9418	-9.79844	1.14332e-22
SF3B5	k3	1.49529	21.9396	9.79792	1.14927e-22
ENSSSCG00000029577	k2	-6.02258	21.861	-9.77962	1.37725e-22
TIMM8B	k3	3.23462	21.7951	9.76424	1.60302e-22
PRDX6	k3	2.07893	21.7859	9.76211	1.63712e-22
ENSSSCG00000029577	k1	-5.9773	21.7791	-9.76051	1.66311e-22
ENSSSCG00000029577	k3	13.154	21.7746	9.75946	1.68054e-22
FH	k3	3.81416	21.7548	9.75484	1.75875e-22
NDUFS7	k1	-3.16289	21.7544	-9.75474	1.76055e-22
DAZAP1	k2	-5.91862	21.7327	-9.74967	1.85069e-22
IL17F	k2	-6.0281	21.7024	-9.7426	1.9842e-22
ELAVL1	k3	3.02253	21.6833	9.73812	2.07362e-22
RRAGC	k3	3.06797	21.6796	9.73726	2.09123e-22
ATP5F1C	k2	-4.41203	21.6659	-9.73405	2.15821e-22
UGCG	k2	5.93064	21.6481	9.72987	2.2487e-22
ENSSSCG00000010320	k2	-2.94996	21.5554	-9.70815	2.78353e-22
ENSSSCG00000012517	k1	-3.97394	21.5451	-9.70573	2.85042e-22
POLR2G	k3	3.26297	21.5315	9.70254	2.94093e-22
EWSR1	k3	2.94886	21.5256	9.70116	2.981e-22
GMNN	k2	-5.75605	21.5143	-9.6985	3.05967e-22
SPCS1	k3	1.49091	21.4969	9.6944	3.18502e-22
SMARCE1	k3	2.95838	21.4838	9.69132	3.28267e-22
ENSSSCG00000029066	k3	4.41634	21.4827	9.69107	3.2905e-22
GABARAP	k2	1.08913	21.4671	9.68741	3.41081e-22
DUSP5	k1	-3.19261	21.4407	-9.68118	3.62497e-22
SEC61G	k1	-1.68945	21.4145	-9.67502	3.85018e-22
ST6GALNAC4	k1	-3.26889	21.4054	-9.67287	3.93184e-22
RASL11A	k2	12.7487	21.3978	9.67109	4.00098e-22
PSMB3	k1	-4.87201	21.3904	-9.66935	4.06963e-22
DAD1	k3	1.79057	21.3786	9.66655	4.18227e-22
RASL11A	k3	-6.22147	21.3766	-9.66609	4.20107e-22
ENSSSCG00000014296	k2	-5.9251	21.3677	-9.66398	4.28862e-22
THYN1	k1	-3.46841	21.3486	-9.65948	4.48124e-22
CNN2	k2	-3.56407	21.3182	-9.65231	4.80611e-22
C11orf58	k3	1.19984	21.294	9.64659	5.08183e-22
CYTIP	k2	1.63563	21.2524	9.63675	5.59302e-22
ENSSSCG00000006260	k3	4.64121	21.242	9.63429	5.72861e-22
IKZF3	k1	-2.74704	21.2386	-9.63349	5.7733e-22
OXA1L	k2	-5.86895	21.2362	-9.63293	5.80492e-22
PPIH	k1	-4.95465	21.2313	-9.63176	5.8713e-22
HMCES	k3	3.33692	21.1866	9.62119	6.50712e-22
ERP29	k1	-5.84918	21.1835	-9.62046	6.55345e-22
TMED9	k3	2.65413	21.1051	9.60188	7.84982e-22
TXN2	k3	4.69928	21.0909	9.5985	8.11152e-22
ENSSSCG00000032003	k2	-2.44644	21.088	-9.59781	8.166e-22
NDFIP1	k2	1.56875	21.0773	9.59527	8.36984e-22
ENSSSCG00000015040	k1	-1.56532	21.0662	-9.59263	8.58637e-22
EEF1B2	k3	-0.511025	21.0647	-9.59229	8.61517e-22
PTGES3	k3	4.18387	21.0596	9.59108	8.71693e-22
RBM42	k1	-2.9672	21.0592	-9.59097	8.7259e-22
CCNB1	k1	-5.94836	21.025	-9.58284	9.4414e-22
UCHL3	k3	6.23324	21.0189	9.58141	9.57321e-22
PRKAR1A	k1	-2.22451	21.0118	-9.5797	9.73249e-22
ENSSSCG00000033987	k1	-5.7921	20.9946	-9.57561	1.01258e-21
NUP50	k3	2.45978	20.9769	9.57141	1.05455e-21
RPL3	k1	0.397877	20.9742	9.57077	1.06112e-21
ARPC3	k3	0.659835	20.9629	9.56807	1.08915e-21
DAPP1	k1	-5.89919	20.9568	-9.56662	1.10462e-21
MRPS25	k3	4.55118	20.9431	9.56336	1.13993e-21
CCNB1	k3	13.495	20.9183	9.55744	1.20701e-21
SLA-DQB1	k2	-5.79751	20.9133	-9.55625	1.22102e-21
PARP1	k1	-4.37127	20.9124	-9.55604	1.22344e-21
PDIA6	k1	-3.34604	20.9096	-9.55536	1.23153e-21
CLINT1	k1	-3.18205	20.9064	-9.55461	1.24054e-21
NUF2	k2	-5.82655	20.8923	-9.55124	1.28153e-21
EIF1AX	k1	-3.74763	20.8786	-9.54797	1.32259e-21
ENSSSCG00000034896	k3	5.50982	20.8755	9.54723	1.33212e-21
MRPL24	k1	-5.86672	20.8359	-9.53778	1.45921e-21
ENSSSCG00000017749	k3	-2.06796	20.82	-9.53399	1.51347e-21
RBX1	k1	-2.72185	20.8125	-9.53219	1.53997e-21
EIF3D	k3	1.91034	20.8023	9.52976	1.57652e-21
GRB2	k3	1.92598	20.7534	9.51807	1.76425e-21
ND2	k1	0.369425	20.7531	9.51799	1.76559e-21
GTF2H5	k3	3.7676	20.7332	9.51322	1.84842e-21
SFPQ	k1	-2.19871	20.7265	-9.51162	1.87725e-21
IL6R	k1	-3.3279	20.6896	-9.50278	2.04361e-21
IL4R	k2	-5.70662	20.6877	-9.50232	2.05267e-21
TIMM13	k2	-5.94076	20.6685	-9.49772	2.1454e-21
PSMD14	k3	6.14611	20.6583	9.49526	2.19652e-21
RSL1D1	k2	-5.67953	20.6484	-9.49289	2.24713e-21
SF3A3	k3	5.24421	20.6478	9.49276	2.25005e-21
DLGAP5	k1	-5.92766	20.6215	-9.48644	2.39069e-21
CENPA	k1	-5.92519	20.6171	-9.48539	2.41481e-21
ST6GALNAC4	k3	2.75948	20.5856	9.47782	2.5964e-21
RPL36AL	k2	-1.11735	20.5541	-9.47025	2.79187e-21
PTGER4	k3	-5.70362	20.4911	-9.45507	3.22806e-21
DLGAP5	k3	13.4732	20.4896	9.45471	3.23929e-21
CENPA	k3	13.3657	20.4874	9.4542	3.25511e-21
BCAS4	k2	-5.76435	20.4655	-9.4489	3.424e-21
INSIG1	k2	3.83379	20.4586	9.44726	3.47816e-21
NDUFB6	k2	-5.60853	20.4577	-9.44704	3.48545e-21
SFPQ	k2	-3.87733	20.4287	-9.44004	3.7264e-21
CALM1	k1	-0.674845	20.4262	-9.43943	3.74823e-21
NAA20	k3	3.19756	20.4253	9.43921	3.75609e-21
PSMB3	k3	4.60486	20.4216	9.43833	3.78763e-21
EIF3D	k2	-3.46285	20.4139	-9.43646	3.85587e-21
CCNB1	k2	-5.8674	20.409	-9.43529	3.89917e-21
ENSSSCG00000038364	k1	-2.44737	20.398	-9.43263	3.99943e-21
SERHL2	k1	-5.90663	20.3947	-9.43183	4.0299e-21
ENSSSCG00000039544	k2	-0.412656	20.3714	-9.42619	4.25241e-21
ENSSSCG00000039635	k3	4.8874	20.3589	9.42319	4.37593e-21
HMMR	k2	-5.77556	20.3505	-9.42115	4.46157e-21
METAP2	k1	-3.26074	20.3422	-9.41914	4.54776e-21
ENSSSCG00000026354	k1	-5.88931	20.3339	-9.41713	4.6357e-21
ENSSSCG00000034314	k2	-4.34766	20.3317	-9.41661	4.65867e-21
GCHFR	k3	3.59088	20.324	9.41474	4.74267e-21
PRPF40A	k3	2.09681	20.3101	9.41138	4.89646e-21
CNPY2	k3	2.99142	20.3083	9.41094	4.91705e-21
STOML2	k1	-3.42453	20.2964	-9.40806	5.05376e-21
ENSSSCG00000013315	k3	1.72289	20.2709	9.4019	5.35883e-21
DLGAP5	k2	-5.89179	20.2497	-9.39676	5.62699e-21
UCHL3	k1	-5.54454	20.233	-9.3927	5.8482e-21
CIAO2B	k1	-5.82994	20.2263	-9.39107	5.93945e-21
JAK1	k2	1.27777	20.2253	9.39083	5.95267e-21
ENSSSCG00000026302	k1	-5.90896	20.2179	-9.38905	6.0545e-21
NIFK	k3	4.19582	20.2158	9.38853	6.08432e-21
SEC13	k3	4.83867	20.2075	9.38652	6.20169e-21
CBX5	k2	-5.55973	20.2049	-9.38588	6.23909e-21
BBS7	k1	-5.89581	20.1902	-9.38233	6.45302e-21
ENSSSCG00000003885	k3	4.07593	20.1302	9.36776	7.40904e-21
CST3	k2	3.9421	20.1218	9.36571	7.55417e-21
LCK	k1	-0.965339	20.1054	-9.36171	7.84528e-21
TGIF2-RAB5IF	k1	-1.7482	20.0957	-9.35936	8.02213e-21
LAT	k1	-1.24845	20.0938	-9.3589	8.0568e-21
EIF3I	k2	-1.68882	20.0778	-9.355	8.36006e-21
UBE2D3	k1	-0.793948	20.0774	-9.35489	8.36855e-21
ENSSSCG00000026302	k3	13.2957	20.0591	9.35045	8.72728e-21
MTA2	k1	-5.76851	20.0461	-9.34729	8.99195e-21
ND3	k2	-1.16511	20.0448	-9.34696	9.02012e-21
RHOA	k3	1.63497	20.0314	9.34371	9.30203e-21
ENSSSCG00000011764	k1	-2.69756	20.0096	-9.33839	9.7807e-21
UQCRC2	k1	-5.57511	20.0087	-9.33816	9.80271e-21
YWHAH	k3	2.83151	20.0005	9.33616	9.98875e-21
ENSSSCG00000012517	k3	3.48468	19.9647	9.32743	1.08469e-20
CXCR6	k1	-5.87463	19.943	-9.32214	1.14021e-20
EWSR1	k1	-2.84049	19.9384	-9.32102	1.15227e-20
SNF8	k3	2.5306	19.9107	9.31423	1.22839e-20
ENSSSCG00000007088	k1	-1.55127	19.8876	-9.30859	1.29546e-20
ACADM	k3	3.96695	19.8834	9.30756	1.30798e-20
ENSSSCG00000013596	k2	-3.09719	19.8516	-9.29979	1.40723e-20
SKA2	k3	6.22099	19.8394	9.29679	1.44749e-20
THOC7	k3	3.06374	19.8274	9.29385	1.48813e-20
SF3B2	k3	2.21419	19.8221	9.29255	1.50631e-20
ILF3	k3	3.41028	19.7911	9.28496	1.61775e-20
ENSSSCG00000014296	k1	-5.72957	19.7875	-9.28407	1.63125e-20
CD53	k2	1.24389	19.778	9.28175	1.66711e-20
KHDRBS1	k1	-3.03931	19.7561	-9.27638	1.7533e-20
ENSSSCG00000002449	k1	-3.24467	19.7545	-9.27598	1.75997e-20
SH3KBP1	k1	-2.68018	19.7455	-9.27377	1.79674e-20
ITGB2	k2	3.05841	19.6834	9.25852	2.07283e-20
NDUFB9	k3	1.95714	19.6742	9.25625	2.11729e-20
ENSSSCG00000036350	k2	0.739701	19.6632	9.25353	2.17195e-20
RBBP4	k3	2.60604	19.6592	9.25257	2.19159e-20
PLGRKT	k1	-4.2137	19.6397	-9.24776	2.2924e-20
TGIF2-RAB5IF	k3	1.56846	19.6373	9.24717	2.3052e-20
SUCLG1	k1	-1.8296	19.6266	-9.24453	2.3628e-20
ARHGDIB	k1	-0.42981	19.624	-9.24389	2.37702e-20
LAPTM5	k2	-0.785508	19.5594	-9.22798	2.75774e-20
ENSSSCG00000033700	k1	-5.83071	19.554	-9.22663	2.79285e-20
ENSSSCG00000017555	k3	2.12199	19.551	9.22589	2.81211e-20
THOC7	k1	-3.20019	19.4566	-9.20257	3.49474e-20
RAC1	k3	2.59796	19.4522	9.20149	3.5301e-20
PSMD14	k2	-5.5854	19.4411	-9.19875	3.62145e-20
KHDRBS1	k3	2.71131	19.43	9.196	3.71539e-20
ENSSSCG00000000097	k3	1.94135	19.4106	9.1912	3.88472e-20
SUGT1	k1	-4.27328	19.4097	-9.19098	3.89281e-20
PFKP	k1	-5.67654	19.4023	-9.18913	3.96048e-20
HIST2H2AC	k1	-5.86457	19.3799	-9.18359	4.16945e-20
ENSSSCG00000033700	k3	10.9831	19.3696	9.18103	4.27003e-20
ENSSSCG00000007609	k1	-5.66431	19.3675	-9.18052	4.29032e-20
BCCIP	k3	3.3014	19.366	9.18013	4.30566e-20
ENSSSCG00000011676	k3	2.01939	19.3526	9.17682	4.44018e-20
ENSSSCG00000008677	k3	4.42261	19.3253	9.17005	4.72797e-20
ENSSSCG00000033700	k2	-5.84468	19.311	-9.16649	4.8867e-20
PPID	k2	-5.54888	19.3025	-9.16439	4.98287e-20
PGK1	k3	3.55024	19.2982	9.16331	5.03311e-20
MAX	k2	2.28026	19.2928	9.16198	5.09541e-20
ENSSSCG00000003903	k1	-0.940979	19.2706	-9.15646	5.3629e-20
GZMK	k2	-5.71531	19.2434	-9.14968	5.7101e-20
SNRNP40	k2	-5.89961	19.2415	-9.14922	5.73487e-20
ENSSSCG00000011764	k2	-4.02536	19.2212	-9.14417	6.00905e-20
UQCC2	k1	-4.44539	19.1789	-9.13363	6.62426e-20
RBBP4	k1	-2.55879	19.1675	-9.13079	6.80041e-20
DIABLO	k1	-5.8532	19.1608	-9.12914	6.90481e-20
ENSSSCG00000033019	k1	0.377156	19.1576	9.12833	6.95657e-20
CAPZA1	k3	1.34019	19.1326	9.12209	7.36913e-20
SCML4	k3	-6.18003	19.1246	-9.1201	7.50567e-20
LAMTOR2	k1	-3.34229	19.1121	-9.11697	7.72543e-20
COX5B	k2	-1.22801	19.1073	-9.11577	7.81162e-20
MYL6	k3	0.61502	19.1038	9.1149	7.87456e-20
DYNLRB1	k3	2.94165	19.0873	9.11077	8.17967e-20
ETFA	k3	5.8382	19.0108	9.09165	9.7544e-20
ATAD2	k1	-5.86223	18.9988	-9.08865	1.00272e-19
NDUFB10	k1	-2.11239	18.9942	-9.08749	1.0135e-19
SRSF4	k1	-3.99661	18.9922	-9.087	1.01806e-19
SNRNP25	k1	-5.66646	18.9915	-9.08683	1.0197e-19
LBR	k3	3.39041	18.9489	9.07615	1.12484e-19
ENSSSCG00000026302	k2	-5.74312	18.9321	-9.07193	1.16929e-19
SKP1	k3	1.31377	18.9289	9.07114	1.17781e-19
JARID2	k2	1.76861	18.9235	9.06977	1.19264e-19
PLAAT3	k1	-5.8362	18.919	-9.06865	1.205e-19
CENPA	k2	-5.70681	18.9116	-9.06679	1.2257e-19
HSD17B10	k1	-5.7936	18.8528	-9.05202	1.40343e-19
SAP18	k1	-1.07631	18.8384	-9.04841	1.45064e-19
ATP5MC2	k2	-2.00171	18.8223	-9.04435	1.5056e-19
SNF8	k2	-3.98451	18.8065	-9.04038	1.5613e-19
IFIT1	k2	2.59432	18.8044	9.03986	1.56876e-19
NDUFS6	k3	4.65512	18.8041	9.03978	1.56982e-19
CDC20	k1	-5.85718	18.7968	-9.03792	1.59679e-19
SON	k1	-1.11923	18.789	-9.03596	1.62563e-19
ENSSSCG00000017626	k1	-5.48543	18.7867	-9.03539	1.63418e-19
DKC1	k2	-5.4993	18.7648	-9.02986	1.71886e-19
ATAD2	k3	12.4519	18.7573	9.02799	1.74856e-19
ENSSSCG00000028695	k3	5.13384	18.7229	9.01931	1.89278e-19
ENSSSCG00000014969	k1	-5.8263	18.6962	-9.01256	2.01293e-19
ENSSSCG00000006665	k1	-5.02091	18.6669	-9.00516	2.15345e-19
AURKAIP1	k3	3.98951	18.6658	9.00489	2.15876e-19
ENSSSCG00000014296	k3	6.19151	18.6584	9.00303	2.19576e-19
SRPK1	k1	-2.34118	18.6522	-9.00146	2.22731e-19
PPIB	k2	-2.03735	18.6446	-8.99955	2.26654e-19
GDI2	k1	-2.32033	18.6268	-8.99503	2.3617e-19
GMNN	k1	-5.21136	18.6161	-8.99233	2.42051e-19
GDI2	k2	-4.81892	18.6014	-8.98861	2.50386e-19
HNRNPD	k3	3.77853	18.5933	8.98655	2.55103e-19
RPL6	k2	-0.371869	18.5699	-8.98063	2.69217e-19
CDC20	k3	13.2508	18.5672	8.97994	2.70905e-19
SRSF10	k3	2.15237	18.5631	8.97891	2.7346e-19
PPIH	k3	4.99572	18.5502	8.97564	2.81719e-19
ENSSSCG00000001505	k3	3.51148	18.5264	8.96961	2.97555e-19
ENSSSCG00000036988	k1	-3.12612	18.5107	-8.96561	3.08567e-19
MICOS13	k3	5.03711	18.5079	8.9649	3.10549e-19
DDX17	k3	1.76292	18.5051	8.9642	3.12546e-19
BBS7	k3	9.41033	18.4949	8.96163	3.19927e-19
BRWD1	k1	-5.81388	18.4568	-8.95194	3.49288e-19
NASP	k3	5.32966	18.4452	8.94899	3.58743e-19
HSPB1	k1	-0.692845	18.4176	-8.94197	3.82278e-19
ATOX1	k1	-2.94874	18.4084	-8.93963	3.90472e-19
ENSSSCG00000001696	k1	-4.15323	18.3807	-8.93258	4.16205e-19
ENSSSCG00000034896	k2	-5.48407	18.3477	-8.92416	4.49083e-19
MSH6	k2	-5.86554	18.3425	-8.92285	4.54457e-19
NASP	k2	-5.53997	18.3173	-8.91641	4.81664e-19
ENSSSCG00000037081	k2	1.02559	18.3171	8.91637	4.81806e-19
NONO	k2	-3.41982	18.2999	-8.91197	5.01334e-19
TIMM10	k2	-5.60594	18.2993	-8.91182	5.01997e-19
POLR2K	k1	-2.65834	18.2934	-8.91031	5.08919e-19
ENSSSCG00000004666	k3	2.79225	18.2464	8.89831	5.67034e-19
CDK2AP1	k3	5.08318	18.2432	8.89748	5.71277e-19
ND1	k2	-0.704252	18.2416	-8.89709	5.73277e-19
RSL24D1	k3	3.11907	18.2414	8.89704	5.73548e-19
ENSSSCG00000040782	k3	3.88619	18.2118	8.88946	6.14054e-19
WDR61	k3	3.39462	18.1924	8.88449	6.42118e-19
CDKN2AIPNL	k2	-4.12471	18.187	-8.88313	6.50056e-19
ENSSSCG00000002550	k2	-1.55934	18.1788	-8.88101	6.62579e-19
ENSSSCG00000005656	k2	-2.11595	18.1462	-8.87267	7.14112e-19
MICOS10	k2	-1.58709	18.1426	-8.87173	7.20159e-19
GPR18	k2	4.19367	18.1344	8.86965	7.33781e-19
NARS	k3	4.01541	18.1343	8.86962	7.33991e-19
COTL1	k2	-1.45374	18.1293	-8.86832	7.42569e-19
SMDT1	k1	-2.40534	18.1179	-8.8654	7.62285e-19
SDF2L1	k2	-5.53258	18.0812	-8.85598	8.29553e-19
CCDC167	k1	-5.81163	18.0794	-8.85552	8.32944e-19
BBS7	k2	-5.63831	18.0788	-8.85536	8.3412e-19
TKT	k3	3.9201	18.0631	8.85134	8.6476e-19
SSR2	k1	0.687733	18.0578	8.84999	8.75294e-19
ANAPC16	k3	1.89822	18.0356	8.84428	9.21222e-19
GPR18	k3	-5.17573	18.031	-8.8431	9.31018e-19
NDUFA11	k3	3.44557	18.0237	8.8412	9.46987e-19
DNAJA1	k2	1.09415	18.0182	8.83978	9.59064e-19
DDOST	k3	2.42605	18.011	8.83793	9.75084e-19
MCM3	k1	-5.84079	17.9791	-8.82973	1.04926e-18
EVI2B	k2	3.08196	17.9757	8.82884	1.05765e-18
ENSSSCG00000010158	k3	1.43298	17.9739	8.82839	1.0619e-18
HIST1H1D	k1	-5.65824	17.9704	-8.82748	1.07058e-18
MCM3	k2	-5.90669	17.9183	-8.81405	1.2071e-18
IFRD1	k2	5.24315	17.9165	8.81359	1.21196e-18
GNAI2	k3	2.22291	17.9086	8.81155	1.2343e-18
FKBP4	k3	2.85063	17.8871	8.80599	1.29702e-18
PLAAT3	k2	-5.72848	17.8796	-8.80407	1.31946e-18
ENSSSCG00000035762	k3	4.09329	17.8696	8.80149	1.35009e-18
MEA1	k1	-3.86994	17.8474	-8.79575	1.421e-18
ILK	k3	2.57496	17.8254	8.79005	1.49495e-18
HIST2H2AC	k3	6.90878	17.7939	8.78191	1.60729e-18
SMARCB1	k2	-5.63175	17.7892	-8.78069	1.62473e-18
RPL35	k2	-0.338352	17.7689	-8.77543	1.70246e-18
CDK2AP1	k1	-5.00939	17.7605	-8.77325	1.73576e-18
PCMT1	k1	-3.89897	17.7288	-8.76504	1.86704e-18
ENSSSCG00000009145	k1	-4.84915	17.7254	-8.76415	1.88191e-18
MCM3	k3	13.2213	17.7149	8.76142	1.928e-18
GMNN	k3	4.19314	17.7013	8.75789	1.98948e-18
CCDC167	k2	-5.81441	17.6987	-8.75722	2.00128e-18
PPM1G	k2	-5.55071	17.6947	-8.75618	2.01977e-18
ENSSSCG00000006665	k3	5.14994	17.6899	8.75494	2.04209e-18
PSMD13	k3	2.70997	17.6766	8.75147	2.10595e-18
VAPA	k1	-3.39533	17.6763	-8.75141	2.10701e-18
2021-09-09	k2	-5.77641	17.6707	-8.74996	2.13431e-18
ENSSSCG00000023158	k2	-2.32137	17.6683	-8.74933	2.14618e-18
SNRNP40	k3	9.19041	17.6585	8.74677	2.19553e-18
POLR2F	k3	1.99277	17.6347	8.74059	2.31902e-18
MGST3	k3	3.06273	17.6346	8.74057	2.31942e-18
ND3	k1	-0.746413	17.6264	-8.73842	2.36401e-18
RPL22	k3	-0.362196	17.6212	-8.73708	2.39222e-18
SKA2	k2	-5.44185	17.6064	-8.73322	2.47522e-18
ENSSSCG00000039740	k2	0.348655	17.5917	8.7294	2.56028e-18
CD40LG	k2	2.11119	17.5487	8.71819	2.8269e-18
PRMT1	k2	-2.96196	17.5428	-8.71666	2.86528e-18
PSMD13	k1	-2.7542	17.5404	-8.71601	2.88166e-18
TBCA	k2	-2.31007	17.5338	-8.71431	2.92543e-18
CTCF	k2	-5.62042	17.521	-8.71097	3.01285e-18
HDGF	k1	-5.29652	17.5151	-8.70942	3.05424e-18
RBBP7	k1	-5.81479	17.5144	-8.70924	3.05916e-18
PPIH	k2	-5.40833	17.5047	-8.70672	3.128e-18
SF3B2	k1	-2.29565	17.4868	-8.70202	3.26016e-18
ILK	k1	-2.88139	17.4431	-8.69061	3.60497e-18
ILF3	k1	-3.43294	17.4247	-8.68579	3.76114e-18
ENSSSCG00000034927	k3	4.49098	17.4184	8.68415	3.81587e-18
ENSSSCG00000003261	k3	2.5542	17.3998	8.67928	3.98281e-18
POLR2F	k1	-2.013	17.3994	-8.67918	3.98635e-18
PFDN2	k3	2.66649	17.3972	8.67859	4.00714e-18
PDIA6	k3	2.8255	17.3805	8.67422	4.16383e-18
MXD3	k1	-5.83227	17.3593	-8.66868	4.37177e-18
TMED9	k1	-2.41622	17.3366	-8.66271	4.60697e-18
CEBPB	k3	-2.16851	17.3287	-8.66064	4.69103e-18
ENSSSCG00000017555	k1	-2.17931	17.326	-8.65994	4.72028e-18
ENSSSCG00000035762	k2	-5.31039	17.3219	-8.65885	4.7653e-18
TRIB1	k2	4.24631	17.3202	8.65841	4.7839e-18
COX6A1	k1	-0.787515	17.2974	-8.65243	5.04146e-18
TPR	k3	1.79346	17.295	8.65178	5.07035e-18
MRPL40	k1	-5.34536	17.2821	-8.64841	5.22238e-18
TWF2	k3	3.74177	17.2436	8.63828	5.7067e-18
ENSSSCG00000011290	k3	3.13011	17.2409	8.63756	5.7427e-18
ENSSSCG00000034697	k1	-3.85509	17.2348	-8.63595	5.82419e-18
IL26	k2	-5.53968	17.2274	-8.63401	5.92385e-18
ARHGDIB	k2	0.522203	17.2177	8.63147	6.057e-18
CREM	k1	0.57185	17.1986	8.62641	6.33064e-18
MRPL40	k3	4.38747	17.1918	8.62464	6.42931e-18
LBR	k1	-3.4528	17.1782	-8.62104	6.6347e-18
FAM162A	k2	-5.57909	17.1767	-8.62065	6.65739e-18
RAP1B	k3	1.55308	17.1722	8.61946	6.72684e-18
CHCHD1	k1	-3.70056	17.1552	-8.61499	6.99473e-18
CCNB2	k1	-5.83275	17.1552	-8.61498	6.99562e-18
ENSSSCG00000039618	k1	-5.76214	17.0746	-8.59369	8.42199e-18
ENSSSCG00000009788	k1	-5.03397	17.073	-8.59326	8.45357e-18
MXD3	k3	13.0823	17.0715	8.59286	8.48283e-18
ENSSSCG00000001063	k3	-6.17814	17.0643	-8.59097	8.62411e-18
MAX	k1	-2.05185	17.0594	-8.58967	8.72194e-18
ID3	k1	-4.57167	17.0579	-8.58928	8.75193e-18
ENSSSCG00000034927	k1	-4.05499	17.0168	-8.57839	9.62143e-18
ARPC1B	k1	-0.753307	17.0166	-8.57833	9.62603e-18
DIABLO	k3	9.04727	17.0032	8.57481	9.92548e-18
ARF4	k2	1.78573	16.9749	8.56728	1.05959e-17
SRSF9	k3	4.88988	16.9435	8.55895	1.13901e-17
CENPU	k1	-5.82506	16.9353	-8.55678	1.16065e-17
SF3A3	k2	-5.3447	16.9342	-8.55649	1.16354e-17
ACYP1	k1	-5.73905	16.9313	-8.55572	1.17133e-17
PRDX4	k3	2.72699	16.9275	8.55471	1.18169e-17
CENPU	k2	-5.91447	16.9203	-8.55279	1.20148e-17
ARF3	k1	-5.60406	16.9121	-8.55063	1.2242e-17
CHCHD5	k3	4.51378	16.9044	8.54857	1.24621e-17
PUF60	k1	-2.93748	16.8897	-8.54466	1.2891e-17
NAXE	k1	-5.42804	16.8795	-8.54195	1.31977e-17
NDUFA10	k1	-5.80292	16.87	-8.53943	1.34882e-17
ECHS1	k2	-2.59683	16.8653	-8.53818	1.36352e-17
ENSSSCG00000017509	k3	-0.296126	16.8603	-8.53684	1.37942e-17
CCNB2	k3	13.2216	16.8589	8.53647	1.38381e-17
ENSSSCG00000003261	k1	-2.60273	16.8527	-8.53482	1.40373e-17
S100A4	k2	-2.89495	16.8416	-8.53185	1.44023e-17
NT5C	k1	-5.7219	16.8297	-8.52869	1.48013e-17
ENSSSCG00000007688	k3	2.24425	16.8181	8.52561	1.52006e-17
ENSSSCG00000010158	k2	-2.63414	16.8177	-8.52549	1.52158e-17
KIF20B	k2	-5.70095	16.816	-8.52503	1.5277e-17
DYNLT3	k1	-2.12761	16.8139	-8.52448	1.53492e-17
CDC20	k2	-5.60573	16.7965	-8.51983	1.59781e-17
SMARCB1	k1	-5.49303	16.7854	-8.51689	1.63891e-17
HIST2H2AC	k2	-5.5473	16.769	-8.5125	1.70219e-17
PPIG	k1	-2.80713	16.7671	-8.51198	1.70982e-17
TMCO1	k1	-2.44634	16.7166	-8.49851	1.92035e-17
EIF3F	k2	-5.85282	16.6922	-8.49199	2.03133e-17
ENSSSCG00000014540	k1	-0.349083	16.6903	-8.49146	2.04049e-17
CENPU	k3	13.0951	16.6429	8.47879	2.27539e-17
PLAAT3	k3	5.82042	16.6411	8.4783	2.28508e-17
ENSSSCG00000039618	k2	-5.76366	16.6403	-8.4781	2.28908e-17
CCNB2	k2	-5.79941	16.6392	-8.47778	2.29523e-17
2021-09-07	k1	-0.947138	16.6007	-8.46748	2.50756e-17
COX2	k1	0.173243	16.5899	8.46458	2.57071e-17
TRAPPC3	k1	-5.78192	16.5785	-8.4615	2.6396e-17
TNRC6B	k3	-6.08485	16.5762	-8.46089	2.65343e-17
NDUFA10	k3	11.6387	16.57	8.45924	2.69135e-17
RSL24D1	k1	-2.87544	16.5521	-8.45442	2.80486e-17
ENSSSCG00000003520	k3	0.886833	16.5258	8.44735	2.98001e-17
MRPS26	k2	-5.68206	16.5092	-8.44288	3.09616e-17
FABP5	k1	-4.31557	16.5019	-8.44093	3.14829e-17
HPF1	k3	3.46891	16.4924	8.43837	3.21807e-17
ENSSSCG00000013436	k2	-3.0972	16.4893	-8.43753	3.24109e-17
PSMC4	k3	3.13749	16.4841	8.43612	3.28051e-17
HADHA	k1	-5.79179	16.4161	-8.41781	3.83602e-17
[truncated: 4,406 more rows]

## Sheet: multidim_DGE
gene	D_KL	log.p.vals	log.p.adj	T.counts	p.val.adj	module
CD52	0.161045	-329.215	-325.104	1334	0	1
ENSSSCG00000036618	0.217922	-424.671	-420.561	1334	0	1
CREM	0.141183	-291.474	-287.364	1334	4.32914e-288	1
LAG3	0.133223	-254.591	-250.48	788	3.30901e-251	1
RPLP0	0.119856	-247.741	-243.631	1334	2.33884e-244	1
FOS	0.10321	-241.563	-237.452	1101	3.52884e-238	1
ENSSSCG00000004970	0.116631	-240.803	-236.693	1334	2.02908e-237	1
ENSSSCG00000012119	0.116395	-240.292	-236.182	1334	6.58225e-237	1
IFI6	0.105013	-215.039	-210.929	1334	1.17866e-211	1
ENSSSCG00000004489	0.0980692	-199.031	-194.921	1334	1.19983e-195	1
DUSP1	0.094147	-194.37	-190.259	819	5.50441e-191	1
RPL10	0.093746	-188.822	-184.711	1334	1.94351e-185	1
BTG1	0.0931634	-187.431	-183.321	1334	4.77452e-184	1
CD69	0.0917593	-184.066	-179.956	1334	1.10725e-180	1
SRSF5	0.0916001	-183.683	-179.573	1334	2.67404e-180	1
ENSSSCG00000031912	0.0899241	-179.637	-175.526	1334	2.97716e-176	1
IL10	0.125849	-175.907	-171.797	605	1.59572e-172	1
H3F3B	0.0861621	-170.445	-166.335	1334	4.62415e-167	1
EIF1	0.0848189	-167.127	-163.017	1334	9.61531e-164	1
GPR183	0.083838	-164.692	-160.582	1334	2.61961e-161	1
CTLA4	0.0740036	-163.526	-159.416	873	3.84093e-160	1
GLIPR2	0.103228	-161.118	-157.007	658	9.83417e-158	1
SRGN	0.0820409	-160.204	-156.093	1334	8.068e-157	1
ENSSSCG00000033697	0.0802408	-155.673	-151.562	1334	2.74042e-152	1
SAT1	0.079502	-153.803	-149.692	1334	2.03006e-150	1
ENSSSCG00000034448	0.079251	-153.166	-149.056	1334	8.79339e-150	1
RPL23	0.0789759	-152.468	-148.357	1334	4.3908e-149	1
RPS20	0.0789432	-152.385	-148.274	1334	5.31773e-149	1
ENSSSCG00000003042	0.0782085	-150.515	-146.405	1334	3.93714e-147	1
ENSSSCG00000038351	0.0719368	-147.861	-143.751	1136	1.77423e-144	1
ENSSSCG00000024973	0.0725491	-147.537	-143.426	1142	3.7474e-144	1
ENSSSCG00000033734	0.0767399	-146.76	-142.65	1334	2.24009e-143	1
ENSSSCG00000000635	0.0648202	-145.595	-141.485	910	3.27327e-142	1
ENSSSCG00000003930	0.0752738	-142.988	-138.878	1334	1.32447e-139	1
TRAT1	0.0605462	-138.756	-134.646	1002	2.2604e-135	1
ENSSSCG00000031088	0.0735239	-138.456	-134.346	1334	4.51046e-135	1
UBL3	0.0602898	-136.272	-132.162	946	6.88452e-133	1
HSPA8	0.072138	-134.843	-130.733	1334	1.85042e-131	1
RPS15	0.0714651	-133.082	-128.971	1334	1.0682e-129	1
ACTG1	0.0714464	-133.033	-128.922	1334	1.19626e-129	1
ENSSSCG00000037885	0.0710921	-132.103	-127.993	1334	1.01669e-128	1
TNFRSF1B	0.0685409	-130.807	-126.696	1162	2.01171e-127	1
IFNGR1	0.082983	-127.472	-123.361	651	4.35084e-124	1
B2M	0.0684799	-125.209	-121.098	1334	7.97163e-122	1
COX1	0.0683988	-124.994	-120.883	1334	1.30806e-121	1
ENSSSCG00000016758	0.0675338	-122.694	-118.584	1334	2.60655e-119	1
ENSSSCG00000014569	0.067473	-122.532	-118.422	1334	3.78331e-119	1
IFITM3	0.0674344	-122.43	-118.319	1334	4.79401e-119	1
ENSSSCG00000029160	0.0657393	-122.313	-118.203	791	6.26902e-119	1
IL7R	0.144881	-122.066	-117.956	485	1.10662e-118	1
ENSSSCG00000039460	0.0664812	-119.886	-115.776	1334	1.67615e-116	1
ENSSSCG00000006919	0.0795583	-115.08	-110.97	618	1.07209e-111	1
VMP1	0.064314	-114.069	-109.958	1334	1.10061e-110	1
RPL35	0.063623	-112.204	-108.094	1334	8.05853e-109	1
CXCR4	0.0633979	-111.596	-107.486	1334	3.2695e-108	1
UBB	0.0633488	-111.463	-107.353	1334	4.43912e-108	1
ENSSSCG00000035768	0.0629024	-110.255	-106.144	1334	7.17003e-107	1
LAPTM5	0.0624364	-108.992	-104.881	1334	1.31395e-105	1
RPSA	0.0623554	-108.772	-104.662	1334	2.18003e-105	1
RPL7A	0.0622097	-108.376	-104.266	1334	5.41889e-105	1
C15orf48	0.070792	-108.321	-104.211	663	6.15389e-105	1
RPS11	0.0621778	-108.29	-104.179	1334	6.61579e-105	1
ISG20	0.0649835	-107.881	-103.77	730	1.69753e-104	1
TCF7	0.0506426	-105.728	-101.618	952	2.4099e-102	1
ENSSSCG00000035080	0.0603324	-103.263	-99.1531	1334	7.02836e-100	1
DUT	0.0632899	-102.926	-98.8154	722	1.52962e-99	1
RPS23	0.0593707	-100.632	-96.5217	1334	3.00826e-97	1
ENSSSCG00000001229	0.0585986	-98.5139	-94.4035	1334	3.94878e-95	1
ENSSSCG00000036296	0.058598	-98.5122	-94.4019	1334	3.96392e-95	1
RPS12	0.0582403	-97.5292	-93.4189	1334	3.81167e-94	1
COX3	0.0582039	-97.4293	-93.3189	1334	4.79814e-94	1
BST2	0.0558583	-96.943	-92.8327	1162	1.47007e-93	1
TUBA4A	0.0470142	-92.4445	-88.3341	928	4.63335e-89	1
PIK3R1	0.0510446	-91.6464	-87.536	824	2.9104e-88	1
STX11	0.0614319	-91.1129	-87.0025	665	9.94167e-88	1
IL4R	0.0842189	-91.0639	-86.9535	527	1.11291e-87	1
BTG2	0.045355	-88.541	-84.4306	990	3.7102e-85	1
DUSP5	0.0717254	-88.3617	-84.2514	563	5.60595e-85	1
ENSSSCG00000029830	0.0537105	-84.9989	-80.8886	1334	1.29244e-81	1
CCR7	0.115838	-84.3235	-80.2131	453	6.12209e-81	1
ENSSSCG00000034617	0.0534591	-84.2997	-80.1894	1334	6.4656e-81	1
DNAJB1	0.0441267	-84.074	-79.9637	1001	1.08724e-80	1
DDIT4	0.0433447	-81.7014	-77.591	988	2.56427e-78	1
TPT1	0.0524347	-81.4464	-77.336	1334	4.61287e-78	1
RGCC	0.0548768	-81.2817	-77.1714	1243	6.73924e-78	1
RPS17	0.0521134	-80.5506	-76.4403	1334	3.62864e-77	1
TUBA1B	0.051947	-80.0864	-75.976	1334	1.05681e-76	1
NFKBIB	0.0461665	-79.1697	-75.0594	1111	8.72184e-76	1
HMGB2	0.0511882	-77.9678	-73.8575	1334	1.38844e-74	1
CHORDC1	0.0651963	-77.6614	-73.551	559	2.81181e-74	1
ENSSSCG00000021591	0.051077	-77.6574	-73.5471	1334	2.83751e-74	1
TUBB	0.0479307	-77.55	-73.4397	785	3.63339e-74	1
EMB	0.0419188	-76.9154	-72.8051	970	1.5665e-73	1
RPS9	0.050598	-76.3187	-72.2083	1334	6.18964e-73	1
UBALD2	0.0563672	-76.0407	-71.9303	622	1.17398e-72	1
CORO1A	0.0504627	-75.9404	-71.83	1334	1.47911e-72	1
ENSSSCG00000039544	0.0501095	-74.9527	-70.8424	1334	1.4376e-71	1
CTSW	0.0986218	-74.8824	-70.7721	460	1.69013e-71	1
HINT1	0.0497829	-74.0391	-69.9288	1334	1.17824e-70	1
RPS27	0.0492689	-72.6008	-68.4905	1334	3.23243e-69	1
RPS18	0.0492445	-72.5324	-68.422	1334	3.78412e-69	1
PNRC1	0.0488974	-71.5608	-67.4505	1334	3.54418e-68	1
RPS3A	0.0488276	-71.3653	-67.2549	1334	5.56006e-68	1
GRAMD2B	0.061841	-71.0462	-66.9358	553	1.15922e-67	1
HSP90AA1	0.0486553	-70.883	-66.7726	1334	1.68793e-67	1
MANF	0.0411249	-70.4983	-66.3879	888	4.09341e-67	1
RACK1	0.0483809	-70.1145	-66.0042	1334	9.90391e-67	1
ENSSSCG00000039658	0.0392981	-67.3999	-63.2896	937	5.13374e-64	1
HIF1A	0.0396002	-66.8616	-62.7513	905	1.77298e-63	1
RPL11	0.0472157	-66.8509	-62.7406	1334	1.81737e-63	1
RPS5	0.0469945	-66.2312	-62.1209	1334	7.57057e-63	1
PTPRCAP	0.0468202	-65.743	-61.6327	1334	2.3299e-62	1
ZFP36L1	0.0465295	-64.929	-60.8187	1334	1.51814e-61	1
RPL39	0.0464645	-64.747	-60.6367	1334	2.30855e-61	1
ICAM2	0.0412551	-64.2423	-60.132	821	7.37956e-61	1
RPL34	0.0461293	-63.8084	-59.698	1334	2.00435e-60	1
RPL6	0.0460857	-63.6862	-59.5758	1334	2.65552e-60	1
CCR9	0.0889924	-63.5167	-59.4064	449	3.92305e-60	1
ZNRF1	0.0404572	-63.2592	-59.1488	833	7.09834e-60	1
ENSSSCG00000035520	0.0449214	-63.1152	-59.0048	726	9.88961e-60	1
NAF1	0.0578954	-63.1136	-59.0033	545	9.92496e-60	1
RALA	0.0457324	-63.1057	-58.9953	707	1.0108e-59	1
CYTB	0.0456464	-62.4564	-58.3461	1334	4.5075e-59	1
ENSSSCG00000013889	0.0455925	-62.3056	-58.1952	1334	6.37935e-59	1
ENSSSCG00000011272	0.0454026	-61.774	-57.6637	1334	2.16932e-58	1
LGMN	0.0452679	-61.3972	-57.2868	1334	5.16639e-58	1
REL	0.0404097	-60.9385	-56.8282	812	1.48537e-57	1
ATP2B1	0.0664612	-60.5696	-56.4592	501	3.47355e-57	1
CALM3	0.0372093	-60.0483	-55.9379	1008	1.15369e-56	1
RORA	0.043826	-59.9286	-55.8182	719	1.51979e-56	1
PPP1R15A	0.0454603	-59.8312	-55.7208	1221	1.90175e-56	1
TIMP1	0.0453587	-59.5586	-55.4482	674	3.56272e-56	1
DDX5	0.0444266	-59.0444	-54.9341	1334	1.16396e-55	1
ENSSSCG00000033019	0.0443928	-58.9499	-54.8395	1334	1.44699e-55	1
PCED1B	0.0431375	-58.9032	-54.7929	725	1.61112e-55	1
PMAIP1	0.0501061	-58.3409	-54.2306	580	5.88067e-55	1
ZFP36L2	0.0440683	-58.0434	-53.933	1334	1.16682e-54	1
S1PR1	0.107429	-58.0289	-53.9186	383	1.20626e-54	1
CTSC	0.0438672	-57.4817	-53.3714	1334	4.25239e-54	1
RPS16	0.0438074	-57.3145	-53.2042	1334	6.24917e-54	1
RPL37	0.0435472	-56.5884	-52.4781	1334	3.32601e-53	1
RAC2	0.0434291	-56.2588	-52.1484	1334	7.10536e-53	1
PTMA	0.0433751	-56.1083	-51.998	1334	1.00472e-52	1
PTPRC	0.0433201	-55.9548	-51.8444	1334	1.43084e-52	1
RPL3	0.0432433	-55.7407	-51.6304	1334	2.34225e-52	1
ENSSSCG00000011234	0.0481425	-55.4323	-51.322	583	4.76457e-52	1
ENSSSCG00000014855	0.0430078	-55.0842	-50.9739	1334	1.06203e-51	1
PDE4B	0.0459958	-55.0519	-50.9416	609	1.14401e-51	1
CD3G	0.0429889	-55.0315	-50.9212	1334	1.19905e-51	1
INSIG1	0.0607186	-54.9061	-50.7957	504	1.60066e-51	1
GPX1	0.0353835	-54.5861	-50.4758	975	3.34358e-51	1
GPR171	0.103124	-53.6706	-49.5602	370	2.75282e-50	1
RPL17-C18orf32	0.0424963	-53.6596	-49.5493	1334	2.82317e-50	1
CCL5	0.035484	-53.5537	-49.4433	904	3.60329e-50	1
ENSSSCG00000037081	0.0424007	-53.3934	-49.283	1334	5.21151e-50	1
ACTB	0.0422336	-52.9288	-48.8184	1334	1.51906e-49	1
NFKBIA	0.0406823	-52.9264	-48.8161	1174	1.5273e-49	1
RPS4X	0.0422225	-52.8978	-48.7874	1334	1.63147e-49	1
ENSSSCG00000024974	0.0421295	-52.6392	-48.5288	1334	2.95906e-49	1
ENSSSCG00000035811	0.0419974	-52.272	-48.1616	1334	6.89273e-49	1
NR4A2	0.034697	-52.0021	-47.8917	934	1.28319e-48	1
STMN1	0.035063	-51.3124	-47.2021	1036	6.27974e-48	1
CD3E	0.0413893	-50.584	-46.4737	1334	3.35981e-47	1
PDE4D	0.0622572	-50.4203	-46.3099	483	4.89878e-47	1
ELF1	0.0411804	-50.0049	-45.8945	1334	1.27482e-46	1
ENSSSCG00000016100	0.034861	-49.9953	-45.8849	874	1.30337e-46	1
XBP1	0.0360776	-49.9734	-45.8631	824	1.37064e-46	1
COX2	0.0410973	-49.7748	-45.6644	1334	2.16572e-46	1
ENSSSCG00000017239	0.0410689	-49.6959	-45.5856	1334	2.59663e-46	1
CRTAM	0.0841256	-49.3897	-45.2794	409	5.25588e-46	1
MOB3A	0.0536633	-48.7522	-44.6418	513	2.28131e-45	1
ENSSSCG00000004945	0.0406196	-48.4529	-44.3425	1334	4.54447e-45	1
KDM6B	0.0753211	-48.3622	-44.2519	432	5.59903e-45	1
NANS	0.0335665	-48.2115	-44.1011	931	7.92244e-45	1
FABP3	0.0914504	-48.1585	-44.0481	376	8.95114e-45	1
ND2	0.0405086	-48.1462	-44.0359	1334	9.20748e-45	1
DNAJA1	0.0404335	-47.9386	-43.8283	1334	1.48495e-44	1
ENSSSCG00000039046	0.0404029	-47.8541	-43.7437	1334	1.80407e-44	1
ACP1	0.0332794	-47.4697	-43.3594	944	4.3713e-44	1
NPM3	0.0929343	-47.4109	-43.3005	364	5.00566e-44	1
BCL2A1	0.0342485	-47.269	-43.1587	860	6.93936e-44	1
AKR1B1	0.0948399	-47.2077	-43.0973	354	7.99239e-44	1
ITGB7	0.0540311	-47.1295	-43.0192	505	9.56856e-44	1
ENSSSCG00000016902	0.0539334	-47.0092	-42.8989	505	1.26215e-43	1
ENSSSCG00000025928	0.0400894	-46.9892	-42.8788	1334	1.3219e-43	1
FABP6	0.147922	-46.9073	-42.7969	255	1.59615e-43	1
SMC6	0.0353231	-46.8429	-42.7326	811	1.85118e-43	1
IL18R1	0.0624874	-46.8046	-42.6942	469	2.02188e-43	1
SCML4	0.0890009	-46.6319	-42.5215	375	3.00935e-43	1
AP2S1	0.0352743	-46.3231	-42.2128	806	6.12649e-43	1
CXCR6	0.129812	-45.6934	-41.5831	268	2.61184e-42	1
ENSSSCG00000036114	0.0409276	-45.6474	-41.5371	1279	2.90362e-42	1
ENSSSCG00000014565	0.0394845	-45.3238	-41.2135	1334	6.11665e-42	1
CTSB	0.0357725	-45.248	-41.1377	775	7.28328e-42	1
HSD11B1L	0.0394072	-45.1114	-41.0011	1334	9.97583e-42	1
ENSSSCG00000033385	0.0935093	-45.0681	-40.9577	342	1.1023e-41	1
ENSSSCG00000015447	0.0605871	-44.9522	-40.8418	469	1.43941e-41	1
ELL2	0.102215	-44.9386	-40.8282	311	1.48511e-41	1
ENSSSCG00000028485	0.039133	-44.3587	-40.2484	1334	5.64439e-41	1
HSPA5	0.0390982	-44.2631	-40.1527	1334	7.03535e-41	1
IFRD1	0.0756727	-44.1313	-40.021	411	9.52805e-41	1
NME1	0.043342	-44.0722	-39.9618	563	1.09187e-40	1
ANXA2	0.0453179	-43.6166	-39.5063	542	3.11688e-40	1
LSM2	0.034346	-43.5095	-39.3992	802	3.98862e-40	1
NKG7	0.0411642	-43.2957	-39.1853	585	6.52656e-40	1
PECAM1	0.17616	-43.2787	-39.1683	229	6.78707e-40	1
ENSSSCG00000017509	0.0387128	-43.2075	-39.0972	1334	7.99476e-40	1
ZFP36	0.0356702	-43.1564	-39.046	750	8.9945e-40	1
SMIM3	0.106617	-42.8167	-38.7063	290	1.96634e-39	1
RPS26	0.0383704	-42.2718	-38.1614	1334	6.89555e-39	1
ENSSSCG00000016903	0.0551564	-42.1172	-38.0068	480	9.84401e-39	1
ENSSSCG00000006418	0.0381772	-41.9587	-37.8484	1214	1.41777e-38	1
TRAF3IP3	0.0357242	-41.7565	-37.6462	1153	2.25845e-38	1
RPS6	0.0381423	-41.6499	-37.5395	1334	2.88715e-38	1
ENSSSCG00000004963	0.0326138	-41.6422	-37.5319	847	2.93839e-38	1
ENSSSCG00000039071	0.0380776	-41.4737	-37.3633	1334	4.3321e-38	1
TPM4	0.0561436	-41.2438	-37.1335	472	7.35439e-38	1
RPL9	0.0379912	-41.2382	-37.1279	1334	7.44927e-38	1
CD99	0.032038	-41.1079	-36.9976	1038	1.00563e-37	1
RPL26	0.0378278	-40.7939	-36.6835	1334	2.07251e-37	1
SNRPD1	0.0320285	-40.7292	-36.6189	1044	2.40494e-37	1
ENSSSCG00000009303	0.0377665	-40.6273	-36.5169	1334	3.04148e-37	1
SASH3	0.0311706	-40.558	-36.4476	952	3.56772e-37	1
YWHAB	0.0376361	-40.2729	-36.1626	1334	6.87773e-37	1
DENND2D	0.0374244	-39.4078	-35.2975	619	5.04102e-36	1
ENSSSCG00000017928	0.0350457	-39.4007	-35.2904	714	5.12436e-36	1
ENSSSCG00000004145	0.0371899	-39.0638	-34.9534	1334	1.11325e-35	1
DYNLL1	0.032989	-39.0504	-34.94	1104	1.14805e-35	1
TSPO	0.0397614	-38.9589	-34.8486	570	1.41716e-35	1
SAMHD1	0.0351396	-38.7621	-34.6518	698	2.22953e-35	1
SARNP	0.0402065	-38.6584	-34.5481	562	2.83086e-35	1
TRAF4	0.0723766	-38.5429	-34.4325	390	3.69392e-35	1
ENSSSCG00000036716	0.0369354	-38.3764	-34.266	1334	5.4198e-35	1
VIM	0.0352833	-38.0021	-33.8917	675	1.28321e-34	1
HSBP1	0.0368797	-37.903	-33.7926	613	1.61209e-34	1
ENSSSCG00000008170	0.0366496	-37.606	-33.4956	1334	3.19446e-34	1
HSP90AB1	0.0366342	-37.5645	-33.4542	1334	3.51436e-34	1
GPR18	0.0520519	-37.4568	-33.3464	474	4.50395e-34	1
SLC1A5	0.149686	-37.3833	-33.273	229	5.33387e-34	1
RPL7	0.0363905	-36.9094	-32.799	1334	1.58855e-33	1
SH2D2A	0.0394855	-36.9006	-32.7903	558	1.62083e-33	1
CST7	0.0330529	-36.7392	-32.6289	1129	2.35036e-33	1
POLR2G	0.0347651	-36.5816	-32.4713	668	3.37853e-33	1
LAX1	0.0312391	-36.5254	-32.4151	826	3.84539e-33	1
ENSSSCG00000037030	0.0362367	-36.4966	-32.3863	1334	4.1088e-33	1
SEC62	0.0312401	-36.1949	-32.0846	820	8.2303e-33	1
ENSSSCG00000027491	0.0307012	-36.0058	-31.8954	845	1.2722e-32	1
DYNLT1	0.0747515	-35.8729	-31.7626	352	1.72756e-32	1
SERPINB1	0.0950743	-35.8604	-31.75	280	1.77826e-32	1
BCL2L11	0.0768175	-35.6745	-31.5641	338	2.72836e-32	1
ENSSSCG00000033721	0.0358831	-35.5504	-31.4401	1334	3.63025e-32	1
CXCR3	0.064543	-35.4953	-31.385	406	4.12132e-32	1
CCT5	0.0296836	-35.1148	-31.0044	995	9.89867e-32	1
IKZF3	0.0309274	-34.9549	-30.8446	813	1.4303e-31	1
H2AFZ	0.0355347	-34.6216	-30.5112	1334	3.08157e-31	1
PFN1	0.0355019	-34.5344	-30.424	1334	3.76702e-31	1
ND1	0.0354553	-34.4103	-30.2999	1334	5.01269e-31	1
ENSSSCG00000027573	0.0354204	-34.3175	-30.2072	1334	6.20647e-31	1
PLAC8	0.0353858	-34.2256	-30.1153	1334	7.66853e-31	1
SNRPD3	0.0313404	-34.2148	-30.1044	780	7.86242e-31	1
PLAGL1	0.0395033	-34.0025	-29.8921	538	1.282e-30	1
PIM1	0.0590015	-33.9957	-29.8854	423	1.30204e-30	1
UBE2L6	0.0294993	-33.9132	-29.8029	1014	1.57447e-30	1
ENSSSCG00000006260	0.0435224	-33.8756	-29.7653	505	1.71689e-30	1
LXN	0.0340904	-33.6843	-29.5739	635	2.66728e-30	1
TNFAIP3	0.0340831	-33.5134	-29.403	1191	3.95343e-30	1
HSPE1	0.0350883	-33.4366	-29.3263	1334	4.7178e-30	1
MIA3	0.0417161	-33.3293	-29.219	515	6.03986e-30	1
NDUFA6	0.0330305	-33.1778	-29.0675	676	8.56063e-30	1
PNP	0.0716464	-33.1363	-29.026	342	9.419e-30	1
TWF2	0.0361099	-33.0295	-28.9192	574	1.2046e-29	1
EEF2	0.0349141	-32.976	-28.8656	1334	1.36261e-29	1
TSC22D3	0.0435404	-32.7667	-28.6563	499	2.20625e-29	1
PRDM1	0.106165	-32.7257	-28.6153	251	2.42493e-29	1
RGS1	0.0347989	-32.6719	-28.5616	1334	2.74431e-29	1
NFKB1	0.0423184	-32.5019	-28.3916	506	4.05927e-29	1
PSMB7	0.0293254	-32.4232	-28.3129	853	4.86536e-29	1
ENSSSCG00000037071	0.0412747	-32.3725	-28.2621	513	5.46882e-29	1
GPX4	0.0346602	-32.3063	-28.196	1334	6.36814e-29	1
POMP	0.0353627	-32.1172	-28.0069	1276	9.84268e-29	1
ENSSSCG00000022912	0.0289563	-32.0145	-27.9042	1018	1.2469e-28	1
ENSSSCG00000006830	0.033862	-31.8276	-27.7173	610	1.91746e-28	1
KARS	0.0284623	-31.6691	-27.5588	969	2.76193e-28	1
MISP3	0.0366878	-31.6232	-27.5129	553	3.06991e-28	1
EVI2B	0.0285198	-31.5868	-27.4765	903	3.33828e-28	1
ENSSSCG00000007088	0.0345365	-31.581	-27.4707	1234	3.38318e-28	1
CD40LG	0.0284055	-31.3005	-27.1901	981	6.45478e-28	1
BCAS2	0.0292835	-31.2224	-27.112	1056	7.72669e-28	1
MDH1	0.0294922	-31.1376	-27.0272	814	9.39266e-28	1
ENSSSCG00000018063	0.0339419	-31.1067	-26.9964	1218	1.00835e-27	1
PTBP1	0.0285441	-31.0405	-26.9302	878	1.17445e-27	1
MRPL12	0.0301133	-30.8513	-26.741	775	1.81567e-27	1
RGS2	0.0335347	-30.809	-26.6987	604	2.00126e-27	1
MDFIC	0.0493211	-30.6731	-26.5628	453	2.73682e-27	1
ANAPC16	0.0283779	-30.6463	-26.5359	1004	2.9111e-27	1
CD63	0.0317051	-30.6456	-26.5353	1153	2.91546e-27	1
ENSSSCG00000029857	0.0309082	-30.5539	-26.4436	728	3.60118e-27	1
ENSSSCG00000036224	0.0289722	-30.5414	-26.4311	832	3.70616e-27	1
COQ10B	0.0392707	-30.4645	-26.3541	518	4.42445e-27	1
SLC25A5	0.0346013	-30.4513	-26.341	1302	4.56064e-27	1
ENSSSCG00000013597	0.0339176	-30.361	-26.2507	1334	5.6148e-27	1
PPIL4	0.0362768	-30.3308	-26.2204	548	6.01937e-27	1
MCL1	0.0283299	-30.1351	-26.0248	869	9.44599e-27	1
ESD	0.029053	-30.0362	-25.9258	1064	1.1862e-26	1
ENSSSCG00000024696	0.0887513	-30.0005	-25.8902	265	1.28772e-26	1
HIKESHI	0.0284845	-29.8926	-25.7822	1033	1.65119e-26	1
ENSSSCG00000040273	0.0337083	-29.8164	-25.706	1334	1.96785e-26	1
ID2	0.0336846	-29.7546	-25.6443	1334	2.26836e-26	1
CAMK4	0.0349982	-29.63	-25.5197	560	3.0222e-26	1
CNN2	0.0289029	-29.5146	-25.4043	1065	3.94219e-26	1
RANBP1	0.0279662	-29.4224	-25.3121	881	4.87471e-26	1
TMEM156	0.0310497	-29.4161	-25.3057	691	4.94612e-26	1
SLC25A6	0.0335458	-29.3947	-25.2843	1334	5.19635e-26	1
ENSSSCG00000006380	0.0309854	-29.1413	-25.0309	687	9.31243e-26	1
RAB12	0.0775399	-29.1268	-25.0165	285	9.62748e-26	1
ENSSSCG00000035048	0.0324317	-29.0621	-24.9517	610	1.11759e-25	1
DNTTIP2	0.0318241	-29.0499	-24.9395	634	1.14947e-25	1
NDUFS4	0.030888	-29.0294	-24.9191	690	1.2048e-25	1
SLC25A3	0.0333984	-29.0131	-24.9028	1334	1.25088e-25	1
RGS10	0.0430013	-28.9084	-24.798	481	1.59221e-25	1
RPLP2	0.0333492	-28.8859	-24.7756	1334	1.67653e-25	1
RPL22	0.0333482	-28.8833	-24.773	1334	1.68669e-25	1
CGAS	0.0750818	-28.7778	-24.6674	290	2.15082e-25	1
FURIN	0.0678845	-28.6701	-24.5598	318	2.75561e-25	1
DKC1	0.0551971	-28.6621	-24.5518	406	2.80681e-25	1
JMY	0.0494106	-28.6526	-24.5422	440	2.86917e-25	1
ATP5MC3	0.0284126	-28.633	-24.5226	1054	3.00188e-25	1
ATP6	0.0331931	-28.4831	-24.3728	1334	4.23861e-25	1
ENSSSCG00000010954	0.0282045	-28.3043	-24.1939	1048	6.39855e-25	1
SNRPN	0.0297113	-28.2829	-24.1725	740	6.72203e-25	1
ENSSSCG00000023323	0.0425191	-28.1953	-24.085	480	8.22307e-25	1
NOP58	0.0309287	-28.1936	-24.0832	661	8.25598e-25	1
IL21R	0.0356821	-28.1214	-24.011	538	9.7497e-25	1
ARL6IP5	0.0274307	-28.0683	-23.958	988	1.1016e-24	1
ENSSSCG00000017671	0.0288716	-28.063	-23.9526	782	1.1152e-24	1
FUS	0.0273812	-27.9775	-23.8672	985	1.35771e-24	1
ENSSSCG00000026064	0.0271356	-27.6771	-23.5668	945	2.71158e-24	1
SAMD9	0.0335461	-27.6765	-23.5661	565	2.7158e-24	1
RUNX3	0.0885309	-27.6219	-23.5115	255	3.07939e-24	1
SERPINB9	0.0605075	-27.6028	-23.4925	356	3.2175e-24	1
ENSSSCG00000011952	0.0328471	-27.5939	-23.4836	1334	3.28405e-24	1
SRSF7	0.0315672	-27.5354	-23.425	1186	3.75837e-24	1
PLGRKT	0.0310228	-27.3579	-23.2476	632	5.65464e-24	1
NR4A3	0.0805731	-27.3324	-23.2221	268	5.99675e-24	1
SMARCA5	0.0326844	-27.1777	-23.0673	1334	8.56365e-24	1
PLAGL2	0.0634883	-27.1525	-23.0422	328	9.07436e-24	1
BHLHE40	0.0557878	-27.1244	-23.0141	388	9.68079e-24	1
ENSSSCG00000006395	0.0332572	-27.1054	-22.995	1293	1.01148e-23	1
RAP1A	0.0326559	-27.1048	-22.9945	1334	1.01278e-23	1
ND4	0.0326481	-27.0851	-22.9748	1334	1.05984e-23	1
SS18L2	0.0269238	-27.0159	-22.9055	928	1.24298e-23	1
GPD1	0.029062	-26.846	-22.7357	742	1.83794e-23	1
HMGA1	0.0390776	-26.8456	-22.7353	497	1.83969e-23	1
FTL	0.0325393	-26.8076	-22.6972	1334	2.00801e-23	1
LYSMD2	0.0897561	-26.6279	-22.5175	249	3.03738e-23	1
CHMP5	0.0619725	-26.4433	-22.3329	330	4.6457e-23	1
LMO4	0.0377148	-26.3266	-22.2162	505	6.07844e-23	1
PHB2	0.0282868	-26.236	-22.1256	773	7.48784e-23	1
FOSL2	0.060888	-26.2153	-22.1049	335	7.85423e-23	1
NUCKS1	0.0275808	-25.9922	-21.8818	1056	1.31279e-22	1
FBL	0.0307397	-25.9574	-21.8471	613	1.4221e-22	1
RPIA	0.0389626	-25.9346	-21.8242	492	1.49888e-22	1
NDUFS8	0.0266098	-25.8556	-21.7452	969	1.79788e-22	1
IRF2BP2	0.0278475	-25.8248	-21.7144	790	1.93014e-22	1
ANAPC13	0.0289917	-25.7976	-21.6873	718	2.05459e-22	1
ENSSSCG00000038507	0.0321133	-25.7265	-21.6161	1334	2.42035e-22	1
ENSSSCG00000011237	0.0411516	-25.7232	-21.6128	474	2.43884e-22	1
PFKFB3	0.0613101	-25.7126	-21.6022	326	2.49891e-22	1
IFNG	0.0468986	-25.7086	-21.5982	435	2.52207e-22	1
ARPC4	0.0322922	-25.6631	-21.5527	1325	2.80083e-22	1
PGK1	0.0303496	-25.653	-21.5427	623	2.86639e-22	1
ITGA4	0.030904	-25.6384	-21.5281	601	2.96438e-22	1
ENSSSCG00000040782	0.0357692	-25.5655	-21.4552	518	3.50622e-22	1
NAP1L1	0.0320428	-25.5483	-21.438	1334	3.64776e-22	1
TFF3	0.205514	-25.5458	-21.4355	164	3.66889e-22	1
JCHAIN	0.0539712	-25.4905	-21.3801	384	4.16764e-22	1
CCDC167	0.0875019	-25.3624	-21.2521	247	5.59693e-22	1
APOBEC3B	0.0318343	-25.3395	-21.2292	572	5.89965e-22	1
HSPB1	0.0319013	-25.1915	-21.0812	1334	8.29519e-22	1
ENSSSCG00000029596	0.0349371	-25.1875	-21.0772	524	8.37183e-22	1
ENSSSCG00000013232	0.0489912	-25.1801	-21.0698	417	8.51573e-22	1
SUGT1	0.0308059	-25.1654	-21.0551	596	8.80941e-22	1
ENSSSCG00000037775	0.0318885	-25.1593	-21.049	1334	8.93316e-22	1
PCNA	0.0277942	-25.1484	-21.0381	776	9.16047e-22	1
SNX9	0.195132	-25.055	-20.9446	167	1.13597e-21	1
ICOS	0.0280748	-25.0144	-20.9041	1097	1.24717e-21	1
CAPZA2	0.028855	-24.9727	-20.8623	1128	1.37295e-21	1
ELOC	0.0263001	-24.8544	-20.744	896	1.8029e-21	1
NDUFV2	0.028044	-24.8431	-20.7328	752	1.85032e-21	1
OXA1L	0.0345941	-24.8208	-20.7104	525	1.94789e-21	1
ENSSSCG00000017749	0.027971	-24.7834	-20.673	1096	2.12308e-21	1
ENSSSCG00000004349	0.0772406	-24.774	-20.6636	262	2.16966e-21	1
ADH5	0.0300105	-24.7346	-20.6243	617	2.37525e-21	1
FKBP11	0.0320726	-24.7267	-20.6163	1261	2.41922e-21	1
ENSSSCG00000020830	0.031667	-24.6034	-20.493	1334	3.21361e-21	1
SH3BGRL3	0.0316407	-24.5375	-20.4272	1334	3.7396e-21	1
PARP12	0.0565225	-24.4413	-20.3309	347	4.66764e-21	1
PSMB4	0.0270876	-24.1574	-20.047	1063	8.97399e-21	1
RSBN1L	0.0356071	-24.1118	-20.0014	509	9.96764e-21	1
RABGEF1	0.0521982	-24.0067	-19.8964	381	1.26946e-20	1
CEBPB	0.0259544	-23.9968	-19.8865	957	1.29872e-20	1
LCK	0.0314211	-23.9889	-19.8786	1334	1.32263e-20	1
CCT2	0.0292594	-23.9373	-19.827	1156	1.48945e-20	1
ACOT7	0.0422839	-23.8757	-19.7653	453	1.71667e-20	1
SNRPF	0.0266045	-23.85	-19.7397	1039	1.82103e-20	1
DAPL1	0.0484162	-23.8256	-19.7152	409	1.92646e-20	1
RBM17	0.0319685	-23.708	-19.5977	551	2.52546e-20	1
CIRBP	0.0312861	-23.653	-19.5427	1334	2.86619e-20	1
CD1D	0.0442611	-23.6282	-19.5178	437	3.03521e-20	1
SMC4	0.0274777	-23.622	-19.5117	755	3.07826e-20	1
UCHL3	0.0489168	-23.5925	-19.4822	403	3.29463e-20	1
EEF1B2	0.0312582	-23.5839	-19.4735	1334	3.36102e-20	1
LSM6	0.0305743	-23.5833	-19.473	578	3.36537e-20	1
ENSSSCG00000018061	0.0257449	-23.4017	-19.2914	953	5.11222e-20	1
ENSSSCG00000035256	0.0601948	-23.393	-19.2826	308	5.21646e-20	1
ENSA	0.0261524	-23.3385	-19.2281	846	5.91361e-20	1
SEC11C	0.0267685	-23.2744	-19.164	794	6.85436e-20	1
KPNB1	0.0336206	-23.0472	-18.9369	522	1.1564e-19	1
ARID5B	0.026066	-22.9948	-18.8844	842	1.30485e-19	1
LY96	0.025603	-22.9704	-18.86	908	1.38024e-19	1
NDUFC2	0.0263072	-22.8371	-18.7268	1042	1.87589e-19	1
SDF4	0.0270441	-22.8164	-18.706	1085	1.96774e-19	1
PARVG	0.0283625	-22.8036	-18.6933	658	2.02636e-19	1
DDX3X	0.0309986	-22.785	-18.6747	1331	2.11511e-19	1
ENSSSCG00000023595	0.0678962	-22.7271	-18.6168	273	2.41683e-19	1
FAM185A	0.0782496	-22.718	-18.6076	250	2.46819e-19	1
CD28	0.0269578	-22.6734	-18.563	763	2.73499e-19	1
ENSSSCG00000008383	0.0401371	-22.6698	-18.5595	460	2.75769e-19	1
COA3	0.0357341	-22.6611	-18.5507	497	2.81385e-19	1
HSPH1	0.0274593	-22.6228	-18.5125	1107	3.07286e-19	1
ENSSSCG00000012916	0.0264619	-22.6168	-18.5065	1057	3.11551e-19	1
ENSSSCG00000016737	0.0308238	-22.5107	-18.4004	1334	3.97751e-19	1
SNRPC	0.0254002	-22.464	-18.3537	924	4.42944e-19	1
SELENOH	0.0303937	-22.3915	-18.2811	566	5.23434e-19	1
ENSSSCG00000014540	0.0307296	-22.2793	-18.1689	1334	6.77801e-19	1
ILF2	0.0261102	-22.2437	-18.1333	813	7.35674e-19	1
EIF4A2	0.0307081	-22.2267	-18.1163	1334	7.65002e-19	1
GON7	0.0323664	-22.1555	-18.0451	530	9.0134e-19	1
ATF4	0.0306708	-22.1354	-18.025	1334	9.43978e-19	1
UQCRQ	0.0278511	-22.1287	-18.0183	1130	9.58698e-19	1
ENSSSCG00000011121	0.0290766	-22.0272	-17.9168	597	1.21115e-18	1
ENSSSCG00000005453	0.0309811	-21.9578	-17.8474	1276	1.42091e-18	1
B4GALT1	0.03903	-21.9224	-17.812	463	1.54167e-18	1
ENSSSCG00000035762	0.0482277	-21.9033	-17.793	390	1.61067e-18	1
PTGER4	0.0338462	-21.8847	-17.7743	510	1.68143e-18	1
PRDX6	0.0252354	-21.8808	-17.7705	904	1.69638e-18	1
YWHAQ	0.0270714	-21.8002	-17.6898	727	2.04248e-18	1
LEF1	0.0597991	-21.6611	-17.5507	294	2.81382e-18	1
PHKG2	0.0363913	-21.6159	-17.5056	483	3.12181e-18	1
IFI30	0.0365855	-21.5818	-17.4714	481	3.37746e-18	1
MRPL34	0.0369208	-21.5763	-17.4659	478	3.42037e-18	1
TRAM1	0.0264076	-21.5564	-17.446	1075	3.58079e-18	1
ENSSSCG00000028397	0.0250915	-21.5561	-17.4457	919	3.58346e-18	1
HMGN2	0.0304304	-21.5483	-17.4379	1334	3.64822e-18	1
SHISA5	0.0264573	-21.4674	-17.357	762	4.39498e-18	1
ENSSSCG00000001456	0.0337124	-21.4607	-17.3504	508	4.46315e-18	1
SERPINF1	0.0252651	-21.4332	-17.3228	867	4.75501e-18	1
OAZ1	0.0303793	-21.4242	-17.3138	1334	4.85484e-18	1
ENSSSCG00000013064	0.0303726	-21.4079	-17.2975	1334	5.04051e-18	1
ENSSSCG00000034896	0.048414	-21.3509	-17.2406	381	5.74709e-18	1
HERPUD1	0.0251086	-21.3352	-17.2249	887	5.95846e-18	1
SON	0.0303266	-21.2961	-17.1858	1334	6.51987e-18	1
CHCHD5	0.0440635	-21.2863	-17.176	418	6.66859e-18	1
CCND2	0.0284844	-21.1766	-17.0662	602	8.58622e-18	1
CCT3	0.0255342	-21.1379	-17.0275	1027	9.38607e-18	1
LAMTOR2	0.0265758	-21.1311	-17.0207	742	9.53427e-18	1
MRPS15	0.0296842	-21.1194	-17.009	565	9.79417e-18	1
STXBP3	0.0275511	-21.1117	-17.0014	656	9.96791e-18	1
CD247	0.0302355	-21.0752	-16.9649	1334	1.0842e-17	1
ENSSSCG00000033212	0.026298	-21.035	-16.9247	1079	1.18945e-17	1
GPSM3	0.0253582	-20.8913	-16.7809	1019	1.65599e-17	1
ARRDC3	0.0616433	-20.8299	-16.7196	280	1.90724e-17	1
ENSSSCG00000003691	0.0301143	-20.7821	-16.6718	1334	2.12936e-17	1
SPINK4	0.29731	-20.7809	-16.6706	70	2.13504e-17	1
HNRNPDL	0.0301116	-20.7756	-16.6652	1334	2.16149e-17	1
ENSSSCG00000011764	0.0255882	-20.7216	-16.6113	806	2.44751e-17	1
TENT5C	0.0391801	-20.7144	-16.6041	452	2.48847e-17	1
ENSSSCG00000002259	0.0268222	-20.6968	-16.5865	706	2.5914e-17	1
HIST1H2AB	0.0250768	-20.522	-16.4116	848	3.87571e-17	1
S100A4	0.0527895	-20.515	-16.4046	324	3.93881e-17	1
SEC11A	0.0254802	-20.4961	-16.3858	1040	4.11356e-17	1
IRF8	0.0515049	-20.4946	-16.3842	335	4.12825e-17	1
ENSSSCG00000010320	0.0250383	-20.448	-16.3377	1002	4.59567e-17	1
CD38	0.0275831	-20.446	-16.3356	628	4.61742e-17	1
DNMT1	0.0274691	-20.3713	-16.2609	633	5.48373e-17	1
ENSSSCG00000039582	0.0302568	-20.3646	-16.2543	1275	5.56849e-17	1
DDC	0.245993	-20.3623	-16.252	91	5.59769e-17	1
FBXO39	0.0490027	-20.3502	-16.2398	359	5.75673e-17	1
ENSSSCG00000038960	0.0560075	-20.285	-16.1747	300	6.68857e-17	1
MPP1	0.0272611	-20.2029	-16.0926	642	8.08019e-17	1
ENSSSCG00000009145	0.0276075	-20.1356	-16.0253	617	9.43433e-17	1
ENSSSCG00000036892	0.0472061	-20.0985	-15.9882	375	1.02761e-16	1
RPL10A	0.0246917	-20.0741	-15.9637	879	1.08713e-16	1
TYMS	0.0262789	-20.0544	-15.944	727	1.13763e-16	1
DNAJC9	0.0599803	-20.0214	-15.911	280	1.22737e-16	1
RBM22	0.0347068	-19.9026	-15.7923	485	1.61328e-16	1
PSMC3	0.0252358	-19.8507	-15.7403	806	1.81824e-16	1
SRPK1	0.0245149	-19.8406	-15.7302	903	1.86107e-16	1
ZC3HAV1	0.0278529	-19.838	-15.7276	598	1.8724e-16	1
TMEM123	0.0253632	-19.7557	-15.6453	1050	2.26305e-16	1
GABARAPL1	0.0643724	-19.7235	-15.6131	264	2.43727e-16	1
TAGAP	0.0419092	-19.7054	-15.595	420	2.54073e-16	1
MAX	0.0281946	-19.6938	-15.5835	1180	2.60925e-16	1
AOAH	0.0933745	-19.6689	-15.5586	216	2.76315e-16	1
LAMTOR5	0.0257483	-19.6004	-15.4901	1077	3.23546e-16	1
UQCR10	0.0251287	-19.5983	-15.488	1037	3.25102e-16	1
NPL	0.029032	-19.5269	-15.4166	558	3.83195e-16	1
UQCRC2	0.0295647	-19.5211	-15.4107	547	3.88381e-16	1
UGCG	0.0369378	-19.52	-15.4097	461	3.89328e-16	1
PTPN1	0.0252725	-19.4973	-15.3869	790	4.10279e-16	1
JARID2	0.0298055	-19.4798	-15.3695	1269	4.27081e-16	1
ZNF75D	0.0543581	-19.4798	-15.3694	301	4.27171e-16	1
RSBN1	0.0341186	-19.4472	-15.3368	487	4.6046e-16	1
ENSSSCG00000039731	0.0310559	-19.4068	-15.2965	522	5.05289e-16	1
ENSSSCG00000001075	0.0284145	-19.3945	-15.2841	1194	5.19833e-16	1
ATP5MC1	0.0298448	-19.3806	-15.2703	1306	5.36676e-16	1
GDI2	0.0244409	-19.3365	-15.2262	875	5.94029e-16	1
NOP56	0.0244	-19.2409	-15.1305	876	7.40401e-16	1
EIF2S1	0.0373282	-19.2344	-15.124	455	7.51618e-16	1
CDK4	0.0314241	-19.0765	-14.9661	514	1.08115e-15	1
NFIL3	0.0423616	-19.0608	-14.9504	409	1.12097e-15	1
JMJD1C	0.0261224	-19.04	-14.9297	698	1.1758e-15	1
ENSSSCG00000014031	0.0251814	-18.9268	-14.8165	777	1.52598e-15	1
NDEL1	0.0283865	-18.8848	-14.7745	564	1.68076e-15	1
ENSSSCG00000029577	0.0533742	-18.8426	-14.7322	300	1.85256e-15	1
TRA2A	0.0321435	-18.8335	-14.7232	503	1.89158e-15	1
IMP4	0.0282747	-18.7653	-14.655	565	2.21324e-15	1
PLP2	0.030044	-18.65	-14.5396	529	2.88669e-15	1
FKBP4	0.0271811	-18.5792	-14.4689	597	3.39741e-15	1
ENSSSCG00000008183	0.0431803	-18.5625	-14.4521	395	3.53085e-15	1
RPS19BP1	0.0327103	-18.55	-14.4397	494	3.63366e-15	1
RPS14	0.0291752	-18.5454	-14.435	1334	3.67253e-15	1
ENSSSCG00000002449	0.0263129	-18.4809	-14.3705	648	4.26045e-15	1
COX17	0.0291384	-18.4591	-14.3487	1334	4.47998e-15	1
FOXP3	0.229157	-18.4586	-14.3482	83	4.48521e-15	1
ENSSSCG00000033987	0.0290525	-18.3985	-14.2882	543	5.15009e-15	1
NOB1	0.0590345	-18.3601	-14.2497	271	5.62725e-15	1
ENSSSCG00000016262	0.0277049	-18.357	-14.2467	574	5.66692e-15	1
ENSSSCG00000000377	0.0285315	-18.355	-14.2447	553	5.69272e-15	1
TP53I11	0.0711333	-18.3278	-14.2174	241	6.06121e-15	1
PHTF1	0.046197	-18.3114	-14.2011	356	6.29429e-15	1
TMEM60	0.0569851	-18.3029	-14.1926	278	6.41822e-15	1
PSMB9	0.0240752	-18.2443	-14.1339	867	7.34657e-15	1
POLR2D	0.0290166	-18.1803	-14.07	541	8.51184e-15	1
ENSSSCG00000006363	0.0259582	-18.1725	-14.0621	669	8.66713e-15	1
SLA	0.0290109	-18.1605	-14.0501	1334	8.90974e-15	1
TNFAIP8	0.0292856	-18.1491	-14.0387	1307	9.1467e-15	1
B3GNT2	0.0323568	-18.1177	-14.0074	494	9.8319e-15	1
RHOC	0.0398831	-18.1064	-13.996	421	1.00915e-14	1
MRPS12	0.044926	-18.1021	-13.9917	368	1.01921e-14	1
RPN1	0.0291708	-18.0793	-13.9689	537	1.07413e-14	1
HERC6	0.0266667	-18.0705	-13.9601	608	1.0962e-14	1
GTF2H5	0.0265188	-18.031	-13.9206	615	1.2006e-14	1
MKKS	0.0648633	-17.959	-13.8486	252	1.41698e-14	1
SNX10	0.0320064	-17.9024	-13.7921	496	1.61406e-14	1
ZBTB41	0.0506859	-17.8725	-13.7621	306	1.72941e-14	1
JOSD1	0.0445576	-17.848	-13.7377	368	1.82951e-14	1
ENSSSCG00000027826	0.0408333	-17.8467	-13.7363	409	1.83528e-14	1
IRF2	0.0300678	-17.8236	-13.7132	520	1.93541e-14	1
CNPY2	0.0252013	-17.6778	-13.5675	725	2.70729e-14	1
ENSSSCG00000007743	0.0288	-17.6696	-13.5592	1334	2.75909e-14	1
NDUFA9	0.044578	-17.6467	-13.5363	364	2.90871e-14	1
SELENOS	0.0318839	-17.6457	-13.5353	495	2.91531e-14	1
KDSR	0.0305017	-17.6284	-13.5181	512	3.03338e-14	1
PPID	0.0441069	-17.591	-13.4807	369	3.30611e-14	1
PTPN6	0.0504993	-17.5132	-13.4029	303	3.95484e-14	1
CTSH	0.0480946	-17.4094	-13.2991	320	5.02284e-14	1
FUNDC2	0.0248351	-17.3634	-13.2531	746	5.58382e-14	1
HCST	0.0236493	-17.3386	-13.2282	885	5.91278e-14	1
TAB2	0.0444841	-17.3214	-13.211	359	6.15165e-14	1
NDUFB11	0.0236429	-17.2929	-13.1826	882	6.56777e-14	1
TFRC	0.110104	-17.2794	-13.1691	188	6.7756e-14	1
ETF1	0.0376387	-17.2731	-13.1627	433	6.87526e-14	1
SAMSN1	0.0255137	-17.2232	-13.1129	665	7.71135e-14	1
ENSSSCG00000025499	0.0263895	-17.1562	-13.0459	1150	8.99762e-14	1
RAB11A	0.0263032	-17.1237	-13.0134	600	9.69645e-14	1
CSRP1	0.0529452	-17.0934	-12.983	285	1.03987e-13	1
ENSSSCG00000033909	0.0285326	-17.0521	-12.9417	1334	1.14363e-13	1
GADD45B	0.065536	-17.0209	-12.9105	245	1.22873e-13	1
DUSP4	0.033708	-17.0086	-12.8982	469	1.26413e-13	1
MRPS25	0.0345399	-16.9599	-12.8496	460	1.41398e-13	1
NCK1	0.0325389	-16.9565	-12.8461	481	1.42515e-13	1
FMC1	0.0964171	-16.9453	-12.8349	200	1.46247e-13	1
PSMD14	0.039785	-16.9344	-12.824	408	1.4996e-13	1
NDUFA8	0.0342129	-16.9274	-12.817	463	1.52389e-13	1
MRPS23	0.0523606	-16.8983	-12.7879	286	1.62951e-13	1
UBC	0.0284573	-16.8793	-12.769	1334	1.70234e-13	1
ENSSSCG00000034314	0.0235841	-16.8348	-12.7245	858	1.88599e-13	1
NAMPT	0.0654854	-16.8286	-12.7182	244	1.91335e-13	1
GGNBP2	0.0434067	-16.7951	-12.6847	363	2.06658e-13	1
RP2	0.0747294	-16.7899	-12.6795	227	2.09153e-13	1
NFKBIZ	0.0234141	-16.7684	-12.658	942	2.19765e-13	1
OAS2	0.0721603	-16.7548	-12.6444	231	2.26773e-13	1
MGST3	0.0248191	-16.7444	-12.6341	719	2.32238e-13	1
ENSSSCG00000034527	0.0238846	-16.7362	-12.6258	813	2.36698e-13	1
ENSSSCG00000024776	0.0283791	-16.7002	-12.5898	1334	2.5715e-13	1
ENSSSCG00000022925	0.030451	-16.671	-12.5606	503	2.75027e-13	1
CCT8	0.0297115	-16.6703	-12.56	513	2.75443e-13	1
TIMM9	0.0437092	-16.6482	-12.5378	356	2.89844e-13	1
ENSSSCG00000027196	0.0234965	-16.6406	-12.5302	860	2.94953e-13	1
CAPRIN1	0.0277735	-16.5922	-12.4819	545	3.29723e-13	1
IPO5	0.0652531	-16.5694	-12.459	243	3.47498e-13	1
RCC2	0.0366421	-16.5674	-12.457	435	3.49127e-13	1
ENSSSCG00000012654	0.0433385	-16.548	-12.4376	359	3.65079e-13	1
NDUFA1	0.0236988	-16.5464	-12.436	1005	3.66404e-13	1
POLR2E	0.0232956	-16.524	-12.4137	907	3.85752e-13	1
ENSSSCG00000020710	0.0460565	-16.4914	-12.381	325	4.15873e-13	1
ENSSSCG00000038359	0.0246052	-16.456	-12.3456	727	4.51195e-13	1
MRPS14	0.0768091	-16.436	-12.3256	222	4.72444e-13	1
BUD31	0.023488	-16.4339	-12.3236	848	4.74709e-13	1
SIT1	0.0241643	-16.4174	-12.3071	1050	4.93106e-13	1
ENSSSCG00000039612	0.0430882	-16.3787	-12.2684	359	5.39048e-13	1
PSME1	0.0234598	-16.3634	-12.2531	848	5.58357e-13	1
ENSSSCG00000031897	0.0254987	-16.3421	-12.2318	622	5.86414e-13	1
PHB	0.0253183	-16.3255	-12.2151	636	6.09401e-13	1
RAN	0.0281909	-16.2714	-12.1611	1334	6.90127e-13	1
PDK1	0.0425225	-16.2404	-12.1301	364	7.41222e-13	1
AGR2	0.192492	-16.1874	-12.0771	100	8.37384e-13	1
PNRC2	0.0272487	-16.1215	-12.0112	1207	9.74561e-13	1
SLC11A2	0.0306366	-16.1214	-12.0111	495	9.74848e-13	1
ENSSSCG00000014075	0.0247189	-16.0533	-11.943	1093	1.14032e-12	1
BRK1	0.0253134	-16.0322	-11.9219	1123	1.19703e-12	1
TOMM7	0.0231052	-16.0215	-11.9111	910	1.22715e-12	1
FAM192A	0.03403	-15.961	-11.8506	455	1.41059e-12	1
ZFAND5	0.0239044	-15.9553	-11.8449	775	1.42917e-12	1
ENSSSCG00000012811	0.0258962	-15.941	-11.8307	588	1.47677e-12	1
GZMB	0.0243039	-15.9211	-11.8108	732	1.54609e-12	1
PSMA4	0.0233741	-15.8775	-11.7671	832	1.70944e-12	1
MAP3K1	0.0524171	-15.8293	-11.719	276	1.9099e-12	1
ENSSSCG00000001455	0.0398543	-15.804	-11.6937	391	2.02464e-12	1
ENSSSCG00000034853	0.105823	-15.7547	-11.6444	184	2.26784e-12	1
STAT4	0.0381013	-15.7448	-11.6344	410	2.32037e-12	1
GTF2F2	0.031875	-15.716	-11.6056	476	2.47961e-12	1
GNL3	0.0870805	-15.6324	-11.522	204	3.00599e-12	1
GNAI3	0.0262618	-15.6258	-11.5154	568	3.05192e-12	1
PIM2	0.0486587	-15.6194	-11.509	293	3.09727e-12	1
DUSP2	0.0432665	-15.6136	-11.5033	341	3.13842e-12	1
MRPL20	0.0244017	-15.6125	-11.5021	704	3.14704e-12	1
TMEM263	0.0255246	-15.6019	-11.4916	596	3.22427e-12	1
ARHGDIB	0.0278883	-15.5883	-11.478	1334	3.32675e-12	1
HMCES	0.0247709	-15.5762	-11.4658	652	3.42114e-12	1
ECHS1	0.0236284	-15.5533	-11.443	1033	3.60608e-12	1
NT5DC2	0.155533	-15.5215	-11.4111	137	3.88021e-12	1
JAML	0.0688901	-15.517	-11.4066	230	3.92074e-12	1
ENSSSCG00000012166	0.0254759	-15.4453	-11.3349	594	4.62435e-12	1
FAM102A	0.0347763	-15.4045	-11.2942	441	5.07973e-12	1
CBLB	0.0242815	-15.4022	-11.2918	706	5.10734e-12	1
HERC5	0.0719976	-15.395	-11.2846	224	5.19259e-12	1
ENSSSCG00000033037	0.0519798	-15.388	-11.2777	274	5.2765e-12	1
CARHSP1	0.0241428	-15.3774	-11.267	721	5.4073e-12	1
ENSSSCG00000023603	0.0307773	-15.3337	-11.2233	485	5.97964e-12	1
NDUFB10	0.0232742	-15.3305	-11.2201	1007	6.02381e-12	1
BCL2L1	0.163707	-15.3169	-11.2065	127	6.21561e-12	1
ENSSSCG00000002036	0.038262	-15.3069	-11.1965	402	6.36032e-12	1
AP1M1	0.0645973	-15.3024	-11.1921	237	6.42559e-12	1
ND6	0.0340629	-15.2634	-11.153	447	7.03044e-12	1
YWHAH	0.0251336	-15.2405	-11.1301	606	7.41098e-12	1
PPP4R3B	0.0256255	-15.2301	-11.1198	582	7.58991e-12	1
NOLC1	0.0264554	-15.2105	-11.1001	555	7.94082e-12	1
RALY	0.0228019	-15.1921	-11.0818	927	8.28337e-12	1
CHURC1	0.0384245	-15.1688	-11.0584	398	8.74111e-12	1
EIF3E	0.0278999	-15.1584	-11.0481	1307	8.95167e-12	1
ENSSSCG00000011676	0.02305	-15.1258	-11.0154	989	9.65155e-12	1
LFNG	0.057066	-15.1008	-10.9904	254	1.02234e-11	1
RPS13	0.0276683	-15.0969	-10.9866	1334	1.03135e-11	1
NDUFB8	0.0232291	-15.0552	-10.9448	1013	1.13554e-11	1
MYO1F	0.108757	-15.0531	-10.9427	177	1.14095e-11	1
EIF3D	0.0250897	-15.0125	-10.9021	1132	1.25277e-11	1
NUDT21	0.0232612	-15.0096	-10.8992	800	1.26117e-11	1
MRPL27	0.0466167	-15.0042	-10.8938	299	1.27699e-11	1
SUSD3	0.0233309	-14.9346	-10.8242	788	1.49889e-11	1
RHOH	0.0238841	-14.9332	-10.8228	726	1.50368e-11	1
TNIP3	0.178489	-14.926	-10.8157	100	1.52866e-11	1
ENSSSCG00000004415	0.0410604	-14.869	-10.7587	356	1.74304e-11	1
TWISTNB	0.0245411	-14.856	-10.7456	635	1.79624e-11	1
ENSSSCG00000030295	0.022774	-14.8501	-10.7397	960	1.82086e-11	1
RBX1	0.0226551	-14.8354	-10.7251	912	1.8833e-11	1
RPS10-NUDT3	0.0275365	-14.8045	-10.6942	1334	2.02218e-11	1
UTP11	0.0434644	-14.7815	-10.6711	323	2.13255e-11	1
TGFB1	0.0375816	-14.7801	-10.6697	402	2.13923e-11	1
VPS37B	0.11104	-14.7725	-10.6622	173	2.1769e-11	1
ATG12	0.0436197	-14.7607	-10.6504	321	2.23681e-11	1
SKIL	0.0249936	-14.7452	-10.6349	598	2.31803e-11	1
RABEP1	0.0346634	-14.7154	-10.605	434	2.48307e-11	1
TEX30	0.125552	-14.6329	-10.5226	158	3.00203e-11	1
ENSSSCG00000039249	0.0240213	-14.6192	-10.5089	688	3.09831e-11	1
ENSSSCG00000014909	0.137771	-14.5859	-10.4755	146	3.34575e-11	1
ENSSSCG00000005481	0.0780288	-14.5286	-10.4183	210	3.81724e-11	1
ENSSSCG00000029066	0.0381738	-14.4969	-10.3866	390	4.10626e-11	1
SLIRP	0.0245933	-14.4481	-10.3377	612	4.59479e-11	1
OSTF1	0.0272712	-14.4348	-10.3244	1256	4.73781e-11	1
MRPL55	0.0237855	-14.4209	-10.3105	707	4.89212e-11	1
KLF2	0.129119	-14.4157	-10.3054	153	4.95005e-11	1
NDUFB6	0.0259371	-14.4045	-10.2942	555	5.07956e-11	1
TRA2B	0.0273482	-14.3895	-10.2792	1334	5.258e-11	1
COX7A2	0.027344	-14.3803	-10.27	1334	5.37061e-11	1
HDAC2	0.0264267	-14.3609	-10.2506	542	5.61605e-11	1
CLK1	0.0239463	-14.3107	-10.2004	675	6.30434e-11	1
CD47	0.0228171	-14.3103	-10.1999	998	6.31076e-11	1
GOLPH3L	0.0744817	-14.3061	-10.1958	214	6.37153e-11	1
ABI1	0.0289838	-14.2941	-10.1838	497	6.55012e-11	1
SPOP	0.0439344	-14.2666	-10.1562	310	6.97915e-11	1
TP53	0.0256083	-14.2661	-10.1557	562	6.9869e-11	1
S100A11	0.0352563	-14.2268	-10.1164	421	7.64822e-11	1
GCHFR	0.0245108	-14.2242	-10.1139	609	7.69343e-11	1
NIPSNAP3B	0.0409558	-14.2112	-10.1008	343	7.92809e-11	1
GABARAPL2	0.0246985	-14.1806	-10.0702	1130	8.50692e-11	1
PTPN12	0.0304391	-14.1407	-10.0304	476	9.32428e-11	1
LASP1	0.026771	-14.1136	-10.0032	531	9.92622e-11	1
SPC24	0.271812	-90.6436	-86.5332	282	2.92956e-87	2
PCLAF	0.213968	-90.5367	-86.4264	327	3.74642e-87	2
BIRC5	0.24404	-84.7894	-80.679	284	2.09392e-81	2
KIF22	2.39567	-83.9477	-79.8373	72	1.45437e-80	2
CCNB2	2.00201	-82.0483	-77.9379	84	1.15372e-78	2
TK1	0.791176	-80.9602	-76.8499	188	1.41292e-77	2
KIF11	1.67294	-74.1438	-70.0334	80	9.25932e-71	2
ENSSSCG00000039107	1.98653	-74.0961	-69.9857	69	1.0334e-70	2
KIF4A	2.22749	-74.0269	-69.9166	65	1.21174e-70	2
TPX2	0.730958	-72.1636	-68.0533	180	8.84543e-69	2
CDC20	1.42886	-69.5571	-65.4467	91	3.57499e-66	2
AURKB	1.55746	-68.2581	-64.1477	73	7.11654e-65	2
NDC80	1.33112	-66.4026	-62.2923	83	5.10178e-63	2
SGO1	1.30937	-66.2856	-62.1752	87	6.67988e-63	2
MTFR2	1.18097	-62.7251	-58.6148	104	2.42781e-59	2
CDCA3	1.25736	-62.6917	-58.5814	77	2.62192e-59	2
LMNB1	0.216313	-61.0538	-56.9434	248	1.13915e-57	2
CKAP2	1.42791	-60.5829	-56.4725	67	3.36884e-57	2
SGO2	1.21914	-60.2467	-56.1363	74	7.30562e-57	2
DLGAP5	1.05263	-59.3888	-55.2785	111	5.26678e-56	2
ASF1B	1.05344	-58.8924	-54.782	104	1.65178e-55	2
ENSSSCG00000026302	1.00325	-58.3051	-54.1948	115	6.38619e-55	2
KIF2C	1.3252	-58.1171	-54.0068	67	9.84488e-55	2
CENPA	1.01127	-57.5285	-53.4181	92	3.81821e-54	2
HMMR	0.906466	-55.4821	-51.3717	118	4.2489e-52	2
KIF15	0.932632	-54.4024	-50.292	84	5.10506e-51	2
KIFC1	0.72511	-52.9591	-48.8488	138	1.4166e-49	2
CENPF	0.304156	-52.7624	-48.652	206	2.22836e-49	2
ENSSSCG00000034913	0.863292	-52.4137	-48.3033	92	4.97386e-49	2
FBXO5	1.33701	-52.2479	-48.1375	61	7.28539e-49	2
UBE2C	0.321414	-52.2067	-48.0964	201	8.00988e-49	2
HIST1H2AG	0.303039	-51.0544	-46.9441	203	1.13741e-47	2
UHRF1	0.793981	-51.0493	-46.9389	116	1.151e-47	2
CENPN	0.837488	-50.8229	-46.7125	83	1.9385e-47	2
TOP2A	0.298495	-50.4955	-46.3851	203	4.11992e-47	2
SMC2	0.118868	-50.4515	-46.3412	302	4.55868e-47	2
ZNF367	0.888697	-49.9894	-45.879	74	1.32121e-46	2
CDCA8	0.775376	-49.0378	-44.9274	90	1.18191e-45	2
NCAPH	1.00479	-47.7867	-43.6764	65	2.10685e-44	2
ENSSSCG00000004782	2.13646	-47.7572	-43.6468	49	2.25512e-44	2
CBX5	0.106649	-45.6715	-41.5612	304	2.74692e-42	2
MAD2L1	0.0983219	-44.8367	-40.7263	322	1.87796e-41	2
ENSSSCG00000000002	2.02107	-44.6591	-40.5487	48	2.82672e-41	2
KIF20A	1.44971	-44.0988	-39.9885	53	1.0269e-40	2
ENSSSCG00000010214	0.291235	-43.5405	-39.4302	190	3.71381e-40	2
ASPM	0.891463	-43.5148	-39.4044	64	3.94061e-40	2
RAD51AP1	1.06368	-43.4926	-39.3823	59	4.14686e-40	2
CKS1B	0.0710032	-43.1604	-39.05	423	8.9117e-40	2
PIMREG	1.71593	-42.3158	-38.2055	49	6.23047e-39	2
SHCBP1	0.60524	-41.5135	-37.4032	86	3.95223e-38	2
LYAR	0.169694	-41.0463	-36.9359	227	1.15896e-37	2
PBK	0.71383	-40.9345	-36.8241	69	1.49933e-37	2
TCF19	0.590576	-40.4756	-36.3652	83	4.31295e-37	2
NCAPG	0.573157	-40.3507	-36.2404	96	5.74966e-37	2
MXD3	0.533122	-40.0111	-35.9008	119	1.25671e-36	2
CENPU	0.472809	-39.2092	-35.0989	133	7.96388e-36	2
MIS18A	0.795394	-37.8651	-33.7547	61	1.75915e-34	2
MYBL2	0.523963	-37.8307	-33.7204	91	1.90373e-34	2
TMPO	0.147301	-37.5828	-33.4725	231	3.36911e-34	2
BBS7	0.396959	-37.5158	-33.4054	146	3.93186e-34	2
ENSSSCG00000035908	0.548627	-36.8921	-32.7817	76	1.65309e-33	2
SKA2	0.121853	-36.1232	-32.0129	246	9.70829e-33	2
ENSSSCG00000004969	0.472396	-35.5562	-31.4458	106	3.58238e-32	2
CDKN2C	0.0814358	-35.3737	-31.2633	314	5.4532e-32	2
ORC1	0.474566	-35.3357	-31.2254	96	5.95127e-32	2
KPNA2	0.0953783	-34.8873	-30.777	275	1.67127e-31	2
BUB1	1.03605	-34.6988	-30.5884	52	2.57982e-31	2
E2F8	2.32088	-34.2109	-30.1005	40	7.93359e-31	2
ENSSSCG00000007493	0.420317	-33.3951	-29.2847	115	5.19163e-30	2
CCNB1	0.424319	-33.1595	-29.0491	110	8.93098e-30	2
TUBB4B	0.0433348	-32.8824	-28.7721	501	1.69019e-29	2
MELK	1.69604	-32.847	-28.7366	43	1.83398e-29	2
PARPBP	1.19964	-32.8435	-28.7332	48	1.84855e-29	2
NEK2	1.12413	-32.7649	-28.6546	49	2.21516e-29	2
CENPE	0.0966863	-32.5715	-28.4611	263	3.45834e-29	2
CDCA5	1.77914	-32.2784	-28.1681	42	6.79062e-29	2
ENSSSCG00000017032	0.362778	-31.5533	-27.443	128	3.60609e-28	2
MCM4	0.188496	-31.1562	-27.0458	192	8.99821e-28	2
ENSSSCG00000035209	0.0341053	-31.0208	-26.9104	592	1.22908e-27	2
ENSSSCG00000032946	0.957623	-30.6325	-26.5221	50	3.00526e-27	2
DDX39A	0.0602382	-30.2081	-26.0978	388	7.98371e-27	2
ENSSSCG00000031117	0.0571947	-30.0222	-25.9118	405	1.22513e-26	2
MCM3	0.362257	-29.9448	-25.8345	116	1.46392e-26	2
NCAPD2	0.509567	-29.3846	-25.2742	64	5.31833e-26	2
NUF2	0.290863	-28.8222	-24.7118	142	1.9417e-25	2
ENSSSCG00000031741	0.0952844	-28.7919	-24.6815	250	2.08193e-25	2
ESCO2	0.871382	-28.7173	-24.607	50	2.47193e-25	2
CLSPN	0.251454	-27.2879	-23.1776	151	6.64366e-24	2
CIP2A	0.356987	-26.8477	-22.7373	78	1.831e-23	2
POC1A	0.251215	-26.6466	-22.5363	148	2.9089e-23	2
CENPW	0.0614989	-26.2493	-22.139	331	7.26179e-23	2
MCM5	0.309359	-25.7342	-21.6239	108	2.37763e-22	2
RPA2	0.0664067	-25.7061	-21.5957	299	2.53663e-22	2
RACGAP1	0.307984	-25.3596	-21.2492	103	5.63373e-22	2
ENSSSCG00000032060	0.0433005	-25.1513	-21.0409	455	9.10098e-22	2
MCM10	0.682372	-25.0057	-20.8953	51	1.27256e-21	2
USP1	0.0355169	-24.5332	-20.4228	513	3.77727e-21	2
CDC45	0.306079	-24.4655	-20.3551	85	4.41447e-21	2
MCM6	0.0929699	-24.18	-20.0697	235	8.51808e-21	2
MCM7	0.0567251	-24.1425	-20.0321	341	9.287e-21	2
CIT	1.63549	-23.8769	-19.7665	37	1.71179e-20	2
NRM	0.385896	-23.4144	-19.304	64	4.96538e-20	2
CEP55	0.43016	-23.2577	-19.1474	60	7.12225e-20	2
MCM2	0.281018	-23.2522	-19.1418	98	7.21391e-20	2
HIST2H2AC	0.119451	-22.4585	-18.3481	203	4.48631e-19	2
CENPS	0.273689	-22.3416	-18.2312	88	5.87202e-19	2
CDK2	0.271778	-21.9763	-17.866	85	1.36156e-18	2
KIF20B	0.145799	-21.7375	-17.6272	181	2.35966e-18	2
SASS6	0.330645	-21.3087	-17.1984	66	6.33348e-18	2
HIST1H1D	0.0904919	-21.2289	-17.1185	226	7.61198e-18	2
CDT1	0.206935	-21.1408	-17.0304	140	9.32368e-18	2
METTL26	0.27471	-21.0748	-16.9645	77	1.08528e-17	2
TRIP13	0.407817	-20.9654	-16.855	58	1.39629e-17	2
UBE2T	0.119087	-20.9124	-16.8021	197	1.57727e-17	2
CENPM	0.11773	-20.1873	-16.077	195	8.37547e-17	2
PSMC3IP	0.869888	-20.116	-16.0057	42	9.87045e-17	2
ATAD2	0.0879306	-20.0368	-15.9264	224	1.18466e-16	2
RFC4	0.0995133	-19.5665	-15.4562	209	3.4982e-16	2
ENSSSCG00000016679	0.0869269	-18.6452	-14.5348	219	2.91865e-15	2
EZH2	0.0801116	-18.6316	-14.5212	228	3.01161e-15	2
E2F2	0.44191	-18.2459	-14.1356	52	7.31882e-15	2
TONSL	0.290214	-18.0187	-13.9084	64	1.23488e-14	2
ENSSSCG00000035544	0.0460172	-17.9774	-13.8671	352	1.35814e-14	2
RNASEH2B	0.109145	-17.9026	-13.7922	192	1.61363e-14	2
LIG1	0.340396	-17.7862	-13.6758	58	2.10957e-14	2
TROAP	3.66966	-17.7811	-13.6707	24	2.13437e-14	2
PHF19	0.391592	-17.6634	-13.553	54	2.7989e-14	2
CCDC34	0.190177	-17.5881	-13.4778	124	3.32851e-14	2
RAD51	1.04039	-17.5568	-13.4464	37	3.57747e-14	2
HSPA4L	0.484464	-17.4674	-13.357	49	4.39518e-14	2
CENPT	1.20965	-17.4405	-13.3302	35	4.67565e-14	2
MTHFD2	0.230902	-16.9317	-12.8214	73	1.50873e-13	2
HELLS	0.116314	-16.8377	-12.7273	180	1.87371e-13	2
GPR19	1.12924	-16.5992	-12.4889	35	3.2442e-13	2
NCAPD3	0.200579	-16.4451	-12.3347	88	4.62669e-13	2
ENSSSCG00000004518	0.929995	-16.1451	-12.0347	37	9.23114e-13	2
SKA3	0.263604	-15.9553	-11.8449	63	1.42914e-12	2
GINS2	0.118022	-15.7047	-11.5943	172	2.54493e-12	2
HIST1H1E	0.0477133	-15.3652	-11.2549	296	5.56085e-12	2
FANCD2	0.419461	-15.3425	-11.2321	49	5.85975e-12	2
ENSSSCG00000008677	0.0385437	-15.1323	-11.022	396	9.50654e-12	2
CKAP2L	1.27742	-15.119	-11.0086	32	9.80343e-12	2
ENSSSCG00000039370	2.03319	-15.0862	-10.9759	27	1.05716e-11	2
NCAPG2	0.344798	-15.0681	-10.9578	53	1.10207e-11	2
ENSSSCG00000034871	0.913678	-15.0217	-10.9113	36	1.22656e-11	2
MRPS28	0.208998	-14.7507	-10.6404	71	2.28885e-11	2
XRCC2	0.240798	-14.5009	-10.3906	63	4.0684e-11	2
PTPMT1	0.173366	-14.4195	-10.3091	99	4.90752e-11	2
DEPDC1	2.06816	-14.2734	-10.163	26	6.86998e-11	2
ENSSSCG00000031023	0.241761	-351.583	-347.472	714	0	3
RBM38	0.0891472	-224.338	-220.228	1006	5.91688e-221	3
PDCD1	0.114479	-218.488	-214.378	1209	4.19161e-215	3
GYPC	0.0862734	-216.214	-212.103	1008	7.88208e-213	3
RAE1	0.104367	-196.593	-192.482	1215	3.2926e-193	3
LTB	0.0883788	-171.695	-167.584	1185	2.60389e-168	3
SH2D1A	0.0701955	-166.707	-162.597	1036	2.53052e-163	3
TMSB10	0.0786804	-151.717	-147.606	1334	2.47608e-148	3
DHRS3	0.0884798	-150.905	-146.795	718	1.60458e-147	3
GPR174	0.0602423	-137.177	-133.067	961	8.57932e-134	3
TOX	0.0737901	-120.246	-116.135	702	7.3217e-117	3
HMGN3	0.0540432	-112.022	-107.912	1064	1.22599e-108	3
BATF	0.0709958	-111.752	-107.642	683	2.28285e-108	3
RPA3	0.0623279	-111.065	-106.955	776	1.1095e-107	3
ICA1	0.203529	-107.044	-102.933	402	1.1659e-103	3
TIGIT	0.0844916	-101.092	-96.9819	550	1.04262e-97	3
GAPDH	0.055916	-91.1177	-87.0073	1334	9.83309e-88	3
ENSSSCG00000003236	0.178598	-90.0696	-85.9593	380	1.09832e-86	3
ATF3	0.127458	-86.9951	-82.8847	442	1.30402e-83	3
IL6R	0.0531569	-79.6844	-75.5741	710	2.6663e-76	3
TRIB1	0.0745176	-77.1721	-73.0617	521	8.67489e-74	3
GSPT2	0.107412	-74.1681	-70.0577	442	8.75537e-71	3
ITGB2	0.0422567	-73.1461	-69.0358	878	9.20947e-70	3
CD9	0.21361	-73.0769	-68.9665	275	1.08018e-69	3
ENSSSCG00000015499	0.0503438	-67.6612	-63.5508	649	2.813e-64	3
DARS	0.0523185	-60.4174	-56.3071	571	4.93115e-57	3
CXCR5	0.179468	-58.8842	-54.7739	263	1.68321e-55	3
FKBP5	0.0713823	-58.0767	-53.9663	478	1.08068e-54	3
DAPP1	0.097256	-57.6683	-53.5579	409	2.76757e-54	3
ITM2A	0.201744	-57.2891	-53.1787	247	6.62665e-54	3
ENSSSCG00000006156	0.12057	-56.8169	-52.7065	333	1.9655e-53	3
SERHL2	0.105963	-56.397	-52.2866	378	5.1685e-53	3
CKS2	0.0369127	-54.1555	-50.0451	1077	9.0134e-51	3
NCALD	0.0458941	-53.2722	-49.1619	596	6.88888e-50	3
GLIPR1	0.0429218	-52.2046	-48.0943	643	8.04856e-49	3
ID3	0.0986506	-50.2197	-46.1094	362	7.77403e-47	3
PLIN2	0.0607335	-49.6574	-45.5471	486	2.8373e-46	3
IL6ST	0.0889885	-49.1995	-45.0891	392	8.14496e-46	3
ENSSSCG00000014013	0.0462052	-48.6656	-44.5552	562	2.78459e-45	3
ENSSSCG00000026140	0.0726047	-46.3037	-42.1933	432	6.40732e-43	3
GADD45A	0.054609	-45.7525	-41.6421	497	2.2798e-42	3
ACADM	0.071588	-45.7517	-41.6413	433	2.28393e-42	3
IKZF2	0.0702485	-43.8429	-39.7325	429	1.8513e-40	3
CD8A	0.0461102	-42.8334	-38.723	532	1.89213e-39	3
COMMD3	0.0619176	-40.7558	-36.6454	446	2.26251e-37	3
C1orf21	0.0861425	-40.5113	-36.401	336	3.97201e-37	3
TNF	0.159582	-36.8841	-32.7737	222	1.68372e-33	3
METTL8	0.139745	-36.1173	-32.0069	232	9.84201e-33	3
SQLE	0.0624959	-35.7097	-31.5994	417	2.51562e-32	3
SERPINI1	0.0677745	-35.1565	-31.0461	387	8.99188e-32	3
ZC3H12D	0.0674408	-34.0432	-29.9329	379	1.16714e-30	3
PARP1	0.0391216	-33.7191	-29.6087	540	2.46189e-30	3
SAMD11	0.40282	-33.6405	-29.5302	125	2.94996e-30	3
INPP1	0.112404	-32.035	-27.9246	242	1.18949e-28	3
GPX3	0.303059	-31.5261	-27.4157	150	3.83973e-28	3
IRF3	0.0371452	-29.1012	-24.9909	529	1.02129e-25	3
CD200	0.241071	-28.3426	-24.2322	160	5.85847e-25	3
CTTN	0.343837	-27.4168	-23.3065	91	4.93785e-24	3
ENSSSCG00000034697	0.0327154	-27.1301	-23.0198	575	9.55541e-24	3
F2R	0.0575327	-26.2278	-22.1174	363	7.63047e-23	3
LDLRAD4	0.0872656	-25.7537	-21.6433	249	2.27344e-22	3
POU2AF1	0.101855	-25.7449	-21.6346	231	2.3196e-22	3
MAFF	0.280451	-24.8118	-20.7015	121	1.98847e-21	3
LTA	0.294345	-24.165	-20.0547	96	8.81685e-21	3
TRPS1	0.0555172	-23.8777	-19.7673	348	1.7088e-20	3
KBTBD6	0.194215	-23.615	-19.5046	161	3.12896e-20	3
ARL6IP6	0.0570584	-23.3734	-19.2631	328	5.45683e-20	3
TOX2	0.230177	-22.6833	-18.573	136	2.67303e-19	3
MCUB	0.106073	-21.8141	-17.7037	212	1.97824e-18	3
LY9	0.0658037	-21.4632	-17.3528	271	4.43771e-18	3
ATG7	0.216558	-21.4554	-17.3451	136	4.51791e-18	3
PKIG	0.144207	-21.2693	-17.1589	180	6.93574e-18	3
ZNF207	0.0377619	-21.2246	-17.1142	468	7.68735e-18	3
PHLDA2	0.145927	-21.0839	-16.9735	178	1.06284e-17	3
PHACTR2	0.047168	-20.8999	-16.7895	387	1.62356e-17	3
ASCL2	0.58756	-20.5385	-16.4281	49	3.73162e-17	3
ENSSSCG00000005437	0.214503	-20.2315	-16.1211	128	7.56617e-17	3
ATP6V0A1	0.229851	-19.6846	-15.5743	107	2.66519e-16	3
HES1	0.132951	-19.3234	-15.213	179	6.12288e-16	3
IGFBP2	0.0850697	-19.2248	-15.1145	224	7.68324e-16	3
CHST15	0.278123	-18.8247	-14.7143	68	1.93058e-15	3
CITED2	0.0412708	-18.6241	-14.5138	414	3.06355e-15	3
TJP1	0.219975	-18.4208	-14.3104	96	4.89319e-15	3
GPR160	0.18971	-18.295	-14.1847	131	6.53654e-15	3
PRIM2	0.122169	-18.1955	-14.0851	182	8.22005e-15	3
ATAD1	0.0430103	-18.1472	-14.0369	391	9.18603e-15	3
GCNT4	0.210957	-17.9542	-13.8439	104	1.43259e-14	3
YIPF4	0.048578	-17.6311	-13.5208	319	3.01443e-14	3
ETFA	0.0394918	-17.4297	-13.3193	417	4.79382e-14	3
ENSSSCG00000025644	0.187354	-17.4229	-13.3126	125	4.86887e-14	3
BCAT1	0.175817	-17.0526	-12.9422	132	1.14223e-13	3
MALT1	0.0371333	-17.0078	-12.8974	435	1.26649e-13	3
SC5D	0.0502074	-17.0022	-12.8918	299	1.28279e-13	3
SPATS2L	0.267142	-16.9855	-12.8751	65	1.3332e-13	3
NOCT	0.233665	-16.8963	-12.7859	72	1.6371e-13	3
NR4A1	0.121757	-16.8046	-12.6942	175	2.02192e-13	3
ACYP1	0.039309	-16.5569	-12.4466	408	3.57611e-13	3
CALY	0.232355	-16.5372	-12.4269	71	3.74229e-13	3
MSMO1	0.0418797	-16.4638	-12.3534	377	4.43169e-13	3
AKAP5	0.137369	-16.3515	-12.2411	159	5.7397e-13	3
ENSSSCG00000038406	0.154962	-16.3229	-12.2125	144	6.13029e-13	3
DGKZ	0.0556238	-16.1189	-12.0086	266	9.80462e-13	3
RASL11A	0.171164	-15.4275	-11.3171	120	4.81792e-12	3
ENSSSCG00000038187	0.04907	-14.7942	-10.6838	282	2.07103e-11	3
ENSSSCG00000026354	0.03696	-14.4274	-10.317	404	4.81936e-11	3
THUMPD2	0.171724	-14.4183	-10.3079	103	4.92134e-11	3
MGARP	0.164075	-14.2976	-10.1872	114	6.49799e-11	3
ABLIM1	0.0228743	-14.1065	-9.99614	1013	1.00894e-10
MED21	0.0307907	-14.0858	-9.97544	471	1.05818e-10
RFESD	0.101135	-14.0826	-9.97224	179	1.06601e-10
PPIL1	0.0562912	-14.0729	-9.96256	249	1.09003e-10
MRTO4	0.0490336	-14.0602	-9.9498	275	1.12253e-10
MALSU1	0.0282354	-14.046	-9.9356	505	1.15985e-10
CFLAR	0.0272887	-14.0051	-9.8947	1321	1.27439e-10
APTX	0.233124	-13.998	-9.88769	63	1.29512e-10
TIMM8B	0.0241186	-13.9336	-9.8232	627	1.50246e-10
ADK	0.179436	-13.8807	-9.77033	80	1.69695e-10
TMEM134	0.0344993	-13.8805	-9.77012	425	1.69778e-10
ST3GAL3	0.274494	-13.8724	-9.76204	57	1.72968e-10
PRMT1	0.0228173	-13.8597	-9.74933	792	1.78101e-10
PRDX2	0.0253308	-13.829	-9.71866	562	1.91135e-10
SLC16A3	0.164951	-13.7819	-9.67151	103	2.13053e-10
ITGB8	0.374288	-13.7637	-9.65332	49	2.22167e-10
AIMP1	0.0230564	-13.7497	-9.63936	1042	2.29424e-10
BLM	1.12184	-13.7378	-9.6274	32	2.3583e-10
SPAI-2	0.161386	-13.734	-9.62363	109	2.37888e-10
ENSSSCG00000038711	0.0226759	-13.7162	-9.60585	802	2.47828e-10
ENSSSCG00000034868	0.0232352	-13.7073	-9.59698	1057	2.5294e-10
ENSSSCG00000028695	0.166417	-13.7049	-9.59456	97	2.54355e-10
CHCHD10	0.045894	-13.6958	-9.58548	288	2.59731e-10
ENSSSCG00000014296	0.0419207	-13.6689	-9.55851	320	2.76371e-10
SF3B5	0.0270978	-13.6616	-9.55124	1278	2.81035e-10
EXOC6	0.0621172	-13.6261	-9.5157	232	3.04997e-10
MX2	0.0403951	-13.62	-9.50962	338	3.09297e-10
ACADL	0.189286	-13.6103	-9.49998	73	3.16239e-10
BRCA2	0.50689	-13.6042	-9.49386	43	3.20731e-10
NMI	0.0239434	-13.5994	-9.48905	626	3.24299e-10
NAB1	0.0706003	-13.5866	-9.47626	216	3.33998e-10
MRPL40	0.0323717	-13.5857	-9.47536	446	3.34686e-10
ENSSSCG00000006870	0.0373458	-13.5705	-9.46018	384	3.46593e-10
BSPRY	0.162181	-13.5616	-9.45127	104	3.53774e-10
COMMD1	0.0266823	-13.5612	-9.45081	525	3.54155e-10
ENSSSCG00000035728	0.0223422	-13.5531	-9.44278	842	3.60763e-10
RRAGC	0.0233508	-13.5313	-9.42091	705	3.79393e-10
ENSSSCG00000022176	0.0237378	-13.5098	-9.39946	643	3.98598e-10
SLC38A9	0.203017	-13.4966	-9.38622	68	4.10941e-10
SIVA1	0.0236039	-13.4959	-9.3855	661	4.1162e-10
ENSSSCG00000031730	0.0476732	-13.4916	-9.38124	276	4.15678e-10
NDUFS7	0.0228529	-13.4821	-9.37175	766	4.24869e-10
SRSF6	0.0257149	-13.4548	-9.34446	1193	4.52419e-10
RFC3	0.0606753	-13.451	-9.34067	234	4.56388e-10
MRPL21	0.0423167	-13.4402	-9.32984	312	4.67902e-10
ENSSSCG00000032768	0.109203	-13.4336	-9.32324	166	4.75076e-10
HSH2D	0.0362857	-13.4242	-9.31387	396	4.85429e-10
SSR4	0.0269001	-13.4161	-9.3057	1334	4.94656e-10
ENSSSCG00000000194	0.364389	-13.4053	-9.29498	49	5.07013e-10
ENSSSCG00000004392	0.0244697	-13.3777	-9.2673	584	5.40383e-10
HNRNPD	0.0276383	-13.3755	-9.26511	506	5.43107e-10
HIGD2A	0.0221686	-13.3748	-9.26444	949	5.43956e-10
NDUFB7	0.0220787	-13.3553	-9.24498	907	5.68874e-10
SNRPA1	0.0233956	-13.3374	-9.22706	682	5.92842e-10
ENSSSCG00000030478	0.0281233	-13.3345	-9.22416	498	5.96809e-10
MICOS13	0.0277831	-13.3185	-9.20813	503	6.19251e-10
CCND3	0.0227461	-13.306	-9.1956	769	6.3738e-10
ENSSSCG00000039506	0.558248	-13.3057	-9.19539	41	6.37691e-10
COL28A1	0.418842	-13.2937	-9.18336	46	6.55601e-10
ENSSSCG00000039618	0.0446741	-13.2931	-9.18275	291	6.56521e-10
CKAP5	0.125108	-13.2755	-9.16517	148	6.83641e-10
WDR92	0.174994	-13.2264	-9.11603	78	7.65537e-10
IFT20	0.0386615	-13.2137	-9.10339	355	7.88161e-10
TNFAIP8L3	0.416059	-13.209	-9.09868	46	7.96751e-10
HES6	0.0361471	-13.2088	-9.09849	394	7.97104e-10
FUT8	0.0370134	-13.1854	-9.07501	381	8.4138e-10
STARD3NL	0.113994	-13.1765	-9.06617	159	8.58679e-10
ENSSSCG00000003348	0.0223766	-13.1572	-9.04685	809	8.9774e-10
OCIAD1	0.022382	-13.1424	-9.03205	999	9.2885e-10
DHCR7	0.210412	-13.1367	-9.02637	65	9.41092e-10
FADS3	0.143287	-13.1151	-9.00473	126	9.89175e-10
ENSSSCG00000012997	0.120023	-13.1053	-8.99499	152	1.01159e-09
LGALS3BP	0.0227412	-13.0955	-8.98514	757	1.0348e-09
SDHC	0.0298535	-13.0924	-8.98201	471	1.04229e-09
DDIT3	0.0412297	-13.0831	-8.97275	317	1.06476e-09
CSRNP1	0.0378999	-13.0669	-8.95652	364	1.10529e-09
LAT	0.0267333	-13.0587	-8.9483	1334	1.12643e-09
ENSSSCG00000016096	0.0336109	-13.0572	-8.94682	424	1.13027e-09
MEA1	0.0233289	-13.0496	-8.93928	667	1.15005e-09
CD2	0.0267034	-12.9951	-8.8847	1334	1.30407e-09
PARP14	0.0395313	-12.9763	-8.86591	336	1.36174e-09
SERTAD1	0.0232429	-12.9731	-8.86277	675	1.3716e-09
PHF11	0.038856	-12.9706	-8.86022	346	1.37969e-09
C12orf75	0.170647	-12.9666	-8.85623	79	1.39242e-09
PDAP1	0.0232268	-12.9639	-8.85353	677	1.40112e-09
TOPBP1	0.105006	-12.9317	-8.82136	167	1.50882e-09
ENSSSCG00000033089	0.0471434	-12.931	-8.82064	273	1.51133e-09
PSMC4	0.023197	-12.9284	-8.81806	679	1.52035e-09
MPHOSPH10	0.0459622	-12.9245	-8.81419	279	1.53394e-09
SMC1A	0.0282495	-12.9235	-8.81318	491	1.53752e-09
NT5C	0.0438186	-12.9092	-8.79881	292	1.58923e-09
IL22	0.0496062	-12.9021	-8.79174	262	1.61533e-09
RAC1	0.0224831	-12.8776	-8.76729	777	1.70887e-09
PRDX3	0.0240024	-12.867	-8.75665	592	1.75127e-09
ALDH2	0.185366	-12.8561	-8.74578	71	1.79563e-09
SARAF	0.0221121	-12.8428	-8.73244	978	1.85164e-09
NRP1	0.226499	-12.8051	-8.69478	61	2.0194e-09
PEPD	0.041216	-12.7888	-8.67847	312	2.09665e-09
ENSSSCG00000013721	0.0225638	-12.7832	-8.67286	1032	2.12395e-09
NEDD4L	0.154043	-12.7768	-8.66644	104	2.15554e-09
PLEKHF2	0.0452941	-12.7672	-8.6568	281	2.20394e-09
GFM1	0.142171	-12.7515	-8.64119	123	2.2846e-09
RFC5	0.0839015	-12.7088	-8.59844	191	2.52091e-09
ENSSSCG00000031083	0.0282626	-12.7017	-8.59134	488	2.5625e-09
IL12RB2	0.163143	-12.6952	-8.58488	83	2.60087e-09
RASGEF1B	0.0416238	-12.6623	-8.55199	306	2.80552e-09
ENSSSCG00000006061	0.0262537	-12.6621	-8.55179	1246	2.80676e-09
SNRNP40	0.0348341	-12.6578	-8.54746	402	2.83492e-09
TRAPPC5	0.0218072	-12.6383	-8.5279	922	2.96551e-09
SMIM26	0.0435761	-12.6216	-8.51125	290	3.08141e-09
ARHGDIA	0.0220399	-12.606	-8.49569	981	3.1938e-09
GNB2	0.0233909	-12.6011	-8.49071	1096	3.23067e-09
ENSSSCG00000014850	0.0247499	-12.5868	-8.47642	1166	3.33872e-09
ENSSSCG00000032067	0.0501787	-12.5717	-8.46136	257	3.45652e-09
ENSSSCG00000004572	0.0950035	-12.5663	-8.45593	176	3.50001e-09
ECHDC1	0.0491038	-12.5631	-8.4527	261	3.52616e-09
INPP5D	0.0303346	-12.5615	-8.45113	458	3.53888e-09
SNAPC1	0.0356913	-12.5606	-8.45029	388	3.54577e-09
LRRC1	0.106993	-12.5605	-8.45013	162	3.54705e-09
PSMB3	0.0239499	-12.5569	-8.44653	585	3.5766e-09
TMEM178A	0.341444	-12.5565	-8.44611	49	3.58007e-09
CYCS	0.0264823	-12.5266	-8.41624	1334	3.83497e-09
THUMPD1	0.0400273	-12.5167	-8.4063	320	3.92372e-09
CENPO	0.63255	-12.4972	-8.38686	38	4.10335e-09
NCL	0.0257026	-12.484	-8.37366	1217	4.22998e-09
ENSSSCG00000027675	0.0317399	-12.4801	-8.36977	439	4.26806e-09
ARHGEF39	0.589816	-12.464	-8.3536	39	4.42995e-09
TREH	0.55175	-12.4412	-8.33084	40	4.66835e-09
MRPL58	0.0383947	-12.4202	-8.30981	340	4.89998e-09
POLD1	0.15553	-12.413	-8.30261	90	4.98188e-09
RTF2	0.0233818	-12.394	-8.28361	615	5.20457e-09
CDCA7	0.209232	-12.3866	-8.27621	63	5.29409e-09
AP1S3	0.149995	-12.3805	-8.27012	104	5.36887e-09
ENSSSCG00000010734	0.0231738	-12.3758	-8.26549	635	5.42644e-09
ADD3	0.114382	-12.3579	-8.24755	152	5.65519e-09
EIF2S2	0.0222821	-12.3384	-8.22805	1022	5.915e-09
SLC29A1	0.166597	-12.3314	-8.22107	77	6.01081e-09
ATCAY	0.29503	-12.331	-8.22069	52	6.01604e-09
ENSSSCG00000036350	0.0263846	-12.3212	-8.21086	1334	6.15377e-09
EIF5B	0.022476	-12.3056	-8.19526	741	6.37875e-09
C1orf43	0.0382124	-12.3026	-8.19228	340	6.42267e-09
EBNA1BP2	0.0386065	-12.2992	-8.18884	334	6.47378e-09
POP7	0.0252921	-12.2886	-8.17824	535	6.63376e-09
RPL36AL	0.0263608	-12.2713	-8.16093	1334	6.90351e-09
TIMM17B	0.0225843	-12.2698	-8.1594	723	6.92785e-09
NSD2	0.194334	-12.2672	-8.15687	66	6.96838e-09
AHCY	0.128069	-12.245	-8.13464	135	7.33429e-09
CAB39L	0.0333288	-12.2397	-8.12931	415	7.42484e-09
DDX60	0.0398251	-12.2371	-8.12673	317	7.46919e-09
CFL1	0.0263441	-12.2365	-8.12613	1334	7.47954e-09
CTCF	0.0333202	-12.2326	-8.12229	415	7.54582e-09
ARF3	0.0293197	-12.2237	-8.11333	467	7.70314e-09
DDX17	0.0232146	-12.2191	-8.10874	1095	7.78506e-09
ATAD5	0.0651725	-12.2142	-8.10388	217	7.87258e-09
SNX3	0.0223279	-12.2109	-8.10056	755	7.93306e-09
CD37	0.026327	-12.2006	-8.0902	1334	8.12462e-09
ECT2	0.539932	-12.1984	-8.08809	40	8.16413e-09
P2RY11	0.162211	-12.1943	-8.08399	79	8.2415e-09
RSAD2	0.0624604	-12.1768	-8.06643	222	8.58171e-09
TNFSF8	0.078517	-12.175	-8.06464	195	8.61711e-09
CDK9	0.0380069	-12.1702	-8.05983	340	8.71302e-09
ORC6	0.0604498	-12.153	-8.0426	226	9.06572e-09
ENSSSCG00000039635	0.0335199	-12.1521	-8.04177	411	9.08296e-09
CCNDBP1	0.0346521	-12.1413	-8.03093	395	9.31256e-09
ENSSSCG00000032003	0.0258018	-12.1204	-8.01005	1234	9.77123e-09
ENSSSCG00000032166	0.0245711	-12.1155	-8.00516	1168	9.88189e-09
KNSTRN	0.14986	-12.1122	-8.00186	97	9.95722e-09
ZBTB38	0.0354533	-12.1094	-7.99902	382	1.00227e-08
CAMTA2	0.0229469	-12.1039	-7.99357	645	1.01493e-08
DTYMK	0.0669146	-12.0889	-7.97851	213	1.05072e-08
FANCI	0.150255	-12.0867	-7.97639	95	1.05586e-08
ENSSSCG00000038364	0.021881	-12.0703	-7.95999	810	1.09651e-08
PRELID1	0.0226045	-12.062	-7.95163	703	1.11781e-08
FLT3LG	0.0348081	-12.0572	-7.94682	391	1.13027e-08
ECI2	0.156325	-12.0506	-7.94026	83	1.14748e-08
ITPA	0.0362604	-12.0205	-7.9101	366	1.22999e-08
CRIPT	0.0295398	-11.9989	-7.8885	461	1.29271e-08
C16orf87	0.0514408	-11.9968	-7.88641	248	1.29896e-08
ENSSSCG00000034129	0.033903	-11.9965	-7.88616	403	1.29968e-08
GNLY	0.113359	-11.9918	-7.88146	150	1.31385e-08
ENSSSCG00000010795	0.0220953	-11.9829	-7.8725	772	1.34123e-08
GRAP	0.0501661	-11.9687	-7.85837	252	1.38557e-08
KLF11	0.113985	-11.9622	-7.85188	149	1.40644e-08
NUB1	0.021547	-11.9618	-7.85143	874	1.40789e-08
MAF	0.021836	-11.9581	-7.84778	809	1.41978e-08
DDT	0.0234909	-11.9141	-7.80375	1118	1.57125e-08
FAS	0.0293745	-11.9074	-7.79705	462	1.59569e-08
MYD88	0.0656859	-11.9026	-7.7922	214	1.6136e-08
CTSA	0.0224726	-11.9022	-7.79188	711	1.61482e-08
ENSSSCG00000026055	0.104965	-11.8864	-7.77603	159	1.67482e-08
CLTA	0.0220233	-11.8767	-7.7663	775	1.71276e-08
GSTO1	0.0784164	-11.8554	-7.74504	193	1.7987e-08
DENND5A	0.0736839	-11.832	-7.72168	200	1.89809e-08
SPC25	0.46261	-11.8294	-7.71908	42	1.9095e-08
LSM3	0.0225131	-11.8236	-7.71327	697	1.9352e-08
ENSSSCG00000015390	0.0754669	-11.7962	-7.68582	197	2.06151e-08
ENSSSCG00000036658	0.0215868	-11.7913	-7.68095	958	2.08473e-08
BUB3	0.0238788	-11.7878	-7.67746	567	2.10157e-08
PSMB1	0.0261274	-11.7857	-7.6753	1334	2.11201e-08
EIF2B2	0.0466114	-11.7607	-7.65036	264	2.23689e-08
SOD1	0.0261129	-11.7557	-7.64538	1334	2.26264e-08
SRP54	0.0341223	-11.7448	-7.63447	395	2.32024e-08
MAPK1IP1L	0.0222683	-11.7298	-7.61946	729	2.40179e-08
ODC1	0.0355014	-11.7285	-7.61816	372	2.40904e-08
VTI1B	0.0231382	-11.7178	-7.60742	603	2.46934e-08
ENSSSCG00000032942	0.0357033	-11.7136	-7.60328	368	2.49298e-08
ENSSSCG00000001505	0.0228308	-11.7133	-7.603	631	2.49462e-08
FABP5	0.0763997	-11.71	-7.59969	195	2.51366e-08
RPS21	0.0260854	-11.699	-7.58861	1334	2.57864e-08
ENSSSCG00000005095	0.0414572	-11.6974	-7.58709	293	2.58768e-08
ARF6	0.0260823	-11.6924	-7.58204	1334	2.61793e-08
DUSP10	0.0884447	-11.6907	-7.58039	178	2.62788e-08
RHEB	0.0214019	-11.6779	-7.56756	907	2.70672e-08
HPF1	0.0232232	-11.6605	-7.55013	595	2.81754e-08
RHOG	0.026093	-11.6312	-7.52083	1283	3.01421e-08
ENSSSCG00000016711	0.0222112	-11.6312	-7.52081	730	3.01429e-08
UCHL5	0.0228667	-11.6183	-7.50797	621	3.10479e-08
DPP3	0.161991	-11.6131	-7.50274	75	3.14239e-08
DERL1	0.0225373	-11.5827	-7.47235	666	3.37018e-08
ENSSSCG00000027723	0.0500425	-11.5564	-7.44602	249	3.58079e-08
ZNF106	0.124434	-11.5536	-7.44325	132	3.60368e-08
FLOT1	0.0373595	-11.5503	-7.43994	335	3.63132e-08
GLRX3	0.0228739	-11.542	-7.43162	616	3.70156e-08
VRK1	0.0567855	-11.5367	-7.42632	230	3.74697e-08
MRPL24	0.02943	-11.5319	-7.42154	456	3.78844e-08
RTCB	0.0427003	-11.5204	-7.41	282	3.89046e-08
TMEM258	0.0227381	-11.5051	-7.39472	1084	4.02977e-08
PITHD1	0.0306463	-11.5002	-7.38988	439	4.0749e-08
ARRB2	0.0331148	-11.4965	-7.38614	405	4.11015e-08
NSUN6	0.147631	-11.4909	-7.38051	87	4.16381e-08
TSPAN31	0.0221705	-11.4772	-7.36689	724	4.29641e-08
ENSSSCG00000012178	0.022241	-11.4714	-7.36101	712	4.35501e-08
TNFRSF4	0.106112	-11.4617	-7.35131	154	4.4534e-08
EXO1	0.180127	-11.4554	-7.34501	67	4.51842e-08
RHOA	0.0259072	-11.4315	-7.32113	1272	4.77389e-08
SPDL1	0.963035	-11.4232	-7.31289	31	4.86534e-08
EIF3I	0.0251496	-11.423	-7.31265	1216	4.86797e-08
CHEK2	0.230267	-11.4207	-7.31034	57	4.894e-08
ENSSSCG00000035089	3.96027	-11.4191	-7.30877	17	4.91171e-08
EIF4E	0.0370698	-11.407	-7.29667	336	5.05042e-08
PLAAT3	0.104864	-11.4007	-7.29039	155	5.12405e-08
DCP2	0.0363175	-11.3842	-7.27383	348	5.32318e-08
ELK3	0.0393903	-11.3713	-7.26095	306	5.4834e-08
ENSSSCG00000020808	0.023016	-11.3711	-7.26071	597	5.48648e-08
TRAPPC3	0.0326578	-11.3574	-7.247	409	5.6624e-08
WDR1	0.0245247	-11.3563	-7.24595	1184	5.67616e-08
DEPDC1B	1.03898	-11.3508	-7.24046	30	5.74831e-08
POLE4	0.0237155	-11.3495	-7.23918	1143	5.7653e-08
TAMM41	0.120324	-11.341	-7.23068	135	5.87925e-08
TERF1	0.039518	-11.3275	-7.21717	304	6.06493e-08
ENSSSCG00000034927	0.025822	-11.3226	-7.21225	509	6.13402e-08
MTHFD1	0.0900907	-11.3136	-7.20322	173	6.26302e-08
PDCD5	0.022256	-11.3132	-7.2028	694	6.26896e-08
CLNS1A	0.0269102	-11.3075	-7.19719	490	6.35058e-08
UBAC1	0.166733	-11.297	-7.18663	71	6.50679e-08
KXD1	0.0258873	-11.2924	-7.18205	1334	6.57578e-08
DHX15	0.0369838	-11.2713	-7.16094	334	6.9033e-08
HADHA	0.0337967	-11.2657	-7.15535	390	6.99283e-08
RNASEH2C	0.0217874	-11.2655	-7.15515	766	6.99598e-08
PLEKHA1	0.0409172	-11.2626	-7.15222	291	7.0434e-08
NONO	0.0216354	-11.2602	-7.14981	789	7.08259e-08
ERH	0.0258689	-11.2548	-7.14441	1334	7.17116e-08
PSMB8	0.0258649	-11.2467	-7.13639	1334	7.30489e-08
ZBTB10	0.156209	-11.2413	-7.13097	76	7.39654e-08
ENSSSCG00000032459	0.025234	-11.225	-7.11464	519	7.6799e-08
CCDC51	0.161298	-11.2112	-7.10088	73	7.92713e-08
SUCLG1	0.0233429	-11.2021	-7.09178	1127	8.09503e-08
RCBTB2	0.0885805	-11.1832	-7.07284	174	8.45581e-08
CASP3	0.0944229	-11.1445	-7.03412	166	9.24449e-08
BAZ1A	0.021265	-11.1432	-7.0329	944	9.27052e-08
CCT4	0.0238726	-11.1002	-6.98987	1157	1.02359e-07
DNAJB4	0.0546549	-11.0901	-6.97971	232	1.04782e-07
HLA-DOB	0.141962	-11.0804	-6.97	90	1.07152e-07
CCDC59	0.0251646	-11.0729	-6.96254	518	1.0901e-07
GRHPR	0.0471835	-11.0556	-6.94524	255	1.13438e-07
TXNDC17	0.0257217	-11.0494	-6.93909	1274	1.15056e-07
PDIA3	0.0211905	-11.0471	-6.93675	860	1.15677e-07
CASP6	0.0411498	-11.024	-6.91361	286	1.22007e-07
HAVCR2	0.141276	-11.0119	-6.90154	90	1.25446e-07
SLBP	0.0384781	-11.0098	-6.89947	309	1.26047e-07
ATP5MD	0.0258397	-11.0045	-6.89411	1303	1.2761e-07
EIF3F	0.0324491	-10.9825	-6.87215	405	1.34229e-07
ZNF831	0.143719	-10.981	-6.87063	85	1.34701e-07
PCBD2	0.0377323	-10.9787	-6.86831	317	1.35422e-07
ENSSSCG00000012517	0.0249832	-10.962	-6.85166	520	1.40714e-07
EVL	0.0257217	-10.9561	-6.84574	1334	1.42645e-07
ARF4	0.025719	-10.9505	-6.84014	1334	1.44497e-07
RHNO1	0.193294	-10.9474	-6.837	62	1.45547e-07
SAMD4A	0.264127	-10.9218	-6.81142	52	1.54375e-07
INKA1	0.136574	-10.9209	-6.81058	101	1.54674e-07
NOP10	0.0257026	-10.9175	-6.80716	1334	1.55896e-07
IL10RA	0.050267	-10.9155	-6.80513	243	1.56629e-07
H3F3A	0.0256986	-10.9094	-6.79903	1334	1.58842e-07
MRPL51	0.0825487	-10.8785	-6.76818	180	1.70537e-07
ENSSSCG00000031300	0.47667	-10.8502	-6.73986	40	1.82028e-07
EGR1	0.14002	-10.8408	-6.73047	89	1.86009e-07
CD74	0.0256607	-10.8329	-6.72255	1334	1.89429e-07
RFK	0.132784	-10.8296	-6.71922	108	1.90887e-07
TMBIM6	0.0256506	-10.8126	-6.70226	1334	1.98489e-07
TMEM70	0.111354	-10.8042	-6.69386	141	2.02367e-07
TENT5A	0.110598	-10.804	-6.69363	142	2.02475e-07
DYNLRB1	0.0218702	-10.803	-6.69269	715	2.02913e-07
SND1	0.035642	-10.7969	-6.6865	344	2.05825e-07
METAP2	0.0218882	-10.7952	-6.68488	711	2.06596e-07
TMEM199	0.165565	-10.7671	-6.65675	69	2.20419e-07
BID	0.031526	-10.7354	-6.62504	414	2.37115e-07
GPR34	0.0701992	-10.735	-6.62463	198	2.37339e-07
C21orf91	0.0216417	-10.7318	-6.62148	747	2.39069e-07
ALKBH3	0.194862	-10.7218	-6.61142	61	2.44671e-07
ZWILCH	0.109185	-10.7202	-6.60984	143	2.45563e-07
AHR	0.0750511	-10.7189	-6.60855	190	2.46293e-07
MRPS5	0.0531702	-10.71	-6.59965	233	2.51393e-07
NMRAL1	0.0449641	-10.7094	-6.599	261	2.51769e-07
PELI1	0.0376946	-10.7078	-6.59749	312	2.52642e-07
PLEKHB2	0.0342856	-10.7019	-6.5915	367	2.56151e-07
STIP1	0.0260736	-10.6912	-6.5808	495	2.6254e-07
TXNL4A	0.0259471	-10.6766	-6.56624	497	2.71497e-07
DCTN2	0.0326869	-10.6757	-6.56534	395	2.72057e-07
EPSTI1	0.023561	-10.6481	-6.53772	1152	2.89923e-07
CDKN3	0.116578	-10.6416	-6.53121	132	2.94301e-07
ANAPC15	0.0402784	-10.6371	-6.52672	287	2.97356e-07
MRPL44	0.0383939	-10.6274	-6.51704	303	3.04062e-07
UBXN11	0.0301503	-10.6263	-6.51591	432	3.04853e-07
RUVBL1	0.0596427	-10.6188	-6.5084	217	3.10172e-07
ZNF638	0.0590869	-10.5928	-6.48243	218	3.29287e-07
TPR	0.0216626	-10.5739	-6.46358	1031	3.43893e-07
CSK	0.0215211	-10.5739	-6.46357	1017	3.43899e-07
PHGDH	0.222529	-10.5653	-6.45493	56	3.50806e-07
HSPD1	0.0243219	-10.5368	-6.4264	1195	3.74628e-07
MDH2	0.0296217	-10.5291	-6.41873	438	3.81299e-07
RASA3	0.143376	-10.5252	-6.41483	80	3.84739e-07
PHF5A	0.0215638	-10.5095	-6.39913	741	3.98903e-07
BIN2	0.0216913	-10.4784	-6.36805	716	4.28495e-07
METTL9	0.0394613	-10.4767	-6.36632	291	4.30214e-07
VAMP5	0.0250289	-10.4686	-6.35824	511	4.38292e-07
ERP29	0.0297783	-10.4253	-6.31496	434	4.84218e-07
FKBP3	0.0212601	-10.3985	-6.28811	782	5.15102e-07
NDUFAF5	0.134019	-10.397	-6.28667	93	5.16812e-07
ENSSSCG00000000097	0.0218166	-10.3956	-6.28526	1051	5.18489e-07
RFC1	0.0219132	-10.3943	-6.28392	657	5.20087e-07
RBMX	0.0209179	-10.3928	-6.28248	854	5.21814e-07
ENSSSCG00000008722	0.134528	-10.3739	-6.26359	91	5.45012e-07
METTL23	0.109336	-10.3684	-6.2581	139	5.51955e-07
ATRX	0.0212253	-10.3633	-6.25297	785	5.58504e-07
AK6	0.0606298	-10.3564	-6.24608	213	5.67439e-07
CBX1	0.103276	-10.3373	-6.22698	147	5.92946e-07
SDF2	0.0273786	-10.3172	-6.20684	468	6.21098e-07
SEPT9	0.02796	-10.312	-6.20161	459	6.28622e-07
EIF3L	0.0209039	-10.29	-6.1796	844	6.61307e-07
ENSSSCG00000001398	0.0253887	-10.2897	-6.17931	1334	6.61747e-07
ENSSSCG00000037399	0.0360478	-10.275	-6.16467	324	6.84427e-07
ARMC1	0.0839897	-10.2618	-6.1515	173	7.05512e-07
TNFAIP8L2	0.133389	-10.2582	-6.14781	91	7.11529e-07
ENSSSCG00000008898	0.0357515	-10.2576	-6.14723	328	7.12479e-07
ENSSSCG00000009851	0.0208617	-10.2549	-6.14459	852	7.16823e-07
TAF2	0.0867248	-10.2532	-6.14281	169	7.19768e-07
ENSSSCG00000015040	0.0254473	-10.2508	-6.14046	1308	7.23663e-07
EMP1	0.147025	-10.248	-6.13766	75	7.28358e-07
DNAJA2	0.023531	-10.2433	-6.13296	543	7.36267e-07
SDHAF2	0.037246	-10.2404	-6.13009	308	7.41158e-07
ENSSSCG00000010519	0.104703	-10.2375	-6.12717	144	7.46156e-07
AVPI1	0.132431	-10.2352	-6.1248	93	7.50241e-07
UQCRC1	0.0209792	-10.2254	-6.11505	964	7.6728e-07
RBM39	0.0253526	-10.2183	-6.10792	1334	7.79982e-07
CHMP2A	0.152067	-10.2134	-6.10307	72	7.88732e-07
DBNL	0.0275077	-10.1891	-6.07878	464	8.3411e-07
CEP78	0.156189	-10.189	-6.07863	70	8.34398e-07
NFYB	0.0523836	-10.1833	-6.0729	231	8.45466e-07
GNG3	0.186907	-10.1791	-6.06875	61	8.53594e-07
NUDC	0.0209747	-10.1781	-6.06779	815	8.55484e-07
ENSSSCG00000013155	0.024771	-10.1511	-6.04078	511	9.10379e-07
TXNIP	0.0419502	-10.1452	-6.03485	270	9.22883e-07
KLK7	0.127038	-10.1409	-6.03056	106	9.32057e-07
ENSSSCG00000012961	0.0252931	-10.1009	-5.99053	1334	1.02205e-06
KHDRBS1	0.021389	-10.0983	-5.98799	734	1.02803e-06
ENSSSCG00000015215	0.501678	-10.0963	-5.98594	38	1.03291e-06
PHIP	0.0330964	-10.0937	-5.9833	373	1.03921e-06
TECR	0.0254759	-10.0686	-5.95828	496	1.10084e-06
PSMA6	0.0241486	-10.0605	-5.95019	1199	1.12152e-06
SDF2L1	0.0298843	-10.0579	-5.94751	426	1.12847e-06
ENSSSCG00000037141	0.0305846	-10.0401	-5.92977	415	1.17552e-06
ENSSSCG00000003771	0.0232475	-10.0248	-5.9144	547	1.21787e-06
PTPN7	0.036784	-10.0235	-5.91313	309	1.22142e-06
AKR1A1	0.0270763	-10.0132	-5.90284	468	1.25071e-06
IL2RA	0.0680691	-9.97961	-5.86925	196	1.35128e-06
CHCHD7	0.0255618	-9.9792	-5.86884	493	1.35256e-06
ENSSSCG00000038444	0.0207664	-9.96752	-5.85717	841	1.38942e-06
SIGIRR	0.0281185	-9.96408	-5.85372	451	1.40047e-06
RBM5	0.0334921	-9.9604	-5.85005	361	1.41239e-06
DLAT	0.127844	-9.95825	-5.8479	99	1.41939e-06
MND1	0.109451	-9.95618	-5.84583	134	1.42617e-06
RPAP2	0.0307207	-9.94546	-5.8351	411	1.46183e-06
IWS1	0.0460534	-9.93654	-5.82619	249	1.49215e-06
HERPUD2	0.031856	-9.9331	-5.82274	392	1.50403e-06
ARPC3	0.0251987	-9.91568	-5.80532	1334	1.56558e-06
TP53INP1	0.0368585	-9.91332	-5.80297	306	1.57411e-06
TIMM10	0.0299894	-9.87479	-5.76444	421	1.72014e-06
FAM120A	0.0388293	-9.872	-5.76165	287	1.73121e-06
ENSSSCG00000000849	0.0211316	-9.86763	-5.75727	758	1.74875e-06
IMMP1L	0.0342507	-9.86462	-5.75427	343	1.76088e-06
ENSSSCG00000016451	0.108685	-9.86356	-5.7532	134	1.76522e-06
ZBTB20	0.124211	-9.84484	-5.73448	106	1.84297e-06
ATP6V1D	0.0366489	-9.84421	-5.73386	307	1.84563e-06
ZCCHC17	0.0348278	-9.83884	-5.72849	332	1.86858e-06
CCR5	0.090369	-9.82912	-5.71877	160	1.91087e-06
YKT6	0.0256322	-9.80964	-5.69929	489	1.99855e-06
ENSSSCG00000003253	0.0373441	-9.80826	-5.6979	299	2.00492e-06
RNPS1	0.0227008	-9.80608	-5.69572	1127	2.015e-06
EIF1B	0.022062	-9.80497	-5.69462	1088	2.02015e-06
TAP1	0.021348	-9.79813	-5.68777	711	2.05224e-06
UBR7	0.129459	-9.77121	-5.66086	89	2.18345e-06
ENSSSCG00000014250	0.139061	-9.76967	-5.65931	77	2.19123e-06
SQSTM1	0.0214481	-9.76265	-5.65229	683	2.22694e-06
FH	0.02186	-9.7349	-5.62454	609	2.37386e-06
ENSSSCG00000013436	0.020575	-9.73244	-5.62208	877	2.38736e-06
MCEE	0.0924582	-9.72539	-5.61504	156	2.4264e-06
ENSSSCG00000039740	0.0251002	-9.72347	-5.61311	1334	2.43717e-06
RXRB	0.121243	-9.71569	-5.60534	110	2.48121e-06
SMNDC1	0.0207669	-9.71463	-5.60428	812	2.48727e-06
HERC2	0.0985462	-9.70246	-5.59211	147	2.55794e-06
BMF	0.133061	-9.69676	-5.58641	82	2.59174e-06
AURKAIP1	0.0234742	-9.69284	-5.58248	533	2.61528e-06
PTPN22	0.0219697	-9.68421	-5.57386	597	2.66773e-06
GBP2	0.0276751	-9.67261	-5.56226	453	2.73994e-06
NFKB2	0.0371857	-9.66342	-5.55307	298	2.79855e-06
CD48	0.0321739	-9.6618	-5.55145	379	2.80899e-06
ENSSSCG00000014618	0.0408425	-9.61651	-5.50615	270	3.11779e-06
NUP205	0.212787	-9.61537	-5.50502	55	3.12597e-06
HIST1H2BB	0.127415	-9.60532	-5.49497	90	3.19914e-06
ENSSSCG00000009327	0.0250378	-9.60244	-5.49209	1334	3.22041e-06
ENSSSCG00000027085	0.0210512	-9.59634	-5.48599	747	3.26598e-06
ENSSSCG00000012523	0.193418	-9.58929	-5.47894	58	3.31942e-06
PQBP1	0.0228737	-9.58373	-5.47337	549	3.36222e-06
CDKN2AIPNL	0.0206437	-9.57665	-5.4663	825	3.41747e-06
ODF2	0.118517	-9.57609	-5.46574	113	3.42184e-06
S100A13	0.0288889	-9.55232	-5.44197	432	3.61438e-06
ENSSSCG00000033700	0.0328709	-9.54448	-5.43413	361	3.68022e-06
ATP6V1C1	0.0878083	-9.54085	-5.4305	161	3.71108e-06
SRSF10	0.0206179	-9.53936	-5.42901	827	3.72386e-06
ERAP2	0.0334347	-9.53599	-5.42564	349	3.75283e-06
UBE2S	0.101991	-9.52916	-5.41881	140	3.81236e-06
NEK6	0.276749	-9.52522	-5.41487	48	3.84709e-06
ENSSSCG00000017146	0.0268306	-9.52435	-5.414	464	3.85481e-06
C5orf24	0.0331734	-9.52434	-5.41399	354	3.85487e-06
INPP4B	0.0375546	-9.51221	-5.40186	292	3.96408e-06
DCUN1D1	0.032819	-9.50983	-5.39948	361	3.98587e-06
RIOK3	0.0215406	-9.50474	-5.39439	630	4.03286e-06
LBH	0.0214375	-9.47851	-5.36815	645	4.28397e-06
ENSSSCG00000016464	0.181315	-9.4739	-5.36354	60	4.32969e-06
CHTOP	0.0279014	-9.47211	-5.36176	446	4.3475e-06
ENSSSCG00000007947	0.0342313	-9.46748	-5.35713	332	4.39411e-06
ENSSSCG00000013596	0.020482	-9.46739	-5.35704	860	4.39504e-06
ENSSSCG00000000611	0.022002	-9.46323	-5.35287	585	4.4374e-06
CEND1	0.133539	-9.46304	-5.35268	79	4.43934e-06
CDC123	0.022697	-9.45357	-5.34322	552	4.53713e-06
DDX6	0.0217929	-9.44556	-5.33521	599	4.62158e-06
NASP	0.0362882	-9.4327	-5.32235	303	4.76048e-06
TMEM160	0.0234626	-9.43209	-5.32173	528	4.76723e-06
DUSP23	0.123386	-9.43152	-5.32117	97	4.77346e-06
MRPS36	0.0328337	-9.42567	-5.31531	358	4.83822e-06
TMCO1	0.020599	-9.42539	-5.31504	956	4.84131e-06
JMJD6	0.0689427	-9.42304	-5.31269	190	4.86759e-06
ADCY3	0.0742178	-9.42205	-5.3117	181	4.87869e-06
MZT1	0.0555183	-9.41539	-5.30504	217	4.9541e-06
NENF	0.0917008	-9.41507	-5.30471	154	4.95779e-06
SELL	0.196268	-9.40873	-5.29838	57	5.03061e-06
SRR	0.12153	-9.40331	-5.29296	102	5.09381e-06
GSTA4	0.0313434	-9.40312	-5.29276	388	5.09607e-06
TXNL4B	0.126834	-9.4027	-5.29235	87	5.10098e-06
NDUFC1	0.0240796	-9.38918	-5.27882	1216	5.26232e-06
CHST10	0.130833	-9.3884	-5.27805	81	5.27173e-06
CENPH	0.0888119	-9.38575	-5.2754	158	5.30395e-06
RHOF	0.0283111	-9.38558	-5.27523	438	5.30604e-06
TAF1D	0.0249214	-9.37799	-5.26763	1334	5.39965e-06
CCT7	0.0212057	-9.3707	-5.26035	1036	5.49097e-06
RPL5	0.0249156	-9.36681	-5.25646	1334	5.54041e-06
GINS3	1.39344	-9.34367	-5.23332	24	5.84361e-06
NDUFAF3	0.0230709	-9.34213	-5.23178	537	5.86436e-06
PNPLA8	0.0342058	-9.34211	-5.23176	329	5.86465e-06
FKBP8	0.0357562	-9.33119	-5.22083	307	6.01406e-06
RAD21	0.0211293	-9.33116	-5.22081	702	6.01439e-06
TIPARP	0.0324329	-9.31411	-5.20376	363	6.25518e-06
LEO1	0.0798284	-9.31042	-5.20006	171	6.30864e-06
DUSP14	0.0830208	-9.30632	-5.19597	166	6.36839e-06
CCDC28A	0.0735852	-9.29998	-5.18962	181	6.46214e-06
ATP5F1C	0.0208569	-9.295	-5.18464	1003	6.53666e-06
ENSSSCG00000027988	0.0332062	-9.2925	-5.18215	346	6.57431e-06
PIN4	0.0406651	-9.28628	-5.17593	267	6.66917e-06
EIF4H	0.020366	-9.27815	-5.1678	884	6.79523e-06
MRPL22	0.0281172	-9.2723	-5.16195	439	6.88738e-06
RAD23A	0.024554	-9.25039	-5.14003	500	7.24378e-06
HCLS1	0.0203827	-9.24207	-5.13171	918	7.38394e-06
AKIP1	0.0532765	-9.23364	-5.12328	221	7.52864e-06
ENSSSCG00000001341	0.0248446	-9.23094	-5.12059	1334	7.5755e-06
EXOSC5	0.0902499	-9.20437	-5.09402	154	8.0534e-06
DDX46	0.0209407	-9.20101	-5.09066	1017	8.11605e-06
POLD2	0.124308	-9.19355	-5.08319	88	8.25675e-06
IRF4	0.085545	-9.1891	-5.07875	161	8.34163e-06
ENSSSCG00000024313	0.0217407	-9.18873	-5.07838	1085	8.34879e-06
MFSD10	0.0369428	-9.18277	-5.07241	292	8.46423e-06
HELZ	0.0376234	-9.17357	-5.06322	286	8.64534e-06
CPSF4	0.116864	-9.1531	-5.04274	108	9.06273e-06
ENSSSCG00000007749	0.0328434	-9.15285	-5.0425	349	9.0678e-06
NEDD8	0.0229936	-9.15198	-5.04162	1161	9.08609e-06
ENSSSCG00000013318	0.148758	-9.13784	-5.02749	68	9.38669e-06
GGH	0.119283	-9.1308	-5.02044	101	9.54016e-06
TMEM71	0.091681	-9.12598	-5.01562	151	9.64666e-06
THOC7	0.0211061	-9.11755	-5.00719	675	9.83576e-06
ENSSSCG00000032311	0.0762333	-9.11588	-5.00553	175	9.87354e-06
MRPL13	0.111263	-9.11466	-5.00431	119	9.90128e-06
RGS19	0.0221206	-9.11342	-5.00306	566	9.92973e-06
CTSD	0.021026	-9.11279	-5.00243	697	9.9441e-06
CHAF1B	1.34924	-9.11143	-5.00108	24	9.97527e-06
SNU13	0.0247808	-9.10915	-4.9988	1334	1.00277e-05
ENSSSCG00000031073	0.0353547	-9.10117	-4.99082	307	1.02136e-05
GADD45GIP1	0.0240821	-9.0932	-4.98285	507	1.04029e-05
ETV6	0.128715	-9.08554	-4.97519	80	1.0588e-05
NNT	0.0656819	-9.07142	-4.96106	193	1.0938e-05
DTX2	0.0906023	-9.0656	-4.95524	152	1.10855e-05
SPPL2A	0.0290612	-9.02899	-4.91864	419	1.20605e-05
TXN2	0.0234536	-9.01915	-4.90879	520	1.23369e-05
SSR3	0.0230667	-9.0134	-4.90305	1169	1.25011e-05
LBR	0.0216472	-9.0127	-4.90235	589	1.25213e-05
YEATS4	0.0368463	-9.01204	-4.90169	290	1.25403e-05
UNG	0.170112	-9.00819	-4.89783	61	1.26522e-05
TMEM50A	0.0247276	-9.00817	-4.89781	1334	1.26529e-05
SLA-DQB1	0.0333247	-9.00786	-4.89751	335	1.26617e-05
FLNA	0.100413	-9.0032	-4.89284	136	1.27985e-05
DDX21	0.0207086	-9.00163	-4.89128	752	1.28447e-05
DAD1	0.0245719	-9.00135	-4.891	1271	1.2853e-05
VARS	0.117102	-8.97209	-4.86173	103	1.37488e-05
GALK1	0.124369	-8.96866	-4.85831	84	1.38578e-05
TLE1	0.121564	-8.95554	-4.84519	89	1.42827e-05
RABGGTB	0.0222613	-8.9512	-4.84085	555	1.44263e-05
SEC61G	0.0244942	-8.94673	-4.83638	1266	1.45755e-05
LPIN1	0.0667197	-8.94644	-4.83608	190	1.45854e-05
NUDT5	0.0402852	-8.94587	-4.83551	265	1.46046e-05
TXNDC16	0.132971	-8.92833	-4.81797	75	1.52064e-05
ARL5B	0.0335772	-8.91995	-4.8096	328	1.55025e-05
HAUS2	0.0940649	-8.91791	-4.80756	145	1.55755e-05
GNG2	0.0246788	-8.89821	-4.78786	1332	1.62984e-05
GABARAP	0.024664	-8.88794	-4.77758	1334	1.66885e-05
BRCA1	0.249817	-8.8847	-4.77435	49	1.68132e-05
DNAJC2	0.0220674	-8.87898	-4.76862	561	1.70364e-05
UTP25	0.133816	-8.86835	-4.75799	74	1.74586e-05
ENSSSCG00000004666	0.0208424	-8.86013	-4.74977	707	1.77921e-05
ARID5A	0.0260217	-8.85196	-4.74161	466	1.81298e-05
RCSD1	0.0257793	-8.83895	-4.7286	470	1.86811e-05
ENSSSCG00000013052	0.0209841	-8.81739	-4.70704	659	1.9632e-05
C18orf32	0.0209883	-8.81205	-4.70169	657	1.9875e-05
PUS1	0.122206	-8.81122	-4.70086	85	1.99131e-05
ENSSSCG00000040801	0.0312265	-8.80844	-4.69809	373	2.00408e-05
ARFGAP3	0.0210141	-8.80212	-4.69177	649	2.03344e-05
ENSSSCG00000008035	0.0344323	-8.79728	-4.68693	312	2.05624e-05
NXT2	0.0525894	-8.78758	-4.67723	219	2.10267e-05
UMAD1	0.0432046	-8.77935	-4.669	249	2.14291e-05
BUD23	0.020216	-8.77629	-4.66593	932	2.15807e-05
GOT2	0.0294341	-8.77217	-4.66182	407	2.17863e-05
ENO1	0.0246021	-8.77151	-4.66116	1334	2.18192e-05
TIMM13	0.0294879	-8.76998	-4.65962	406	2.18967e-05
ENSSSCG00000037565	0.0549388	-8.76641	-4.65606	213	2.20771e-05
ENSSSCG00000015337	0.0245911	-8.75097	-4.64062	1334	2.28762e-05
SRSF3	0.0871334	-8.74906	-4.63871	154	2.29768e-05
BCAS4	0.0257428	-8.74687	-4.63652	469	2.30932e-05
IFI44L	0.0202627	-8.73978	-4.62942	948	2.34735e-05
ENSSSCG00000021560	0.0206489	-8.73826	-4.62791	1007	2.35555e-05
TRAPPC6A	0.132411	-8.73602	-4.62566	74	2.36776e-05
ATP23	0.103554	-8.73296	-4.6226	127	2.3845e-05
ENSSSCG00000023850	0.268099	-8.71236	-4.602	47	2.50033e-05
CDK2AP1	0.0327957	-8.71129	-4.60094	336	2.50647e-05
ENSSSCG00000006179	0.123263	-8.7095	-4.59915	82	2.51683e-05
ATF7IP	0.0296584	-8.6894	-4.57905	401	2.63604e-05
COPS5	0.0299725	-8.68284	-4.57249	395	2.67617e-05
BRD3	0.0665525	-8.68213	-4.57177	188	2.68058e-05
TSPYL2	0.0433969	-8.66298	-4.55262	247	2.80141e-05
CDC5L	0.0203493	-8.65477	-4.54441	788	2.85488e-05
PPP1R15B	0.0280481	-8.64707	-4.53672	428	2.90592e-05
CENPL	0.697071	-8.64366	-4.5333	31	2.92885e-05
DFFB	0.116143	-8.63857	-4.52822	96	2.96333e-05
SPAG8	0.0215024	-8.63646	-4.5261	582	2.97782e-05
ENSSSCG00000013391	0.0540524	-8.6329	-4.52254	214	3.00233e-05
ENSSSCG00000005658	0.0325512	-8.62299	-4.51263	338	3.07162e-05
RASA1	0.0334406	-8.61664	-4.50629	322	3.11682e-05
PNISR	0.0245377	-8.61618	-4.50583	1301	3.12015e-05
ITM2B	0.0245152	-8.6089	-4.49854	1334	3.17292e-05
ATPSCKMT	0.3061	-8.60739	-4.49703	44	3.18395e-05
ZMAT5	0.0480484	-8.59275	-4.4824	230	3.29307e-05
ENSSSCG00000002841	0.0422718	-8.58696	-4.47661	251	3.33728e-05
METTL3	0.113732	-8.57598	-4.46563	102	3.42271e-05
PTPN18	0.0244968	-8.57462	-4.46426	1334	3.43349e-05
TARS	0.038644	-8.57095	-4.4606	270	3.46262e-05
PRDM4	0.122691	-8.56969	-4.45934	81	3.47264e-05
EIF4B	0.0207367	-8.56133	-4.45098	1025	3.54013e-05
ENSSSCG00000010517	0.0204724	-8.5609	-4.45055	995	3.54364e-05
TIAM1	0.0790995	-8.56068	-4.45032	165	3.54549e-05
EIF3A	0.0204936	-8.55536	-4.44501	998	3.58915e-05
RPL26L1	0.0200573	-8.55087	-4.44051	910	3.62649e-05
INKA2	0.424832	-8.54053	-4.43018	38	3.71384e-05
CISD2	0.0276779	-8.53709	-4.42673	432	3.74342e-05
ETHE1	0.0375358	-8.53357	-4.42321	277	3.77387e-05
CPSF2	0.0488648	-8.53223	-4.42187	227	3.78554e-05
GPI	0.0242574	-8.52969	-4.41934	493	3.80767e-05
PCBP2	0.0207957	-8.52561	-4.41526	663	3.84362e-05
ENSSSCG00000005436	0.0247542	-8.51808	-4.40773	483	3.91088e-05
UPP1	0.17157	-8.50127	-4.39092	59	4.06519e-05
DAZAP1	0.0264591	-8.50002	-4.38966	452	4.07697e-05
MT1A	0.262364	-8.49096	-4.38061	47	4.16287e-05
EMP3	0.0222013	-8.48807	-4.37772	1135	4.19068e-05
GSR	0.0889747	-8.47756	-4.36721	148	4.29332e-05
EPB41	0.0209302	-8.46965	-4.35929	626	4.37227e-05
UBE2J2	0.0732356	-8.46656	-4.35621	174	4.40346e-05
ENSSSCG00000006081	0.0244349	-8.45949	-4.34913	1334	4.47575e-05
ENSSSCG00000027689	0.0464022	-8.45839	-4.34803	234	4.48713e-05
PRR11	0.586748	-8.45205	-4.3417	33	4.55306e-05
DDX27	0.0330242	-8.44053	-4.33017	324	4.67551e-05
ASH2L	0.115486	-8.40027	-4.28992	91	5.12957e-05
ETFB	0.0213251	-8.39611	-4.28576	583	5.17898e-05
ENSSSCG00000007944	0.0330003	-8.38998	-4.27963	323	5.25257e-05
OXCT1	0.113432	-8.38131	-4.27096	97	5.35845e-05
ENSSSCG00000001414	0.0199579	-8.36169	-4.25134	902	5.6061e-05
TRERF1	0.086281	-8.35562	-4.24526	151	5.68511e-05
MRPS31	0.0350015	-8.35508	-4.24473	296	5.69206e-05
YAE1	0.0381792	-8.35084	-4.24049	270	5.74794e-05
ENSSSCG00000017754	0.0239847	-8.33742	-4.22707	495	5.92836e-05
THYN1	0.0206394	-8.33083	-4.22047	676	6.01904e-05
NR1D2	0.0967896	-8.32779	-4.21744	133	6.06128e-05
TRAF3	0.0310344	-8.3263	-4.21595	361	6.08207e-05
SNRNP25	0.022067	-8.32568	-4.21533	545	6.09081e-05
AGK	0.048563	-8.32361	-4.21326	226	6.11985e-05
ENSSSCG00000008352	0.0381148	-8.32041	-4.21005	270	6.16519e-05
MRPL11	0.0215788	-8.30682	-4.19647	565	6.36114e-05
ENSSSCG00000014371	0.0241534	-8.30539	-4.19503	1269	6.38218e-05
SURF2	0.118546	-8.30126	-4.19091	83	6.44309e-05
MTX2	0.0695339	-8.30102	-4.19066	179	6.44672e-05
XPO1	0.0357217	-8.3009	-4.19054	288	6.44846e-05
ENSSSCG00000007692	0.0509549	-8.29669	-4.18633	219	6.51131e-05
SERP1	0.0220865	-8.29291	-4.18255	1134	6.5682e-05
METTL21A	0.0357912	-8.2792	-4.16885	287	6.77883e-05
SLC9A9	0.0587309	-8.26367	-4.15332	200	7.02558e-05
TRIM38	0.0476829	-8.25244	-4.14208	228	7.20968e-05
ST8SIA1	0.0595884	-8.24678	-4.13642	198	7.30431e-05
ENSSSCG00000037431	0.0380811	-8.23158	-4.12123	269	7.5644e-05
LACTB2	0.0707759	-8.22336	-4.113	176	7.70896e-05
RRP9	0.113366	-8.21255	-4.10219	92	7.90326e-05
EZR	0.0239534	-8.21006	-4.09971	1255	7.94859e-05
NOP53	0.0202161	-8.19888	-4.08852	982	8.15598e-05
REXO2	0.0271528	-8.19723	-4.08688	434	8.18695e-05
SSH1	0.05655	-8.16763	-4.05727	204	8.76451e-05
PSMD2	0.0202902	-8.15726	-4.0469	743	8.97629e-05
TMEM109	0.131155	-8.15668	-4.04633	71	8.98819e-05
PSEN2	0.106017	-8.15518	-4.04483	112	9.01933e-05
DUSP6	0.0942132	-8.14804	-4.03768	135	9.16887e-05
ENSSSCG00000035650	0.0284951	-8.14709	-4.03674	409	9.18891e-05
HAT1	0.113689	-8.12897	-4.01862	89	9.5804e-05
RPF2	0.0870266	-8.12217	-4.01181	147	9.73167e-05
FAAP24	0.175481	-8.12178	-4.01143	57	9.74027e-05
CARD19	0.0469642	-8.12011	-4.00975	229	9.77792e-05
UBFD1	0.0486012	-8.11857	-4.00822	224	9.81253e-05
ENSSSCG00000040827	0.0310105	-8.11527	-4.00491	354	9.88749e-05
ENSSSCG00000008496	0.0265971	-8.11402	-4.00366	442	9.91598e-05
BTF3	0.0242452	-8.11052	-4.00016	1334	9.99628e-05
RIDA	0.0298713	-8.09664	-3.98628	380	0.000103209
UBA1	0.0310193	-8.09323	-3.98288	353	0.000104021
DTD2	0.127089	-8.09038	-3.98002	73	0.000104708
MRPL35	0.0421812	-8.08623	-3.97587	246	0.000105713
HADHB	0.0233759	-8.06913	-3.95878	503	0.000109957
TIMM8A	0.0651298	-8.06018	-3.94983	185	0.000112246
ENSSSCG00000003914	0.0242162	-8.05746	-3.9471	1334	0.000112952
ADGRE5	0.0427795	-8.03648	-3.92612	243	0.000118543
PFKP	0.0301663	-8.03191	-3.92155	371	0.000119798
NCK2	0.061852	-8.00107	-3.89072	191	0.000128613
CYB5A	0.0311315	-7.99755	-3.8872	347	0.000129659
ZNF395	0.111345	-7.99744	-3.88709	92	0.000129692
ARL2	0.0304424	-7.99257	-3.88221	363	0.000131156
ST6GALNAC4	0.0204614	-7.98368	-3.87333	665	0.000133867
TNFSF10	0.0401843	-7.98337	-3.87302	254	0.000133963
DUSP11	0.0298348	-7.98151	-3.87116	377	0.000134537
ENSSSCG00000004446	0.0225563	-7.97966	-3.86931	1171	0.000135112
NAA38	0.0319748	-7.97905	-3.8687	329	0.000135302
MPV17L2	0.0456115	-7.97371	-3.86336	232	0.000136975
DAZAP2	0.020076	-7.96271	-3.85236	977	0.000140489
TXNL1	0.0206617	-7.96131	-3.85096	618	0.000140942
PIGX	0.0579235	-7.95918	-3.84882	199	0.000141637
ENSSSCG00000011290	0.0204784	-7.95044	-3.84009	653	0.000144516
PVRIG	0.022453	-7.94655	-3.8362	1166	0.000145814
NKX3-1	0.104549	-7.94527	-3.83492	111	0.000146246
S100A6	0.0467342	-7.93855	-3.82819	228	0.000148528
TPM3	0.0241492	-7.93574	-3.82539	1334	0.000149491
USP15	0.0197561	-7.9335	-3.82315	900	0.000150264
POLE2	1.85052	-7.92951	-3.81916	19	0.000151649
SUPT4H1	0.0230614	-7.92835	-3.818	1203	0.000152056
DNPH1	0.271734	-7.92689	-3.81654	45	0.000152567
ENSSSCG00000027790	0.0473135	-7.91878	-3.80842	226	0.000155444
CDC42SE1	0.0239792	-7.91812	-3.80776	487	0.000155682
SAMM50	0.0353084	-7.91359	-3.80324	285	0.000157312
RAD1	0.172162	-7.91238	-3.80203	57	0.000157751
RAB8A	0.0278001	-7.90767	-3.79732	416	0.000159471
LARP4	0.101988	-7.90149	-3.79113	116	0.000161759
ILF3	0.021134	-7.88632	-3.77596	573	0.000167508
CINP	0.0284336	-7.86533	-3.75498	403	0.000175802
HDGF	0.0282226	-7.8631	-3.75274	407	0.000176708
EIF1AX	0.0207121	-7.84526	-3.7349	603	0.000184119
ESYT2	0.0340171	-7.82199	-3.71163	296	0.000194252
SF3B3	0.0543364	-7.81709	-3.70673	206	0.000196457
MRPL3	0.0374994	-7.81588	-3.70553	267	0.000197004
DCXR	0.0437428	-7.81535	-3.70499	237	0.000197245
NCOR1	0.027997	-7.81266	-3.70231	410	0.00019847
ENSSSCG00000001097	0.0328663	-7.81183	-3.70147	310	0.000198851
CYGB	0.581662	-7.81116	-3.70081	32	0.000199155
CCDC69	0.0306162	-7.80737	-3.69702	352	0.000200902
NCOA7	0.02139	-7.781	-3.67064	556	0.000213481
AGFG2	0.119743	-7.77451	-3.66415	76	0.000216694
ENSSSCG00000035261	2.00108	-7.77247	-3.66212	18	0.000217713
UBTF	0.0323908	-7.7723	-3.66194	316	0.0002178
TMA7	0.0240521	-7.7604	-3.65005	1334	0.000223848
CD300C	0.267001	-7.76018	-3.64982	45	0.000223963
ENSSSCG00000011917	0.0353437	-7.75618	-3.64583	282	0.000226034
C12orf43	0.0894695	-7.75602	-3.64566	138	0.000226119
B9D2	0.122062	-7.75143	-3.64107	74	0.000228522
CDC25C	1.01114	-7.74638	-3.63603	25	0.000231191
NUDT1	0.0348679	-7.74408	-3.63373	286	0.00023242
CNPY3	0.0437888	-7.7341	-3.62374	236	0.000237824
IL21	0.206404	-7.72369	-3.61334	51	0.000243593
TBC1D10A	0.0918942	-7.71643	-3.60607	133	0.000247701
NAB2	0.164344	-7.71598	-3.60562	58	0.000247956
PPP1R3E	0.109771	-7.71318	-3.60282	89	0.000249561
TSPAN3	0.0313633	-7.7031	-3.59275	332	0.000255419
COX7B	0.0240169	-7.69717	-3.58681	1334	0.000258932
SUPT20H	0.0246102	-7.69606	-3.58571	470	0.000259594
BRD2	0.0197097	-7.6927	-3.58235	928	0.000261609
WRB	0.144967	-7.68771	-3.57735	63	0.000264636
FBXO33	0.0303388	-7.68352	-3.57316	354	0.0002672
P2RX7	0.173612	-7.68304	-3.57269	56	0.000267493
HNRNPR	0.020333	-7.67188	-3.56153	1025	0.000274457
TBCA	0.0240011	-7.66894	-3.55858	1334	0.000276322
CSF1	0.0814125	-7.65251	-3.54216	151	0.000286974
RUVBL2	0.0461775	-7.6524	-3.54205	227	0.000287048
USP11	0.0974846	-7.65168	-3.54133	121	0.000287521
SLC35C2	0.0513368	-7.64844	-3.53809	212	0.000289676
ENSSSCG00000007188	0.023982	-7.63478	-3.52442	1334	0.000298935
ENSSSCG00000030300	0.045206	-7.63262	-3.52227	230	0.000300422
TRIM44	0.107926	-7.63169	-3.52133	92	0.00030107
DOCK10	0.0322089	-7.62959	-3.51924	315	0.000302524
ENSSSCG00000007098	0.0311829	-7.62388	-3.51353	333	0.000306529
TPRKB	0.0889848	-7.62176	-3.5114	137	0.000308033
TSTD1	0.0806067	-7.61697	-3.50661	152	0.000311448
PUS7	0.113356	-7.61615	-3.50579	81	0.000312037
NDUFA11	0.0202833	-7.59293	-3.48258	645	0.000329173
RCAN2	0.111022	-7.58579	-3.47544	84	0.00033463
ENSSSCG00000036622	0.104793	-7.57717	-3.46682	101	0.000341338
SLC35A5	0.146623	-7.56769	-3.45734	62	0.000348869
GNA15	0.0303655	-7.56765	-3.45729	349	0.000348905
ENSSSCG00000002855	0.35799	-7.5672	-3.45684	39	0.000349266
HADH	0.0492179	-7.56546	-3.4551	217	0.000350669
SCG2	0.337815	-7.55746	-3.4471	40	0.000357189
HIRA	0.288004	-7.55709	-3.44674	43	0.000357488
RAD54L	1.17658	-7.55598	-3.44562	23	0.000358408
OXLD1	0.0773944	-7.55359	-3.44323	157	0.000360386
ENSSSCG00000000500	0.0553596	-7.54811	-3.43775	201	0.000364963
NSD3	0.0212218	-7.54443	-3.43407	1103	0.000368068
RAB5A	0.0202444	-7.54272	-3.43236	1022	0.000369519
GNAI2	0.0196399	-7.53954	-3.42918	823	0.000372234
HDAC1	0.0205346	-7.53552	-3.42516	600	0.000375697
ENSSSCG00000000657	0.0228906	-7.5197	-3.40934	1207	0.000389632
CHCHD3	0.023785	-7.51907	-3.40872	483	0.000390197
C12orf65	0.188249	-7.51736	-3.40701	53	0.000391735
CHIC2	0.0202909	-7.51692	-3.40657	632	0.000392131
MAP2K4	0.227097	-7.49124	-3.38088	48	0.000416023
ILK	0.019567	-7.48994	-3.37958	842	0.00041727
TP53RK	0.0341543	-7.48482	-3.37447	288	0.000422214
SWSAP1	0.28475	-7.4547	-3.34434	43	0.00045254
ASRGL1	0.10201	-7.45263	-3.34228	106	0.000454698
REEP5	0.0197267	-7.44988	-3.33952	784	0.000457592
MAP2K2	0.0212753	-7.44338	-3.33302	1110	0.000464491
MRPS26	0.0282879	-7.44128	-3.33093	394	0.000466739
CST3	0.021752	-7.4328	-3.32245	532	0.000475937
ENSSSCG00000007203	0.0249397	-7.42231	-3.31196	458	0.000487579
GPN3	0.0291223	-7.41651	-3.30615	374	0.000494138
ENSSSCG00000015664	0.106607	-7.41606	-3.3057	90	0.000494648
PDCL3	0.144539	-7.41066	-3.3003	62	0.000500836
MRPL52	0.0258666	-7.40056	-3.29021	440	0.000512618
EIF4G1	0.0436671	-7.40044	-3.29009	233	0.000512757
HUS1	0.0386043	-7.39944	-3.28909	255	0.000513938
STAT5A	0.0257492	-7.39147	-3.28111	442	0.000523466
TRMT1L	0.0371898	-7.38778	-3.27743	263	0.000527928
ENSSSCG00000033500	0.0238398	-7.38202	-3.27167	1334	0.000534976
PKM	0.0238374	-7.37768	-3.26733	1334	0.000540347
ID1	0.112674	-7.37626	-3.26591	79	0.000542115
FERMT3	0.0200138	-7.37389	-3.26354	694	0.000545086
ENDOD1	0.137971	-7.37175	-3.2614	64	0.000547775
RDH13	0.224211	-7.36868	-3.25832	48	0.000551667
DDX54	0.0303006	-7.36639	-3.25604	343	0.000554578
PMEPA1	0.154761	-7.35963	-3.24928	59	0.000563278
TBC1D1	0.0341054	-7.3528	-3.24245	286	0.000572203
ENSSSCG00000034990	0.392625	-7.34513	-3.23477	37	0.000582409
MMADHC	0.0204337	-7.34185	-3.23149	597	0.000586823
RPL27	0.0238165	-7.34094	-3.23059	1334	0.000588044
ST6GAL1	0.0711727	-7.33741	-3.22706	166	0.00059285
ZBED5	0.120606	-7.3357	-3.22535	72	0.000595181
ENSSSCG00000021200	0.154406	-7.33525	-3.22489	59	0.000595807
HSDL2	0.0835188	-7.32813	-3.21778	143	0.000605647
ND4L	0.0212067	-7.32313	-3.21277	549	0.000612669
NUP37	0.0964142	-7.31541	-3.20506	117	0.000623654
PDCD4	0.0201896	-7.31251	-3.20215	626	0.000627836
RGS16	0.059159	-7.3103	-3.19995	190	0.000631031
STT3A	0.0539524	-7.30263	-3.19227	202	0.000642285
ISG15	0.023793	-7.29956	-3.1892	1334	0.000646837
NSMCE2	0.0608841	-7.28477	-3.17442	186	0.000669242
CHAF1A	0.149577	-7.2684	-3.15804	60	0.000694952
NDUFA10	0.0290581	-7.26778	-3.15742	370	0.000695945
PARP9	0.0558728	-7.26383	-3.15347	197	0.000702308
CPNE3	0.0311321	-7.24806	-3.1377	322	0.000728278
ZC3H15	0.0194316	-7.24638	-3.13603	902	0.000731093
TRIM8	0.088148	-7.24422	-3.13386	133	0.000734746
PDIA6	0.0203483	-7.23181	-3.12145	598	0.000756045
RBM28	0.105974	-7.21748	-3.10712	87	0.000781404
LYRM7	0.0688973	-7.21566	-3.1053	169	0.000784687
MAT2B	0.0281458	-7.2135	-3.10314	390	0.000788602
ENSSSCG00000030197	0.107455	-7.211	-3.10064	84	0.000793152
ENSSSCG00000007688	0.0196089	-7.20858	-3.09822	957	0.000797586
ENSSSCG00000017336	0.029712	-7.20747	-3.09712	351	0.000799616
DDX18	0.0200214	-7.20331	-3.09296	649	0.000807319
SLC5A10	0.028169	-7.19876	-3.08841	389	0.000815817
ENSSSCG00000010158	0.0234094	-7.19109	-3.08073	1261	0.000830363
TRIM59	0.10315	-7.18303	-3.07267	94	0.000845918
NDE1	0.0781222	-7.1732	-3.06285	151	0.000865265
RCC1	0.384035	-7.1669	-3.05655	37	0.000877909
ENSSSCG00000020870	0.0234766	-7.16047	-3.05012	482	0.00089101
ARL6IP1	0.0235448	-7.15717	-3.04681	1278	0.000897815
G3BP1	0.0199591	-7.15487	-3.04452	660	0.000902576
PPP1R12A	0.0213278	-7.15407	-3.04372	539	0.000904242
TRAF1	0.0351844	-7.1325	-3.02215	273	0.000950286
MNDA	0.0610126	-7.11894	-3.00859	184	0.000980425
ENTPD1	0.0871256	-7.11474	-3.00439	133	0.000989949
NFKBID	0.101346	-7.108	-2.99764	98	0.00100544
SCARB1	1.20062	-7.10648	-2.99612	22	0.00100897
HYOU1	0.0347332	-7.09864	-2.98828	276	0.00102735
SSBP1	0.033298	-7.09344	-2.98309	289	0.00103972
ND3	0.0236746	-7.09226	-2.98191	1334	0.00104254
ENSSSCG00000013878	0.0193828	-7.08554	-2.97519	831	0.00105879
MAP2K3	0.0198389	-7.08432	-2.97396	693	0.00106179
RAB18	0.0238217	-7.0816	-2.97125	473	0.00106845
ENSSSCG00000032984	0.106182	-7.07675	-2.96639	84	0.00108045
TOB2	0.0312455	-7.07584	-2.96549	315	0.00108271
RNF139	0.037303	-7.07386	-2.96351	258	0.00108765
SSBP4	0.0323715	-7.07301	-2.96265	299	0.0010898
RSL24D1	0.019856	-7.07079	-2.96044	682	0.00109537
WDR77	0.0579751	-7.05266	-2.94231	190	0.00114207
NCBP2	0.0198057	-7.0469	-2.93655	697	0.00115732
SFXN1	0.0964859	-7.04266	-2.93231	111	0.00116867
ENSSSCG00000033272	0.021055	-7.04024	-2.92989	1109	0.00117519
MARCKS	0.246706	-7.03356	-2.92321	45	0.00119341
ABTB2	0.101758	-7.0321	-2.92175	94	0.00119744
NUDCD2	0.029792	-7.0258	-2.91544	342	0.00121495
ZBTB32	0.0970721	-7.02407	-2.91372	109	0.00121978
RNF34	0.0906905	-7.01502	-2.90466	124	0.00124548
RDX	0.0197166	-7.01271	-2.90236	720	0.00125212
GNL1	0.037159	-7.01202	-2.90167	258	0.0012541
ENSSSCG00000000148	0.0990115	-7.01195	-2.9016	103	0.0012543
TIMELESS	1.29701	-7.00411	-2.89376	21	0.00127714
PDIA4	0.0221043	-7.00105	-2.89069	511	0.00128619
RILPL2	0.022653	-6.99458	-2.88423	497	0.00130548
ENSSSCG00000027905	0.0301773	-6.98739	-2.87703	332	0.0013273
PTP4A1	0.019313	-6.98053	-2.87018	838	0.0013484
ENSSSCG00000032297	0.106505	-6.98004	-2.86968	82	0.00134995
CDCA2	1.57032	-6.97742	-2.86707	19	0.0013581
DIPK1A	0.103643	-6.96846	-2.85811	87	0.00138641
RRP1B	0.0287468	-6.9631	-2.85274	366	0.00140365
ENSSSCG00000012757	0.0199809	-6.96271	-2.85236	622	0.00140489
ENSSSCG00000023158	0.0225149	-6.95704	-2.84669	1204	0.00142336
ENSSSCG00000026217	0.0981644	-6.95357	-2.84322	104	0.00143477
KRAS	0.0209835	-6.94276	-2.83241	546	0.00147092
AHI1	0.0201885	-6.9413	-2.83095	594	0.00147588
WDR61	0.0199485	-6.93085	-2.82049	624	0.00151184
MFNG	0.0403227	-6.92589	-2.81554	241	0.00152919
ENSSSCG00000013315	0.0221829	-6.92572	-2.81537	1184	0.00152979
DPYSL2	0.0975585	-6.92263	-2.81228	105	0.00154072
ENSSSCG00000039706	0.0805273	-6.91941	-2.80906	143	0.00155218
GET4	0.117703	-6.91797	-2.80762	71	0.00155733
CRYBG1	0.183428	-6.9149	-2.80454	52	0.00156841
CYB561D2	0.0389718	-6.90971	-2.79936	247	0.00158724
ST6GALNAC2	0.0864726	-6.90724	-2.79688	131	0.00159631
IDH3A	0.0404884	-6.90122	-2.79086	240	0.00161858
EMC6	0.0192349	-6.89579	-2.78543	866	0.00163896
HSF4	0.109753	-6.88937	-2.77902	77	0.00166335
UBE2G1	0.0199201	-6.88834	-2.77798	624	0.00166731
PSENEN	0.0198573	-6.88473	-2.77437	637	0.00168123
DNAJC18	0.10066	-6.88089	-2.77053	93	0.00169616
TNFAIP8L1	0.170873	-6.88061	-2.77026	54	0.00169724
ENSSSCG00000013411	0.348755	-6.87365	-2.76329	38	0.00172467
ENSSSCG00000037142	0.0235403	-6.86003	-2.74967	1334	0.00177962
CXCL14	0.0985092	-6.85834	-2.74799	100	0.00178653
GRK5	0.106779	-6.85753	-2.74718	80	0.00178988
FLI1	0.0278798	-6.85528	-2.74492	384	0.00179918
VCP	0.0250066	-6.85368	-2.74332	444	0.00180583
PPA1	0.124349	-6.85137	-2.74102	67	0.00181544
GZMK	0.0643645	-6.85074	-2.74039	174	0.00181808
EDEM3	0.102934	-6.84332	-2.73297	86	0.00184942
TM2D3	0.0345682	-6.84057	-2.73021	273	0.00186118
MRPL4	0.0428383	-6.83611	-2.72576	230	0.00188038
SF1	0.0473849	-6.83383	-2.72348	215	0.00189025
DDOST	0.0192598	-6.83355	-2.72319	915	0.00189151
PDE3B	0.0778291	-6.8298	-2.71945	147	0.00190788
UCK2	0.27876	-6.82875	-2.71839	42	0.00191252
BCL6	0.0323015	-6.81277	-2.70241	294	0.0019842
COQ5	0.0811904	-6.80231	-2.69196	140	0.00203256
HDDC2	0.0392927	-6.78927	-2.67892	244	0.00209452
SHOC2	0.0298404	-6.78601	-2.67566	332	0.00211029
ENSSSCG00000038989	0.0208808	-6.78206	-2.6717	545	0.0021296
MTBP	0.949372	-6.78045	-2.6701	24	0.00213748
WASHC3	0.0242243	-6.78028	-2.66993	458	0.00213831
LSM8	0.0193553	-6.77367	-2.66331	783	0.00217114
RWDD4	0.0639384	-6.77259	-2.66224	174	0.00217652
RFC2	0.0196818	-6.76816	-2.6578	674	0.00219885
ALYREF	0.06156	-6.76677	-2.65642	179	0.00220587
CDCA7L	0.0474836	-6.76647	-2.65612	214	0.0022074
TSR3	0.0254011	-6.7644	-2.65404	434	0.00221798
TGFBR2	0.0317933	-6.76187	-2.65152	299	0.0022309
NDFIP1	0.0234825	-6.7609	-2.65055	1334	0.0022359
ENSSSCG00000034072	0.0231717	-6.75788	-2.64752	1264	0.00225152
GORASP2	0.0299569	-6.7418	-2.63145	328	0.00233642
TAPBP	0.0199758	-6.73291	-2.62256	601	0.00238474
RAB10	0.023406	-6.7295	-2.61914	474	0.00240356
ENSSSCG00000040248	0.0261482	-6.728	-2.61765	418	0.00241188
ARHGAP11A	0.218151	-6.72539	-2.61504	47	0.00242638
ALG14	0.385287	-6.71364	-2.60329	36	0.00249293
RAB2A	0.0193203	-6.71088	-2.60053	947	0.00250884
ENSSSCG00000035273	0.122713	-6.71003	-2.59968	67	0.00251375
LYRM1	0.0347915	-6.70083	-2.59048	269	0.00256757
ENSSSCG00000037869	0.0195754	-6.69986	-2.58951	703	0.0025733
CLEC2B	0.0424163	-6.6947	-2.58435	230	0.00260407
MIEN1	0.0206094	-6.69105	-2.58069	1090	0.00262606
PYM1	0.0994993	-6.68681	-2.57645	91	0.00265183
PARP2	0.062051	-6.68355	-2.5732	177	0.00267179
PPIG	0.0196507	-6.68108	-2.57073	662	0.00268701
FEZ2	0.0529809	-6.67654	-2.56618	198	0.00271529
C1orf122	0.0949222	-6.66633	-2.55597	106	0.00277987
CH25H	0.172587	-6.65889	-2.54854	53	0.0028279
SAP18	0.023422	-6.65768	-2.54733	1334	0.00283576
ARHGAP1	0.0930039	-6.64882	-2.53847	111	0.00289423
SLC30A5	0.0345433	-6.64773	-2.53737	270	0.00290153
KRR1	0.0237841	-6.64495	-2.53459	464	0.00292016
ENSSSCG00000000697	0.0194794	-6.64209	-2.53173	724	0.00293947
RANBP2	0.0352048	-6.63565	-2.5253	265	0.00298335
MASTL	0.286601	-6.62971	-2.51936	41	0.00302441
MYL9	0.172042	-6.62866	-2.51831	53	0.00303172
RBBP7	0.029861	-6.62747	-2.51711	326	0.0030401
EIF2B4	0.0547657	-6.62466	-2.51431	193	0.0030598
USP18	0.024628	-6.61973	-2.50937	446	0.00309477
PSMD13	0.0194224	-6.6169	-2.50654	737	0.003115
CCDC50	0.019416	-6.61171	-2.50136	738	0.0031524
SAP130	0.100308	-6.61089	-2.50054	87	0.00315837
BNIP3	0.0200195	-6.61002	-2.49966	588	0.00316474
ENSSSCG00000027746	0.0210812	-6.60558	-2.49522	1126	0.00319726
ENSSSCG00000010203	0.0233906	-6.60427	-2.49392	1334	0.00320687
RIN3	0.05077	-6.60417	-2.49382	203	0.0032076
RAB11B	0.0220387	-6.59532	-2.48496	503	0.00327367
CUTA	0.019094	-6.59214	-2.48179	893	0.0032977
ENSSSCG00000022773	0.100562	-6.58967	-2.47932	86	0.00331652
UGP2	0.0305063	-6.58739	-2.47703	313	0.003334
CRELD2	0.0471614	-6.58151	-2.47115	213	0.00337945
MRPL38	0.0270954	-6.57815	-2.4678	393	0.00340568
TFDP1	0.033648	-6.57678	-2.46642	276	0.00341647
PKMYT1	0.917566	-6.57407	-2.46371	24	0.00343785
ASAP1	0.0356546	-6.57147	-2.46112	261	0.00345847
PAK1IP1	0.0359503	-6.56392	-2.45357	259	0.00351911
CD86	0.0296057	-6.56337	-2.45301	329	0.0035236
PRPF19	0.0265312	-6.55661	-2.44626	405	0.00357885
SLC25A14	0.283995	-6.55522	-2.44487	41	0.00359033
UCP2	0.0191716	-6.55513	-2.44477	930	0.0035911
PRKACB	0.0198685	-6.5542	-2.44384	599	0.0035988
ENSSSCG00000032340	0.10115	-6.54389	-2.43353	84	0.00368524
TGIF2	0.0631078	-6.53491	-2.42456	173	0.00376218
YIPF6	0.115122	-6.53003	-2.41968	70	0.00380473
ZC3H12A	0.0493711	-6.52623	-2.41588	206	0.00383816
MGA	0.109398	-6.52563	-2.41527	74	0.0038435
MED4	0.0199473	-6.52478	-2.41442	589	0.00385102
PFDN4	0.0195489	-6.51782	-2.40747	660	0.00391321
MARS	0.065792	-6.50951	-2.39915	167	0.00398883
NDUFA13	0.0233295	-6.50105	-2.39069	1334	0.0040673
PRKCSH	0.0196394	-6.50067	-2.39032	628	0.00407082
ENSSSCG00000022246	0.104912	-6.49462	-2.38427	78	0.00412794
ENSSSCG00000006559	0.0203602	-6.49313	-2.38277	559	0.00414215
PRR7	0.0377108	-6.49215	-2.3818	248	0.00415147
HMGXB4	0.0268659	-6.47909	-2.36874	395	0.00427823
CDC6	0.702599	-6.47006	-2.35971	27	0.00436807
PPP2CA	0.0193967	-6.4615	-2.35115	981	0.00445506
ENSSSCG00000002790	0.0198592	-6.46045	-2.35009	593	0.00446589
ENSSSCG00000034802	0.108685	-6.45596	-2.3456	74	0.00451231
BAG2	0.174701	-6.45287	-2.34251	52	0.0045445
ENSSSCG00000030578	0.0291304	-6.44331	-2.33296	335	0.00464561
POLE	2.14951	-6.43392	-2.32357	15	0.00474715
ENSSSCG00000031526	0.241178	-6.43306	-2.3227	44	0.00475659
TBC1D10B	0.106027	-6.41383	-2.30348	76	0.00497193
HIBCH	0.0994016	-6.41356	-2.30321	85	0.00497501
KSR2	0.117311	-6.41053	-2.30018	68	0.00500982
WDR12	0.0408025	-6.41045	-2.30009	233	0.00501081
MPC2	0.0193672	-6.40831	-2.29796	713	0.00503546
SLAMF7	0.0983606	-6.40138	-2.29103	87	0.00511649
POLQ	2.13483	-6.40022	-2.28987	15	0.00513017
TNFSF9	0.0777014	-6.39833	-2.28798	141	0.00515255
KNTC1	3.35908	-6.3982	-2.28784	11	0.00515414
PPIH	0.0263419	-6.38956	-2.27921	404	0.00525766
TSPAN5	0.0191509	-6.38715	-2.27679	778	0.00528697
ARV1	0.0939257	-6.38439	-2.27404	101	0.0053206
FGL2	0.0569789	-6.38273	-2.27238	185	0.00534097
TPST1	0.101379	-6.37276	-2.26241	81	0.00546502
CDKN1B	0.0266075	-6.35993	-2.24958	397	0.00562887
PTGER2	0.0607191	-6.34662	-2.23627	176	0.00580409
EGLN3	0.0828981	-6.34267	-2.23232	129	0.0058571
APIP	0.0894363	-6.32687	-2.21652	113	0.00607414
STAT2	0.0360371	-6.32491	-2.21456	255	0.00610154
SLA-DMA	0.0281115	-6.32394	-2.21359	356	0.0061152
ISCU	0.0216212	-6.31529	-2.20494	1171	0.00623824
RNF219	0.100122	-6.31026	-2.19991	82	0.00631093
LYPLAL1	0.130063	-6.30767	-2.19731	62	0.00634874
CEP290	0.0760051	-6.29769	-2.18733	143	0.00649631
PSIP1	0.0228865	-6.29251	-2.18216	1265	0.00657418
PIK3IP1	0.0467722	-6.29062	-2.18026	211	0.00660292
HAUS1	0.0487951	-6.28628	-2.17593	205	0.00666915
ENSSSCG00000035538	0.0189928	-6.28525	-2.1749	917	0.00668497
ENSSSCG00000033550	2.08465	-6.28396	-2.17361	15	0.00670486
RAB21	0.0201956	-6.28025	-2.1699	559	0.00676238
ADAT2	0.0904075	-6.27354	-2.16319	109	0.00686774
RND3	0.288934	-6.27119	-2.16084	40	0.00690494
HYLS1	0.165602	-6.27026	-2.1599	53	0.00691988
SUN2	0.0240656	-6.26903	-2.15868	449	0.00693942
PLSCR3	0.0300461	-6.26272	-2.15236	311	0.00704106
NCAPH2	0.0817906	-6.26053	-2.15017	130	0.00707665
HSPB11	0.0938051	-6.25215	-2.1418	97	0.00721438
NSMAF	0.0393815	-6.24752	-2.13717	237	0.00729176
ENSSSCG00000011064	0.0983561	-6.24671	-2.13635	84	0.00730547
HMBS	0.1386	-6.23607	-2.12571	59	0.00748663
LSP1	0.0231707	-6.23554	-2.12518	1334	0.00749578
[truncated: 229 more rows]

## Sheet: GO_results
DGE_analysis	cluster.topic.module	GO.ID	Term	Annotated	Significant	Expected	pval
cluster	15	GO:0051607	defense response to virus	122	6	0.92	0.0003
cluster	15	GO:0009617	response to bacterium	246	8	1.85	0.00049
cluster	15	GO:0032020	ISG15-protein conjugation	5	2	0.04	0.00055
cluster	15	GO:0050777	negative regulation of immune response	90	5	0.68	0.00056
cluster	15	GO:0032754	positive regulation of interleukin-5 production	6	2	0.05	0.00082
cluster	15	GO:0009214	cyclic nucleotide catabolic process	6	2	0.05	0.00082
cluster	15	GO:0001911	negative regulation of leukocyte mediated cytotoxicity	7	2	0.05	0.00115
cluster	15	GO:1903978	regulation of microglial cell activation	7	2	0.05	0.00115
cluster	15	GO:0042113	B cell activation	162	6	1.22	0.00133
cluster	15	GO:0140289	protein mono-ADP-ribosylation	8	2	0.06	0.00152
cluster	15	GO:0001836	release of cytochrome c from mitochondria	31	3	0.23	0.00158
cluster	15	GO:0034755	iron ion transmembrane transport	9	2	0.07	0.00194
cluster	15	GO:0070213	protein auto-ADP-ribosylation	10	2	0.08	0.00242
cluster	15	GO:0050728	negative regulation of inflammatory response	78	4	0.59	0.00276
cluster	15	GO:2000117	negative regulation of cysteine-type endopeptidase activity	38	3	0.29	0.00286
cluster	15	GO:0032663	regulation of interleukin-2 production	38	3	0.29	0.00286
cluster	15	GO:0046058	cAMP metabolic process	11	2	0.08	0.00294
cluster	15	GO:0043032	positive regulation of macrophage activation	11	2	0.08	0.00294
cluster	15	GO:0043951	negative regulation of cAMP-mediated signaling	12	2	0.09	0.00351
cluster	15	GO:0072678	T cell migration	41	3	0.31	0.00355
cluster	15	GO:0019369	arachidonic acid metabolic process	14	2	0.11	0.0048
cluster	15	GO:0043281	regulation of cysteine-type endopeptidase activity involved in apoptotic process	97	4	0.73	0.00604
cluster	15	GO:0002683	negative regulation of immune system process	256	10	1.93	0.00617
cluster	15	GO:0043367	CD4-positive, alpha-beta T cell differentiation	50	3	0.38	0.00622
cluster	15	GO:0042542	response to hydrogen peroxide	50	3	0.38	0.00622
cluster	15	GO:0050851	antigen receptor-mediated signaling pathway	98	4	0.74	0.00626
cluster	15	GO:0001776	leukocyte homeostasis	51	3	0.38	0.00658
cluster	15	GO:0031641	regulation of myelination	17	2	0.13	0.00707
cluster	15	GO:1902042	negative regulation of extrinsic apoptotic signaling pathway via death domain receptors	17	2	0.13	0.00707
cluster	15	GO:0002822	regulation of adaptive immune response based on somatic recombination of immune receptors built from immunoglobulin superfamily domains	103	4	0.78	0.00745
cluster	15	GO:0097530	granulocyte migration	54	3	0.41	0.00771
cluster	15	GO:0001913	T cell mediated cytotoxicity	20	2	0.15	0.00973
cluster	15	GO:0002691	regulation of cellular extravasation	20	2	0.15	0.00973
cluster	15	GO:0009154	purine ribonucleotide catabolic process	20	2	0.15	0.00973
cluster	15	GO:0001819	positive regulation of cytokine production	268	8	2.02	0.01204
cluster	15	GO:0002707	negative regulation of lymphocyte mediated immunity	23	2	0.17	0.01277
cluster	15	GO:0002335	mature B cell differentiation	23	2	0.17	0.01277
cluster	15	GO:0032743	positive regulation of interleukin-2 production	23	2	0.17	0.01277
cluster	15	GO:0050729	positive regulation of inflammatory response	66	3	0.5	0.01334
cluster	15	GO:0050852	T cell receptor signaling pathway	66	3	0.5	0.01334
cluster	15	GO:0007186	G protein-coupled receptor signaling pathway	262	6	1.97	0.01375
cluster	15	GO:0032649	regulation of interferon-gamma production	67	3	0.5	0.01389
cluster	15	GO:0032609	interferon-gamma production	68	3	0.51	0.01445
cluster	15	GO:0002823	negative regulation of adaptive immune response based on somatic recombination of immune receptors built from immunoglobulin superfamily domains	28	2	0.21	0.01862
cluster	15	GO:0031644	regulation of nervous system process	29	2	0.22	0.01991
cluster	15	GO:0030183	B cell differentiation	77	3	0.58	0.02011
cluster	15	GO:0002820	negative regulation of adaptive immune response	30	2	0.23	0.02123
cluster	15	GO:0001818	negative regulation of cytokine production	142	4	1.07	0.022
cluster	15	GO:0045824	negative regulation of innate immune response	31	2	0.23	0.02258
cluster	15	GO:0032680	regulation of tumor necrosis factor production	82	3	0.62	0.02371
cluster	15	GO:0032640	tumor necrosis factor production	82	3	0.62	0.02371
cluster	15	GO:0044403	symbiotic process	220	5	1.66	0.02475
cluster	15	GO:0006935	chemotaxis	224	5	1.69	0.02649
cluster	15	GO:1903555	regulation of tumor necrosis factor superfamily cytokine production	86	3	0.65	0.02683
cluster	15	GO:0071706	tumor necrosis factor superfamily cytokine production	86	3	0.65	0.02683
cluster	15	GO:0042330	taxis	225	5	1.69	0.02694
cluster	15	GO:0043154	negative regulation of cysteine-type endopeptidase activity involved in apoptotic process	35	2	0.26	0.02835
cluster	15	GO:1903362	regulation of cellular protein catabolic process	157	4	1.18	0.03037
cluster	15	GO:0051240	positive regulation of multicellular organismal process	818	13	6.16	0.03249
cluster	15	GO:0006919	activation of cysteine-type endopeptidase activity involved in apoptotic process	39	2	0.29	0.03463
cluster	15	GO:0000079	regulation of cyclin-dependent protein serine/threonine kinase activity	40	2	0.3	0.03628
cluster	15	GO:0008585	female gonad development	40	2	0.3	0.03628
cluster	15	GO:0042093	T-helper cell differentiation	40	2	0.3	0.03628
cluster	15	GO:0030098	lymphocyte differentiation	223	7	1.68	0.0364
cluster	15	GO:0150079	negative regulation of neuroinflammatory response	5	1	0.04	0.0371
cluster	15	GO:0002716	negative regulation of natural killer cell mediated immunity	5	1	0.04	0.0371
cluster	15	GO:2000391	positive regulation of neutrophil extravasation	5	1	0.04	0.0371
cluster	15	GO:1905323	telomerase holoenzyme complex assembly	5	1	0.04	0.0371
cluster	15	GO:1902525	regulation of protein monoubiquitination	5	1	0.04	0.0371
cluster	15	GO:2000345	regulation of hepatocyte proliferation	5	1	0.04	0.0371
cluster	15	GO:2000348	regulation of CD40 signaling pathway	5	1	0.04	0.0371
cluster	15	GO:0106072	negative regulation of adenylate cyclase-activating G protein-coupled receptor signaling pathway	5	1	0.04	0.0371
cluster	15	GO:0055119	relaxation of cardiac muscle	5	1	0.04	0.0371
cluster	15	GO:0032911	negative regulation of transforming growth factor beta1 production	5	1	0.04	0.0371
cluster	15	GO:0043615	astrocyte cell migration	5	1	0.04	0.0371
cluster	15	GO:0086103	G protein-coupled receptor signaling pathway involved in heart process	5	1	0.04	0.0371
cluster	15	GO:0052040	modulation by symbiont of host programmed cell death	5	1	0.04	0.0371
cluster	15	GO:0034165	positive regulation of toll-like receptor 9 signaling pathway	5	1	0.04	0.0371
cluster	15	GO:0034155	regulation of toll-like receptor 7 signaling pathway	5	1	0.04	0.0371
cluster	15	GO:0034157	positive regulation of toll-like receptor 7 signaling pathway	5	1	0.04	0.0371
cluster	15	GO:0072677	eosinophil migration	5	1	0.04	0.0371
cluster	15	GO:0051881	regulation of mitochondrial membrane potential	41	2	0.31	0.03796
cluster	15	GO:1990266	neutrophil migration	41	2	0.31	0.03796
cluster	15	GO:0046545	development of primary female sexual characteristics	41	2	0.31	0.03796
cluster	15	GO:0070301	cellular response to hydrogen peroxide	41	2	0.31	0.03796
cluster	15	GO:0002294	CD4-positive, alpha-beta T cell differentiation involved in immune response	41	2	0.31	0.03796
cluster	15	GO:0002695	negative regulation of leukocyte activation	100	3	0.75	0.03938
cluster	15	GO:0002293	alpha-beta T cell differentiation involved in immune response	42	2	0.32	0.03967
cluster	15	GO:0002287	alpha-beta T cell activation involved in immune response	42	2	0.32	0.03967
cluster	15	GO:0048232	male gamete generation	172	4	1.3	0.0404
cluster	15	GO:1904029	regulation of cyclin-dependent protein kinase activity	43	2	0.32	0.0414
cluster	15	GO:0002706	regulation of lymphocyte mediated immunity	103	3	0.78	0.04239
cluster	15	GO:0051249	regulation of lymphocyte activation	255	5	1.92	0.04269
cluster	15	GO:0046660	female sex differentiation	44	2	0.33	0.04317
cluster	15	GO:0045638	negative regulation of myeloid cell differentiation	44	2	0.33	0.04317
cluster	15	GO:0021854	hypothalamus development	6	1	0.05	0.04436
cluster	15	GO:0033212	iron import into cell	6	1	0.05	0.04436
cluster	15	GO:0031665	negative regulation of lipopolysaccharide-mediated signaling pathway	6	1	0.05	0.04436
cluster	15	GO:0031642	negative regulation of myelination	6	1	0.05	0.04436
cluster	15	GO:0042744	hydrogen peroxide catabolic process	6	1	0.05	0.04436
cluster	15	GO:2000389	regulation of neutrophil extravasation	6	1	0.05	0.04436
cluster	15	GO:0016486	peptide hormone processing	6	1	0.05	0.04436
cluster	15	GO:0000491	small nucleolar ribonucleoprotein complex assembly	6	1	0.05	0.04436
cluster	15	GO:0002357	defense response to tumor cell	6	1	0.05	0.04436
cluster	15	GO:1901388	regulation of transforming growth factor beta activation	6	1	0.05	0.04436
cluster	15	GO:0009650	UV protection	6	1	0.05	0.04436
cluster	15	GO:0106070	regulation of adenylate cyclase-activating G protein-coupled receptor signaling pathway	6	1	0.05	0.04436
cluster	15	GO:0070427	nucleotide-binding oligomerization domain containing 1 signaling pathway	6	1	0.05	0.04436
cluster	15	GO:0070432	regulation of nucleotide-binding oligomerization domain containing 2 signaling pathway	6	1	0.05	0.04436
cluster	15	GO:0002692	negative regulation of cellular extravasation	6	1	0.05	0.04436
cluster	15	GO:0002676	regulation of chronic inflammatory response	6	1	0.05	0.04436
cluster	15	GO:0001553	luteinization	6	1	0.05	0.04436
cluster	15	GO:0002634	regulation of germinal center formation	6	1	0.05	0.04436
cluster	15	GO:0043031	negative regulation of macrophage activation	6	1	0.05	0.04436
cluster	15	GO:0002292	T cell differentiation involved in immune response	45	2	0.34	0.04496
cluster	15	GO:0052548	regulation of endopeptidase activity	149	7	1.12	0.0467
cluster	15	GO:0044264	cellular polysaccharide metabolic process	46	2	0.35	0.04678
cluster	15	GO:0050866	negative regulation of cell activation	108	3	0.81	0.04767
cluster	15	GO:0008584	male gonad development	47	2	0.35	0.04863
cluster	41	GO:0051043	regulation of membrane protein ectodomain proteolysis	13	3	0.1	0.0001
cluster	41	GO:0032689	negative regulation of interferon-gamma production	17	3	0.12	0.00024
cluster	41	GO:0002313	mature B cell differentiation involved in immune response	18	3	0.13	0.00028
cluster	41	GO:0045589	regulation of regulatory T cell differentiation	19	3	0.14	0.00033
cluster	41	GO:2000109	regulation of macrophage apoptotic process	5	2	0.04	0.00052
cluster	41	GO:0002676	regulation of chronic inflammatory response	6	2	0.04	0.00078
cluster	41	GO:0033033	negative regulation of myeloid cell apoptotic process	6	2	0.04	0.00078
cluster	41	GO:0002725	negative regulation of T cell cytokine production	6	2	0.04	0.00078
cluster	41	GO:0032715	negative regulation of interleukin-6 production	26	3	0.19	0.00086
cluster	41	GO:0002862	negative regulation of inflammatory response to antigenic stimulus	7	2	0.05	0.00108
cluster	41	GO:0045581	negative regulation of T cell differentiation	30	3	0.22	0.00132
cluster	41	GO:0032720	negative regulation of tumor necrosis factor production	30	3	0.22	0.00132
cluster	41	GO:0006983	ER overload response	8	2	0.06	0.00143
cluster	41	GO:0035729	cellular response to hepatocyte growth factor stimulus	9	2	0.07	0.00183
cluster	41	GO:0042832	defense response to protozoan	9	2	0.07	0.00183
cluster	41	GO:0051607	defense response to virus	122	5	0.89	0.00193
cluster	41	GO:0031398	positive regulation of protein ubiquitination	74	4	0.54	0.00205
cluster	41	GO:0002407	dendritic cell chemotaxis	11	2	0.08	0.00278
cluster	41	GO:0046637	regulation of alpha-beta T cell differentiation	39	3	0.29	0.00283
cluster	41	GO:0042129	regulation of T cell proliferation	95	6	0.69	0.00312
cluster	41	GO:1901215	negative regulation of neuron death	84	4	0.61	0.00325
cluster	41	GO:0051881	regulation of mitochondrial membrane potential	41	3	0.3	0.00327
cluster	41	GO:0006955	immune response	676	17	4.94	0.00329
cluster	41	GO:0030889	negative regulation of B cell proliferation	12	2	0.09	0.00332
cluster	41	GO:0150077	regulation of neuroinflammatory response	12	2	0.09	0.00332
cluster	41	GO:0032695	negative regulation of interleukin-12 production	12	2	0.09	0.00332
cluster	41	GO:0090026	positive regulation of monocyte chemotaxis	12	2	0.09	0.00332
cluster	41	GO:0051241	negative regulation of multicellular organismal process	546	14	3.99	0.00372
cluster	41	GO:0070227	lymphocyte apoptotic process	45	3	0.33	0.00426
cluster	41	GO:0032703	negative regulation of interleukin-2 production	14	2	0.1	0.00453
cluster	41	GO:0060713	labyrinthine layer morphogenesis	14	2	0.1	0.00453
cluster	41	GO:0001779	natural killer cell differentiation	14	2	0.1	0.00453
cluster	41	GO:1902236	negative regulation of endoplasmic reticulum stress-induced intrinsic apoptotic signaling pathway	15	2	0.11	0.0052
cluster	41	GO:0032729	positive regulation of interferon-gamma production	50	3	0.37	0.00573
cluster	41	GO:0001893	maternal placenta development	16	2	0.12	0.00592
cluster	41	GO:0060544	regulation of necroptotic process	16	2	0.12	0.00592
cluster	41	GO:0043065	positive regulation of apoptotic process	300	7	2.19	0.00609
cluster	41	GO:1902107	positive regulation of leukocyte differentiation	101	4	0.74	0.00627
cluster	41	GO:1902533	positive regulation of intracellular signal transduction	466	9	3.41	0.00651
cluster	41	GO:1902042	negative regulation of extrinsic apoptotic signaling pathway via death domain receptors	17	2	0.12	0.00667
cluster	41	GO:0031641	regulation of myelination	17	2	0.12	0.00667
cluster	41	GO:0042102	positive regulation of T cell proliferation	53	3	0.39	0.00675
cluster	41	GO:0050671	positive regulation of lymphocyte proliferation	72	5	0.53	0.00769
cluster	41	GO:1904019	epithelial cell apoptotic process	56	3	0.41	0.00786
cluster	41	GO:0045577	regulation of B cell differentiation	19	2	0.14	0.00831
cluster	41	GO:0030501	positive regulation of bone mineralization	19	2	0.14	0.00831
cluster	41	GO:0050871	positive regulation of B cell activation	58	3	0.42	0.00866
cluster	41	GO:0071674	mononuclear cell migration	32	4	0.23	0.00869
cluster	41	GO:0051603	proteolysis involved in cellular protein catabolic process	403	8	2.95	0.00878
cluster	41	GO:0051384	response to glucocorticoid	20	2	0.15	0.00919
cluster	41	GO:0071320	cellular response to cAMP	21	2	0.15	0.01011
cluster	41	GO:0042981	regulation of apoptotic process	720	18	5.27	0.01084
cluster	41	GO:0043067	regulation of programmed cell death	738	19	5.4	0.01115
cluster	41	GO:0045621	positive regulation of lymphocyte differentiation	64	3	0.47	0.01133
cluster	41	GO:0016032	viral process	186	5	1.36	0.01143
cluster	41	GO:0043122	regulation of I-kappaB kinase/NF-kappaB signaling	121	4	0.88	0.0117
cluster	41	GO:0001773	myeloid dendritic cell activation	23	2	0.17	0.01207
cluster	41	GO:0050779	RNA destabilization	23	2	0.17	0.01207
cluster	41	GO:0007165	signal transduction	2431	32	17.78	0.01258
cluster	41	GO:0051716	cellular response to stimulus	3279	42	23.98	0.01285
cluster	41	GO:0042110	T cell activation	274	12	2	0.01368
cluster	41	GO:0030890	positive regulation of B cell proliferation	25	2	0.18	0.01418
cluster	41	GO:0051591	response to cAMP	25	2	0.18	0.01418
cluster	41	GO:0051403	stress-activated MAPK cascade	130	4	0.95	0.0149
cluster	41	GO:0034142	toll-like receptor 4 signaling pathway	26	2	0.19	0.01529
cluster	41	GO:0046330	positive regulation of JNK cascade	73	3	0.53	0.01615
cluster	41	GO:0031098	stress-activated protein kinase signaling cascade	134	4	0.98	0.01649
cluster	41	GO:0030888	regulation of B cell proliferation	40	4	0.29	0.01668
cluster	41	GO:0002708	positive regulation of lymphocyte mediated immunity	75	3	0.55	0.01736
cluster	41	GO:0046638	positive regulation of alpha-beta T cell differentiation	28	2	0.2	0.01762
cluster	41	GO:0045071	negative regulation of viral genome replication	28	2	0.2	0.01762
cluster	41	GO:0031644	regulation of nervous system process	29	2	0.21	0.01884
cluster	41	GO:0097192	extrinsic apoptotic signaling pathway in absence of ligand	29	2	0.21	0.01884
cluster	41	GO:0038034	signal transduction in absence of ligand	29	2	0.21	0.01884
cluster	41	GO:0032653	regulation of interleukin-10 production	29	2	0.21	0.01884
cluster	41	GO:0003170	heart valve development	29	2	0.21	0.01884
cluster	41	GO:0032613	interleukin-10 production	29	2	0.21	0.01884
cluster	41	GO:0007249	I-kappaB kinase/NF-kappaB signaling	140	4	1.02	0.01906
cluster	41	GO:0070371	ERK1 and ERK2 cascade	140	4	1.02	0.01906
cluster	41	GO:2000107	negative regulation of leukocyte apoptotic process	30	2	0.22	0.02009
cluster	41	GO:0009617	response to bacterium	246	10	1.8	0.02015
cluster	41	GO:0002699	positive regulation of immune effector process	144	4	1.05	0.0209
cluster	41	GO:0001836	release of cytochrome c from mitochondria	31	2	0.23	0.02137
cluster	41	GO:0050672	negative regulation of lymphocyte proliferation	44	4	0.32	0.02149
cluster	41	GO:0044403	symbiotic process	220	5	1.61	0.02209
cluster	41	GO:0046677	response to antibiotic	83	3	0.61	0.02267
cluster	41	GO:0002711	positive regulation of T cell mediated immunity	32	2	0.23	0.02269
cluster	41	GO:0032945	negative regulation of mononuclear cell proliferation	45	4	0.33	0.02277
cluster	41	GO:0070374	positive regulation of ERK1 and ERK2 cascade	84	3	0.61	0.02339
cluster	41	GO:0043410	positive regulation of MAPK cascade	224	5	1.64	0.02367
cluster	41	GO:0070664	negative regulation of leukocyte proliferation	46	4	0.34	0.02409
cluster	41	GO:0050896	response to stimulus	3871	50	28.31	0.0263
cluster	41	GO:0032874	positive regulation of stress-activated MAPK cascade	88	3	0.64	0.02639
cluster	41	GO:0042130	negative regulation of T cell proliferation	35	2	0.26	0.02684
cluster	41	GO:0045646	regulation of erythrocyte differentiation	35	2	0.26	0.02684
cluster	41	GO:0070304	positive regulation of stress-activated protein kinase signaling cascade	90	3	0.66	0.02796
cluster	41	GO:0042742	defense response to bacterium	90	3	0.66	0.02796
cluster	41	GO:0007166	cell surface receptor signaling pathway	1162	16	8.5	0.02807
cluster	41	GO:0070228	regulation of lymphocyte apoptotic process	36	2	0.26	0.02829
cluster	41	GO:0043123	positive regulation of I-kappaB kinase/NF-kappaB signaling	91	3	0.67	0.02876
cluster	41	GO:0046328	regulation of JNK cascade	91	3	0.67	0.02876
cluster	41	GO:0006954	inflammatory response	283	10	2.07	0.0307
cluster	41	GO:0023052	signaling	2604	32	19.04	0.03087
cluster	41	GO:1901698	response to nitrogen compound	414	7	3.03	0.03087
cluster	41	GO:0044419	interspecies interaction between organisms	698	18	5.1	0.03089
cluster	41	GO:0071417	cellular response to organonitrogen compound	241	5	1.76	0.03115
cluster	41	GO:0002705	positive regulation of leukocyte mediated immunity	94	3	0.69	0.03125
cluster	41	GO:0014074	response to purine-containing compound	38	2	0.28	0.03127
cluster	41	GO:0046635	positive regulation of alpha-beta T cell activation	38	2	0.28	0.03127
cluster	41	GO:0030099	myeloid cell differentiation	242	5	1.77	0.03164
cluster	41	GO:0010941	regulation of cell death	794	19	5.81	0.03229
cluster	41	GO:0014013	regulation of gliogenesis	39	2	0.29	0.03281
cluster	41	GO:0001570	vasculogenesis	39	2	0.29	0.03281
cluster	41	GO:0046683	response to organophosphorus	39	2	0.29	0.03281
cluster	41	GO:0007254	JNK cascade	96	3	0.7	0.03298
cluster	41	GO:0002250	adaptive immune response	178	6	1.3	0.03356
cluster	41	GO:0008585	female gonad development	40	2	0.29	0.03438
cluster	41	GO:1903901	negative regulation of viral life cycle	40	2	0.29	0.03438
cluster	41	GO:0042093	T-helper cell differentiation	40	2	0.29	0.03438
cluster	41	GO:0098609	cell-cell adhesion	348	10	2.54	0.03562
cluster	41	GO:0042100	B cell proliferation	54	4	0.39	0.03566
cluster	41	GO:0070301	cellular response to hydrogen peroxide	41	2	0.3	0.03597
cluster	41	GO:0002294	CD4-positive, alpha-beta T cell differentiation involved in immune response	41	2	0.3	0.03597
cluster	41	GO:0046545	development of primary female sexual characteristics	41	2	0.3	0.03597
cluster	41	GO:0046929	negative regulation of neurotransmitter secretion	5	1	0.04	0.03604
cluster	41	GO:1901660	calcium ion export	5	1	0.04	0.03604
cluster	41	GO:0032020	ISG15-protein conjugation	5	1	0.04	0.03604
cluster	41	GO:0048382	mesendoderm development	5	1	0.04	0.03604
cluster	41	GO:0043615	astrocyte cell migration	5	1	0.04	0.03604
cluster	41	GO:0045348	positive regulation of MHC class II biosynthetic process	5	1	0.04	0.03604
cluster	41	GO:1902525	regulation of protein monoubiquitination	5	1	0.04	0.03604
cluster	41	GO:0150079	negative regulation of neuroinflammatory response	5	1	0.04	0.03604
cluster	41	GO:0002246	wound healing involved in inflammatory response	5	1	0.04	0.03604
cluster	41	GO:0002232	leukocyte chemotaxis involved in inflammatory response	5	1	0.04	0.03604
cluster	41	GO:0006590	thyroid hormone generation	5	1	0.04	0.03604
cluster	41	GO:2000554	regulation of T-helper 1 cell cytokine production	5	1	0.04	0.03604
cluster	41	GO:2000556	positive regulation of T-helper 1 cell cytokine production	5	1	0.04	0.03604
cluster	41	GO:0035744	T-helper 1 cell cytokine production	5	1	0.04	0.03604
cluster	41	GO:0034141	positive regulation of toll-like receptor 3 signaling pathway	5	1	0.04	0.03604
cluster	41	GO:0098696	regulation of neurotransmitter receptor localization to postsynaptic specialization membrane	5	1	0.04	0.03604
cluster	41	GO:0019054	modulation by virus of host cellular process	5	1	0.04	0.03604
cluster	41	GO:0071492	cellular response to UV-A	5	1	0.04	0.03604
cluster	41	GO:2000348	regulation of CD40 signaling pathway	5	1	0.04	0.03604
cluster	41	GO:0048714	positive regulation of oligodendrocyte differentiation	5	1	0.04	0.03604
cluster	41	GO:2001214	positive regulation of vasculogenesis	5	1	0.04	0.03604
cluster	41	GO:0002513	tolerance induction to self antigen	5	1	0.04	0.03604
cluster	41	GO:0035696	monocyte extravasation	5	1	0.04	0.03604
cluster	41	GO:2001028	positive regulation of endothelial cell chemotaxis	5	1	0.04	0.03604
cluster	41	GO:0045829	negative regulation of isotype switching	5	1	0.04	0.03604
cluster	41	GO:0052040	modulation by symbiont of host programmed cell death	5	1	0.04	0.03604
cluster	41	GO:0007154	cell communication	2642	32	19.32	0.03682
cluster	41	GO:0062197	cellular response to chemical stress	173	4	1.27	0.03752
cluster	41	GO:0002293	alpha-beta T cell differentiation involved in immune response	42	2	0.31	0.0376
cluster	41	GO:0002287	alpha-beta T cell activation involved in immune response	42	2	0.31	0.0376
cluster	41	GO:1901184	regulation of ERBB signaling pathway	42	2	0.31	0.0376
cluster	41	GO:0051028	mRNA transport	42	2	0.31	0.0376
cluster	41	GO:1904035	regulation of epithelial cell apoptotic process	42	2	0.31	0.0376
cluster	41	GO:2000106	regulation of leukocyte apoptotic process	50	4	0.37	0.04039
cluster	41	GO:0045638	negative regulation of myeloid cell differentiation	44	2	0.32	0.04093
cluster	41	GO:0046660	female sex differentiation	44	2	0.32	0.04093
cluster	41	GO:0071621	granulocyte chemotaxis	44	2	0.32	0.04093
cluster	41	GO:0002262	myeloid cell homeostasis	105	3	0.77	0.04132
cluster	41	GO:0007186	G protein-coupled receptor signaling pathway	262	5	1.92	0.04228
cluster	41	GO:0002292	T cell differentiation involved in immune response	45	2	0.33	0.04263
cluster	41	GO:0002664	regulation of T cell tolerance induction	6	1	0.04	0.04309
cluster	41	GO:0002314	germinal center B cell differentiation	6	1	0.04	0.04309
cluster	41	GO:0032071	regulation of endodeoxyribonuclease activity	6	1	0.04	0.04309
cluster	41	GO:0045657	positive regulation of monocyte differentiation	6	1	0.04	0.04309
cluster	41	GO:0070141	response to UV-A	6	1	0.04	0.04309
cluster	41	GO:0009155	purine deoxyribonucleotide catabolic process	6	1	0.04	0.04309
cluster	41	GO:0009158	ribonucleoside monophosphate catabolic process	6	1	0.04	0.04309
cluster	41	GO:0009159	deoxyribonucleoside monophosphate catabolic process	6	1	0.04	0.04309
cluster	41	GO:0031642	negative regulation of myelination	6	1	0.04	0.04309
cluster	41	GO:0033080	immature T cell proliferation in thymus	6	1	0.04	0.04309
cluster	41	GO:0033084	regulation of immature T cell proliferation in thymus	6	1	0.04	0.04309
cluster	41	GO:1902337	regulation of apoptotic process involved in morphogenesis	6	1	0.04	0.04309
cluster	41	GO:0006620	posttranslational protein targeting to endoplasmic reticulum membrane	6	1	0.04	0.04309
cluster	41	GO:0021854	hypothalamus development	6	1	0.04	0.04309
cluster	41	GO:0008298	intracellular mRNA localization	6	1	0.04	0.04309
cluster	41	GO:1904748	regulation of apoptotic process involved in development	6	1	0.04	0.04309
cluster	41	GO:2001212	regulation of vasculogenesis	6	1	0.04	0.04309
cluster	41	GO:0046130	purine ribonucleoside catabolic process	6	1	0.04	0.04309
cluster	41	GO:0002517	T cell tolerance induction	6	1	0.04	0.04309
cluster	41	GO:0051589	negative regulation of neurotransmitter transport	6	1	0.04	0.04309
cluster	41	GO:0097709	connective tissue replacement	6	1	0.04	0.04309
cluster	41	GO:0006152	purine nucleoside catabolic process	6	1	0.04	0.04309
cluster	41	GO:0002361	CD4-positive, CD25-positive, alpha-beta regulatory T cell differentiation	6	1	0.04	0.04309
cluster	41	GO:0048872	homeostasis of number of cells	181	4	1.32	0.04314
cluster	41	GO:0002684	positive regulation of immune system process	482	14	3.52	0.04369
cluster	41	GO:0031348	negative regulation of defense response	120	5	0.88	0.04606
cluster	41	GO:0008584	male gonad development	47	2	0.34	0.04612
cluster	41	GO:0002274	myeloid leukocyte activation	110	3	0.8	0.04638
cluster	41	GO:1901699	cellular response to nitrogen compound	269	5	1.97	0.04646
cluster	41	GO:0023014	signal transduction by protein phosphorylation	359	6	2.63	0.04672
cluster	41	GO:0000165	MAPK cascade	359	6	2.63	0.04672
cluster	41	GO:0001817	regulation of cytokine production	399	11	2.92	0.04679
cluster	41	GO:0030855	epithelial cell differentiation	271	5	1.98	0.0477
cluster	41	GO:0030968	endoplasmic reticulum unfolded protein response	48	2	0.35	0.04791
cluster	41	GO:0046546	development of primary male sexual characteristics	48	2	0.35	0.04791
cluster	41	GO:0002718	regulation of cytokine production involved in immune response	56	4	0.41	0.04888
cluster	41	GO:0002367	cytokine production involved in immune response	56	4	0.41	0.04888
cluster	41	GO:0002683	negative regulation of immune system process	256	10	1.87	0.04946
cluster	41	GO:0050792	regulation of viral process	113	3	0.83	0.04955
cluster	41	GO:0001816	cytokine production	404	11	2.95	0.04968
cluster	41	GO:0033077	T cell differentiation in thymus	49	2	0.36	0.04971
cluster	26	GO:0071385	cellular response to glucocorticoid stimulus	15	2	0.02	0.00023
cluster	26	GO:0050856	regulation of T cell receptor signaling pathway	26	2	0.04	0.00069
cluster	26	GO:0008037	cell recognition	53	2	0.08	0.00286
cluster	26	GO:0000956	nuclear-transcribed mRNA catabolic process	66	2	0.1	0.0044
cluster	26	GO:0032649	regulation of interferon-gamma production	67	2	0.1	0.00453
cluster	26	GO:0006959	humoral immune response	74	2	0.11	0.0055
cluster	26	GO:0051249	regulation of lymphocyte activation	255	3	0.39	0.00618
cluster	26	GO:0001819	positive regulation of cytokine production	268	3	0.41	0.00709
cluster	26	GO:0001768	establishment of T cell polarity	5	1	0.01	0.00762
cluster	26	GO:0002883	regulation of hypersensitivity	5	1	0.01	0.00762
cluster	26	GO:0072537	fibroblast activation	5	1	0.01	0.00762
cluster	26	GO:0002468	dendritic cell antigen processing and presentation	5	1	0.01	0.00762
cluster	26	GO:1901991	negative regulation of mitotic cell cycle phase transition	94	2	0.14	0.00875
cluster	26	GO:0045060	negative thymic T cell selection	6	1	0.01	0.00914
cluster	26	GO:2000048	negative regulation of cell-cell adhesion mediated by cadherin	6	1	0.01	0.00914
cluster	26	GO:0097011	cellular response to granulocyte macrophage colony-stimulating factor stimulus	6	1	0.01	0.00914
cluster	26	GO:0043065	positive regulation of apoptotic process	300	3	0.46	0.00967
cluster	26	GO:0007096	regulation of exit from mitosis	7	1	0.01	0.01065
cluster	26	GO:1901203	positive regulation of extracellular matrix assembly	7	1	0.01	0.01065
cluster	26	GO:0017014	protein nitrosylation	7	1	0.01	0.01065
cluster	26	GO:0003330	regulation of extracellular matrix constituent secretion	7	1	0.01	0.01065
cluster	26	GO:0018119	peptidyl-cysteine S-nitrosylation	7	1	0.01	0.01065
cluster	26	GO:0001666	response to hypoxia	108	2	0.17	0.01142
cluster	26	GO:0045619	regulation of lymphocyte differentiation	109	2	0.17	0.01163
cluster	26	GO:0036293	response to decreased oxygen levels	109	2	0.17	0.01163
cluster	26	GO:0071548	response to dexamethasone	8	1	0.01	0.01216
cluster	26	GO:0071549	cellular response to dexamethasone stimulus	8	1	0.01	0.01216
cluster	26	GO:1901201	regulation of extracellular matrix assembly	8	1	0.01	0.01216
cluster	26	GO:0045603	positive regulation of endothelial cell differentiation	8	1	0.01	0.01216
cluster	26	GO:0070278	extracellular matrix constituent secretion	8	1	0.01	0.01216
cluster	26	GO:0010560	positive regulation of glycoprotein biosynthetic process	8	1	0.01	0.01216
cluster	26	GO:0002836	positive regulation of response to tumor cell	8	1	0.01	0.01216
cluster	26	GO:0002839	positive regulation of immune response to tumor cell	8	1	0.01	0.01216
cluster	26	GO:2000510	positive regulation of dendritic cell chemotaxis	8	1	0.01	0.01216
cluster	26	GO:2000508	regulation of dendritic cell chemotaxis	8	1	0.01	0.01216
cluster	26	GO:0008285	negative regulation of cell population proliferation	331	3	0.51	0.01265
cluster	26	GO:0070482	response to oxygen levels	118	2	0.18	0.01353
cluster	26	GO:0001771	immunological synapse formation	9	1	0.01	0.01367
cluster	26	GO:0046007	negative regulation of activated T cell proliferation	9	1	0.01	0.01367
cluster	26	GO:1903020	positive regulation of glycoprotein metabolic process	9	1	0.01	0.01367
cluster	26	GO:0002863	positive regulation of inflammatory response to antigenic stimulus	9	1	0.01	0.01367
cluster	26	GO:0071850	mitotic cell cycle arrest	9	1	0.01	0.01367
cluster	26	GO:0048519	negative regulation of biological process	2656	10	4.06	0.0137
cluster	26	GO:1900151	regulation of nuclear-transcribed mRNA catabolic process, deadenylation-dependent decay	10	1	0.02	0.01518
cluster	26	GO:1900153	positive regulation of nuclear-transcribed mRNA catabolic process, deadenylation-dependent decay	10	1	0.02	0.01518
cluster	26	GO:0045820	negative regulation of glycolytic process	10	1	0.02	0.01518
cluster	26	GO:0002834	regulation of response to tumor cell	10	1	0.02	0.01518
cluster	26	GO:0002837	regulation of immune response to tumor cell	10	1	0.02	0.01518
cluster	26	GO:0046479	glycosphingolipid catabolic process	10	1	0.02	0.01518
cluster	26	GO:0060216	definitive hemopoiesis	10	1	0.02	0.01518
cluster	26	GO:0045663	positive regulation of myoblast differentiation	10	1	0.02	0.01518
cluster	26	GO:0007157	heterophilic cell-cell adhesion via plasma membrane cell adhesion molecules	10	1	0.02	0.01518
cluster	26	GO:0030155	regulation of cell adhesion	394	4	0.6	0.01573
cluster	26	GO:0002407	dendritic cell chemotaxis	11	1	0.02	0.01669
cluster	26	GO:0019377	glycolipid catabolic process	11	1	0.02	0.01669
cluster	26	GO:0002577	regulation of antigen processing and presentation	11	1	0.02	0.01669
cluster	26	GO:2001185	regulation of CD8-positive, alpha-beta T cell activation	11	1	0.02	0.01669
cluster	26	GO:0050862	positive regulation of T cell receptor signaling pathway	11	1	0.02	0.01669
cluster	26	GO:0045737	positive regulation of cyclin-dependent protein serine/threonine kinase activity	12	1	0.02	0.01819
cluster	26	GO:0002418	immune response to tumor cell	12	1	0.02	0.01819
cluster	26	GO:0002675	positive regulation of acute inflammatory response	12	1	0.02	0.01819
cluster	26	GO:0032695	negative regulation of interleukin-12 production	12	1	0.02	0.01819
cluster	26	GO:0032967	positive regulation of collagen biosynthetic process	12	1	0.02	0.01819
cluster	26	GO:2000353	positive regulation of endothelial cell apoptotic process	12	1	0.02	0.01819
cluster	26	GO:2000269	regulation of fibroblast apoptotic process	12	1	0.02	0.01819
cluster	26	GO:0050860	negative regulation of T cell receptor signaling pathway	12	1	0.02	0.01819
cluster	26	GO:0061158	3'-UTR-mediated mRNA destabilization	12	1	0.02	0.01819
cluster	26	GO:0001818	negative regulation of cytokine production	142	2	0.22	0.01921
cluster	26	GO:0044346	fibroblast apoptotic process	13	1	0.02	0.0197
cluster	26	GO:0002922	positive regulation of humoral immune response	13	1	0.02	0.0197
cluster	26	GO:1900543	negative regulation of purine nucleotide metabolic process	13	1	0.02	0.0197
cluster	26	GO:1903204	negative regulation of oxidative stress-induced neuron death	13	1	0.02	0.0197
cluster	26	GO:0090023	positive regulation of neutrophil chemotaxis	13	1	0.02	0.0197
cluster	26	GO:0010714	positive regulation of collagen metabolic process	13	1	0.02	0.0197
cluster	26	GO:0031349	positive regulation of defense response	145	2	0.22	0.01998
cluster	26	GO:0030217	T cell differentiation	165	3	0.25	0.02062
cluster	26	GO:0045980	negative regulation of nucleotide metabolic process	14	1	0.02	0.0212
cluster	26	GO:2000737	negative regulation of stem cell differentiation	14	1	0.02	0.0212
cluster	26	GO:1904031	positive regulation of cyclin-dependent protein kinase activity	14	1	0.02	0.0212
cluster	26	GO:1904037	positive regulation of epithelial cell apoptotic process	14	1	0.02	0.0212
cluster	26	GO:1903055	positive regulation of extracellular matrix organization	14	1	0.02	0.0212
cluster	26	GO:0071624	positive regulation of granulocyte chemotaxis	14	1	0.02	0.0212
cluster	26	GO:0032965	regulation of collagen biosynthetic process	14	1	0.02	0.0212
cluster	26	GO:0019369	arachidonic acid metabolic process	14	1	0.02	0.0212
cluster	26	GO:0045765	regulation of angiogenesis	151	2	0.23	0.02157
cluster	26	GO:0002252	immune effector process	407	3	0.62	0.02198
cluster	26	GO:0036037	CD8-positive, alpha-beta T cell activation	15	1	0.02	0.02269
cluster	26	GO:1902624	positive regulation of neutrophil migration	16	1	0.02	0.02419
cluster	26	GO:0010559	regulation of glycoprotein biosynthetic process	16	1	0.02	0.02419
cluster	26	GO:0009595	detection of biotic stimulus	16	1	0.02	0.02419
cluster	26	GO:1903203	regulation of oxidative stress-induced neuron death	16	1	0.02	0.02419
cluster	26	GO:0036336	dendritic cell migration	16	1	0.02	0.02419
cluster	26	GO:0050857	positive regulation of antigen receptor-mediated signaling pathway	16	1	0.02	0.02419
cluster	26	GO:0031295	T cell costimulation	16	1	0.02	0.02419
cluster	26	GO:0006950	response to stress	1767	7	2.7	0.02503
cluster	26	GO:1901342	regulation of vasculature development	165	2	0.25	0.02545
cluster	26	GO:0032964	collagen biosynthetic process	17	1	0.03	0.02568
cluster	26	GO:0010458	exit from mitosis	17	1	0.03	0.02568
cluster	26	GO:0090022	regulation of neutrophil chemotaxis	17	1	0.03	0.02568
cluster	26	GO:0050858	negative regulation of antigen receptor-mediated signaling pathway	17	1	0.03	0.02568
cluster	26	GO:0031294	lymphocyte costimulation	17	1	0.03	0.02568
cluster	26	GO:0045595	regulation of cell differentiation	776	4	1.19	0.0257
cluster	26	GO:1902105	regulation of leukocyte differentiation	168	2	0.26	0.02632
cluster	26	GO:0045954	positive regulation of natural killer cell mediated cytotoxicity	18	1	0.03	0.02718
cluster	26	GO:0036475	neuron death in response to oxidative stress	18	1	0.03	0.02718
cluster	26	GO:0002717	positive regulation of natural killer cell mediated immunity	18	1	0.03	0.02718
cluster	26	GO:1900087	positive regulation of G1/S transition of mitotic cell cycle	18	1	0.03	0.02718
cluster	26	GO:1903018	regulation of glycoprotein metabolic process	18	1	0.03	0.02718
cluster	26	GO:0002347	response to tumor cell	18	1	0.03	0.02718
cluster	26	GO:0010712	regulation of collagen metabolic process	18	1	0.03	0.02718
cluster	26	GO:0045601	regulation of endothelial cell differentiation	19	1	0.03	0.02866
cluster	26	GO:0043537	negative regulation of blood vessel endothelial cell migration	19	1	0.03	0.02866
cluster	26	GO:1903579	negative regulation of ATP metabolic process	19	1	0.03	0.02866
cluster	26	GO:0009311	oligosaccharide metabolic process	19	1	0.03	0.02866
cluster	26	GO:0045577	regulation of B cell differentiation	19	1	0.03	0.02866
cluster	26	GO:1903037	regulation of leukocyte cell-cell adhesion	179	2	0.27	0.02961
cluster	26	GO:0050900	leukocyte migration	179	2	0.27	0.02961
cluster	26	GO:0050863	regulation of T cell activation	184	2	0.28	0.03115
cluster	26	GO:0000184	nuclear-transcribed mRNA catabolic process, nonsense-mediated decay	21	1	0.03	0.03164
cluster	26	GO:0085029	extracellular matrix assembly	21	1	0.03	0.03164
cluster	26	GO:0071158	positive regulation of cell cycle arrest	21	1	0.03	0.03164
cluster	26	GO:0061157	mRNA destabilization	21	1	0.03	0.03164
cluster	26	GO:0017145	stem cell division	22	1	0.03	0.03312
cluster	26	GO:1902622	regulation of neutrophil migration	22	1	0.03	0.03312
cluster	26	GO:0002920	regulation of humoral immune response	22	1	0.03	0.03312
cluster	26	GO:0030149	sphingolipid catabolic process	22	1	0.03	0.03312
cluster	26	GO:0042269	regulation of natural killer cell mediated cytotoxicity	22	1	0.03	0.03312
cluster	26	GO:0001937	negative regulation of endothelial cell proliferation	22	1	0.03	0.03312
cluster	26	GO:0018198	peptidyl-cysteine modification	22	1	0.03	0.03312
cluster	26	GO:0071364	cellular response to epidermal growth factor stimulus	22	1	0.03	0.03312
cluster	26	GO:0006956	complement activation	23	1	0.04	0.0346
cluster	26	GO:0002715	regulation of natural killer cell mediated immunity	23	1	0.04	0.0346
cluster	26	GO:0046006	regulation of activated T cell proliferation	23	1	0.04	0.0346
cluster	26	GO:0032735	positive regulation of interleukin-12 production	23	1	0.04	0.0346
cluster	26	GO:0050779	RNA destabilization	23	1	0.04	0.0346
cluster	26	GO:0070849	response to epidermal growth factor	24	1	0.04	0.03608
cluster	26	GO:0035019	somatic stem cell population maintenance	24	1	0.04	0.03608
cluster	26	GO:0030098	lymphocyte differentiation	223	3	0.34	0.03673
cluster	26	GO:0007159	leukocyte cell-cell adhesion	202	2	0.31	0.03698
cluster	26	GO:0010596	negative regulation of endothelial cell migration	25	1	0.04	0.03756
cluster	26	GO:1902808	positive regulation of cell cycle G1/S phase transition	25	1	0.04	0.03756
cluster	26	GO:1903202	negative regulation of oxidative stress-induced cell death	25	1	0.04	0.03756
cluster	26	GO:1900408	negative regulation of cellular response to oxidative stress	25	1	0.04	0.03756
cluster	26	GO:0051254	positive regulation of RNA metabolic process	876	4	1.34	0.03814
cluster	26	GO:0006687	glycosphingolipid metabolic process	26	1	0.04	0.03903
cluster	26	GO:0045840	positive regulation of mitotic nuclear division	26	1	0.04	0.03903
cluster	26	GO:0071622	regulation of granulocyte chemotaxis	26	1	0.04	0.03903
cluster	26	GO:1902883	negative regulation of response to oxidative stress	26	1	0.04	0.03903
cluster	26	GO:0050798	activated T cell proliferation	26	1	0.04	0.03903
cluster	26	GO:0046466	membrane lipid catabolic process	26	1	0.04	0.03903
cluster	26	GO:0010677	negative regulation of cellular carbohydrate metabolic process	26	1	0.04	0.03903
cluster	26	GO:0006979	response to oxidative stress	209	2	0.32	0.03936
cluster	26	GO:1901135	carbohydrate derivative metabolic process	512	3	0.78	0.03983
cluster	26	GO:0022407	regulation of cell-cell adhesion	233	3	0.36	0.03988
cluster	26	GO:2000026	regulation of multicellular organismal development	889	4	1.36	0.03998
cluster	26	GO:0045599	negative regulation of fat cell differentiation	27	1	0.04	0.0405
cluster	26	GO:0097028	dendritic cell differentiation	27	1	0.04	0.0405
cluster	26	GO:0032007	negative regulation of TOR signaling	27	1	0.04	0.0405
cluster	26	GO:0045661	regulation of myoblast differentiation	27	1	0.04	0.0405
cluster	26	GO:0009988	cell-cell recognition	28	1	0.04	0.04198
cluster	26	GO:0006110	regulation of glycolytic process	28	1	0.04	0.04198
cluster	26	GO:1903053	regulation of extracellular matrix organization	28	1	0.04	0.04198
cluster	26	GO:0000288	nuclear-transcribed mRNA catabolic process, deadenylation-dependent decay	28	1	0.04	0.04198
cluster	26	GO:0032103	positive regulation of response to external stimulus	217	2	0.33	0.04214
cluster	26	GO:0050778	positive regulation of immune response	280	4	0.43	0.04229
cluster	26	GO:0008219	cell death	960	6	1.47	0.04322
cluster	26	GO:0045912	negative regulation of carbohydrate metabolic process	29	1	0.04	0.04344
cluster	26	GO:1901655	cellular response to ketone	29	1	0.04	0.04344
cluster	26	GO:0007155	cell adhesion	581	4	0.89	0.04393
cluster	26	GO:0022610	biological adhesion	586	4	0.9	0.04491
cluster	26	GO:2000736	regulation of stem cell differentiation	30	1	0.05	0.04491
cluster	26	GO:0001912	positive regulation of leukocyte mediated cytotoxicity	30	1	0.05	0.04491
cluster	26	GO:2000351	regulation of endothelial cell apoptotic process	30	1	0.05	0.04491
cluster	26	GO:0051496	positive regulation of stress fiber assembly	30	1	0.05	0.04491
cluster	26	GO:0051785	positive regulation of nuclear division	31	1	0.05	0.04637
cluster	26	GO:0001954	positive regulation of cell-matrix adhesion	31	1	0.05	0.04637
cluster	26	GO:0043470	regulation of carbohydrate catabolic process	31	1	0.05	0.04637
cluster	26	GO:0042771	intrinsic apoptotic signaling pathway in response to DNA damage by p53 class mediator	31	1	0.05	0.04637
cluster	26	GO:0097327	response to antineoplastic agent	31	1	0.05	0.04637
cluster	26	GO:0010557	positive regulation of macromolecule biosynthetic process	933	4	1.43	0.04661
cluster	26	GO:0001525	angiogenesis	231	2	0.35	0.04719
cluster	26	GO:0061014	positive regulation of mRNA catabolic process	32	1	0.05	0.04784
cluster	26	GO:0072577	endothelial cell apoptotic process	32	1	0.05	0.04784
cluster	26	GO:0010718	positive regulation of epithelial to mesenchymal transition	32	1	0.05	0.04784
cluster	26	GO:0051707	response to other organism	552	3	0.84	0.04814
cluster	26	GO:0043207	response to external biotic stimulus	552	3	0.84	0.04814
cluster	26	GO:1903706	regulation of hemopoiesis	234	2	0.36	0.0483
cluster	26	GO:0030858	positive regulation of epithelial cell differentiation	33	1	0.05	0.0493
cluster	26	GO:0001676	long-chain fatty acid metabolic process	33	1	0.05	0.0493
cluster	26	GO:0030593	neutrophil chemotaxis	33	1	0.05	0.0493
cluster	12	GO:0043537	negative regulation of blood vessel endothelial cell migration	19	4	0.26	0.00011
cluster	12	GO:0050766	positive regulation of phagocytosis	24	4	0.33	0.00028
cluster	12	GO:0045661	regulation of myoblast differentiation	27	4	0.37	0.00045
cluster	12	GO:0051085	chaperone cofactor-dependent protein refolding	12	3	0.16	0.0005
cluster	12	GO:0046716	muscle cell cellular homeostasis	12	3	0.16	0.0005
cluster	12	GO:1990869	cellular response to chemokine	29	4	0.4	0.0006
cluster	12	GO:0071385	cellular response to glucocorticoid stimulus	15	3	0.2	0.001
cluster	12	GO:0019430	removal of superoxide radicals	15	3	0.2	0.001
cluster	12	GO:0045619	regulation of lymphocyte differentiation	109	8	1.49	0.00112
cluster	12	GO:0050864	regulation of B cell activation	88	6	1.2	0.00124
cluster	12	GO:1903037	regulation of leukocyte cell-cell adhesion	179	11	2.44	0.0014
cluster	12	GO:0090162	establishment of epithelial cell polarity	17	3	0.23	0.00147
cluster	12	GO:0010573	vascular endothelial growth factor production	17	3	0.23	0.00147
cluster	12	GO:0002763	positive regulation of myeloid leukocyte differentiation	38	4	0.52	0.0017
cluster	12	GO:0045730	respiratory burst	18	3	0.25	0.00174
cluster	12	GO:0046886	positive regulation of hormone biosynthetic process	5	2	0.07	0.0018
cluster	12	GO:2000179	positive regulation of neural precursor cell proliferation	20	3	0.27	0.00239
cluster	12	GO:1904035	regulation of epithelial cell apoptotic process	42	4	0.57	0.00248
cluster	12	GO:0030855	epithelial cell differentiation	271	15	3.7	0.00259
cluster	12	GO:1903753	negative regulation of p38MAPK cascade	6	2	0.08	0.00267
cluster	12	GO:0031665	negative regulation of lipopolysaccharide-mediated signaling pathway	6	2	0.08	0.00267
cluster	12	GO:0002551	mast cell chemotaxis	6	2	0.08	0.00267
cluster	12	GO:0000185	activation of MAPKKK activity	6	2	0.08	0.00267
cluster	12	GO:0002925	positive regulation of humoral immune response mediated by circulating immunoglobulin	6	2	0.08	0.00267
cluster	12	GO:0008298	intracellular mRNA localization	6	2	0.08	0.00267
cluster	12	GO:2000379	positive regulation of reactive oxygen species metabolic process	43	4	0.59	0.0027
cluster	12	GO:0022408	negative regulation of cell-cell adhesion	103	6	1.41	0.00278
cluster	12	GO:0032103	positive regulation of response to external stimulus	217	9	2.96	0.00282
cluster	12	GO:0007186	G protein-coupled receptor signaling pathway	262	10	3.57	0.00304
cluster	12	GO:0071345	cellular response to cytokine stimulus	385	18	5.25	0.0033
cluster	12	GO:0038066	p38MAPK cascade	29	5	0.4	0.00344
cluster	12	GO:1903409	reactive oxygen species biosynthetic process	46	4	0.63	0.00346
cluster	12	GO:0050866	negative regulation of cell activation	108	6	1.47	0.00352
cluster	12	GO:0001666	response to hypoxia	108	6	1.47	0.00352
cluster	12	GO:0071634	regulation of transforming growth factor beta production	23	3	0.31	0.0036
cluster	12	GO:0019221	cytokine-mediated signaling pathway	184	8	2.51	0.00362
cluster	12	GO:0051348	negative regulation of transferase activity	145	7	1.98	0.00363
cluster	12	GO:0006958	complement activation, classical pathway	7	2	0.1	0.00371
cluster	12	GO:0031650	regulation of heat generation	7	2	0.1	0.00371
cluster	12	GO:0048711	positive regulation of astrocyte differentiation	7	2	0.1	0.00371
cluster	12	GO:0071472	cellular response to salt stress	7	2	0.1	0.00371
cluster	12	GO:0045059	positive thymic T cell selection	7	2	0.1	0.00371
cluster	12	GO:0045647	negative regulation of erythrocyte differentiation	7	2	0.1	0.00371
cluster	12	GO:1990440	positive regulation of transcription from RNA polymerase II promoter in response to endoplasmic reticulum stress	7	2	0.1	0.00371
cluster	12	GO:0000187	activation of MAPK activity	48	4	0.65	0.00404
cluster	12	GO:0035308	negative regulation of protein dephosphorylation	24	3	0.33	0.00407
cluster	12	GO:0030866	cortical actin cytoskeleton organization	24	3	0.33	0.00407
cluster	12	GO:0042531	positive regulation of tyrosine phosphorylation of STAT protein	25	3	0.34	0.00458
cluster	12	GO:1903313	positive regulation of mRNA metabolic process	50	4	0.68	0.00469
cluster	12	GO:0060251	regulation of glial cell proliferation	8	2	0.11	0.0049
cluster	12	GO:0032402	melanosome transport	8	2	0.11	0.0049
cluster	12	GO:0002070	epithelial cell maturation	8	2	0.11	0.0049
cluster	12	GO:0030502	negative regulation of bone mineralization	8	2	0.11	0.0049
cluster	12	GO:0042026	protein refolding	8	2	0.11	0.0049
cluster	12	GO:0097494	regulation of vesicle size	8	2	0.11	0.0049
cluster	12	GO:0071322	cellular response to carbohydrate stimulus	52	4	0.71	0.00539
cluster	12	GO:0007043	cell-cell junction assembly	52	4	0.71	0.00539
cluster	12	GO:0006096	glycolytic process	52	4	0.71	0.00539
cluster	12	GO:0043065	positive regulation of apoptotic process	300	12	4.09	0.00547
cluster	12	GO:0050863	regulation of T cell activation	184	12	2.51	0.00548
cluster	12	GO:0042102	positive regulation of T cell proliferation	53	4	0.72	0.00577
cluster	12	GO:0043112	receptor metabolic process	85	5	1.16	0.006
cluster	12	GO:0045934	negative regulation of nucleobase-containing compound metabolic process	750	19	10.23	0.0061
cluster	12	GO:0043374	CD8-positive, alpha-beta T cell differentiation	9	2	0.12	0.00624
cluster	12	GO:0030953	astral microtubule organization	9	2	0.12	0.00624
cluster	12	GO:0071850	mitotic cell cycle arrest	9	2	0.12	0.00624
cluster	12	GO:0071803	positive regulation of podosome assembly	9	2	0.12	0.00624
cluster	12	GO:0001503	ossification	173	9	2.36	0.00673
cluster	12	GO:0050878	regulation of body fluid levels	124	6	1.69	0.0069
cluster	12	GO:0009611	response to wounding	205	8	2.8	0.0069
cluster	12	GO:0045087	innate immune response	251	9	3.42	0.00729
cluster	12	GO:0031663	lipopolysaccharide-mediated signaling pathway	36	5	0.49	0.00737
cluster	12	GO:0003158	endothelium development	57	4	0.78	0.00747
cluster	12	GO:0001892	embryonic placenta development	57	4	0.78	0.00747
cluster	12	GO:0048024	regulation of mRNA splicing, via spliceosome	57	4	0.78	0.00747
cluster	12	GO:0009896	positive regulation of catabolic process	252	9	3.44	0.00747
cluster	12	GO:0001912	positive regulation of leukocyte mediated cytotoxicity	30	3	0.41	0.00769
cluster	12	GO:0060576	intestinal epithelial cell development	10	2	0.14	0.00774
cluster	12	GO:0034116	positive regulation of heterotypic cell-cell adhesion	10	2	0.14	0.00774
cluster	12	GO:0043373	CD4-positive, alpha-beta T cell lineage commitment	10	2	0.14	0.00774
cluster	12	GO:0070262	peptidyl-serine dephosphorylation	10	2	0.14	0.00774
cluster	12	GO:0046916	cellular transition metal ion homeostasis	58	4	0.79	0.00794
cluster	12	GO:0002312	B cell activation involved in immune response	58	4	0.79	0.00794
cluster	12	GO:0009890	negative regulation of biosynthetic process	772	19	10.53	0.00824
cluster	12	GO:0006006	glucose metabolic process	92	5	1.26	0.00834
cluster	12	GO:0048864	stem cell development	31	3	0.42	0.00843
cluster	12	GO:0045604	regulation of epidermal cell differentiation	31	3	0.42	0.00843
cluster	12	GO:0045580	regulation of T cell differentiation	93	5	1.27	0.00872
cluster	12	GO:0050796	regulation of insulin secretion	60	4	0.82	0.00894
cluster	12	GO:0042098	T cell proliferation	115	8	1.57	0.00914
cluster	12	GO:0051707	response to other organism	552	21	7.53	0.00919
cluster	12	GO:0001656	metanephros development	32	3	0.44	0.00922
cluster	12	GO:0016999	antibiotic metabolic process	32	3	0.44	0.00922
cluster	12	GO:0006910	phagocytosis, recognition	11	2	0.15	0.00937
cluster	12	GO:0043525	positive regulation of neuron apoptotic process	11	2	0.15	0.00937
cluster	12	GO:0002689	negative regulation of leukocyte chemotaxis	11	2	0.15	0.00937
cluster	12	GO:0072012	glomerulus vasculature development	11	2	0.15	0.00937
cluster	12	GO:0032516	positive regulation of phosphoprotein phosphatase activity	11	2	0.15	0.00937
cluster	12	GO:1900409	positive regulation of cellular response to oxidative stress	11	2	0.15	0.00937
cluster	12	GO:0043524	negative regulation of neuron apoptotic process	61	4	0.83	0.00947
cluster	12	GO:1903076	regulation of protein localization to plasma membrane	61	4	0.83	0.00947
cluster	12	GO:0043433	negative regulation of DNA-binding transcription factor activity	96	5	1.31	0.00993
cluster	12	GO:0097190	apoptotic signaling pathway	360	11	4.91	0.01002
cluster	12	GO:0001961	positive regulation of cytokine-mediated signaling pathway	33	3	0.45	0.01004
cluster	12	GO:0034394	protein localization to cell surface	33	3	0.45	0.01004
cluster	12	GO:0099024	plasma membrane invagination	33	3	0.45	0.01004
cluster	12	GO:1903426	regulation of reactive oxygen species biosynthetic process	33	3	0.45	0.01004
cluster	12	GO:0010629	negative regulation of gene expression	1005	26	13.71	0.01007
cluster	12	GO:0031331	positive regulation of cellular catabolic process	219	8	2.99	0.01009
cluster	12	GO:0045667	regulation of osteoblast differentiation	63	4	0.86	0.01058
cluster	12	GO:0022411	cellular component disassembly	221	8	3.02	0.01063
cluster	12	GO:0050851	antigen receptor-mediated signaling pathway	98	5	1.34	0.0108
cluster	12	GO:0009408	response to heat	34	3	0.46	0.0109
cluster	12	GO:0003151	outflow tract morphogenesis	34	3	0.46	0.0109
cluster	12	GO:0072091	regulation of stem cell proliferation	34	3	0.46	0.0109
cluster	12	GO:0060712	spongiotrophoblast layer development	12	2	0.16	0.01114
cluster	12	GO:1904996	positive regulation of leukocyte adhesion to vascular endothelial cell	12	2	0.16	0.01114
cluster	12	GO:0050860	negative regulation of T cell receptor signaling pathway	12	2	0.16	0.01114
cluster	12	GO:0045737	positive regulation of cyclin-dependent protein serine/threonine kinase activity	12	2	0.16	0.01114
cluster	12	GO:0061158	3'-UTR-mediated mRNA destabilization	12	2	0.16	0.01114
cluster	12	GO:0048302	regulation of isotype switching to IgG isotypes	12	2	0.16	0.01114
cluster	12	GO:0071705	nitrogen compound transport	878	23	11.98	0.01129
cluster	12	GO:0002695	negative regulation of leukocyte activation	100	5	1.36	0.01172
cluster	12	GO:0042267	natural killer cell mediated cytotoxicity	35	3	0.48	0.01181
cluster	12	GO:0003014	renal system process	35	3	0.48	0.01181
cluster	12	GO:0010720	positive regulation of cell development	191	9	2.61	0.01188
cluster	12	GO:0042127	regulation of cell population proliferation	750	24	10.23	0.01191
cluster	12	GO:0051253	negative regulation of RNA metabolic process	688	17	9.39	0.01194
cluster	12	GO:0050769	positive regulation of neurogenesis	149	8	2.03	0.01209
cluster	12	GO:0050868	negative regulation of T cell activation	66	4	0.9	0.01241
cluster	12	GO:0030278	regulation of ossification	111	7	1.51	0.01242
cluster	12	GO:0045682	regulation of epidermis development	44	5	0.6	0.01254
cluster	12	GO:0002833	positive regulation of response to biotic stimulus	102	5	1.39	0.01269
cluster	12	GO:0030101	natural killer cell activation	36	3	0.49	0.01275
cluster	12	GO:0006446	regulation of translational initiation	36	3	0.49	0.01275
cluster	12	GO:1903078	positive regulation of protein localization to plasma membrane	36	3	0.49	0.01275
cluster	12	GO:0002228	natural killer cell mediated immunity	36	3	0.49	0.01275
cluster	12	GO:0070228	regulation of lymphocyte apoptotic process	36	3	0.49	0.01275
cluster	12	GO:0048291	isotype switching to IgG isotypes	13	2	0.18	0.01305
cluster	12	GO:0097734	extracellular exosome biogenesis	13	2	0.18	0.01305
cluster	12	GO:0035162	embryonic hemopoiesis	13	2	0.18	0.01305
cluster	12	GO:0048535	lymph node development	13	2	0.18	0.01305
cluster	12	GO:0090184	positive regulation of kidney development	13	2	0.18	0.01305
cluster	12	GO:0048026	positive regulation of mRNA splicing, via spliceosome	13	2	0.18	0.01305
cluster	12	GO:0045662	negative regulation of myoblast differentiation	13	2	0.18	0.01305
cluster	12	GO:1990182	exosomal secretion	13	2	0.18	0.01305
cluster	12	GO:0007519	skeletal muscle tissue development	67	4	0.91	0.01307
cluster	12	GO:0051251	positive regulation of lymphocyte activation	159	9	2.17	0.0133
cluster	12	GO:0002363	alpha-beta T cell lineage commitment	11	3	0.15	0.01344
cluster	12	GO:0002684	positive regulation of immune system process	482	22	6.58	0.01348
cluster	12	GO:0006413	translational initiation	68	4	0.93	0.01374
cluster	12	GO:0050853	B cell receptor signaling pathway	37	3	0.5	0.01374
cluster	12	GO:0040014	regulation of multicellular organism growth	37	3	0.5	0.01374
cluster	12	GO:0070373	negative regulation of ERK1 and ERK2 cascade	37	3	0.5	0.01374
cluster	12	GO:0030856	regulation of epithelial cell differentiation	69	6	0.94	0.01397
cluster	12	GO:1903532	positive regulation of secretion by cell	105	5	1.43	0.01425
cluster	12	GO:0031349	positive regulation of defense response	145	6	1.98	0.01427
cluster	12	GO:0097193	intrinsic apoptotic signaling pathway	188	7	2.56	0.01433
cluster	12	GO:0060538	skeletal muscle organ development	69	4	0.94	0.01443
cluster	12	GO:0006879	cellular iron ion homeostasis	38	3	0.52	0.01477
cluster	12	GO:1904031	positive regulation of cyclin-dependent protein kinase activity	14	2	0.19	0.0151
cluster	12	GO:1901099	negative regulation of signal transduction in absence of ligand	14	2	0.19	0.0151
cluster	12	GO:0140112	extracellular vesicle biogenesis	14	2	0.19	0.0151
cluster	12	GO:0001779	natural killer cell differentiation	14	2	0.19	0.0151
cluster	12	GO:0042743	hydrogen peroxide metabolic process	14	2	0.19	0.0151
cluster	12	GO:1900017	positive regulation of cytokine production involved in inflammatory response	14	2	0.19	0.0151
cluster	12	GO:0070102	interleukin-6-mediated signaling pathway	14	2	0.19	0.0151
cluster	12	GO:0090025	regulation of monocyte chemotaxis	14	2	0.19	0.0151
cluster	12	GO:2001240	negative regulation of extrinsic apoptotic signaling pathway in absence of ligand	14	2	0.19	0.0151
cluster	12	GO:0010324	membrane invagination	39	3	0.53	0.01585
cluster	12	GO:0060760	positive regulation of response to cytokine stimulus	39	3	0.53	0.01585
cluster	12	GO:0022406	membrane docking	39	3	0.53	0.01585
cluster	12	GO:0070972	protein localization to endoplasmic reticulum	39	3	0.53	0.01585
cluster	12	GO:0007162	negative regulation of cell adhesion	144	9	1.96	0.01639
cluster	12	GO:0002757	immune response-activating signal transduction	109	5	1.49	0.01652
cluster	12	GO:0051047	positive regulation of secretion	109	5	1.49	0.01652
cluster	12	GO:0002429	immune response-activating cell surface receptor signaling pathway	109	5	1.49	0.01652
cluster	12	GO:0045089	positive regulation of innate immune response	72	4	0.98	0.01665
cluster	12	GO:0043467	regulation of generation of precursor metabolites and energy	72	4	0.98	0.01665
cluster	12	GO:2001233	regulation of apoptotic signaling pathway	240	8	3.27	0.01679
cluster	12	GO:0010469	regulation of signaling receptor activity	40	3	0.55	0.01697
cluster	12	GO:0002532	production of molecular mediator involved in inflammatory response	40	3	0.55	0.01697
cluster	12	GO:0050854	regulation of antigen receptor-mediated signaling pathway	40	3	0.55	0.01697
cluster	12	GO:0042491	inner ear auditory receptor cell differentiation	15	2	0.2	0.01726
cluster	12	GO:0006940	regulation of smooth muscle contraction	15	2	0.2	0.01726
cluster	12	GO:0060122	inner ear receptor cell stereocilium organization	15	2	0.2	0.01726
cluster	12	GO:0000122	negative regulation of transcription by RNA polymerase II	443	12	6.04	0.01761
cluster	12	GO:0050708	regulation of protein secretion	102	7	1.39	0.01805
cluster	12	GO:1904377	positive regulation of protein localization to cell periphery	41	3	0.56	0.01813
cluster	12	GO:1903707	negative regulation of hemopoiesis	82	6	1.12	0.01813
cluster	12	GO:1903038	negative regulation of leukocyte cell-cell adhesion	74	4	1.01	0.01824
cluster	12	GO:0045787	positive regulation of cell cycle	198	7	2.7	0.01855
cluster	12	GO:1903530	regulation of secretion by cell	218	10	2.97	0.01864
cluster	12	GO:0002768	immune response-regulating cell surface receptor signaling pathway	113	5	1.54	0.01902
cluster	12	GO:0043588	skin development	113	5	1.54	0.01902
cluster	12	GO:2000377	regulation of reactive oxygen species metabolic process	86	7	1.17	0.01913
cluster	12	GO:0051028	mRNA transport	42	3	0.57	0.01933
cluster	12	GO:0048660	regulation of smooth muscle cell proliferation	42	3	0.57	0.01933
cluster	12	GO:0051962	positive regulation of nervous system development	165	8	2.25	0.01954
cluster	12	GO:0090322	regulation of superoxide metabolic process	16	2	0.22	0.01956
cluster	12	GO:1904994	regulation of leukocyte adhesion to vascular endothelial cell	16	2	0.22	0.01956
cluster	12	GO:0014037	Schwann cell differentiation	16	2	0.22	0.01956
cluster	12	GO:0002764	immune response-regulating signaling pathway	114	5	1.56	0.01968
cluster	12	GO:0001959	regulation of cytokine-mediated signaling pathway	76	4	1.04	0.01993
cluster	12	GO:0006469	negative regulation of protein kinase activity	115	5	1.57	0.02035
cluster	12	GO:0048638	regulation of developmental growth	115	5	1.57	0.02035
cluster	12	GO:0099173	postsynapse organization	43	3	0.59	0.02058
cluster	12	GO:0048659	smooth muscle cell proliferation	43	3	0.59	0.02058
cluster	12	GO:0098586	cellular response to virus	43	3	0.59	0.02058
cluster	12	GO:0009617	response to bacterium	246	12	3.36	0.02063
cluster	12	GO:0032940	secretion by cell	316	12	4.31	0.02063
cluster	12	GO:0006952	defense response	618	19	8.43	0.02108
cluster	12	GO:0010558	negative regulation of macromolecule biosynthetic process	735	17	10.03	0.02161
cluster	12	GO:0007052	mitotic spindle organization	78	4	1.06	0.0217
cluster	12	GO:0045732	positive regulation of protein catabolic process	117	5	1.6	0.02175
cluster	12	GO:0051241	negative regulation of multicellular organismal process	546	23	7.45	0.0218
cluster	12	GO:0008217	regulation of blood pressure	44	3	0.6	0.02187
cluster	12	GO:0061061	muscle structure development	238	11	3.25	0.02188
cluster	12	GO:0060119	inner ear receptor cell development	17	2	0.23	0.02197
cluster	12	GO:0035315	hair cell differentiation	17	2	0.23	0.02197
cluster	12	GO:1902175	regulation of oxidative stress-induced intrinsic apoptotic signaling pathway	17	2	0.23	0.02197
cluster	12	GO:0036010	protein localization to endosome	17	2	0.23	0.02197
cluster	12	GO:0050858	negative regulation of antigen receptor-mediated signaling pathway	17	2	0.23	0.02197
cluster	12	GO:0010837	regulation of keratinocyte proliferation	17	2	0.23	0.02197
cluster	12	GO:0050808	synapse organization	118	5	1.61	0.02248
cluster	12	GO:0010634	positive regulation of epithelial cell migration	79	4	1.08	0.02262
cluster	12	GO:1903507	negative regulation of nucleic acid-templated transcription	626	15	8.54	0.02301
cluster	12	GO:1902679	negative regulation of RNA biosynthetic process	626	15	8.54	0.02301
cluster	12	GO:0002696	positive regulation of leukocyte activation	175	9	2.39	0.02305
cluster	12	GO:0021987	cerebral cortex development	45	3	0.61	0.0232
cluster	12	GO:0070227	lymphocyte apoptotic process	45	3	0.61	0.0232
cluster	12	GO:0097242	amyloid-beta clearance	18	2	0.25	0.0245
cluster	12	GO:0002717	positive regulation of natural killer cell mediated immunity	18	2	0.25	0.0245
cluster	12	GO:0032467	positive regulation of cytokinesis	18	2	0.25	0.0245
cluster	12	GO:0050892	intestinal absorption	18	2	0.25	0.0245
cluster	12	GO:0045672	positive regulation of osteoclast differentiation	18	2	0.25	0.0245
cluster	12	GO:0002313	mature B cell differentiation involved in immune response	18	2	0.25	0.0245
cluster	12	GO:0045954	positive regulation of natural killer cell mediated cytotoxicity	18	2	0.25	0.0245
cluster	12	GO:0015031	protein transport	708	19	9.66	0.0245
cluster	12	GO:0002562	somatic diversification of immune receptors via germline recombination within a single locus	46	3	0.63	0.02458
cluster	12	GO:0055072	iron ion homeostasis	46	3	0.63	0.02458
cluster	12	GO:0016444	somatic cell DNA recombination	46	3	0.63	0.02458
cluster	12	GO:0071900	regulation of protein serine/threonine kinase activity	223	11	3.04	0.02466
cluster	12	GO:0050776	regulation of immune response	384	14	5.24	0.02492
cluster	12	GO:1901342	regulation of vasculature development	165	6	2.25	0.02524
cluster	12	GO:0050867	positive regulation of cell activation	179	9	2.44	0.02605
cluster	12	GO:0051250	negative regulation of lymphocyte activation	83	4	1.13	0.02655
cluster	12	GO:0051046	regulation of secretion	232	10	3.17	0.02696
cluster	12	GO:0098609	cell-cell adhesion	348	18	4.75	0.02697
cluster	12	GO:0032984	protein-containing complex disassembly	124	5	1.69	0.02713
cluster	12	GO:1903599	positive regulation of autophagy of mitochondrion	19	2	0.26	0.02714
cluster	12	GO:1903579	negative regulation of ATP metabolic process	19	2	0.26	0.02714
cluster	12	GO:0071354	cellular response to interleukin-6	19	2	0.26	0.02714
cluster	12	GO:0045577	regulation of B cell differentiation	19	2	0.26	0.02714
cluster	12	GO:0050685	positive regulation of mRNA processing	19	2	0.26	0.02714
cluster	12	GO:0045616	regulation of keratinocyte differentiation	19	2	0.26	0.02714
cluster	12	GO:0045601	regulation of endothelial cell differentiation	19	2	0.26	0.02714
cluster	12	GO:0032515	negative regulation of phosphoprotein phosphatase activity	19	2	0.26	0.02714
cluster	12	GO:0035036	sperm-egg recognition	19	2	0.26	0.02714
cluster	12	GO:1903428	positive regulation of reactive oxygen species biosynthetic process	19	2	0.26	0.02714
cluster	12	GO:2001239	regulation of extrinsic apoptotic signaling pathway in absence of ligand	19	2	0.26	0.02714
cluster	12	GO:0001818	negative regulation of cytokine production	142	9	1.94	0.02721
cluster	12	GO:0031623	receptor internalization	48	3	0.65	0.02747
cluster	12	GO:0090307	mitotic spindle assembly	48	3	0.65	0.02747
cluster	12	GO:0071333	cellular response to glucose stimulus	48	3	0.65	0.02747
cluster	12	GO:0019722	calcium-mediated signaling	84	4	1.15	0.0276
cluster	12	GO:0071902	positive regulation of protein serine/threonine kinase activity	140	9	1.91	0.02761
cluster	12	GO:0043085	positive regulation of catalytic activity	557	18	7.6	0.02775
cluster	12	GO:0045184	establishment of protein localization	779	20	10.63	0.02824
cluster	12	GO:0009605	response to external stimulus	1074	35	14.65	0.02825
cluster	12	GO:0140352	export from cell	332	12	4.53	0.02835
cluster	12	GO:0060759	regulation of response to cytokine stimulus	85	4	1.16	0.02866
cluster	12	GO:0033673	negative regulation of kinase activity	126	5	1.72	0.02881
cluster	12	GO:0030216	keratinocyte differentiation	49	3	0.67	0.02897
cluster	12	GO:0071326	cellular response to monosaccharide stimulus	49	3	0.67	0.02897
cluster	12	GO:0009266	response to temperature stimulus	49	3	0.67	0.02897
cluster	12	GO:0071331	cellular response to hexose stimulus	49	3	0.67	0.02897
cluster	12	GO:0034113	heterotypic cell-cell adhesion	30	4	0.41	0.02907
cluster	12	GO:0002376	immune system process	1236	49	16.86	0.02908
cluster	12	GO:0009888	tissue development	811	28	11.06	0.02909
cluster	12	GO:0031327	negative regulation of cellular biosynthetic process	763	17	10.41	0.02973
cluster	12	GO:0001913	T cell mediated cytotoxicity	20	2	0.27	0.02989
cluster	12	GO:0070741	response to interleukin-6	20	2	0.27	0.02989
cluster	12	GO:0031018	endocrine pancreas development	20	2	0.27	0.02989
cluster	12	GO:0002548	monocyte chemotaxis	20	2	0.27	0.02989
cluster	12	GO:0090183	regulation of kidney development	20	2	0.27	0.02989
cluster	12	GO:0001523	retinoid metabolic process	20	2	0.27	0.02989
cluster	12	GO:0045047	protein targeting to ER	20	2	0.27	0.02989
cluster	12	GO:2000648	positive regulation of stem cell proliferation	20	2	0.27	0.02989
cluster	12	GO:2000008	regulation of protein localization to cell surface	20	2	0.27	0.02989
cluster	12	GO:0008544	epidermis development	119	7	1.62	0.02996
cluster	12	GO:2000106	regulation of leukocyte apoptotic process	50	3	0.68	0.03052
cluster	12	GO:1903312	negative regulation of mRNA metabolic process	50	3	0.68	0.03052
cluster	12	GO:0006605	protein targeting	129	5	1.76	0.03146
cluster	12	GO:0045597	positive regulation of cell differentiation	435	16	5.93	0.03147
cluster	12	GO:0035264	multicellular organism growth	88	4	1.2	0.03201
cluster	12	GO:2001236	regulation of extrinsic apoptotic signaling pathway	88	4	1.2	0.03201
cluster	12	GO:0002637	regulation of immunoglobulin production	51	3	0.7	0.03212
cluster	12	GO:0002200	somatic diversification of immune receptors	51	3	0.7	0.03212
cluster	12	GO:0031347	regulation of defense response	323	9	4.41	0.03234
cluster	12	GO:1902930	regulation of alcohol biosynthetic process	21	2	0.29	0.03274
cluster	12	GO:0050891	multicellular organismal water homeostasis	21	2	0.29	0.03274
cluster	12	GO:0070098	chemokine-mediated signaling pathway	21	2	0.29	0.03274
cluster	12	GO:0071320	cellular response to cAMP	21	2	0.29	0.03274
cluster	12	GO:0060563	neuroepithelial cell differentiation	21	2	0.29	0.03274
cluster	12	GO:0048661	positive regulation of smooth muscle cell proliferation	21	2	0.29	0.03274
cluster	12	GO:0061157	mRNA destabilization	21	2	0.29	0.03274
cluster	12	GO:0051781	positive regulation of cell division	21	2	0.29	0.03274
cluster	12	GO:0048568	embryonic organ development	191	9	2.61	0.03285
cluster	12	GO:0050714	positive regulation of protein secretion	52	3	0.71	0.03375
cluster	12	GO:0032755	positive regulation of interleukin-6 production	52	3	0.71	0.03375
cluster	12	GO:0040012	regulation of locomotion	483	17	6.59	0.03381
cluster	12	GO:0007159	leukocyte cell-cell adhesion	202	13	2.76	0.03396
cluster	12	GO:0015833	peptide transport	736	19	10.04	0.03401
cluster	12	GO:0045321	leukocyte activation	474	28	6.47	0.03403
cluster	12	GO:0009887	animal organ morphogenesis	379	10	5.17	0.03412
cluster	12	GO:0002064	epithelial cell development	108	7	1.47	0.0343
cluster	12	GO:0050777	negative regulation of immune response	90	4	1.23	0.03436
cluster	12	GO:0042742	defense response to bacterium	90	4	1.23	0.03436
cluster	12	GO:0001649	osteoblast differentiation	90	4	1.23	0.03436
cluster	12	GO:0044093	positive regulation of molecular function	752	21	10.26	0.03463
cluster	12	GO:0002791	regulation of peptide secretion	114	7	1.56	0.0348
cluster	12	GO:1903708	positive regulation of hemopoiesis	131	8	1.79	0.03485
cluster	12	GO:0019932	second-messenger-mediated signaling	133	5	1.81	0.03521
cluster	12	GO:0045446	endothelial cell differentiation	53	3	0.72	0.03543
cluster	12	GO:1903578	regulation of ATP metabolic process	53	3	0.72	0.03543
cluster	12	GO:0006417	regulation of translation	179	6	2.44	0.03561
cluster	12	GO:0009615	response to virus	179	6	2.44	0.03561
cluster	12	GO:0001937	negative regulation of endothelial cell proliferation	22	2	0.3	0.0357
cluster	12	GO:0016101	diterpenoid metabolic process	22	2	0.3	0.0357
cluster	12	GO:0002701	negative regulation of production of molecular mediator of immune response	22	2	0.3	0.0357
cluster	12	GO:0042269	regulation of natural killer cell mediated cytotoxicity	22	2	0.3	0.0357
cluster	12	GO:0071364	cellular response to epidermal growth factor stimulus	22	2	0.3	0.0357
cluster	12	GO:0098930	axonal transport	22	2	0.3	0.0357
cluster	12	GO:0045066	regulatory T cell differentiation	22	2	0.3	0.0357
cluster	12	GO:0035088	establishment or maintenance of apical/basal cell polarity	22	2	0.3	0.0357
cluster	12	GO:0061245	establishment or maintenance of bipolar cell polarity	22	2	0.3	0.0357
cluster	12	GO:0033120	positive regulation of RNA splicing	22	2	0.3	0.0357
cluster	12	GO:0003073	regulation of systemic arterial blood pressure	22	2	0.3	0.0357
cluster	12	GO:0060113	inner ear receptor cell differentiation	22	2	0.3	0.0357
cluster	12	GO:0061024	membrane organization	330	9	4.5	0.03635
cluster	12	GO:0045931	positive regulation of mitotic cell cycle	92	4	1.26	0.03681
cluster	12	GO:0051347	positive regulation of transferase activity	290	12	3.96	0.03686
cluster	12	GO:0071702	organic substance transport	1051	24	14.34	0.03709
cluster	12	GO:1902106	negative regulation of leukocyte differentiation	54	3	0.74	0.03715
cluster	12	GO:0048585	negative regulation of response to stimulus	840	22	11.46	0.03815
cluster	12	GO:0048514	blood vessel morphogenesis	281	8	3.83	0.03819
cluster	12	GO:2000113	negative regulation of cellular macromolecule biosynthetic process	728	16	9.93	0.03851
cluster	12	GO:0002715	regulation of natural killer cell mediated immunity	23	2	0.31	0.03876
cluster	12	GO:0030104	water homeostasis	23	2	0.31	0.03876
cluster	12	GO:0002707	negative regulation of lymphocyte mediated immunity	23	2	0.31	0.03876
cluster	12	GO:0050779	RNA destabilization	23	2	0.31	0.03876
cluster	12	GO:0045744	negative regulation of G protein-coupled receptor signaling pathway	23	2	0.31	0.03876
cluster	12	GO:0072599	establishment of protein localization to endoplasmic reticulum	23	2	0.31	0.03876
cluster	12	GO:0120163	negative regulation of cold-induced thermogenesis	23	2	0.31	0.03876
cluster	12	GO:0002335	mature B cell differentiation	23	2	0.31	0.03876
cluster	12	GO:2000378	negative regulation of reactive oxygen species metabolic process	23	2	0.31	0.03876
cluster	12	GO:0032465	regulation of cytokinesis	55	3	0.75	0.03892
cluster	12	GO:0042552	myelination	55	3	0.75	0.03892
cluster	12	GO:0042886	amide transport	749	19	10.22	0.03924
cluster	12	GO:0006955	immune response	676	23	9.22	0.03943
cluster	12	GO:0006954	inflammatory response	283	8	3.86	0.03956
cluster	12	GO:0051094	positive regulation of developmental process	627	19	8.55	0.04017
cluster	12	GO:0030900	forebrain development	138	5	1.88	0.04027
cluster	12	GO:0021537	telencephalon development	95	4	1.3	0.04067
cluster	12	GO:1902850	microtubule cytoskeleton organization involved in mitosis	95	4	1.3	0.04067
cluster	12	GO:2001235	positive regulation of apoptotic signaling pathway	95	4	1.3	0.04067
cluster	12	GO:0007266	Rho protein signal transduction	56	3	0.76	0.04072
cluster	12	GO:1905477	positive regulation of protein localization to membrane	56	3	0.76	0.04072
cluster	12	GO:0034620	cellular response to unfolded protein	56	3	0.76	0.04072
cluster	12	GO:0007009	plasma membrane organization	56	3	0.76	0.04072
cluster	12	GO:0051051	negative regulation of transport	185	6	2.52	0.04078
cluster	12	GO:0030217	T cell differentiation	165	10	2.25	0.04138
cluster	12	GO:0070232	regulation of T cell apoptotic process	24	2	0.33	0.04191
cluster	12	GO:0048255	mRNA stabilization	24	2	0.33	0.04191
cluster	12	GO:0070849	response to epidermal growth factor	24	2	0.33	0.04191
cluster	12	GO:0007422	peripheral nervous system development	24	2	0.33	0.04191
cluster	12	GO:0007272	ensheathment of neurons	57	3	0.78	0.04257
cluster	12	GO:0008366	axon ensheathment	57	3	0.78	0.04257
cluster	12	GO:0072089	stem cell proliferation	57	3	0.78	0.04257
cluster	12	GO:0051224	negative regulation of protein transport	57	3	0.78	0.04257
cluster	12	GO:0002253	activation of immune response	150	7	2.05	0.04331
cluster	12	GO:0002685	regulation of leukocyte migration	110	6	1.5	0.04411
cluster	12	GO:0045892	negative regulation of transcription, DNA-templated	623	14	8.5	0.04411
cluster	12	GO:0050871	positive regulation of B cell activation	58	3	0.79	0.04446
cluster	12	GO:0006357	regulation of transcription by RNA polymerase II	1008	22	13.75	0.04474
cluster	12	GO:0015931	nucleobase-containing compound transport	98	4	1.34	0.04476
cluster	12	GO:0071675	regulation of mononuclear cell migration	25	2	0.34	0.04516
cluster	12	GO:0042490	mechanoreceptor differentiation	25	2	0.34	0.04516
cluster	12	GO:0051591	response to cAMP	25	2	0.34	0.04516
cluster	12	GO:0006911	phagocytosis, engulfment	25	2	0.34	0.04516
cluster	12	GO:0045747	positive regulation of Notch signaling pathway	25	2	0.34	0.04516
cluster	12	GO:1902895	positive regulation of pri-miRNA transcription by RNA polymerase II	25	2	0.34	0.04516
cluster	12	GO:0006721	terpenoid metabolic process	25	2	0.34	0.04516
cluster	12	GO:0050727	regulation of inflammatory response	190	6	2.59	0.04544
cluster	12	GO:0051240	positive regulation of multicellular organismal process	818	29	11.16	0.04555
cluster	12	GO:0002793	positive regulation of peptide secretion	59	3	0.8	0.04639
cluster	12	GO:0071456	cellular response to hypoxia	59	3	0.8	0.04639
cluster	12	GO:0036294	cellular response to decreased oxygen levels	59	3	0.8	0.04639
cluster	12	GO:0001775	cell activation	517	30	7.05	0.04653
cluster	12	GO:0006959	humoral immune response	74	7	1.01	0.04666
cluster	12	GO:0006066	alcohol metabolic process	144	5	1.96	0.04691
cluster	12	GO:0043618	regulation of transcription from RNA polymerase II promoter in response to stress	33	4	0.45	0.04718
cluster	12	GO:0042110	T cell activation	274	18	3.74	0.04727
cluster	12	GO:0042326	negative regulation of phosphorylation	252	9	3.44	0.04766
cluster	12	GO:0051338	regulation of transferase activity	452	17	6.17	0.04779
cluster	12	GO:0046903	secretion	362	12	4.94	0.04783
cluster	12	GO:1904950	negative regulation of establishment of protein localization	60	3	0.82	0.04836
cluster	12	GO:0003206	cardiac chamber morphogenesis	60	3	0.82	0.04836
cluster	12	GO:0061005	cell differentiation involved in kidney development	26	2	0.35	0.0485
cluster	12	GO:0050856	regulation of T cell receptor signaling pathway	26	2	0.35	0.0485
cluster	12	GO:0043616	keratinocyte proliferation	26	2	0.35	0.0485
cluster	12	GO:0003143	embryonic heart tube morphogenesis	26	2	0.35	0.0485
cluster	12	GO:0045668	negative regulation of osteoblast differentiation	26	2	0.35	0.0485
cluster	12	GO:0061756	leukocyte adhesion to vascular endothelial cell	26	2	0.35	0.0485
cluster	12	GO:0010632	regulation of epithelial cell migration	123	8	1.68	0.04889
cluster	46	GO:0008608	attachment of spindle microtubules to kinetochore	24	11	0.88	0.0001
cluster	46	GO:0000070	mitotic sister chromatid segregation	108	33	3.96	0.00014
cluster	46	GO:0007094	mitotic spindle assembly checkpoint	28	8	1.03	0.00019
cluster	46	GO:0042775	mitochondrial ATP synthesis coupled electron transport	32	12	1.17	0.00029
cluster	46	GO:0022900	electron transport chain	59	18	2.16	0.0003
cluster	46	GO:0045070	positive regulation of viral genome replication	28	6	1.03	0.00044
cluster	46	GO:0009176	pyrimidine deoxyribonucleoside monophosphate metabolic process	5	3	0.18	0.00046
cluster	46	GO:0051255	spindle midzone assembly	5	3	0.18	0.00046
cluster	46	GO:0007052	mitotic spindle organization	78	20	2.86	0.00054
cluster	46	GO:0006165	nucleoside diphosphate phosphorylation	65	9	2.38	0.00056
cluster	46	GO:0006259	DNA metabolic process	519	52	19.03	0.0006
cluster	46	GO:1901989	positive regulation of cell cycle phase transition	60	11	2.2	0.00061
cluster	46	GO:0007064	mitotic sister chromatid cohesion	20	5	0.73	0.00063
cluster	46	GO:0051988	regulation of attachment of spindle microtubules to kinetochore	12	4	0.44	0.0007
cluster	46	GO:0035404	histone-serine phosphorylation	6	3	0.22	0.0009
cluster	46	GO:0006268	DNA unwinding involved in DNA replication	6	3	0.22	0.0009
cluster	46	GO:0015986	ATP synthesis coupled proton transport	21	7	0.77	0.00095
cluster	46	GO:1904666	regulation of ubiquitin protein ligase activity	13	4	0.48	0.00098
cluster	46	GO:0000398	mRNA splicing, via spliceosome	181	22	6.64	0.00118
cluster	46	GO:0040001	establishment of mitotic spindle localization	23	5	0.84	0.00126
cluster	46	GO:0045841	negative regulation of mitotic metaphase/anaphase transition	30	10	1.1	0.00129
cluster	46	GO:0009219	pyrimidine deoxyribonucleotide metabolic process	7	3	0.26	0.00153
cluster	46	GO:0007096	regulation of exit from mitosis	7	3	0.26	0.00153
cluster	46	GO:0000212	meiotic spindle organization	7	3	0.26	0.00153
cluster	46	GO:0045840	positive regulation of mitotic nuclear division	26	5	0.95	0.00224
cluster	46	GO:0006221	pyrimidine nucleotide biosynthetic process	16	4	0.59	0.00228
cluster	46	GO:0050821	protein stabilization	110	11	4.03	0.00228
cluster	46	GO:0046602	regulation of mitotic centrosome separation	8	3	0.29	0.00239
cluster	46	GO:0009263	deoxyribonucleotide biosynthetic process	8	3	0.29	0.00239
cluster	46	GO:0042776	mitochondrial ATP synthesis coupled proton transport	8	3	0.29	0.00239
cluster	46	GO:1901998	toxin transport	27	5	0.99	0.00267
cluster	46	GO:0046039	GTP metabolic process	17	4	0.62	0.00289
cluster	46	GO:0044786	cell cycle DNA replication	17	4	0.62	0.00289
cluster	46	GO:0051321	meiotic cell cycle	88	17	3.23	0.00325
cluster	46	GO:0046031	ADP metabolic process	54	7	1.98	0.00337
cluster	46	GO:0051702	interaction with symbiont	54	7	1.98	0.00337
cluster	46	GO:0046051	UTP metabolic process	9	3	0.33	0.00348
cluster	46	GO:0045132	meiotic chromosome segregation	41	6	1.5	0.00353
cluster	46	GO:0009124	nucleoside monophosphate biosynthetic process	18	4	0.66	0.00361
cluster	46	GO:0051973	positive regulation of telomerase activity	29	5	1.06	0.0037
cluster	46	GO:0032506	cytokinetic process	29	5	1.06	0.0037
cluster	46	GO:0007163	establishment or maintenance of cell polarity	101	10	3.7	0.00383
cluster	46	GO:0032508	DNA duplex unwinding	25	7	0.92	0.00432
cluster	46	GO:0010971	positive regulation of G2/M transition of mitotic cell cycle	19	4	0.7	0.00445
cluster	46	GO:0006403	RNA localization	88	9	3.23	0.00481
cluster	46	GO:0031145	anaphase-promoting complex-dependent catabolic process	10	3	0.37	0.00484
cluster	46	GO:0051261	protein depolymerization	58	7	2.13	0.00505
cluster	46	GO:0034655	nucleobase-containing compound catabolic process	214	16	7.85	0.00537
cluster	46	GO:1903580	positive regulation of ATP metabolic process	20	4	0.73	0.0054
cluster	46	GO:0006298	mismatch repair	20	4	0.73	0.0054
cluster	46	GO:0007018	microtubule-based movement	143	12	5.24	0.00623
cluster	46	GO:0007127	meiosis I	46	6	1.69	0.00632
cluster	46	GO:0044772	mitotic cell cycle phase transition	220	28	8.07	0.00636
cluster	46	GO:0006336	DNA replication-independent nucleosome assembly	11	3	0.4	0.00648
cluster	46	GO:0098761	cellular response to interleukin-7	11	3	0.4	0.00648
cluster	46	GO:0071353	cellular response to interleukin-4	21	4	0.77	0.00648
cluster	46	GO:1902749	regulation of cell cycle G2/M phase transition	66	10	2.42	0.0067
cluster	46	GO:0071459	protein localization to chromosome, centromeric region	18	8	0.66	0.00742
cluster	46	GO:0000413	protein peptidyl-prolyl isomerization	22	4	0.81	0.0077
cluster	46	GO:0034728	nucleosome organization	60	9	2.2	0.0083
cluster	46	GO:0090266	regulation of mitotic cell cycle spindle assembly checkpoint	12	3	0.44	0.0084
cluster	46	GO:0046129	purine ribonucleoside biosynthetic process	12	3	0.44	0.0084
cluster	46	GO:0015931	nucleobase-containing compound transport	98	9	3.59	0.00965
cluster	46	GO:0007019	microtubule depolymerization	24	4	0.88	0.01056
cluster	46	GO:1904355	positive regulation of telomere capping	13	3	0.48	0.01063
cluster	46	GO:0044827	modulation by host of viral genome replication	13	3	0.48	0.01063
cluster	46	GO:0007346	regulation of mitotic cell cycle	278	32	10.2	0.01094
cluster	46	GO:0006757	ATP generation from ADP	52	6	1.91	0.01144
cluster	46	GO:0006096	glycolytic process	52	6	1.91	0.01144
cluster	46	GO:0022904	respiratory electron transport chain	46	15	1.69	0.01205
cluster	46	GO:0006323	DNA packaging	93	17	3.41	0.01205
cluster	46	GO:0034622	cellular protein-containing complex assembly	506	50	18.56	0.01216
cluster	46	GO:0009123	nucleoside monophosphate metabolic process	26	7	0.95	0.01216
cluster	46	GO:0010992	ubiquitin recycling	5	2	0.18	0.01246
cluster	46	GO:1905462	regulation of DNA duplex unwinding	5	2	0.18	0.01246
cluster	46	GO:1905448	positive regulation of mitochondrial ATP synthesis coupled electron transport	5	2	0.18	0.01246
cluster	46	GO:0044359	modulation of molecular function in other organism	5	2	0.18	0.01246
cluster	46	GO:0052428	modulation by host of symbiont molecular function	5	2	0.18	0.01246
cluster	46	GO:0010216	maintenance of DNA methylation	5	2	0.18	0.01246
cluster	46	GO:0009265	2'-deoxyribonucleotide biosynthetic process	5	2	0.18	0.01246
cluster	46	GO:0009223	pyrimidine deoxyribonucleotide catabolic process	5	2	0.18	0.01246
cluster	46	GO:0085020	protein K6-linked ubiquitination	5	2	0.18	0.01246
cluster	46	GO:0052205	modulation of molecular function in other organism involved in symbiotic interaction	5	2	0.18	0.01246
cluster	46	GO:0046385	deoxyribose phosphate biosynthetic process	5	2	0.18	0.01246
cluster	46	GO:0015866	ADP transport	5	2	0.18	0.01246
cluster	46	GO:0032075	positive regulation of nuclease activity	5	2	0.18	0.01246
cluster	46	GO:0015074	DNA integration	5	2	0.18	0.01246
cluster	46	GO:0090666	scaRNA localization to Cajal body	5	2	0.18	0.01246
cluster	46	GO:0050657	nucleic acid transport	69	7	2.53	0.01288
cluster	46	GO:0050658	RNA transport	69	7	2.53	0.01288
cluster	46	GO:0031109	microtubule polymerization or depolymerization	69	7	2.53	0.01288
cluster	46	GO:0033260	nuclear DNA replication	14	3	0.51	0.01317
cluster	46	GO:0040020	regulation of meiotic nuclear division	14	3	0.51	0.01317
cluster	46	GO:0032069	regulation of nuclease activity	14	3	0.51	0.01317
cluster	46	GO:0006401	RNA catabolic process	158	12	5.79	0.01329
cluster	46	GO:1901990	regulation of mitotic cell cycle phase transition	160	24	5.87	0.01378
cluster	46	GO:0051236	establishment of RNA localization	71	7	2.6	0.01492
cluster	46	GO:1901992	positive regulation of mitotic cell cycle phase transition	46	8	1.69	0.01548
cluster	46	GO:1990542	mitochondrial transmembrane transport	49	8	1.8	0.01582
cluster	46	GO:0046034	ATP metabolic process	144	28	5.28	0.01586
cluster	46	GO:0007059	chromosome segregation	205	43	7.52	0.0159
cluster	46	GO:0061077	chaperone-mediated protein folding	27	4	0.99	0.016
cluster	46	GO:0009167	purine ribonucleoside monophosphate metabolic process	15	3	0.55	0.01602
cluster	46	GO:0009126	purine nucleoside monophosphate metabolic process	15	3	0.55	0.01602
cluster	46	GO:0048024	regulation of mRNA splicing, via spliceosome	57	6	2.09	0.01751
cluster	46	GO:0030261	chromosome condensation	18	9	0.66	0.01757
cluster	46	GO:1902751	positive regulation of cell cycle G2/M phase transition	25	6	0.92	0.0179
cluster	46	GO:1904668	positive regulation of ubiquitin protein ligase activity	6	2	0.22	0.01824
cluster	46	GO:0000054	ribosomal subunit export from nucleus	6	2	0.22	0.01824
cluster	46	GO:0000055	ribosomal large subunit export from nucleus	6	2	0.22	0.01824
cluster	46	GO:1905446	regulation of mitochondrial ATP synthesis coupled electron transport	6	2	0.22	0.01824
cluster	46	GO:0007202	activation of phospholipase C activity	6	2	0.22	0.01824
cluster	46	GO:0033750	ribosome localization	6	2	0.22	0.01824
cluster	46	GO:0006335	DNA replication-dependent nucleosome assembly	6	2	0.22	0.01824
cluster	46	GO:0009158	ribonucleoside monophosphate catabolic process	6	2	0.22	0.01824
cluster	46	GO:0010755	regulation of plasminogen activation	6	2	0.22	0.01824
cluster	46	GO:0070601	centromeric sister chromatid cohesion	6	2	0.22	0.01824
cluster	46	GO:0042744	hydrogen peroxide catabolic process	6	2	0.22	0.01824
cluster	46	GO:0071428	rRNA-containing ribonucleoprotein complex export from nucleus	6	2	0.22	0.01824
cluster	46	GO:0051987	positive regulation of attachment of spindle microtubules to kinetochore	6	2	0.22	0.01824
cluster	46	GO:0034723	DNA replication-dependent nucleosome organization	6	2	0.22	0.01824
cluster	46	GO:0051791	medium-chain fatty acid metabolic process	6	2	0.22	0.01824
cluster	46	GO:0051817	modulation of process of other organism involved in symbiotic interaction	58	6	2.13	0.01895
cluster	46	GO:0034644	cellular response to UV	58	6	2.13	0.01895
cluster	46	GO:0097345	mitochondrial outer membrane permeabilization	16	3	0.59	0.01919
cluster	46	GO:0006260	DNA replication	137	23	5.02	0.01957
cluster	46	GO:0051851	modulation by host of symbiont process	43	5	1.58	0.01978
cluster	46	GO:0009152	purine ribonucleotide biosynthetic process	81	13	2.97	0.02033
cluster	46	GO:0009206	purine ribonucleoside triphosphate biosynthetic process	38	10	1.39	0.02159
cluster	46	GO:0071426	ribonucleoprotein complex export from nucleus	44	5	1.61	0.02166
cluster	46	GO:0071482	cellular response to light stimulus	60	6	2.2	0.02207
cluster	46	GO:0035821	modulation of process of other organism	60	6	2.2	0.02207
cluster	46	GO:0007143	female meiotic nuclear division	17	3	0.62	0.02269
cluster	46	GO:1902110	positive regulation of mitochondrial membrane permeability involved in apoptotic process	17	3	0.62	0.02269
cluster	46	GO:0007063	regulation of sister chromatid cohesion	17	3	0.62	0.02269
cluster	46	GO:0017038	protein import	113	9	4.14	0.02278
cluster	46	GO:0007005	mitochondrion organization	284	26	10.42	0.02312
cluster	46	GO:0071166	ribonucleoprotein complex localization	45	5	1.65	0.02366
cluster	46	GO:0051653	spindle localization	30	7	1.1	0.02434
cluster	46	GO:1904667	negative regulation of ubiquitin protein ligase activity	7	2	0.26	0.02492
cluster	46	GO:0007144	female meiosis I	7	2	0.26	0.02492
cluster	46	GO:1903862	positive regulation of oxidative phosphorylation	7	2	0.26	0.02492
cluster	46	GO:0009125	nucleoside monophosphate catabolic process	7	2	0.26	0.02492
cluster	46	GO:0006183	GTP biosynthetic process	7	2	0.26	0.02492
cluster	46	GO:0006228	UTP biosynthetic process	7	2	0.26	0.02492
cluster	46	GO:0006244	pyrimidine nucleotide catabolic process	7	2	0.26	0.02492
cluster	46	GO:0090267	positive regulation of mitotic cell cycle spindle assembly checkpoint	7	2	0.26	0.02492
cluster	46	GO:0090232	positive regulation of spindle checkpoint	7	2	0.26	0.02492
cluster	46	GO:0043486	histone exchange	7	2	0.26	0.02492
cluster	46	GO:0044829	positive regulation by host of viral genome replication	7	2	0.26	0.02492
cluster	46	GO:1904872	regulation of telomerase RNA localization to Cajal body	7	2	0.26	0.02492
cluster	46	GO:0009145	purine nucleoside triphosphate biosynthetic process	39	10	1.43	0.02524
cluster	46	GO:0009260	ribonucleotide biosynthetic process	84	13	3.08	0.02524
cluster	46	GO:0000280	nuclear division	232	51	8.51	0.02525
cluster	46	GO:0071478	cellular response to radiation	97	8	3.56	0.02573
cluster	46	GO:0007051	spindle organization	119	26	4.36	0.0261
cluster	46	GO:0032467	positive regulation of cytokinesis	18	3	0.66	0.0265
cluster	46	GO:1904353	regulation of telomere capping	18	3	0.66	0.0265
cluster	46	GO:0046390	ribose phosphate biosynthetic process	85	13	3.12	0.02704
cluster	46	GO:0006090	pyruvate metabolic process	63	6	2.31	0.02736
cluster	46	GO:0010389	regulation of G2/M transition of mitotic cell cycle	51	8	1.87	0.02755
cluster	46	GO:0065004	protein-DNA complex assembly	72	13	2.64	0.02802
cluster	46	GO:0009166	nucleotide catabolic process	32	4	1.17	0.02844
cluster	46	GO:0070192	chromosome organization involved in meiotic cell cycle	32	4	1.17	0.02844
cluster	46	GO:0009411	response to UV	99	8	3.63	0.02864
cluster	46	GO:0009201	ribonucleoside triphosphate biosynthetic process	40	10	1.47	0.02919
cluster	46	GO:0090068	positive regulation of cell cycle process	144	19	5.28	0.02934
cluster	46	GO:1902410	mitotic cytokinetic process	19	3	0.7	0.03063
cluster	46	GO:0039694	viral RNA genome replication	19	3	0.7	0.03063
cluster	46	GO:1902108	regulation of mitochondrial membrane permeability involved in apoptotic process	19	3	0.7	0.03063
cluster	46	GO:1902686	mitochondrial outer membrane permeabilization involved in programmed cell death	19	3	0.7	0.03063
cluster	46	GO:0006334	nucleosome assembly	44	7	1.61	0.03069
cluster	46	GO:0061640	cytoskeleton-dependent cytokinesis	55	11	2.02	0.03113
cluster	46	GO:0043388	positive regulation of DNA binding	33	4	1.21	0.03145
cluster	46	GO:0006606	protein import into nucleus	83	7	3.04	0.03222
cluster	46	GO:1901070	guanosine-containing compound biosynthetic process	8	2	0.29	0.03243
cluster	46	GO:0140374	antiviral innate immune response	8	2	0.29	0.03243
cluster	46	GO:0039692	single stranded viral RNA replication via double stranded DNA intermediate	8	2	0.29	0.03243
cluster	46	GO:0046653	tetrahydrofolate metabolic process	8	2	0.29	0.03243
cluster	46	GO:0046040	IMP metabolic process	8	2	0.29	0.03243
cluster	46	GO:0015867	ATP transport	8	2	0.29	0.03243
cluster	46	GO:0042026	protein refolding	8	2	0.29	0.03243
cluster	46	GO:0032070	regulation of deoxyribonuclease activity	8	2	0.29	0.03243
cluster	46	GO:0090685	RNA localization to nucleus	8	2	0.29	0.03243
cluster	46	GO:0090670	RNA localization to Cajal body	8	2	0.29	0.03243
cluster	46	GO:0090671	telomerase RNA localization to Cajal body	8	2	0.29	0.03243
cluster	46	GO:0090672	telomerase RNA localization	8	2	0.29	0.03243
cluster	46	GO:0006839	mitochondrial transport	111	11	4.07	0.03372
cluster	46	GO:0140014	mitotic nuclear division	173	44	6.34	0.03375
cluster	46	GO:0009161	ribonucleoside monophosphate metabolic process	20	3	0.73	0.03509
cluster	46	GO:0009154	purine ribonucleotide catabolic process	20	3	0.73	0.03509
cluster	46	GO:0035794	positive regulation of mitochondrial membrane permeability	20	3	0.73	0.03509
cluster	46	GO:0071168	protein localization to chromatin	20	3	0.73	0.03509
cluster	46	GO:0000132	establishment of mitotic spindle orientation	20	3	0.73	0.03509
cluster	46	GO:0051445	regulation of meiotic cell cycle	20	3	0.73	0.03509
cluster	46	GO:0044788	modulation by host of viral process	20	3	0.73	0.03509
cluster	46	GO:0042752	regulation of circadian rhythm	50	5	1.83	0.03543
cluster	46	GO:0051099	positive regulation of binding	104	8	3.81	0.0369
cluster	46	GO:0006164	purine nucleotide biosynthetic process	90	13	3.3	0.03731
cluster	46	GO:0051983	regulation of chromosome segregation	75	16	2.75	0.03764
cluster	46	GO:0051170	import into nucleus	86	7	3.15	0.03804
cluster	46	GO:0031110	regulation of microtubule polymerization or depolymerization	51	5	1.87	0.03815
cluster	46	GO:0044265	cellular macromolecule catabolic process	623	34	22.85	0.03826
cluster	46	GO:0097435	supramolecular fiber organization	357	20	13.09	0.03898
cluster	46	GO:0000086	G2/M transition of mitotic cell cycle	71	9	2.6	0.03954
cluster	46	GO:1905710	positive regulation of membrane permeability	21	3	0.77	0.03985
cluster	46	GO:0000423	mitophagy	21	3	0.77	0.03985
cluster	46	GO:0070979	protein K11-linked ubiquitination	21	3	0.77	0.03985
cluster	46	GO:0051294	establishment of spindle orientation	21	3	0.77	0.03985
cluster	46	GO:0051781	positive regulation of cell division	21	3	0.77	0.03985
cluster	46	GO:0010954	positive regulation of protein processing	9	2	0.33	0.0407
cluster	46	GO:1901679	nucleotide transmembrane transport	9	2	0.33	0.0407
cluster	46	GO:0051095	regulation of helicase activity	9	2	0.33	0.0407
cluster	46	GO:2000104	negative regulation of DNA-dependent DNA replication	9	2	0.33	0.0407
cluster	46	GO:0009148	pyrimidine nucleoside triphosphate biosynthetic process	9	2	0.33	0.0407
cluster	46	GO:0009209	pyrimidine ribonucleoside triphosphate biosynthetic process	9	2	0.33	0.0407
cluster	46	GO:0006241	CTP biosynthetic process	9	2	0.33	0.0407
cluster	46	GO:0010863	positive regulation of phospholipase C activity	9	2	0.33	0.0407
cluster	46	GO:0072530	purine-containing compound transmembrane transport	9	2	0.33	0.0407
cluster	46	GO:0006662	glycerol ether metabolic process	9	2	0.33	0.0407
cluster	46	GO:1901857	positive regulation of cellular respiration	9	2	0.33	0.0407
cluster	46	GO:0006405	RNA export from nucleus	52	5	1.91	0.04099
cluster	46	GO:0006289	nucleotide-excision repair	36	4	1.32	0.04159
cluster	46	GO:0006275	regulation of DNA replication	60	10	2.2	0.04176
cluster	46	GO:0006091	generation of precursor metabolites and energy	222	31	8.14	0.04278
cluster	46	GO:0051098	regulation of binding	209	13	7.66	0.04382
cluster	46	GO:0048146	positive regulation of fibroblast proliferation	22	3	0.81	0.04493
cluster	46	GO:0006195	purine nucleotide catabolic process	22	3	0.81	0.04493
cluster	46	GO:0051984	positive regulation of chromosome segregation	22	3	0.81	0.04493
cluster	46	GO:0051225	spindle assembly	73	17	2.68	0.0459
cluster	46	GO:0009057	macromolecule catabolic process	729	38	26.73	0.04606
cluster	46	GO:1903046	meiotic cell cycle process	82	15	3.01	0.04672
cluster	46	GO:0033108	mitochondrial respiratory chain complex assembly	69	14	2.53	0.04692
cluster	46	GO:0034502	protein localization to chromosome	66	17	2.42	0.04779
cluster	46	GO:0043467	regulation of generation of precursor metabolites and energy	72	6	2.64	0.04802
cluster	46	GO:1900274	regulation of phospholipase C activity	10	2	0.37	0.04967
cluster	46	GO:0010457	centriole-centriole cohesion	10	2	0.37	0.04967
cluster	46	GO:0051573	negative regulation of histone H3-K9 methylation	10	2	0.37	0.04967
cluster	46	GO:0010155	regulation of proton transport	10	2	0.37	0.04967
cluster	46	GO:0031639	plasminogen activation	10	2	0.37	0.04967
cluster	46	GO:0043558	regulation of translational initiation in response to stress	10	2	0.37	0.04967
cluster	46	GO:0046607	positive regulation of centrosome cycle	10	2	0.37	0.04967
cluster	46	GO:0009220	pyrimidine ribonucleotide biosynthetic process	10	2	0.37	0.04967
cluster	46	GO:1901978	positive regulation of cell cycle checkpoint	10	2	0.37	0.04967
cluster	46	GO:0046386	deoxyribose phosphate catabolic process	10	2	0.37	0.04967
cluster	46	GO:0006760	folic acid-containing compound metabolic process	10	2	0.37	0.04967
cluster	46	GO:0150105	protein localization to cell-cell junction	10	2	0.37	0.04967
cluster	46	GO:0006734	NADH metabolic process	10	2	0.37	0.04967
cluster	46	GO:1903319	positive regulation of protein maturation	10	2	0.37	0.04967
cluster	46	GO:0030901	midbrain development	10	2	0.37	0.04967
topic	k1	GO:0006412	translation	433	58	6.85	< 1e-30
topic	k1	GO:0032729	positive regulation of interferon-gamma production	50	6	0.79	0.00013
topic	k1	GO:0042274	ribosomal small subunit biogenesis	22	4	0.35	0.00035
topic	k1	GO:1901798	positive regulation of signal transduction by p53 class mediator	10	3	0.16	0.00043
topic	k1	GO:0006954	inflammatory response	283	12	4.48	0.00174
topic	k1	GO:0009617	response to bacterium	246	11	3.89	0.00178
topic	k1	GO:0002683	negative regulation of immune system process	256	13	4.05	0.00307
topic	k1	GO:0030217	T cell differentiation	165	11	2.61	0.00318
topic	k1	GO:0006919	activation of cysteine-type endopeptidase activity involved in apoptotic process	39	4	0.62	0.00322
topic	k1	GO:0042093	T-helper cell differentiation	40	4	0.63	0.00353
topic	k1	GO:1902231	positive regulation of intrinsic apoptotic signaling pathway in response to DNA damage	6	2	0.09	0.00358
topic	k1	GO:0070301	cellular response to hydrogen peroxide	41	4	0.65	0.00387
topic	k1	GO:0002684	positive regulation of immune system process	482	18	7.63	0.00474
topic	k1	GO:0033120	positive regulation of RNA splicing	22	3	0.35	0.0048
topic	k1	GO:0002335	mature B cell differentiation	23	3	0.36	0.00545
topic	k1	GO:0043030	regulation of macrophage activation	23	3	0.36	0.00545
topic	k1	GO:1900103	positive regulation of endoplasmic reticulum unfolded protein response	8	2	0.13	0.00654
topic	k1	GO:0002250	adaptive immune response	178	8	2.82	0.00723
topic	k1	GO:0032103	positive regulation of response to external stimulus	217	9	3.43	0.00747
topic	k1	GO:0097193	intrinsic apoptotic signaling pathway	188	10	2.98	0.00761
topic	k1	GO:0002686	negative regulation of leukocyte migration	26	3	0.41	0.00773
topic	k1	GO:0050856	regulation of T cell receptor signaling pathway	26	3	0.41	0.00773
topic	k1	GO:0031349	positive regulation of defense response	145	7	2.29	0.0081
topic	k1	GO:0072574	hepatocyte proliferation	9	2	0.14	0.00833
topic	k1	GO:0050900	leukocyte migration	179	10	2.83	0.00975
topic	k1	GO:0050776	regulation of immune response	384	15	6.08	0.00977
topic	k1	GO:2000402	negative regulation of lymphocyte migration	10	2	0.16	0.0103
topic	k1	GO:0032691	negative regulation of interleukin-1 beta production	10	2	0.16	0.0103
topic	k1	GO:0032231	regulation of actin filament bundle assembly	54	4	0.85	0.01032
topic	k1	GO:1903706	regulation of hemopoiesis	234	9	3.7	0.01191
topic	k1	GO:0043032	positive regulation of macrophage activation	11	2	0.17	0.01246
topic	k1	GO:0032692	negative regulation of interleukin-1 production	11	2	0.17	0.01246
topic	k1	GO:0050862	positive regulation of T cell receptor signaling pathway	11	2	0.17	0.01246
topic	k1	GO:0051900	regulation of mitochondrial depolarization	11	2	0.17	0.01246
topic	k1	GO:0001836	release of cytochrome c from mitochondria	31	3	0.49	0.01262
topic	k1	GO:0002460	adaptive immune response based on somatic recombination of immune receptors built from immunoglobulin superfamily domains	159	7	2.52	0.01304
topic	k1	GO:0042742	defense response to bacterium	90	5	1.42	0.0139
topic	k1	GO:0050777	negative regulation of immune response	90	5	1.42	0.0139
topic	k1	GO:0010951	negative regulation of endopeptidase activity	59	4	0.93	0.01398
topic	k1	GO:0032496	response to lipopolysaccharide	125	6	1.98	0.01427
topic	k1	GO:0034260	negative regulation of GTPase activity	12	2	0.19	0.0148
topic	k1	GO:0002456	T cell mediated immunity	60	4	0.95	0.0148
topic	k1	GO:0007159	leukocyte cell-cell adhesion	202	8	3.2	0.0148
topic	k1	GO:0031529	ruffle organization	33	3	0.52	0.01497
topic	k1	GO:1902105	regulation of leukocyte differentiation	168	7	2.66	0.01719
topic	k1	GO:0051882	mitochondrial depolarization	13	2	0.21	0.01731
topic	k1	GO:0001909	leukocyte mediated cytotoxicity	63	4	1	0.01743
topic	k1	GO:0072676	lymphocyte migration	63	4	1	0.01743
topic	k1	GO:0001817	regulation of cytokine production	399	17	6.31	0.01758
topic	k1	GO:0001819	positive regulation of cytokine production	268	14	4.24	0.01832
topic	k1	GO:0001816	cytokine production	404	17	6.39	0.01933
topic	k1	GO:0010466	negative regulation of peptidase activity	65	4	1.03	0.01934
topic	k1	GO:0072593	reactive oxygen species metabolic process	134	6	2.12	0.01947
topic	k1	GO:0002237	response to molecule of bacterial origin	134	6	2.12	0.01947
topic	k1	GO:0051249	regulation of lymphocyte activation	255	9	4.04	0.01983
topic	k1	GO:0019369	arachidonic acid metabolic process	14	2	0.22	0.01998
topic	k1	GO:0050729	positive regulation of inflammatory response	66	4	1.04	0.02035
topic	k1	GO:0034612	response to tumor necrosis factor	100	5	1.58	0.02102
topic	k1	GO:0032663	regulation of interleukin-2 production	38	3	0.6	0.02187
topic	k1	GO:0032623	interleukin-2 production	38	3	0.6	0.02187
topic	k1	GO:0098609	cell-cell adhesion	348	11	5.51	0.02206
topic	k1	GO:1900027	regulation of ruffle assembly	15	2	0.24	0.02282
topic	k1	GO:0003254	regulation of membrane depolarization	15	2	0.24	0.02282
topic	k1	GO:1903037	regulation of leukocyte cell-cell adhesion	179	7	2.83	0.02344
topic	k1	GO:0022408	negative regulation of cell-cell adhesion	103	5	1.63	0.02355
topic	k1	GO:0002706	regulation of lymphocyte mediated immunity	103	5	1.63	0.02355
topic	k1	GO:0002822	regulation of adaptive immune response based on somatic recombination of immune receptors built from immunoglobulin superfamily domains	103	5	1.63	0.02355
topic	k1	GO:0008585	female gonad development	40	3	0.63	0.02503
topic	k1	GO:0001910	regulation of leukocyte mediated cytotoxicity	40	3	0.63	0.02503
topic	k1	GO:0006935	chemotaxis	224	8	3.55	0.02575
topic	k1	GO:0051241	negative regulation of multicellular organismal process	546	15	8.64	0.02576
topic	k1	GO:0002507	tolerance induction	16	2	0.25	0.02582
topic	k1	GO:0036314	response to sterol	16	2	0.25	0.02582
topic	k1	GO:0002825	regulation of T-helper 1 type immune response	16	2	0.25	0.02582
topic	k1	GO:0050857	positive regulation of antigen receptor-mediated signaling pathway	16	2	0.25	0.02582
topic	k1	GO:0002694	regulation of leukocyte activation	296	12	4.68	0.02632
topic	k1	GO:0042330	taxis	225	8	3.56	0.02635
topic	k1	GO:0007162	negative regulation of cell adhesion	144	6	2.28	0.02663
topic	k1	GO:0046545	development of primary female sexual characteristics	41	3	0.65	0.0267
topic	k1	GO:0030595	leukocyte chemotaxis	107	5	1.69	0.02721
topic	k1	GO:0052548	regulation of endopeptidase activity	149	9	2.36	0.02762
topic	k1	GO:0048660	regulation of smooth muscle cell proliferation	42	3	0.66	0.02843
topic	k1	GO:1902042	negative regulation of extrinsic apoptotic signaling pathway via death domain receptors	17	2	0.27	0.02896
topic	k1	GO:0045619	regulation of lymphocyte differentiation	109	5	1.73	0.02917
topic	k1	GO:1903038	negative regulation of leukocyte cell-cell adhesion	74	4	1.17	0.02951
topic	k1	GO:0048659	smooth muscle cell proliferation	43	3	0.68	0.03022
topic	k1	GO:0051346	negative regulation of hydrolase activity	149	6	2.36	0.03079
topic	k1	GO:0002708	positive regulation of lymphocyte mediated immunity	75	4	1.19	0.0308
topic	k1	GO:0050727	regulation of inflammatory response	190	7	3.01	0.0311
topic	k1	GO:0022407	regulation of cell-cell adhesion	233	8	3.69	0.03154
topic	k1	GO:0002449	lymphocyte mediated immunity	150	6	2.37	0.03167
topic	k1	GO:0046660	female sex differentiation	44	3	0.7	0.03207
topic	k1	GO:0002313	mature B cell differentiation involved in immune response	18	2	0.28	0.03225
topic	k1	GO:0002347	response to tumor cell	18	2	0.28	0.03225
topic	k1	GO:1990874	vascular smooth muscle cell proliferation	18	2	0.28	0.03225
topic	k1	GO:0045954	positive regulation of natural killer cell mediated cytotoxicity	18	2	0.28	0.03225
topic	k1	GO:1904705	regulation of vascular smooth muscle cell proliferation	18	2	0.28	0.03225
topic	k1	GO:0002726	positive regulation of T cell cytokine production	18	2	0.28	0.03225
topic	k1	GO:0002717	positive regulation of natural killer cell mediated immunity	18	2	0.28	0.03225
topic	k1	GO:0002819	regulation of adaptive immune response	112	5	1.77	0.03228
topic	k1	GO:0001906	cell killing	77	4	1.22	0.03348
topic	k1	GO:0050728	negative regulation of inflammatory response	78	4	1.23	0.03487
topic	k1	GO:0050865	regulation of cell activation	311	12	4.92	0.03536
topic	k1	GO:0098542	defense response to other organism	375	11	5.93	0.03546
topic	k1	GO:0051899	membrane depolarization	19	2	0.3	0.03567
topic	k1	GO:0008625	extrinsic apoptotic signaling pathway via death domain receptors	46	3	0.73	0.03593
topic	k1	GO:0046651	lymphocyte proliferation	156	6	2.47	0.03729
topic	k1	GO:0006364	rRNA processing	80	4	1.27	0.03775
topic	k1	GO:0034097	response to cytokine	429	12	6.79	0.03917
topic	k1	GO:0033598	mammary gland epithelial cell proliferation	20	2	0.32	0.03923
topic	k1	GO:0001913	T cell mediated cytotoxicity	20	2	0.32	0.03923
topic	k1	GO:0048662	negative regulation of smooth muscle cell proliferation	20	2	0.32	0.03923
topic	k1	GO:0051017	actin filament bundle assembly	81	4	1.28	0.03924
topic	k1	GO:0061572	actin filament bundle organization	81	4	1.28	0.03924
topic	k1	GO:0032943	mononuclear cell proliferation	158	6	2.5	0.0393
topic	k1	GO:0002709	regulation of T cell mediated immunity	48	3	0.76	0.04002
topic	k1	GO:0031341	regulation of cell killing	48	3	0.76	0.04002
topic	k1	GO:0032680	regulation of tumor necrosis factor production	82	4	1.3	0.04077
topic	k1	GO:0032640	tumor necrosis factor production	82	4	1.3	0.04077
topic	k1	GO:0007155	cell adhesion	581	15	9.2	0.04128
topic	k1	GO:0031348	negative regulation of defense response	120	5	1.9	0.04155
topic	k1	GO:0052547	regulation of peptidase activity	162	9	2.56	0.04169
topic	k1	GO:0036473	cell death in response to oxidative stress	49	3	0.78	0.04215
topic	k1	GO:0051492	regulation of stress fiber assembly	49	3	0.78	0.04215
topic	k1	GO:0051250	negative regulation of lymphocyte activation	83	4	1.31	0.04232
topic	k1	GO:0009187	cyclic nucleotide metabolic process	21	2	0.33	0.04292
topic	k1	GO:0001541	ovarian follicle development	21	2	0.33	0.04292
topic	k1	GO:0042119	neutrophil activation	21	2	0.33	0.04292
topic	k1	GO:0022610	biological adhesion	586	15	9.27	0.04396
topic	k1	GO:1901224	positive regulation of NIK/NF-kappaB signaling	50	3	0.79	0.04434
topic	k1	GO:0031397	negative regulation of protein ubiquitination	50	3	0.79	0.04434
topic	k1	GO:0050670	regulation of lymphocyte proliferation	123	5	1.95	0.0454
topic	k1	GO:0032760	positive regulation of tumor necrosis factor production	51	3	0.81	0.04658
topic	k1	GO:0001776	leukocyte homeostasis	51	3	0.81	0.04658
topic	k1	GO:0042269	regulation of natural killer cell mediated cytotoxicity	22	2	0.35	0.04673
topic	k1	GO:0071706	tumor necrosis factor superfamily cytokine production	86	4	1.36	0.04719
topic	k1	GO:1903555	regulation of tumor necrosis factor superfamily cytokine production	86	4	1.36	0.04719
topic	k1	GO:0030155	regulation of cell adhesion	394	11	6.24	0.04781
topic	k1	GO:0032944	regulation of mononuclear cell proliferation	125	5	1.98	0.04808
topic	k2	GO:0001819	positive regulation of cytokine production	268	23	7.99	0.00015
topic	k2	GO:0071345	cellular response to cytokine stimulus	385	32	11.47	0.00015
topic	k2	GO:0097193	intrinsic apoptotic signaling pathway	188	18	5.6	0.00018
topic	k2	GO:0045577	regulation of B cell differentiation	19	5	0.57	0.00019
topic	k2	GO:0046886	positive regulation of hormone biosynthetic process	5	3	0.15	0.00025
topic	k2	GO:0050860	negative regulation of T cell receptor signaling pathway	12	4	0.36	0.00032
topic	k2	GO:0042742	defense response to bacterium	90	10	2.68	0.00033
topic	k2	GO:0031398	positive regulation of protein ubiquitination	74	9	2.2	0.00033
topic	k2	GO:1903753	negative regulation of p38MAPK cascade	6	3	0.18	0.00049
topic	k2	GO:0097011	cellular response to granulocyte macrophage colony-stimulating factor stimulus	6	3	0.18	0.00049
topic	k2	GO:0002676	regulation of chronic inflammatory response	6	3	0.18	0.00049
topic	k2	GO:0002925	positive regulation of humoral immune response mediated by circulating immunoglobulin	6	3	0.18	0.00049
topic	k2	GO:0045087	innate immune response	251	18	7.48	0.0005
topic	k2	GO:0031663	lipopolysaccharide-mediated signaling pathway	36	6	1.07	0.00061
topic	k2	GO:0032703	negative regulation of interleukin-2 production	14	4	0.42	0.00061
topic	k2	GO:0006469	negative regulation of protein kinase activity	115	11	3.43	0.00061
topic	k2	GO:0042129	regulation of T cell proliferation	95	12	2.83	0.00072
topic	k2	GO:0002637	regulation of immunoglobulin production	51	7	1.52	0.00073
topic	k2	GO:1902895	positive regulation of pri-miRNA transcription by RNA polymerase II	25	5	0.74	0.00074
topic	k2	GO:0071385	cellular response to glucocorticoid stimulus	15	4	0.45	0.00081
topic	k2	GO:0002683	negative regulation of immune system process	256	26	7.63	0.00082
topic	k2	GO:0007043	cell-cell junction assembly	52	7	1.55	0.00082
topic	k2	GO:0045444	fat cell differentiation	119	15	3.55	0.00083
topic	k2	GO:1990440	positive regulation of transcription from RNA polymerase II promoter in response to endoplasmic reticulum stress	7	3	0.21	0.00084
topic	k2	GO:1903019	negative regulation of glycoprotein metabolic process	7	3	0.21	0.00084
topic	k2	GO:0051093	negative regulation of developmental process	443	32	13.2	0.00086
topic	k2	GO:0043065	positive regulation of apoptotic process	300	22	8.94	0.0009
topic	k2	GO:0043066	negative regulation of apoptotic process	417	34	12.43	0.0009
topic	k2	GO:0043112	receptor metabolic process	85	9	2.53	0.00092
topic	k2	GO:0007162	negative regulation of cell adhesion	144	15	4.29	0.00095
topic	k2	GO:0019221	cytokine-mediated signaling pathway	184	14	5.48	0.00118
topic	k2	GO:0034620	cellular response to unfolded protein	56	7	1.67	0.00128
topic	k2	GO:0007266	Rho protein signal transduction	56	7	1.67	0.00128
topic	k2	GO:0097201	negative regulation of transcription from RNA polymerase II promoter in response to stress	8	3	0.24	0.00131
topic	k2	GO:0034114	regulation of heterotypic cell-cell adhesion	17	4	0.51	0.00135
topic	k2	GO:0001892	embryonic placenta development	57	7	1.7	0.00143
topic	k2	GO:0071407	cellular response to organic cyclic compound	228	19	6.79	0.00153
topic	k2	GO:0045672	positive regulation of osteoclast differentiation	18	4	0.54	0.0017
topic	k2	GO:2000351	regulation of endothelial cell apoptotic process	30	5	0.89	0.00175
topic	k2	GO:0051241	negative regulation of multicellular organismal process	546	42	16.27	0.00182
topic	k2	GO:0043374	CD8-positive, alpha-beta T cell differentiation	9	3	0.27	0.00192
topic	k2	GO:0035020	regulation of Rac protein signal transduction	9	3	0.27	0.00192
topic	k2	GO:0002863	positive regulation of inflammatory response to antigenic stimulus	9	3	0.27	0.00192
topic	k2	GO:0051044	positive regulation of membrane protein ectodomain proteolysis	9	3	0.27	0.00192
topic	k2	GO:0060263	regulation of respiratory burst	9	3	0.27	0.00192
topic	k2	GO:0071850	mitotic cell cycle arrest	9	3	0.27	0.00192
topic	k2	GO:0044092	negative regulation of molecular function	493	36	14.69	0.00201
topic	k2	GO:0045589	regulation of regulatory T cell differentiation	19	4	0.57	0.0021
topic	k2	GO:0061045	negative regulation of wound healing	32	5	0.95	0.00236
topic	k2	GO:0045787	positive regulation of cell cycle	198	14	5.9	0.00237
topic	k2	GO:0002763	positive regulation of myeloid leukocyte differentiation	38	8	1.13	0.00245
topic	k2	GO:0045047	protein targeting to ER	20	4	0.6	0.00256
topic	k2	GO:0048662	negative regulation of smooth muscle cell proliferation	20	4	0.6	0.00256
topic	k2	GO:0150105	protein localization to cell-cell junction	10	3	0.3	0.00269
topic	k2	GO:1900153	positive regulation of nuclear-transcribed mRNA catabolic process, deadenylation-dependent decay	10	3	0.3	0.00269
topic	k2	GO:1901163	regulation of trophoblast cell migration	10	3	0.3	0.00269
topic	k2	GO:0035970	peptidyl-threonine dephosphorylation	10	3	0.3	0.00269
topic	k2	GO:0035914	skeletal muscle cell differentiation	33	5	0.98	0.00271
topic	k2	GO:0045732	positive regulation of protein catabolic process	117	14	3.49	0.00279
topic	k2	GO:0043405	regulation of MAP kinase activity	141	11	4.2	0.00321
topic	k2	GO:0061061	muscle structure development	238	23	7.09	0.00338
topic	k2	GO:0002252	immune effector process	407	32	12.13	0.00339
topic	k2	GO:0043154	negative regulation of cysteine-type endopeptidase activity involved in apoptotic process	35	5	1.04	0.00353
topic	k2	GO:0032655	regulation of interleukin-12 production	35	5	1.04	0.00353
topic	k2	GO:0032963	collagen metabolic process	35	5	1.04	0.00353
topic	k2	GO:0045646	regulation of erythrocyte differentiation	35	5	1.04	0.00353
topic	k2	GO:0032516	positive regulation of phosphoprotein phosphatase activity	11	3	0.33	0.00361
topic	k2	GO:0043525	positive regulation of neuron apoptotic process	11	3	0.33	0.00361
topic	k2	GO:0072012	glomerulus vasculature development	11	3	0.33	0.00361
topic	k2	GO:0002363	alpha-beta T cell lineage commitment	11	3	0.33	0.00361
topic	k2	GO:0045940	positive regulation of steroid metabolic process	11	3	0.33	0.00361
topic	k2	GO:0002701	negative regulation of production of molecular mediator of immune response	22	4	0.66	0.00369
topic	k2	GO:0050870	positive regulation of T cell activation	113	15	3.37	0.00374
topic	k2	GO:0045665	negative regulation of neuron differentiation	68	7	2.03	0.00397
topic	k2	GO:0043484	regulation of RNA splicing	86	8	2.56	0.00399
topic	k2	GO:1903555	regulation of tumor necrosis factor superfamily cytokine production	86	8	2.56	0.00399
topic	k2	GO:0006446	regulation of translational initiation	36	5	1.07	0.004
topic	k2	GO:1903078	positive regulation of protein localization to plasma membrane	36	5	1.07	0.004
topic	k2	GO:0070228	regulation of lymphocyte apoptotic process	36	5	1.07	0.004
topic	k2	GO:0071363	cellular response to growth factor stimulus	280	17	8.34	0.00422
topic	k2	GO:0030336	negative regulation of cell migration	127	15	3.78	0.00424
topic	k2	GO:0030856	regulation of epithelial cell differentiation	69	7	2.06	0.0043
topic	k2	GO:0032103	positive regulation of response to external stimulus	217	21	6.47	0.00432
topic	k2	GO:0002335	mature B cell differentiation	23	4	0.69	0.00437
topic	k2	GO:0031099	regeneration	42	7	1.25	0.00439
topic	k2	GO:0001818	negative regulation of cytokine production	142	14	4.23	0.0044
topic	k2	GO:0050853	B cell receptor signaling pathway	37	5	1.1	0.00452
topic	k2	GO:0002455	humoral immune response mediated by circulating immunoglobulin	18	6	0.54	0.00458
topic	k2	GO:0019882	antigen processing and presentation	53	6	1.58	0.0047
topic	k2	GO:0007229	integrin-mediated signaling pathway	53	6	1.58	0.0047
topic	k2	GO:1904996	positive regulation of leukocyte adhesion to vascular endothelial cell	12	3	0.36	0.00471
topic	k2	GO:0043951	negative regulation of cAMP-mediated signaling	12	3	0.36	0.00471
topic	k2	GO:0043901	negative regulation of multi-organism process	12	3	0.36	0.00471
topic	k2	GO:0061158	3'-UTR-mediated mRNA destabilization	12	3	0.36	0.00471
topic	k2	GO:0046641	positive regulation of alpha-beta T cell proliferation	12	3	0.36	0.00471
topic	k2	GO:0051043	regulation of membrane protein ectodomain proteolysis	13	5	0.39	0.005
topic	k2	GO:0045598	regulation of fat cell differentiation	71	7	2.12	0.00504
topic	k2	GO:1905898	positive regulation of response to endoplasmic reticulum stress	24	4	0.72	0.00512
topic	k2	GO:0050766	positive regulation of phagocytosis	24	4	0.72	0.00512
topic	k2	GO:0070849	response to epidermal growth factor	24	4	0.72	0.00512
topic	k2	GO:0030866	cortical actin cytoskeleton organization	24	4	0.72	0.00512
topic	k2	GO:2000377	regulation of reactive oxygen species metabolic process	86	10	2.56	0.00518
topic	k2	GO:0050777	negative regulation of immune response	90	8	2.68	0.00526
topic	k2	GO:0031214	biomineral tissue development	72	7	2.15	0.00545
topic	k2	GO:0002685	regulation of leukocyte migration	110	9	3.28	0.00546
topic	k2	GO:0051651	maintenance of location in cell	91	8	2.71	0.00563
topic	k2	GO:0097529	myeloid leukocyte migration	91	8	2.71	0.00563
topic	k2	GO:0034113	heterotypic cell-cell adhesion	30	7	0.89	0.00578
topic	k2	GO:0032535	regulation of cellular component size	174	12	5.18	0.00578
topic	k2	GO:0030278	regulation of ossification	111	9	3.31	0.00579
topic	k2	GO:1903708	positive regulation of hemopoiesis	131	20	3.9	0.00581
topic	k2	GO:0002702	positive regulation of production of molecular mediator of immune response	73	7	2.18	0.00588
topic	k2	GO:0042531	positive regulation of tyrosine phosphorylation of STAT protein	25	4	0.74	0.00595
topic	k2	GO:0050873	brown fat cell differentiation	25	4	0.74	0.00595
topic	k2	GO:0048535	lymph node development	13	3	0.39	0.00599
topic	k2	GO:0060999	positive regulation of dendritic spine development	13	3	0.39	0.00599
topic	k2	GO:1900271	regulation of long-term synaptic potentiation	13	3	0.39	0.00599
topic	k2	GO:0045662	negative regulation of myoblast differentiation	13	3	0.39	0.00599
topic	k2	GO:0001936	regulation of endothelial cell proliferation	56	6	1.67	0.00617
topic	k2	GO:1902533	positive regulation of intracellular signal transduction	466	24	13.89	0.0062
topic	k2	GO:0010628	positive regulation of gene expression	1199	65	35.73	0.00622
topic	k2	GO:0002831	regulation of response to biotic stimulus	176	12	5.24	0.00633
topic	k2	GO:1903038	negative regulation of leukocyte cell-cell adhesion	74	7	2.2	0.00633
topic	k2	GO:0010469	regulation of signaling receptor activity	40	5	1.19	0.00635
topic	k2	GO:0030888	regulation of B cell proliferation	40	5	1.19	0.00635
topic	k2	GO:0051224	negative regulation of protein transport	57	6	1.7	0.00673
topic	k2	GO:1903364	positive regulation of cellular protein catabolic process	75	7	2.23	0.00681
topic	k2	GO:0006357	regulation of transcription by RNA polymerase II	1008	52	30.04	0.00693
topic	k2	GO:0051254	positive regulation of RNA metabolic process	876	48	26.1	0.00708
topic	k2	GO:0002312	B cell activation involved in immune response	58	6	1.73	0.00732
topic	k2	GO:0050871	positive regulation of B cell activation	58	6	1.73	0.00732
topic	k2	GO:1901701	cellular response to oxygen-containing compound	491	29	14.63	0.00733
topic	k2	GO:1900017	positive regulation of cytokine production involved in inflammatory response	14	3	0.42	0.00746
topic	k2	GO:0045429	positive regulation of nitric oxide biosynthetic process	14	3	0.42	0.00746
topic	k2	GO:2001240	negative regulation of extrinsic apoptotic signaling pathway in absence of ligand	14	3	0.42	0.00746
topic	k2	GO:0045582	positive regulation of T cell differentiation	55	8	1.64	0.00757
topic	k2	GO:0051668	localization within membrane	42	5	1.25	0.00782
topic	k2	GO:0043200	response to amino acid	42	5	1.25	0.00782
topic	k2	GO:0051028	mRNA transport	42	5	1.25	0.00782
topic	k2	GO:0031507	heterochromatin assembly	27	4	0.8	0.00788
topic	k2	GO:2000242	negative regulation of reproductive process	27	4	0.8	0.00788
topic	k2	GO:0071456	cellular response to hypoxia	59	6	1.76	0.00795
topic	k2	GO:0051384	response to glucocorticoid	20	6	0.6	0.00813
topic	k2	GO:0030900	forebrain development	138	10	4.11	0.00813
topic	k2	GO:0050920	regulation of chemotaxis	97	8	2.89	0.00822
topic	k2	GO:0002246	wound healing involved in inflammatory response	5	2	0.15	0.00834
topic	k2	GO:1902525	regulation of protein monoubiquitination	5	2	0.15	0.00834
topic	k2	GO:1904798	positive regulation of core promoter binding	5	2	0.15	0.00834
topic	k2	GO:0033139	regulation of peptidyl-serine phosphorylation of STAT protein	5	2	0.15	0.00834
topic	k2	GO:0032747	positive regulation of interleukin-23 production	5	2	0.15	0.00834
topic	k2	GO:0072537	fibroblast activation	5	2	0.15	0.00834
topic	k2	GO:0045348	positive regulation of MHC class II biosynthetic process	5	2	0.15	0.00834
topic	k2	GO:0042541	hemoglobin biosynthetic process	5	2	0.15	0.00834
topic	k2	GO:1902932	positive regulation of alcohol biosynthetic process	5	2	0.15	0.00834
topic	k2	GO:0045176	apical protein localization	5	2	0.15	0.00834
topic	k2	GO:0071316	cellular response to nicotine	5	2	0.15	0.00834
topic	k2	GO:0014908	myotube differentiation involved in skeletal muscle regeneration	5	2	0.15	0.00834
topic	k2	GO:0061757	leukocyte adhesion to arterial endothelial cell	5	2	0.15	0.00834
topic	k2	GO:1901537	positive regulation of DNA demethylation	5	2	0.15	0.00834
topic	k2	GO:0045766	positive regulation of angiogenesis	78	7	2.32	0.00841
topic	k2	GO:0050776	regulation of immune response	384	31	11.44	0.00842
topic	k2	GO:1902905	positive regulation of supramolecular fiber organization	118	9	3.52	0.00856
topic	k2	GO:0002456	T cell mediated immunity	60	6	1.79	0.00862
topic	k2	GO:0098586	cellular response to virus	43	5	1.28	0.00864
topic	k2	GO:0050729	positive regulation of inflammatory response	66	10	1.97	0.00891
topic	k2	GO:0040017	positive regulation of locomotion	278	16	8.28	0.00894
topic	k2	GO:0071902	positive regulation of protein serine/threonine kinase activity	140	10	4.17	0.00896
topic	k2	GO:0007249	I-kappaB kinase/NF-kappaB signaling	140	10	4.17	0.00896
topic	k2	GO:0046638	positive regulation of alpha-beta T cell differentiation	28	4	0.83	0.00898
topic	k2	GO:0032273	positive regulation of protein polymerization	79	7	2.35	0.009
topic	k2	GO:1902236	negative regulation of endoplasmic reticulum stress-induced intrinsic apoptotic signaling pathway	15	3	0.45	0.00913
topic	k2	GO:0043524	negative regulation of neuron apoptotic process	61	6	1.82	0.00933
topic	k2	GO:0050672	negative regulation of lymphocyte proliferation	44	5	1.31	0.00951
topic	k2	GO:0045185	maintenance of protein location	44	5	1.31	0.00951
topic	k2	GO:0009617	response to bacterium	246	24	7.33	0.00986
topic	k2	GO:0071495	cellular response to endogenous stimulus	560	30	16.69	0.0099
topic	k2	GO:0043122	regulation of I-kappaB kinase/NF-kappaB signaling	121	9	3.61	0.01002
topic	k2	GO:0009890	negative regulation of biosynthetic process	772	42	23	0.01008
topic	k2	GO:0048640	negative regulation of developmental growth	29	4	0.86	0.01018
topic	k2	GO:0060964	regulation of gene silencing by miRNA	29	4	0.86	0.01018
topic	k2	GO:1990868	response to chemokine	29	4	0.86	0.01018
topic	k2	GO:1990869	cellular response to chemokine	29	4	0.86	0.01018
topic	k2	GO:0001889	liver development	45	5	1.34	0.01045
topic	k2	GO:1903707	negative regulation of hemopoiesis	82	7	2.44	0.01095
topic	k2	GO:0032680	regulation of tumor necrosis factor production	82	7	2.44	0.01095
topic	k2	GO:0032640	tumor necrosis factor production	82	7	2.44	0.01095
topic	k2	GO:0010632	regulation of epithelial cell migration	123	14	3.67	0.01096
topic	k2	GO:0050708	regulation of protein secretion	102	8	3.04	0.01099
topic	k2	GO:1903203	regulation of oxidative stress-induced neuron death	16	3	0.48	0.01099
topic	k2	GO:0031295	T cell costimulation	16	3	0.48	0.01099
topic	k2	GO:1903508	positive regulation of nucleic acid-templated transcription	815	42	24.28	0.01132
topic	k2	GO:0045893	positive regulation of transcription, DNA-templated	815	42	24.28	0.01132
topic	k2	GO:0048708	astrocyte differentiation	30	4	0.89	0.01148
topic	k2	GO:1902680	positive regulation of RNA biosynthetic process	816	42	24.31	0.01153
topic	k2	GO:0030522	intracellular receptor signaling pathway	124	9	3.69	0.01166
topic	k2	GO:0002688	regulation of leukocyte chemotaxis	64	6	1.91	0.0117
topic	k2	GO:0043254	regulation of protein-containing complex assembly	228	17	6.79	0.01208
topic	k2	GO:0051050	positive regulation of transport	366	22	10.91	0.01221
topic	k2	GO:0051129	negative regulation of cellular component organization	389	20	11.59	0.01224
topic	k2	GO:0045060	negative thymic T cell selection	6	2	0.18	0.01226
topic	k2	GO:0010561	negative regulation of glycoprotein biosynthetic process	6	2	0.18	0.01226
topic	k2	GO:0071542	dopaminergic neuron differentiation	6	2	0.18	0.01226
topic	k2	GO:0010523	negative regulation of calcium ion transport into cytosol	6	2	0.18	0.01226
topic	k2	GO:0072567	chemokine (C-X-C motif) ligand 2 production	6	2	0.18	0.01226
topic	k2	GO:2000341	regulation of chemokine (C-X-C motif) ligand 2 production	6	2	0.18	0.01226
topic	k2	GO:0061042	vascular wound healing	6	2	0.18	0.01226
topic	k2	GO:0036480	neuron intrinsic apoptotic signaling pathway in response to oxidative stress	6	2	0.18	0.01226
topic	k2	GO:1990456	mitochondrion-endoplasmic reticulum membrane tethering	6	2	0.18	0.01226
topic	k2	GO:2000774	positive regulation of cellular senescence	6	2	0.18	0.01226
topic	k2	GO:1990144	intrinsic apoptotic signaling pathway in response to hypoxia	6	2	0.18	0.01226
topic	k2	GO:0030388	fructose 1,6-bisphosphate metabolic process	6	2	0.18	0.01226
topic	k2	GO:0016240	autophagosome membrane docking	6	2	0.18	0.01226
topic	k2	GO:0000185	activation of MAPKKK activity	6	2	0.18	0.01226
topic	k2	GO:0045657	positive regulation of monocyte differentiation	6	2	0.18	0.01226
topic	k2	GO:0097709	connective tissue replacement	6	2	0.18	0.01226
topic	k2	GO:0008298	intracellular mRNA localization	6	2	0.18	0.01226
topic	k2	GO:1903376	regulation of oxidative stress-induced neuron intrinsic apoptotic signaling pathway	6	2	0.18	0.01226
topic	k2	GO:0002361	CD4-positive, CD25-positive, alpha-beta regulatory T cell differentiation	6	2	0.18	0.01226
topic	k2	GO:0006620	posttranslational protein targeting to endoplasmic reticulum membrane	6	2	0.18	0.01226
topic	k2	GO:0060558	regulation of calcidiol 1-monooxygenase activity	6	2	0.18	0.01226
topic	k2	GO:0032488	Cdc42 protein signal transduction	6	2	0.18	0.01226
topic	k2	GO:0030854	positive regulation of granulocyte differentiation	6	2	0.18	0.01226
topic	k2	GO:0030335	positive regulation of cell migration	264	15	7.87	0.01248
topic	k2	GO:0061008	hepaticobiliary system development	47	5	1.4	0.0125
topic	k2	GO:1900407	regulation of cellular response to oxidative stress	47	5	1.4	0.0125
topic	k2	GO:0070167	regulation of biomineral tissue development	47	5	1.4	0.0125
topic	k2	GO:0072332	intrinsic apoptotic signaling pathway by p53 class mediator	47	5	1.4	0.0125
topic	k2	GO:0071560	cellular response to transforming growth factor beta stimulus	126	9	3.75	0.01285
topic	k2	GO:0032507	maintenance of protein location in cell	31	4	0.92	0.01288
topic	k2	GO:0048864	stem cell development	31	4	0.92	0.01288
topic	k2	GO:0003008	system process	523	25	15.58	0.01293
topic	k2	GO:0071417	cellular response to organonitrogen compound	241	14	7.18	0.013
topic	k2	GO:0010573	vascular endothelial growth factor production	17	3	0.51	0.01305
topic	k2	GO:0032770	positive regulation of monooxygenase activity	17	3	0.51	0.01305
topic	k2	GO:1900120	regulation of receptor binding	17	3	0.51	0.01305
topic	k2	GO:0090162	establishment of epithelial cell polarity	17	3	0.51	0.01305
topic	k2	GO:0055094	response to lipoprotein particle	17	3	0.51	0.01305
topic	k2	GO:0031294	lymphocyte costimulation	17	3	0.51	0.01305
topic	k2	GO:0071901	negative regulation of protein serine/threonine kinase activity	66	6	1.97	0.0135
topic	k2	GO:1901222	regulation of NIK/NF-kappaB signaling	66	6	1.97	0.0135
topic	k2	GO:0050868	negative regulation of T cell activation	66	6	1.97	0.0135
[truncated: 1,532 more rows]
