# Supplementary material for: Porcine intestinal innate lymphoid cells and lymphocyte spatial context revealed through single-cell RNA sequencing
Source: bioRxiv preprint, doi:10.1101/2022.01.09.475571, version 1 (2022-01-11)
Supplement: Wiarda_SupplementaryData07 [file 475571_file07.xlsx]

## Sheet: File_key
Supplementary Data 7. Differential gene expression and biological process enrichment results in porcine ileal non-leukocytes.
Sheet name	Sheet description
cluster_DGE	Results from differential gene expression analysis between cell clusters
GO_results	Biological processes enriched in cell clusters

## Sheet: cluster_DGE
gene	p_val	avg_logFC	pct.1	pct.2	p_val_adj	cluster
ENSSSCG00000039938	1.18424e-101	1.62252	0.936	0.086	1.69251e-97	36
SLC51B	4.7186e-98	1.91224	0.973	0.163	6.74382e-94	36
ENSSSCG00000037259	2.69917e-96	1.76905	0.968	0.181	3.85765e-92	36
PYCARD	6.50315e-95	1.56471	0.952	0.131	9.2943e-91	36
ENSSSCG00000013593	9.37507e-95	1.98078	0.941	0.128	1.33989e-90	36
TM4SF20	1.21569e-91	1.64555	0.952	0.187	1.73746e-87	36
ENSSSCG00000010734	3.23827e-90	1.3405	0.979	0.32	4.62813e-86	36
C3orf85	9.36426e-89	1.42713	0.883	0.08	1.33834e-84	36
COX5A	9.449e-88	1.11318	0.997	0.81	1.35045e-83	36
ATP5MC1	1.25194e-85	1.14299	0.987	0.769	1.78927e-81	36
ATP5MC3	2.86227e-85	1.12065	0.984	0.629	4.09076e-81	36
CHP2	4.92637e-85	1.17869	0.949	0.148	7.04077e-81	36
PPP1R1B	9.8869e-85	1.08425	0.867	0.089	1.41304e-80	36
OTC	4.24163e-81	0.998853	0.787	0.045	6.06213e-77	36
COX4I1	7.31841e-76	0.659618	1	0.985	1.04595e-71	36
COX5B	5.55068e-75	0.853451	1	0.855	7.93303e-71	36
BTNL2	2.95391e-73	0.958576	0.785	0.074	4.22172e-69	36
ATP5F1A	1.05661e-71	0.94314	0.987	0.727	1.5101e-67	36
ENSSSCG00000031553	1.58761e-71	1.16096	0.856	0.151	2.26902e-67	36
ATP1A1	2.60995e-70	1.15253	0.957	0.395	3.73015e-66	36
ENSSSCG00000003914	2.62798e-70	0.958494	0.989	0.718	3.75591e-66	36
SLPI	7.99465e-70	1.28939	0.761	0.077	1.1426e-65	36
SORD	4.12843e-69	0.827414	0.803	0.113	5.90036e-65	36
ENSSSCG00000006324	1.20128e-68	0.999982	0.957	0.442	1.71687e-64	36
SERHL2	4.94187e-67	0.79324	0.87	0.175	7.06292e-63	36
ENSSSCG00000035437	9.7283e-67	0.959237	0.702	0.042	1.39037e-62	36
ENSSSCG00000038570	8.62703e-66	0.875801	0.75	0.083	1.23297e-61	36
CALM3	1.67378e-64	0.855517	0.963	0.585	2.39217e-60	36
TST	1.79722e-64	0.796801	0.819	0.142	2.56858e-60	36
SPAI-2	6.01228e-64	2.526	0.848	0.237	8.59275e-60	36
ENSSSCG00000003903	2.2865e-63	0.783336	0.979	0.789	3.26787e-59	36
CASP1	5.71817e-63	0.93398	0.878	0.24	8.17241e-59	36
ENSSSCG00000024911	9.88282e-63	1.24736	0.702	0.071	1.41245e-58	36
PDXK	2.10732e-62	0.867271	0.824	0.178	3.01178e-58	36
COX6C	2.57319e-62	0.64476	0.995	0.92	3.6776e-58	36
CCL26	2.72455e-62	0.784804	0.795	0.104	3.89393e-58	36
SI	3.8803e-62	1.57658	0.779	0.139	5.54572e-58	36
COX7C	5.18722e-62	0.641488	0.997	0.905	7.41357e-58	36
MGST1	1.02603e-61	0.869095	0.995	0.709	1.4664e-57	36
SLC51A	1.18181e-61	1.25864	0.71	0.068	1.68904e-57	36
ATP6	2.18277e-61	0.829298	0.979	0.994	3.11961e-57	36
HNF4G	2.34698e-61	0.882898	0.811	0.16	3.35431e-57	36
MAOA	2.62686e-61	0.860819	0.822	0.169	3.7543e-57	36
SOD2	1.37324e-60	0.721802	0.867	0.24	1.96263e-56	36
ENSSSCG00000027921	1.7642e-60	0.827801	0.848	0.208	2.52139e-56	36
ND3	2.3096e-60	0.90831	0.968	0.706	3.30088e-56	36
PRELID1	2.59103e-60	0.830345	0.952	0.599	3.7031e-56	36
ATP5IF1	2.95448e-60	0.766695	0.981	0.709	4.22254e-56	36
SLC4A4	3.29501e-60	0.743065	0.694	0.071	4.70923e-56	36
ENSSSCG00000022258	5.057e-60	1.7481	0.614	0.021	7.22746e-56	36
CORO2A	5.9063e-60	0.796899	0.71	0.08	8.44129e-56	36
LAD1	7.35767e-60	0.83165	0.88	0.255	1.05156e-55	36
CFD	1.10136e-59	-2.17903	0.723	0.875	1.57406e-55	36
ENSSSCG00000035762	1.18786e-59	0.788212	0.944	0.412	1.69769e-55	36
LPL	4.13833e-59	0.753207	0.689	0.062	5.9145e-55	36
NDUFS8	4.18939e-59	0.772667	0.955	0.513	5.98747e-55	36
DEGS2	1.16774e-58	0.719651	0.835	0.181	1.66893e-54	36
KRT14	4.32317e-58	0.996951	0.989	0.641	6.17867e-54	36
COX8A	1.18181e-57	0.610813	0.992	0.914	1.68905e-53	36
COX3	1.04104e-56	0.773333	0.976	0.994	1.48785e-52	36
ENSSSCG00000001447	1.56293e-56	0.635594	0.707	0.086	2.23374e-52	36
S100G	1.6744e-56	1.6542	0.617	0.05	2.39306e-52	36
CD63	1.72456e-56	-1.16254	0.918	0.905	2.46474e-52	36
CHCHD10	2.3194e-56	0.83336	0.894	0.326	3.31489e-52	36
NR1H4	5.13293e-56	0.93351	0.731	0.101	7.33599e-52	36
ENSSSCG00000033716	8.87108e-56	0.832742	0.771	0.151	1.26786e-51	36
MALL	8.877e-56	0.663834	0.633	0.039	1.2687e-51	36
ENSSSCG00000006932	1.96016e-55	0.960238	0.654	0.059	2.80147e-51	36
SELENOM	2.13755e-55	-1.21774	0.029	0.549	3.05498e-51	36
ENSSSCG00000000405	2.55384e-55	0.74468	0.987	0.825	3.64995e-51	36
QSOX1	3.52688e-55	-1.23844	0.098	0.617	5.04061e-51	36
ENSSSCG00000023264	1.13848e-54	0.723837	0.856	0.276	1.62712e-50	36
COX7B	3.22309e-54	0.734842	0.997	0.866	4.60644e-50	36
ANXA5	5.4593e-54	-1.46313	0.016	0.522	7.80243e-50	36
AKR7A2	6.03928e-54	0.698486	0.793	0.19	8.63134e-50	36
COX7A2	6.88758e-54	0.631433	0.987	0.875	9.84373e-50	36
GLUD1	7.70654e-54	0.740729	0.878	0.294	1.10142e-49	36
HSPE1	2.0131e-53	1.13861	0.997	0.73	2.87712e-49	36
ENSSSCG00000002550	2.08662e-53	0.631145	0.989	0.813	2.9822e-49	36
GSTA2	3.00452e-53	1.05015	0.606	0.042	4.29406e-49	36
ATP5PO	8.90459e-53	0.68963	0.981	0.757	1.27264e-48	36
ENSSSCG00000004703	1.00676e-52	0.838927	0.963	0.457	1.43886e-48	36
UQCRC1	1.01908e-52	0.722607	0.936	0.484	1.45647e-48	36
FABP6	1.05234e-52	2.00459	0.822	0.332	1.504e-48	36
ENSSSCG00000002907	2.4483e-52	0.622619	0.992	0.846	3.49911e-48	36
ND2	4.11892e-52	0.986241	0.976	0.929	5.88676e-48	36
C4BPA	1.10956e-51	0.903892	0.864	0.214	1.58579e-47	36
IFI6	6.85554e-51	-1.57616	0.806	0.947	9.79793e-47	36
ENPEP	8.22633e-51	1.02221	0.737	0.139	1.17571e-46	36
CYTB	1.24138e-50	0.784298	0.979	0.961	1.77418e-46	36
PDZK1	1.40268e-50	1.2561	0.665	0.101	2.00471e-46	36
ENSSSCG00000027665	1.51601e-50	0.536887	0.559	0.027	2.16668e-46	36
TSPO	3.55603e-50	0.775043	0.934	0.377	5.08228e-46	36
BRI3BP	4.0693e-50	0.689588	0.726	0.145	5.81584e-46	36
SLC25A6	4.51662e-50	0.726078	0.995	0.852	6.45515e-46	36
NAALADL1	9.57456e-50	1.12947	0.761	0.181	1.3684e-45	36
GLOD5	1.27102e-49	0.584544	0.588	0.042	1.81654e-45	36
ND4	1.67416e-49	0.749601	0.973	0.967	2.39271e-45	36
ENSSSCG00000035686	1.79912e-49	0.735795	0.88	0.332	2.5713e-45	36
C15orf48	2.55258e-49	0.771944	1	0.715	3.64815e-45	36
ENSSSCG00000035538	4.79297e-49	0.72493	0.947	0.573	6.85011e-45	36
ATP5PF	7.77563e-49	0.627508	0.984	0.819	1.11129e-44	36
ENSSSCG00000003225	1.03953e-48	0.660615	0.713	0.139	1.4857e-44	36
UQCRQ	1.34086e-48	0.683745	0.971	0.688	1.91635e-44	36
ALDH1A1	1.48898e-48	0.51221	0.904	0.27	2.12805e-44	36
ENSSSCG00000010893	1.52231e-48	0.848188	0.697	0.125	2.17569e-44	36
ENSSSCG00000037677	1.83715e-48	0.931487	0.649	0.092	2.62565e-44	36
ENSSSCG00000032166	2.58298e-48	0.643125	0.979	0.7	3.6916e-44	36
GSDMB	3.52772e-48	0.645879	0.878	0.279	5.04181e-44	36
ANXA1	5.56501e-48	-1.34291	0.011	0.469	7.95351e-44	36
CRYL1	7.22281e-48	0.618094	0.806	0.249	1.03228e-43	36
ENSSSCG00000014569	1.53867e-47	0.740785	0.997	0.947	2.19907e-43	36
KLF5	2.17606e-47	0.753677	0.92	0.404	3.11003e-43	36
CLDN2	2.5911e-47	0.599704	0.564	0.045	3.7032e-43	36
MGST2	4.77641e-47	0.786743	0.926	0.407	6.82645e-43	36
C3	1.77659e-46	1.36342	0.673	0.148	2.53911e-42	36
FBP2	2.06868e-46	0.514147	0.561	0.045	2.95656e-42	36
TMSB10	4.11377e-46	-1.06572	0.867	0.982	5.8794e-42	36
ENSSSCG00000016100	8.3791e-46	0.646499	0.971	0.647	1.19754e-41	36
RGS2	9.59598e-46	-1.72732	0.141	0.593	1.37146e-41	36
ENSSSCG00000001734	1.33963e-45	0.561219	0.601	0.071	1.9146e-41	36
ENSSSCG00000034019	1.34415e-45	0.581477	0.984	0.801	1.92105e-41	36
GSN	1.39098e-45	-1.48815	0.072	0.528	1.98799e-41	36
HHLA2	1.40242e-45	0.65039	0.585	0.059	2.00434e-41	36
SPINK1	1.6213e-45	1.53077	0.691	0.136	2.31716e-41	36
ND1	3.35128e-45	0.93158	0.957	0.81	4.78965e-41	36
CRYZ	5.19657e-45	0.490079	0.606	0.08	7.42694e-41	36
ENSSSCG00000022187	5.64786e-45	0.468331	0.697	0.125	8.07193e-41	36
ENSSSCG00000027085	5.91571e-45	0.589813	0.941	0.469	8.45474e-41	36
EDN1	7.88303e-45	0.776073	0.543	0.047	1.12664e-40	36
MRPL12	2.11364e-44	0.652651	0.91	0.43	3.02081e-40	36
ATP5PB	2.33968e-44	0.595845	0.979	0.751	3.34387e-40	36
MCRIP2	3.1996e-44	0.615427	0.769	0.22	4.57287e-40	36
ALDOB	3.97611e-44	1.45749	0.678	0.154	5.68266e-40	36
TFF3	9.33607e-44	-5.37873	0.059	0.501	1.33431e-39	36
SPINK4	1.68103e-43	-4.39532	0.064	0.504	2.40252e-39	36
ANXA2	2.03854e-43	0.635929	0.981	0.685	2.91347e-39	36
ENSSSCG00000001229	2.88283e-43	-0.898086	1	1	4.12013e-39	36
UQCR10	4.08547e-43	0.69277	0.944	0.617	5.83896e-39	36
ENSSSCG00000013436	4.20445e-43	0.670181	0.952	0.585	6.00899e-39	36
AKR1A1	5.53181e-43	0.625802	0.92	0.424	7.90606e-39	36
AKR1E2	7.96611e-43	0.566033	0.54	0.056	1.13852e-38	36
NLRP6	1.10228e-42	0.499415	0.527	0.045	1.57538e-38	36
EPHX2	1.66522e-42	0.45228	0.487	0.021	2.37993e-38	36
HINT1	1.88662e-42	0.552621	0.995	0.861	2.69635e-38	36
HSPD1	2.64094e-42	1.12364	0.894	0.504	3.77443e-38	36
ENSSSCG00000034442	3.77556e-42	0.521573	0.761	0.193	5.39604e-38	36
UQCRC2	6.21754e-42	0.525405	0.848	0.312	8.88611e-38	36
ATP5F1C	6.37694e-42	0.600558	0.973	0.641	9.11392e-38	36
ENSSSCG00000032990	2.21525e-41	0.59423	0.559	0.071	3.16604e-37	36
GRTP1	2.26607e-41	0.603783	0.75	0.217	3.23867e-37	36
C1orf115	2.35156e-41	0.552409	0.699	0.166	3.36085e-37	36
SPDEF	3.35598e-41	-2.0849	0.024	0.436	4.79636e-37	36
ENSSSCG00000024666	4.1841e-41	-1.21532	0.008	0.409	5.97991e-37	36
GPX2	4.73927e-41	1.50883	0.66	0.196	6.77337e-37	36
SLC5A6	5.22806e-41	0.441821	0.471	0.021	7.47194e-37	36
CASP3	9.79476e-41	0.655078	0.774	0.261	1.39987e-36	36
GBA3	1.16832e-40	0.482776	0.553	0.062	1.66977e-36	36
ND5	1.17446e-40	0.622226	0.965	0.715	1.67853e-36	36
RPS21	1.20779e-40	0.576266	0.995	0.908	1.72617e-36	36
C5	1.25863e-40	0.65233	0.505	0.047	1.79883e-36	36
LGR4	1.33501e-40	0.556153	0.691	0.175	1.908e-36	36
CYC1	1.37816e-40	0.663781	0.928	0.543	1.96967e-36	36
BDH2	2.94398e-40	0.437964	0.641	0.119	4.20754e-36	36
HKDC1	3.25534e-40	0.582659	0.503	0.039	4.65253e-36	36
ENSSSCG00000030300	3.27169e-40	0.92649	0.753	0.223	4.6759e-36	36
ANPEP	4.34109e-40	1.62849	0.681	0.214	6.20428e-36	36
GSDMD	5.61217e-40	0.555438	0.782	0.252	8.02091e-36	36
MGST3	8.01113e-40	0.593141	0.981	0.769	1.14495e-35	36
SLC39A5	1.42833e-39	0.401226	0.657	0.116	2.04137e-35	36
ENSSSCG00000037071	3.05318e-39	0.562219	0.902	0.412	4.3636e-35	36
ENSSSCG00000033697	3.29518e-39	0.770739	0.995	0.837	4.70947e-35	36
NDUFS6	4.02529e-39	0.58671	0.891	0.448	5.75294e-35	36
NDUFA11	4.50976e-39	0.601987	0.899	0.43	6.44535e-35	36
ENSSSCG00000038808	5.51295e-39	0.484203	0.457	0.021	7.8791e-35	36
COX2	5.72012e-39	0.570129	0.976	0.994	8.17519e-35	36
RBM47	6.08533e-39	0.50372	0.793	0.252	8.69716e-35	36
SLC25A3	6.4188e-39	0.503554	0.987	0.872	9.17375e-35	36
AQP11	7.61702e-39	0.459163	0.577	0.089	1.08862e-34	36
FABP2	9.69019e-39	1.69881	0.66	0.184	1.38492e-34	36
NDUFA13	1.00837e-38	0.502064	0.973	0.727	1.44116e-34	36
ALDH1B1	1.25035e-38	0.475189	0.596	0.113	1.787e-34	36
ENSSSCG00000004970	1.65458e-38	0.633657	1	0.911	2.36472e-34	36
TUFM	2.23851e-38	0.440199	0.641	0.145	3.19928e-34	36
ENSSSCG00000040035	2.39608e-38	-3.31112	0.035	0.427	3.42448e-34	36
ENSSSCG00000036114	2.84565e-38	0.778768	0.939	0.62	4.067e-34	36
STAP2	3.15543e-38	0.499533	0.596	0.107	4.50974e-34	36
PSMB8	4.57841e-38	0.524786	0.981	0.766	6.54346e-34	36
SLC5A8	6.11083e-38	0.52506	0.439	0.021	8.7336e-34	36
ACE2	6.84241e-38	0.764334	0.476	0.039	9.77917e-34	36
COX1	1.0723e-37	0.658983	0.981	0.994	1.53253e-33	36
SSR4	2.1428e-37	0.689179	0.957	0.739	3.0625e-33	36
CLTA	2.40887e-37	0.593475	0.965	0.718	3.44276e-33	36
LGALS2	2.50452e-37	0.739071	0.987	0.659	3.57946e-33	36
ALDH2	3.06686e-37	0.368461	0.753	0.187	4.38316e-33	36
RPS23	3.1242e-37	0.614572	0.995	0.89	4.4651e-33	36
ENSSSCG00000032003	3.61888e-37	0.47372	1	0.941	5.17211e-33	36
GPX3	4.15651e-37	-1.0103	0.008	0.377	5.94048e-33	36
ABCA5	4.46881e-37	0.417567	0.511	0.065	6.38682e-33	36
ENSSSCG00000007743	5.16064e-37	0.469961	0.992	0.855	7.37558e-33	36
ENSSSCG00000013366	5.32542e-37	0.604597	0.955	0.623	7.6111e-33	36
NDUFC1	5.7807e-37	0.57066	0.896	0.49	8.26178e-33	36
CLCA1	6.12961e-37	-3.68785	0.043	0.427	8.76044e-33	36
NDUFV1	7.88725e-37	0.49782	0.816	0.312	1.12725e-32	36
KCNQ1	8.41476e-37	0.361585	0.5	0.056	1.20264e-32	36
HEPACAM2	8.63724e-37	-1.03564	0.019	0.395	1.23443e-32	36
ENSSSCG00000033414	1.05528e-36	0.47027	0.492	0.05	1.5082e-32	36
RPLP2	1.45473e-36	0.571912	0.997	0.899	2.07909e-32	36
HDGF	2.35833e-36	0.475831	0.726	0.211	3.37053e-32	36
RPS18	2.46351e-36	0.729263	0.997	0.899	3.52084e-32	36
MGAM	5.69344e-36	0.969927	0.495	0.062	8.13707e-32	36
ENSSSCG00000038507	5.95702e-36	0.489271	1	0.961	8.51377e-32	36
EXT1	7.48428e-36	0.495871	0.63	0.139	1.06965e-31	36
ENSSSCG00000001341	7.62571e-36	-0.863334	0.981	0.97	1.08987e-31	36
KHK	8.07888e-36	0.804992	0.633	0.157	1.15463e-31	36
ENSSSCG00000013232	8.69023e-36	0.530549	0.888	0.418	1.24201e-31	36
ENSSSCG00000027013	8.79752e-36	0.503877	0.527	0.08	1.25734e-31	36
DHDH	1.17491e-35	0.528808	0.569	0.113	1.67919e-31	36
NDUFB6	1.54644e-35	0.547507	0.872	0.424	2.21017e-31	36
NDUFB9	1.77763e-35	0.552828	0.947	0.62	2.54059e-31	36
PIGR	2.23336e-35	1.43004	0.455	0.047	3.19192e-31	36
XPNPEP2	2.96887e-35	0.743374	0.484	0.059	4.2431e-31	36
FBP1	3.14339e-35	0.432941	0.561	0.098	4.49254e-31	36
ENSSSCG00000035797	3.19164e-35	0.441414	0.415	0.018	4.56149e-31	36
APP	3.33e-35	-1.16944	0.67	0.786	4.75924e-31	36
SEMA6D	3.56246e-35	0.425568	0.455	0.036	5.09146e-31	36
NT5C	4.26447e-35	0.448822	0.66	0.178	6.09478e-31	36
RPS15	4.57002e-35	0.518481	0.997	0.964	6.53148e-31	36
ENSSSCG00000012238	4.81266e-35	0.348288	0.492	0.056	6.87825e-31	36
FGL2	5.49552e-35	-1.21416	0.051	0.424	7.8542e-31	36
ENSSSCG00000040785	6.69235e-35	0.474463	0.46	0.039	9.5647e-31	36
PKIB	9.09561e-35	-1.2276	0.008	0.356	1.29994e-30	36
MISP3	1.04899e-34	-0.729609	0.056	0.433	1.49921e-30	36
AOC1	1.09808e-34	1.03379	0.495	0.077	1.56938e-30	36
DAB2	2.12729e-34	0.943816	0.691	0.255	3.04033e-30	36
RPS13	2.21603e-34	0.607236	0.992	0.846	3.16714e-30	36
ENSSSCG00000038475	2.47014e-34	0.368711	0.444	0.039	3.53032e-30	36
GNA11	2.66405e-34	0.624632	0.686	0.226	3.80746e-30	36
MYO1A	2.70281e-34	0.733896	0.785	0.309	3.86285e-30	36
FZD5	3.14595e-34	0.463623	0.654	0.172	4.49619e-30	36
MT1A	3.52031e-34	0.699375	0.447	0.039	5.03123e-30	36
FOXA3	3.8591e-34	-0.888592	0.016	0.365	5.51543e-30	36
RPS6	4.59127e-34	0.697881	0.979	0.816	6.56184e-30	36
ATF3	4.59544e-34	-1.3798	0.54	0.742	6.5678e-30	36
HID1	5.94486e-34	-0.677901	0.021	0.374	8.49639e-30	36
ENSSSCG00000014909	8.52077e-34	-0.808514	0.029	0.386	1.21779e-29	36
TXNRD1	9.74941e-34	0.476053	0.734	0.246	1.39339e-29	36
ENSSSCG00000010795	9.86776e-34	0.568762	0.864	0.392	1.4103e-29	36
TXNDC17	1.01532e-33	0.535952	0.934	0.635	1.45109e-29	36
TMEM236	1.38499e-33	0.448804	0.543	0.095	1.97943e-29	36
CAMK2N1	1.43983e-33	-0.89647	0.024	0.374	2.0578e-29	36
ASRGL1	1.52891e-33	0.554969	0.793	0.297	2.18512e-29	36
ENSSSCG00000035053	1.77834e-33	1.36651	0.46	0.059	2.5416e-29	36
NDUFB2	2.89669e-33	0.497065	0.963	0.665	4.13995e-29	36
MLPH	2.97236e-33	-0.862625	0.005	0.338	4.2481e-29	36
ENSSSCG00000006081	3.84949e-33	0.510759	0.995	0.849	5.50169e-29	36
MPZL2	3.95472e-33	0.317154	0.383	0.012	5.65209e-29	36
DUSP1	4.25437e-33	-1.72463	0.713	0.792	6.08035e-29	36
ENSSSCG00000020686	4.29771e-33	0.447111	0.819	0.326	6.14228e-29	36
ANG	4.63464e-33	-0.899942	0.056	0.415	6.62382e-29	36
CA13	5.52978e-33	0.398805	0.399	0.021	7.90316e-29	36
ETFB	5.78413e-33	0.49145	0.835	0.383	8.26668e-29	36
SLC25A5	6.17027e-33	0.690971	0.987	0.76	8.81855e-29	36
ENSSSCG00000031023	1.13255e-32	0.42926	0.968	0.659	1.61864e-28	36
MRPS12	1.15436e-32	0.35397	0.699	0.19	1.64981e-28	36
RACK1	1.20781e-32	0.578841	0.989	0.828	1.7262e-28	36
ADGRG7	1.27435e-32	0.463859	0.646	0.163	1.82131e-28	36
MPP1	1.35406e-32	0.722086	0.62	0.169	1.93522e-28	36
ATP1B1	1.49721e-32	0.633798	0.92	0.493	2.13981e-28	36
ENSSSCG00000025928	1.63858e-32	0.467604	0.997	0.95	2.34186e-28	36
DAO	1.8725e-32	0.541015	0.38	0.015	2.67618e-28	36
DSG2	2.15726e-32	0.39653	0.779	0.279	3.08316e-28	36
ENSSSCG00000027515	2.51574e-32	-3.62844	0.085	0.442	3.5955e-28	36
ENSSSCG00000006395	2.52504e-32	-1.0463	0.822	0.825	3.60879e-28	36
BCAS1	2.60601e-32	-0.9437	0.013	0.344	3.72452e-28	36
SDHB	2.77351e-32	0.514738	0.934	0.552	3.9639e-28	36
OSR2	2.89463e-32	0.437034	0.606	0.145	4.13701e-28	36
GSR	3.16955e-32	0.456227	0.798	0.318	4.52993e-28	36
AGPS	3.28222e-32	0.392328	0.601	0.139	4.69095e-28	36
ENSSSCG00000035706	3.61894e-32	0.435364	0.5	0.083	5.17219e-28	36
LSM7	3.63277e-32	0.391008	0.702	0.223	5.19195e-28	36
ENSSSCG00000029761	4.61841e-32	0.365085	0.548	0.107	6.60064e-28	36
ENSSSCG00000039740	4.73655e-32	0.41189	1	0.964	6.76948e-28	36
EIF4EBP2	5.55874e-32	0.394417	0.585	0.128	7.94455e-28	36
TCN1	7.7862e-32	-1.96264	0.011	0.335	1.1128e-27	36
ENSSSCG00000023158	8.68079e-32	0.527392	0.931	0.591	1.24066e-27	36
COX6A1	9.1015e-32	0.468561	0.989	0.872	1.30079e-27	36
ID3	9.70598e-32	-1.41505	0.388	0.665	1.38718e-27	36
NDUFA9	1.18461e-31	0.503159	0.758	0.288	1.69304e-27	36
VDAC3	1.36356e-31	0.473158	0.824	0.365	1.9488e-27	36
KIAA1324	1.65362e-31	-0.656825	0.003	0.318	2.36335e-27	36
RPS12	1.67579e-31	0.548717	0.997	0.941	2.39504e-27	36
HADH	2.98616e-31	0.40753	0.66	0.187	4.26782e-27	36
SCMH1	3.1419e-31	0.289373	0.42	0.039	4.4904e-27	36
CSRP1	3.37417e-31	-1.20413	0.021	0.35	4.82237e-27	36
BPNT1	3.51207e-31	0.428504	0.668	0.199	5.01945e-27	36
ENSSSCG00000002004	3.94903e-31	0.486723	0.973	0.736	5.64395e-27	36
MPC2	4.05552e-31	0.488896	0.88	0.43	5.79615e-27	36
ENSSSCG00000010517	4.68914e-31	0.541646	0.862	0.436	6.70172e-27	36
NDUFA10	5.164e-31	0.430326	0.769	0.288	7.38039e-27	36
AVPI1	5.34164e-31	0.491761	0.684	0.223	7.63427e-27	36
KRT20	5.50884e-31	0.725798	0.949	0.593	7.87324e-27	36
EPB41L3	5.62794e-31	0.504543	0.399	0.033	8.04346e-27	36
TFF2	5.75151e-31	-3.82132	0.045	0.383	8.22006e-27	36
ATP5ME	7.38769e-31	0.481363	0.973	0.739	1.05585e-26	36
NPDC1	7.41418e-31	-0.72353	0.029	0.359	1.05963e-26	36
ENSSSCG00000031912	8.26191e-31	-1.13285	0.883	0.872	1.18079e-26	36
SLC30A10	1.01965e-30	0.396633	0.423	0.042	1.45728e-26	36
MDH2	1.03858e-30	0.486506	0.867	0.404	1.48435e-26	36
MAPK6	1.09076e-30	0.503367	0.872	0.415	1.55891e-26	36
NDUFS3	1.36283e-30	0.475523	0.822	0.368	1.94776e-26	36
SPAG8	1.46451e-30	0.394627	0.753	0.288	2.09307e-26	36
ENSSSCG00000039460	1.56286e-30	0.610168	0.997	0.89	2.23363e-26	36
PSMB9	2.08922e-30	0.508521	0.952	0.596	2.98591e-26	36
ENSSSCG00000033906	2.21394e-30	1.21737	0.372	0.024	3.16417e-26	36
GLUL	2.21962e-30	-1.18029	0.263	0.576	3.17228e-26	36
ENSSSCG00000039544	2.36978e-30	0.492438	0.997	0.869	3.3869e-26	36
NME1	2.45584e-30	0.610423	0.673	0.243	3.50989e-26	36
IDH3A	2.76932e-30	0.383904	0.62	0.157	3.95791e-26	36
ENSSSCG00000017239	2.83461e-30	0.423777	0.995	0.914	4.05122e-26	36
GALM	2.93108e-30	0.391074	0.532	0.104	4.1891e-26	36
ENSSSCG00000027573	3.3848e-30	0.545153	0.997	0.881	4.83756e-26	36
SLIRP	3.69577e-30	0.43788	0.824	0.35	5.28199e-26	36
RPL34	4.33365e-30	0.547104	1	0.917	6.19365e-26	36
ARF4	5.1356e-30	-0.931314	0.843	0.81	7.3398e-26	36
UBALD2	6.22035e-30	0.505274	0.763	0.309	8.89013e-26	36
TLE4	7.48598e-30	0.44864	0.646	0.19	1.0699e-25	36
TSTD1	9.90896e-30	0.480229	0.782	0.312	1.41619e-25	36
ENSSSCG00000038275	1.00164e-29	0.415113	0.391	0.036	1.43154e-25	36
CHPT1	1.0872e-29	0.373994	0.646	0.178	1.55382e-25	36
EPHX1	1.44562e-29	0.40623	0.572	0.125	2.06608e-25	36
NDUFB8	1.71684e-29	0.451136	0.939	0.564	2.45371e-25	36
SEC62	1.80716e-29	-0.858247	0.766	0.795	2.58279e-25	36
ENSSSCG00000039854	2.03003e-29	0.694863	0.497	0.104	2.90131e-25	36
ENSSSCG00000009303	2.20363e-29	0.610794	0.987	0.834	3.14943e-25	36
GNG11	2.73456e-29	-2.2796	0.005	0.303	3.90824e-25	36
FOS	3.33649e-29	-1.24027	0.824	0.878	4.76851e-25	36
ACO2	3.44362e-29	0.424846	0.793	0.309	4.92162e-25	36
ENSSSCG00000029830	3.56134e-29	0.553298	1	0.947	5.08986e-25	36
RPL10	4.15873e-29	0.471718	0.997	0.973	5.94366e-25	36
RPS10-NUDT3	5.00205e-29	0.554168	0.984	0.831	7.14893e-25	36
CYB5A	5.53251e-29	0.428518	0.814	0.386	7.90707e-25	36
IDH2	7.203e-29	0.48924	0.941	0.611	1.02945e-24	36
PLGRKT	7.5933e-29	0.447212	0.912	0.501	1.08523e-24	36
TLDC2	7.99456e-29	0.491643	0.434	0.059	1.14258e-24	36
IMMT	9.60172e-29	0.3307	0.644	0.175	1.37228e-24	36
SLC9A3R2	9.86595e-29	-0.567875	0.011	0.309	1.41004e-24	36
RPS26	1.12883e-28	0.540971	0.995	0.905	1.61333e-24	36
ENSSSCG00000013889	1.17452e-28	0.532145	0.995	0.923	1.67862e-24	36
MRPL40	1.21355e-28	0.41441	0.816	0.353	1.7344e-24	36
SUCLA2	1.29089e-28	0.340834	0.5	0.092	1.84494e-24	36
MICOS10	1.53222e-28	0.404841	0.973	0.76	2.18985e-24	36
NR1I2	1.78744e-28	0.37591	0.492	0.092	2.5546e-24	36
CDKN3	1.79458e-28	0.333467	0.447	0.065	2.56481e-24	36
BCL2L15	1.80008e-28	0.534804	0.809	0.326	2.57267e-24	36
ENSSSCG00000034527	1.84148e-28	0.438872	0.859	0.439	2.63184e-24	36
HADHA	1.9121e-28	0.388331	0.774	0.297	2.73277e-24	36
PPFIBP1	2.06619e-28	-0.683529	0.04	0.356	2.953e-24	36
GRHPR	2.09004e-28	0.366876	0.604	0.166	2.98708e-24	36
KRT18	2.12165e-28	-1.62598	0.242	0.537	3.03227e-24	36
CTH	2.39306e-28	0.334397	0.481	0.086	3.42016e-24	36
GLS	3.26945e-28	0.421502	0.606	0.169	4.67269e-24	36
FH	3.44672e-28	0.415399	0.795	0.332	4.92606e-24	36
ENSSSCG00000036012	4.27243e-28	0.378202	0.388	0.036	6.10615e-24	36
PGP	4.27322e-28	0.373762	0.46	0.077	6.10729e-24	36
RPS4X	4.41518e-28	0.570168	0.984	0.831	6.31017e-24	36
BTF3	5.02761e-28	0.453017	0.989	0.855	7.18546e-24	36
ENSSSCG00000014004	5.57265e-28	0.339548	0.609	0.157	7.96443e-24	36
ENSSSCG00000028485	6.15257e-28	0.48973	0.995	0.869	8.79326e-24	36
CNN3	6.37307e-28	-0.978839	0.101	0.433	9.1084e-24	36
SLC7A9	6.47383e-28	0.52221	0.434	0.062	9.2524e-24	36
SERPING1	6.89527e-28	-1.42942	0	0.279	9.85473e-24	36
ACADM	6.91413e-28	0.420857	0.734	0.276	9.88168e-24	36
TMEM139	7.0682e-28	0.373461	0.489	0.098	1.01019e-23	36
NDUFS5	8.25393e-28	0.449129	0.963	0.665	1.17965e-23	36
OXCT1	8.52408e-28	0.394851	0.737	0.267	1.21826e-23	36
PLIN3	1.19218e-27	0.421751	0.511	0.11	1.70386e-23	36
TSC22D1	1.45056e-27	-1.13426	0.71	0.745	2.07314e-23	36
PLS1	1.50423e-27	0.76205	0.91	0.493	2.14984e-23	36
ITPK1	1.73176e-27	0.443111	0.721	0.27	2.47503e-23	36
ENSSSCG00000011952	1.7628e-27	0.541276	0.989	0.884	2.5194e-23	36
IGFBP7	1.96851e-27	-2.13728	0.008	0.291	2.81339e-23	36
RPL11	2.29906e-27	0.473608	0.997	0.914	3.28582e-23	36
TKFC	2.93252e-27	0.372328	0.505	0.11	4.19115e-23	36
CREB3L1	3.07041e-27	-0.688307	0.053	0.362	4.38823e-23	36
PCSK5	3.194e-27	0.352648	0.386	0.042	4.56486e-23	36
CYCS	4.41145e-27	0.414356	0.992	0.804	6.30484e-23	36
SLC39A4	4.90336e-27	0.390567	0.463	0.089	7.00789e-23	36
EBPL	5.10274e-27	0.373077	0.489	0.107	7.29283e-23	36
ENSSSCG00000039046	5.22126e-27	0.561885	0.987	0.739	7.46222e-23	36
ENSSSCG00000037620	5.97585e-27	1.47286	0.596	0.211	8.54069e-23	36
ECHS1	6.24202e-27	0.453776	0.941	0.721	8.92109e-23	36
ATP5MD	6.88e-27	0.468677	0.968	0.736	9.8329e-23	36
SDHD	7.72659e-27	0.400914	0.894	0.537	1.10428e-22	36
IQGAP2	8.64808e-27	0.359429	0.598	0.175	1.23598e-22	36
ENSSSCG00000011764	8.69232e-27	0.414703	0.883	0.525	1.24231e-22	36
TTC39A	9.31696e-27	-0.581059	0.019	0.306	1.33158e-22	36
NR4A1	9.86824e-27	-1.06136	0.239	0.546	1.41037e-22	36
CALD1	1.03189e-26	-1.79377	0.005	0.279	1.47477e-22	36
HSD11B2	1.07577e-26	-1.92067	0.128	0.439	1.53749e-22	36
RNPEP	1.26387e-26	0.342621	0.71	0.246	1.80632e-22	36
MCEE	1.37115e-26	0.353819	0.66	0.211	1.95965e-22	36
EPS8L3	1.45381e-26	0.315604	0.824	0.362	2.07779e-22	36
ENSSSCG00000012166	1.47508e-26	0.339942	0.718	0.249	2.10818e-22	36
CPO	1.94976e-26	0.644426	0.348	0.027	2.7866e-22	36
LONP2	1.9634e-26	0.307144	0.553	0.139	2.80609e-22	36
ENSSSCG00000037869	1.9649e-26	0.403905	0.888	0.49	2.80824e-22	36
MICOS13	2.1662e-26	0.377285	0.806	0.362	3.09594e-22	36
MYO1D	2.28418e-26	0.345791	0.516	0.122	3.26455e-22	36
RAB17	2.297e-26	0.5845	0.439	0.083	3.28287e-22	36
PNLIPRP2	2.33459e-26	-1.32957	0.066	0.374	3.3366e-22	36
RPSA	2.36297e-26	0.588221	0.997	0.896	3.37716e-22	36
ITM2B	2.41826e-26	-0.875178	0.944	0.893	3.45618e-22	36
ASS1	2.63501e-26	0.75382	0.686	0.252	3.76595e-22	36
S100A11	3.00901e-26	-1.19929	0.013	0.291	4.30047e-22	36
ENSSSCG00000018061	3.87336e-26	0.31837	0.912	0.531	5.53581e-22	36
SNRPF	4.57929e-26	0.528626	0.766	0.359	6.54472e-22	36
PHB	4.67776e-26	0.436496	0.766	0.344	6.68545e-22	36
GAPDH	4.97273e-26	0.445482	0.995	0.917	7.10702e-22	36
ENSSSCG00000004760	5.26356e-26	0.471889	0.886	0.427	7.52269e-22	36
TCF4	5.34826e-26	-0.871622	0	0.261	7.64373e-22	36
TIMM8A	5.62828e-26	0.412641	0.428	0.077	8.04394e-22	36
EPB41L2	8.77512e-26	-0.557435	0.016	0.291	1.25414e-21	36
ENSSSCG00000009498	1.14281e-25	0.274439	0.327	0.021	1.6333e-21	36
GSTO1	1.34167e-25	0.52068	0.944	0.611	1.91752e-21	36
NDUFS4	1.5137e-25	0.439965	0.918	0.585	2.16339e-21	36
ANKRD40CL	1.61695e-25	0.424418	0.303	0.009	2.31094e-21	36
PTGR1	1.68897e-25	0.273034	0.447	0.083	2.41388e-21	36
MAOB	1.91051e-25	0.315575	0.527	0.122	2.7305e-21	36
KRT8	2.00672e-25	0.555471	0.995	0.671	2.868e-21	36
FAM83H	2.16696e-25	0.310242	0.524	0.136	3.09702e-21	36
LGALS1	2.24562e-25	-2.03021	0	0.255	3.20944e-21	36
FAM3D	2.37059e-25	-1.38967	0.101	0.401	3.38805e-21	36
DDX5	2.38078e-25	-0.674182	0.91	0.905	3.40261e-21	36
AGR2	2.60144e-25	-3.79049	0.181	0.475	3.71798e-21	36
BTG2	2.63529e-25	-1.13827	0.822	0.822	3.76635e-21	36
ENSSSCG00000031992	2.64229e-25	0.294721	0.285	0.003	3.77637e-21	36
SH3BGRL3	2.69952e-25	-1.06546	0.41	0.659	3.85815e-21	36
KXD1	2.70215e-25	0.397525	0.997	0.953	3.86192e-21	36
SUCLG2	2.85601e-25	0.381342	0.886	0.49	4.08181e-21	36
ENSSSCG00000003930	2.86236e-25	0.451816	1	0.958	4.09088e-21	36
ENSSSCG00000032067	3.23195e-25	0.374104	0.636	0.214	4.6191e-21	36
ENSSSCG00000038984	3.88679e-25	0.358919	0.386	0.05	5.555e-21	36
SERPINH1	4.37596e-25	-1.27314	0.029	0.309	6.25412e-21	36
SLC13A1	4.75711e-25	0.512143	0.42	0.065	6.79886e-21	36
ANXA4	4.87699e-25	0.547067	0.979	0.68	6.97019e-21	36
NDUFAF3	5.00889e-25	0.372448	0.707	0.285	7.15871e-21	36
BPHL	5.89572e-25	0.326045	0.566	0.154	8.42617e-21	36
SFXN1	6.39773e-25	0.277311	0.378	0.05	9.14364e-21	36
PDE2A	6.63017e-25	-0.481707	0.011	0.273	9.47583e-21	36
NIT1	7.08998e-25	0.308712	0.598	0.181	1.0133e-20	36
HNF4A	7.79667e-25	0.320883	0.739	0.288	1.1143e-20	36
NAPRT	8.79314e-25	0.292674	0.702	0.258	1.25672e-20	36
APOBEC1	9.51574e-25	0.392506	0.34	0.03	1.35999e-20	36
PPA2	9.63974e-25	0.394764	0.569	0.166	1.37771e-20	36
PRADC1	9.71868e-25	0.339403	0.625	0.211	1.38899e-20	36
MAP1LC3A	1.12746e-24	-0.769859	0.364	0.626	1.61137e-20	36
TUBB2B	1.16329e-24	-0.889396	0.277	0.555	1.66258e-20	36
RPS16	1.17096e-24	0.443503	0.997	0.899	1.67353e-20	36
SLC25A15	1.18746e-24	0.267549	0.367	0.045	1.69712e-20	36
RPS20	1.21893e-24	0.395456	1	0.985	1.7421e-20	36
NR2F6	1.2779e-24	0.287745	0.684	0.237	1.82638e-20	36
ENSSSCG00000040056	1.32712e-24	0.52463	0.755	0.341	1.89672e-20	36
REG4	1.37212e-24	-3.58168	0.106	0.404	1.96103e-20	36
PLAGL2	1.44784e-24	0.28443	0.5	0.116	2.06926e-20	36
GPD1	1.64995e-24	0.411811	0.888	0.493	2.35811e-20	36
NDUFB7	1.75615e-24	0.377946	0.939	0.596	2.50989e-20	36
TXN2	2.00702e-24	0.385379	0.809	0.404	2.86843e-20	36
TIMP1	2.09991e-24	-1.10491	0.013	0.276	3.00119e-20	36
ENSSSCG00000033787	2.2237e-24	0.294811	0.362	0.042	3.17811e-20	36
PLA2G12B	2.5374e-24	0.266599	0.628	0.19	3.62645e-20	36
TXNIP	2.56998e-24	-0.955803	0.822	0.813	3.67302e-20	36
ENSSSCG00000011272	2.7544e-24	0.474233	0.992	0.914	3.93659e-20	36
RPLP0	2.8229e-24	0.461747	0.997	0.953	4.03449e-20	36
SNRPE	3.00838e-24	0.568219	0.891	0.668	4.29958e-20	36
CDKN2AIPNL	3.06909e-24	0.393778	0.782	0.362	4.38634e-20	36
ENSSSCG00000014075	4.45991e-24	0.382458	0.899	0.51	6.37411e-20	36
AHCY	4.77483e-24	0.302125	0.348	0.042	6.82418e-20	36
SERPINB6	4.93663e-24	0.388855	0.907	0.466	7.05543e-20	36
HTATIP2	5.92958e-24	0.280932	0.697	0.249	8.47456e-20	36
NPM3	6.58397e-24	0.482923	0.465	0.119	9.40982e-20	36
ENSSSCG00000000194	7.36771e-24	0.394092	0.495	0.134	1.05299e-19	36
ENSSSCG00000012119	7.57549e-24	-1.09214	0.963	0.917	1.08269e-19	36
REXO2	8.27068e-24	-0.7684	0.407	0.62	1.18205e-19	36
ENSSSCG00000014296	9.39577e-24	0.398501	0.875	0.475	1.34284e-19	36
ENSSSCG00000012074	9.90997e-24	-0.773393	0.122	0.418	1.41633e-19	36
MKRN2OS	1.12095e-23	0.2714	0.399	0.062	1.60206e-19	36
RABAC1	1.17793e-23	-0.802966	0.707	0.739	1.6835e-19	36
PKIG	1.20533e-23	0.285609	0.686	0.228	1.72265e-19	36
H3F3B	1.42577e-23	-0.540428	0.987	0.997	2.03771e-19	36
FCGRT	1.51898e-23	0.335788	0.968	0.807	2.17092e-19	36
C1R	1.58766e-23	-1.40468	0	0.237	2.26909e-19	36
MYO7B	1.60378e-23	0.273015	0.638	0.214	2.29213e-19	36
DPP4	1.73708e-23	0.654946	0.582	0.193	2.48264e-19	36
IDH3G	1.76272e-23	0.285663	0.707	0.273	2.51927e-19	36
TINAG	1.87221e-23	0.283312	0.303	0.021	2.67576e-19	36
ERICH4	1.93056e-23	0.420316	0.316	0.027	2.75915e-19	36
TMEM45B	1.98809e-23	0.361257	0.824	0.374	2.84138e-19	36
RPL27	2.06738e-23	0.454737	0.995	0.908	2.9547e-19	36
LMO7	2.14079e-23	0.348266	0.702	0.264	3.05962e-19	36
ENSSSCG00000024974	2.20583e-23	0.465111	0.995	0.869	3.15258e-19	36
CDC26	2.26103e-23	0.453667	0.931	0.528	3.23147e-19	36
MDH1	2.4736e-23	0.414518	0.827	0.433	3.53527e-19	36
ADD3	2.49066e-23	0.26959	0.665	0.214	3.55965e-19	36
NDUFC2	2.82864e-23	0.430639	0.936	0.653	4.04269e-19	36
ALS2CL	3.01849e-23	0.28255	0.34	0.039	4.31403e-19	36
CAV1	3.20714e-23	-1.43481	0	0.234	4.58365e-19	36
PRELID2	3.35268e-23	0.310831	0.34	0.039	4.79165e-19	36
WFDC1	3.36645e-23	-0.807597	0.04	0.309	4.81133e-19	36
ND4L	3.5194e-23	0.284462	0.755	0.326	5.02993e-19	36
ATP5F1E	3.74535e-23	0.306821	1	0.917	5.35286e-19	36
GSTK1	4.0065e-23	0.36256	0.827	0.418	5.72609e-19	36
RPL39	4.05414e-23	0.348405	0.997	0.964	5.79418e-19	36
ENSSSCG00000035811	4.55066e-23	0.450278	1	0.938	6.5038e-19	36
EMP1	4.6056e-23	0.339893	0.819	0.359	6.58232e-19	36
SLC6A20	4.72464e-23	0.32541	0.418	0.083	6.75245e-19	36
ETFA	5.21339e-23	0.355217	0.793	0.389	7.45098e-19	36
ENSSSCG00000006830	7.26443e-23	0.432468	0.851	0.51	1.03823e-18	36
ENSSSCG00000001724	7.89264e-23	0.643878	0.274	0.009	1.12802e-18	36
C1S	7.93805e-23	-1.41774	0.013	0.258	1.13451e-18	36
ECHDC2	8.39321e-23	0.331437	0.649	0.237	1.19956e-18	36
DHRS11	9.49576e-23	0.363134	0.976	0.608	1.35713e-18	36
MRPL55	1.00068e-22	0.403249	0.787	0.398	1.43017e-18	36
TNFSF15	1.08504e-22	0.333142	0.298	0.021	1.55074e-18	36
ENSSSCG00000032702	1.19982e-22	0.353601	0.734	0.306	1.71478e-18	36
COMTD1	1.20135e-22	0.255578	0.527	0.145	1.71697e-18	36
DNAJC22	1.23121e-22	0.28885	0.471	0.119	1.75965e-18	36
CEBPB	1.3046e-22	-1.10402	0.572	0.688	1.86453e-18	36
ENSSSCG00000040197	1.36954e-22	0.350831	0.351	0.047	1.95735e-18	36
KARS	1.48513e-22	0.411948	0.902	0.51	2.12255e-18	36
ND6	1.56561e-22	0.317789	0.62	0.205	2.23757e-18	36
PHB2	1.62934e-22	0.429365	0.795	0.409	2.32866e-18	36
RAB26	1.75048e-22	-0.563853	0.013	0.255	2.50179e-18	36
ENSSSCG00000031088	1.94929e-22	0.430484	0.995	0.932	2.78592e-18	36
CCDC142	2.06093e-22	0.337277	0.705	0.273	2.94548e-18	36
CFTR	2.15165e-22	0.25288	0.295	0.021	3.07514e-18	36
CD81	2.17581e-22	-1.12191	0.093	0.368	3.10967e-18	36
COL18A1	2.50949e-22	-1.03539	0.005	0.237	3.58657e-18	36
ENSSSCG00000023546	2.61308e-22	0.566536	0.314	0.033	3.73462e-18	36
UBC	2.69024e-22	-0.536937	0.976	0.953	3.8449e-18	36
ENSSSCG00000001398	2.73866e-22	-0.861716	0.383	0.602	3.91409e-18	36
TPPP3	3.38771e-22	-0.718083	0.074	0.35	4.84171e-18	36
LTA4H	3.40805e-22	0.292748	0.439	0.095	4.87079e-18	36
ENSSSCG00000036296	3.52902e-22	0.424907	0.995	0.884	5.04367e-18	36
SLC1A1	3.65803e-22	0.420606	0.343	0.047	5.22805e-18	36
CASP7	3.98032e-22	0.381455	0.83	0.424	5.68868e-18	36
DDT	4.19473e-22	0.348678	0.888	0.528	5.99511e-18	36
EEF1D	4.49798e-22	0.474904	0.928	0.641	6.42851e-18	36
RDX	4.66966e-22	-0.634172	0.019	0.261	6.67388e-18	36
NDUFS7	4.74165e-22	0.356597	0.888	0.546	6.77677e-18	36
NEURL1	5.53399e-22	-0.437911	0.005	0.237	7.90918e-18	36
MRPL11	5.62212e-22	0.330985	0.681	0.279	8.03513e-18	36
OLFM4	5.7085e-22	2.00916	0.33	0.05	8.15859e-18	36
ENSSSCG00000033019	6.15545e-22	0.525299	0.981	0.822	8.79737e-18	36
PARD6B	6.42275e-22	0.27997	0.428	0.095	9.17939e-18	36
ENSSSCG00000032060	6.92193e-22	0.272463	0.721	0.3	9.89282e-18	36
SNRPD3	6.92322e-22	0.343088	0.854	0.478	9.89467e-18	36
FAM83B	7.6855e-22	0.391424	0.508	0.151	1.09841e-17	36
SULT1B1	7.71854e-22	0.37532	0.426	0.092	1.10313e-17	36
SNRNP25	7.82448e-22	0.291782	0.614	0.214	1.11827e-17	36
NDUFA8	8.46161e-22	0.326353	0.803	0.398	1.20933e-17	36
TMEM171	8.71161e-22	0.364354	0.816	0.371	1.24506e-17	36
SCIN	9.83454e-22	0.490019	0.737	0.335	1.40555e-17	36
ENSSSCG00000020830	9.91267e-22	0.435138	0.989	0.896	1.41672e-17	36
CAPN9	9.93482e-22	-0.588702	0.011	0.243	1.41988e-17	36
AMN	1.09426e-21	0.395395	0.33	0.045	1.56391e-17	36
PRDX3	1.09975e-21	0.330901	0.798	0.38	1.57176e-17	36
PEPD	1.20375e-21	0.560443	0.588	0.22	1.7204e-17	36
ENSSSCG00000001455	1.21359e-21	-1.49299	0.059	0.323	1.73446e-17	36
AP1S1	1.28718e-21	0.351227	0.774	0.368	1.83963e-17	36
FAM210B	1.48286e-21	0.362074	0.745	0.347	2.11931e-17	36
ENSSSCG00000033181	1.49901e-21	0.2674	0.253	0.006	2.14238e-17	36
NDUFB10	1.88089e-21	0.348123	0.904	0.496	2.68817e-17	36
CAVIN1	2.0956e-21	-0.627974	0	0.217	2.99504e-17	36
VIM	2.54589e-21	-1.92585	0.066	0.329	3.63859e-17	36
RBP2	2.61408e-21	0.799765	0.343	0.053	3.73604e-17	36
FERMT1	2.76947e-21	0.324812	0.388	0.08	3.95812e-17	36
AS3MT	3.12858e-21	0.277184	0.423	0.089	4.47137e-17	36
SDF4	3.1686e-21	-0.719171	0.676	0.73	4.52856e-17	36
SLC10A2	3.34398e-21	0.606227	0.274	0.018	4.77922e-17	36
MTTP	3.59308e-21	0.350921	0.255	0.009	5.13522e-17	36
GPR160	3.61493e-21	0.263458	0.793	0.35	5.16645e-17	36
SLC7A7	3.93572e-21	0.330665	0.423	0.098	5.62493e-17	36
BTG1	4.04729e-21	-0.695435	0.787	0.84	5.78438e-17	36
EHD2	4.17872e-21	-0.577292	0	0.214	5.97223e-17	36
ENSSSCG00000009138	4.5436e-21	0.584671	0.705	0.288	6.49371e-17	36
NDUFA1	4.9644e-21	0.347005	0.923	0.549	7.09512e-17	36
PSMA4	5.62405e-21	0.388895	0.915	0.579	8.0379e-17	36
TPM4	5.79987e-21	-0.563711	0.926	0.869	8.28917e-17	36
HIGD2A	6.08932e-21	0.354534	0.918	0.531	8.70286e-17	36
FGFBP1	6.27896e-21	0.425828	0.41	0.092	8.97389e-17	36
SUCLG1	6.53416e-21	0.32752	0.947	0.739	9.33862e-17	36
SMIM14	6.61897e-21	-0.838992	0.314	0.537	9.45983e-17	36
AGPAT2	7.17913e-21	0.396777	0.832	0.442	1.02604e-16	36
CAV2	8.31738e-21	-0.72706	0	0.211	1.18872e-16	36
HSPA8	8.62692e-21	0.421854	1	0.944	1.23296e-16	36
SLC9A2	9.11536e-21	0.311629	0.332	0.047	1.30277e-16	36
ADTRP	9.55265e-21	0.399938	0.46	0.122	1.36526e-16	36
DGAT1	9.66776e-21	0.375178	0.734	0.338	1.38172e-16	36
DLST	9.87915e-21	0.273573	0.601	0.211	1.41193e-16	36
NPC1L1	9.89045e-21	0.26784	0.348	0.053	1.41354e-16	36
RPL26	1.02065e-20	0.407235	1	0.935	1.45871e-16	36
MFHAS1	1.08189e-20	0.261193	0.463	0.116	1.54624e-16	36
CREB3L4	1.16365e-20	-0.483019	0.019	0.249	1.66309e-16	36
SLC9A3R1	1.17006e-20	0.657942	0.819	0.481	1.67225e-16	36
PIBF1	1.19575e-20	0.447521	0.383	0.086	1.70897e-16	36
COA3	1.21451e-20	0.365952	0.851	0.451	1.73578e-16	36
ENSSSCG00000011723	1.22714e-20	0.405636	0.271	0.018	1.75383e-16	36
ACSS1	1.24699e-20	0.289214	0.511	0.16	1.7822e-16	36
RPL35	1.29518e-20	0.365889	0.997	0.932	1.85107e-16	36
ISG15	1.37472e-20	-1.40406	0.63	0.769	1.96475e-16	36
SLC6A8	1.5841e-20	0.365249	0.489	0.148	2.26399e-16	36
SQSTM1	1.66897e-20	-0.783539	0.625	0.712	2.38529e-16	36
GNB2	1.79153e-20	-0.63633	0.723	0.766	2.56046e-16	36
RPS3A	1.84738e-20	0.472962	0.995	0.872	2.64028e-16	36
ENSSSCG00000004666	2.45901e-20	0.335411	0.88	0.522	3.51441e-16	36
SDSL	2.82368e-20	0.282241	0.247	0.009	4.03561e-16	36
ENSSSCG00000016284	3.20564e-20	0.505053	0.351	0.062	4.5815e-16	36
NDUFB11	3.35087e-20	0.360309	0.87	0.537	4.78906e-16	36
CRIP2	3.47947e-20	-0.594103	0.003	0.211	4.97286e-16	36
CD74	4.11512e-20	-2.12237	0.17	0.445	5.88134e-16	36
RPL7A	4.38763e-20	0.412698	0.997	0.908	6.27081e-16	36
ENSSSCG00000035048	4.60125e-20	0.394314	0.684	0.329	6.57611e-16	36
RPS17	5.05551e-20	0.419031	0.997	0.95	7.22533e-16	36
STXBP5L	5.68091e-20	-0.504082	0.024	0.252	8.11916e-16	36
ENSSSCG00000025060	5.79212e-20	0.300775	0.593	0.223	8.2781e-16	36
MYL9	7.11276e-20	-1.83148	0.008	0.22	1.01656e-15	36
SDHC	7.69097e-20	0.341774	0.806	0.427	1.09919e-15	36
SLC5A1	7.79741e-20	0.972652	0.436	0.134	1.11441e-15	36
MCF2L	7.96829e-20	-0.474688	0.021	0.246	1.13883e-15	36
SOD1	8.22207e-20	0.389742	0.949	0.694	1.1751e-15	36
RPL6	1.04536e-19	0.436161	0.989	0.825	1.49402e-15	36
ENSSSCG00000034617	1.06979e-19	0.395571	0.997	0.95	1.52894e-15	36
RPS11	1.10407e-19	0.367754	1	0.941	1.57793e-15	36
SLC19A2	1.1555e-19	0.298657	0.338	0.059	1.65144e-15	36
GBA2	1.17528e-19	0.256733	0.434	0.11	1.67971e-15	36
PSMB10	1.28286e-19	0.321679	0.92	0.593	1.83347e-15	36
RPL7	1.32234e-19	0.461609	0.992	0.866	1.88988e-15	36
ENSSSCG00000040273	1.43102e-19	0.372476	0.997	0.908	2.04521e-15	36
BRI3	1.43745e-19	0.280483	0.835	0.407	2.0544e-15	36
LRRC26	1.46628e-19	-0.758361	0.082	0.335	2.09561e-15	36
PLIN2	1.49258e-19	0.283748	0.415	0.101	2.13319e-15	36
ENSSSCG00000027974	1.6157e-19	0.293498	0.561	0.196	2.30916e-15	36
SMTN	1.65274e-19	-0.712964	0.064	0.312	2.36209e-15	36
EIF3H	1.75363e-19	0.368644	0.91	0.599	2.50628e-15	36
RTN4	1.78514e-19	-0.682336	0.524	0.668	2.55132e-15	36
KDELR3	1.80054e-19	-0.406886	0.048	0.288	2.57334e-15	36
TM6SF2	1.98838e-19	0.297106	0.301	0.039	2.84179e-15	36
ENSSSCG00000017509	1.99825e-19	0.395305	0.995	0.944	2.8559e-15	36
ENSSSCG00000037187	2.01142e-19	0.260398	0.481	0.139	2.87471e-15	36
HMGA1	2.72918e-19	0.489602	0.598	0.264	3.90054e-15	36
MAF	2.87007e-19	0.368974	0.394	0.086	4.1019e-15	36
MRPL58	3.0952e-19	0.251195	0.566	0.208	4.42367e-15	36
ESRRA	3.32427e-19	0.319323	0.489	0.151	4.75105e-15	36
GADD45B	3.40747e-19	-0.845315	0.096	0.347	4.86996e-15	36
CGREF1	3.46246e-19	-0.607207	0.016	0.228	4.94855e-15	36
ENSSSCG00000010792	3.46543e-19	1.1437	0.521	0.223	4.95279e-15	36
ENSSSCG00000014855	4.6389e-19	0.386179	0.997	0.979	6.62991e-15	36
IL18	4.71581e-19	0.386811	0.356	0.074	6.73983e-15	36
ENSSSCG00000035768	5.05396e-19	0.471969	0.992	0.905	7.22311e-15	36
RASSF1	5.08531e-19	-0.684592	0.356	0.564	7.26793e-15	36
EIF1	6.20313e-19	-0.362792	0.992	0.994	8.86551e-15	36
MRPL20	6.93463e-19	0.364441	0.816	0.448	9.91097e-15	36
ENSSSCG00000033068	8.07292e-19	0.41439	0.899	0.579	1.15378e-14	36
CISH	8.33296e-19	0.31102	0.41	0.104	1.19095e-14	36
LARP4	8.73643e-19	0.262283	0.465	0.134	1.24861e-14	36
MLEC	9.33935e-19	0.305542	0.537	0.187	1.33478e-14	36
FERMT2	9.78927e-19	-0.632394	0	0.19	1.39908e-14	36
SPARC	1.05479e-18	-0.991842	0.003	0.196	1.5075e-14	36
COL5A2	1.06159e-18	-0.710523	0.003	0.196	1.51723e-14	36
ENPP6	1.06841e-18	-0.648892	0.005	0.202	1.52698e-14	36
TMEM59	1.10469e-18	-0.548912	0.846	0.813	1.57883e-14	36
MRPS14	1.22004e-18	0.278877	0.545	0.19	1.74368e-14	36
RASD1	1.22724e-18	-0.650172	0.005	0.202	1.75397e-14	36
EEF1B2	1.27902e-18	0.468874	0.979	0.846	1.82798e-14	36
ENSSSCG00000007749	1.52253e-18	0.30274	0.713	0.318	2.17601e-14	36
ODC1	1.5441e-18	0.274912	0.58	0.228	2.20683e-14	36
HLA-DRA	1.64893e-18	-1.69587	0.106	0.359	2.35664e-14	36
ENSSSCG00000036716	1.67711e-18	0.336344	0.997	0.955	2.39693e-14	36
GGACT	1.6999e-18	0.286277	0.668	0.273	2.4295e-14	36
ENSSSCG00000013380	1.82343e-18	-0.71052	0.181	0.448	2.60605e-14	36
TMEM263	1.92511e-18	-0.563351	0.184	0.424	2.75137e-14	36
EIF3F	2.03666e-18	0.25519	0.601	0.226	2.9108e-14	36
ENSSSCG00000002953	2.12269e-18	0.396762	0.918	0.507	3.03374e-14	36
SLC35F2	2.43998e-18	0.250625	0.428	0.116	3.48722e-14	36
RPS9	2.6664e-18	0.3829	0.992	0.917	3.81083e-14	36
ETS1	2.9769e-18	-0.725039	0.064	0.3	4.25458e-14	36
ENSSSCG00000037081	3.19926e-18	0.300641	0.981	0.89	4.57238e-14	36
ENSSSCG00000030478	3.62905e-18	0.275103	0.707	0.329	5.18664e-14	36
ECM1	3.75918e-18	-0.737035	0.013	0.214	5.37263e-14	36
ITIH5	3.76258e-18	-0.579403	0	0.184	5.37748e-14	36
FCN2	3.82442e-18	-0.700117	0.649	0.255	5.46586e-14	36
EIF4G1	4.02601e-18	0.267489	0.654	0.267	5.75398e-14	36
ENSSSCG00000000576	4.08564e-18	-0.855947	0.25	0.504	5.83919e-14	36
NDUFV3	4.14152e-18	0.318352	0.846	0.478	5.91906e-14	36
LRRC19	4.14719e-18	0.28932	0.33	0.062	5.92716e-14	36
PPIH	4.26936e-18	0.257233	0.601	0.234	6.10178e-14	36
GCHFR	4.27085e-18	0.305231	0.734	0.35	6.1039e-14	36
LSM6	4.35664e-18	0.359757	0.697	0.341	6.22651e-14	36
SIDT1	4.51856e-18	-0.395659	0.005	0.196	6.45792e-14	36
RPL9	4.98603e-18	0.397289	0.989	0.929	7.12604e-14	36
HES2	5.1542e-18	-0.407662	0.005	0.196	7.36638e-14	36
KLF2	5.51199e-18	-0.817452	0.035	0.252	7.87773e-14	36
ENSSSCG00000000905	6.09407e-18	0.303667	0.955	0.626	8.70964e-14	36
SLC25A24	6.4999e-18	0.291823	0.689	0.323	9.28965e-14	36
MMP2	7.35733e-18	-0.518841	0	0.181	1.05151e-13	36
NUPR1	7.58061e-18	-1.28967	0.011	0.205	1.08342e-13	36
CLRN3	7.7252e-18	0.292517	0.859	0.43	1.10409e-13	36
GALNT6	7.7404e-18	-0.439315	0.016	0.217	1.10626e-13	36
MGAT4A	7.81325e-18	0.338197	0.899	0.608	1.11667e-13	36
ENSSSCG00000033212	7.94896e-18	0.334405	0.875	0.57	1.13607e-13	36
CAVIN2	8.05762e-18	-1.6211	0.003	0.187	1.15159e-13	36
ENSSSCG00000024791	8.05762e-18	-0.429426	0.003	0.187	1.15159e-13	36
STXBP1	8.05762e-18	-0.302018	0.003	0.187	1.15159e-13	36
ENSSSCG00000038581	8.61043e-18	0.269811	0.577	0.226	1.2306e-13	36
RPL5	9.39437e-18	0.461598	0.963	0.712	1.34264e-13	36
ENSSSCG00000008170	1.00472e-17	0.364603	0.997	0.872	1.43594e-13	36
XPNPEP1	1.09687e-17	0.279536	0.487	0.157	1.56764e-13	36
SS18L2	1.11245e-17	0.364392	0.816	0.451	1.58992e-13	36
DSP	1.11832e-17	0.261846	0.811	0.424	1.5983e-13	36
ENSSSCG00000004572	1.15078e-17	-1.01379	0.056	0.282	1.6447e-13	36
ATF4	1.16754e-17	-0.571304	0.896	0.843	1.66864e-13	36
SLC5A12	1.20222e-17	0.504723	0.237	0.018	1.71821e-13	36
HSPA9	1.31101e-17	0.339073	0.713	0.347	1.87369e-13	36
AURKAIP1	1.33739e-17	0.268721	0.737	0.347	1.9114e-13	36
F2R	1.42583e-17	-0.492111	0.013	0.208	2.0378e-13	36
CA8	1.55176e-17	-0.331939	0.011	0.202	2.21777e-13	36
MRPL37	1.55912e-17	0.274077	0.593	0.24	2.22829e-13	36
RAMP2	1.58133e-17	-1.53705	0.003	0.184	2.26003e-13	36
SPON2	1.65238e-17	-0.615586	0.005	0.19	2.36159e-13	36
MRPS15	1.67839e-17	0.255195	0.67	0.276	2.39875e-13	36
ENSSSCG00000000849	1.72114e-17	0.378269	0.944	0.745	2.45985e-13	36
ENSSSCG00000038606	1.72274e-17	0.324288	0.258	0.027	2.46213e-13	36
RPS5	1.96592e-17	0.390434	0.989	0.914	2.8097e-13	36
REEP5	2.04668e-17	-0.603699	0.29	0.504	2.92511e-13	36
HADHB	2.57359e-17	0.257589	0.657	0.3	3.67818e-13	36
SLC26A6	2.75098e-17	0.253182	0.231	0.018	3.9317e-13	36
RHOJ	2.79862e-17	-0.752831	0	0.175	3.99978e-13	36
SCD	2.83195e-17	0.250959	0.285	0.042	4.04743e-13	36
TM4SF1	3.12849e-17	-0.779744	0.053	0.279	4.47123e-13	36
PLPP1	3.27254e-17	-0.81943	0.08	0.309	4.67712e-13	36
GNAI2	3.35119e-17	-0.613461	0.106	0.341	4.78952e-13	36
HNRNPD	3.39921e-17	0.275179	0.548	0.214	4.85815e-13	36
ENSSSCG00000005518	4.27529e-17	-0.449994	0.011	0.199	6.11024e-13	36
LRRC31	4.31294e-17	-0.388369	0.008	0.193	6.16406e-13	36
HACD2	4.35869e-17	0.282806	0.535	0.196	6.22944e-13	36
DYNLL1	4.74907e-17	-0.544122	0.84	0.813	6.78737e-13	36
FSTL1	5.44428e-17	-0.738474	0	0.172	7.78096e-13	36
PNPO	5.56055e-17	0.275947	0.564	0.228	7.94713e-13	36
TOMM7	5.86837e-17	0.280863	0.835	0.475	8.38708e-13	36
ENSSSCG00000014351	6.13626e-17	-1.02993	0.003	0.178	8.76994e-13	36
ST6GALNAC1	6.16665e-17	-0.365562	0.027	0.231	8.81338e-13	36
MFSD2A	8.91647e-17	0.270571	0.511	0.175	1.27434e-12	36
ITLN2	8.96003e-17	-3.27086	0.059	0.276	1.28057e-12	36
DNPEP	9.63432e-17	0.283705	0.38	0.101	1.37694e-12	36
ERH	9.89713e-17	0.375735	0.912	0.632	1.4145e-12	36
ATP8B1	1.06634e-16	0.253228	0.822	0.433	1.52401e-12	36
MGLL	1.18282e-16	-0.432088	0.003	0.175	1.69049e-12	36
ENSSSCG00000006418	1.21888e-16	-0.70306	0.008	0.187	1.74202e-12	36
ENG	1.26815e-16	-0.597255	0.005	0.181	1.81244e-12	36
MFGE8	1.30814e-16	-0.593657	0.005	0.181	1.86959e-12	36
SYT7	1.33526e-16	-0.332424	0.008	0.187	1.90835e-12	36
GNB1	1.41161e-16	0.289828	0.795	0.418	2.01748e-12	36
SSR2	1.41515e-16	-0.463679	0.949	0.944	2.02253e-12	36
NKTR	1.5707e-16	0.278158	0.718	0.341	2.24485e-12	36
ERN2	1.77597e-16	-0.431208	0.019	0.208	2.53821e-12	36
FABP5	2.0132e-16	-2.50728	0.016	0.202	2.87727e-12	36
ENSSSCG00000014371	2.07996e-16	0.307635	0.949	0.656	2.97267e-12	36
ING2	2.17395e-16	0.257122	0.463	0.154	3.107e-12	36
SLC35B1	2.25891e-16	0.260572	0.777	0.404	3.22844e-12	36
RPL22	2.27419e-16	0.382366	0.976	0.772	3.25028e-12	36
COL4A2	2.30525e-16	-0.545454	0.003	0.172	3.29466e-12	36
FAM177B	2.37458e-16	-0.315516	0.013	0.196	3.39374e-12	36
DYNLT3	2.53607e-16	-0.518579	0.125	0.356	3.62455e-12	36
SF3B5	2.5747e-16	0.252504	0.798	0.46	3.67976e-12	36
RPL17-C18orf32	2.6664e-16	0.410545	0.976	0.858	3.81082e-12	36
SLC28A2	2.74413e-16	0.254424	0.223	0.018	3.92191e-12	36
ENSSSCG00000012202	2.87e-16	0.269853	0.293	0.053	4.1018e-12	36
B2M	3.04326e-16	-0.443201	0.997	1	4.34942e-12	36
NFE2L2	3.11021e-16	0.300288	0.761	0.386	4.44511e-12	36
DNAJC10	3.11062e-16	-0.537548	0.245	0.46	4.44569e-12	36
CMBL	3.14712e-16	0.251154	0.652	0.279	4.49787e-12	36
ME2	3.777e-16	0.303182	0.564	0.228	5.39808e-12	36
ENSSSCG00000014031	4.3162e-16	0.408839	0.747	0.448	6.16871e-12	36
THBS1	5.03282e-16	-0.783025	0.005	0.175	7.19291e-12	36
ENSSSCG00000029990	5.29235e-16	-0.879596	0.035	0.234	7.56383e-12	36
ENSSSCG00000004945	5.36549e-16	0.425971	0.955	0.789	7.66836e-12	36
ENSSSCG00000013596	7.01926e-16	0.272574	0.944	0.647	1.00319e-11	36
MSN	7.48219e-16	-0.699615	0.043	0.243	1.06935e-11	36
TIMP3	7.66646e-16	-0.456589	0	0.16	1.09569e-11	36
SNRPD1	8.21809e-16	0.410617	0.819	0.528	1.17453e-11	36
ENSSSCG00000003042	8.89401e-16	0.310763	0.997	0.926	1.27113e-11	36
PRDX5	8.97822e-16	0.390249	0.939	0.647	1.28317e-11	36
MEP1B	9.4981e-16	0.485436	0.261	0.042	1.35747e-11	36
NREP	9.70966e-16	-0.64927	0.021	0.205	1.38771e-11	36
NDUFA6	9.78983e-16	0.274128	0.763	0.407	1.39916e-11	36
TMIGD1	1.02923e-15	1.04829	0.495	0.237	1.47097e-11	36
ENSSSCG00000005738	1.16956e-15	-0.331724	0.008	0.178	1.67153e-11	36
FAM120A	1.21706e-15	0.299896	0.729	0.392	1.73943e-11	36
ENSSSCG00000008898	1.40948e-15	-0.969823	0.069	0.282	2.01443e-11	36
SPP1	1.47621e-15	0.90647	0.223	0.024	2.1098e-11	36
SYNGR1	1.47893e-15	-0.258582	0	0.157	2.11369e-11	36
PPP1R15A	1.57055e-15	-0.692852	0.851	0.789	2.24463e-11	36
LEAP2	1.59232e-15	0.27999	0.253	0.036	2.27574e-11	36
SLC4A7	1.68996e-15	-0.456748	0.125	0.347	2.41529e-11	36
QKI	1.70846e-15	-0.383903	0.011	0.181	2.44173e-11	36
PDLIM7	1.93338e-15	-0.65807	0.043	0.237	2.76318e-11	36
MRPS26	1.94879e-15	0.263133	0.508	0.196	2.78521e-11	36
ENSSSCG00000037808	2.05045e-15	0.321126	0.527	0.211	2.9305e-11	36
MAGED1	2.19504e-15	-0.4113	0.077	0.288	3.13714e-11	36
SLA-DQB1	2.40911e-15	-1.24384	0.074	0.285	3.4431e-11	36
ISG12(A)	2.57088e-15	-0.484412	0.992	0.964	3.6743e-11	36
ANKS4B	2.64608e-15	0.292656	0.614	0.273	3.78178e-11	36
ENSSSCG00000004489	2.65572e-15	0.324731	1	0.994	3.79555e-11	36
ENSSSCG00000004145	2.6583e-15	0.262141	0.862	0.516	3.79925e-11	36
ID2	2.77932e-15	-0.82071	0.785	0.786	3.97221e-11	36
NR2F1	2.8483e-15	-0.369114	0	0.154	4.07079e-11	36
ENSSSCG00000039582	2.85003e-15	0.324699	0.949	0.757	4.07326e-11	36
TK1	3.47236e-15	0.252616	0.298	0.065	4.96269e-11	36
PALM2	3.51353e-15	-0.45229	0.005	0.166	5.02154e-11	36
GCNT3	4.07133e-15	-1.04477	0.146	0.359	5.81875e-11	36
SFT2D1	4.63212e-15	0.291595	0.923	0.647	6.62023e-11	36
ZCCHC17	4.80011e-15	0.272649	0.601	0.27	6.86031e-11	36
ENSSSCG00000031177	5.00443e-15	0.920372	0.561	0.279	7.15232e-11	36
ENSSSCG00000003451	5.47664e-15	-0.585864	0	0.151	7.82721e-11	36
TUBA1B	5.52273e-15	-0.57479	0.723	0.858	7.89309e-11	36
ANKRD12	5.80328e-15	-0.619382	0.471	0.611	8.29405e-11	36
EMILIN1	6.85877e-15	-0.429072	0.005	0.163	9.80256e-11	36
RHOV	6.8792e-15	-0.4886	0.056	0.255	9.83175e-11	36
ENSSSCG00000024776	1.06188e-14	0.395394	0.838	0.549	1.51764e-10	36
TNFAIP3	1.08999e-14	0.345411	0.646	0.32	1.55782e-10	36
ATP2B1	1.55583e-14	0.259836	0.729	0.371	2.22359e-10	36
ARPC1B	1.6192e-14	-0.699573	0.593	0.682	2.31416e-10	36
RPL3	1.68163e-14	0.392762	0.973	0.896	2.40339e-10	36
ENSSSCG00000010954	1.80569e-14	0.304103	0.87	0.537	2.58069e-10	36
CBLIF	2.3628e-14	-0.356308	0.003	0.151	3.37692e-10	36
CDA	2.49119e-14	-0.415975	0.011	0.172	3.56041e-10	36
EGFL7	2.54241e-14	-0.880887	0.011	0.169	3.63361e-10	36
ENSSSCG00000033272	2.60402e-14	0.293646	0.867	0.561	3.72167e-10	36
CPE	2.61447e-14	-0.985638	0.008	0.163	3.73659e-10	36
ENSSSCG00000035669	2.64782e-14	-0.34247	0.005	0.157	3.78426e-10	36
ENSSSCG00000015337	2.65375e-14	0.291381	0.952	0.703	3.79274e-10	36
ENSSSCG00000023595	2.76622e-14	0.262021	0.785	0.442	3.95348e-10	36
TSPAN13	3.47751e-14	-0.745401	0.399	0.528	4.97006e-10	36
PSME1	3.84502e-14	0.25869	0.782	0.424	5.4953e-10	36
COL1A2	3.85559e-14	-1.86514	0	0.142	5.51042e-10	36
GJA1	3.85559e-14	-0.474887	0	0.142	5.51042e-10	36
IGFBP5	3.85559e-14	-0.893111	0	0.142	5.51042e-10	36
ENSSSCG00000035080	4.11559e-14	0.309153	1	0.941	5.882e-10	36
CCL20	4.57559e-14	0.616245	0.457	0.178	6.53944e-10	36
PECAM1	4.81962e-14	-1.15989	0.011	0.166	6.8882e-10	36
ENSSSCG00000015814	4.97152e-14	-0.274694	0.008	0.16	7.1053e-10	36
MSMB	4.97831e-14	-2.47697	0.253	0.43	7.115e-10	36
ENSSSCG00000001456	5.22873e-14	-1.10186	0.088	0.288	7.4729e-10	36
ATP5F1D	5.55303e-14	0.252852	0.705	0.359	7.93639e-10	36
PDHB	5.61093e-14	0.252452	0.713	0.359	8.01914e-10	36
PYCR1	5.8708e-14	-0.465215	0.088	0.288	8.39055e-10	36
LYAR	7.00859e-14	0.308771	0.348	0.11	1.00167e-09	36
ADORA2A	7.36601e-14	-0.284012	0	0.139	1.05275e-09	36
ENSSSCG00000022506	7.36601e-14	-1.03419	0	0.139	1.05275e-09	36
LRRC70	7.36601e-14	-0.673057	0	0.139	1.05275e-09	36
LSM3	7.72399e-14	0.319487	0.582	0.297	1.10391e-09	36
ARHGDIB	7.83832e-14	-0.74518	0.059	0.249	1.12025e-09	36
ENSSSCG00000013064	8.55345e-14	0.304397	0.987	0.878	1.22246e-09	36
ENSSSCG00000034314	8.71171e-14	0.279115	0.739	0.415	1.24508e-09	36
ENSSSCG00000010158	1.01056e-13	0.331126	0.785	0.481	1.44429e-09	36
XBP1	1.0392e-13	-0.620872	0.742	0.742	1.48523e-09	36
RBPMS	1.40505e-13	-0.360404	0	0.136	2.00809e-09	36
SPARCL1	1.40505e-13	-0.816858	0	0.136	2.00809e-09	36
ENSSSCG00000012523	1.41287e-13	-0.470911	0.258	0.46	2.01927e-09	36
BCAM	1.45507e-13	-0.501066	0.016	0.172	2.07959e-09	36
ENSSSCG00000030197	1.49424e-13	0.265327	0.753	0.404	2.13556e-09	36
RPL37	1.58005e-13	0.312295	1	0.858	2.2582e-09	36
HSD11B1L	1.60328e-13	0.316668	1	0.911	2.29141e-09	36
TFPI2	1.69282e-13	-0.529797	0.003	0.142	2.41937e-09	36
LAPTM4A	1.81318e-13	-0.614628	0.824	0.795	2.59139e-09	36
CCN1	1.97095e-13	-0.615811	0.021	0.181	2.81688e-09	36
IER3	2.05127e-13	-0.90525	0.09	0.288	2.93167e-09	36
PDLIM3	2.67592e-13	-0.437456	0	0.134	3.82443e-09	36
GYPC	2.76815e-13	-0.613474	0.035	0.205	3.95624e-09	36
ENSSSCG00000009239	2.80659e-13	-0.599085	0.019	0.175	4.01118e-09	36
ENSSSCG00000003253	3.50424e-13	-0.600181	0.104	0.3	5.00827e-09	36
DHRS9	3.5768e-13	-0.376163	0.032	0.199	5.11196e-09	36
KRAS	4.03256e-13	0.274354	0.856	0.49	5.76334e-09	36
ENSSSCG00000037030	4.75781e-13	0.325019	0.987	0.911	6.79986e-09	36
ABCG1	5.08844e-13	-0.296536	0	0.131	7.2724e-09	36
CLEC14A	5.08844e-13	-0.599874	0	0.131	7.2724e-09	36
VLDLR	5.36487e-13	-0.311873	0.027	0.187	7.66747e-09	36
CACYBP	6.00372e-13	0.254584	0.822	0.499	8.58052e-09	36
COL1A1	6.07465e-13	-1.83488	0.003	0.136	8.68189e-09	36
TPM2	6.11248e-13	-1.87554	0.003	0.136	8.73596e-09	36
TYMS	6.17613e-13	0.273648	0.388	0.139	8.82693e-09	36
TSPAN2	6.18884e-13	-0.251392	0.003	0.136	8.84509e-09	36
ITM2A	6.6815e-13	-0.769224	0.005	0.142	9.54921e-09	36
DPEP1	6.93653e-13	0.910092	0.418	0.19	9.91369e-09	36
DUT	7.1198e-13	0.283867	0.556	0.27	1.01756e-08	36
DUSP5	7.25762e-13	0.287804	0.763	0.457	1.03726e-08	36
FSCN1	7.44016e-13	-0.342984	0.008	0.148	1.06335e-08	36
TCEA2	7.71496e-13	-0.605068	0.021	0.175	1.10262e-08	36
RBMS1	8.22786e-13	-0.406679	0.027	0.184	1.17593e-08	36
TSPAN3	8.25292e-13	-0.527615	0.686	0.7	1.17951e-08	36
SERPINB5	8.32012e-13	-0.28261	0.011	0.154	1.18911e-08	36
CFP	8.36581e-13	0.250061	0.271	0.062	1.19564e-08	36
MMP3	9.02409e-13	-1.58286	0.354	0.098	1.28972e-08	36
COL6A3	9.66124e-13	-0.487596	0	0.128	1.38078e-08	36
MMP14	9.66124e-13	-0.293822	0	0.128	1.38078e-08	36
TMED9	1.05086e-12	-0.493456	0.644	0.685	1.5019e-08	36
ARL3	1.06979e-12	-0.312491	0.016	0.163	1.52894e-08	36
MAP1B	1.15879e-12	-0.490934	0.003	0.134	1.65614e-08	36
TUBB6	1.18053e-12	-0.329015	0.003	0.134	1.68721e-08	36
ENSSSCG00000029160	1.56013e-12	0.287562	0.878	0.608	2.22974e-08	36
COTL1	1.79122e-12	-0.50405	0.106	0.3	2.56001e-08	36
ID1	2.19147e-12	-1.19491	0.394	0.525	3.13205e-08	36
COL3A1	2.2433e-12	-2.60689	0.013	0.154	3.20613e-08	36
SLCO2A1	2.4511e-12	-0.342962	0.013	0.154	3.50311e-08	36
UTRN	2.55874e-12	-0.612884	0.229	0.409	3.65695e-08	36
ENSSSCG00000010703	2.65293e-12	-0.502396	0.008	0.142	3.79157e-08	36
DGAT2	2.86107e-12	-0.281973	0.008	0.142	4.08904e-08	36
ENSSSCG00000005453	2.87155e-12	0.506734	0.979	0.884	4.10402e-08	36
HSPB8	3.10277e-12	-0.389609	0.005	0.136	4.43448e-08	36
LOXL2	3.4671e-12	-0.436757	0	0.122	4.95517e-08	36
POSTN	3.4671e-12	-2.07998	0	0.122	4.95517e-08	36
TSPAN9	3.4671e-12	-0.267355	0	0.122	4.95517e-08	36
RAB27A	3.48613e-12	-0.439826	0.104	0.285	4.98238e-08	36
PRSS23	3.68667e-12	-1.41281	0.221	0.401	5.26898e-08	36
ENSSSCG00000033500	4.6328e-12	0.272377	0.963	0.76	6.62119e-08	36
LDOC1	4.65989e-12	-0.26067	0.005	0.134	6.65992e-08	36
PRKAR1A	4.67239e-12	-0.667203	0.535	0.602	6.67778e-08	36
TMBIM1	5.21754e-12	-0.626706	0.383	0.519	7.45691e-08	36
ENSSSCG00000002036	5.32737e-12	0.250407	0.832	0.504	7.61388e-08	36
ENSSSCG00000010320	5.33938e-12	0.264722	0.907	0.668	7.63105e-08	36
TCIM	5.5849e-12	-0.597915	0.053	0.22	7.98194e-08	36
DPYSL2	5.74869e-12	-0.353441	0.082	0.261	8.21603e-08	36
SAR1A	5.83678e-12	-0.508677	0.412	0.54	8.34193e-08	36
FAM49A	6.09263e-12	-0.261491	0.005	0.134	8.70758e-08	36
ARHGAP29	6.55338e-12	-0.347759	0	0.119	9.36609e-08	36
MMRN1	6.55338e-12	-1.19118	0	0.119	9.36609e-08	36
RGS4	6.55338e-12	-0.520334	0	0.119	9.36609e-08	36
TNFAIP8L3	6.55338e-12	-0.46819	0	0.119	9.36609e-08	36
SDCBP	7.2907e-12	-0.587618	0.564	0.629	1.04199e-07	36
SPRED1	7.33619e-12	-0.307789	0.043	0.202	1.04849e-07	36
P3H1	7.66053e-12	-0.55151	0.237	0.407	1.09484e-07	36
PROS1	7.77152e-12	-0.512934	0.136	0.32	1.11071e-07	36
CXCL14	8.92174e-12	-2.44086	0.011	0.142	1.2751e-07	36
AKAP12	9.07357e-12	-0.448104	0.011	0.142	1.2968e-07	36
GAST	9.1417e-12	-0.401089	0.005	0.131	1.30653e-07	36
EREG	9.30939e-12	0.260223	0.513	0.237	1.3305e-07	36
NIN	1.04701e-11	-0.462573	0.021	0.163	1.49639e-07	36
ELK3	1.06781e-11	-0.333964	0.011	0.142	1.52611e-07	36
CTSF	1.0951e-11	-0.315248	0.024	0.169	1.56511e-07	36
SERPINB9	1.10364e-11	-0.372071	0.09	0.267	1.57732e-07	36
ICA1	1.1115e-11	-0.313526	0.066	0.234	1.58855e-07	36
ENSSSCG00000026064	1.14741e-11	0.302711	0.66	0.365	1.63987e-07	36
PGM5	1.23207e-11	-0.490614	0.016	0.154	1.76087e-07	36
IGF1	1.23689e-11	-0.269007	0	0.116	1.76776e-07	36
RPL36AL	1.38297e-11	0.274411	0.96	0.834	1.97653e-07	36
PSAP	1.59154e-11	-0.645515	0.601	0.641	2.27463e-07	36
PLAU	1.7071e-11	-0.939681	0.005	0.128	2.43978e-07	36
CNDP2	1.81887e-11	0.281631	0.846	0.561	2.59952e-07	36
ENSSSCG00000036618	2.20327e-11	-0.549547	0.021	0.163	3.14892e-07	36
CALCRL	2.33115e-11	-0.313455	0	0.113	3.33168e-07	36
CCL2	2.33115e-11	-1.0555	0	0.113	3.33168e-07	36
ENSSSCG00000036603	2.37535e-11	-0.457216	0.117	0.291	3.39484e-07	36
NCALD	2.44198e-11	-0.519688	0.088	0.258	3.49008e-07	36
PPP1R14A	2.87751e-11	-0.780751	0.003	0.119	4.11253e-07	36
CSTA	2.97763e-11	0.5115	0.226	0.05	4.25562e-07	36
ITGA5	3.25179e-11	-0.326537	0.051	0.208	4.64746e-07	36
RAN	3.26503e-11	0.328219	0.936	0.721	4.66638e-07	36
NID1	3.27212e-11	-0.356718	0.011	0.136	4.67651e-07	36
ENSSSCG00000033537	3.30881e-11	-0.250147	0.011	0.136	4.72896e-07	36
EMP3	3.31846e-11	-0.511722	0.024	0.163	4.74274e-07	36
CTSC	3.32131e-11	-0.480356	0.027	0.169	4.74682e-07	36
RPL23	3.41193e-11	0.287848	0.997	0.923	4.87634e-07	36
HES6	3.57409e-11	-0.37146	0.051	0.208	5.10809e-07	36
PLA2G10	3.6333e-11	-0.803574	0.231	0.389	5.19271e-07	36
EIF3A	3.78657e-11	0.2683	0.771	0.469	5.41177e-07	36
SH3BGRL	3.8231e-11	-0.437707	0.141	0.315	5.46397e-07	36
ERG	4.38726e-11	-0.37964	0	0.11	6.27027e-07	36
LMCD1	4.38726e-11	-0.26835	0	0.11	6.27027e-07	36
TCF21	4.38726e-11	-0.503624	0	0.11	6.27027e-07	36
LAPTM5	4.66942e-11	-0.650959	0.09	0.267	6.67353e-07	36
ARNT	5.0166e-11	-0.650621	0.064	0.223	7.16973e-07	36
CHST4	5.01822e-11	-0.475141	0.122	0.303	7.17204e-07	36
ENSSSCG00000022176	5.21927e-11	-0.386473	0.109	0.282	7.45939e-07	36
RGS1	5.86303e-11	-0.562205	0.04	0.19	8.37945e-07	36
ID4	6.0603e-11	-0.383862	0.072	0.237	8.66138e-07	36
PCSK1N	6.21189e-11	-0.290064	0.005	0.122	8.87803e-07	36
FOLR1	6.28563e-11	-0.34493	0.005	0.122	8.98342e-07	36
CHGA	6.38737e-11	-3.34879	0.011	0.134	9.12883e-07	36
SEPT4	6.98895e-11	-0.379719	0.005	0.122	9.9886e-07	36
LMAN1	7.16499e-11	-0.439377	0.271	0.436	1.02402e-06	36
CDC42EP5	7.22724e-11	-0.565425	0.654	0.659	1.03292e-06	36
CBX6	7.39746e-11	-0.342151	0.008	0.128	1.05725e-06	36
CD93	8.24535e-11	-0.534575	0	0.107	1.17843e-06	36
MFAP4	8.24535e-11	-0.610172	0	0.107	1.17843e-06	36
NKX2-3	8.24535e-11	-0.415341	0	0.107	1.17843e-06	36
DHRS3	8.62285e-11	-0.873752	0.178	0.344	1.23238e-06	36
CCL5	9.45499e-11	-1.58228	0.011	0.134	1.35131e-06	36
REEP1	1.02028e-10	-0.3982	0.003	0.113	1.45818e-06	36
SCG2	1.02028e-10	-1.56048	0.003	0.113	1.45818e-06	36
ARHGEF10L	1.30732e-10	-0.275556	0.011	0.131	1.86842e-06	36
GABARAPL1	1.32304e-10	-0.407508	0.059	0.211	1.89088e-06	36
DNAJB1	1.37962e-10	0.286028	0.907	0.688	1.97175e-06	36
ENSSSCG00000035224	1.50426e-10	-0.372429	0.021	0.151	2.14989e-06	36
BAMBI	1.54749e-10	-0.383103	0	0.104	2.21167e-06	36
EMCN	1.54749e-10	-0.462507	0	0.104	2.21167e-06	36
ENSSSCG00000021899	1.54749e-10	-0.388783	0	0.104	2.21167e-06	36
KDR	1.54749e-10	-0.312794	0	0.104	2.21167e-06	36
TFPI	1.54749e-10	-0.416645	0	0.104	2.21167e-06	36
TGFBR2	1.64987e-10	-0.537074	0.082	0.24	2.358e-06	36
SH3PXD2A	1.82004e-10	-0.310495	0.029	0.166	2.6012e-06	36
COL15A1	1.92288e-10	-0.345791	0.003	0.11	2.74818e-06	36
ENSSSCG00000012699	1.93464e-10	-0.551012	0.003	0.11	2.76499e-06	36
ENSSSCG00000032436	2.02138e-10	-1.37922	0.122	0.285	2.88895e-06	36
AKAP9	2.05007e-10	-0.574428	0.689	0.665	2.92996e-06	36
GON7	2.17049e-10	0.268475	0.633	0.368	3.10206e-06	36
TAGLN	2.20162e-10	-2.40652	0.011	0.128	3.14656e-06	36
PROX1	2.25771e-10	-0.415567	0.008	0.122	3.22673e-06	36
CLIC4	2.29167e-10	-0.62586	0.061	0.211	3.27525e-06	36
LYVE1	2.29644e-10	-1.94389	0.008	0.122	3.28207e-06	36
BEX1	2.35399e-10	-0.286054	0.016	0.139	3.36432e-06	36
CD3G	2.52434e-10	-0.319632	0.005	0.116	3.60779e-06	36
SASH1	2.53022e-10	-0.330003	0.043	0.184	3.6162e-06	36
CDKL1	2.9004e-10	-0.284269	0	0.101	4.14525e-06	36
KANK3	2.9004e-10	-0.268613	0	0.101	4.14525e-06	36
LUM	2.9004e-10	-1.33775	0	0.101	4.14525e-06	36
NEXN	2.9004e-10	-0.38387	0	0.101	4.14525e-06	36
PEAR1	2.9004e-10	-0.27434	0	0.101	4.14525e-06	36
TGFB1I1	2.9004e-10	-0.368014	0	0.101	4.14525e-06	36
APOA4	3.51892e-10	0.804539	0.189	0.036	5.02924e-06	36
TGFB1	3.86033e-10	-0.322252	0.029	0.16	5.51718e-06	36
NFKBIZ	3.98687e-10	0.304765	0.846	0.599	5.69804e-06	36
PCSK1	4.1118e-10	-1.09845	0.005	0.113	5.87659e-06	36
LTBP4	4.63908e-10	-0.382063	0.013	0.131	6.63018e-06	36
ITM2C	5.80749e-10	-0.671523	0.745	0.736	8.30007e-06	36
CLINT1	6.27917e-10	0.283474	0.511	0.279	8.97419e-06	36
GPCPD1	6.55447e-10	-0.409047	0.106	0.267	9.36765e-06	36
CD52	6.67427e-10	-0.880937	0.024	0.151	9.53886e-06	36
ZEB2	6.80088e-10	-0.297645	0.003	0.104	9.71982e-06	36
ENSSSCG00000026140	7.01042e-10	-0.25021	0.003	0.104	1.00193e-05	36
RETNLB	7.0968e-10	-1.25554	0.016	0.134	1.01427e-05	36
SRGN	7.8734e-10	-0.400685	0.048	0.193	1.12527e-05	36
LAT2	8.4823e-10	-0.460975	0.165	0.323	1.21229e-05	36
CD3E	8.92953e-10	-0.623419	0.027	0.154	1.27621e-05	36
TSC22D3	9.68443e-10	-0.364252	0.085	0.24	1.3841e-05	36
IPO11	1.12586e-09	-1.29466	0.04	0.172	1.60908e-05	36
CTNNBIP1	1.31376e-09	-0.365003	0.125	0.282	1.87763e-05	36
SLA-DMB	1.41263e-09	-0.364878	0.013	0.125	2.01893e-05	36
SGSM3	1.5546e-09	-0.40361	0.13	0.294	2.22183e-05	36
S1PR1	1.62277e-09	-0.327126	0.008	0.113	2.31926e-05	36
SELENOS	1.69873e-09	-0.508016	0.766	0.706	2.42783e-05	36
BST2	1.79157e-09	-0.934698	0.431	0.513	2.56051e-05	36
KLHL5	2.73075e-09	-0.260254	0.005	0.104	3.90279e-05	36
GUCA2A	2.75354e-09	-2.07662	0.096	0.252	3.93536e-05	36
PARM1	2.76706e-09	-0.349842	0.035	0.16	3.95468e-05	36
TMED10	2.90755e-09	-0.497036	0.737	0.688	4.15547e-05	36
ENSSSCG00000035293	3.12666e-09	-0.707367	0.013	0.122	4.46862e-05	36
C1orf21	3.23342e-09	-0.541616	0.088	0.231	4.6212e-05	36
MYO5C	3.34747e-09	-0.280769	0.029	0.151	4.7842e-05	36
PNRC1	3.71655e-09	-0.431084	0.87	0.786	5.31169e-05	36
ENSSSCG00000003839	4.05083e-09	-0.994994	0.093	0.237	5.78944e-05	36
NME2	4.84782e-09	0.31219	0.944	0.819	6.92851e-05	36
CLU	5.08734e-09	-0.515429	0.005	0.101	7.27083e-05	36
RARRES1	5.30529e-09	-0.880479	0.008	0.107	7.58232e-05	36
AMCF-II	5.44283e-09	-0.541597	0.043	0.172	7.77889e-05	36
CXCL8	5.94139e-09	-1.24959	0.468	0.525	8.49143e-05	36
ENSSSCG00000037885	5.97707e-09	-0.509892	0.021	0.136	8.54243e-05	36
ZNRF1	6.00207e-09	-0.351364	0.122	0.273	8.57816e-05	36
CD2	6.40501e-09	-0.287353	0.013	0.119	9.15403e-05	36
ZFP36	6.77812e-09	-0.440382	0.888	0.858	9.68728e-05	36
ABCC5	6.92544e-09	-0.262708	0.051	0.181	9.89783e-05	36
ENSSSCG00000036224	8.0632e-09	-0.70511	0.101	0.264	0.000115239	36
ZBTB20	8.71291e-09	-0.362144	0.08	0.223	0.000124525	36
NTN4	1.00302e-08	-0.25499	0.008	0.104	0.000143351	36
WDR45	1.13596e-08	-0.395533	0.181	0.323	0.000162351	36
FLNA	1.23201e-08	-0.811452	0.032	0.148	0.000176079	36
SLK	1.23519e-08	-0.4928	0.199	0.338	0.000176533	36
KDELR2	1.41827e-08	-0.545685	0.665	0.617	0.000202699	36
FAM131C	1.51453e-08	-0.340832	0.053	0.181	0.000216457	36
COL28A1	1.55385e-08	-0.335731	0.035	0.151	0.000222076	36
ARPC2	1.55456e-08	-0.370173	0.971	0.855	0.000222178	36
MAP4K5	1.5916e-08	-0.292252	0.059	0.19	0.000227471	36
FLI1	1.62442e-08	-0.266665	0.019	0.125	0.000232162	36
KDELR1	1.86931e-08	-0.39617	0.691	0.665	0.000267162	36
LTB	2.12543e-08	-0.549578	0.051	0.178	0.000303767	36
TSPAN12	2.19563e-08	-0.443473	0.152	0.291	0.000313799	36
GSDMC	2.28992e-08	-0.951443	0.16	0.297	0.000327275	36
NPM1	2.444e-08	0.397834	0.872	0.691	0.000349296	36
HSP90AA1	2.48063e-08	0.354589	0.984	0.902	0.000354532	36
ICAM2	2.49511e-08	-0.265114	0.019	0.122	0.000356601	36
FABP1	2.58188e-08	0.805632	0.516	0.306	0.000369003	36
MEF2C	2.73671e-08	-0.318865	0.024	0.131	0.000391131	36
CST3	2.7771e-08	-0.89914	0.864	0.745	0.000396903	36
FLOT1	2.95652e-08	-0.409493	0.285	0.404	0.000422545	36
TMF1	3.12844e-08	-0.413998	0.202	0.338	0.000447117	36
NDFIP1	3.67608e-08	-0.47053	0.59	0.62	0.000525386	36
ENSSSCG00000029596	3.88397e-08	-0.299849	0.016	0.116	0.000555097	36
PCLAF	4.01308e-08	0.382414	0.253	0.098	0.000573549	36
ARL6IP5	4.25578e-08	-0.320927	0.085	0.217	0.000608236	36
PHACTR2	4.42018e-08	-0.326235	0.019	0.119	0.000631733	36
C6orf222	4.44427e-08	-1.26019	0.468	0.504	0.000635175	36
ENSSSCG00000033734	4.78928e-08	-0.980403	0.09	0.228	0.000684483	36
LY96	4.82621e-08	-0.266243	0.024	0.128	0.000689762	36
TOP2A	5.21679e-08	0.259053	0.176	0.045	0.000745584	36
STIM2	5.24559e-08	-0.266159	0.061	0.187	0.0007497	36
DUSP10	5.42697e-08	-0.347603	0.165	0.309	0.000775622	36
RANBP1	5.45608e-08	0.295115	0.67	0.442	0.000779783	36
HK2	5.49031e-08	-0.304472	0.059	0.181	0.000784675	36
SERTAD3	5.50428e-08	-0.405119	0.255	0.386	0.000786672	36
SLC44A2	6.3358e-08	-0.307894	0.056	0.178	0.000905512	36
TMEM123	6.68059e-08	-0.410368	0.048	0.166	0.00095479	36
CCL21	6.76068e-08	-3.48393	0.027	0.131	0.000966236	36
YPEL5	6.89861e-08	-0.435229	0.253	0.383	0.000985949	36
CIART	7.33791e-08	-0.257013	0.043	0.157	0.00104873	36
C6orf52	7.46124e-08	-0.308245	0.032	0.139	0.00106636	36
ARMCX3	7.7505e-08	-0.30609	0.074	0.202	0.0011077	36
FAM43A	7.95955e-08	-0.324184	0.027	0.131	0.00113758	36
AHI1	7.99037e-08	-0.256066	0.035	0.145	0.00114198	36
APPL2	8.34826e-08	-0.400488	0.141	0.276	0.00119313	36
PTPRCAP	8.62554e-08	-0.537327	0.109	0.249	0.00123276	36
HSPB1	8.65776e-08	-0.512323	0.947	0.869	0.00123737	36
ENSSSCG00000005481	9.44675e-08	-0.337225	0.08	0.208	0.00135013	36
TMEM63A	1.16016e-07	-0.320893	0.074	0.199	0.0016581	36
CLDN4	1.18153e-07	-1.69822	0.739	0.591	0.00168864	36
ENSSSCG00000017920	1.20482e-07	-0.787153	0.223	0.344	0.00172192	36
ENSSSCG00000033721	1.27223e-07	-0.471033	0.056	0.178	0.00181827	36
ENSSSCG00000038182	1.31042e-07	-1.48571	0.314	0.125	0.00187285	36
DPYSL3	1.38297e-07	-0.256732	0.019	0.113	0.00197654	36
BCAP29	1.38543e-07	-0.420343	0.21	0.344	0.00198005	36
CORO1A	1.46711e-07	-0.539145	0.048	0.163	0.0020968	36
LHFPL6	1.64808e-07	-0.290265	0.024	0.122	0.00235544	36
CFL2	1.72099e-07	-0.299727	0.029	0.131	0.00245964	36
CCNL1	1.78629e-07	-0.396102	0.774	0.733	0.00255297	36
NPTN	1.87609e-07	-0.467678	0.452	0.513	0.00268131	36
CASC4	1.89406e-07	-0.440188	0.239	0.356	0.00270699	36
ADAMDEC1	1.98729e-07	-2.31832	0.013	0.101	0.00284024	36
DDX3X	2.19409e-07	-0.475773	0.668	0.656	0.00313579	36
ENSSSCG00000008137	2.57941e-07	-0.825824	0.34	0.43	0.00368649	36
LITAF	2.73435e-07	-0.445139	0.346	0.442	0.00390794	36
CLDND1	2.84435e-07	-0.421689	0.282	0.392	0.00406515	36
IRF1	3.0044e-07	-0.631019	0.606	0.617	0.00429389	36
FUCA2	3.12121e-07	-0.468807	0.245	0.368	0.00446083	36
NUCB1	3.14082e-07	-0.445756	0.457	0.51	0.00448887	36
CPD	3.19934e-07	-0.40793	0.316	0.43	0.0045725	36
GUCA2B	3.5899e-07	-1.37143	0.056	0.172	0.00513068	36
ANTXR2	4.23317e-07	-0.255321	0.037	0.139	0.00605004	36
PMAIP1	4.41457e-07	-0.651355	0.473	0.516	0.0063093	36
ENSSSCG00000024914	4.44461e-07	-1.22772	0.447	0.208	0.00635223	36
PLAC8	4.54454e-07	-0.50447	0.239	0.377	0.00649506	36
SDC2	4.96522e-07	-0.610257	0.061	0.172	0.00709629	36
TPST2	5.62614e-07	-0.290772	0.101	0.223	0.00804088	36
SAT1	5.75413e-07	-0.416035	0.963	0.872	0.00822381	36
EGR1	5.77056e-07	-0.59815	0.798	0.718	0.00824728	36
PIGT	5.94522e-07	-0.354981	0.239	0.359	0.00849691	36
PPP1R18	6.31548e-07	-0.340422	0.051	0.157	0.00902609	36
ENSSSCG00000037142	6.52856e-07	0.688899	0.92	0.757	0.00933062	36
SEPT7	6.96778e-07	-0.663917	0.636	0.629	0.00995836	36
OAZ2	7.30079e-07	-0.39468	0.136	0.258	0.0104343	36
CLIC2	7.34604e-07	-0.374771	0.037	0.136	0.010499	36
UBE2C	7.45192e-07	0.336841	0.223	0.086	0.0106503	36
RASL11A	8.3862e-07	-0.420305	0.019	0.104	0.0119856	36
HMGB2	1.21958e-06	0.504972	0.548	0.371	0.0174302	36
CAPZB	1.29732e-06	-0.381173	0.737	0.706	0.0185414	36
CREB3L2	1.30421e-06	-0.264765	0.093	0.208	0.0186397	36
DIAPH2	1.32456e-06	-0.275915	0.077	0.19	0.0189306	36
GMFG	1.33329e-06	-0.32033	0.029	0.122	0.0190554	36
TNFRSF1A	1.38879e-06	-0.546589	0.423	0.487	0.0198486	36
SNRPN	1.44946e-06	-0.340883	0.085	0.196	0.0207157	36
ENTPD8	1.50053e-06	-0.447391	0.101	0.22	0.0214456	36
ENSSSCG00000038406	1.50836e-06	-0.526841	0.601	0.608	0.0215575	36
TC2N	1.57222e-06	-0.324437	0.13	0.249	0.0224702	36
DBNDD2	1.57641e-06	-0.607729	0.311	0.398	0.0225301	36
LCP1	1.75908e-06	-0.328257	0.048	0.148	0.0251407	36
SKP1	1.83851e-06	-0.349562	0.88	0.774	0.026276	36
S100A1	1.87828e-06	-0.427959	0.059	0.163	0.0268444	36
ENSSSCG00000032942	2.61735e-06	-0.286203	0.146	0.264	0.0374071	36
RAB5A	3.24427e-06	-0.349238	0.694	0.641	0.0463671	36
SPINK4	1.09238e-87	4.86201	0.736	0.05	1.56123e-83	45
TFF3	1.23216e-87	5.90658	0.732	0.046	1.76101e-83	45
SPDEF	1.05357e-78	2.43851	0.636	0.019	1.50576e-74	45
ENSSSCG00000024666	2.10944e-76	1.49641	0.597	0.006	3.01481e-72	45
ENSSSCG00000040035	1.39076e-74	3.70444	0.623	0.027	1.98767e-70	45
KRT18	5.01434e-74	2.00944	0.784	0.189	7.16649e-70	45
CLCA1	2.71799e-69	4.097	0.61	0.039	3.88455e-65	45
ENSSSCG00000027515	1.3814e-68	4.04619	0.645	0.066	1.9743e-64	45
HEPACAM2	1.66922e-68	1.30014	0.571	0.017	2.38565e-64	45
FOXA3	3.60774e-63	1.12819	0.528	0.015	5.15618e-59	45
AGR2	4.68966e-63	4.2745	0.693	0.141	6.70246e-59	45
TFF2	6.06808e-62	4.21196	0.558	0.035	8.6725e-58	45
HSD11B2	1.89108e-61	2.28446	0.641	0.1	2.70272e-57	45
MLPH	2.08303e-61	1.09924	0.494	0.004	2.97706e-57	45
CHP2	3.26583e-60	-1.29799	0.082	0.805	4.66752e-56	45
TCN1	1.84704e-59	2.29818	0.489	0.008	2.63979e-55	45
BCAS1	6.45571e-58	1.17921	0.494	0.015	9.2265e-54	45
KIAA1324	8.79847e-58	0.856771	0.463	0.002	1.25748e-53	45
FAM3D	1.75601e-56	1.71048	0.584	0.079	2.50969e-52	45
PNLIPRP2	1.9161e-55	1.64439	0.545	0.052	2.73849e-51	45
CLDN4	8.48651e-55	2.24214	0.857	0.579	1.21289e-50	45
REG4	1.2148e-54	3.99047	0.584	0.085	1.73619e-50	45
RGS2	6.34431e-53	1.83644	0.693	0.193	9.06729e-49	45
TTC39A	1.60407e-49	0.760547	0.442	0.017	2.29253e-45	45
DUSP1	2.01587e-49	1.84783	0.874	0.691	2.88109e-45	45
FOS	2.5141e-49	1.38548	0.939	0.807	3.59316e-45	45
TSPO	2.72607e-49	-0.8876	0.255	0.869	3.8961e-45	45
ENSSSCG00000039938	4.95894e-48	-1.31558	0.126	0.73	7.08731e-44	45
ENSSSCG00000003914	1.14313e-47	-0.914935	0.636	0.969	1.63376e-43	45
ATP5MC1	2.54532e-47	-0.974253	0.753	0.946	3.63777e-43	45
CREB3L1	5.55976e-46	0.856197	0.494	0.058	7.94601e-42	45
PKIB	1.03085e-45	1.00528	0.468	0.031	1.4733e-41	45
BTG2	1.57123e-45	1.3242	0.887	0.79	2.24559e-41	45
ANG	1.62162e-45	1.03723	0.528	0.081	2.31762e-41	45
ENSSSCG00000010734	7.79969e-45	-1.05718	0.329	0.83	1.11473e-40	45
ENSSSCG00000014909	8.09649e-45	0.930203	0.494	0.056	1.15715e-40	45
CFD	1.2058e-44	1.36115	0.883	0.753	1.72333e-40	45
NPDC1	4.21251e-44	0.851857	0.472	0.048	6.02051e-40	45
PYCARD	1.66343e-43	-1.18169	0.165	0.755	2.37738e-39	45
ENSSSCG00000033697	1.83329e-43	-0.933243	0.762	0.996	2.62013e-39	45
TSPAN1	2.4968e-43	1.91341	0.814	0.473	3.56842e-39	45
ENSSSCG00000004970	5.87182e-43	-0.81464	0.874	0.998	8.392e-39	45
LRRC26	7.97086e-43	1.00135	0.485	0.066	1.1392e-38	45
SOD2	1.04534e-42	-0.744372	0.195	0.751	1.494e-38	45
RAB26	2.34561e-42	0.747951	0.372	0.01	3.35234e-38	45
RPS23	3.45766e-42	-0.780307	0.848	0.992	4.94169e-38	45
DAB2	5.38765e-42	-1.21265	0.113	0.664	7.70003e-38	45
SLC51B	5.40903e-42	-1.42973	0.229	0.763	7.73059e-38	45
ENSSSCG00000013593	8.4412e-42	-1.51977	0.182	0.737	1.20642e-37	45
C3orf85	1.56952e-41	-1.10662	0.113	0.691	2.24317e-37	45
CAPN9	1.21759e-40	0.778471	0.355	0.008	1.74017e-36	45
C6orf222	1.73386e-40	1.70267	0.727	0.369	2.47803e-36	45
OTC	3.10034e-40	-0.802031	0.065	0.614	4.43101e-36	45
EMP1	4.16869e-40	-0.993536	0.229	0.78	5.95789e-36	45
ENSSSCG00000037259	6.59587e-40	-1.32155	0.26	0.757	9.42682e-36	45
ENSSSCG00000009303	7.17571e-40	-0.842696	0.762	0.988	1.02555e-35	45
COX5B	7.18055e-40	-0.694691	0.831	0.979	1.02624e-35	45
ENSSSCG00000027573	7.34124e-40	-0.755053	0.84	0.992	1.04921e-35	45
SLPI	9.82004e-40	-1.43681	0.074	0.612	1.40348e-35	45
CREB3L4	1.22809e-39	0.652266	0.364	0.015	1.75519e-35	45
RPL10	1.42849e-39	-0.667379	0.965	0.996	2.0416e-35	45
ENSSSCG00000028485	2.01046e-39	-0.73759	0.835	0.983	2.87335e-35	45
ENSSSCG00000023158	2.10796e-39	-0.732959	0.489	0.905	3.0127e-35	45
QSOX1	2.2967e-39	0.993955	0.654	0.195	3.28245e-35	45
COX5A	4.19924e-39	-0.824102	0.792	0.965	6.00156e-35	45
HID1	7.36266e-39	0.746998	0.459	0.058	1.05227e-34	45
RPS13	1.06782e-38	-0.755853	0.788	0.988	1.52613e-34	45
ATP5MC3	1.07702e-38	-0.851282	0.645	0.898	1.53927e-34	45
CAMK2N1	1.56748e-38	0.915352	0.459	0.06	2.24024e-34	45
ENSSSCG00000038507	1.66587e-38	-0.596635	0.944	1	2.38086e-34	45
PPP1R1B	1.8324e-38	-0.805843	0.13	0.676	2.61886e-34	45
NR4A1	3.99762e-38	1.12371	0.662	0.251	5.71339e-34	45
NDUFS8	6.81917e-38	-0.678854	0.463	0.882	9.74596e-34	45
ATP5F1A	1.05253e-37	-0.763339	0.697	0.944	1.50427e-33	45
SLC25A6	1.20942e-37	-0.727463	0.788	0.994	1.7285e-33	45
GCNT3	1.21292e-37	1.339	0.515	0.118	1.7335e-33	45
ENSSSCG00000031912	1.32308e-37	1.1082	0.913	0.861	1.89094e-33	45
TM4SF20	1.7406e-37	-1.24761	0.264	0.747	2.48766e-33	45
ANXA2	2.28751e-37	-0.680832	0.636	0.94	3.2693e-33	45
RPL7	3.495e-37	-0.761868	0.805	0.994	4.99505e-33	45
RPL11	5.19763e-37	-0.654849	0.874	0.998	7.42845e-33	45
MAOA	5.35132e-37	-0.741117	0.152	0.687	7.64811e-33	45
RPS18	7.06318e-37	-0.807928	0.857	0.996	1.00947e-32	45
ENSSSCG00000010795	7.57612e-37	-0.687309	0.294	0.807	1.08278e-32	45
RPL39	1.15222e-36	-0.536878	0.952	0.996	1.64675e-32	45
RPS21	1.21953e-36	-0.63252	0.879	0.99	1.74296e-32	45
PRELID1	1.72977e-36	-0.737685	0.584	0.882	2.47219e-32	45
ENSSSCG00000029830	1.89084e-36	-0.709172	0.926	0.998	2.70239e-32	45
RPL34	2.08442e-36	-0.70112	0.879	1	2.97905e-32	45
STXBP5L	2.36516e-36	0.6674	0.359	0.023	3.38028e-32	45
CCL26	2.7123e-36	-1.06252	0.1	0.645	3.87643e-32	45
RPL22	2.80141e-36	-0.740011	0.667	0.981	4.00378e-32	45
RPS16	3.09084e-36	-0.673412	0.857	0.996	4.41742e-32	45
MSMB	3.32368e-36	2.85533	0.589	0.216	4.7502e-32	45
ENSSSCG00000014569	3.33715e-36	-0.732418	0.926	0.996	4.76946e-32	45
ENSSSCG00000017239	3.50476e-36	-0.552242	0.879	0.994	5.009e-32	45
ENSSSCG00000011952	5.71673e-36	-0.718459	0.835	0.99	8.17035e-32	45
RPL35	1.14346e-35	-0.581157	0.905	0.996	1.63424e-31	45
ADD3	1.64925e-35	-0.630638	0.095	0.622	2.35711e-31	45
ENSSSCG00000013973	3.25485e-35	1.196	0.874	0.546	4.65184e-31	45
ATP1A1	6.56772e-35	-0.913823	0.407	0.828	9.38659e-31	45
ATP5PF	8.11077e-35	-0.604836	0.766	0.973	1.15919e-30	45
ENSSSCG00000035811	1.41441e-34	-0.653957	0.913	0.998	2.02148e-30	45
RPS4X	1.42473e-34	-0.717093	0.753	0.988	2.03623e-30	45
BTNL2	1.48606e-34	-0.724856	0.1	0.616	2.12387e-30	45
LPL	1.49906e-34	-0.677844	0.056	0.554	2.14246e-30	45
HSPE1	1.56803e-34	-0.981218	0.662	0.971	2.24102e-30	45
ENSSSCG00000003903	1.71298e-34	-0.649316	0.753	0.954	2.44818e-30	45
GALNT6	4.87436e-34	0.596953	0.316	0.012	6.96644e-30	45
CGREF1	5.11882e-34	0.791292	0.325	0.017	7.31582e-30	45
RPL6	5.27437e-34	-0.715529	0.753	0.988	7.53813e-30	45
RPS10-NUDT3	7.42555e-34	-0.707186	0.771	0.979	1.06126e-29	45
ENSSSCG00000034617	8.28194e-34	-0.636364	0.926	0.998	1.18366e-29	45
NEURL1	1.14771e-33	0.552258	0.325	0.015	1.6403e-29	45
RPL9	1.22572e-33	-0.656689	0.896	0.992	1.75181e-29	45
SORD	1.24304e-33	-0.625632	0.139	0.639	1.77655e-29	45
ENSSSCG00000031088	1.7655e-33	-0.632054	0.905	0.994	2.52325e-29	45
RPLP2	1.89342e-33	-0.638681	0.857	0.996	2.70608e-29	45
ATF3	2.73795e-33	1.29323	0.784	0.564	3.91308e-29	45
SIDT1	3.94557e-33	0.537303	0.286	0.004	5.63901e-29	45
ITLN2	4.13197e-33	3.65519	0.39	0.052	5.90541e-29	45
ENSSSCG00000003930	5.6486e-33	-0.622576	0.939	1	8.07298e-29	45
ENSSSCG00000040273	6.20915e-33	-0.609735	0.883	0.99	8.87411e-29	45
ENSSSCG00000006324	6.72746e-33	-0.75348	0.433	0.849	9.61488e-29	45
HSPD1	6.86188e-33	-1.05739	0.42	0.849	9.807e-29	45
ENSSSCG00000039740	7.10442e-33	-0.474258	0.948	1	1.01536e-28	45
RPS26	8.13127e-33	-0.66411	0.866	0.994	1.16212e-28	45
RPL27	9.87464e-33	-0.611462	0.874	0.992	1.41128e-28	45
ENSSSCG00000035437	1.19109e-32	-0.752589	0.061	0.548	1.70231e-28	45
RPL26	1.84655e-32	-0.614442	0.909	0.998	2.63909e-28	45
BTF3	1.86099e-32	-0.574045	0.805	0.983	2.65973e-28	45
RPL5	2.42088e-32	-0.757548	0.606	0.959	3.45993e-28	45
ATP5IF1	3.25455e-32	-0.605671	0.684	0.934	4.6514e-28	45
ELF3	3.2991e-32	1.24735	0.779	0.577	4.71507e-28	45
RPS12	3.86502e-32	-0.637936	0.918	0.996	5.52388e-28	45
MISP3	6.00813e-32	0.71932	0.494	0.11	8.58682e-28	45
UQCRC1	6.14208e-32	-0.628407	0.463	0.846	8.77826e-28	45
COX6C	7.24448e-32	-0.511051	0.905	0.985	1.03538e-27	45
SLC4A4	7.34963e-32	-0.587892	0.074	0.556	1.05041e-27	45
RPS6	7.84096e-32	-0.747299	0.736	0.981	1.12063e-27	45
RPS20	8.35384e-32	-0.53098	0.978	1	1.19393e-27	45
ERN2	9.0076e-32	0.586008	0.303	0.015	1.28737e-27	45
ENSSSCG00000006081	1.14022e-31	-0.584008	0.801	0.985	1.6296e-27	45
GLUL	1.84319e-31	1.06881	0.649	0.297	2.63429e-27	45
ENSSSCG00000004489	1.8874e-31	-0.57172	0.991	1	2.69747e-27	45
RPS17	2.41742e-31	-0.625919	0.926	0.998	3.45498e-27	45
ST6GALNAC1	2.5863e-31	0.506975	0.329	0.025	3.69634e-27	45
RACK1	2.6528e-31	-0.637065	0.779	0.977	3.79138e-27	45
CLDN3	3.02493e-31	0.941824	0.905	0.747	4.32322e-27	45
ENSSSCG00000039544	3.35473e-31	-0.591182	0.818	0.994	4.79458e-27	45
ENSSSCG00000013889	3.80742e-31	-0.628301	0.896	0.992	5.44157e-27	45
ENSSSCG00000022258	4.48693e-31	-1.50154	0.03	0.479	6.41272e-27	45
GLUD1	4.714e-31	-0.584098	0.281	0.755	6.73724e-27	45
ENSSSCG00000012074	4.88914e-31	0.875344	0.511	0.143	6.98756e-27	45
ENSSSCG00000020830	5.00952e-31	-0.598798	0.853	0.99	7.1596e-27	45
FAM177B	6.34603e-31	0.436547	0.286	0.01	9.06975e-27	45
PDXK	7.6765e-31	-0.67341	0.199	0.672	1.09713e-26	45
RPS3A	7.76041e-31	-0.673289	0.814	0.996	1.10912e-26	45
RPS15	8.21665e-31	-0.553342	0.952	0.996	1.17432e-26	45
COX4I1	9.16057e-31	-0.437338	0.991	0.994	1.30923e-26	45
UQCRC2	9.49792e-31	-0.490934	0.273	0.749	1.35744e-26	45
SELENOM	1.07258e-30	0.844345	0.545	0.145	1.53293e-26	45
PKIG	1.18732e-30	-0.510256	0.13	0.633	1.69691e-26	45
ENSSSCG00000035768	1.49863e-30	-0.699177	0.866	0.992	2.14184e-26	45
EEF1D	1.90119e-30	-0.655878	0.545	0.911	2.71718e-26	45
ENSSSCG00000024974	1.96921e-30	-0.618335	0.81	0.996	2.81439e-26	45
LRRC31	2.04212e-30	0.527375	0.277	0.008	2.91859e-26	45
HES2	2.43502e-30	0.541968	0.277	0.008	3.48014e-26	45
ENSSSCG00000034072	2.49323e-30	-0.721528	0.727	0.973	3.56333e-26	45
SERHL2	2.91918e-30	-0.554927	0.203	0.703	4.17209e-26	45
RHOV	3.63814e-30	0.662539	0.364	0.048	5.19963e-26	45
CA8	4.19523e-30	0.442379	0.286	0.012	5.99582e-26	45
ENSSSCG00000013064	4.40673e-30	-0.579532	0.827	0.988	6.2981e-26	45
RPS9	5.05392e-30	-0.599383	0.887	0.99	7.22306e-26	45
COX7C	6.95557e-30	-0.488518	0.883	0.988	9.94089e-26	45
ALDH2	7.00518e-30	-0.400575	0.139	0.651	1.00118e-25	45
ENSSSCG00000039046	9.83787e-30	-0.658936	0.649	0.975	1.40603e-25	45
ENSSSCG00000011272	1.1364e-29	-0.597155	0.874	0.994	1.62414e-25	45
ENSSSCG00000035762	1.36523e-29	-0.579367	0.411	0.828	1.95118e-25	45
ENSSSCG00000009138	2.34345e-29	-0.733471	0.16	0.674	3.34926e-25	45
ENSSSCG00000038570	3.10436e-29	-0.643662	0.121	0.585	4.43675e-25	45
ATP5PO	3.41869e-29	-0.569908	0.74	0.94	4.88599e-25	45
ENSSSCG00000029990	6.08514e-29	1.01398	0.329	0.033	8.69688e-25	45
ENSSSCG00000025928	6.60514e-29	-0.497849	0.935	0.994	9.44006e-25	45
RASD1	6.72181e-29	0.773468	0.277	0.012	9.60681e-25	45
KXD1	6.73735e-29	-0.496094	0.935	0.996	9.62901e-25	45
ENSSSCG00000024911	6.87264e-29	-0.994763	0.104	0.548	9.82238e-25	45
ENSSSCG00000033019	7.23406e-29	-0.655231	0.745	0.983	1.03389e-24	45
ARF4	7.79795e-29	0.938049	0.827	0.828	1.11448e-24	45
CHST4	8.89919e-29	0.690946	0.437	0.098	1.27187e-24	45
ND2	9.41788e-29	-0.804336	0.913	0.973	1.346e-24	45
UQCR10	1.02925e-28	-0.638381	0.589	0.886	1.471e-24	45
ENSSSCG00000003042	1.35566e-28	-0.510579	0.896	0.996	1.93751e-24	45
SMIM14	1.41533e-28	0.918095	0.628	0.32	2.02279e-24	45
CORO2A	1.63361e-28	-0.602106	0.104	0.56	2.33476e-24	45
RPS11	1.76942e-28	-0.520803	0.913	1	2.52885e-24	45
SLC51A	1.80212e-28	-0.943875	0.095	0.556	2.57558e-24	45
RPSA	2.34954e-28	-0.643149	0.861	0.992	3.35796e-24	45
ENSSSCG00000031553	2.48209e-28	-0.825887	0.216	0.67	3.54741e-24	45
EGR1	2.65517e-28	0.892726	0.848	0.718	3.79477e-24	45
RPLP0	3.014e-28	-0.56248	0.935	0.996	4.30761e-24	45
RPL17-C18orf32	3.09237e-28	-0.644036	0.797	0.979	4.41962e-24	45
ENSSSCG00000014855	3.15607e-28	-0.555936	0.97	0.998	4.51065e-24	45
RPL37	4.48799e-28	-0.567645	0.797	0.998	6.41423e-24	45
AKR7A2	5.9781e-28	-0.522991	0.195	0.658	8.5439e-24	45
SLC12A8	6.20596e-28	0.345574	0.251	0.006	8.86956e-24	45
RPL7A	7.04665e-28	-0.561748	0.866	0.998	1.00711e-23	45
ND1	7.823e-28	-0.7781	0.771	0.944	1.11806e-23	45
PLA2G10	8.98591e-28	1.04946	0.524	0.201	1.28427e-23	45
EEF1B2	9.54614e-28	-0.659302	0.797	0.973	1.36433e-23	45
ENSSSCG00000017509	1.02883e-27	-0.552415	0.918	0.996	1.47041e-23	45
GSDMD	1.2484e-27	-0.528963	0.229	0.676	1.78422e-23	45
ENSSSCG00000039460	1.44285e-27	-0.623212	0.853	0.992	2.06212e-23	45
S100G	1.55497e-27	-1.4038	0.074	0.481	2.22237e-23	45
MALL	1.60039e-27	-0.483139	0.052	0.496	2.28727e-23	45
ENSSSCG00000010517	2.3735e-27	-0.584988	0.39	0.79	3.3922e-23	45
ENSSSCG00000013436	3.40896e-27	-0.612227	0.576	0.876	4.87208e-23	45
MCF2L	3.45704e-27	0.563776	0.32	0.035	4.9408e-23	45
HSD11B1L	3.79935e-27	-0.54338	0.87	1	5.43003e-23	45
ENSSSCG00000030300	3.8429e-27	-0.910257	0.199	0.647	5.49227e-23	45
COX7B	4.6399e-27	-0.564557	0.853	0.975	6.63134e-23	45
H3F3B	5.40565e-27	0.592079	0.996	0.99	7.72575e-23	45
COX8A	6.11483e-27	-0.449081	0.896	0.983	8.73932e-23	45
MRPL12	8.52434e-27	-0.543733	0.407	0.815	1.2183e-22	45
MGST1	1.01985e-26	-0.556724	0.727	0.923	1.45757e-22	45
ENSSSCG00000008170	1.17493e-26	-0.543053	0.831	0.99	1.67921e-22	45
TST	1.22593e-26	-0.533232	0.19	0.647	1.75209e-22	45
ENSSSCG00000027665	1.90267e-26	-0.430378	0.035	0.438	2.71929e-22	45
ND3	2.5659e-26	-0.657741	0.727	0.9	3.66718e-22	45
EXT1	3.66166e-26	-0.469309	0.104	0.539	5.23325e-22	45
ENSSSCG00000004945	3.88639e-26	-0.600842	0.697	0.963	5.55443e-22	45
ENSSSCG00000034019	4.62499e-26	-0.495393	0.779	0.954	6.61003e-22	45
RPS5	6.23424e-26	-0.538279	0.892	0.983	8.90997e-22	45
C3	6.53273e-26	-1.38213	0.147	0.558	9.33658e-22	45
ENSSSCG00000002550	7.11724e-26	-0.468924	0.814	0.95	1.0172e-21	45
CBLIF	7.45162e-26	0.485889	0.221	0.002	1.06499e-21	45
ATP6	8.64456e-26	-0.583298	0.991	0.983	1.23548e-21	45
DHRS9	8.87921e-26	0.518705	0.286	0.027	1.26902e-21	45
ENSSSCG00000036114	9.52184e-26	-0.6716	0.576	0.89	1.36086e-21	45
ENSSSCG00000027085	9.53623e-26	-0.463011	0.463	0.84	1.36292e-21	45
GSTA2	1.06818e-25	-0.828741	0.061	0.473	1.52665e-21	45
CDA	1.10614e-25	0.57258	0.247	0.01	1.58089e-21	45
ENSSSCG00000032166	1.11465e-25	-0.504803	0.684	0.925	1.59305e-21	45
GSDMC	1.1529e-25	1.25307	0.433	0.124	1.64772e-21	45
BDH2	1.19623e-25	-0.350562	0.1	0.535	1.70966e-21	45
SYT7	1.8222e-25	0.429348	0.255	0.015	2.60429e-21	45
ENSSSCG00000006932	1.97866e-25	-0.733175	0.087	0.51	2.8279e-21	45
AKR1A1	1.98655e-25	-0.512015	0.411	0.817	2.83917e-21	45
RPS14	2.22336e-25	-0.544464	0.848	0.988	3.17763e-21	45
EDN1	3.39067e-25	-0.622268	0.043	0.436	4.84595e-21	45
CRYZ	3.52817e-25	-0.389937	0.078	0.492	5.04246e-21	45
KARS	4.53377e-25	-0.480876	0.42	0.859	6.47966e-21	45
ENSSSCG00000014075	5.62065e-25	-0.436278	0.437	0.849	8.03304e-21	45
EPHX2	5.80701e-25	-0.383431	0.013	0.388	8.29938e-21	45
TPT1	8.53277e-25	-0.397675	0.983	0.998	1.2195e-20	45
FCGRT	9.11388e-25	-0.442568	0.797	0.938	1.30256e-20	45
ENSSSCG00000033500	1.13462e-24	-0.505374	0.68	0.956	1.6216e-20	45
ENSSSCG00000001447	1.88729e-24	-0.421938	0.121	0.554	2.69732e-20	45
SI	2.36794e-24	-1.19788	0.203	0.608	3.38426e-20	45
S100A14	2.86744e-24	1.08984	0.792	0.703	4.09814e-20	45
ENSSSCG00000040056	2.86746e-24	-0.675608	0.277	0.695	4.09817e-20	45
VDAC3	3.4232e-24	-0.459298	0.333	0.739	4.89244e-20	45
RPL23	4.18415e-24	-0.531268	0.887	0.998	5.97999e-20	45
NTAN1	5.18231e-24	-0.393896	0.281	0.737	7.40655e-20	45
SERPINB5	5.21269e-24	0.3943	0.225	0.008	7.44998e-20	45
ENSSSCG00000023264	6.21652e-24	-0.516644	0.325	0.705	8.88465e-20	45
ENSSSCG00000010893	6.44346e-24	-0.677217	0.143	0.562	9.209e-20	45
ENSSSCG00000035538	7.11363e-24	-0.540284	0.571	0.865	1.01668e-19	45
TUBB2B	8.43768e-24	0.899456	0.61	0.311	1.20591e-19	45
ENSSSCG00000037030	9.23931e-24	-0.531458	0.874	0.988	1.32048e-19	45
LGALS4	9.81134e-24	0.604028	0.957	0.782	1.40224e-19	45
ZFP36	1.11207e-23	0.658837	0.918	0.853	1.58937e-19	45
LAP3	1.1687e-23	-0.45565	0.29	0.743	1.67031e-19	45
CHCHD10	1.19805e-23	-0.584662	0.385	0.741	1.71225e-19	45
GLOD5	1.38375e-23	-0.413499	0.061	0.459	1.97765e-19	45
NDUFC2	1.50943e-23	-0.505162	0.61	0.894	2.15727e-19	45
CLDN2	2.02797e-23	-0.467561	0.061	0.442	2.89837e-19	45
GUCA2A	2.13098e-23	2.55551	0.364	0.077	3.04559e-19	45
ENSSSCG00000036296	2.35205e-23	-0.500399	0.84	0.992	3.36155e-19	45
ENSSSCG00000009239	2.63669e-23	0.767156	0.247	0.019	3.76835e-19	45
ENSSSCG00000013597	2.63865e-23	-0.443485	0.9	0.998	3.77115e-19	45
ENSSSCG00000024776	2.94114e-23	-0.578955	0.455	0.82	4.20348e-19	45
ENSSSCG00000035686	4.28745e-23	-0.562264	0.368	0.743	6.12763e-19	45
NDUFA11	5.96234e-23	-0.509765	0.424	0.799	8.52138e-19	45
HADHA	6.24123e-23	-0.396735	0.26	0.687	8.91996e-19	45
ACADM	7.52253e-23	-0.414454	0.234	0.654	1.07512e-18	45
ERH	9.36768e-23	-0.503587	0.563	0.884	1.33883e-18	45
DGAT2	1.10977e-22	0.392067	0.208	0.006	1.58608e-18	45
NR1H4	1.28217e-22	-0.62758	0.147	0.571	1.83247e-18	45
TSC22D1	1.31597e-22	0.804799	0.771	0.705	1.88078e-18	45
PYCR1	1.33233e-22	0.592204	0.372	0.091	1.90417e-18	45
APP	1.48108e-22	1.00244	0.788	0.695	2.11675e-18	45
HDGF	1.52364e-22	-0.401198	0.199	0.618	2.17759e-18	45
ATP5PB	1.65914e-22	-0.466068	0.727	0.94	2.37124e-18	45
HNF4G	2.039e-22	-0.603631	0.234	0.633	2.91413e-18	45
ENSSSCG00000013380	2.08963e-22	0.799936	0.519	0.205	2.9865e-18	45
ENSSSCG00000036716	2.13461e-22	-0.408815	0.935	0.998	3.05079e-18	45
CRYL1	2.3748e-22	-0.447593	0.277	0.67	3.39407e-18	45
SPAI-2	2.506e-22	-1.93555	0.329	0.67	3.58157e-18	45
PABPC1	2.82039e-22	-0.527783	0.727	0.944	4.03091e-18	45
PAQR8	3.069e-22	0.330801	0.212	0.008	4.38621e-18	45
SEMA6D	3.13432e-22	-0.385468	0.022	0.369	4.47957e-18	45
ENSSSCG00000002004	4.69963e-22	-0.45239	0.714	0.932	6.71671e-18	45
EIF3H	5.37625e-22	-0.4303	0.524	0.878	7.68374e-18	45
FBP2	6.49109e-22	-0.352683	0.065	0.438	9.27707e-18	45
PPP1R15A	6.51241e-22	0.726703	0.857	0.805	9.30753e-18	45
FH	6.59238e-22	-0.394088	0.286	0.716	9.42183e-18	45
ADORA2A	7.10429e-22	0.381364	0.195	0.004	1.01534e-17	45
ENSSSCG00000006395	7.63864e-22	0.879452	0.805	0.832	1.09171e-17	45
AVPI1	9.21232e-22	-0.46248	0.199	0.593	1.31663e-17	45
SDCBP2	1.01191e-21	0.958664	0.628	0.363	1.44622e-17	45
HSP90AB1	1.01777e-21	-0.535104	0.658	0.965	1.4546e-17	45
NDUFB6	1.02358e-21	-0.44732	0.398	0.786	1.4629e-17	45
MDH1	1.06171e-21	-0.422246	0.355	0.778	1.51739e-17	45
RPL3	1.07074e-21	-0.533603	0.861	0.973	1.53031e-17	45
ENSSSCG00000035048	1.16862e-21	-0.457214	0.251	0.643	1.6702e-17	45
ENSSSCG00000016100	1.27009e-21	-0.459838	0.654	0.896	1.81521e-17	45
S100A6	1.35905e-21	1.25945	0.84	0.803	1.94235e-17	45
CALM3	1.46526e-21	-0.515721	0.667	0.84	2.09415e-17	45
EPHX1	1.51885e-21	-0.420562	0.095	0.488	2.17074e-17	45
NLRP6	1.72932e-21	-0.371558	0.056	0.415	2.47155e-17	45
ENSSSCG00000000405	1.73802e-21	-0.488179	0.861	0.934	2.48398e-17	45
UPB1	1.82465e-21	0.259032	0.177	0	2.60779e-17	45
SNRPE	1.99335e-21	-0.552486	0.602	0.873	2.84889e-17	45
CXCL8	2.06949e-21	1.40958	0.645	0.423	2.95772e-17	45
GAST	2.11364e-21	0.543968	0.19	0.004	3.02082e-17	45
ND5	2.15958e-21	-0.462978	0.684	0.925	3.08648e-17	45
ENSSSCG00000035080	2.655e-21	-0.449919	0.913	1	3.79453e-17	45
PDZK1	3.33321e-21	-0.896393	0.143	0.521	4.76383e-17	45
ENSSSCG00000014540	3.49877e-21	-0.578702	0.978	1	5.00045e-17	45
ITM2C	3.58775e-21	0.891297	0.805	0.71	5.12761e-17	45
CYTB	3.6811e-21	-0.538699	0.957	0.977	5.26102e-17	45
ENSSSCG00000012961	4.01957e-21	-0.527175	0.641	0.911	5.74476e-17	45
TM4SF4	4.39663e-21	0.825116	0.823	0.583	6.28367e-17	45
COX3	4.8642e-21	-0.496504	0.991	0.981	6.95192e-17	45
HHLA2	5.29225e-21	-0.442695	0.082	0.459	7.56369e-17	45
MPC2	5.32489e-21	-0.423851	0.403	0.795	7.61033e-17	45
ENSSSCG00000033537	5.41287e-21	0.349539	0.199	0.008	7.73608e-17	45
TXNRD1	5.67776e-21	-0.381555	0.229	0.635	8.11466e-17	45
SPAG8	5.72796e-21	-0.377505	0.277	0.656	8.1864e-17	45
SERPINA1	5.93777e-21	0.283841	0.173	0	8.48626e-17	45
COX6A1	6.31229e-21	-0.405103	0.853	0.973	9.02153e-17	45
SLC5A6	6.5665e-21	-0.337502	0.03	0.367	9.38484e-17	45
ITPRID2	7.40802e-21	1.02904	0.697	0.492	1.05875e-16	45
NDUFS3	7.53506e-21	-0.440376	0.342	0.734	1.07691e-16	45
ENSSSCG00000035736	8.96504e-21	-0.557043	0.026	0.349	1.28128e-16	45
PHB2	1.04451e-20	-0.432942	0.329	0.749	1.49281e-16	45
ENSSSCG00000033716	1.05756e-20	-0.527915	0.216	0.604	1.51146e-16	45
CD63	1.15394e-20	0.628058	0.87	0.932	1.64922e-16	45
HSPA8	1.17547e-20	-0.46595	0.918	1	1.67998e-16	45
TMSB10	1.34796e-20	0.703376	0.974	0.896	1.92651e-16	45
AKR1E2	1.42295e-20	-0.423495	0.074	0.425	2.03368e-16	45
UQCRQ	1.52488e-20	-0.476278	0.701	0.902	2.17936e-16	45
CASP3	1.61303e-20	-0.498939	0.281	0.651	2.30534e-16	45
DEGS2	1.76132e-20	-0.403797	0.255	0.656	2.51729e-16	45
GLS	1.88333e-20	-0.406229	0.143	0.523	2.69165e-16	45
NDUFV1	1.88444e-20	-0.368208	0.312	0.705	2.69324e-16	45
CLTA	2.19616e-20	-0.486183	0.71	0.915	3.13875e-16	45
SERPINF2	2.24971e-20	0.860692	0.636	0.442	3.21529e-16	45
NDUFA10	2.55068e-20	-0.36527	0.268	0.672	3.64544e-16	45
SDHB	2.88567e-20	-0.433074	0.528	0.861	4.1242e-16	45
ASRGL1	2.9199e-20	-0.442423	0.29	0.687	4.17312e-16	45
AREG	2.97477e-20	1.47439	0.545	0.311	4.25154e-16	45
NDUFS6	3.36227e-20	-0.461713	0.455	0.79	4.80536e-16	45
YBX3	3.6106e-20	-0.451413	0.091	0.434	5.16026e-16	45
NDUFS5	3.86508e-20	-0.411659	0.628	0.915	5.52397e-16	45
CHST9	3.94414e-20	0.289946	0.173	0.002	5.63697e-16	45
SDF4	4.63128e-20	0.717519	0.753	0.676	6.61902e-16	45
SDHD	4.88841e-20	-0.345649	0.519	0.824	6.98652e-16	45
MMP3	5.52891e-20	-1.90855	0.022	0.334	7.90192e-16	45
CASP1	5.66161e-20	-0.591001	0.346	0.687	8.09157e-16	45
ENSSSCG00000010158	5.75645e-20	-0.453747	0.385	0.763	8.22712e-16	45
ENSSSCG00000037677	5.95513e-20	-0.660277	0.134	0.506	8.51107e-16	45
NDUFB10	6.33296e-20	-0.415441	0.459	0.832	9.05107e-16	45
MRPL11	6.38235e-20	-0.403204	0.229	0.616	9.12166e-16	45
ISG15	6.63898e-20	1.4675	0.792	0.649	9.48843e-16	45
MRPS12	6.93664e-20	-0.280029	0.186	0.589	9.91385e-16	45
BRI3BP	8.27095e-20	-0.461866	0.195	0.575	1.18208e-15	45
XPNPEP2	8.29395e-20	-0.592822	0.056	0.392	1.18537e-15	45
ENSSSCG00000022187	8.33482e-20	-0.279623	0.152	0.558	1.19121e-15	45
ENSSSCG00000038808	9.63887e-20	-0.358125	0.03	0.357	1.37759e-15	45
ENSSSCG00000027921	1.02755e-19	-0.52211	0.303	0.662	1.46858e-15	45
ENSSSCG00000001734	1.09557e-19	-0.388752	0.104	0.469	1.56578e-15	45
FAM131C	1.2438e-19	0.488564	0.264	0.041	1.77764e-15	45
RHEB	1.26261e-19	-0.438441	0.329	0.72	1.80452e-15	45
SPINT2	1.39131e-19	0.526306	0.866	0.761	1.98846e-15	45
HSPA9	1.44702e-19	-0.409782	0.273	0.668	2.06808e-15	45
MT1A	1.7549e-19	-0.565989	0.035	0.359	2.5081e-15	45
SLC5A8	1.93494e-19	-0.411613	0.03	0.342	2.76542e-15	45
ATP5F1C	2.49698e-19	-0.426627	0.632	0.905	3.56868e-15	45
ENPEP	2.52649e-19	-0.674537	0.195	0.579	3.61086e-15	45
C1orf115	2.80706e-19	-0.355138	0.19	0.571	4.01185e-15	45
MICOS10	2.89456e-19	-0.348938	0.732	0.94	4.13691e-15	45
MRPL55	3.04952e-19	-0.381186	0.346	0.726	4.35838e-15	45
HSPH1	3.23433e-19	-0.463092	0.281	0.703	4.62251e-15	45
CYB5A	3.53079e-19	-0.361636	0.359	0.732	5.04621e-15	45
ATF4	3.87454e-19	0.595872	0.857	0.878	5.53749e-15	45
C5	4.02036e-19	-0.4935	0.069	0.394	5.7459e-15	45
SLIRP	4.08093e-19	-0.370477	0.333	0.728	5.83247e-15	45
SCG2	4.1244e-19	1.87016	0.165	0.002	5.8946e-15	45
HKDC1	4.32109e-19	-0.409574	0.056	0.392	6.1757e-15	45
RETNLB	4.40955e-19	1.54445	0.195	0.012	6.30213e-15	45
HSP90AA1	4.46458e-19	-0.607066	0.861	0.985	6.38077e-15	45
TUFM	4.48722e-19	-0.302883	0.16	0.525	6.41313e-15	45
MYO5C	4.62692e-19	0.398608	0.221	0.023	6.61279e-15	45
ENSSSCG00000038825	5.14469e-19	0.868549	0.693	0.573	7.35279e-15	45
NDUFA13	5.2148e-19	-0.353408	0.714	0.925	7.453e-15	45
ENSSSCG00000029160	5.74673e-19	-0.529436	0.532	0.855	8.21322e-15	45
SCARB2	6.09568e-19	-0.384796	0.199	0.589	8.71194e-15	45
LSM3	6.7282e-19	-0.477049	0.225	0.554	9.61594e-15	45
GALM	6.73727e-19	-0.337595	0.095	0.442	9.62891e-15	45
RASSF1	7.06618e-19	0.698211	0.606	0.382	1.0099e-14	45
MRPS15	7.5467e-19	-0.322434	0.212	0.614	1.07857e-14	45
NFE2L2	7.98669e-19	-0.392576	0.325	0.707	1.14146e-14	45
MAF	8.14329e-19	-0.438951	0.035	0.351	1.16384e-14	45
CLPS	8.59254e-19	0.283343	0.169	0.004	1.22805e-14	45
MAOB	9.34058e-19	-0.331793	0.091	0.452	1.33496e-14	45
ENSSSCG00000011764	1.33645e-18	-0.375404	0.511	0.811	1.91006e-14	45
ENSSSCG00000027013	1.39875e-18	-0.35866	0.087	0.425	1.99909e-14	45
ENSSSCG00000020686	1.56125e-18	-0.320726	0.316	0.716	2.23135e-14	45
PARM1	1.69293e-18	0.473662	0.229	0.029	2.41954e-14	45
ENTPD8	1.72425e-18	0.649859	0.32	0.079	2.4643e-14	45
EIF4EBP2	1.73016e-18	-0.318641	0.126	0.485	2.47274e-14	45
POLR2F	1.78733e-18	-0.439062	0.329	0.714	2.55445e-14	45
FOXA1	1.90565e-18	0.720385	0.459	0.199	2.72356e-14	45
ENSSSCG00000032990	2.02288e-18	-0.423611	0.1	0.438	2.8911e-14	45
CCDC142	2.3108e-18	-0.359521	0.238	0.627	3.30259e-14	45
RAB27B	2.47412e-18	0.719529	0.485	0.237	3.53601e-14	45
PCSK1	2.49064e-18	1.36713	0.165	0.004	3.55962e-14	45
KHK	2.56077e-18	-0.599791	0.165	0.525	3.65985e-14	45
ENSSSCG00000000071	2.79833e-18	-0.405816	0.602	0.925	3.99937e-14	45
SLC25A3	2.83789e-18	-0.366578	0.866	0.965	4.05592e-14	45
PNP	3.32343e-18	0.955919	0.68	0.562	4.74984e-14	45
NME1	3.35787e-18	-0.505721	0.234	0.583	4.79907e-14	45
COL28A1	3.58689e-18	0.470732	0.221	0.027	5.12639e-14	45
NDUFC1	3.92173e-18	-0.419246	0.502	0.801	5.60494e-14	45
CHGA	4.35489e-18	3.6899	0.186	0.012	6.22401e-14	45
ENSSSCG00000035797	4.50536e-18	-0.329327	0.026	0.324	6.43906e-14	45
ACE2	4.53749e-18	-0.579808	0.056	0.371	6.48499e-14	45
ALDH1B1	5.42224e-18	-0.307098	0.134	0.479	7.74947e-14	45
ENSSSCG00000003225	6.55278e-18	-0.419411	0.199	0.558	9.36523e-14	45
CD99	6.72105e-18	-0.671741	0.221	0.566	9.60573e-14	45
HK2	6.86687e-18	0.431236	0.26	0.048	9.81413e-14	45
ENSSSCG00000033068	7.49798e-18	-0.431423	0.524	0.855	1.07161e-13	45
SLC4A7	7.58276e-18	0.449893	0.411	0.143	1.08373e-13	45
SERBP1	7.93801e-18	-0.457326	0.558	0.871	1.1345e-13	45
CACYBP	8.1327e-18	-0.431383	0.429	0.784	1.16233e-13	45
IDH3A	8.80684e-18	-0.305816	0.152	0.521	1.25867e-13	45
ETFB	9.73443e-18	-0.363732	0.394	0.73	1.39124e-13	45
ENSSSCG00000015337	1.07984e-17	-0.365352	0.662	0.917	1.54331e-13	45
ABCG1	1.17952e-17	0.364314	0.173	0.008	1.68577e-13	45
GBA3	1.18419e-17	-0.297219	0.091	0.432	1.69245e-13	45
AGPS	1.24915e-17	-0.321746	0.147	0.496	1.78529e-13	45
ETFA	1.28314e-17	-0.319348	0.355	0.72	1.83386e-13	45
PHB	1.29528e-17	-0.390491	0.325	0.683	1.85122e-13	45
TNFRSF21	1.30084e-17	0.984126	0.476	0.23	1.85916e-13	45
DAO	1.3339e-17	-0.428125	0.017	0.299	1.9064e-13	45
ENSSSCG00000013661	1.87349e-17	-0.333121	0.524	0.861	2.67759e-13	45
LAD1	1.95453e-17	-0.494165	0.372	0.687	2.79342e-13	45
SNRNP25	2.28645e-17	-0.316578	0.182	0.541	3.2678e-13	45
TMEM63A	2.29776e-17	0.445887	0.281	0.062	3.28396e-13	45
GPX3	2.31988e-17	0.456228	0.368	0.093	3.31557e-13	45
ABCA5	2.33563e-17	-0.304235	0.087	0.402	3.33808e-13	45
ENSSSCG00000011676	2.34325e-17	-0.442657	0.156	0.483	3.34897e-13	45
IMMT	2.43612e-17	-0.250857	0.165	0.546	3.4817e-13	45
HADH	2.53377e-17	-0.311006	0.19	0.554	3.62127e-13	45
EIF1AX	2.70515e-17	-0.364755	0.264	0.614	3.86621e-13	45
CANX	2.76186e-17	-0.369742	0.61	0.898	3.94725e-13	45
FAM83E	2.98952e-17	0.585322	0.381	0.135	4.27262e-13	45
ND4	3.29979e-17	-0.456161	0.978	0.967	4.71606e-13	45
SAT1	3.39692e-17	0.588282	0.913	0.923	4.85487e-13	45
ENSSSCG00000000849	3.49827e-17	-0.412465	0.706	0.919	4.99973e-13	45
SOD1	3.56031e-17	-0.425442	0.654	0.913	5.0884e-13	45
PLIN2	3.62278e-17	-0.413749	0.065	0.363	5.17768e-13	45
STXBP1	3.63914e-17	0.303787	0.221	0.027	5.20106e-13	45
NT5C	3.87974e-17	-0.312565	0.195	0.546	5.54493e-13	45
GUCA2B	3.93745e-17	1.77825	0.251	0.044	5.62741e-13	45
SUCLA2	4.62944e-17	-0.294733	0.087	0.413	6.6164e-13	45
GPD1	4.9358e-17	-0.371046	0.472	0.811	7.05425e-13	45
ENSSSCG00000013366	4.97912e-17	-0.431233	0.654	0.867	7.11615e-13	45
ENSSSCG00000002907	5.03113e-17	-0.372625	0.861	0.952	7.19049e-13	45
TXNDC17	5.44283e-17	-0.401052	0.632	0.869	7.77889e-13	45
LSM7	5.5835e-17	-0.298669	0.234	0.591	7.97993e-13	45
CDC42EP5	5.72914e-17	0.679264	0.701	0.635	8.18809e-13	45
LXN	5.90525e-17	-0.310129	0.195	0.564	8.43978e-13	45
CYC1	6.21777e-17	-0.458387	0.563	0.834	8.88644e-13	45
GPRL15	6.24246e-17	0.939694	0.597	0.45	8.92172e-13	45
MRPS26	6.38665e-17	-0.332953	0.134	0.469	9.12781e-13	45
DHX32	6.44797e-17	0.536525	0.381	0.131	9.21544e-13	45
ENSSSCG00000038187	6.90241e-17	0.882125	0.545	0.346	9.86492e-13	45
EBPL	8.40433e-17	-0.31799	0.095	0.411	1.20115e-12	45
RPS27	8.85841e-17	-0.359061	0.965	0.998	1.26604e-12	45
ENSSSCG00000032556	9.88744e-17	0.545316	0.952	0.956	1.41311e-12	45
CA13	1.00644e-16	-0.305945	0.03	0.311	1.43841e-12	45
PRDX3	1.00738e-16	-0.323483	0.338	0.726	1.43975e-12	45
TMEM176B	1.10147e-16	0.567634	0.762	0.6	1.57422e-12	45
ENSSSCG00000033906	1.13037e-16	-1.04161	0.026	0.295	1.61552e-12	45
COX7A2	1.19672e-16	-0.36599	0.883	0.959	1.71036e-12	45
APRT	1.22863e-16	-0.319568	0.121	0.44	1.75596e-12	45
CSDE1	1.29131e-16	-0.33406	0.333	0.722	1.84554e-12	45
ENSSSCG00000033414	1.37217e-16	-0.327163	0.074	0.384	1.96111e-12	45
PIGR	1.40541e-16	-1.16144	0.069	0.355	2.00861e-12	45
ENSSSCG00000002709	1.4288e-16	0.255638	0.143	0.002	2.04205e-12	45
AQP11	1.46314e-16	-0.302397	0.121	0.454	2.09112e-12	45
ENSSSCG00000032067	1.48586e-16	-0.351076	0.203	0.548	2.12359e-12	45
PSMB8	1.55766e-16	-0.366001	0.771	0.932	2.22621e-12	45
SNRPD1	1.60802e-16	-0.43927	0.472	0.782	2.29818e-12	45
SSR4	1.88817e-16	-0.441547	0.74	0.909	2.69857e-12	45
NAALADL1	1.95468e-16	-0.725012	0.26	0.595	2.79362e-12	45
ENSSSCG00000033787	2.01908e-16	-0.286039	0.026	0.299	2.88567e-12	45
COA3	2.09813e-16	-0.341875	0.411	0.782	2.99865e-12	45
CHGB	2.13281e-16	2.76053	0.134	0	3.04821e-12	45
SLC38A11	2.13281e-16	0.559016	0.134	0	3.04821e-12	45
SGSM3	2.15845e-16	0.518174	0.372	0.129	3.08486e-12	45
DDX21	2.49048e-16	-0.294747	0.134	0.461	3.55939e-12	45
ENSSSCG00000034527	2.58951e-16	-0.311901	0.42	0.776	3.70093e-12	45
MRPS28	2.65454e-16	-0.265112	0.048	0.336	3.79387e-12	45
ENSSSCG00000040785	2.67083e-16	-0.313568	0.056	0.359	3.81716e-12	45
ENSSSCG00000038475	2.90052e-16	-0.250366	0.056	0.346	4.14542e-12	45
NUCKS1	2.97373e-16	-0.517346	0.459	0.776	4.25005e-12	45
SUCLG2	3.01221e-16	-0.326074	0.481	0.803	4.30505e-12	45
LGMN	3.09719e-16	-0.423507	0.139	0.473	4.42651e-12	45
MPP1	3.15376e-16	-0.531554	0.182	0.515	4.50736e-12	45
SLC7A7	3.20288e-16	-0.373954	0.074	0.363	4.57756e-12	45
PCSK5	3.32611e-16	-0.264082	0.035	0.313	4.75367e-12	45
ENSSSCG00000032003	3.43883e-16	-0.344756	0.931	0.992	4.91478e-12	45
HINT1	3.82139e-16	-0.352972	0.866	0.963	5.46153e-12	45
EIF3F	3.92215e-16	-0.294483	0.186	0.537	5.60553e-12	45
STAP2	3.96117e-16	-0.32701	0.143	0.471	5.6613e-12	45
ENSSSCG00000025060	4.18451e-16	-0.330077	0.19	0.527	5.9805e-12	45
SPINK1	4.5927e-16	-1.03815	0.199	0.539	6.56388e-12	45
SAP18	4.66221e-16	-0.318429	0.675	0.929	6.66323e-12	45
NPM1	4.72833e-16	-0.545374	0.597	0.878	6.75773e-12	45
DUSP10	4.77624e-16	0.47178	0.398	0.154	6.8262e-12	45
NDUFB11	4.93414e-16	-0.337732	0.506	0.811	7.05187e-12	45
ENSSSCG00000034442	5.33507e-16	-0.277778	0.242	0.612	7.62488e-12	45
EIF3E	5.39436e-16	-0.291728	0.385	0.728	7.70961e-12	45
TIMM8A	5.60781e-16	-0.364298	0.069	0.355	8.01468e-12	45
ENSSSCG00000014031	5.71265e-16	-0.451193	0.407	0.701	8.16452e-12	45
RPL10A	5.79182e-16	-0.345506	0.238	0.577	8.27767e-12	45
CDKN2AIPNL	5.80215e-16	-0.325556	0.346	0.697	8.29243e-12	45
SF3B5	5.96475e-16	-0.25851	0.411	0.747	8.52482e-12	45
UPP1	6.10651e-16	0.779264	0.697	0.591	8.72742e-12	45
ALDOB	6.71293e-16	-1.02042	0.216	0.533	9.59412e-12	45
ENSSSCG00000035053	7.07215e-16	-1.02509	0.078	0.363	1.01075e-11	45
KDELR3	8.52832e-16	0.373903	0.316	0.087	1.21887e-11	45
GNE	8.62744e-16	0.621205	0.442	0.21	1.23303e-11	45
PTGER4	8.81454e-16	0.737929	0.476	0.245	1.25977e-11	45
MGAM	8.94786e-16	-0.717747	0.091	0.386	1.27883e-11	45
ARHGAP18	9.11124e-16	-0.307885	0.03	0.297	1.30218e-11	45
TNFSF15	1.06131e-15	-0.331078	0.004	0.245	1.51682e-11	45
PPA2	1.10442e-15	-0.347932	0.156	0.485	1.57844e-11	45
PLBD1	1.12002e-15	0.706927	0.403	0.166	1.60074e-11	45
ENSSSCG00000038711	1.39125e-15	-0.298588	0.338	0.699	1.98837e-11	45
ECHDC2	1.39657e-15	-0.298268	0.216	0.568	1.99598e-11	45
C6orf52	1.41907e-15	0.424393	0.199	0.027	2.02814e-11	45
ENSSSCG00000016737	1.42748e-15	-0.542546	0.913	0.975	2.04015e-11	45
LAMP2	1.53151e-15	-0.27626	0.242	0.598	2.18884e-11	45
MAPK6	1.6589e-15	-0.375616	0.433	0.763	2.3709e-11	45
PLIN3	1.67922e-15	-0.32031	0.108	0.423	2.39994e-11	45
NDUFA9	1.70713e-15	-0.364055	0.303	0.647	2.43983e-11	45
AOC1	1.75723e-15	-0.76769	0.104	0.39	2.51144e-11	45
ND6	1.75834e-15	-0.313482	0.186	0.537	2.51302e-11	45
ENSSSCG00000004572	1.79622e-15	1.05112	0.312	0.091	2.56716e-11	45
SELENOS	2.01487e-15	0.610871	0.753	0.73	2.87966e-11	45
RSL1D1	2.02024e-15	-0.355836	0.165	0.494	2.88733e-11	45
RTRAF	2.0402e-15	-0.382513	0.593	0.876	2.91585e-11	45
MAGED1	2.35215e-15	0.440035	0.329	0.104	3.36169e-11	45
TBCA	2.35632e-15	-0.268972	0.537	0.884	3.36765e-11	45
SAMD14	2.38384e-15	0.275251	0.152	0.008	3.40699e-11	45
TM4SF5	2.5696e-15	0.926807	0.42	0.197	3.67248e-11	45
DDT	2.76346e-15	-0.294125	0.511	0.817	3.94954e-11	45
POLR2E	2.85029e-15	-0.344907	0.346	0.676	4.07364e-11	45
GABRD	3.20973e-15	0.270827	0.139	0.004	4.58735e-11	45
TLE4	3.2888e-15	-0.303742	0.199	0.541	4.70035e-11	45
CCT2	3.32176e-15	-0.381361	0.494	0.809	4.74745e-11	45
LAPTM4B	3.40136e-15	-0.384556	0.199	0.517	4.86122e-11	45
ECI2	3.43964e-15	-0.25146	0.126	0.442	4.91593e-11	45
RARRES2	3.49956e-15	-0.779417	0.108	0.413	5.00157e-11	45
ENSSSCG00000034448	3.61137e-15	-0.335629	0.948	0.996	5.16137e-11	45
FBP1	3.86634e-15	-0.279914	0.13	0.444	5.52578e-11	45
DHDH	4.41136e-15	-0.361306	0.147	0.452	6.30471e-11	45
ENSSSCG00000029761	4.41636e-15	-0.261995	0.13	0.44	6.31186e-11	45
SNRPF	4.4536e-15	-0.420353	0.355	0.678	6.36509e-11	45
SNRPD3	4.57156e-15	-0.3099	0.468	0.776	6.53368e-11	45
TSFM	4.62831e-15	-0.254569	0.108	0.417	6.61478e-11	45
VLDLR	4.94195e-15	0.348631	0.229	0.041	7.06303e-11	45
PGRMC1	5.13732e-15	-0.309955	0.286	0.651	7.34226e-11	45
PMAIP1	5.3285e-15	0.785324	0.61	0.438	7.61549e-11	45
EPB41L3	5.37157e-15	-0.368923	0.048	0.311	7.67705e-11	45
ENSSSCG00000035669	5.55879e-15	0.363085	0.19	0.023	7.94462e-11	45
ENSSSCG00000006156	5.75685e-15	0.65286	0.74	0.674	8.22769e-11	45
MDH2	5.86691e-15	-0.341236	0.416	0.759	8.38498e-11	45
PSMB3	6.68437e-15	-0.323325	0.251	0.583	9.5533e-11	45
SYTL5	6.69559e-15	0.276001	0.121	0	9.56933e-11	45
GMDS	7.30393e-15	0.769949	0.667	0.62	1.04388e-10	45
GNA11	7.30927e-15	-0.426505	0.255	0.571	1.04464e-10	45
APPL2	7.38168e-15	0.526191	0.355	0.133	1.05499e-10	45
RNPEP	8.03978e-15	-0.266099	0.247	0.608	1.14905e-10	45
ENSSSCG00000005437	8.98652e-15	0.825575	0.753	0.749	1.28435e-10	45
PRELID2	9.00698e-15	-0.277039	0.03	0.278	1.28728e-10	45
ENSSSCG00000040857	9.14144e-15	-0.344288	0.455	0.776	1.30649e-10	45
SELENBP1	9.60242e-15	-0.312444	0.074	0.361	1.37238e-10	45
ENSSSCG00000017920	1.14658e-14	0.969252	0.424	0.212	1.63869e-10	45
ENSSSCG00000004446	1.15826e-14	-0.28918	0.455	0.79	1.65539e-10	45
NDUFS7	1.22036e-14	-0.312961	0.532	0.82	1.74413e-10	45
EIF4G2	1.26184e-14	-0.34903	0.623	0.917	1.80342e-10	45
RAN	1.29745e-14	-0.441486	0.68	0.909	1.85432e-10	45
C4BPA	1.31412e-14	-0.498196	0.307	0.676	1.87815e-10	45
NEDD9	1.4671e-14	0.715772	0.576	0.378	2.09677e-10	45
COQ9	1.51766e-14	-0.285365	0.165	0.473	2.16903e-10	45
LARP4	1.63176e-14	-0.27416	0.108	0.405	2.33212e-10	45
RAB27A	1.65781e-14	0.428499	0.338	0.118	2.36935e-10	45
ENSSSCG00000003080	1.68015e-14	0.995639	0.489	0.288	2.40128e-10	45
RAB3B	1.69586e-14	0.266929	0.126	0.002	2.42373e-10	45
BPNT1	1.84238e-14	-0.27907	0.216	0.556	2.63313e-10	45
NDUFB9	1.86525e-14	-0.364065	0.654	0.859	2.66582e-10	45
SLC9A3R2	1.90739e-14	0.331514	0.303	0.079	2.72604e-10	45
ICA1	1.91459e-14	0.335867	0.286	0.079	2.73633e-10	45
ENSSSCG00000032436	1.98087e-14	-1.19961	0.035	0.278	2.83106e-10	45
GOLM1	2.05698e-14	0.871943	0.61	0.498	2.93984e-10	45
ENSSSCG00000034731	2.10127e-14	0.872477	0.117	0	3.00313e-10	45
NEUROD1	2.10127e-14	0.728246	0.117	0	3.00313e-10	45
PDE2A	2.47945e-14	0.373609	0.277	0.066	3.54364e-10	45
ATP5F1E	2.49029e-14	-0.25825	0.887	0.996	3.55912e-10	45
RNF223	2.5443e-14	0.506592	0.238	0.054	3.63632e-10	45
ENSSSCG00000033212	2.58361e-14	-0.322427	0.541	0.822	3.6925e-10	45
INSIG1	2.67171e-14	0.785377	0.684	0.587	3.81841e-10	45
ATP5MD	2.75633e-14	-0.338308	0.736	0.917	3.93935e-10	45
SERTAD3	3.09652e-14	0.510267	0.468	0.245	4.42554e-10	45
ACP1	3.14142e-14	-0.29494	0.416	0.739	4.48972e-10	45
ENSSSCG00000038275	3.2841e-14	-0.301604	0.052	0.305	4.69363e-10	45
ENSSSCG00000038581	3.70451e-14	-0.272568	0.195	0.515	5.29448e-10	45
MCRIP2	3.91664e-14	-0.358861	0.299	0.61	5.59766e-10	45
UBC	4.08646e-14	0.4435	0.939	0.977	5.84037e-10	45
SLC30A10	4.18997e-14	-0.256319	0.061	0.33	5.9883e-10	45
OXCT1	4.31481e-14	-0.270358	0.281	0.627	6.16672e-10	45
MRPL40	4.35132e-14	-0.27637	0.372	0.705	6.2189e-10	45
COX2	4.43442e-14	-0.368601	0.991	0.981	6.33767e-10	45
SDHC	4.46108e-14	-0.309193	0.42	0.726	6.37578e-10	45
PLSCR4	4.47612e-14	-0.283232	0.013	0.241	6.39727e-10	45
KRT7	4.52897e-14	0.831153	0.121	0.002	6.47281e-10	45
ARHGEF10L	5.25253e-14	0.340318	0.169	0.019	7.50691e-10	45
FABP6	5.57117e-14	-1.38181	0.472	0.647	7.96232e-10	45
ENSSSCG00000007743	5.74107e-14	-0.289119	0.866	0.956	8.20514e-10	45
PSMB2	5.82234e-14	-0.343121	0.628	0.884	8.32129e-10	45
NDUFB8	5.95496e-14	-0.300313	0.571	0.853	8.51082e-10	45
ENSSSCG00000001075	6.29919e-14	-0.419596	0.355	0.666	9.0028e-10	45
JAG1	7.61228e-14	-0.263949	0.035	0.276	1.08795e-09	45
FAM3B	8.12976e-14	0.600817	0.758	0.627	1.16191e-09	45
ENSSSCG00000036675	8.42478e-14	0.306688	0.156	0.015	1.20407e-09	45
CRTAP	9.32578e-14	-0.28954	0.035	0.272	1.33284e-09	45
HNRNPU	9.58503e-14	-0.342042	0.489	0.801	1.36989e-09	45
ITPK1	9.80638e-14	-0.313299	0.281	0.616	1.40153e-09	45
PSMA7	1.00849e-13	-0.332405	0.706	0.923	1.44134e-09	45
IFI6	1.08129e-13	0.491921	0.931	0.844	1.54537e-09	45
MICOS13	1.16108e-13	-0.287216	0.381	0.699	1.65941e-09	45
ENSSSCG00000026064	1.16594e-13	-0.37649	0.312	0.62	1.66636e-09	45
PGP	1.20299e-13	-0.259791	0.091	0.369	1.71932e-09	45
ZCCHC17	1.21109e-13	-0.332765	0.234	0.546	1.7309e-09	45
FNTA	1.26091e-13	-0.265492	0.139	0.434	1.80209e-09	45
ANKRD40CL	1.33808e-13	-0.314071	0.013	0.237	1.91239e-09	45
ENSSSCG00000036603	1.34985e-13	0.483687	0.342	0.131	1.92921e-09	45
TOMM7	1.39088e-13	-0.283987	0.446	0.77	1.98785e-09	45
CPO	1.39515e-13	-0.480047	0.035	0.274	1.99395e-09	45
XBP1	1.46745e-13	0.638284	0.745	0.741	2.09727e-09	45
STT3B	1.61922e-13	-0.265556	0.152	0.444	2.31419e-09	45
MYL6	1.7629e-13	-0.38424	0.935	0.985	2.51954e-09	45
PSMA4	1.81011e-13	-0.329659	0.571	0.844	2.58701e-09	45
MARCKS	2.26097e-13	-0.409849	0.494	0.805	3.23138e-09	45
MRPL20	2.2774e-13	-0.295108	0.416	0.751	3.25486e-09	45
ENSSSCG00000000951	2.33155e-13	-0.655872	0.1	0.357	3.33225e-09	45
LGR4	2.38923e-13	-0.328046	0.247	0.544	3.41469e-09	45
NDUFA8	2.43256e-13	-0.301592	0.411	0.707	3.47662e-09	45
SELENOH	2.43354e-13	-0.292819	0.247	0.56	3.47801e-09	45
TAF1D	2.45345e-13	-0.307198	0.346	0.674	3.50646e-09	45
DBNDD2	2.63497e-13	0.705099	0.485	0.288	3.7659e-09	45
CER1	2.63722e-13	0.266493	0.134	0.008	3.76911e-09	45
CAPRIN1	2.84538e-13	-0.28896	0.303	0.633	4.06662e-09	45
TSPAN13	3.09757e-13	0.583255	0.576	0.405	4.42704e-09	45
PPIB	3.23059e-13	-0.363606	0.68	0.932	4.61716e-09	45
IGFBP7	3.4249e-13	-1.82641	0.004	0.207	4.89487e-09	45
RANBP1	3.81174e-13	-0.379187	0.351	0.664	5.44773e-09	45
CTNNBIP1	3.83258e-13	0.422639	0.338	0.133	5.47752e-09	45
ENSSSCG00000032591	3.901e-13	-0.712694	0.087	0.34	5.57531e-09	45
NDUFAF3	3.92818e-13	-0.291161	0.294	0.61	5.61415e-09	45
CASC4	3.99901e-13	0.560592	0.429	0.23	5.71539e-09	45
NPM3	4.23445e-13	-0.374175	0.121	0.388	6.05187e-09	45
CNIH4	4.37214e-13	-0.259335	0.126	0.411	6.24866e-09	45
DNAJC10	4.94255e-13	0.491198	0.489	0.278	7.0639e-09	45
PSEN1	5.08122e-13	-0.263413	0.134	0.417	7.26208e-09	45
NFIB	5.24436e-13	-0.391141	0.1	0.359	7.49524e-09	45
GNG11	5.80455e-13	-1.94264	0.009	0.212	8.29586e-09	45
AP1S1	6.19482e-13	-0.268454	0.372	0.683	8.85364e-09	45
GPX2	6.26093e-13	-1.09383	0.286	0.515	8.94812e-09	45
TXN2	6.34361e-13	-0.269586	0.411	0.716	9.06629e-09	45
CFL1	6.56524e-13	0.345146	0.974	0.988	9.38305e-09	45
CYBRD1	7.07062e-13	-0.325336	0.048	0.284	1.01053e-08	45
ENSSSCG00000012886	7.4405e-13	0.49901	0.481	0.276	1.0634e-08	45
CCT4	7.5056e-13	-0.312782	0.377	0.703	1.0727e-08	45
GPX1	7.78477e-13	-0.607249	0.416	0.714	1.1126e-08	45
AIMP1	8.35904e-13	-0.267388	0.506	0.813	1.19467e-08	45
ID1	8.73995e-13	0.97253	0.563	0.405	1.24911e-08	45
BOLA3	8.75832e-13	-0.293102	0.299	0.61	1.25174e-08	45
SLC7A9	9.2481e-13	-0.361989	0.082	0.342	1.32174e-08	45
PLAAT3	9.93445e-13	0.799782	0.593	0.461	1.41983e-08	45
VILL	1.01135e-12	0.275451	0.165	0.023	1.44542e-08	45
ENSSSCG00000035706	1.03677e-12	-0.283575	0.121	0.39	1.48176e-08	45
SSRP1	1.0495e-12	-0.282734	0.169	0.454	1.49994e-08	45
FUOM	1.11592e-12	0.698778	0.485	0.29	1.59487e-08	45
ITGB1	1.18856e-12	-0.430112	0.455	0.749	1.6987e-08	45
TCP1	1.20924e-12	-0.299346	0.238	0.539	1.72825e-08	45
PEPD	1.27529e-12	-0.440616	0.216	0.508	1.82265e-08	45
ENSSSCG00000014296	1.33214e-12	-0.293746	0.476	0.786	1.90389e-08	45
NDUFB2	1.38198e-12	-0.302224	0.667	0.896	1.97512e-08	45
ENSSSCG00000037071	1.4064e-12	-0.304589	0.481	0.761	2.01003e-08	45
TMEM54	1.42802e-12	0.654269	0.753	0.699	2.04093e-08	45
CNBP	1.42953e-12	-0.364577	0.528	0.805	2.04308e-08	45
TXNIP	1.44662e-12	0.74421	0.775	0.838	2.06751e-08	45
TMEM236	1.45749e-12	-0.250287	0.139	0.423	2.08304e-08	45
NDUFS4	1.53141e-12	-0.316612	0.597	0.838	2.18869e-08	45
ESD	1.63782e-12	-0.288831	0.511	0.786	2.34078e-08	45
KDELR2	1.71622e-12	0.619146	0.658	0.635	2.45282e-08	45
ATP2B1	1.71807e-12	-0.305198	0.342	0.664	2.45547e-08	45
ACTG1	1.75105e-12	0.433725	0.996	0.975	2.5026e-08	45
FBL	1.7602e-12	-0.258365	0.113	0.373	2.51568e-08	45
SLC17A9	1.80025e-12	0.26069	0.229	0.058	2.57292e-08	45
ENSSSCG00000006830	1.81535e-12	-0.325021	0.524	0.77	2.59449e-08	45
CALD1	1.96641e-12	-1.48157	0.004	0.197	2.8104e-08	45
ENSSSCG00000008974	2.07817e-12	-0.255179	0.143	0.423	2.97013e-08	45
SS18L2	2.13788e-12	-0.318517	0.437	0.743	3.05545e-08	45
SLC50A1	2.27352e-12	0.585066	0.433	0.247	3.24931e-08	45
ENSSSCG00000020808	2.54208e-12	-0.307613	0.264	0.571	3.63314e-08	45
ARID5B	2.62503e-12	-0.317338	0.091	0.344	3.75169e-08	45
MRPL22	3.02582e-12	-0.25072	0.221	0.531	4.3245e-08	45
TLDC2	3.05049e-12	-0.318425	0.087	0.338	4.35977e-08	45
NME2	3.17189e-12	-0.377514	0.779	0.936	4.53327e-08	45
SERPING1	3.21298e-12	-1.1671	0.004	0.193	4.59199e-08	45
ENSSSCG00000001724	3.26611e-12	-0.50677	0.013	0.214	4.66793e-08	45
ENSSSCG00000039618	3.88583e-12	-0.257644	0.139	0.396	5.55363e-08	45
TRIB1	4.37815e-12	0.573981	0.779	0.68	6.25725e-08	45
DNPEP	4.53971e-12	-0.260535	0.082	0.328	6.48816e-08	45
MRPL27	4.58027e-12	-0.269523	0.247	0.558	6.54612e-08	45
TPPP3	4.61215e-12	0.447454	0.351	0.135	6.59168e-08	45
EEF2	4.64316e-12	-0.263959	0.892	0.977	6.636e-08	45
SLCO2A1	4.74287e-12	0.279374	0.182	0.031	6.7785e-08	45
EIF3A	5.26418e-12	-0.338268	0.424	0.726	7.52356e-08	45
PIBF1	5.7198e-12	-0.375465	0.087	0.317	8.17474e-08	45
ANPEP	5.79504e-12	-1.17554	0.307	0.533	8.28227e-08	45
ENSSSCG00000033190	6.02761e-12	-0.565968	0.035	0.243	8.61466e-08	45
LSM6	6.6692e-12	-0.311813	0.333	0.622	9.53163e-08	45
UAP1	6.67161e-12	0.581475	0.541	0.38	9.53507e-08	45
TIMM13	6.68433e-12	-0.252832	0.247	0.552	9.55324e-08	45
HIKESHI	6.9258e-12	-0.266876	0.364	0.687	9.89835e-08	45
C1S	7.09673e-12	-1.14773	0.004	0.189	1.01426e-07	45
AKAP9	7.98137e-12	0.558014	0.706	0.664	1.1407e-07	45
APOBEC1	8.13034e-12	-0.270969	0.043	0.266	1.16199e-07	45
FABP2	8.16653e-12	-1.22816	0.268	0.515	1.16716e-07	45
TMEM61	8.29138e-12	0.450847	0.325	0.129	1.185e-07	45
GRTP1	8.77429e-12	-0.339013	0.303	0.591	1.25402e-07	45
ENSSSCG00000038406	9.01951e-12	0.666004	0.671	0.573	1.28907e-07	45
NOXO1	9.07876e-12	0.422513	0.203	0.048	1.29754e-07	45
MAP1LC3A	9.49558e-12	0.526484	0.61	0.429	1.35711e-07	45
CEBPB	1.00197e-11	0.662539	0.68	0.602	1.43202e-07	45
IL18	1.05319e-11	-0.309785	0.069	0.297	1.50522e-07	45
HACD2	1.06054e-11	-0.268139	0.182	0.467	1.51572e-07	45
DDC	1.09685e-11	0.791729	0.29	0.108	1.56762e-07	45
ATP5ME	1.1076e-11	-0.296281	0.74	0.921	1.58298e-07	45
ENSSSCG00000001341	1.21239e-11	0.522625	0.957	0.985	1.73275e-07	45
ENSSSCG00000000273	1.22587e-11	0.612224	0.948	0.921	1.75201e-07	45
TMF1	1.32739e-11	0.474142	0.398	0.203	1.8971e-07	45
MGST2	1.42613e-11	-0.411991	0.524	0.755	2.03822e-07	45
NUDT22	1.4423e-11	0.418001	0.364	0.17	2.06134e-07	45
NIFK	1.56172e-11	-0.310626	0.329	0.622	2.23201e-07	45
ENTPD6	1.60057e-11	0.550636	0.45	0.268	2.28753e-07	45
MTDH	1.64822e-11	-0.26294	0.455	0.757	2.35564e-07	45
SAMD9	1.78932e-11	0.69192	0.628	0.506	2.5573e-07	45
VPS36	1.80523e-11	-0.268918	0.333	0.656	2.58004e-07	45
RRBP1	1.83261e-11	0.65872	0.714	0.71	2.61916e-07	45
ERRFI1	1.91712e-11	0.662693	0.623	0.459	2.73994e-07	45
ERICH4	2.03346e-11	-0.308954	0.039	0.247	2.90622e-07	45
SLC10A2	2.04698e-11	-0.472405	0.022	0.216	2.92554e-07	45
P3H1	2.05858e-11	0.549471	0.446	0.255	2.94212e-07	45
ENSSSCG00000013232	2.11121e-11	-0.274382	0.489	0.751	3.01734e-07	45
MTTP	2.33204e-11	-0.268986	0.013	0.199	3.33296e-07	45
ENSSSCG00000030478	2.34949e-11	-0.258244	0.329	0.624	3.35789e-07	45
PNRC2	2.43872e-11	-0.291099	0.403	0.716	3.48541e-07	45
CDC26	2.48174e-11	-0.290744	0.532	0.84	3.54691e-07	45
REEP5	2.5684e-11	0.452309	0.519	0.33	3.67076e-07	45
ENSSSCG00000000377	2.80977e-11	-0.292209	0.29	0.566	4.01572e-07	45
CCT7	2.90083e-11	-0.29419	0.368	0.67	4.14587e-07	45
SHROOM3	3.05465e-11	0.480779	0.325	0.145	4.3657e-07	45
COL18A1	3.09006e-11	-0.824778	0	0.17	4.41632e-07	45
ENSSSCG00000001229	3.27233e-11	0.431927	1	1	4.67682e-07	45
ID3	3.48461e-11	0.576503	0.628	0.467	4.9802e-07	45
DUT	3.73625e-11	-0.385132	0.238	0.508	5.33985e-07	45
ENSSSCG00000011723	3.90084e-11	-0.316686	0.022	0.214	5.57507e-07	45
SMIM31	4.05804e-11	0.555929	0.394	0.214	5.79975e-07	45
GSDMB	4.0975e-11	-0.285188	0.403	0.687	5.85614e-07	45
ENSSSCG00000039582	4.11091e-11	-0.268061	0.745	0.913	5.87531e-07	45
ISG12(A)	4.18788e-11	0.478575	0.957	0.99	5.98531e-07	45
PLAUR	4.20182e-11	-0.342164	0	0.168	6.00524e-07	45
RBPJ	4.40357e-11	-0.277827	0.121	0.376	6.29359e-07	45
DCBLD1	4.44468e-11	0.398444	0.307	0.122	6.35234e-07	45
NCL	4.46587e-11	-0.295696	0.286	0.581	6.38261e-07	45
TRIM40	4.86282e-11	0.622179	0.424	0.243	6.94994e-07	45
SLC22A23	4.98868e-11	0.417706	0.294	0.116	7.12982e-07	45
C4A	5.06738e-11	-0.390069	0.199	0.473	7.2423e-07	45
ING2	5.17613e-11	-0.25783	0.143	0.4	7.39772e-07	45
CSTB	5.66564e-11	-0.332833	0.745	0.952	8.09733e-07	45
PDHB	5.96901e-11	-0.252406	0.338	0.645	8.53091e-07	45
DNAJA1	6.01825e-11	-0.353834	0.636	0.905	8.60129e-07	45
ENSSSCG00000024313	6.4597e-11	-0.325334	0.39	0.67	9.23221e-07	45
ZFP36L2	6.53548e-11	-0.262252	0.524	0.811	9.34051e-07	45
PIP5K1B	6.68907e-11	0.280907	0.294	0.112	9.56002e-07	45
FILIP1L	7.18616e-11	-0.349272	0.095	0.326	1.02705e-06	45
CAV1	7.75124e-11	-1.17451	0	0.164	1.10781e-06	45
NDUFA6	7.96923e-11	-0.262875	0.403	0.687	1.13896e-06	45
SSB	9.27165e-11	-0.274317	0.537	0.826	1.3251e-06	45
MGST3	9.75953e-11	-0.279319	0.805	0.917	1.39483e-06	45
S100A1	1.05948e-10	0.539496	0.212	0.058	1.51421e-06	45
SLC1A1	1.10049e-10	-0.290894	0.061	0.272	1.57282e-06	45
[truncated: 1,972 more rows]

## Sheet: GO_results
cluster	GO.ID	Term	Annotated	Significant	Expected	pval
36	GO:0072348	sulfur compound transport	30	8	1.56	0.00011
36	GO:0006855	drug transmembrane transport	47	10	2.44	0.00012
36	GO:0042104	positive regulation of activated T cell proliferation	12	5	0.62	0.00022
36	GO:0006414	translational elongation	33	8	1.71	0.00022
36	GO:0002181	cytoplasmic translation	42	9	2.18	0.00024
36	GO:0072337	modified amino acid transport	19	6	0.99	0.00029
36	GO:0018904	ether metabolic process	14	5	0.73	0.0005
36	GO:0046034	ATP metabolic process	154	45	7.99	0.00054
36	GO:0016999	antibiotic metabolic process	37	10	1.92	0.00068
36	GO:0032787	monocarboxylic acid metabolic process	283	34	14.69	0.00068
36	GO:0019430	removal of superoxide radicals	15	5	0.78	0.00072
36	GO:0061744	motor behavior	9	4	0.47	0.00073
36	GO:0032782	bile acid secretion	5	3	0.26	0.00129
36	GO:0006108	malate metabolic process	5	3	0.26	0.00129
36	GO:0042364	water-soluble vitamin biosynthetic process	5	3	0.26	0.00129
36	GO:0045823	positive regulation of heart contraction	17	5	0.88	0.00136
36	GO:0046683	response to organophosphorus	44	8	2.28	0.00169
36	GO:0098656	anion transmembrane transport	99	13	5.14	0.00175
36	GO:0030033	microvillus assembly	11	4	0.57	0.00177
36	GO:0000387	spliceosomal snRNP assembly	27	6	1.4	0.00221
36	GO:0045454	cell redox homeostasis	19	5	0.99	0.00234
36	GO:0034372	very-low-density lipoprotein particle remodeling	6	3	0.31	0.00247
36	GO:0006122	mitochondrial electron transport, ubiquinol to cytochrome c	6	3	0.31	0.00247
36	GO:0042045	epithelial fluid transport	6	3	0.31	0.00247
36	GO:0009176	pyrimidine deoxyribonucleoside monophosphate metabolic process	6	3	0.31	0.00247
36	GO:0034377	plasma lipoprotein particle assembly	13	4	0.67	0.00352
36	GO:0042596	fear response	21	5	1.09	0.00376
36	GO:0140115	export across plasma membrane	21	5	1.09	0.00376
36	GO:0042744	hydrogen peroxide catabolic process	7	3	0.36	0.00416
36	GO:0015721	bile acid and bile salt transport	7	3	0.36	0.00416
36	GO:0030449	regulation of complement activation	7	3	0.36	0.00416
36	GO:0045989	positive regulation of striated muscle contraction	7	3	0.36	0.00416
36	GO:0042273	ribosomal large subunit biogenesis	31	6	1.61	0.00461
36	GO:0042274	ribosomal small subunit biogenesis	22	5	1.14	0.00466
36	GO:0006805	xenobiotic metabolic process	22	5	1.14	0.00466
36	GO:0009065	glutamine family amino acid catabolic process	14	4	0.73	0.00473
36	GO:0055078	sodium ion homeostasis	14	4	0.73	0.00473
36	GO:1990542	mitochondrial transmembrane transport	51	13	2.65	0.0051
36	GO:0009150	purine ribonucleotide metabolic process	199	34	10.33	0.00515
36	GO:0006635	fatty acid beta-oxidation	40	9	2.08	0.0053
36	GO:0043171	peptide catabolic process	15	4	0.78	0.00619
36	GO:0045109	intermediate filament organization	15	4	0.78	0.00619
36	GO:0007588	excretion	15	4	0.78	0.00619
36	GO:0006000	fructose metabolic process	8	3	0.42	0.0064
36	GO:0033539	fatty acid beta-oxidation using acyl-CoA dehydrogenase	8	3	0.42	0.0064
36	GO:0015701	bicarbonate transport	8	3	0.42	0.0064
36	GO:0015867	ATP transport	8	3	0.42	0.0064
36	GO:0042026	protein refolding	8	3	0.42	0.0064
36	GO:0019370	leukotriene biosynthetic process	8	3	0.42	0.0064
36	GO:0048240	sperm capacitation	8	3	0.42	0.0064
36	GO:0019400	alditol metabolic process	8	3	0.42	0.0064
36	GO:0009219	pyrimidine deoxyribonucleotide metabolic process	8	3	0.42	0.0064
36	GO:0043280	positive regulation of cysteine-type endopeptidase activity involved in apoptotic process	66	9	3.43	0.00673
36	GO:0006221	pyrimidine nucleotide biosynthetic process	16	4	0.83	0.00792
36	GO:0051881	regulation of mitochondrial membrane potential	45	7	2.34	0.00795
36	GO:0014074	response to purine-containing compound	45	7	2.34	0.00795
36	GO:0015804	neutral amino acid transport	25	5	1.3	0.00827
36	GO:0006637	acyl-CoA metabolic process	35	6	1.82	0.00853
36	GO:0001819	positive regulation of cytokine production	276	24	14.33	0.00909
36	GO:0046051	UTP metabolic process	9	3	0.47	0.00923
36	GO:0060088	auditory receptor cell stereocilium organization	9	3	0.47	0.00923
36	GO:0006750	glutathione biosynthetic process	9	3	0.47	0.00923
36	GO:0006165	nucleoside diphosphate phosphorylation	70	9	3.63	0.00986
36	GO:0052548	regulation of endopeptidase activity	163	20	8.46	0.01074
36	GO:1901568	fatty acid derivative metabolic process	56	10	2.91	0.011
36	GO:0051591	response to cAMP	27	5	1.4	0.01154
36	GO:1990748	cellular detoxification	33	9	1.71	0.01194
36	GO:0046039	GTP metabolic process	18	4	0.93	0.01227
36	GO:0070328	triglyceride homeostasis	18	4	0.93	0.01227
36	GO:0055090	acylglycerol homeostasis	18	4	0.93	0.01227
36	GO:0098869	cellular oxidant detoxification	25	8	1.3	0.01241
36	GO:0046364	monosaccharide biosynthetic process	49	7	2.54	0.0126
36	GO:0072530	purine-containing compound transmembrane transport	10	3	0.52	0.01269
36	GO:0032530	regulation of microvillus organization	10	3	0.52	0.01269
36	GO:0006833	water transport	10	3	0.52	0.01269
36	GO:0006662	glycerol ether metabolic process	10	3	0.52	0.01269
36	GO:0030004	cellular monovalent inorganic cation homeostasis	39	6	2.02	0.01439
36	GO:0052547	regulation of peptidase activity	181	21	9.39	0.01482
36	GO:0006066	alcohol metabolic process	164	18	8.51	0.01486
36	GO:1903599	positive regulation of autophagy of mitochondrion	19	4	0.99	0.01492
36	GO:0001662	behavioral fear response	19	4	0.99	0.01492
36	GO:0007200	phospholipase C-activating G protein-coupled receptor signaling pathway	19	4	0.99	0.01492
36	GO:0015718	monocarboxylic acid transport	72	12	3.74	0.01508
36	GO:0045840	positive regulation of mitotic nuclear division	29	5	1.51	0.0156
36	GO:0002437	inflammatory response to antigenic stimulus	29	5	1.51	0.0156
36	GO:1903146	regulation of autophagy of mitochondrion	29	5	1.51	0.0156
36	GO:1901615	organic hydroxy compound metabolic process	239	23	12.4	0.01628
36	GO:0009205	purine ribonucleoside triphosphate metabolic process	52	18	2.7	0.0164
36	GO:0032740	positive regulation of interleukin-17 production	11	3	0.57	0.01678
36	GO:0150104	transport across blood-brain barrier	11	3	0.57	0.01678
36	GO:0006857	oligopeptide transport	11	3	0.57	0.01678
36	GO:0010460	positive regulation of heart rate	11	3	0.57	0.01678
36	GO:0098760	response to interleukin-7	11	3	0.57	0.01678
36	GO:0098761	cellular response to interleukin-7	11	3	0.57	0.01678
36	GO:0010232	vascular transport	11	3	0.57	0.01678
36	GO:0042474	middle ear morphogenesis	11	3	0.57	0.01678
36	GO:0002209	behavioral defense response	20	4	1.04	0.0179
36	GO:0051181	cofactor transport	30	5	1.56	0.01794
36	GO:0006919	activation of cysteine-type endopeptidase activity involved in apoptotic process	41	6	2.13	0.01819
36	GO:0015893	drug transport	94	17	4.88	0.01894
36	GO:2001244	positive regulation of intrinsic apoptotic signaling pathway	42	6	2.18	0.02032
36	GO:0015807	L-amino acid transport	31	5	1.61	0.02051
36	GO:0098754	detoxification	36	9	1.87	0.02067
36	GO:0042632	cholesterol homeostasis	54	7	2.8	0.02082
36	GO:0006641	triglyceride metabolic process	54	7	2.8	0.02082
36	GO:0039528	cytoplasmic pattern recognition receptor signaling pathway in response to virus	21	4	1.09	0.02123
36	GO:0000423	mitophagy	21	4	1.09	0.02123
36	GO:0045056	transcytosis	12	3	0.62	0.02153
36	GO:0006085	acetyl-CoA biosynthetic process	12	3	0.62	0.02153
36	GO:0071616	acyl-CoA biosynthetic process	12	3	0.62	0.02153
36	GO:0035384	thioester biosynthetic process	12	3	0.62	0.02153
36	GO:0051085	chaperone cofactor-dependent protein refolding	12	3	0.62	0.02153
36	GO:0140448	signaling receptor ligand precursor processing	12	3	0.62	0.02153
36	GO:1901798	positive regulation of signal transduction by p53 class mediator	12	3	0.62	0.02153
36	GO:0023035	CD40 signaling pathway	12	3	0.62	0.02153
36	GO:1901526	positive regulation of mitophagy	12	3	0.62	0.02153
36	GO:1902652	secondary alcohol metabolic process	67	8	3.48	0.02204
36	GO:0010951	negative regulation of endopeptidase activity	67	8	3.48	0.02204
36	GO:0034101	erythrocyte homeostasis	93	10	4.83	0.02204
36	GO:0006364	rRNA processing	80	9	4.15	0.02233
36	GO:0000422	autophagy of mitochondrion	43	6	2.23	0.02261
36	GO:0061726	mitochondrion disassembly	43	6	2.23	0.02261
36	GO:0055092	sterol homeostasis	55	7	2.85	0.02283
36	GO:0055117	regulation of cardiac muscle contraction	32	5	1.66	0.0233
36	GO:0034764	positive regulation of transmembrane transport	94	10	4.88	0.02356
36	GO:0006090	pyruvate metabolic process	68	8	3.53	0.02388
36	GO:0060081	membrane hyperpolarization	5	2	0.26	0.02422
36	GO:0032534	regulation of microvillus assembly	5	2	0.26	0.02422
36	GO:0046385	deoxyribose phosphate biosynthetic process	5	2	0.26	0.02422
36	GO:1902031	regulation of NADP metabolic process	5	2	0.26	0.02422
36	GO:0060452	positive regulation of cardiac muscle contraction	5	2	0.26	0.02422
36	GO:2001225	regulation of chloride transport	5	2	0.26	0.02422
36	GO:0042940	D-amino acid transport	5	2	0.26	0.02422
36	GO:0045852	pH elevation	5	2	0.26	0.02422
36	GO:0042939	tripeptide transport	5	2	0.26	0.02422
36	GO:1904970	brush border assembly	5	2	0.26	0.02422
36	GO:0015866	ADP transport	5	2	0.26	0.02422
36	GO:0090461	glutamate homeostasis	5	2	0.26	0.02422
36	GO:0034635	glutathione transport	5	2	0.26	0.02422
36	GO:0032075	positive regulation of nuclease activity	5	2	0.26	0.02422
36	GO:0071499	cellular response to laminar fluid shear stress	5	2	0.26	0.02422
36	GO:0006883	cellular sodium ion homeostasis	5	2	0.26	0.02422
36	GO:0070269	pyroptosis	5	2	0.26	0.02422
36	GO:0051454	intracellular pH elevation	5	2	0.26	0.02422
36	GO:0006591	ornithine metabolic process	5	2	0.26	0.02422
36	GO:0035633	maintenance of blood-brain barrier	5	2	0.26	0.02422
36	GO:0071280	cellular response to copper ion	5	2	0.26	0.02422
36	GO:0009265	2'-deoxyribonucleotide biosynthetic process	5	2	0.26	0.02422
36	GO:0071320	cellular response to cAMP	22	4	1.14	0.02491
36	GO:0050892	intestinal absorption	22	4	1.14	0.02491
36	GO:0055088	lipid homeostasis	82	9	4.26	0.02578
36	GO:0072525	pyridine-containing compound biosynthetic process	13	3	0.67	0.02693
36	GO:0006458	'de novo' protein folding	13	3	0.67	0.02693
36	GO:0051084	'de novo' posttranslational protein folding	13	3	0.67	0.02693
36	GO:0009144	purine nucleoside triphosphate metabolic process	56	18	2.91	0.02716
36	GO:0007006	mitochondrial membrane organization	57	7	2.96	0.02723
36	GO:0048872	homeostasis of number of cells	197	17	10.22	0.02727
36	GO:0019319	hexose biosynthetic process	45	6	2.34	0.02771
36	GO:0071407	cellular response to organic cyclic compound	259	21	13.44	0.02831
36	GO:0002262	myeloid cell homeostasis	111	11	5.76	0.02892
36	GO:0002753	cytoplasmic pattern recognition receptor signaling pathway	34	5	1.76	0.02959
36	GO:0055081	anion homeostasis	34	5	1.76	0.02959
36	GO:0046031	ADP metabolic process	58	7	3.01	0.02964
36	GO:0008643	carbohydrate transport	71	8	3.69	0.03007
36	GO:0006885	regulation of pH	46	6	2.39	0.03052
36	GO:0044283	small molecule biosynthetic process	325	30	16.87	0.03124
36	GO:0034250	positive regulation of cellular amide metabolic process	85	9	4.41	0.03165
36	GO:0000027	ribosomal large subunit assembly	14	3	0.73	0.03298
36	GO:0032069	regulation of nuclease activity	14	3	0.73	0.03298
36	GO:0002385	mucosal immune response	14	3	0.73	0.03298
36	GO:0051926	negative regulation of calcium ion transport	24	4	1.25	0.03336
36	GO:0090207	regulation of triglyceride metabolic process	24	4	1.25	0.03336
36	GO:0030218	erythrocyte differentiation	86	9	4.46	0.03379
36	GO:0007005	mitochondrion organization	291	46	15.1	0.03484
36	GO:0006071	glycerol metabolic process	6	2	0.31	0.03509
36	GO:0006072	glycerol-3-phosphate metabolic process	6	2	0.31	0.03509
36	GO:0034379	very-low-density lipoprotein particle assembly	6	2	0.31	0.03509
36	GO:0039533	regulation of MDA-5 signaling pathway	6	2	0.31	0.03509
36	GO:0002524	hypersensitivity	6	2	0.31	0.03509
36	GO:0033750	ribosome localization	6	2	0.31	0.03509
36	GO:0010988	regulation of low-density lipoprotein particle clearance	6	2	0.31	0.03509
36	GO:0090084	negative regulation of inclusion body assembly	6	2	0.31	0.03509
36	GO:0000052	citrulline metabolic process	6	2	0.31	0.03509
36	GO:0000054	ribosomal subunit export from nucleus	6	2	0.31	0.03509
36	GO:0000055	ribosomal large subunit export from nucleus	6	2	0.31	0.03509
36	GO:1903961	positive regulation of anion transmembrane transport	6	2	0.31	0.03509
36	GO:0015791	polyol transport	6	2	0.31	0.03509
36	GO:0015824	proline transport	6	2	0.31	0.03509
36	GO:0080144	amino acid homeostasis	6	2	0.31	0.03509
36	GO:0032071	regulation of endodeoxyribonuclease activity	6	2	0.31	0.03509
36	GO:0071428	rRNA-containing ribonucleoprotein complex export from nucleus	6	2	0.31	0.03509
36	GO:0000101	sulfur amino acid transport	6	2	0.31	0.03509
36	GO:0016553	base conversion or substitution editing	6	2	0.31	0.03509
36	GO:0009223	pyrimidine deoxyribonucleotide catabolic process	6	2	0.31	0.03509
36	GO:0045333	cellular respiration	90	41	4.67	0.03519
36	GO:0006690	icosanoid metabolic process	44	8	2.28	0.0362
36	GO:0002221	pattern recognition receptor signaling pathway	115	11	5.97	0.03621
36	GO:0051785	positive regulation of nuclear division	36	5	1.87	0.03686
36	GO:0010466	negative regulation of peptidase activity	74	8	3.84	0.03728
36	GO:0015698	inorganic anion transport	61	7	3.17	0.03771
36	GO:0008217	regulation of blood pressure	61	7	3.17	0.03771
36	GO:0032731	positive regulation of interleukin-1 beta production	25	4	1.3	0.03814
36	GO:0097035	regulation of membrane lipid distribution	25	4	1.3	0.03814
36	GO:0051882	mitochondrial depolarization	15	3	0.78	0.03968
36	GO:0006595	polyamine metabolic process	15	3	0.78	0.03968
36	GO:0072655	establishment of protein localization to mitochondrion	49	6	2.54	0.04005
36	GO:0009179	purine ribonucleoside diphosphate metabolic process	62	7	3.22	0.04069
36	GO:0016072	rRNA metabolic process	89	9	4.62	0.04082
36	GO:0006821	chloride transport	37	5	1.92	0.04087
36	GO:0043279	response to alkaloid	26	4	1.35	0.04329
36	GO:1901068	guanosine-containing compound metabolic process	26	4	1.35	0.04329
36	GO:0050766	positive regulation of phagocytosis	26	4	1.35	0.04329
36	GO:0070585	protein localization to mitochondrion	50	6	2.6	0.0436
36	GO:0035821	modulation of process of other organism	63	7	3.27	0.04382
36	GO:0009185	ribonucleoside diphosphate metabolic process	63	7	3.27	0.04382
36	GO:0009135	purine nucleoside diphosphate metabolic process	63	7	3.27	0.04382
36	GO:0051188	cofactor biosynthetic process	114	13	5.92	0.04442
36	GO:2001242	regulation of intrinsic apoptotic signaling pathway	119	11	6.18	0.0447
36	GO:0033559	unsaturated fatty acid metabolic process	38	5	1.97	0.04514
36	GO:0002027	regulation of heart rate	38	5	1.97	0.04514
36	GO:0002251	organ or tissue specific immune response	16	3	0.83	0.04701
36	GO:0097345	mitochondrial outer membrane permeabilization	16	3	0.83	0.04701
36	GO:0071312	cellular response to alkaloid	16	3	0.83	0.04701
36	GO:0009124	nucleoside monophosphate biosynthetic process	16	3	0.83	0.04701
36	GO:1903170	negative regulation of calcium ion transmembrane transport	16	3	0.83	0.04701
36	GO:1901524	regulation of mitophagy	16	3	0.83	0.04701
36	GO:1903825	organic acid transmembrane transport	64	7	3.32	0.0471
36	GO:1905039	carboxylic acid transmembrane transport	64	7	3.32	0.0471
36	GO:0006086	acetyl-CoA biosynthetic process from pyruvate	7	2	0.36	0.04746
36	GO:0021554	optic nerve development	7	2	0.36	0.04746
36	GO:0039530	MDA-5 signaling pathway	7	2	0.36	0.04746
36	GO:0043278	response to morphine	7	2	0.36	0.04746
36	GO:0007096	regulation of exit from mitosis	7	2	0.36	0.04746
36	GO:1904590	negative regulation of protein import	7	2	0.36	0.04746
36	GO:1904667	negative regulation of ubiquitin protein ligase activity	7	2	0.36	0.04746
36	GO:0001975	response to amphetamine	7	2	0.36	0.04746
36	GO:0018065	protein-cofactor linkage	7	2	0.36	0.04746
36	GO:0006183	GTP biosynthetic process	7	2	0.36	0.04746
36	GO:0006228	UTP biosynthetic process	7	2	0.36	0.04746
36	GO:0070293	renal absorption	7	2	0.36	0.04746
36	GO:1902231	positive regulation of intrinsic apoptotic signaling pathway in response to DNA damage	7	2	0.36	0.04746
36	GO:0042308	negative regulation of protein import into nucleus	7	2	0.36	0.04746
36	GO:0014072	response to isoquinoline alkaloid	7	2	0.36	0.04746
36	GO:0014075	response to amine	7	2	0.36	0.04746
36	GO:0032732	positive regulation of interleukin-1 production	27	4	1.4	0.04881
36	GO:0034122	negative regulation of toll-like receptor signaling pathway	27	4	1.4	0.04881
36	GO:0043090	amino acid import	27	4	1.4	0.04881
36	GO:0009152	purine ribonucleotide biosynthetic process	88	20	4.57	0.04895
45	GO:0090303	positive regulation of wound healing	38	6	0.88	0.00021
45	GO:0050878	regulation of body fluid levels	154	12	3.55	0.00023
45	GO:1990440	positive regulation of transcription from RNA polymerase II promoter in response to endoplasmic reticulum stress	7	3	0.16	0.0004
45	GO:0042742	defense response to bacterium	102	9	2.35	0.00056
45	GO:0043433	negative regulation of DNA-binding transcription factor activity	102	9	2.35	0.00056
45	GO:0002067	glandular epithelial cell differentiation	32	5	0.74	0.00076
45	GO:0032228	regulation of synaptic transmission, GABAergic	10	3	0.23	0.00129
45	GO:0009084	glutamine family amino acid biosynthetic process	10	3	0.23	0.00129
45	GO:0009267	cellular response to starvation	95	8	2.19	0.00154
45	GO:1903532	positive regulation of secretion by cell	122	9	2.81	0.00201
45	GO:0030595	leukocyte chemotaxis	123	9	2.84	0.00213
45	GO:0048193	Golgi vesicle transport	151	10	3.48	0.00257
45	GO:0045744	negative regulation of G protein-coupled receptor signaling pathway	26	4	0.6	0.00276
45	GO:0051402	neuron apoptotic process	105	8	2.42	0.0029
45	GO:0023019	signal transduction involved in regulation of gene expression	13	3	0.3	0.00292
45	GO:0050927	positive regulation of positive chemotaxis	13	3	0.3	0.00292
45	GO:0009617	response to bacterium	277	22	6.39	0.00293
45	GO:0046434	organophosphate catabolic process	83	7	1.91	0.00297
45	GO:0023061	signal release	208	12	4.8	0.00316
45	GO:0032732	positive regulation of interleukin-1 production	27	4	0.62	0.00319
45	GO:0032496	response to lipopolysaccharide	132	9	3.04	0.00343
45	GO:0050673	epithelial cell proliferation	239	13	5.51	0.00359
45	GO:0007176	regulation of epidermal growth factor-activated receptor activity	14	3	0.32	0.00365
45	GO:0043951	negative regulation of cAMP-mediated signaling	14	3	0.32	0.00365
45	GO:0007188	adenylate cyclase-modulating G protein-coupled receptor signaling pathway	66	6	1.52	0.00404
45	GO:0006621	protein retention in ER lumen	5	2	0.12	0.00506
45	GO:0044341	sodium-dependent phosphate transport	5	2	0.12	0.00506
45	GO:0046133	pyrimidine ribonucleoside catabolic process	5	2	0.12	0.00506
45	GO:1905050	positive regulation of metallopeptidase activity	5	2	0.12	0.00506
45	GO:0015889	cobalamin transport	5	2	0.12	0.00506
45	GO:0010966	regulation of phosphate transport	5	2	0.12	0.00506
45	GO:0043086	negative regulation of catalytic activity	340	16	7.84	0.0054
45	GO:0030334	regulation of cell migration	530	22	12.22	0.00542
45	GO:0048168	regulation of neuronal synaptic plasticity	16	3	0.37	0.00543
45	GO:0042127	regulation of cell population proliferation	874	32	20.15	0.00583
45	GO:0043299	leukocyte degranulation	32	4	0.74	0.00597
45	GO:0009306	protein secretion	146	9	3.37	0.00663
45	GO:0007586	digestion	52	5	1.2	0.00672
45	GO:0010817	regulation of hormone levels	231	12	5.33	0.00724
45	GO:0003071	renal system process involved in regulation of systemic arterial blood pressure	6	2	0.14	0.00747
45	GO:1903753	negative regulation of p38MAPK cascade	6	2	0.14	0.00747
45	GO:2000341	regulation of chemokine (C-X-C motif) ligand 2 production	6	2	0.14	0.00747
45	GO:0061140	lung secretory cell differentiation	6	2	0.14	0.00747
45	GO:0072677	eosinophil migration	6	2	0.14	0.00747
45	GO:0042593	glucose homeostasis	123	8	2.84	0.00752
45	GO:0045766	positive regulation of angiogenesis	99	7	2.28	0.00783
45	GO:0140056	organelle localization by membrane tethering	35	4	0.81	0.00823
45	GO:1902107	positive regulation of leukocyte differentiation	100	7	2.31	0.00826
45	GO:1902806	regulation of cell cycle G1/S phase transition	77	6	1.78	0.00855
45	GO:0070972	protein localization to endoplasmic reticulum	41	6	0.95	0.00885
45	GO:0031640	killing of cells of other organism	19	3	0.44	0.00893
45	GO:0043065	positive regulation of apoptotic process	328	15	7.56	0.00897
45	GO:0035914	skeletal muscle cell differentiation	36	4	0.83	0.0091
45	GO:0042133	neurotransmitter metabolic process	56	5	1.29	0.00917
45	GO:0032102	negative regulation of response to external stimulus	210	11	4.84	0.00938
45	GO:0038127	ERBB signaling pathway	71	8	1.64	0.00942
45	GO:0043281	regulation of cysteine-type endopeptidase activity involved in apoptotic process	103	7	2.37	0.00965
45	GO:0002064	epithelial cell development	129	8	2.97	0.00991
45	GO:0036491	regulation of translation initiation in response to endoplasmic reticulum stress	7	2	0.16	0.0103
45	GO:1901018	positive regulation of potassium ion transmembrane transporter activity	7	2	0.16	0.0103
45	GO:1901186	positive regulation of ERBB signaling pathway	20	3	0.46	0.01032
45	GO:1903307	positive regulation of regulated secretory pathway	20	3	0.46	0.01032
45	GO:0005996	monosaccharide metabolic process	130	8	3	0.01035
45	GO:0009166	nucleotide catabolic process	38	4	0.88	0.011
45	GO:0003018	vascular process in circulatory system	82	6	1.89	0.0115
45	GO:0009653	anatomical structure morphogenesis	1373	48	31.66	0.01155
45	GO:0046879	hormone secretion	133	8	3.07	0.01178
45	GO:0043114	regulation of vascular permeability	21	3	0.48	0.01184
45	GO:0042119	neutrophil activation	21	3	0.48	0.01184
45	GO:0033598	mammary gland epithelial cell proliferation	21	3	0.48	0.01184
45	GO:0050830	defense response to Gram-positive bacterium	39	4	0.9	0.01204
45	GO:0042987	amyloid precursor protein catabolic process	40	4	0.92	0.01314
45	GO:0045921	positive regulation of exocytosis	40	4	0.92	0.01314
45	GO:0097755	positive regulation of blood vessel diameter	22	3	0.51	0.01348
45	GO:0031272	regulation of pseudopodium assembly	8	2	0.18	0.01352
45	GO:0031274	positive regulation of pseudopodium assembly	8	2	0.18	0.01352
45	GO:0051883	killing of cells in other organism involved in symbiotic interaction	8	2	0.18	0.01352
45	GO:0060856	establishment of blood-brain barrier	8	2	0.18	0.01352
45	GO:0048240	sperm capacitation	8	2	0.18	0.01352
45	GO:0006983	ER overload response	8	2	0.18	0.01352
45	GO:1900103	positive regulation of endoplasmic reticulum unfolded protein response	8	2	0.18	0.01352
45	GO:0050930	induction of positive chemotaxis	8	2	0.18	0.01352
45	GO:0051712	positive regulation of killing of cells of other organism	8	2	0.18	0.01352
45	GO:0051709	regulation of killing of cells of other organism	8	2	0.18	0.01352
45	GO:0009914	hormone transport	137	8	3.16	0.0139
45	GO:0006919	activation of cysteine-type endopeptidase activity involved in apoptotic process	41	4	0.95	0.01431
45	GO:0006887	exocytosis	172	12	3.97	0.01451
45	GO:0048523	negative regulation of cellular process	2707	82	62.42	0.01471
45	GO:0048731	system development	2272	76	52.39	0.01505
45	GO:0090066	regulation of anatomical structure size	255	12	5.88	0.01509
45	GO:0009892	negative regulation of metabolic process	1670	53	38.51	0.01523
45	GO:0048194	Golgi vesicle budding	23	3	0.53	0.01525
45	GO:0140353	lipid export from cell	23	3	0.53	0.01525
45	GO:0048536	spleen development	23	3	0.53	0.01525
45	GO:0043001	Golgi to plasma membrane protein transport	23	3	0.53	0.01525
45	GO:1902235	regulation of endoplasmic reticulum stress-induced intrinsic apoptotic signaling pathway	23	3	0.53	0.01525
45	GO:0071470	cellular response to osmotic stress	23	3	0.53	0.01525
45	GO:1901016	regulation of potassium ion transmembrane transporter activity	23	3	0.53	0.01525
45	GO:0071216	cellular response to biotic stimulus	114	7	2.63	0.01622
45	GO:0050886	endocrine process	43	4	0.99	0.01683
45	GO:0032922	circadian regulation of gene expression	43	4	0.99	0.01683
45	GO:0016050	vesicle organization	142	8	3.27	0.01694
45	GO:0050708	regulation of protein secretion	115	7	2.65	0.01695
45	GO:0009158	ribonucleoside monophosphate catabolic process	9	2	0.21	0.01713
45	GO:0009159	deoxyribonucleoside monophosphate catabolic process	9	2	0.21	0.01713
45	GO:0001963	synaptic transmission, dopaminergic	9	2	0.21	0.01713
45	GO:0060433	bronchus development	9	2	0.21	0.01713
45	GO:0106049	regulation of cellular response to osmotic stress	9	2	0.21	0.01713
45	GO:0031269	pseudopodium assembly	9	2	0.21	0.01713
45	GO:0006890	retrograde vesicle-mediated transport, Golgi to endoplasmic reticulum	24	3	0.55	0.01713
45	GO:0048278	vesicle docking	24	3	0.55	0.01713
45	GO:1903524	positive regulation of blood circulation	24	3	0.55	0.01713
45	GO:0050678	regulation of epithelial cell proliferation	200	10	4.61	0.01746
45	GO:0007596	blood coagulation	90	6	2.08	0.01758
45	GO:0042391	regulation of membrane potential	143	8	3.3	0.0176
45	GO:0040012	regulation of locomotion	579	28	13.35	0.01765
45	GO:2000045	regulation of G1/S transition of mitotic cell cycle	66	5	1.52	0.01785
45	GO:0046903	secretion	423	26	9.75	0.01808
45	GO:0007599	hemostasis	91	6	2.1	0.01847
45	GO:0040013	negative regulation of locomotion	173	9	3.99	0.01872
45	GO:0010951	negative regulation of endopeptidase activity	67	5	1.54	0.01894
45	GO:0045444	fat cell differentiation	145	8	3.34	0.01897
45	GO:1905898	positive regulation of response to endoplasmic reticulum stress	25	3	0.58	0.01915
45	GO:0032731	positive regulation of interleukin-1 beta production	25	3	0.58	0.01915
45	GO:0036230	granulocyte activation	25	3	0.58	0.01915
45	GO:0060429	epithelium development	615	28	14.18	0.01945
45	GO:1901292	nucleoside phosphate catabolic process	45	4	1.04	0.01961
45	GO:0045321	leukocyte activation	494	19	11.39	0.01988
45	GO:1905897	regulation of response to endoplasmic reticulum stress	68	5	1.57	0.02007
45	GO:0043270	positive regulation of ion transport	119	7	2.74	0.02007
45	GO:0019318	hexose metabolic process	119	7	2.74	0.02007
45	GO:0046068	cGMP metabolic process	10	2	0.23	0.02109
45	GO:0048169	regulation of long-term neuronal synaptic plasticity	10	2	0.23	0.02109
45	GO:0071875	adrenergic receptor signaling pathway	10	2	0.23	0.02109
45	GO:0060670	branching involved in labyrinthine layer morphogenesis	10	2	0.23	0.02109
45	GO:0070262	peptidyl-serine dephosphorylation	10	2	0.23	0.02109
45	GO:0043558	regulation of translational initiation in response to stress	10	2	0.23	0.02109
45	GO:0015732	prostaglandin transport	10	2	0.23	0.02109
45	GO:0016486	peptide hormone processing	10	2	0.23	0.02109
45	GO:0032682	negative regulation of chemokine production	10	2	0.23	0.02109
45	GO:0047484	regulation of response to osmotic stress	10	2	0.23	0.02109
45	GO:0036490	regulation of translation in response to endoplasmic reticulum stress	10	2	0.23	0.02109
45	GO:0036499	PERK-mediated unfolded protein response	10	2	0.23	0.02109
45	GO:0034331	cell junction maintenance	10	2	0.23	0.02109
45	GO:0031268	pseudopodium organization	10	2	0.23	0.02109
45	GO:0009261	ribonucleotide catabolic process	26	3	0.6	0.02128
45	GO:0060612	adipose tissue development	26	3	0.6	0.02128
45	GO:1902003	regulation of amyloid-beta formation	26	3	0.6	0.02128
45	GO:2000377	regulation of reactive oxygen species metabolic process	94	6	2.17	0.02133
45	GO:0050817	coagulation	94	6	2.17	0.02133
45	GO:0051272	positive regulation of cellular component movement	333	14	7.68	0.0221
45	GO:1903522	regulation of blood circulation	95	6	2.19	0.02234
45	GO:0006006	glucose metabolic process	95	6	2.19	0.02234
45	GO:0030879	mammary gland development	70	5	1.61	0.02246
45	GO:0002685	regulation of leukocyte migration	122	7	2.81	0.02267
45	GO:0048247	lymphocyte chemotaxis	27	3	0.62	0.02355
45	GO:0050829	defense response to Gram-negative bacterium	27	3	0.62	0.02355
45	GO:0072593	reactive oxygen species metabolic process	151	8	3.48	0.02355
45	GO:0009611	response to wounding	253	16	5.83	0.02382
45	GO:0042982	amyloid precursor protein metabolic process	48	4	1.11	0.02428
45	GO:0060712	spongiotrophoblast layer development	11	2	0.25	0.02539
45	GO:0009125	nucleoside monophosphate catabolic process	11	2	0.25	0.02539
45	GO:0043116	negative regulation of vascular permeability	11	2	0.25	0.02539
45	GO:0061436	establishment of skin barrier	11	2	0.25	0.02539
45	GO:0034638	phosphatidylcholine catabolic process	11	2	0.25	0.02539
45	GO:0045579	positive regulation of B cell differentiation	11	2	0.25	0.02539
45	GO:0051782	negative regulation of cell division	11	2	0.25	0.02539
45	GO:0006820	anion transport	283	14	6.53	0.02542
45	GO:0008015	blood circulation	190	11	4.38	0.02548
45	GO:0005975	carbohydrate metabolic process	340	14	7.84	0.02585
45	GO:0070169	positive regulation of biomineral tissue development	28	3	0.65	0.02593
45	GO:0031018	endocrine pancreas development	28	3	0.65	0.02593
45	GO:0097352	autophagosome maturation	28	3	0.65	0.02593
45	GO:0032653	regulation of interleukin-10 production	28	3	0.65	0.02593
45	GO:0032613	interleukin-10 production	28	3	0.65	0.02593
45	GO:0031099	regeneration	49	4	1.13	0.02597
45	GO:0044057	regulation of system process	214	10	4.93	0.02647
45	GO:1902905	positive regulation of supramolecular fiber organization	126	7	2.91	0.02647
45	GO:0007173	epidermal growth factor receptor signaling pathway	64	7	1.48	0.02674
45	GO:0006469	negative regulation of protein kinase activity	127	7	2.93	0.02749
45	GO:0010466	negative regulation of peptidase activity	74	5	1.71	0.02779
45	GO:0009749	response to glucose	74	5	1.71	0.02779
45	GO:1903793	positive regulation of anion transport	29	3	0.67	0.02845
45	GO:1902991	regulation of amyloid precursor protein catabolic process	29	3	0.67	0.02845
45	GO:0030104	water homeostasis	29	3	0.67	0.02845
45	GO:2000404	regulation of T cell migration	29	3	0.67	0.02845
45	GO:0050873	brown fat cell differentiation	29	3	0.67	0.02845
45	GO:0110151	positive regulation of biomineralization	29	3	0.67	0.02845
45	GO:0001775	cell activation	549	20	12.66	0.02859
45	GO:0051348	negative regulation of transferase activity	157	8	3.62	0.02886
45	GO:0022414	reproductive process	585	21	13.49	0.02901
45	GO:0015748	organophosphate ester transport	75	5	1.73	0.02924
45	GO:0000003	reproduction	586	21	13.51	0.02948
45	GO:0009164	nucleoside catabolic process	17	4	0.39	0.02956
45	GO:0051248	negative regulation of protein metabolic process	597	23	13.77	0.02961
45	GO:0009162	deoxyribonucleoside monophosphate metabolic process	12	2	0.28	0.03001
45	GO:0003081	regulation of systemic arterial blood pressure by renin-angiotensin	12	2	0.28	0.03001
45	GO:1901381	positive regulation of potassium ion transmembrane transport	12	2	0.28	0.03001
45	GO:0035970	peptidyl-threonine dephosphorylation	12	2	0.28	0.03001
45	GO:0140448	signaling receptor ligand precursor processing	12	2	0.28	0.03001
45	GO:0071501	cellular response to sterol depletion	12	2	0.28	0.03001
45	GO:0090110	COPII-coated vesicle cargo loading	12	2	0.28	0.03001
45	GO:0032967	positive regulation of collagen biosynthetic process	12	2	0.28	0.03001
45	GO:0032933	SREBP signaling pathway	12	2	0.28	0.03001
45	GO:0002791	regulation of peptide secretion	130	7	3	0.03069
45	GO:0034284	response to monosaccharide	76	5	1.75	0.03073
45	GO:0009746	response to hexose	76	5	1.75	0.03073
45	GO:0006893	Golgi to plasma membrane transport	30	3	0.69	0.03108
45	GO:0009123	nucleoside monophosphate metabolic process	30	3	0.69	0.03108
45	GO:0071705	nitrogen compound transport	947	37	21.84	0.03137
45	GO:0008285	negative regulation of cell population proliferation	384	15	8.85	0.03233
45	GO:0019882	antigen processing and presentation	53	4	1.22	0.03345
45	GO:1901379	regulation of potassium ion transmembrane transport	31	3	0.71	0.03384
45	GO:0046503	glycerolipid catabolic process	31	3	0.71	0.03384
45	GO:0008016	regulation of heart contraction	78	5	1.8	0.03386
45	GO:0002263	cell activation involved in immune response	162	8	3.74	0.03388
45	GO:0009888	tissue development	986	40	22.73	0.03393
45	GO:0042445	hormone metabolic process	105	6	2.42	0.03431
45	GO:0040017	positive regulation of locomotion	337	16	7.77	0.03434
45	GO:0034656	nucleobase-containing small molecule catabolic process	18	4	0.42	0.03442
45	GO:0060284	regulation of cell development	422	16	9.73	0.03493
45	GO:0033623	regulation of integrin activation	13	2	0.3	0.03493
45	GO:0046386	deoxyribose phosphate catabolic process	13	2	0.3	0.03493
45	GO:0010714	positive regulation of collagen metabolic process	13	2	0.3	0.03493
45	GO:0006991	response to sterol depletion	13	2	0.3	0.03493
45	GO:0043555	regulation of translation in response to stress	13	2	0.3	0.03493
45	GO:0033561	regulation of water loss via skin	13	2	0.3	0.03493
45	GO:0071774	response to fibroblast growth factor	54	4	1.25	0.0355
45	GO:0044344	cellular response to fibroblast growth factor stimulus	54	4	1.25	0.0355
45	GO:0045582	positive regulation of T cell differentiation	54	4	1.25	0.0355
45	GO:0035150	regulation of tube size	54	4	1.25	0.0355
45	GO:0048660	regulation of smooth muscle cell proliferation	54	4	1.25	0.0355
45	GO:0035296	regulation of tube diameter	54	4	1.25	0.0355
45	GO:0097746	regulation of blood vessel diameter	54	4	1.25	0.0355
45	GO:1901184	regulation of ERBB signaling pathway	46	6	1.06	0.03568
45	GO:0010605	negative regulation of macromolecule metabolic process	1521	47	35.07	0.03664
45	GO:0034205	amyloid-beta formation	32	3	0.74	0.03673
45	GO:0120192	tight junction assembly	32	3	0.74	0.03673
45	GO:0001836	release of cytochrome c from mitochondria	32	3	0.74	0.03673
45	GO:0006900	vesicle budding from membrane	32	3	0.74	0.03673
45	GO:0022408	negative regulation of cell-cell adhesion	107	6	2.47	0.03712
45	GO:0008637	apoptotic mitochondrial changes	55	4	1.27	0.03761
45	GO:0032502	developmental process	2980	93	68.71	0.03762
45	GO:0051172	negative regulation of nitrogen compound metabolic process	1290	41	29.74	0.03791
45	GO:2000146	negative regulation of cell motility	166	8	3.83	0.03829
45	GO:0009743	response to carbohydrate	81	5	1.87	0.03891
45	GO:2000147	positive regulation of cell motility	327	13	7.54	0.03957
45	GO:0061951	establishment of protein localization to plasma membrane	33	3	0.76	0.03973
45	GO:1990928	response to amino acid starvation	33	3	0.76	0.03973
45	GO:0034198	cellular response to amino acid starvation	33	3	0.76	0.03973
45	GO:0048659	smooth muscle cell proliferation	56	4	1.29	0.0398
45	GO:0034404	nucleobase-containing small molecule biosynthetic process	56	4	1.29	0.0398
45	GO:0009264	deoxyribonucleotide catabolic process	14	2	0.32	0.04014
45	GO:0043268	positive regulation of potassium ion transport	14	2	0.32	0.04014
45	GO:0046329	negative regulation of JNK cascade	14	2	0.32	0.04014
45	GO:0006040	amino sugar metabolic process	14	2	0.32	0.04014
45	GO:0035459	vesicle cargo loading	14	2	0.32	0.04014
45	GO:0048668	collateral sprouting	14	2	0.32	0.04014
45	GO:0030517	negative regulation of axon extension	14	2	0.32	0.04014
45	GO:2000679	positive regulation of transcription regulatory region DNA binding	14	2	0.32	0.04014
45	GO:0032965	regulation of collagen biosynthetic process	14	2	0.32	0.04014
45	GO:0071396	cellular response to lipid	262	11	6.04	0.04027
45	GO:0033673	negative regulation of kinase activity	138	7	3.18	0.04045
45	GO:0009132	nucleoside diphosphate metabolic process	82	5	1.89	0.04068
45	GO:0022612	gland morphogenesis	82	5	1.89	0.04068
45	GO:0031324	negative regulation of cellular metabolic process	1415	44	32.63	0.0411
45	GO:0034612	response to tumor necrosis factor	110	6	2.54	0.0416
45	GO:0071805	potassium ion transmembrane transport	57	4	1.31	0.04206
45	GO:0003013	circulatory system process	208	11	4.8	0.04246
45	GO:0007050	cell cycle arrest	83	5	1.91	0.04251
45	GO:0030073	insulin secretion	83	5	1.91	0.04251
45	GO:0030155	regulation of cell adhesion	433	16	9.98	0.04255
45	GO:0090559	regulation of membrane permeability	34	3	0.78	0.04286
45	GO:0043266	regulation of potassium ion transport	34	3	0.78	0.04286
45	GO:0007275	multicellular organism development	2477	78	57.11	0.04306
45	GO:0033993	response to lipid	339	18	7.82	0.04391
45	GO:0032535	regulation of cellular component size	202	9	4.66	0.04429
45	GO:0046031	ADP metabolic process	58	4	1.34	0.04439
45	GO:0046135	pyrimidine nucleoside catabolic process	7	3	0.16	0.04522
45	GO:0006213	pyrimidine nucleoside metabolic process	7	3	0.16	0.04522
45	GO:0060713	labyrinthine layer morphogenesis	15	2	0.35	0.04563
45	GO:0071276	cellular response to cadmium ion	15	2	0.35	0.04563
45	GO:0044058	regulation of digestive system process	15	2	0.35	0.04563
45	GO:0046337	phosphatidylethanolamine metabolic process	15	2	0.35	0.04563
45	GO:1902992	negative regulation of amyloid precursor protein catabolic process	15	2	0.35	0.04563
45	GO:0051937	catecholamine transport	15	2	0.35	0.04563
45	GO:0150105	protein localization to cell-cell junction	15	2	0.35	0.04563
45	GO:1902236	negative regulation of endoplasmic reticulum stress-induced intrinsic apoptotic signaling pathway	15	2	0.35	0.04563
45	GO:0070633	transepithelial transport	15	2	0.35	0.04563
45	GO:0007589	body fluid secretion	35	3	0.81	0.0461
45	GO:0050728	negative regulation of inflammatory response	85	5	1.96	0.04632
45	GO:0043523	regulation of neuron apoptotic process	85	5	1.96	0.04632
45	GO:0048568	embryonic organ development	236	10	5.44	0.0467
45	GO:0050714	positive regulation of protein secretion	59	4	1.36	0.04679
45	GO:0006753	nucleoside phosphate metabolic process	269	11	6.2	0.04715
45	GO:0051270	regulation of cellular component movement	592	26	13.65	0.04751
45	GO:0002274	myeloid leukocyte activation	114	6	2.63	0.04809
45	GO:0003006	developmental process involved in reproduction	406	15	9.36	0.04867
45	GO:0001892	embryonic placenta development	60	4	1.38	0.04926
45	GO:0120193	tight junction organization	36	3	0.83	0.04947
45	GO:0043154	negative regulation of cysteine-type endopeptidase activity involved in apoptotic process	36	3	0.83	0.04947
45	GO:0032722	positive regulation of chemokine production	36	3	0.83	0.04947
45	GO:0006970	response to osmotic stress	36	3	0.83	0.04947
45	GO:0002526	acute inflammatory response	36	3	0.83	0.04947
50	GO:0007169	transmembrane receptor protein tyrosine kinase signaling pathway	333	52	25.52	0.00011
50	GO:0007015	actin filament organization	245	42	18.77	0.00011
50	GO:0060841	venous blood vessel development	8	5	0.61	0.00012
50	GO:0014911	positive regulation of smooth muscle cell migration	12	6	0.92	0.00012
50	GO:0001946	lymphangiogenesis	12	6	0.92	0.00012
50	GO:0032516	positive regulation of phosphoprotein phosphatase activity	12	6	0.92	0.00012
50	GO:0032967	positive regulation of collagen biosynthetic process	12	6	0.92	0.00012
50	GO:1901201	regulation of extracellular matrix assembly	12	6	0.92	0.00012
50	GO:0003007	heart morphogenesis	134	30	10.27	0.00014
50	GO:0048565	digestive tract development	68	15	5.21	0.00015
50	GO:0061028	establishment of endothelial barrier	34	10	2.61	0.00016
50	GO:2000669	negative regulation of dendritic cell apoptotic process	5	4	0.38	0.00016
50	GO:0060839	endothelial cell fate commitment	5	4	0.38	0.00016
50	GO:0022614	membrane to membrane docking	5	4	0.38	0.00016
50	GO:0007266	Rho protein signal transduction	67	17	5.13	0.00019
50	GO:0010812	negative regulation of cell-substrate adhesion	35	12	2.68	0.00021
50	GO:0051496	positive regulation of stress fiber assembly	35	10	2.68	0.00021
50	GO:0030574	collagen catabolic process	13	6	1	0.00021
50	GO:0002693	positive regulation of cellular extravasation	13	6	1	0.00021
50	GO:0045668	negative regulation of osteoblast differentiation	29	9	2.22	0.00021
50	GO:0030279	negative regulation of ossification	47	16	3.6	0.00021
50	GO:0060047	heart contraction	94	18	7.2	0.00024
50	GO:0032060	bleb assembly	9	5	0.69	0.00025
50	GO:0001765	membrane raft assembly	9	5	0.69	0.00025
50	GO:2000403	positive regulation of lymphocyte migration	24	8	1.84	0.00028
50	GO:0007519	skeletal muscle tissue development	80	16	6.13	0.00031
50	GO:0034446	substrate adhesion-dependent cell spreading	69	18	5.29	0.00032
50	GO:0045687	positive regulation of glial cell differentiation	19	7	1.46	0.00034
50	GO:0010862	positive regulation of pathway-restricted SMAD protein phosphorylation	19	7	1.46	0.00034
50	GO:0003180	aortic valve morphogenesis	14	6	1.07	0.00035
50	GO:0051894	positive regulation of focal adhesion assembly	14	6	1.07	0.00035
50	GO:0110110	positive regulation of animal organ morphogenesis	44	11	3.37	0.00037
50	GO:2000249	regulation of actin cytoskeleton reorganization	25	8	1.92	0.00038
50	GO:0030195	negative regulation of blood coagulation	25	8	1.92	0.00038
50	GO:0085029	extracellular matrix assembly	29	16	2.22	0.00045
50	GO:0048505	regulation of timing of cell differentiation	6	4	0.46	0.00045
50	GO:0086103	G protein-coupled receptor signaling pathway involved in heart process	6	4	0.46	0.00045
50	GO:0045019	negative regulation of nitric oxide biosynthetic process	6	4	0.46	0.00045
50	GO:0061439	kidney vasculature morphogenesis	6	4	0.46	0.00045
50	GO:0061299	retina vasculature morphogenesis in camera-type eye	6	4	0.46	0.00045
50	GO:0048844	artery morphogenesis	38	15	2.91	0.00046
50	GO:0007263	nitric oxide mediated signal transduction	10	5	0.77	0.00047
50	GO:0003198	epithelial to mesenchymal transition involved in endocardial cushion formation	10	5	0.77	0.00047
50	GO:0071229	cellular response to acid chemical	91	17	6.97	0.00048
50	GO:0060485	mesenchyme development	153	40	11.72	0.00048
50	GO:0048745	smooth muscle tissue development	15	6	1.15	0.00054
50	GO:0051491	positive regulation of filopodium assembly	15	6	1.15	0.00054
50	GO:0033627	cell adhesion mediated by integrin	46	11	3.52	0.00055
50	GO:0048593	camera-type eye morphogenesis	61	13	4.67	0.00059
50	GO:0001954	positive regulation of cell-matrix adhesion	35	13	2.68	0.00065
50	GO:0002690	positive regulation of leukocyte chemotaxis	55	12	4.21	0.00076
50	GO:0050901	leukocyte tethering or rolling	17	8	1.3	0.0008
50	GO:0061036	positive regulation of cartilage development	16	6	1.23	0.00082
50	GO:0045429	positive regulation of nitric oxide biosynthetic process	16	6	1.23	0.00082
50	GO:0051241	negative regulation of multicellular organismal process	643	105	49.27	0.00082
50	GO:2001026	regulation of endothelial cell chemotaxis	11	5	0.84	0.00082
50	GO:1904752	regulation of vascular associated smooth muscle cell migration	11	5	0.84	0.00082
50	GO:0072678	T cell migration	41	10	3.14	0.00083
50	GO:0070374	positive regulation of ERK1 and ERK2 cascade	104	18	7.97	0.00085
50	GO:1904035	regulation of epithelial cell apoptotic process	49	14	3.75	0.00086
50	GO:0009611	response to wounding	253	52	19.39	0.00087
50	GO:0071407	cellular response to organic cyclic compound	259	38	19.85	0.00087
50	GO:0007229	integrin-mediated signaling pathway	61	15	4.67	0.00088
50	GO:0050922	negative regulation of chemotaxis	28	8	2.15	0.00089
50	GO:0035987	endodermal cell differentiation	28	8	2.15	0.00089
50	GO:1904645	response to amyloid-beta	22	7	1.69	0.00093
50	GO:0010466	negative regulation of peptidase activity	74	17	5.67	0.00095
50	GO:0010712	regulation of collagen metabolic process	19	10	1.46	0.00097
50	GO:0001938	positive regulation of endothelial cell proliferation	49	11	3.75	0.00098
50	GO:1903019	negative regulation of glycoprotein metabolic process	7	4	0.54	0.00099
50	GO:0044829	positive regulation by host of viral genome replication	7	4	0.54	0.00099
50	GO:0071902	positive regulation of protein serine/threonine kinase activity	159	24	12.18	0.00101
50	GO:0007219	Notch signaling pathway	97	17	7.43	0.00102
50	GO:0032870	cellular response to hormone stimulus	262	38	20.08	0.00108
50	GO:0060389	pathway-restricted SMAD protein phosphorylation	36	13	2.76	0.00114
50	GO:0003148	outflow tract septum morphogenesis	17	6	1.3	0.00118
50	GO:0048747	muscle fiber development	23	7	1.76	0.00125
50	GO:0016477	cell migration	792	164	60.69	0.00125
50	GO:0007520	myoblast fusion	22	9	1.69	0.00129
50	GO:1904996	positive regulation of leukocyte adhesion to vascular endothelial cell	12	5	0.92	0.00131
50	GO:0006910	phagocytosis, recognition	12	5	0.92	0.00131
50	GO:0010951	negative regulation of endopeptidase activity	67	13	5.13	0.0015
50	GO:0043410	positive regulation of MAPK cascade	270	42	20.69	0.00154
50	GO:0042698	ovulation cycle	24	7	1.84	0.00164
50	GO:0060038	cardiac muscle cell proliferation	18	6	1.38	0.00165
50	GO:0071711	basement membrane organization	18	6	1.38	0.00165
50	GO:0060348	bone development	128	20	9.81	0.00168
50	GO:0008585	female gonad development	45	10	3.45	0.00179
50	GO:0001935	endothelial cell proliferation	90	25	6.9	0.00184
50	GO:0072109	glomerular mesangium development	8	4	0.61	0.00186
50	GO:0060352	cell adhesion molecule production	8	4	0.61	0.00186
50	GO:0097709	connective tissue replacement	8	4	0.61	0.00186
50	GO:0090303	positive regulation of wound healing	38	9	2.91	0.00187
50	GO:0071222	cellular response to lipopolysaccharide	94	16	7.2	0.00194
50	GO:0048661	positive regulation of smooth muscle cell proliferation	29	10	2.22	0.00195
50	GO:1902532	negative regulation of intracellular signal transduction	322	42	24.67	0.00199
50	GO:0044342	type B pancreatic cell proliferation	13	5	1	0.002
50	GO:0072574	hepatocyte proliferation	13	5	1	0.002
50	GO:0071295	cellular response to vitamin	13	5	1	0.002
50	GO:0014829	vascular smooth muscle contraction	13	5	1	0.002
50	GO:0048675	axon extension	46	10	3.52	0.00213
50	GO:0030168	platelet activation	46	10	3.52	0.00213
50	GO:0030511	positive regulation of transforming growth factor beta receptor signaling pathway	25	7	1.92	0.00213
50	GO:0044344	cellular response to fibroblast growth factor stimulus	54	11	4.14	0.00226
50	GO:0033688	regulation of osteoblast proliferation	19	6	1.46	0.00226
50	GO:0003254	regulation of membrane depolarization	19	6	1.46	0.00226
50	GO:1905521	regulation of macrophage migration	19	6	1.46	0.00226
50	GO:1900026	positive regulation of substrate adhesion-dependent cell spreading	32	8	2.45	0.0023
50	GO:0060443	mammary gland morphogenesis	32	8	2.45	0.0023
50	GO:0048771	tissue remodeling	91	20	6.97	0.00247
50	GO:0008217	regulation of blood pressure	61	14	4.67	0.00257
50	GO:0072659	protein localization to plasma membrane	161	23	12.34	0.00266
50	GO:0051153	regulation of striated muscle cell differentiation	50	13	3.83	0.00266
50	GO:0030513	positive regulation of BMP signaling pathway	26	7	1.99	0.00273
50	GO:0010524	positive regulation of calcium ion transport into cytosol	26	7	1.99	0.00273
50	GO:0050678	regulation of epithelial cell proliferation	200	42	15.33	0.0028
50	GO:0042127	regulation of cell population proliferation	874	134	66.97	0.00284
50	GO:0045603	positive regulation of endothelial cell differentiation	14	5	1.07	0.00291
50	GO:0018149	peptide cross-linking	14	5	1.07	0.00291
50	GO:0048246	macrophage chemotaxis	20	6	1.53	0.00303
50	GO:0060325	face morphogenesis	20	6	1.53	0.00303
50	GO:0007044	cell-substrate junction assembly	55	15	4.21	0.00314
50	GO:1903054	negative regulation of extracellular matrix organization	9	4	0.69	0.00315
50	GO:0010935	regulation of macrophage cytokine production	9	4	0.69	0.00315
50	GO:1902043	positive regulation of extrinsic apoptotic signaling pathway via death domain receptors	9	4	0.69	0.00315
50	GO:0003157	endocardium development	9	4	0.69	0.00315
50	GO:0060644	mammary gland epithelial cell differentiation	9	4	0.69	0.00315
50	GO:0010763	positive regulation of fibroblast migration	9	4	0.69	0.00315
50	GO:0045669	positive regulation of osteoblast differentiation	41	9	3.14	0.00327
50	GO:0048871	multicellular organismal homeostasis	233	30	17.85	0.00339
50	GO:0001947	heart looping	27	7	2.07	0.00345
50	GO:0038084	vascular endothelial growth factor signaling pathway	27	7	2.07	0.00345
50	GO:0045944	positive regulation of transcription by RNA polymerase II	698	73	53.49	0.0035
50	GO:0097581	lamellipodium organization	57	11	4.37	0.00353
50	GO:0002040	sprouting angiogenesis	82	19	6.28	0.00366
50	GO:0045785	positive regulation of cell adhesion	255	54	19.54	0.0038
50	GO:0071773	cellular response to BMP stimulus	90	21	6.9	0.00392
50	GO:0035767	endothelial cell chemotaxis	16	8	1.23	0.00392
50	GO:0007188	adenylate cyclase-modulating G protein-coupled receptor signaling pathway	66	12	5.06	0.00395
50	GO:0010611	regulation of cardiac muscle hypertrophy	21	6	1.61	0.00397
50	GO:2000352	negative regulation of endothelial cell apoptotic process	21	6	1.61	0.00397
50	GO:0071363	cellular response to growth factor stimulus	348	78	26.67	0.00397
50	GO:0010739	positive regulation of protein kinase A signaling	5	3	0.38	0.00399
50	GO:1901842	negative regulation of high voltage-gated calcium channel activity	5	3	0.38	0.00399
50	GO:0021888	hypothalamus gonadotrophin-releasing hormone neuron development	5	3	0.38	0.00399
50	GO:2001046	positive regulation of integrin-mediated signaling pathway	5	3	0.38	0.00399
50	GO:0072239	metanephric glomerulus vasculature development	5	3	0.38	0.00399
50	GO:0060315	negative regulation of ryanodine-sensitive calcium-release channel activity	5	3	0.38	0.00399
50	GO:0021957	corticospinal tract morphogenesis	5	3	0.38	0.00399
50	GO:0008627	intrinsic apoptotic signaling pathway in response to osmotic stress	5	3	0.38	0.00399
50	GO:0060842	arterial endothelial cell differentiation	5	3	0.38	0.00399
50	GO:0060502	epithelial cell proliferation involved in lung morphogenesis	5	3	0.38	0.00399
50	GO:0002468	dendritic cell antigen processing and presentation	5	3	0.38	0.00399
50	GO:1902285	semaphorin-plexin signaling pathway involved in neuron projection guidance	5	3	0.38	0.00399
50	GO:0009886	post-embryonic animal morphogenesis	5	3	0.38	0.00399
50	GO:1901164	negative regulation of trophoblast cell migration	5	3	0.38	0.00399
50	GO:1901166	neural crest cell migration involved in autonomic nervous system development	5	3	0.38	0.00399
50	GO:0072007	mesangial cell differentiation	5	3	0.38	0.00399
50	GO:1902992	negative regulation of amyloid precursor protein catabolic process	15	5	1.15	0.00409
50	GO:0060055	angiogenesis involved in wound healing	15	5	1.15	0.00409
50	GO:0071385	cellular response to glucocorticoid stimulus	15	5	1.15	0.00409
50	GO:0045214	sarcomere organization	15	5	1.15	0.00409
50	GO:0051216	cartilage development	103	22	7.89	0.00416
50	GO:0034109	homotypic cell-cell adhesion	35	8	2.68	0.0042
50	GO:0001658	branching involved in ureteric bud morphogenesis	28	7	2.15	0.0043
50	GO:1903672	positive regulation of sprouting angiogenesis	28	7	2.15	0.0043
50	GO:0051051	negative regulation of transport	207	31	15.86	0.00439
50	GO:1901654	response to ketone	53	13	4.06	0.00447
50	GO:0048568	embryonic organ development	236	37	18.08	0.00468
50	GO:0071621	granulocyte chemotaxis	51	10	3.91	0.00472
50	GO:0050680	negative regulation of epithelial cell proliferation	90	22	6.9	0.00489
50	GO:0051580	regulation of neurotransmitter uptake	10	4	0.77	0.00494
50	GO:0042573	retinoic acid metabolic process	10	4	0.77	0.00494
50	GO:1901741	positive regulation of myoblast fusion	10	4	0.77	0.00494
50	GO:0034695	response to prostaglandin E	10	4	0.77	0.00494
50	GO:0051145	smooth muscle cell differentiation	42	11	3.22	0.00495
50	GO:0071674	mononuclear cell migration	38	11	2.91	0.00499
50	GO:0009612	response to mechanical stimulus	68	12	5.21	0.00507
50	GO:0050918	positive chemotaxis	22	6	1.69	0.00511
50	GO:0001953	negative regulation of cell-matrix adhesion	22	6	1.69	0.00511
50	GO:0060441	epithelial tube branching involved in lung morphogenesis	22	6	1.69	0.00511
50	GO:0022612	gland morphogenesis	82	24	6.28	0.00517
50	GO:0010631	epithelial cell migration	191	48	14.64	0.00526
50	GO:0007417	central nervous system development	411	51	31.49	0.00528
50	GO:0090049	regulation of cell migration involved in sprouting angiogenesis	29	7	2.22	0.0053
50	GO:0000122	negative regulation of transcription by RNA polymerase II	486	53	37.24	0.00536
50	GO:0035023	regulation of Rho protein signal transduction	44	9	3.37	0.00539
50	GO:0060429	epithelium development	615	96	47.13	0.00549
50	GO:0001709	cell fate determination	16	5	1.23	0.00558
50	GO:1900027	regulation of ruffle assembly	16	5	1.23	0.00558
50	GO:1904707	positive regulation of vascular smooth muscle cell proliferation	16	5	1.23	0.00558
50	GO:1900271	regulation of long-term synaptic potentiation	16	5	1.23	0.00558
50	GO:0090025	regulation of monocyte chemotaxis	16	5	1.23	0.00558
50	GO:1904031	positive regulation of cyclin-dependent protein kinase activity	16	5	1.23	0.00558
50	GO:0030336	negative regulation of cell migration	156	34	11.95	0.00566
50	GO:0001666	response to hypoxia	123	18	9.43	0.00572
50	GO:0050808	synapse organization	162	22	12.41	0.00602
50	GO:0030334	regulation of cell migration	530	116	40.61	0.00605
50	GO:0001890	placenta development	96	15	7.36	0.00609
50	GO:0045666	positive regulation of neuron differentiation	143	20	10.96	0.0062
50	GO:0043066	negative regulation of apoptotic process	467	62	35.79	0.00627
50	GO:0070167	regulation of biomineral tissue development	54	13	4.14	0.00628
50	GO:0050877	nervous system process	327	38	25.06	0.00631
50	GO:0071345	cellular response to cytokine stimulus	415	50	31.8	0.00636
50	GO:0007517	muscle organ development	149	31	11.42	0.00636
50	GO:0048608	reproductive structure development	229	38	17.55	0.00641
50	GO:0043524	negative regulation of neuron apoptotic process	70	12	5.36	0.00644
50	GO:0002686	negative regulation of leukocyte migration	30	7	2.3	0.00646
50	GO:0070830	bicellular tight junction assembly	30	7	2.3	0.00646
50	GO:0055010	ventricular cardiac muscle tissue morphogenesis	23	6	1.76	0.00647
50	GO:0007435	salivary gland morphogenesis	23	6	1.76	0.00647
50	GO:1905332	positive regulation of morphogenesis of an epithelium	23	6	1.76	0.00647
50	GO:0034332	adherens junction organization	23	6	1.76	0.00647
50	GO:0048048	embryonic eye morphogenesis	23	6	1.76	0.00647
50	GO:0043588	skin development	134	19	10.27	0.0065
50	GO:0009888	tissue development	986	163	75.56	0.00678
50	GO:0010594	regulation of endothelial cell migration	109	28	8.35	0.00679
50	GO:0045216	cell-cell junction organization	96	20	7.36	0.00688
50	GO:0046718	viral entry into host cell	38	8	2.91	0.00712
50	GO:0043536	positive regulation of blood vessel endothelial cell migration	38	8	2.91	0.00712
50	GO:0045663	positive regulation of myoblast differentiation	11	4	0.84	0.0073
50	GO:0003094	glomerular filtration	11	4	0.84	0.0073
50	GO:0060421	positive regulation of heart growth	11	4	0.84	0.0073
50	GO:1904706	negative regulation of vascular smooth muscle cell proliferation	11	4	0.84	0.0073
50	GO:0003214	cardiac left ventricle morphogenesis	11	4	0.84	0.0073
50	GO:0019934	cGMP-mediated signaling	11	4	0.84	0.0073
50	GO:0034383	low-density lipoprotein particle clearance	11	4	0.84	0.0073
50	GO:0043567	regulation of insulin-like growth factor receptor signaling pathway	11	4	0.84	0.0073
50	GO:0007156	homophilic cell adhesion via plasma membrane adhesion molecules	46	9	3.52	0.0073
50	GO:0055025	positive regulation of cardiac muscle tissue development	17	5	1.3	0.00742
50	GO:0010894	negative regulation of steroid biosynthetic process	17	5	1.3	0.00742
50	GO:0035089	establishment of apical/basal cell polarity	17	5	1.3	0.00742
50	GO:0014904	myotube cell development	17	5	1.3	0.00742
50	GO:0050919	negative chemotaxis	17	5	1.3	0.00742
50	GO:0043552	positive regulation of phosphatidylinositol 3-kinase activity	17	5	1.3	0.00742
50	GO:0061311	cell surface receptor signaling pathway involved in heart development	17	5	1.3	0.00742
50	GO:0110111	negative regulation of animal organ morphogenesis	17	5	1.3	0.00742
50	GO:2000209	regulation of anoikis	17	5	1.3	0.00742
50	GO:1902547	regulation of cellular response to vascular endothelial growth factor stimulus	17	5	1.3	0.00742
50	GO:0045605	negative regulation of epidermal cell differentiation	6	3	0.46	0.00752
50	GO:0061549	sympathetic ganglion development	6	3	0.46	0.00752
50	GO:0045907	positive regulation of vasoconstriction	6	3	0.46	0.00752
50	GO:0072205	metanephric collecting duct development	6	3	0.46	0.00752
50	GO:0003071	renal system process involved in regulation of systemic arterial blood pressure	6	3	0.46	0.00752
50	GO:0001955	blood vessel maturation	6	3	0.46	0.00752
50	GO:0010958	regulation of amino acid import across plasma membrane	6	3	0.46	0.00752
50	GO:0060435	bronchiole development	6	3	0.46	0.00752
50	GO:0019886	antigen processing and presentation of exogenous peptide antigen via MHC class II	6	3	0.46	0.00752
50	GO:0072672	neutrophil extravasation	6	3	0.46	0.00752
50	GO:0035754	B cell chemotaxis	6	3	0.46	0.00752
50	GO:1903236	regulation of leukocyte tethering or rolling	6	3	0.46	0.00752
50	GO:0003256	regulation of transcription from RNA polymerase II promoter involved in myocardial precursor cell differentiation	6	3	0.46	0.00752
50	GO:2000048	negative regulation of cell-cell adhesion mediated by cadherin	6	3	0.46	0.00752
50	GO:0097084	vascular smooth muscle cell development	6	3	0.46	0.00752
50	GO:0060638	mesenchymal-epithelial cell signaling	6	3	0.46	0.00752
50	GO:0002291	T cell activation via T cell receptor contact with antigen bound to MHC molecule on antigen presenting cell	6	3	0.46	0.00752
50	GO:0070307	lens fiber cell development	6	3	0.46	0.00752
50	GO:1903961	positive regulation of anion transmembrane transport	6	3	0.46	0.00752
50	GO:0072070	loop of Henle development	6	3	0.46	0.00752
50	GO:0090715	immunological memory formation process	6	3	0.46	0.00752
50	GO:2000535	regulation of entry of bacterium into host cell	6	3	0.46	0.00752
50	GO:0006936	muscle contraction	121	21	9.27	0.00754
50	GO:1901653	cellular response to peptide	146	20	11.19	0.0078
50	GO:0030514	negative regulation of BMP signaling pathway	31	7	2.38	0.00781
50	GO:0032330	regulation of chondrocyte differentiation	31	7	2.38	0.00781
50	GO:0008285	negative regulation of cell population proliferation	384	58	29.43	0.00796
50	GO:0001569	branching involved in blood vessel morphogenesis	24	6	1.84	0.00808
50	GO:0030501	positive regulation of bone mineralization	24	6	1.84	0.00808
50	GO:0043113	receptor clustering	24	6	1.84	0.00808
50	GO:0042246	tissue regeneration	24	6	1.84	0.00808
50	GO:2000826	regulation of heart morphogenesis	24	6	1.84	0.00808
50	GO:0030512	negative regulation of transforming growth factor beta receptor signaling pathway	47	9	3.6	0.00844
50	GO:1901342	regulation of vasculature development	202	51	15.48	0.00893
50	GO:0010595	positive regulation of endothelial cell migration	70	15	5.36	0.00903
50	GO:0042493	response to drug	367	41	28.12	0.00908
50	GO:0048863	stem cell differentiation	112	21	8.58	0.00917
50	GO:0002696	positive regulation of leukocyte activation	178	23	13.64	0.00917
50	GO:0002067	glandular epithelial cell differentiation	32	7	2.45	0.00935
50	GO:0034103	regulation of tissue remodeling	32	7	2.45	0.00935
50	GO:1990869	cellular response to chemokine	32	7	2.45	0.00935
50	GO:0072001	renal system development	167	31	12.8	0.00935
50	GO:0022408	negative regulation of cell-cell adhesion	107	18	8.2	0.00944
50	GO:0016055	Wnt signaling pathway	240	29	18.39	0.00948
50	GO:0071470	cellular response to osmotic stress	23	8	1.76	0.0095
50	GO:0048545	response to steroid hormone	107	19	8.2	0.00954
50	GO:0070663	regulation of leukocyte proliferation	139	19	10.65	0.00957
50	GO:0030193	regulation of blood coagulation	50	14	3.83	0.00959
50	GO:0048333	mesodermal cell differentiation	18	5	1.38	0.00964
50	GO:1990000	amyloid fibril formation	18	5	1.38	0.00964
50	GO:0061384	heart trabecula morphogenesis	18	5	1.38	0.00964
50	GO:0055094	response to lipoprotein particle	18	5	1.38	0.00964
50	GO:0055007	cardiac muscle cell differentiation	48	9	3.68	0.0097
50	GO:0060395	SMAD protein signal transduction	40	8	3.07	0.00978
50	GO:0006898	receptor-mediated endocytosis	120	17	9.2	0.0098
50	GO:1902904	negative regulation of supramolecular fiber organization	92	14	7.05	0.00995
50	GO:0007600	sensory perception	130	18	9.96	0.0101
50	GO:0043491	protein kinase B signaling	110	24	8.43	0.01021
50	GO:0007159	leukocyte cell-cell adhesion	207	35	15.86	0.01023
50	GO:0048846	axon extension involved in axon guidance	12	4	0.92	0.01029
50	GO:0071404	cellular response to low-density lipoprotein particle stimulus	12	4	0.92	0.01029
50	GO:0048532	anatomical structure arrangement	12	4	0.92	0.01029
50	GO:0062099	negative regulation of programmed necrotic cell death	12	4	0.92	0.01029
50	GO:0060572	morphogenesis of an epithelial bud	12	4	0.92	0.01029
50	GO:1902430	negative regulation of amyloid-beta formation	12	4	0.92	0.01029
50	GO:2000353	positive regulation of endothelial cell apoptotic process	12	4	0.92	0.01029
50	GO:1902284	neuron projection extension involved in neuron projection guidance	12	4	0.92	0.01029
50	GO:0072010	glomerular epithelium development	12	4	0.92	0.01029
50	GO:0030099	myeloid cell differentiation	252	30	19.31	0.01031
50	GO:0030111	regulation of Wnt signaling pathway	190	24	14.56	0.01034
50	GO:0001568	blood vessel development	406	101	31.11	0.01039
50	GO:0051251	positive regulation of lymphocyte activation	160	21	12.26	0.01049
50	GO:0050866	negative regulation of cell activation	121	17	9.27	0.01062
50	GO:0007009	plasma membrane organization	66	11	5.06	0.01098
50	GO:0043281	regulation of cysteine-type endopeptidase activity involved in apoptotic process	103	15	7.89	0.01157
50	GO:0042060	wound healing	206	44	15.79	0.01178
50	GO:0010633	negative regulation of epithelial cell migration	43	14	3.3	0.01181
50	GO:0050679	positive regulation of epithelial cell proliferation	99	20	7.59	0.01193
50	GO:0071634	regulation of transforming growth factor beta production	26	6	1.99	0.01212
50	GO:0002683	negative regulation of immune system process	276	36	21.15	0.01212
50	GO:0050728	negative regulation of inflammatory response	85	13	6.51	0.01222
50	GO:1900048	positive regulation of hemostasis	19	5	1.46	0.01227
50	GO:0071402	cellular response to lipoprotein particle stimulus	19	5	1.46	0.01227
50	GO:1904646	cellular response to amyloid-beta	19	5	1.46	0.01227
50	GO:0034110	regulation of homotypic cell-cell adhesion	19	5	1.46	0.01227
50	GO:0030194	positive regulation of blood coagulation	19	5	1.46	0.01227
50	GO:0043542	endothelial cell migration	142	41	10.88	0.01236
50	GO:0016114	terpenoid biosynthetic process	7	3	0.54	0.01241
50	GO:0021561	facial nerve development	7	3	0.54	0.01241
50	GO:0021610	facial nerve morphogenesis	7	3	0.54	0.01241
50	GO:0021612	facial nerve structural organization	7	3	0.54	0.01241
50	GO:0003056	regulation of vascular smooth muscle contraction	7	3	0.54	0.01241
50	GO:0060353	regulation of cell adhesion molecule production	7	3	0.54	0.01241
50	GO:0048711	positive regulation of astrocyte differentiation	7	3	0.54	0.01241
50	GO:0060439	trachea morphogenesis	7	3	0.54	0.01241
50	GO:1904754	positive regulation of vascular associated smooth muscle cell migration	7	3	0.54	0.01241
50	GO:0071474	cellular hyperosmotic response	7	3	0.54	0.01241
50	GO:0006182	cGMP biosynthetic process	7	3	0.54	0.01241
50	GO:0031666	positive regulation of lipopolysaccharide-mediated signaling pathway	7	3	0.54	0.01241
50	GO:0035912	dorsal aorta morphogenesis	7	3	0.54	0.01241
50	GO:1901388	regulation of transforming growth factor beta activation	7	3	0.54	0.01241
50	GO:1903909	regulation of receptor clustering	7	3	0.54	0.01241
50	GO:2000727	positive regulation of cardiac muscle cell differentiation	7	3	0.54	0.01241
50	GO:0001767	establishment of lymphocyte polarity	7	3	0.54	0.01241
50	GO:0001768	establishment of T cell polarity	7	3	0.54	0.01241
50	GO:0018108	peptidyl-tyrosine phosphorylation	173	22	13.26	0.01273
50	GO:1903706	regulation of hemopoiesis	246	29	18.85	0.0131
50	GO:0035282	segmentation	59	10	4.52	0.01335
50	GO:0031623	receptor internalization	59	10	4.52	0.01335
50	GO:0035924	cellular response to vascular endothelial growth factor stimulus	42	13	3.22	0.01357
50	GO:0023014	signal transduction by protein phosphorylation	418	61	32.03	0.01364
50	GO:0000165	MAPK cascade	418	61	32.03	0.01364
50	GO:0002761	regulation of myeloid leukocyte differentiation	68	11	5.21	0.01365
50	GO:0051271	negative regulation of cellular component movement	176	39	13.49	0.01365
50	GO:2000351	regulation of endothelial cell apoptotic process	34	10	2.61	0.01371
50	GO:0033599	regulation of mammary gland epithelial cell proliferation	13	4	1	0.01398
50	GO:0031069	hair follicle morphogenesis	13	4	1	0.01398
50	GO:0003323	type B pancreatic cell development	13	4	1	0.01398
50	GO:0101023	vascular endothelial cell proliferation	13	4	1	0.01398
50	GO:0090026	positive regulation of monocyte chemotaxis	13	4	1	0.01398
50	GO:0051900	regulation of mitochondrial depolarization	13	4	1	0.01398
50	GO:0097150	neuronal stem cell population maintenance	13	4	1	0.01398
50	GO:1905209	positive regulation of cardiocyte differentiation	13	4	1	0.01398
50	GO:2000811	negative regulation of anoikis	13	4	1	0.01398
50	GO:1905562	regulation of vascular endothelial cell proliferation	13	4	1	0.01398
50	GO:0051149	positive regulation of muscle cell differentiation	37	10	2.84	0.01433
50	GO:1902105	regulation of leukocyte differentiation	175	22	13.41	0.01443
50	GO:0018212	peptidyl-tyrosine modification	175	22	13.41	0.01443
50	GO:0030866	cortical actin cytoskeleton organization	27	6	2.07	0.0146
50	GO:0060412	ventricular septum morphogenesis	27	6	2.07	0.0146
50	GO:0045747	positive regulation of Notch signaling pathway	27	6	2.07	0.0146
50	GO:0019882	antigen processing and presentation	53	13	4.06	0.01462
50	GO:0006955	immune response	711	77	54.48	0.01477
50	GO:1905477	positive regulation of protein localization to membrane	60	10	4.6	0.01496
50	GO:0008016	regulation of heart contraction	78	12	5.98	0.01504
50	GO:0050886	endocrine process	43	8	3.3	0.01507
50	GO:2000116	regulation of cysteine-type endopeptidase activity	116	16	8.89	0.01528
50	GO:2000406	positive regulation of T cell migration	20	5	1.53	0.01535
50	GO:0050820	positive regulation of coagulation	20	5	1.53	0.01535
50	GO:0045665	negative regulation of neuron differentiation	88	13	6.74	0.0161
50	GO:0072359	circulatory system development	591	124	45.29	0.01611
50	GO:0008593	regulation of Notch signaling pathway	52	9	3.98	0.01619
50	GO:0098773	skin epidermis development	52	9	3.98	0.01619
50	GO:0072073	kidney epithelium development	77	17	5.9	0.01644
50	GO:1903036	positive regulation of response to wounding	41	11	3.14	0.01644
50	GO:0045926	negative regulation of growth	117	16	8.97	0.01649
50	GO:0030855	epithelial cell differentiation	329	55	25.21	0.01685
50	GO:0060537	muscle tissue development	182	38	13.95	0.01697
50	GO:1903522	regulation of blood circulation	95	16	7.28	0.01715
50	GO:0008347	glial cell migration	28	6	2.15	0.01741
50	GO:0043330	response to exogenous dsRNA	28	6	2.15	0.01741
50	GO:0071604	transforming growth factor beta production	28	6	2.15	0.01741
50	GO:0048010	vascular endothelial growth factor receptor signaling pathway	28	6	2.15	0.01741
50	GO:0033173	calcineurin-NFAT signaling cascade	28	6	2.15	0.01741
50	GO:1903829	positive regulation of cellular protein localization	199	24	15.25	0.01759
50	GO:0010035	response to inorganic substance	199	24	15.25	0.01759
50	GO:0050727	regulation of inflammatory response	199	24	15.25	0.01759
50	GO:0043154	negative regulation of cysteine-type endopeptidase activity involved in apoptotic process	36	7	2.76	0.01777
50	GO:0070665	positive regulation of leukocyte proliferation	80	12	6.13	0.01815
50	GO:0045807	positive regulation of endocytosis	53	9	4.06	0.01822
50	GO:0140058	neuron projection arborization	14	4	1.07	0.01841
50	GO:0050982	detection of mechanical stimulus	14	4	1.07	0.01841
50	GO:0050926	regulation of positive chemotaxis	14	4	1.07	0.01841
50	GO:0048741	skeletal muscle fiber development	14	4	1.07	0.01841
50	GO:0060438	trachea development	14	4	1.07	0.01841
50	GO:0003181	atrioventricular valve morphogenesis	14	4	1.07	0.01841
50	GO:0060547	negative regulation of necrotic cell death	14	4	1.07	0.01841
50	GO:0045198	establishment of epithelial cell apical/basal polarity	14	4	1.07	0.01841
50	GO:0046697	decidualization	14	4	1.07	0.01841
50	GO:0045737	positive regulation of cyclin-dependent protein serine/threonine kinase activity	14	4	1.07	0.01841
50	GO:0032964	collagen biosynthetic process	20	9	1.53	0.01841
50	GO:0031345	negative regulation of cell projection organization	71	11	5.44	0.01852
50	GO:0038127	ERBB signaling pathway	71	11	5.44	0.01852
50	GO:0055003	cardiac myofibril assembly	8	3	0.61	0.01874
50	GO:1902946	protein localization to early endosome	8	3	0.61	0.01874
50	GO:2001028	positive regulation of endothelial cell chemotaxis	8	3	0.61	0.01874
50	GO:0016264	gap junction assembly	8	3	0.61	0.01874
50	GO:0021681	cerebellar granular layer development	8	3	0.61	0.01874
50	GO:0021604	cranial nerve structural organization	8	3	0.61	0.01874
50	GO:0048714	positive regulation of oligodendrocyte differentiation	8	3	0.61	0.01874
50	GO:0071696	ectodermal placode development	8	3	0.61	0.01874
50	GO:2000345	regulation of hepatocyte proliferation	8	3	0.61	0.01874
50	GO:0098712	L-glutamate import across plasma membrane	8	3	0.61	0.01874
50	GO:0034111	negative regulation of homotypic cell-cell adhesion	8	3	0.61	0.01874
50	GO:0051938	L-glutamate import	8	3	0.61	0.01874
50	GO:0070141	response to UV-A	8	3	0.61	0.01874
50	GO:1902548	negative regulation of cellular response to vascular endothelial growth factor stimulus	8	3	0.61	0.01874
50	GO:0072074	kidney mesenchyme development	8	3	0.61	0.01874
50	GO:0006953	acute-phase response	8	3	0.61	0.01874
50	GO:0090505	epiboly involved in wound healing	21	5	1.61	0.01891
50	GO:0033598	mammary gland epithelial cell proliferation	21	5	1.61	0.01891
50	GO:0044319	wound healing, spreading of cells	21	5	1.61	0.01891
50	GO:0043114	regulation of vascular permeability	21	5	1.61	0.01891
50	GO:1903707	negative regulation of hemopoiesis	90	13	6.9	0.01916
50	GO:0030900	forebrain development	175	24	13.41	0.01919
50	GO:0010721	negative regulation of cell development	129	17	9.89	0.01926
50	GO:0050670	regulation of lymphocyte proliferation	129	17	9.89	0.01926
50	GO:0060070	canonical Wnt signaling pathway	180	22	13.79	0.01946
50	GO:1901888	regulation of cell junction assembly	105	19	8.05	0.01989
50	GO:0007154	cell communication	3066	338	234.94	0.02004
50	GO:0050768	negative regulation of neurogenesis	110	15	8.43	0.02031
50	GO:0051592	response to calcium ion	54	9	4.14	0.02043
50	GO:0001503	ossification	213	43	16.32	0.02046
50	GO:0051148	negative regulation of muscle cell differentiation	37	7	2.84	0.02051
50	GO:0070252	actin-mediated cell contraction	37	7	2.84	0.02051
50	GO:0043406	positive regulation of MAP kinase activity	120	16	9.2	0.02056
50	GO:0055006	cardiac cell development	29	6	2.22	0.02057
50	GO:0030865	cortical cytoskeleton organization	29	6	2.22	0.02057
50	GO:0030521	androgen receptor signaling pathway	29	6	2.22	0.02057
50	GO:2000404	regulation of T cell migration	29	6	2.22	0.02057
50	GO:0042509	regulation of tyrosine phosphorylation of STAT protein	29	6	2.22	0.02057
50	GO:0045765	regulation of angiogenesis	184	48	14.1	0.02058
50	GO:0051606	detection of stimulus	63	10	4.83	0.02064
50	GO:0042326	negative regulation of phosphorylation	277	31	21.23	0.02091
50	GO:0030178	negative regulation of Wnt signaling pathway	101	14	7.74	0.02149
50	GO:0051249	regulation of lymphocyte activation	267	30	20.46	0.02173
50	GO:0051961	negative regulation of nervous system development	121	16	9.27	0.02207
50	GO:0090288	negative regulation of cellular response to growth factor stimulus	90	18	6.9	0.02208
50	GO:0032944	regulation of mononuclear cell proliferation	131	17	10.04	0.02209
50	GO:0002573	myeloid leukocyte differentiation	131	17	10.04	0.02209
50	GO:1901184	regulation of ERBB signaling pathway	46	8	3.52	0.02216
50	GO:0050671	positive regulation of lymphocyte proliferation	73	11	5.59	0.02242
50	GO:0060021	roof of mouth development	55	9	4.21	0.02283
50	GO:0030509	BMP signaling pathway	85	19	6.51	0.02292
50	GO:0090504	epiboly	22	5	1.69	0.02297
50	GO:0071353	cellular response to interleukin-4	22	5	1.69	0.02297
50	GO:0150076	neuroinflammatory response	22	5	1.69	0.02297
50	GO:1902230	negative regulation of intrinsic apoptotic signaling pathway in response to DNA damage	22	5	1.69	0.02297
50	GO:0097755	positive regulation of blood vessel diameter	22	5	1.69	0.02297
50	GO:0060828	regulation of canonical Wnt signaling pathway	152	19	11.65	0.02314
50	GO:0044788	modulation by host of viral process	22	8	1.69	0.02327
50	GO:0060411	cardiac septum morphogenesis	47	12	3.6	0.02347
50	GO:0032387	negative regulation of intracellular transport	38	7	2.91	0.02354
50	GO:0007189	adenylate cyclase-activating G protein-coupled receptor signaling pathway	38	7	2.91	0.02354
50	GO:0034308	primary alcohol metabolic process	38	7	2.91	0.02354
50	GO:0010324	membrane invagination	38	7	2.91	0.02354
50	GO:0050870	positive regulation of T cell activation	112	15	8.58	0.02355
50	GO:1901522	positive regulation of transcription from RNA polymerase II promoter involved in cellular response to chemical stimulus	15	4	1.15	0.02361
50	GO:0001516	prostaglandin biosynthetic process	15	4	1.15	0.02361
50	GO:0048713	regulation of oligodendrocyte differentiation	15	4	1.15	0.02361
50	GO:0048730	epidermis morphogenesis	15	4	1.15	0.02361
50	GO:0003171	atrioventricular valve development	15	4	1.15	0.02361
50	GO:0051882	mitochondrial depolarization	15	4	1.15	0.02361
50	GO:0046457	prostanoid biosynthetic process	15	4	1.15	0.02361
50	GO:0060571	morphogenesis of an epithelial fold	15	4	1.15	0.02361
50	GO:0071677	positive regulation of mononuclear cell migration	15	4	1.15	0.02361
50	GO:0060972	left/right pattern formation	15	4	1.15	0.02361
50	GO:0110150	negative regulation of biomineralization	15	4	1.15	0.02361
50	GO:0070168	negative regulation of biomineral tissue development	15	4	1.15	0.02361
50	GO:2000725	regulation of cardiac muscle cell differentiation	15	4	1.15	0.02361
50	GO:0010758	regulation of macrophage chemotaxis	15	4	1.15	0.02361
50	GO:0050730	regulation of peptidyl-tyrosine phosphorylation	132	17	10.11	0.02362
50	GO:0001659	temperature homeostasis	83	12	6.36	0.02369
50	GO:0098927	vesicle-mediated transport between endosomal compartments	30	6	2.3	0.0241
50	GO:0021885	forebrain cell migration	30	6	2.3	0.0241
50	GO:0048286	lung alveolus development	30	6	2.3	0.0241
50	GO:1902229	regulation of intrinsic apoptotic signaling pathway in response to DNA damage	30	6	2.3	0.0241
50	GO:0034113	heterotypic cell-cell adhesion	30	6	2.3	0.0241
50	GO:0097720	calcineurin-mediated signaling	30	6	2.3	0.0241
50	GO:0022409	positive regulation of cell-cell adhesion	145	22	11.11	0.02412
50	GO:0001822	kidney development	160	29	12.26	0.02442
50	GO:0032946	positive regulation of mononuclear cell proliferation	74	11	5.67	0.02458
50	GO:0030278	regulation of ossification	131	34	10.04	0.02494
50	GO:0072358	cardiovascular system development	429	104	32.87	0.02497
50	GO:0001944	vasculature development	429	104	32.87	0.02497
50	GO:0010977	negative regulation of neuron projection development	56	9	4.29	0.02542
50	GO:0046425	regulation of receptor signaling pathway via JAK-STAT	56	9	4.29	0.02542
50	GO:0090090	negative regulation of canonical Wnt signaling pathway	84	12	6.44	0.02579
50	GO:0010596	negative regulation of endothelial cell migration	33	12	2.53	0.0259
50	GO:0060317	cardiac epithelial to mesenchymal transition	19	8	1.46	0.02616
50	GO:0003013	circulatory system process	208	43	15.94	0.02639
50	GO:0021783	preganglionic parasympathetic fiber development	9	3	0.69	0.02654
50	GO:0010832	negative regulation of myotube differentiation	9	3	0.69	0.02654
50	GO:0036120	cellular response to platelet-derived growth factor stimulus	9	3	0.69	0.02654
50	GO:0060045	positive regulation of cardiac muscle cell proliferation	9	3	0.69	0.02654
50	GO:0010644	cell communication by electrical coupling	9	3	0.69	0.02654
50	GO:1905907	negative regulation of amyloid fibril formation	9	3	0.69	0.02654
50	GO:0106049	regulation of cellular response to osmotic stress	9	3	0.69	0.02654
50	GO:0071305	cellular response to vitamin D	9	3	0.69	0.02654
50	GO:0060433	bronchus development	9	3	0.69	0.02654
50	GO:0044793	negative regulation by host of viral process	9	3	0.69	0.02654
50	GO:0048548	regulation of pinocytosis	9	3	0.69	0.02654
50	GO:2001212	regulation of vasculogenesis	9	3	0.69	0.02654
50	GO:1900221	regulation of amyloid-beta clearance	9	3	0.69	0.02654
50	GO:0060707	trophoblast giant cell differentiation	9	3	0.69	0.02654
50	GO:0031269	pseudopodium assembly	9	3	0.69	0.02654
50	GO:0071801	regulation of podosome assembly	9	3	0.69	0.02654
50	GO:0071803	positive regulation of podosome assembly	9	3	0.69	0.02654
50	GO:0018158	protein oxidation	9	3	0.69	0.02654
50	GO:0034309	primary alcohol biosynthetic process	9	3	0.69	0.02654
50	GO:0035907	dorsal aorta development	9	3	0.69	0.02654
50	GO:0060973	cell migration involved in heart development	9	3	0.69	0.02654
50	GO:0006972	hyperosmotic response	9	3	0.69	0.02654
50	GO:1905523	positive regulation of macrophage migration	9	3	0.69	0.02654
50	GO:0036363	transforming growth factor beta activation	9	3	0.69	0.02654
50	GO:0010759	positive regulation of macrophage chemotaxis	9	3	0.69	0.02654
50	GO:0030593	neutrophil chemotaxis	39	7	2.99	0.02686
50	GO:0002066	columnar/cuboidal epithelial cell development	39	7	2.99	0.02686
50	GO:2000117	negative regulation of cysteine-type endopeptidase activity	39	7	2.99	0.02686
50	GO:0031333	negative regulation of protein-containing complex assembly	75	11	5.75	0.02689
50	GO:0022407	regulation of cell-cell adhesion	244	38	18.7	0.02698
50	GO:0048585	negative regulation of response to stimulus	960	115	73.56	0.02712
50	GO:0002062	chondrocyte differentiation	62	13	4.75	0.02729
50	GO:0007420	brain development	300	35	22.99	0.02731
50	GO:0030890	positive regulation of B cell proliferation	23	5	1.76	0.02755
50	GO:0060042	retina morphogenesis in camera-type eye	23	5	1.76	0.02755
50	GO:0051150	regulation of smooth muscle cell differentiation	23	5	1.76	0.02755
50	GO:0051281	positive regulation of release of sequestered calcium ion into cytosol	23	5	1.76	0.02755
50	GO:0060986	endocrine hormone secretion	23	5	1.76	0.02755
50	GO:1905207	regulation of cardiocyte differentiation	23	5	1.76	0.02755
50	GO:0022617	extracellular matrix disassembly	23	5	1.76	0.02755
50	GO:0010628	positive regulation of gene expression	1316	132	100.84	0.02764
50	GO:0007259	receptor signaling pathway via JAK-STAT	66	10	5.06	0.02775
50	GO:0001764	neuron migration	66	10	5.06	0.02775
50	GO:0048872	homeostasis of number of cells	197	23	15.1	0.02783
50	GO:0060688	regulation of morphogenesis of a branching structure	31	6	2.38	0.02801
50	GO:0048016	inositol phosphate-mediated signaling	31	6	2.38	0.02801
50	GO:0001942	hair follicle development	48	8	3.68	0.02804
50	GO:0051050	positive regulation of transport	431	51	33.03	0.0281
50	GO:0042476	odontogenesis	57	9	4.37	0.02821
50	GO:0007492	endoderm development	44	12	3.37	0.0289
50	GO:0072577	endothelial cell apoptotic process	37	10	2.84	0.02908
50	GO:0045860	positive regulation of protein kinase activity	248	37	19	0.02942
50	GO:0030859	polarized epithelial cell differentiation	16	4	1.23	0.02962
50	GO:0032331	negative regulation of chondrocyte differentiation	16	4	1.23	0.02962
50	GO:1903055	positive regulation of extracellular matrix organization	16	4	1.23	0.02962
50	GO:0050999	regulation of nitric-oxide synthase activity	16	4	1.23	0.02962
50	GO:0060390	regulation of SMAD protein signal transduction	16	4	1.23	0.02962
50	GO:0090050	positive regulation of cell migration involved in sprouting angiogenesis	16	4	1.23	0.02962
50	GO:0048729	tissue morphogenesis	350	58	26.82	0.03042
50	GO:0048640	negative regulation of developmental growth	40	7	3.07	0.03048
50	GO:0071230	cellular response to amino acid stimulus	40	7	3.07	0.03048
50	GO:0050817	coagulation	94	24	7.2	0.03055
50	GO:0090257	regulation of muscle system process	98	17	7.51	0.03084
50	GO:0045637	regulation of myeloid cell differentiation	126	16	9.66	0.03094
50	GO:0032147	activation of protein kinase activity	126	16	9.66	0.03094
50	GO:0010038	response to metal ion	116	15	8.89	0.03118
50	GO:0030100	regulation of endocytosis	106	14	8.12	0.03121
50	GO:1904892	regulation of receptor signaling pathway via STAT	58	9	4.44	0.03121
50	GO:0050819	negative regulation of coagulation	29	10	2.22	0.03124
50	GO:1990830	cellular response to leukemia inhibitory factor	77	11	5.9	0.03197
50	GO:1903038	negative regulation of leukocyte cell-cell adhesion	77	11	5.9	0.03197
50	GO:2000107	negative regulation of leukocyte apoptotic process	29	9	2.22	0.03211
50	GO:0007032	endosome organization	32	6	2.45	0.03232
50	GO:0007260	tyrosine phosphorylation of STAT protein	32	6	2.45	0.03232
50	GO:0002028	regulation of sodium ion transport	32	6	2.45	0.03232
50	GO:0046427	positive regulation of receptor signaling pathway via JAK-STAT	32	6	2.45	0.03232
50	GO:0099024	plasma membrane invagination	32	6	2.45	0.03232
50	GO:0070670	response to interleukin-4	24	5	1.84	0.03267
50	GO:0007193	adenylate cyclase-inhibiting G protein-coupled receptor signaling pathway	24	5	1.84	0.03267
50	GO:0046456	icosanoid biosynthetic process	24	5	1.84	0.03267
50	GO:0070098	chemokine-mediated signaling pathway	24	5	1.84	0.03267
50	GO:0006911	phagocytosis, engulfment	24	5	1.84	0.03267
50	GO:0009755	hormone-mediated signaling pathway	87	12	6.67	0.03289
50	GO:0023052	signaling	3029	333	232.11	0.03303
50	GO:0097696	receptor signaling pathway via STAT	68	10	5.21	0.03337
50	GO:0014706	striated muscle tissue development	169	34	12.95	0.03374
50	GO:0008015	blood circulation	190	40	14.56	0.03384
50	GO:0032970	regulation of actin filament-based process	217	35	16.63	0.03413
50	GO:0061061	muscle structure development	293	63	22.45	0.03418
50	GO:0072091	regulation of stem cell proliferation	41	7	3.14	0.03441
50	GO:1990823	response to leukemia inhibitory factor	78	11	5.98	0.03475
50	GO:0032880	regulation of protein localization	493	49	37.78	0.03488
50	GO:0060048	cardiac muscle contraction	50	8	3.83	0.0349
50	GO:0046849	bone remodeling	50	8	3.83	0.0349
50	GO:0008154	actin polymerization or depolymerization	128	16	9.81	0.03514
50	GO:0002064	epithelial cell development	129	25	9.89	0.03524
50	GO:0061383	trabecula morphogenesis	28	8	2.15	0.03536
50	GO:0048762	mesenchymal cell differentiation	133	33	10.19	0.03553
50	GO:1901701	cellular response to oxygen-containing compound	549	66	42.07	0.03558
50	GO:1903053	regulation of extracellular matrix organization	35	11	2.68	0.03562
50	GO:0055023	positive regulation of cardiac muscle tissue growth	10	3	0.77	0.03579
50	GO:0048486	parasympathetic nervous system development	10	3	0.77	0.03579
50	GO:0036119	response to platelet-derived growth factor	10	3	0.77	0.03579
50	GO:0072189	ureter development	10	3	0.77	0.03579
50	GO:0010613	positive regulation of cardiac muscle hypertrophy	10	3	0.77	0.03579
50	GO:0070986	left/right axis specification	10	3	0.77	0.03579
50	GO:0060391	positive regulation of SMAD protein signal transduction	10	3	0.77	0.03579
50	GO:0044406	adhesion of symbiont to host	10	3	0.77	0.03579
50	GO:0106030	neuron projection fasciculation	10	3	0.77	0.03579
50	GO:0007413	axonal fasciculation	10	3	0.77	0.03579
50	GO:0047484	regulation of response to osmotic stress	10	3	0.77	0.03579
50	GO:0046068	cGMP metabolic process	10	3	0.77	0.03579
50	GO:0032570	response to progesterone	10	3	0.77	0.03579
50	GO:0031268	pseudopodium organization	10	3	0.77	0.03579
50	GO:0043129	surfactant homeostasis	10	3	0.77	0.03579
50	GO:1905063	regulation of vascular smooth muscle cell differentiation	10	3	0.77	0.03579
50	GO:0051895	negative regulation of focal adhesion assembly	10	3	0.77	0.03579
50	GO:1905048	regulation of metallopeptidase activity	10	3	0.77	0.03579
50	GO:0150118	negative regulation of cell-substrate junction organization	10	3	0.77	0.03579
50	GO:0014742	positive regulation of muscle hypertrophy	10	3	0.77	0.03579
50	GO:0009651	response to salt stress	10	3	0.77	0.03579
50	GO:0070203	regulation of establishment of protein localization to telomere	10	3	0.77	0.03579
50	GO:2001234	negative regulation of apoptotic signaling pathway	149	18	11.42	0.03581
50	GO:0048644	muscle organ morphogenesis	40	10	3.07	0.03582
50	GO:0003197	endocardial cushion development	27	9	2.07	0.03582
50	GO:0032874	positive regulation of stress-activated MAPK cascade	98	13	7.51	0.03588
50	GO:0051155	positive regulation of striated muscle cell differentiation	27	8	2.07	0.03597
50	GO:0003309	type B pancreatic cell differentiation	17	4	1.3	0.03645
50	GO:0002068	glandular epithelial cell development	17	4	1.3	0.03645
50	GO:0060740	prostate gland epithelium morphogenesis	17	4	1.3	0.03645
50	GO:1903131	mononuclear cell differentiation	17	4	1.3	0.03645
50	GO:0006376	mRNA splice site selection	17	4	1.3	0.03645
50	GO:0051693	actin filament capping	17	4	1.3	0.03645
50	GO:0042311	vasodilation	17	4	1.3	0.03645
50	GO:0061037	negative regulation of cartilage development	17	4	1.3	0.03645
50	GO:0009593	detection of chemical stimulus	17	4	1.3	0.03645
50	GO:1902624	positive regulation of neutrophil migration	17	4	1.3	0.03645
50	GO:0030224	monocyte differentiation	17	4	1.3	0.03645
50	GO:1904037	positive regulation of epithelial cell apoptotic process	17	4	1.3	0.03645
50	GO:0060322	head development	329	41	25.21	0.03667
50	GO:0061337	cardiac conduction	33	6	2.53	0.03703
50	GO:0030183	B cell differentiation	79	11	6.05	0.03769
50	GO:0001892	embryonic placenta development	60	9	4.6	0.03786
50	GO:0050896	response to stimulus	4383	457	335.86	0.0379
50	GO:0042177	negative regulation of protein catabolic process	89	12	6.82	0.03834
50	GO:0001933	negative regulation of protein phosphorylation	247	27	18.93	0.03834
50	GO:0033144	negative regulation of intracellular steroid hormone receptor signaling pathway	25	5	1.92	0.03835
50	GO:0032768	regulation of monooxygenase activity	25	5	1.92	0.03835
50	GO:0048546	digestive tract morphogenesis	25	5	1.92	0.03835
50	GO:0006692	prostanoid metabolic process	25	5	1.92	0.03835
50	GO:0006693	prostaglandin metabolic process	25	5	1.92	0.03835
50	GO:0048008	platelet-derived growth factor receptor signaling pathway	42	7	3.22	0.03867
50	GO:0022404	molting cycle process	51	8	3.91	0.03873
50	GO:0022405	hair cycle process	51	8	3.91	0.03873
50	GO:0044706	multi-multicellular organism process	75	13	5.75	0.03897
50	GO:2001243	negative regulation of intrinsic apoptotic signaling pathway	70	10	5.36	0.03974
50	GO:0072089	stem cell proliferation	70	10	5.36	0.03974
50	GO:0006941	striated muscle contraction	70	10	5.36	0.03974
50	GO:0045834	positive regulation of lipid metabolic process	78	14	5.98	0.04047
50	GO:0007165	signal transduction	2820	315	216.09	0.0406
50	GO:0030155	regulation of cell adhesion	433	86	33.18	0.04068
50	GO:0003158	endothelium development	75	27	5.75	0.04087
50	GO:0010648	negative regulation of cell communication	775	92	59.39	0.04115
50	GO:0071396	cellular response to lipid	262	39	20.08	0.04121
50	GO:0050803	regulation of synapse structure or activity	90	12	6.9	0.04129
50	GO:0050807	regulation of synapse organization	90	12	6.9	0.04129
50	GO:0043112	receptor metabolic process	100	13	7.66	0.04132
50	GO:0042129	regulation of T cell proliferation	100	13	7.66	0.04132
50	GO:0070304	positive regulation of stress-activated protein kinase signaling cascade	100	13	7.66	0.04132
50	GO:0016358	dendrite development	100	13	7.66	0.04132
50	GO:0009968	negative regulation of signal transduction	740	89	56.71	0.04146
50	GO:0040007	growth	445	59	34.1	0.04152
50	GO:0050954	sensory perception of mechanical stimulus	61	9	4.67	0.04153
50	GO:0000187	activation of MAPK activity	61	9	4.67	0.04153
50	GO:2001237	negative regulation of extrinsic apoptotic signaling pathway	61	9	4.67	0.04153
50	GO:1904894	positive regulation of receptor signaling pathway via STAT	34	6	2.61	0.04216
50	GO:0043331	response to dsRNA	34	6	2.61	0.04216
50	GO:2000736	regulation of stem cell differentiation	34	6	2.61	0.04216
50	GO:0048705	skeletal system morphogenesis	131	16	10.04	0.04219
50	GO:0030282	bone mineralization	67	13	5.13	0.04221
50	GO:0003281	ventricular septum development	43	7	3.3	0.04326
50	GO:0014068	positive regulation of phosphatidylinositol 3-kinase signaling	43	7	3.3	0.04326
50	GO:0046889	positive regulation of lipid biosynthetic process	43	7	3.3	0.04326
50	GO:0021955	central nervous system neuron axonogenesis	23	7	1.76	0.04365
50	GO:1901889	negative regulation of cell junction assembly	18	4	1.38	0.04411
50	GO:0048596	embryonic camera-type eye morphogenesis	18	4	1.38	0.04411
50	GO:0003209	cardiac atrium morphogenesis	18	4	1.38	0.04411
50	GO:0060512	prostate gland morphogenesis	18	4	1.38	0.04411
50	GO:0002313	mature B cell differentiation involved in immune response	18	4	1.38	0.04411
50	GO:1902742	apoptotic process involved in development	18	4	1.38	0.04411
50	GO:0090184	positive regulation of kidney development	18	4	1.38	0.04411
50	GO:0036003	positive regulation of transcription from RNA polymerase II promoter in response to stress	18	4	1.38	0.04411
50	GO:1905475	regulation of protein localization to membrane	101	13	7.74	0.04425
50	GO:0050731	positive regulation of peptidyl-tyrosine phosphorylation	91	12	6.97	0.04439
50	GO:0070527	platelet aggregation	26	5	1.99	0.0446
50	GO:0030850	prostate gland development	26	5	1.99	0.0446
50	GO:0031076	embryonic camera-type eye development	26	5	1.99	0.0446
50	GO:0120163	negative regulation of cold-induced thermogenesis	26	5	1.99	0.0446
50	GO:0035850	epithelial cell differentiation involved in kidney development	26	5	1.99	0.0446
50	GO:0097028	dendritic cell differentiation	26	5	1.99	0.0446
50	GO:0098739	import across plasma membrane	68	12	5.21	0.04464
50	GO:0043547	positive regulation of GTPase activity	132	16	10.11	0.04475
50	GO:0048738	cardiac muscle tissue development	90	20	6.9	0.04483
50	GO:0071495	cellular response to endogenous stimulus	652	107	49.96	0.04527
50	GO:0023057	negative regulation of signaling	778	92	59.62	0.04536
50	GO:0010715	regulation of extracellular matrix disassembly	11	3	0.84	0.04648
50	GO:2000641	regulation of early endosome to late endosome transport	11	3	0.84	0.04648
50	GO:0045655	regulation of monocyte differentiation	11	3	0.84	0.04648
50	GO:0010544	negative regulation of platelet activation	11	3	0.84	0.04648
50	GO:0051016	barbed-end actin filament capping	11	3	0.84	0.04648
50	GO:1905906	regulation of amyloid fibril formation	11	3	0.84	0.04648
50	GO:0033690	positive regulation of osteoblast proliferation	11	3	0.84	0.04648
50	GO:0050974	detection of mechanical stimulus involved in sensory perception	11	3	0.84	0.04648
50	GO:0033631	cell-cell adhesion mediated by integrin	11	3	0.84	0.04648
50	GO:0060343	trabecula formation	11	3	0.84	0.04648
50	GO:1900119	positive regulation of execution phase of apoptosis	11	3	0.84	0.04648
50	GO:0035728	response to hepatocyte growth factor	11	3	0.84	0.04648
50	GO:0035729	cellular response to hepatocyte growth factor stimulus	11	3	0.84	0.04648
50	GO:0002026	regulation of the force of heart contraction	11	3	0.84	0.04648
50	GO:0003222	ventricular trabecula myocardium morphogenesis	11	3	0.84	0.04648
50	GO:0060546	negative regulation of necroptotic process	11	3	0.84	0.04648
50	GO:0090036	regulation of protein kinase C signaling	11	3	0.84	0.04648
50	GO:0061042	vascular wound healing	11	3	0.84	0.04648
50	GO:0042481	regulation of odontogenesis	11	3	0.84	0.04648
50	GO:0061323	cell proliferation involved in heart morphogenesis	11	3	0.84	0.04648
50	GO:2000136	regulation of cell proliferation involved in heart morphogenesis	11	3	0.84	0.04648
50	GO:2000251	positive regulation of actin cytoskeleton reorganization	11	3	0.84	0.04648
50	GO:0090189	regulation of branching involved in ureteric bud morphogenesis	11	3	0.84	0.04648
50	GO:0002577	regulation of antigen processing and presentation	11	3	0.84	0.04648
50	GO:0014741	negative regulation of muscle hypertrophy	11	3	0.84	0.04648
50	GO:0070202	regulation of establishment of protein localization to chromosome	11	3	0.84	0.04648
50	GO:0014031	mesenchymal cell development	40	9	3.07	0.04707
50	GO:2000106	regulation of leukocyte apoptotic process	49	11	3.75	0.04719
50	GO:0043254	regulation of protein-containing complex assembly	252	27	19.31	0.04733
50	GO:1903037	regulation of leukocyte cell-cell adhesion	181	26	13.87	0.04749
50	GO:0055088	lipid homeostasis	82	11	6.28	0.04757
50	GO:0010771	negative regulation of cell morphogenesis involved in differentiation	35	6	2.68	0.04772
50	GO:1901655	cellular response to ketone	35	6	2.68	0.04772
50	GO:1904427	positive regulation of calcium ion transmembrane transport	35	6	2.68	0.04772
50	GO:0043405	regulation of MAP kinase activity	165	19	12.64	0.04804
50	GO:0046651	lymphocyte proliferation	165	19	12.64	0.04804
50	GO:2000177	regulation of neural precursor cell proliferation	44	7	3.37	0.04819
50	GO:0006690	icosanoid metabolic process	44	7	3.37	0.04819
50	GO:0050764	regulation of phagocytosis	44	7	3.37	0.04819
50	GO:0048589	developmental growth	312	47	23.91	0.04827
50	GO:0042098	T cell proliferation	123	15	9.43	0.04863
50	GO:0050818	regulation of coagulation	55	16	4.21	0.04898
50	GO:0045661	regulation of myoblast differentiation	32	13	2.45	0.04913
50	GO:0042176	regulation of protein catabolic process	253	27	19.39	0.04929
50	GO:0010975	regulation of neuron projection development	198	22	15.17	0.04945
50	GO:0030239	myofibril assembly	20	7	1.53	0.04973
50	GO:0044794	positive regulation by host of viral process	12	6	0.92	0.04978
