# Supplementary material for: Porcine intestinal innate lymphoid cells and lymphocyte spatial context revealed through single-cell RNA sequencing
Source: bioRxiv preprint, doi:10.1101/2022.01.09.475571, version 1 (2022-01-11)
Supplement: Wiarda_SupplementaryData09 [file 475571_file04.xlsx]

## Sheet: File_key
Supplementary Data 9. Differential gene expression and biological process enrichment results in porcine ileal B/ASCs.
Sheet name	Sheet description
annot_DGE	Results from differential gene expression analysis between annotated cell types
GO_results	Biological processes enriched in annotated cell types

## Sheet: annot_DGE
gene	p_val	avg_logFC	pct.1	pct.2	p_val_adj	cluster
AQP3	0	0.797385	0.492	0.01	0	Antibody-secreting cells
CCR10	0	1.02699	0.549	0.008	0	Antibody-secreting cells
CCR2	0	0.306596	0.194	0.002	0	Antibody-secreting cells
CFD	0	1.18844	0.583	0.037	0	Antibody-secreting cells
CRELD2	0	1.18274	0.668	0.06	0	Antibody-secreting cells
CST3	0	0.788166	0.639	0.102	0	Antibody-secreting cells
DNAJB9	0	1.16165	0.837	0.119	0	Antibody-secreting cells
DNAJC3	0	0.874861	0.643	0.049	0	Antibody-secreting cells
ENSSSCG00000000849	0	1.79875	0.953	0.244	0	Antibody-secreting cells
ENSSSCG00000010044	0	1.29499	0.558	0.019	0	Antibody-secreting cells
ENSSSCG00000021006	0	0.369675	0.214	0.002	0	Antibody-secreting cells
ENSSSCG00000031037	0	0.929141	0.268	0.015	0	Antibody-secreting cells
ENSSSCG00000032582	0	1.42514	0.386	0.023	0	Antibody-secreting cells
ENSSSCG00000034072	0	2.13447	0.984	0.341	0	Antibody-secreting cells
ENSSSCG00000034766	0	1.40215	0.431	0.007	0	Antibody-secreting cells
ENSSSCG00000039740	0	-1.27327	0.995	1	0	Antibody-secreting cells
ENSSSCG00000039854	0	0.472155	0.352	0.003	0	Antibody-secreting cells
ENSSSCG00000040381	0	0.72672	0.248	0.006	0	Antibody-secreting cells
ENSSSCG00000040440	0	0.497225	0.144	0.001	0	Antibody-secreting cells
ENTPD1	0	0.423159	0.339	0.02	0	Antibody-secreting cells
FKBP11	0	2.14335	0.982	0.161	0	Antibody-secreting cells
HM13	0	0.966671	0.763	0.12	0	Antibody-secreting cells
IFI6	0	1.65332	0.916	0.26	0	Antibody-secreting cells
IGSF8	0	0.620725	0.492	0.059	0	Antibody-secreting cells
ISG20	0	0.754041	0.503	0.036	0	Antibody-secreting cells
ITGB7	0	0.873754	0.715	0.13	0	Antibody-secreting cells
JCHAIN	0	5.49875	0.989	0.526	0	Antibody-secreting cells
LGALS3BP	0	0.892271	0.646	0.082	0	Antibody-secreting cells
LMAN1	0	1.37598	0.862	0.13	0	Antibody-secreting cells
MZB1	0	2.11617	0.995	0.581	0	Antibody-secreting cells
PDIA5	0	0.381776	0.28	0.009	0	Antibody-secreting cells
PLAAT3	0	0.949291	0.691	0.025	0	Antibody-secreting cells
PRDM1	0	0.523025	0.431	0.039	0	Antibody-secreting cells
PRDX4	0	2.06649	0.969	0.18	0	Antibody-secreting cells
RGS18	0	0.863955	0.637	0.026	0	Antibody-secreting cells
RPS20	0	-1.49051	0.98	1	0	Antibody-secreting cells
RRBP1	0	1.02177	0.718	0.099	0	Antibody-secreting cells
SDC1	0	0.357964	0.251	0.006	0	Antibody-secreting cells
SDF2L1	0	1.46562	0.811	0.124	0	Antibody-secreting cells
SEC11C	0	2.01773	0.975	0.242	0	Antibody-secreting cells
SELENOS	0	1.05753	0.865	0.16	0	Antibody-secreting cells
SERPINE2	0	0.36086	0.233	0.006	0	Antibody-secreting cells
SLC17A9	0	0.454184	0.368	0.023	0	Antibody-secreting cells
SSR3	0	1.23113	0.937	0.279	0	Antibody-secreting cells
TENT5C	0	1.04062	0.844	0.164	0	Antibody-secreting cells
TNFRSF13B	0	0.711701	0.54	0.067	0	Antibody-secreting cells
TNFRSF17	0	0.965633	0.528	0.004	0	Antibody-secreting cells
TNFSF10	0	0.735859	0.578	0.07	0	Antibody-secreting cells
TPST2	0	0.706926	0.601	0.071	0	Antibody-secreting cells
TSPAN13	0	0.42675	0.327	0.016	0	Antibody-secreting cells
TXNDC5	0	1.52759	0.887	0.046	0	Antibody-secreting cells
XBP1	0	1.38266	0.962	0.231	0	Antibody-secreting cells
RPS26	5.05197e-308	-1.39953	0.943	1	7.96241e-304	Antibody-secreting cells
RPS16	6.99127e-308	-1.1956	0.982	1	1.10189e-303	Antibody-secreting cells
ENSSSCG00000037214	3.70582e-304	1.46585	0.53	0.076	5.84075e-300	Antibody-secreting cells
ENSSSCG00000004489	1.36894e-303	-1.238	0.996	1	2.15758e-299	Antibody-secreting cells
RPL37	7.41693e-300	-1.25967	0.966	1	1.16898e-295	Antibody-secreting cells
ENSSSCG00000037141	2.76113e-299	5.9337	0.833	0.248	4.35181e-295	Antibody-secreting cells
SSR4	3.91956e-297	1.56724	0.989	0.617	6.17762e-293	Antibody-secreting cells
ENSSSCG00000014850	6.38375e-297	1.23452	0.961	0.34	1.00614e-292	Antibody-secreting cells
ENSSSCG00000035768	4.83817e-292	-1.18726	0.982	1	7.62545e-288	Antibody-secreting cells
RPL26	6.05814e-290	-1.22877	0.969	0.999	9.54824e-286	Antibody-secreting cells
RPS27	1.91695e-288	-1.07188	0.989	1	3.02131e-284	Antibody-secreting cells
SIL1	6.0333e-288	0.352378	0.32	0.026	9.50909e-284	Antibody-secreting cells
ENSSSCG00000013889	1.60948e-286	-1.21806	0.978	1	2.5367e-282	Antibody-secreting cells
TMEM38B	4.5645e-285	0.489052	0.375	0.037	7.1941e-281	Antibody-secreting cells
CD63	1.6115e-284	0.909516	0.781	0.173	2.53988e-280	Antibody-secreting cells
ENSSSCG00000035080	9.15112e-284	-1.18795	0.968	1	1.44231e-279	Antibody-secreting cells
ENSSSCG00000037030	9.0701e-281	-1.24766	0.969	0.998	1.42954e-276	Antibody-secreting cells
SEC61A1	7.96181e-280	0.79718	0.731	0.149	1.25486e-275	Antibody-secreting cells
ENSSSCG00000031088	1.11737e-279	-1.18087	0.977	1	1.76109e-275	Antibody-secreting cells
RPS17	9.29108e-277	-1.18424	0.964	1	1.46437e-272	Antibody-secreting cells
RPL34	1.01655e-276	-1.19611	0.968	0.999	1.60219e-272	Antibody-secreting cells
BHLHA15	6.16898e-276	0.3389	0.275	0.019	9.72293e-272	Antibody-secreting cells
ENSSSCG00000011798	3.37105e-275	1.1097	0.804	0.211	5.31312e-271	Antibody-secreting cells
RPL39	3.56876e-275	-1.14643	0.962	0.999	5.62473e-271	Antibody-secreting cells
RPS5	5.87093e-275	-1.26233	0.946	0.998	9.25317e-271	Antibody-secreting cells
FICD	6.91885e-274	0.432388	0.357	0.035	1.09048e-269	Antibody-secreting cells
ENSSSCG00000033757	9.94982e-274	0.963189	0.831	0.214	1.56819e-269	Antibody-secreting cells
ENSSSCG00000039490	1.55958e-273	1.0494	0.458	0.06	2.45805e-269	Antibody-secreting cells
DUSP5	3.60302e-272	1.25498	0.788	0.193	5.67872e-268	Antibody-secreting cells
ENSSSCG00000017239	6.57045e-271	-1.21058	0.941	0.998	1.03557e-266	Antibody-secreting cells
ENSSSCG00000003930	9.96981e-270	-1.03723	0.987	1	1.57134e-265	Antibody-secreting cells
ENSSSCG00000014855	1.77362e-269	-1.06972	0.986	1	2.7954e-265	Antibody-secreting cells
SARAF	5.38826e-269	0.689649	0.709	0.138	8.49243e-265	Antibody-secreting cells
RPS3A	1.88483e-267	-1.14498	0.968	0.999	2.97068e-263	Antibody-secreting cells
RPL6	8.98838e-266	-1.14838	0.959	0.999	1.41666e-261	Antibody-secreting cells
ENSSSCG00000034448	7.23059e-265	-1.07871	0.986	1	1.13961e-260	Antibody-secreting cells
RPLP0	1.17185e-264	-1.07755	0.982	1	1.84696e-260	Antibody-secreting cells
ENSSSCG00000035811	1.17717e-264	-1.05652	0.98	1	1.85534e-260	Antibody-secreting cells
RPL9	1.07011e-262	-1.12626	0.955	0.999	1.6866e-258	Antibody-secreting cells
RPL11	6.10504e-260	-1.08974	0.962	0.999	9.62215e-256	Antibody-secreting cells
ENSSSCG00000014569	1.42855e-258	-1.06503	0.982	1	2.25154e-254	Antibody-secreting cells
RPN1	5.13315e-258	0.980014	0.865	0.244	8.09036e-254	Antibody-secreting cells
ENSSSCG00000003042	5.56235e-258	-0.918554	1	1	8.76683e-254	Antibody-secreting cells
ENSSSCG00000036296	6.84569e-257	-1.02092	0.982	1	1.07895e-252	Antibody-secreting cells
RPS11	8.60026e-255	-0.994844	0.989	1	1.35549e-250	Antibody-secreting cells
ENSSSCG00000040273	1.2425e-254	-1.03243	0.975	0.999	1.9583e-250	Antibody-secreting cells
PIGK	3.22095e-254	0.383231	0.368	0.04	5.07654e-250	Antibody-secreting cells
ENSSSCG00000008170	1.13628e-253	-1.1366	0.952	0.996	1.7909e-249	Antibody-secreting cells
ENSSSCG00000029830	1.09033e-252	-1.02476	0.978	1	1.71847e-248	Antibody-secreting cells
RPS6	2.92211e-252	-1.04458	0.987	0.999	4.60554e-248	Antibody-secreting cells
RPL35	4.86975e-252	-0.99097	0.987	0.999	7.67522e-248	Antibody-secreting cells
SPCS1	6.78081e-251	1.25748	0.998	0.697	1.06872e-246	Antibody-secreting cells
ENSSSCG00000039460	4.47483e-249	-1.10428	0.977	0.999	7.05278e-245	Antibody-secreting cells
RPL17-C18orf32	1.76153e-246	-1.07021	0.966	0.999	2.77634e-242	Antibody-secreting cells
SRGN	1.14395e-245	0.779215	0.732	0.165	1.80298e-241	Antibody-secreting cells
ENSSSCG00000020830	1.15783e-244	-1.20278	0.907	0.993	1.82486e-240	Antibody-secreting cells
CORO1A	5.02814e-244	-1.53745	0.668	0.956	7.92485e-240	Antibody-secreting cells
RPS23	8.67532e-244	-1.12022	0.941	0.999	1.36732e-239	Antibody-secreting cells
OAZ1	1.12846e-242	-1.08967	0.973	0.992	1.77857e-238	Antibody-secreting cells
RACK1	9.94901e-242	-1.24506	0.842	0.983	1.56806e-237	Antibody-secreting cells
KXD1	5.54052e-241	-0.997063	0.971	0.999	8.73241e-237	Antibody-secreting cells
BTF3	6.15333e-241	-1.2947	0.829	0.966	9.69826e-237	Antibody-secreting cells
PDIA4	1.88618e-240	1.3313	0.961	0.464	2.97282e-236	Antibody-secreting cells
TMSB10	1.15241e-239	-1.23534	0.952	1	1.81631e-235	Antibody-secreting cells
RPS13	8.28847e-239	-1.05142	0.948	0.995	1.30635e-234	Antibody-secreting cells
CFL1	3.57664e-237	-1.36383	0.833	0.962	5.63714e-233	Antibody-secreting cells
ENSSSCG00000034617	1.65054e-236	-0.937439	0.982	1	2.60141e-232	Antibody-secreting cells
RPS12	2.95268e-235	-1.01043	0.982	1	4.65372e-231	Antibody-secreting cells
ENSSSCG00000024974	7.89648e-234	-1.05915	0.953	0.996	1.24456e-229	Antibody-secreting cells
ENSSSCG00000025928	9.07296e-234	-0.987195	0.957	0.997	1.42999e-229	Antibody-secreting cells
RPL22	1.57575e-233	-1.15935	0.921	0.988	2.48354e-229	Antibody-secreting cells
HSD11B1L	7.48216e-230	-1.00363	0.977	0.998	1.17926e-225	Antibody-secreting cells
ENSSSCG00000016737	1.11053e-228	-1.2969	0.894	0.988	1.7503e-224	Antibody-secreting cells
SPCS3	6.07471e-228	1.146	0.961	0.459	9.57435e-224	Antibody-secreting cells
RPS9	2.58027e-227	-0.93634	0.975	0.999	4.06676e-223	Antibody-secreting cells
ENSSSCG00000004970	2.74449e-227	-0.824216	0.996	1	4.32559e-223	Antibody-secreting cells
ENSSSCG00000017509	5.03534e-226	-0.984669	0.969	0.997	7.9362e-222	Antibody-secreting cells
ENSSSCG00000038507	9.58275e-223	-0.900927	0.98	0.999	1.51034e-218	Antibody-secreting cells
ENSSSCG00000039544	1.90695e-222	-0.983868	0.939	0.999	3.00555e-218	Antibody-secreting cells
IMPDH1	1.57804e-220	0.389274	0.368	0.046	2.48715e-216	Antibody-secreting cells
GINM1	1.59568e-220	0.475935	0.487	0.079	2.51494e-216	Antibody-secreting cells
RPL7	3.40595e-220	-0.948321	0.982	0.998	5.36811e-216	Antibody-secreting cells
ENSSSCG00000039046	4.20908e-220	-1.19041	0.86	0.981	6.63393e-216	Antibody-secreting cells
AVPI1	6.96044e-219	0.30731	0.291	0.029	1.09703e-214	Antibody-secreting cells
FNDC3A	6.25303e-218	0.4072	0.382	0.05	9.85541e-214	Antibody-secreting cells
RPS4X	1.13128e-216	-1.01152	0.957	0.997	1.78302e-212	Antibody-secreting cells
NUPR1	1.14523e-216	1.44356	0.609	0.145	1.805e-212	Antibody-secreting cells
RPS14	8.32277e-216	-0.994025	0.957	0.992	1.31175e-211	Antibody-secreting cells
B2M	1.30037e-215	1.20652	1	0.937	2.04951e-211	Antibody-secreting cells
NAP1L1	2.01947e-215	-1.45379	0.648	0.914	3.18289e-211	Antibody-secreting cells
RPL27	1.81865e-214	-1.08236	0.89	0.977	2.86637e-210	Antibody-secreting cells
ENSSSCG00000012916	2.87962e-213	-1.79062	0.472	0.875	4.53857e-209	Antibody-secreting cells
ACTG1	4.14509e-211	-1.3537	0.679	0.966	6.53308e-207	Antibody-secreting cells
TPM3	1.83199e-209	-1.46225	0.549	0.893	2.88739e-205	Antibody-secreting cells
RPN2	5.65877e-209	0.73881	0.697	0.172	8.91878e-205	Antibody-secreting cells
RPLP2	9.34241e-209	-0.875322	0.975	0.997	1.47246e-204	Antibody-secreting cells
H3F3A	2.15675e-207	-0.958623	0.991	0.995	3.39925e-203	Antibody-secreting cells
ENSSSCG00000011272	4.84039e-206	-0.904117	0.975	0.999	7.62894e-202	Antibody-secreting cells
ENSSSCG00000011952	2.32826e-204	-1.0304	0.925	0.988	3.66958e-200	Antibody-secreting cells
RABAC1	2.28149e-203	1.01872	0.914	0.364	3.59586e-199	Antibody-secreting cells
ENSSSCG00000009145	8.23525e-203	0.967423	0.896	0.342	1.29796e-198	Antibody-secreting cells
ENSSSCG00000009303	1.00554e-202	-0.875258	0.957	0.997	1.58483e-198	Antibody-secreting cells
NAAA	9.60007e-202	0.347346	0.332	0.04	1.51307e-197	Antibody-secreting cells
SRPRA	2.75697e-201	0.64714	0.697	0.169	4.34526e-197	Antibody-secreting cells
COX6C	4.22886e-201	-0.964901	0.925	0.978	6.66511e-197	Antibody-secreting cells
EGFL8	6.65078e-201	0.361029	0.368	0.049	1.04823e-196	Antibody-secreting cells
TPT1	8.8309e-201	-0.78291	0.993	1	1.39184e-196	Antibody-secreting cells
SSR1	2.62633e-200	0.903241	0.826	0.267	4.13935e-196	Antibody-secreting cells
ENSSSCG00000036716	4.64109e-200	-0.896841	0.964	0.998	7.31482e-196	Antibody-secreting cells
ENSSSCG00000037081	9.29462e-200	-1.28723	0.68	0.907	1.46493e-195	Antibody-secreting cells
SEC61B	1.11405e-199	1.02634	0.989	0.742	1.75585e-195	Antibody-secreting cells
RPS18	1.15741e-199	-0.922454	0.98	0.999	1.8242e-195	Antibody-secreting cells
ENSSSCG00000013597	1.82327e-199	-0.979105	0.941	0.99	2.87365e-195	Antibody-secreting cells
SLC25A6	2.56942e-199	-1.16521	0.849	0.96	4.04966e-195	Antibody-secreting cells
ENSSSCG00000033909	4.56341e-198	0.995181	0.926	0.341	7.19239e-194	Antibody-secreting cells
YWHAB	3.39652e-197	-1.47321	0.53	0.875	5.35325e-193	Antibody-secreting cells
CNPY2	1.07406e-195	0.66226	0.628	0.146	1.69283e-191	Antibody-secreting cells
ARPC2	4.98263e-195	-1.17963	0.776	0.936	7.85313e-191	Antibody-secreting cells
CD79B	1.66109e-193	-1.53186	0.731	0.898	2.61804e-189	Antibody-secreting cells
ENSSSCG00000027573	1.75775e-193	-0.884732	0.957	0.993	2.7704e-189	Antibody-secreting cells
DDOST	1.40673e-192	0.950655	0.855	0.305	2.21715e-188	Antibody-secreting cells
HMGN2	2.2272e-192	-1.93509	0.655	0.907	3.51028e-188	Antibody-secreting cells
KRTCAP2	4.55086e-192	0.915365	0.944	0.427	7.17261e-188	Antibody-secreting cells
ENSSSCG00000033733	4.8676e-192	-1.46432	0.754	0.908	7.67182e-188	Antibody-secreting cells
PTMA	1.11712e-191	-0.97708	0.996	0.999	1.76069e-187	Antibody-secreting cells
ERLEC1	2.04081e-191	0.699106	0.747	0.203	3.21652e-187	Antibody-secreting cells
HSPE1	5.25172e-191	-1.36492	0.724	0.926	8.27723e-187	Antibody-secreting cells
PLOD3	1.68016e-190	0.38439	0.343	0.046	2.64811e-186	Antibody-secreting cells
ENSSSCG00000009327	2.13905e-190	-1.67779	0.828	0.94	3.37136e-186	Antibody-secreting cells
ENSSSCG00000036350	3.03118e-190	-1.18151	0.883	0.951	4.77744e-186	Antibody-secreting cells
SUMO2	8.5084e-190	-1.20298	0.799	0.918	1.34101e-185	Antibody-secreting cells
TMA7	1.29974e-188	-1.13729	0.785	0.926	2.04852e-184	Antibody-secreting cells
ACTB	7.4276e-187	-1.35683	0.74	0.966	1.17066e-182	Antibody-secreting cells
LAPTM5	5.36425e-183	-1.71895	0.255	0.805	8.4546e-179	Antibody-secreting cells
RPSA	1.12286e-182	-0.945093	0.952	0.993	1.76975e-178	Antibody-secreting cells
PPIB	2.87068e-179	1.21051	0.961	0.55	4.52448e-175	Antibody-secreting cells
EEF1B2	9.72617e-179	-0.99242	0.899	0.965	1.53294e-174	Antibody-secreting cells
ENSSSCG00000009772	1.79436e-176	0.926712	0.928	0.425	2.82809e-172	Antibody-secreting cells
P4HB	1.18561e-175	0.532175	0.485	0.098	1.86863e-171	Antibody-secreting cells
KDELR2	2.59246e-175	0.600301	0.641	0.162	4.08597e-171	Antibody-secreting cells
ENSSSCG00000008898	7.96593e-175	0.340421	0.291	0.036	1.25551e-170	Antibody-secreting cells
ELL2	4.7071e-173	0.441819	0.391	0.064	7.41886e-169	Antibody-secreting cells
ENSSSCG00000033500	7.20886e-172	-1.02813	0.797	0.927	1.13619e-167	Antibody-secreting cells
ENSSSCG00000007743	1.38704e-171	-1.02977	0.846	0.924	2.18611e-167	Antibody-secreting cells
HERPUD1	7.22189e-171	1.02239	0.948	0.455	1.13824e-166	Antibody-secreting cells
RPL7A	8.91059e-171	-0.78172	0.984	0.997	1.4044e-166	Antibody-secreting cells
ZNF70	1.88874e-170	-1.64731	0.384	0.838	2.97685e-166	Antibody-secreting cells
ENSSSCG00000006081	7.60105e-170	-0.910878	0.871	0.966	1.198e-165	Antibody-secreting cells
RPS10-NUDT3	1.35487e-169	-0.845918	0.939	0.978	2.13541e-165	Antibody-secreting cells
EDEM1	4.23318e-169	0.424889	0.443	0.083	6.67192e-165	Antibody-secreting cells
TMEM123	5.22197e-169	-1.43394	0.46	0.831	8.23034e-165	Antibody-secreting cells
MS4A1	1.11193e-168	-1.71573	0.25	0.786	1.75251e-164	Antibody-secreting cells
TPST1	1.48167e-167	0.531357	0.6	0.142	2.33527e-163	Antibody-secreting cells
RPS15	1.79296e-167	-0.673646	0.993	1	2.82589e-163	Antibody-secreting cells
ENSSSCG00000033019	2.65169e-167	-0.897356	0.907	0.976	4.17933e-163	Antibody-secreting cells
ENSSSCG00000005656	2.69798e-167	-1.21066	0.623	0.875	4.25228e-163	Antibody-secreting cells
LIMD2	1.08533e-166	-1.42586	0.309	0.791	1.71059e-162	Antibody-secreting cells
ENSSSCG00000010203	7.70176e-166	-1.12319	0.725	0.894	1.21387e-161	Antibody-secreting cells
ERP44	2.70078e-165	0.685626	0.671	0.187	4.2567e-161	Antibody-secreting cells
CD74	5.92122e-165	-1.34199	0.952	0.981	9.33243e-161	Antibody-secreting cells
HYOU1	7.7936e-165	0.483238	0.467	0.095	1.22835e-160	Antibody-secreting cells
TXNDC11	2.54178e-162	0.309483	0.345	0.052	4.0061e-158	Antibody-secreting cells
SLC50A1	1.60547e-160	0.292955	0.294	0.04	2.53038e-156	Antibody-secreting cells
KDELR1	8.09418e-160	0.711409	0.811	0.283	1.27572e-155	Antibody-secreting cells
ARPC3	8.31972e-160	-1.03272	0.806	0.907	1.31127e-155	Antibody-secreting cells
HSP90AB1	2.8282e-159	-1.2047	0.713	0.898	4.45752e-155	Antibody-secreting cells
ID3	1.48476e-158	-1.69168	0.144	0.71	2.34012e-154	Antibody-secreting cells
SEC24A	1.89428e-158	0.30166	0.276	0.036	2.98557e-154	Antibody-secreting cells
SSR2	7.30448e-157	0.937144	0.991	0.789	1.15126e-152	Antibody-secreting cells
MANF	1.25662e-156	0.992729	0.91	0.438	1.98056e-152	Antibody-secreting cells
SLAMF7	3.16989e-156	0.524717	0.58	0.142	4.99607e-152	Antibody-secreting cells
VAMP8	3.82472e-156	-1.30737	0.596	0.834	6.02815e-152	Antibody-secreting cells
ITM2B	7.8101e-156	0.477429	0.718	0.202	1.23095e-151	Antibody-secreting cells
GAPDH	1.33295e-155	-1.19241	0.747	0.909	2.10086e-151	Antibody-secreting cells
ENSSSCG00000013064	1.42615e-154	-0.865652	0.89	0.954	2.24775e-150	Antibody-secreting cells
RPL10	1.49765e-154	-0.704044	0.993	1	2.36044e-150	Antibody-secreting cells
EDEM2	3.897e-154	0.406024	0.443	0.088	6.14206e-150	Antibody-secreting cells
TCEA1	4.08253e-154	-1.69591	0.557	0.816	6.43448e-150	Antibody-secreting cells
DERL1	1.01085e-153	0.643766	0.734	0.231	1.59319e-149	Antibody-secreting cells
ATOX1	1.28207e-153	0.921894	0.925	0.449	2.02067e-149	Antibody-secreting cells
ENSSSCG00000015434	4.026e-153	-1.55654	0.104	0.684	6.34538e-149	Antibody-secreting cells
CALU	2.51087e-151	0.265364	0.287	0.04	3.95739e-147	Antibody-secreting cells
IRF4	4.13965e-151	0.361435	0.343	0.056	6.52451e-147	Antibody-secreting cells
COX1	2.51928e-150	-0.755536	0.977	0.973	3.97064e-146	Antibody-secreting cells
COX3	2.84258e-150	-0.703065	0.989	0.976	4.48019e-146	Antibody-secreting cells
PTPRCAP	2.79118e-149	-1.01172	0.84	0.909	4.39918e-145	Antibody-secreting cells
IL6R	4.6806e-149	0.316278	0.305	0.045	7.37709e-145	Antibody-secreting cells
SLC35B1	2.3685e-148	0.534472	0.589	0.155	3.733e-144	Antibody-secreting cells
SERBP1	3.18854e-147	-1.13151	0.594	0.837	5.02546e-143	Antibody-secreting cells
EIF3K	1.81916e-146	-0.935847	0.82	0.914	2.86718e-142	Antibody-secreting cells
ENSSSCG00000012961	3.05444e-146	-0.993409	0.794	0.895	4.81411e-142	Antibody-secreting cells
UAP1	7.93092e-146	0.317524	0.305	0.047	1.24999e-141	Antibody-secreting cells
S100A10	5.68839e-145	0.510845	0.346	0.06	8.96547e-141	Antibody-secreting cells
HMGB2	1.23422e-144	-2.02585	0.506	0.817	1.94525e-140	Antibody-secreting cells
LY86	3.78707e-141	-1.46486	0.102	0.66	5.9688e-137	Antibody-secreting cells
ENSSSCG00000027689	3.98724e-140	0.540874	0.519	0.128	6.28429e-136	Antibody-secreting cells
PYCR1	2.39037e-139	0.311501	0.33	0.057	3.76747e-135	Antibody-secreting cells
PTPRC	8.78212e-139	-1.19523	0.566	0.824	1.38415e-134	Antibody-secreting cells
ENSSSCG00000008433	3.72723e-138	-1.16006	0.756	0.88	5.87449e-134	Antibody-secreting cells
SOD1	2.09625e-136	-1.27332	0.637	0.816	3.3039e-132	Antibody-secreting cells
ENSSSCG00000004945	4.08794e-136	-0.783692	0.898	0.957	6.44301e-132	Antibody-secreting cells
ENSSSCG00000001075	3.10302e-135	-1.54534	0.101	0.64	4.89068e-131	Antibody-secreting cells
RPL23	3.19706e-135	-0.683246	0.977	0.999	5.03888e-131	Antibody-secreting cells
ATP6	3.28252e-133	-0.629377	0.996	0.975	5.17358e-129	Antibody-secreting cells
ENSSSCG00000037009	5.46308e-133	4.54036	0.732	0.313	8.61036e-129	Antibody-secreting cells
NPM1	6.90601e-132	-1.01333	0.756	0.885	1.08846e-127	Antibody-secreting cells
TUBA1B	2.00117e-131	-1.40891	0.803	0.88	3.15404e-127	Antibody-secreting cells
HSPA13	2.63624e-131	0.438745	0.467	0.11	4.15497e-127	Antibody-secreting cells
SURF4	5.93282e-131	0.430438	0.503	0.125	9.35071e-127	Antibody-secreting cells
HNRNPK	2.10698e-128	-0.981879	0.691	0.847	3.32082e-124	Antibody-secreting cells
ELL3	5.10338e-128	-1.48767	0.101	0.624	8.04344e-124	Antibody-secreting cells
AGA	1.20441e-127	0.315031	0.354	0.067	1.89826e-123	Antibody-secreting cells
TRAM1	1.2314e-127	0.686842	0.914	0.421	1.94081e-123	Antibody-secreting cells
H2AFV	2.22129e-127	-1.28641	0.682	0.827	3.50098e-123	Antibody-secreting cells
STT3A	9.53944e-127	0.490771	0.528	0.143	1.50351e-122	Antibody-secreting cells
HYPK	1.08148e-126	-1.08915	0.594	0.807	1.70452e-122	Antibody-secreting cells
LCP1	1.6024e-126	-1.20736	0.445	0.773	2.52554e-122	Antibody-secreting cells
RAN	6.01578e-126	-1.113	0.691	0.845	9.48147e-122	Antibody-secreting cells
ENSSSCG00000015710	5.92308e-125	-1.15764	0.508	0.778	9.33536e-121	Antibody-secreting cells
RAC2	8.43049e-125	-0.786291	0.934	0.944	1.32873e-120	Antibody-secreting cells
ARPC1B	8.5382e-124	-0.996051	0.786	0.865	1.34571e-119	Antibody-secreting cells
H2AFZ	1.19889e-123	-1.43712	0.74	0.853	1.88957e-119	Antibody-secreting cells
ENSSSCG00000003914	2.00354e-123	-1.0164	0.614	0.837	3.15778e-119	Antibody-secreting cells
EIF3H	2.91875e-123	-1.11009	0.442	0.759	4.60024e-119	Antibody-secreting cells
SDF4	5.36314e-122	0.490363	0.706	0.229	8.45284e-118	Antibody-secreting cells
RPS21	1.57237e-121	-0.653148	0.957	0.982	2.47821e-117	Antibody-secreting cells
ENSSSCG00000039830	5.66994e-121	0.322778	0.332	0.063	8.93639e-117	Antibody-secreting cells
HLA-DRA	5.68572e-121	-1.32584	0.747	0.896	8.96126e-117	Antibody-secreting cells
NOP10	2.11144e-120	-0.877696	0.808	0.876	3.32784e-116	Antibody-secreting cells
COX7B	3.78442e-120	-0.934638	0.811	0.89	5.96463e-116	Antibody-secreting cells
CHID1	4.15823e-120	0.404028	0.524	0.139	6.55379e-116	Antibody-secreting cells
RPL5	8.94613e-120	-0.750524	0.935	0.951	1.41e-115	Antibody-secreting cells
PFN1	1.0129e-119	-1.163	0.512	0.785	1.59643e-115	Antibody-secreting cells
LTB	1.19509e-119	-1.45269	0.321	0.719	1.88359e-115	Antibody-secreting cells
ITM2C	3.02905e-119	0.358553	0.415	0.094	4.77409e-115	Antibody-secreting cells
RPL3	4.22257e-119	-0.728497	0.941	0.965	6.65519e-115	Antibody-secreting cells
AICDA	8.25255e-119	-1.74622	0.065	0.587	1.30068e-114	Antibody-secreting cells
MIF	1.45403e-118	-0.884252	0.817	0.881	2.2917e-114	Antibody-secreting cells
CYTB	2.09421e-118	-0.715709	0.977	0.962	3.30068e-114	Antibody-secreting cells
ARPC5L	2.71105e-118	-1.04912	0.654	0.822	4.27289e-114	Antibody-secreting cells
OGFOD3	1.4398e-116	0.260488	0.278	0.048	2.26927e-112	Antibody-secreting cells
ATP5F1E	3.46384e-116	-0.653578	0.944	0.965	5.45937e-112	Antibody-secreting cells
GRAMD2B	8.1256e-116	0.276392	0.336	0.066	1.28068e-111	Antibody-secreting cells
ENSSSCG00000000071	1.1491e-115	-0.947646	0.706	0.835	1.8111e-111	Antibody-secreting cells
ATP5PB	2.0414e-115	-1.02238	0.741	0.847	3.21745e-111	Antibody-secreting cells
CD37	2.56142e-115	-1.28353	0.248	0.672	4.03705e-111	Antibody-secreting cells
ENSSSCG00000028485	6.38246e-115	-0.939886	0.779	0.882	1.00594e-110	Antibody-secreting cells
COX4I1	6.33696e-114	-0.731086	0.882	0.917	9.98769e-110	Antibody-secreting cells
SMC6	2.07749e-113	-1.45105	0.19	0.637	3.27432e-109	Antibody-secreting cells
ENSSSCG00000036983	3.2252e-113	2.59845	0.153	0.015	5.08323e-109	Antibody-secreting cells
COX2	7.19026e-113	-0.582789	0.991	0.977	1.13326e-108	Antibody-secreting cells
ENSSSCG00000033697	2.7751e-112	-0.658839	0.948	0.983	4.37384e-108	Antibody-secreting cells
ND4	4.30676e-112	-0.622465	0.968	0.968	6.78788e-108	Antibody-secreting cells
SLA-DMA	1.88951e-110	-1.35752	0.253	0.653	2.97805e-106	Antibody-secreting cells
SLC1A5	5.14199e-110	0.363576	0.397	0.094	8.1043e-106	Antibody-secreting cells
CCPG1	8.2118e-110	0.432084	0.671	0.223	1.29426e-105	Antibody-secreting cells
ENSSSCG00000038719	3.83959e-109	3.66653	0.846	0.665	6.05158e-105	Antibody-secreting cells
HINT1	5.16706e-108	-0.831613	0.806	0.873	8.14381e-104	Antibody-secreting cells
SRSF10	1.00376e-107	-1.23781	0.39	0.704	1.58203e-103	Antibody-secreting cells
RCN2	1.37259e-106	0.25115	0.303	0.059	2.16333e-102	Antibody-secreting cells
HMCES	2.22076e-106	-1.49779	0.359	0.678	3.50014e-102	Antibody-secreting cells
EMP3	2.60443e-106	0.379815	0.56	0.164	4.10484e-102	Antibody-secreting cells
ERP29	3.79682e-105	0.642928	0.74	0.299	5.98416e-101	Antibody-secreting cells
ENSSSCG00000033721	5.96461e-105	-1.35967	0.197	0.632	9.40082e-101	Antibody-secreting cells
SNRPE	2.94238e-104	-0.962206	0.668	0.8	4.63748e-100	Antibody-secreting cells
GABARAP	1.90564e-102	-0.729755	0.914	0.9	3.00347e-98	Antibody-secreting cells
LMAN2	2.54532e-102	0.529711	0.682	0.251	4.01168e-98	Antibody-secreting cells
CXCR4	4.58349e-102	-1.32329	0.386	0.713	7.22404e-98	Antibody-secreting cells
DUT	7.16291e-102	-1.60126	0.522	0.735	1.12895e-97	Antibody-secreting cells
UCP2	6.09511e-101	-1.28782	0.366	0.674	9.60651e-97	Antibody-secreting cells
ARFGAP3	2.25074e-100	0.347701	0.438	0.116	3.5474e-96	Antibody-secreting cells
CD99	4.14496e-100	0.439777	0.637	0.213	6.53287e-96	Antibody-secreting cells
TMED9	5.17566e-100	0.614257	0.849	0.407	8.15736e-96	Antibody-secreting cells
HSPA8	9.04779e-100	-0.903285	0.846	0.912	1.42602e-95	Antibody-secreting cells
MYDGF	1.10664e-99	0.460349	0.636	0.218	1.74417e-95	Antibody-secreting cells
ENSSSCG00000003520	1.76302e-99	-0.922844	0.618	0.783	2.77869e-95	Antibody-secreting cells
GOLM1	7.14275e-99	0.333077	0.454	0.122	1.12577e-94	Antibody-secreting cells
HNRNPC	1.98775e-98	-0.958575	0.609	0.758	3.1329e-94	Antibody-secreting cells
ENSSSCG00000009673	1.50594e-97	-1.394	0.07	0.528	2.37352e-93	Antibody-secreting cells
ND5	3.85177e-97	-0.876549	0.731	0.832	6.07077e-93	Antibody-secreting cells
UBE2D3	2.31039e-96	-0.821569	0.725	0.826	3.64141e-92	Antibody-secreting cells
ENSSSCG00000022058	1.13563e-94	0.27841	0.44	0.118	1.78987e-90	Antibody-secreting cells
ENSSSCG00000036761	2.02137e-94	0.277579	0.253	0.047	3.18588e-90	Antibody-secreting cells
RBM38	2.59187e-94	-1.15561	0.158	0.571	4.08505e-90	Antibody-secreting cells
ENSSSCG00000001229	2.63315e-94	0.469498	1	0.882	4.15011e-90	Antibody-secreting cells
STMN1	3.31101e-94	-1.52735	0.612	0.76	5.21849e-90	Antibody-secreting cells
ENSSSCG00000034211	9.06943e-94	-1.22101	0.059	0.51	1.42943e-89	Antibody-secreting cells
ENSSSCG00000024776	1.81301e-93	-1.01261	0.546	0.745	2.85749e-89	Antibody-secreting cells
CCND3	2.38505e-93	-1.19234	0.145	0.561	3.75908e-89	Antibody-secreting cells
TMEM59	3.76744e-93	0.457952	0.785	0.318	5.93786e-89	Antibody-secreting cells
TPI1	1.17958e-92	-0.92738	0.63	0.778	1.85913e-88	Antibody-secreting cells
COX8A	3.48236e-92	-0.714506	0.887	0.888	5.48854e-88	Antibody-secreting cells
ENSSSCG00000014672	7.6983e-92	-1.20364	0.111	0.536	1.21333e-87	Antibody-secreting cells
ENSSSCG00000039111	1.05833e-91	4.60427	0.553	0.232	1.66804e-87	Antibody-secreting cells
TMED7	4.06037e-91	0.339097	0.515	0.159	6.39955e-87	Antibody-secreting cells
RFC1	6.61039e-91	-1.26127	0.228	0.598	1.04186e-86	Antibody-secreting cells
HSPA5	6.88687e-91	0.836763	0.986	0.782	1.08544e-86	Antibody-secreting cells
DNMT1	2.96288e-90	-1.28211	0.171	0.566	4.66979e-86	Antibody-secreting cells
ENSSSCG00000006360	4.97747e-90	0.367465	0.544	0.172	7.84499e-86	Antibody-secreting cells
COX17	6.33771e-90	-0.842955	0.74	0.825	9.98886e-86	Antibody-secreting cells
CD247	2.12637e-89	-1.31018	0.185	0.578	3.35138e-85	Antibody-secreting cells
ENSSSCG00000003691	3.51291e-89	-0.799665	0.731	0.816	5.53669e-85	Antibody-secreting cells
FUS	9.21165e-89	-1.11766	0.268	0.609	1.45185e-84	Antibody-secreting cells
MYL6	2.35911e-88	-0.835606	0.729	0.829	3.7182e-84	Antibody-secreting cells
EIF1	2.35987e-88	-0.520675	0.998	0.995	3.71939e-84	Antibody-secreting cells
HNRNPDL	6.3424e-88	-0.827917	0.729	0.816	9.99625e-84	Antibody-secreting cells
CD44	9.19141e-88	0.277834	0.318	0.073	1.44866e-83	Antibody-secreting cells
ARHGDIB	1.18573e-87	-0.772055	0.783	0.867	1.86883e-83	Antibody-secreting cells
SRPRB	2.00584e-86	0.32626	0.424	0.12	3.16141e-82	Antibody-secreting cells
EEF2	1.69263e-85	-0.676343	0.855	0.88	2.66775e-81	Antibody-secreting cells
PSIP1	1.04194e-84	-1.03459	0.395	0.66	1.64221e-80	Antibody-secreting cells
CD38	1.10782e-84	0.297567	0.39	0.105	1.74604e-80	Antibody-secreting cells
CTSZ	1.34557e-84	0.464907	0.632	0.24	2.12076e-80	Antibody-secreting cells
DBI	6.96698e-84	-0.885244	0.497	0.736	1.09807e-79	Antibody-secreting cells
NUCKS1	1.13587e-83	-1.25749	0.402	0.663	1.79024e-79	Antibody-secreting cells
ZFP36L1	2.08656e-83	-1.09765	0.248	0.603	3.28863e-79	Antibody-secreting cells
ENSSSCG00000035224	4.74764e-83	-1.13691	0.165	0.545	7.48275e-79	Antibody-secreting cells
COX7C	7.60223e-83	-0.67433	0.833	0.86	1.19819e-78	Antibody-secreting cells
SAR1B	1.73288e-82	0.372313	0.605	0.218	2.73119e-78	Antibody-secreting cells
CCT3	2.06513e-82	-1.03228	0.264	0.599	3.25486e-78	Antibody-secreting cells
PPP1CC	2.37991e-82	-0.99833	0.355	0.636	3.75098e-78	Antibody-secreting cells
PAIP2	4.0022e-82	-0.911535	0.614	0.745	6.30786e-78	Antibody-secreting cells
NANS	2.25916e-81	-1.05955	0.54	0.71	3.56066e-77	Antibody-secreting cells
ENSSSCG00000000657	2.52305e-81	0.293634	0.648	0.231	3.97658e-77	Antibody-secreting cells
ST6GALNAC4	5.61574e-81	0.516861	0.871	0.434	8.85096e-77	Antibody-secreting cells
SERP1	5.96898e-81	0.621412	0.953	0.617	9.4077e-77	Antibody-secreting cells
DAD1	1.69712e-80	0.560793	0.903	0.512	2.67484e-76	Antibody-secreting cells
ENSSSCG00000002790	1.73221e-80	0.364776	0.623	0.232	2.73013e-76	Antibody-secreting cells
HNRNPM	4.61793e-80	-0.910513	0.485	0.694	7.27832e-76	Antibody-secreting cells
ENSSSCG00000016711	5.35579e-80	-1.06364	0.3	0.598	8.44127e-76	Antibody-secreting cells
SNRPD1	1.05138e-79	-0.990929	0.449	0.674	1.65707e-75	Antibody-secreting cells
ENSSSCG00000032073	1.1976e-79	0.315305	0.415	0.123	1.88754e-75	Antibody-secreting cells
CCT2	3.60657e-79	-0.978201	0.357	0.64	5.68432e-75	Antibody-secreting cells
ENSSSCG00000030197	5.67422e-78	-1.11421	0.054	0.455	8.94314e-74	Antibody-secreting cells
SEC61G	6.63793e-78	0.654682	0.932	0.588	1.0462e-73	Antibody-secreting cells
ENSSSCG00000040857	1.10738e-77	-0.866147	0.512	0.708	1.74534e-73	Antibody-secreting cells
GCSAM	1.63347e-77	-1.14241	0.156	0.521	2.57451e-73	Antibody-secreting cells
RTRAF	1.13091e-76	-0.821921	0.625	0.747	1.78243e-72	Antibody-secreting cells
PLP2	5.04101e-76	0.44981	0.698	0.298	7.94514e-72	Antibody-secreting cells
HDLBP	8.67138e-76	0.347935	0.562	0.203	1.3667e-71	Antibody-secreting cells
ENSSSCG00000030775	9.13962e-76	1.05736	0.133	0.018	1.4405e-71	Antibody-secreting cells
ENSSSCG00000039071	1.34516e-75	-0.846186	0.494	0.706	2.12011e-71	Antibody-secreting cells
TYMS	1.44848e-75	-1.08666	0.189	0.538	2.28295e-71	Antibody-secreting cells
PEA15	1.55857e-75	-1.07125	0.237	0.568	2.45647e-71	Antibody-secreting cells
TMED10	2.8455e-75	0.383016	0.677	0.272	4.48479e-71	Antibody-secreting cells
SRSF2	1.11247e-74	-0.886595	0.591	0.729	1.75336e-70	Antibody-secreting cells
ATP5F1A	4.59138e-74	-0.741251	0.671	0.783	7.23648e-70	Antibody-secreting cells
SON	4.7427e-74	-0.812842	0.607	0.747	7.47498e-70	Antibody-secreting cells
ERH	1.71777e-73	-0.86576	0.544	0.712	2.70738e-69	Antibody-secreting cells
PRDX2	5.17413e-73	-1.0531	0.311	0.595	8.15495e-69	Antibody-secreting cells
ACTR2	1.71649e-72	-0.958225	0.334	0.608	2.70536e-68	Antibody-secreting cells
SLA-DMB	2.62195e-72	-1.10959	0.151	0.51	4.13245e-68	Antibody-secreting cells
PLAC8	5.55383e-72	-1.37786	0.181	0.523	8.75339e-68	Antibody-secreting cells
COX5B	1.33806e-71	-0.690116	0.767	0.817	2.10892e-67	Antibody-secreting cells
SEC62	2.80477e-71	0.375973	0.715	0.306	4.42059e-67	Antibody-secreting cells
ENSSSCG00000039731	4.9447e-71	0.289699	0.425	0.135	7.79334e-67	Antibody-secreting cells
ENO1	5.91644e-71	-0.87094	0.585	0.734	9.3249e-67	Antibody-secreting cells
POP7	8.9015e-71	-0.983684	0.162	0.505	1.40297e-66	Antibody-secreting cells
EEF1D	9.84972e-71	-0.719291	0.668	0.769	1.55241e-66	Antibody-secreting cells
GNB2	1.14934e-70	-0.89686	0.472	0.66	1.81148e-66	Antibody-secreting cells
ND2	9.35292e-70	-0.573161	0.966	0.952	1.47411e-65	Antibody-secreting cells
ATP5MC2	1.33003e-69	-0.748748	0.657	0.755	2.09626e-65	Antibody-secreting cells
DDX5	1.40452e-69	-0.587281	0.926	0.926	2.21367e-65	Antibody-secreting cells
PIK3AP1	3.32774e-69	-0.976255	0.097	0.462	5.24485e-65	Antibody-secreting cells
LAPTM4A	4.17704e-69	0.265127	0.614	0.232	6.58343e-65	Antibody-secreting cells
ENSSSCG00000000905	5.21168e-69	-0.850024	0.445	0.659	8.21412e-65	Antibody-secreting cells
ENSSSCG00000014565	6.52362e-69	0.453117	0.944	0.621	1.02819e-64	Antibody-secreting cells
POLE4	1.65027e-68	-0.945336	0.601	0.694	2.60099e-64	Antibody-secreting cells
COMMD4	3.32e-68	-1.11154	0.338	0.6	5.23265e-64	Antibody-secreting cells
ARPC5	3.52716e-68	-0.918139	0.463	0.662	5.55916e-64	Antibody-secreting cells
ARF6	1.29725e-67	-0.723289	0.707	0.771	2.0446e-63	Antibody-secreting cells
KARS	3.22308e-67	-0.840949	0.431	0.64	5.0799e-63	Antibody-secreting cells
FCRLA	5.99102e-67	-1.03726	0.077	0.437	9.44245e-63	Antibody-secreting cells
CSK	8.58596e-67	-0.901219	0.39	0.618	1.35323e-62	Antibody-secreting cells
ACOT13	1.15508e-66	-1.06704	0.325	0.593	1.82052e-62	Antibody-secreting cells
ARPC4	1.73588e-66	-0.90204	0.46	0.654	2.73592e-62	Antibody-secreting cells
ENSSSCG00000034698	2.80873e-66	0.403872	0.293	0.079	4.42684e-62	Antibody-secreting cells
ND1	3.04308e-66	-0.605733	0.916	0.906	4.7962e-62	Antibody-secreting cells
REEP5	3.87397e-66	0.313686	0.589	0.231	6.10577e-62	Antibody-secreting cells
UBL3	5.51287e-66	-0.995132	0.271	0.561	8.68883e-62	Antibody-secreting cells
ENSSSCG00000015337	6.46209e-66	-0.716433	0.718	0.783	1.01849e-61	Antibody-secreting cells
ITGA4	1.11172e-65	0.27067	0.431	0.141	1.75217e-61	Antibody-secreting cells
ZFAND2A	2.01632e-65	0.253352	0.192	0.039	3.17791e-61	Antibody-secreting cells
GPX1	2.34349e-65	0.324632	0.882	0.493	3.69358e-61	Antibody-secreting cells
EIF4A1	3.64878e-65	-0.792758	0.573	0.728	5.75084e-61	Antibody-secreting cells
REXO2	4.48078e-65	0.255194	0.339	0.101	7.06216e-61	Antibody-secreting cells
ENSSSCG00000007355	1.09818e-64	-0.761676	0.639	0.747	1.73084e-60	Antibody-secreting cells
ENSSSCG00000013315	2.51103e-64	-0.813328	0.522	0.677	3.95764e-60	Antibody-secreting cells
MAGT1	4.11592e-64	0.251266	0.474	0.166	6.4871e-60	Antibody-secreting cells
EVL	5.21569e-64	-0.990327	0.323	0.577	8.22044e-60	Antibody-secreting cells
SNRPF	8.49047e-64	-0.878567	0.368	0.605	1.33818e-59	Antibody-secreting cells
BET1	1.75433e-63	0.289412	0.494	0.182	2.76499e-59	Antibody-secreting cells
EIF3E	2.97152e-63	-0.873051	0.386	0.604	4.68341e-59	Antibody-secreting cells
DNAJA1	3.16165e-63	-0.845775	0.621	0.735	4.98307e-59	Antibody-secreting cells
USP1	4.99863e-63	-1.00173	0.338	0.575	7.87834e-59	Antibody-secreting cells
ENSSSCG00000000405	2.87305e-62	-0.656946	0.724	0.787	4.52821e-58	Antibody-secreting cells
MGST1	4.96596e-62	-0.914923	0.422	0.632	7.82686e-58	Antibody-secreting cells
CAPZB	1.2541e-61	-0.83884	0.417	0.62	1.97658e-57	Antibody-secreting cells
HNRNPU	3.12407e-61	-0.858616	0.456	0.635	4.92385e-57	Antibody-secreting cells
SWAP70	3.67773e-61	-0.940096	0.117	0.446	5.79647e-57	Antibody-secreting cells
CD19	5.21501e-61	-0.970611	0.16	0.475	8.21938e-57	Antibody-secreting cells
LRMP	1.33398e-60	-1.12106	0.221	0.506	2.10248e-56	Antibody-secreting cells
SSB	5.32137e-60	-0.754473	0.605	0.71	8.38701e-56	Antibody-secreting cells
TRA2B	1.35548e-59	-0.802743	0.569	0.68	2.13637e-55	Antibody-secreting cells
CD53	6.93906e-59	-0.800031	0.614	0.717	1.09366e-54	Antibody-secreting cells
SFT2D1	2.97676e-58	-0.829834	0.345	0.588	4.69167e-54	Antibody-secreting cells
ATP5MC3	3.22245e-58	-0.839422	0.395	0.615	5.07891e-54	Antibody-secreting cells
ENSSSCG00000016990	3.32177e-58	0.454153	0.874	0.49	5.23544e-54	Antibody-secreting cells
SKP1	4.20931e-58	-0.799365	0.456	0.631	6.63429e-54	Antibody-secreting cells
PDIA3	5.05979e-58	0.324306	0.587	0.246	7.97474e-54	Antibody-secreting cells
ENSSSCG00000013366	5.77993e-58	-0.847612	0.521	0.662	9.10974e-54	Antibody-secreting cells
HIKESHI	5.94538e-58	-0.856888	0.364	0.582	9.37052e-54	Antibody-secreting cells
SMIM14	9.806e-58	-0.911832	0.083	0.405	1.54552e-53	Antibody-secreting cells
ILF2	1.1085e-57	-0.859944	0.316	0.557	1.74711e-53	Antibody-secreting cells
ABLIM1	2.48883e-57	-0.863203	0.057	0.385	3.92264e-53	Antibody-secreting cells
FAM49B	6.06629e-57	-0.854188	0.219	0.504	9.56108e-53	Antibody-secreting cells
SRSF7	1.69169e-56	-0.909133	0.425	0.606	2.66628e-52	Antibody-secreting cells
SEPT11	3.54481e-56	0.304824	0.478	0.182	5.58697e-52	Antibody-secreting cells
CHRAC1	3.7917e-56	-0.850629	0.384	0.588	5.97609e-52	Antibody-secreting cells
ENSSSCG00000013052	4.87226e-55	0.274455	0.627	0.265	7.67917e-51	Antibody-secreting cells
COX6A1	6.95737e-55	-0.580896	0.842	0.807	1.09655e-50	Antibody-secreting cells
PAX5	9.52368e-55	-0.840151	0.034	0.352	1.50103e-50	Antibody-secreting cells
SF3B6	1.49617e-54	-0.739815	0.537	0.663	2.35812e-50	Antibody-secreting cells
ENSSSCG00000034527	3.651e-54	-0.833032	0.472	0.62	5.75434e-50	Antibody-secreting cells
COX7A2L	5.6284e-54	-0.691078	0.65	0.714	8.87092e-50	Antibody-secreting cells
RBM8A	6.79847e-54	-0.752527	0.537	0.656	1.07151e-49	Antibody-secreting cells
GDI2	9.97932e-54	-0.815432	0.284	0.529	1.57284e-49	Antibody-secreting cells
ENSSSCG00000040379	1.05498e-53	-0.862452	0.21	0.513	1.66275e-49	Antibody-secreting cells
SAT1	1.21627e-53	-0.851224	0.668	0.746	1.91697e-49	Antibody-secreting cells
ENSSSCG00000004963	4.64695e-53	-0.847494	0.3	0.541	7.32406e-49	Antibody-secreting cells
TUBB	5.04122e-53	-1.14737	0.499	0.642	7.94547e-49	Antibody-secreting cells
ENSSSCG00000001456	5.18875e-53	-1.03784	0.72	0.763	8.17799e-49	Antibody-secreting cells
H3F3B	5.22314e-53	-0.439167	0.98	0.985	8.23218e-49	Antibody-secreting cells
CTSC	5.42389e-53	0.309045	0.725	0.342	8.5486e-49	Antibody-secreting cells
BAZ1A	5.94761e-53	-0.873966	0.206	0.48	9.37403e-49	Antibody-secreting cells
PNRC2	6.02814e-53	-0.881328	0.321	0.556	9.50095e-49	Antibody-secreting cells
HSP90AA1	3.82504e-52	-0.625773	0.887	0.909	6.02865e-48	Antibody-secreting cells
CD86	4.02816e-52	-0.827581	0.056	0.362	6.34879e-48	Antibody-secreting cells
ENSSSCG00000012119	5.05004e-52	-0.447852	0.993	0.998	7.95937e-48	Antibody-secreting cells
SRI	7.48907e-52	-0.766873	0.46	0.638	1.18035e-47	Antibody-secreting cells
ENSSSCG00000013661	8.06094e-52	-0.726832	0.539	0.658	1.27049e-47	Antibody-secreting cells
MBNL1	3.30195e-51	-0.867411	0.294	0.534	5.20421e-47	Antibody-secreting cells
ATP5PO	3.34967e-51	-0.630502	0.722	0.749	5.27942e-47	Antibody-secreting cells
SNX10	9.03834e-51	-0.849767	0.32	0.544	1.42453e-46	Antibody-secreting cells
MEF2B	1.39058e-50	-0.92482	0.251	0.502	2.19169e-46	Antibody-secreting cells
HVCN1	2.62046e-50	-0.868695	0.066	0.364	4.1301e-46	Antibody-secreting cells
PKM	4.76658e-50	-0.812405	0.395	0.58	7.5126e-46	Antibody-secreting cells
GRHPR	1.56456e-49	-0.780852	0.083	0.375	2.4659e-45	Antibody-secreting cells
SCAF11	1.75379e-49	-0.837299	0.217	0.477	2.76416e-45	Antibody-secreting cells
ENSSSCG00000033653	2.63341e-49	-0.794072	0.323	0.538	4.15051e-45	Antibody-secreting cells
HMGN3	3.84861e-49	-0.835543	0.341	0.547	6.0658e-45	Antibody-secreting cells
CNN2	7.57587e-49	-0.811749	0.25	0.499	1.19403e-44	Antibody-secreting cells
EIF4B	9.30766e-49	-0.743776	0.503	0.626	1.46698e-44	Antibody-secreting cells
ENSSSCG00000024263	1.22384e-48	-0.784759	0.4	0.581	1.92889e-44	Antibody-secreting cells
ENSSSCG00000001779	1.4767e-48	-0.818672	0.345	0.548	2.32743e-44	Antibody-secreting cells
SNX6	1.48711e-48	-0.838631	0.298	0.519	2.34384e-44	Antibody-secreting cells
PRMT1	2.28203e-48	-0.821248	0.436	0.596	3.59671e-44	Antibody-secreting cells
CD81	5.07636e-48	0.275252	0.707	0.335	8.00085e-44	Antibody-secreting cells
EIF3I	6.07965e-48	-0.777144	0.409	0.588	9.58213e-44	Antibody-secreting cells
ENSSSCG00000033212	9.30217e-48	-0.720012	0.6	0.661	1.46612e-43	Antibody-secreting cells
ENSSSCG00000016758	1.21492e-47	-0.68688	0.661	0.723	1.91484e-43	Antibody-secreting cells
WDR76	1.37347e-47	-0.789169	0.045	0.331	2.16472e-43	Antibody-secreting cells
C16orf87	1.72518e-47	-0.819247	0.057	0.344	2.71906e-43	Antibody-secreting cells
ZP3	3.12946e-47	-0.909124	0.111	0.4	4.93234e-43	Antibody-secreting cells
ENSSSCG00000012166	3.8811e-47	-0.784509	0.223	0.474	6.117e-43	Antibody-secreting cells
SRRM1	3.88199e-47	-0.800567	0.361	0.547	6.1184e-43	Antibody-secreting cells
SEPT7	4.46681e-47	-0.646654	0.654	0.71	7.04014e-43	Antibody-secreting cells
STT3B	4.58108e-47	0.291125	0.275	0.088	7.22025e-43	Antibody-secreting cells
ENSSSCG00000010077	4.94272e-47	0.466113	0.605	0.31	7.79023e-43	Antibody-secreting cells
C12orf45	7.03969e-47	-0.832641	0.485	0.619	1.10953e-42	Antibody-secreting cells
SUCLG1	7.79954e-47	-0.745628	0.436	0.591	1.22928e-42	Antibody-secreting cells
WAS	9.1559e-47	-0.825089	0.255	0.496	1.44306e-42	Antibody-secreting cells
ENSSSCG00000034190	1.43865e-46	-0.678074	0.639	0.683	2.26745e-42	Antibody-secreting cells
RANBP1	1.86965e-46	-0.857062	0.352	0.557	2.94675e-42	Antibody-secreting cells
ENSSSCG00000003903	2.57606e-46	-0.598828	0.704	0.742	4.06012e-42	Antibody-secreting cells
DDX17	3.37203e-46	-0.786973	0.449	0.601	5.31466e-42	Antibody-secreting cells
PDIA6	4.20146e-46	0.559512	0.946	0.673	6.62193e-42	Antibody-secreting cells
ARGLU1	4.34771e-46	-0.753511	0.391	0.577	6.85242e-42	Antibody-secreting cells
BLK	6.57241e-46	-0.807721	0.151	0.42	1.03588e-41	Antibody-secreting cells
ND3	8.07868e-46	-0.536669	0.833	0.814	1.27328e-41	Antibody-secreting cells
MYBL1	1.17106e-45	-0.755569	0.025	0.303	1.8457e-41	Antibody-secreting cells
NDUFB4	1.23828e-45	-0.661544	0.664	0.695	1.95165e-41	Antibody-secreting cells
SH3BGRL3	1.37957e-45	-0.710917	0.724	0.748	2.17434e-41	Antibody-secreting cells
UFM1	1.43815e-45	0.269245	0.578	0.264	2.26667e-41	Antibody-secreting cells
ENSSSCG00000034314	5.61494e-45	-0.792124	0.323	0.524	8.8497e-41	Antibody-secreting cells
UBXN1	6.18022e-45	-0.769228	0.391	0.564	9.74064e-41	Antibody-secreting cells
LMNB1	6.61112e-45	-0.782846	0.086	0.361	1.04198e-40	Antibody-secreting cells
YWHAZ	1.06871e-44	-0.77827	0.35	0.537	1.68439e-40	Antibody-secreting cells
LYN	1.26689e-44	-0.790958	0.171	0.431	1.99675e-40	Antibody-secreting cells
ENSSSCG00000029160	1.74953e-44	0.939354	0.343	0.136	2.75743e-40	Antibody-secreting cells
HCLS1	1.83298e-44	-0.724748	0.228	0.477	2.88896e-40	Antibody-secreting cells
METTL21A	3.3407e-44	-0.797566	0.11	0.374	5.26527e-40	Antibody-secreting cells
FKBP3	3.61939e-44	-0.762056	0.348	0.532	5.70452e-40	Antibody-secreting cells
HHEX	4.005e-44	-0.807374	0.032	0.303	6.31228e-40	Antibody-secreting cells
C11orf58	6.52336e-44	-0.713122	0.499	0.614	1.02815e-39	Antibody-secreting cells
ATF3	7.86706e-44	-0.909694	0.079	0.349	1.23993e-39	Antibody-secreting cells
PCNA	1.0074e-43	-1.12375	0.39	0.554	1.58776e-39	Antibody-secreting cells
SPI1	1.1308e-43	-0.816986	0.275	0.49	1.78226e-39	Antibody-secreting cells
CALR	1.18483e-43	0.492694	0.765	0.421	1.86741e-39	Antibody-secreting cells
CACYBP	1.28478e-43	-0.758294	0.551	0.637	2.02494e-39	Antibody-secreting cells
BCAS4	1.73156e-43	-0.747515	0.077	0.344	2.7291e-39	Antibody-secreting cells
FAM3C	3.31163e-43	0.380396	0.855	0.501	5.21946e-39	Antibody-secreting cells
ENSSSCG00000021560	7.83573e-43	-0.759472	0.334	0.521	1.23499e-38	Antibody-secreting cells
SFPQ	1.42656e-42	-0.777793	0.323	0.512	2.24839e-38	Antibody-secreting cells
DAPP1	1.47874e-42	-0.791169	0.16	0.411	2.33064e-38	Antibody-secreting cells
RNPS1	1.69751e-42	-0.699096	0.449	0.595	2.67544e-38	Antibody-secreting cells
TMBIM6	1.91809e-42	0.36914	0.953	0.677	3.0231e-38	Antibody-secreting cells
SNRPC	2.44738e-42	-0.711368	0.381	0.554	3.85731e-38	Antibody-secreting cells
SLA-DQB1	4.02369e-42	-1.17572	0.704	0.715	6.34173e-38	Antibody-secreting cells
ENSSSCG00000027348	6.91897e-42	-0.770559	0.221	0.457	1.0905e-37	Antibody-secreting cells
LBR	8.34637e-42	-0.806598	0.23	0.46	1.31547e-37	Antibody-secreting cells
ATP5PF	1.90452e-41	-0.558347	0.767	0.748	3.00171e-37	Antibody-secreting cells
MFAP1	3.11478e-41	-0.817895	0.264	0.479	4.90921e-37	Antibody-secreting cells
REL	6.79595e-41	-0.864921	0.196	0.432	1.07111e-36	Antibody-secreting cells
ANAPC16	7.796e-41	-0.750724	0.451	0.582	1.22873e-36	Antibody-secreting cells
MTF2	1.03038e-40	-0.784506	0.142	0.389	1.62399e-36	Antibody-secreting cells
WDR1	1.0879e-40	-0.74976	0.255	0.473	1.71464e-36	Antibody-secreting cells
RBX1	1.23102e-40	-0.735276	0.452	0.58	1.94021e-36	Antibody-secreting cells
NEDD8	1.49727e-40	-0.651995	0.513	0.628	2.35985e-36	Antibody-secreting cells
MCM7	1.9145e-40	-0.89097	0.189	0.422	3.01744e-36	Antibody-secreting cells
ENSSSCG00000008061	4.35354e-40	-0.582363	0.716	0.722	6.86161e-36	Antibody-secreting cells
ENSSSCG00000031741	5.45934e-40	-0.817242	0.242	0.462	8.60447e-36	Antibody-secreting cells
STX7	6.85131e-40	-0.730002	0.099	0.35	1.07984e-35	Antibody-secreting cells
ENSSSCG00000002907	8.98997e-40	-0.566709	0.745	0.744	1.41691e-35	Antibody-secreting cells
PTPN18	9.43846e-40	-0.645312	0.643	0.665	1.4876e-35	Antibody-secreting cells
PLEKHA2	1.09896e-39	-0.733152	0.147	0.39	1.73207e-35	Antibody-secreting cells
CD83	1.2958e-39	-1.00636	0.092	0.346	2.04231e-35	Antibody-secreting cells
MBNL3	2.19511e-39	-0.728489	0.072	0.323	3.45971e-35	Antibody-secreting cells
TOPBP1	2.52697e-39	-0.690931	0.075	0.326	3.98276e-35	Antibody-secreting cells
CAP1	3.19371e-39	-0.724686	0.312	0.509	5.0336e-35	Antibody-secreting cells
NREP	3.38774e-39	-0.750471	0.039	0.288	5.33942e-35	Antibody-secreting cells
MICOS10	3.81807e-39	-0.598384	0.609	0.669	6.01765e-35	Antibody-secreting cells
RBBP4	5.71002e-39	-0.733791	0.244	0.458	8.99956e-35	Antibody-secreting cells
CD40	8.8905e-39	-0.840297	0.122	0.365	1.40123e-34	Antibody-secreting cells
CCT4	1.24326e-38	-0.691505	0.44	0.58	1.95951e-34	Antibody-secreting cells
ENSSSCG00000023331	1.66045e-38	-0.440091	0.898	0.839	2.61703e-34	Antibody-secreting cells
HNRNPR	1.72306e-38	-0.722892	0.39	0.544	2.71571e-34	Antibody-secreting cells
PRRC2C	1.97866e-38	-0.704532	0.431	0.572	3.11856e-34	Antibody-secreting cells
ENSSSCG00000033734	2.22635e-38	-0.91919	0.585	0.679	3.50895e-34	Antibody-secreting cells
NEIL1	3.01936e-38	-0.982269	0.19	0.411	4.75881e-34	Antibody-secreting cells
UBB	3.34945e-38	-0.379452	1	0.985	5.27906e-34	Antibody-secreting cells
RASGRP1	3.38653e-38	-0.68282	0.081	0.326	5.3375e-34	Antibody-secreting cells
RRM2B	5.79648e-38	-0.698427	0.041	0.284	9.13583e-34	Antibody-secreting cells
CANX	7.99255e-38	0.302631	0.609	0.311	1.25971e-33	Antibody-secreting cells
ACP1	1.10033e-37	-0.646864	0.492	0.598	1.73423e-33	Antibody-secreting cells
ENSSSCG00000036224	1.11039e-37	3.38263	0.993	0.925	1.75009e-33	Antibody-secreting cells
PCLAF	1.22325e-37	-1.22019	0.255	0.472	1.92796e-33	Antibody-secreting cells
UNC119	1.26187e-37	-0.71377	0.171	0.397	1.98883e-33	Antibody-secreting cells
ETS1	1.58883e-37	-0.733818	0.171	0.402	2.50415e-33	Antibody-secreting cells
ENSSSCG00000031117	1.6522e-37	-0.824402	0.233	0.446	2.60403e-33	Antibody-secreting cells
SMC3	1.94156e-37	-0.745077	0.373	0.529	3.0601e-33	Antibody-secreting cells
ENSSSCG00000007088	2.34905e-37	-0.699798	0.397	0.541	3.70234e-33	Antibody-secreting cells
SH3KBP1	3.27895e-37	-0.733203	0.16	0.388	5.16795e-33	Antibody-secreting cells
AP2S1	3.54264e-37	-0.686832	0.357	0.518	5.58355e-33	Antibody-secreting cells
ENSSSCG00000014343	4.82809e-37	-0.700031	0.456	0.57	7.60956e-33	Antibody-secreting cells
MTA2	5.92011e-37	-0.701035	0.181	0.407	9.33068e-33	Antibody-secreting cells
TAF1D	1.05851e-36	-0.635483	0.657	0.672	1.66832e-32	Antibody-secreting cells
GMFG	1.15866e-36	-0.772592	0.555	0.624	1.82617e-32	Antibody-secreting cells
RPL26L1	1.28838e-36	-0.678347	0.379	0.532	2.03061e-32	Antibody-secreting cells
ENSSSCG00000037602	1.33325e-36	-0.695151	0.429	0.56	2.10134e-32	Antibody-secreting cells
SEPT6	1.90645e-36	-0.735144	0.237	0.44	3.00475e-32	Antibody-secreting cells
RCSD1	1.92358e-36	-0.778374	0.316	0.486	3.03176e-32	Antibody-secreting cells
C6orf62	2.53337e-36	-0.880723	0.269	0.466	3.99285e-32	Antibody-secreting cells
MARC2	3.39163e-36	-0.657202	0.025	0.257	5.34555e-32	Antibody-secreting cells
PSMA4	3.67752e-36	-0.686199	0.413	0.547	5.79615e-32	Antibody-secreting cells
THOC7	5.57931e-36	-0.71609	0.221	0.427	8.79355e-32	Antibody-secreting cells
POLR1D	5.84486e-36	-0.657955	0.544	0.61	9.21209e-32	Antibody-secreting cells
GRB2	5.91153e-36	-0.675148	0.478	0.586	9.31717e-32	Antibody-secreting cells
TUBA4A	6.37807e-36	-0.72516	0.329	0.498	1.00525e-31	Antibody-secreting cells
DERL3	6.65555e-36	0.281933	0.724	0.385	1.04898e-31	Antibody-secreting cells
RBM39	6.83803e-36	-0.624394	0.636	0.666	1.07774e-31	Antibody-secreting cells
PSMB1	6.90916e-36	-0.558246	0.628	0.675	1.08895e-31	Antibody-secreting cells
ENSSSCG00000030295	9.75544e-36	-0.650899	0.402	0.549	1.53756e-31	Antibody-secreting cells
EIF4A2	1.07011e-35	-0.387588	0.95	0.914	1.6866e-31	Antibody-secreting cells
BIRC5	1.26207e-35	-0.939364	0.214	0.428	1.98915e-31	Antibody-secreting cells
GPSM3	1.39258e-35	-0.756346	0.25	0.449	2.19484e-31	Antibody-secreting cells
VASP	2.35288e-35	-0.742812	0.241	0.443	3.70838e-31	Antibody-secreting cells
SMC4	2.90445e-35	-0.929558	0.321	0.495	4.5777e-31	Antibody-secreting cells
SYK	3.16754e-35	-0.737936	0.212	0.418	4.99235e-31	Antibody-secreting cells
DDT	3.68158e-35	-0.618967	0.501	0.604	5.80254e-31	Antibody-secreting cells
SLC25A3	4.01069e-35	-0.557376	0.731	0.707	6.32125e-31	Antibody-secreting cells
NOP53	4.30249e-35	-0.65168	0.346	0.518	6.78115e-31	Antibody-secreting cells
CCDC181	5.63976e-35	-0.750494	0.09	0.321	8.88882e-31	Antibody-secreting cells
BPTF	5.87868e-35	-0.699414	0.165	0.389	9.26538e-31	Antibody-secreting cells
BCL7A	6.87218e-35	-0.655589	0.056	0.287	1.08312e-30	Antibody-secreting cells
PSMB8	6.87494e-35	-0.542626	0.659	0.704	1.08356e-30	Antibody-secreting cells
ENSSSCG00000027778	7.34851e-35	-0.693871	0.187	0.402	1.1582e-30	Antibody-secreting cells
S1PR2	1.20309e-34	-0.645994	0.05	0.278	1.89619e-30	Antibody-secreting cells
PHF5A	1.27735e-34	-0.678537	0.361	0.511	2.01324e-30	Antibody-secreting cells
ENSSSCG00000014371	1.45835e-34	-0.646329	0.496	0.586	2.29851e-30	Antibody-secreting cells
ENSSSCG00000015040	1.96813e-34	-0.657972	0.47	0.567	3.10196e-30	Antibody-secreting cells
POLM	2.24545e-34	-0.704598	0.151	0.373	3.53906e-30	Antibody-secreting cells
ENSSSCG00000032003	2.25671e-34	-0.571904	0.668	0.677	3.5568e-30	Antibody-secreting cells
KPNB1	2.35188e-34	-0.704818	0.219	0.419	3.7068e-30	Antibody-secreting cells
RBMX	2.49234e-34	-0.689823	0.346	0.504	3.92818e-30	Antibody-secreting cells
CCT5	2.86975e-34	-0.64778	0.388	0.535	4.52302e-30	Antibody-secreting cells
SAP18	2.89964e-34	-0.549304	0.697	0.699	4.57012e-30	Antibody-secreting cells
BLNK	3.71051e-34	-0.732635	0.217	0.422	5.84814e-30	Antibody-secreting cells
HSPD1	4.27049e-34	-0.690741	0.566	0.635	6.73072e-30	Antibody-secreting cells
ENSSSCG00000002550	4.95534e-34	-0.523086	0.736	0.727	7.81011e-30	Antibody-secreting cells
NOL7	5.71006e-34	-0.684308	0.366	0.513	8.99963e-30	Antibody-secreting cells
RALY	1.21649e-33	-0.677355	0.332	0.492	1.91731e-29	Antibody-secreting cells
HDAC1	1.23951e-33	-0.669555	0.192	0.405	1.95359e-29	Antibody-secreting cells
ENSSSCG00000035209	1.28115e-33	-0.730873	0.296	0.473	2.01922e-29	Antibody-secreting cells
ENSSSCG00000032166	1.5672e-33	-0.585521	0.548	0.632	2.47006e-29	Antibody-secreting cells
SF3B5	1.83934e-33	-0.652184	0.357	0.517	2.89898e-29	Antibody-secreting cells
ENSSSCG00000035162	2.73842e-33	-0.721645	0.171	0.38	4.31603e-29	Antibody-secreting cells
DCK	3.12198e-33	-0.663702	0.079	0.303	4.92055e-29	Antibody-secreting cells
KHDRBS1	5.22226e-33	-0.671522	0.246	0.434	8.23081e-29	Antibody-secreting cells
CALM1	7.02771e-33	-0.532265	0.828	0.766	1.10764e-28	Antibody-secreting cells
PHB2	7.08113e-33	-0.662336	0.352	0.503	1.11606e-28	Antibody-secreting cells
ENSSSCG00000022246	7.37868e-33	-0.704986	0.07	0.292	1.16295e-28	Antibody-secreting cells
SH3BP5	1.0758e-32	-0.594473	0.036	0.253	1.69557e-28	Antibody-secreting cells
MGMT	1.40054e-32	-0.685633	0.181	0.388	2.20738e-28	Antibody-secreting cells
ENSSSCG00000034019	1.67469e-32	-0.457408	0.813	0.771	2.63947e-28	Antibody-secreting cells
BAD	2.06743e-32	-0.689001	0.118	0.332	3.25847e-28	Antibody-secreting cells
RAP1B	2.32301e-32	-0.663061	0.338	0.491	3.6613e-28	Antibody-secreting cells
LNPEP	2.81313e-32	-0.586516	0.043	0.261	4.43377e-28	Antibody-secreting cells
SNRPD3	2.95697e-32	-0.687768	0.364	0.507	4.66048e-28	Antibody-secreting cells
ENSSSCG00000028674	3.07525e-32	-0.607736	0.025	0.237	4.8469e-28	Antibody-secreting cells
TRAF5	3.23276e-32	-0.58194	0.02	0.231	5.09515e-28	Antibody-secreting cells
RAD21	5.54281e-32	-0.735981	0.257	0.435	8.73603e-28	Antibody-secreting cells
FADS3	7.15011e-32	-0.674826	0.027	0.236	1.12693e-27	Antibody-secreting cells
ENSSSCG00000003849	8.68284e-32	-0.63572	0.312	0.481	1.3685e-27	Antibody-secreting cells
RASSF2	8.96772e-32	-0.665762	0.115	0.328	1.4134e-27	Antibody-secreting cells
BCL11A	1.12347e-31	-0.649254	0.05	0.266	1.77071e-27	Antibody-secreting cells
ENSSSCG00000004666	1.15871e-31	-0.656126	0.156	0.364	1.82625e-27	Antibody-secreting cells
CD22	1.21355e-31	-0.650762	0.084	0.298	1.91267e-27	Antibody-secreting cells
NDUFS5	1.52878e-31	-0.578422	0.591	0.635	2.40951e-27	Antibody-secreting cells
RGS13	2.7425e-31	-0.643929	0.081	0.3	4.32246e-27	Antibody-secreting cells
EWSR1	3.56433e-31	-0.659508	0.291	0.461	5.61774e-27	Antibody-secreting cells
ATP5MD	3.62087e-31	-0.600049	0.573	0.625	5.70685e-27	Antibody-secreting cells
GP2	3.89111e-31	-0.67263	0.061	0.276	6.13278e-27	Antibody-secreting cells
GPD1	3.9129e-31	-0.662527	0.271	0.443	6.16711e-27	Antibody-secreting cells
DDX39B	4.49768e-31	-0.67605	0.28	0.448	7.0888e-27	Antibody-secreting cells
RHOA	4.50378e-31	-0.614699	0.544	0.606	7.0984e-27	Antibody-secreting cells
LSM2	7.88403e-31	-0.632113	0.3	0.462	1.2426e-26	Antibody-secreting cells
PSMA7	8.03302e-31	-0.549512	0.675	0.673	1.26608e-26	Antibody-secreting cells
CKS1B	1.10822e-30	-0.793504	0.311	0.481	1.74667e-26	Antibody-secreting cells
CENPF	1.53306e-30	-0.990036	0.088	0.298	2.41625e-26	Antibody-secreting cells
SIT1	1.58825e-30	-0.701451	0.402	0.53	2.50324e-26	Antibody-secreting cells
SMARCB1	2.29386e-30	-0.643079	0.215	0.401	3.61536e-26	Antibody-secreting cells
MRPL57	2.34281e-30	-0.619191	0.528	0.591	3.6925e-26	Antibody-secreting cells
GNG2	2.73468e-30	-0.62613	0.092	0.299	4.31013e-26	Antibody-secreting cells
PRPF40A	3.92843e-30	-0.630334	0.366	0.508	6.1916e-26	Antibody-secreting cells
ARHGDIA	5.10477e-30	-0.592201	0.384	0.523	8.04563e-26	Antibody-secreting cells
TAF9	5.39829e-30	-0.67262	0.343	0.485	8.50824e-26	Antibody-secreting cells
PPP4R2	6.34279e-30	-0.693255	0.271	0.435	9.99687e-26	Antibody-secreting cells
DNAJC8	8.32665e-30	-0.661392	0.332	0.476	1.31236e-25	Antibody-secreting cells
CDCA7	9.15353e-30	-0.538924	0.032	0.232	1.44269e-25	Antibody-secreting cells
ENSSSCG00000026488	1.16672e-29	-0.663881	0.192	0.379	1.83886e-25	Antibody-secreting cells
GTF2IRD1	1.38184e-29	-0.656303	0.065	0.269	2.17792e-25	Antibody-secreting cells
TERF2IP	2.08636e-29	-0.666505	0.221	0.409	3.28832e-25	Antibody-secreting cells
TP53	2.1813e-29	-0.584591	0.101	0.306	3.43795e-25	Antibody-secreting cells
ENSSSCG00000039582	2.42274e-29	-0.546063	0.53	0.614	3.81848e-25	Antibody-secreting cells
HNRNPH1	2.4419e-29	-0.641424	0.508	0.568	3.84867e-25	Antibody-secreting cells
NUDC	2.56707e-29	-0.650122	0.415	0.521	4.04596e-25	Antibody-secreting cells
TMEM258	2.87784e-29	0.282977	0.901	0.597	4.53576e-25	Antibody-secreting cells
ENSSSCG00000017555	2.92486e-29	-0.671833	0.364	0.499	4.60987e-25	Antibody-secreting cells
ENSSSCG00000000697	3.11085e-29	-0.630988	0.223	0.408	4.90302e-25	Antibody-secreting cells
SLC44A1	3.57818e-29	-0.546203	0.047	0.249	5.63958e-25	Antibody-secreting cells
CREM	4.30704e-29	-0.746269	0.661	0.685	6.78832e-25	Antibody-secreting cells
MYBL2	4.42302e-29	-0.605977	0.122	0.321	6.97113e-25	Antibody-secreting cells
RSRC2	8.28997e-29	-0.624126	0.585	0.618	1.30658e-24	Antibody-secreting cells
PPP1R12A	1.03293e-28	-0.643234	0.149	0.346	1.628e-24	Antibody-secreting cells
EIF4H	1.10748e-28	-0.614108	0.294	0.453	1.7455e-24	Antibody-secreting cells
TPR	1.18162e-28	-0.626621	0.259	0.435	1.86236e-24	Antibody-secreting cells
SF3B2	1.18599e-28	-0.633597	0.346	0.483	1.86923e-24	Antibody-secreting cells
IFI30	1.28381e-28	-0.583433	0.548	0.628	2.02342e-24	Antibody-secreting cells
SIAH1	1.35602e-28	-0.574081	0.038	0.233	2.13723e-24	Antibody-secreting cells
LSM8	1.65441e-28	-0.622513	0.309	0.461	2.60752e-24	Antibody-secreting cells
ENSSSCG00000007188	1.66177e-28	-0.577205	0.39	0.522	2.61912e-24	Antibody-secreting cells
CAPZA1	1.87738e-28	-0.595505	0.531	0.591	2.95893e-24	Antibody-secreting cells
MCM6	2.16164e-28	-0.685859	0.133	0.325	3.40696e-24	Antibody-secreting cells
TMPO	2.49192e-28	-0.651332	0.14	0.335	3.92752e-24	Antibody-secreting cells
SMC2	2.73907e-28	-0.715385	0.156	0.354	4.31704e-24	Antibody-secreting cells
TUBB4B	3.22557e-28	-0.957534	0.282	0.436	5.08382e-24	Antibody-secreting cells
SAE1	3.29014e-28	-0.589662	0.129	0.327	5.18558e-24	Antibody-secreting cells
RFTN1	3.43456e-28	-0.612985	0.138	0.335	5.41321e-24	Antibody-secreting cells
PTP4A2	6.76437e-28	-0.518635	0.702	0.686	1.06613e-23	Antibody-secreting cells
ATP6V1G1	6.79643e-28	-0.552191	0.756	0.71	1.07119e-23	Antibody-secreting cells
ENSSSCG00000028695	7.27421e-28	-0.636849	0.038	0.229	1.14649e-23	Antibody-secreting cells
VPREB1	7.81884e-28	-0.659632	0.102	0.309	1.23233e-23	Antibody-secreting cells
ATP5IF1	8.4233e-28	-0.590175	0.508	0.579	1.3276e-23	Antibody-secreting cells
TPX2	9.22639e-28	-0.865575	0.117	0.309	1.45417e-23	Antibody-secreting cells
CCNB1IP1	1.40082e-27	-0.664696	0.174	0.361	2.20783e-23	Antibody-secreting cells
EBF1	1.51465e-27	-0.582486	0.045	0.237	2.38724e-23	Antibody-secreting cells
HIGD2A	1.54843e-27	-0.61251	0.418	0.522	2.44049e-23	Antibody-secreting cells
ENSSSCG00000020790	1.65426e-27	-0.550185	0.58	0.616	2.60729e-23	Antibody-secreting cells
SMC1A	1.90646e-27	-0.630009	0.187	0.368	3.00477e-23	Antibody-secreting cells
CENPE	2.02225e-27	-0.759335	0.144	0.331	3.18727e-23	Antibody-secreting cells
RGS19	2.09492e-27	-0.675107	0.284	0.441	3.30181e-23	Antibody-secreting cells
CDK4	2.83833e-27	-0.621385	0.251	0.414	4.47349e-23	Antibody-secreting cells
PARP1	3.04603e-27	-0.592101	0.126	0.316	4.80085e-23	Antibody-secreting cells
AIMP1	3.09485e-27	-0.632812	0.302	0.449	4.87779e-23	Antibody-secreting cells
PSMA6	3.18236e-27	-0.561867	0.53	0.592	5.01572e-23	Antibody-secreting cells
CLTA	4.13057e-27	-0.64127	0.417	0.508	6.51019e-23	Antibody-secreting cells
MAPRE2	4.26218e-27	-0.61529	0.196	0.377	6.71763e-23	Antibody-secreting cells
MOB1A	4.49545e-27	-0.621689	0.189	0.369	7.08529e-23	Antibody-secreting cells
DDX39A	4.8505e-27	-0.628005	0.192	0.375	7.64487e-23	Antibody-secreting cells
ENSSSCG00000010320	4.93653e-27	-0.572037	0.35	0.489	7.78046e-23	Antibody-secreting cells
IKZF2	6.84354e-27	-0.606868	0.099	0.293	1.07861e-22	Antibody-secreting cells
TRIM22	9.16361e-27	-0.678408	0.251	0.412	1.44428e-22	Antibody-secreting cells
ARID4B	1.24377e-26	-0.652562	0.354	0.479	1.96031e-22	Antibody-secreting cells
ENSSSCG00000020808	1.34724e-26	-0.615932	0.239	0.407	2.12339e-22	Antibody-secreting cells
CNR2	1.41624e-26	-0.560479	0.027	0.208	2.23213e-22	Antibody-secreting cells
ENSSSCG00000017213	1.69845e-26	-0.698243	0.488	0.548	2.67692e-22	Antibody-secreting cells
PRKAR1A	1.71878e-26	-0.605938	0.282	0.44	2.70898e-22	Antibody-secreting cells
IL4I1	1.7247e-26	-0.595919	0.025	0.207	2.7183e-22	Antibody-secreting cells
EIF1B	1.72888e-26	-0.628786	0.47	0.538	2.72489e-22	Antibody-secreting cells
ZC3H13	1.9106e-26	-0.798893	0.259	0.415	3.0113e-22	Antibody-secreting cells
RGS1	1.94537e-26	0.665118	0.844	0.649	3.06611e-22	Antibody-secreting cells
RFC2	1.97551e-26	-0.617459	0.264	0.42	3.11361e-22	Antibody-secreting cells
FCRL3	2.37603e-26	-0.599326	0.088	0.28	3.74486e-22	Antibody-secreting cells
ENSSSCG00000027746	2.57891e-26	-0.585989	0.533	0.573	4.06462e-22	Antibody-secreting cells
YWHAQ	2.9626e-26	-0.590259	0.309	0.454	4.66935e-22	Antibody-secreting cells
IRF8	3.65081e-26	-0.674859	0.452	0.533	5.75403e-22	Antibody-secreting cells
ENSSSCG00000040118	3.68189e-26	-0.658789	0.51	0.569	5.80302e-22	Antibody-secreting cells
TNFRSF13C	3.91065e-26	-0.653642	0.111	0.297	6.16357e-22	Antibody-secreting cells
ENSSSCG00000018063	4.23815e-26	-0.665309	0.632	0.646	6.67974e-22	Antibody-secreting cells
ENSSSCG00000014075	4.62798e-26	-0.599964	0.424	0.523	7.29416e-22	Antibody-secreting cells
ENSSSCG00000000097	5.10814e-26	-0.584818	0.519	0.575	8.05093e-22	Antibody-secreting cells
ENSSSCG00000000377	5.27263e-26	-0.596981	0.199	0.376	8.31019e-22	Antibody-secreting cells
ENSSSCG00000029857	6.46283e-26	-0.614461	0.309	0.453	1.01861e-21	Antibody-secreting cells
ENSSSCG00000017626	6.91864e-26	-0.606292	0.201	0.369	1.09045e-21	Antibody-secreting cells
DBNL	1.11322e-25	-0.63841	0.271	0.419	1.75454e-21	Antibody-secreting cells
PRKCB	1.36758e-25	-0.657027	0.145	0.327	2.15545e-21	Antibody-secreting cells
NONO	1.59118e-25	-0.582999	0.3	0.441	2.50786e-21	Antibody-secreting cells
ILF3	1.71572e-25	-0.592094	0.233	0.395	2.70414e-21	Antibody-secreting cells
RPA3	1.74731e-25	-0.673864	0.372	0.486	2.75394e-21	Antibody-secreting cells
NDUFB8	1.76543e-25	-0.576029	0.496	0.56	2.78249e-21	Antibody-secreting cells
RABEP1	1.90933e-25	-0.573471	0.095	0.279	3.0093e-21	Antibody-secreting cells
RHOG	2.13245e-25	-0.640767	0.339	0.461	3.36095e-21	Antibody-secreting cells
ENSSSCG00000006156	2.87193e-25	-0.564086	0.562	0.598	4.52645e-21	Antibody-secreting cells
SASH3	3.03826e-25	-0.61737	0.278	0.425	4.7886e-21	Antibody-secreting cells
UHRF1	3.14722e-25	-0.527025	0.063	0.245	4.96034e-21	Antibody-secreting cells
PSMB2	3.19474e-25	-0.48219	0.589	0.623	5.03524e-21	Antibody-secreting cells
MTPN	4.21462e-25	-0.632893	0.23	0.389	6.64267e-21	Antibody-secreting cells
GRAP	4.257e-25	-0.646415	0.183	0.353	6.70946e-21	Antibody-secreting cells
FANCI	8.04203e-25	-0.520044	0.047	0.223	1.2675e-20	Antibody-secreting cells
VPS4B	8.0593e-25	-0.627113	0.246	0.402	1.27023e-20	Antibody-secreting cells
BUD31	9.09006e-25	-0.588892	0.37	0.48	1.43268e-20	Antibody-secreting cells
ENSA	9.26979e-25	-0.614606	0.348	0.476	1.46101e-20	Antibody-secreting cells
ELAVL1	9.55801e-25	-0.590221	0.3	0.44	1.50644e-20	Antibody-secreting cells
TOP2A	1.70583e-24	-0.949688	0.118	0.3	2.68855e-20	Antibody-secreting cells
COX7A2	1.99845e-24	-0.383962	0.824	0.773	3.14976e-20	Antibody-secreting cells
FH	2.15325e-24	-0.552163	0.226	0.389	3.39374e-20	Antibody-secreting cells
TMEM131	2.63576e-24	-0.567318	0.127	0.303	4.15422e-20	Antibody-secreting cells
HPF1	2.6439e-24	-0.563479	0.185	0.356	4.16704e-20	Antibody-secreting cells
ENSSSCG00000014969	3.19453e-24	-0.590887	0.172	0.341	5.0349e-20	Antibody-secreting cells
MND1	3.89699e-24	-0.471201	0.043	0.214	6.14204e-20	Antibody-secreting cells
ARHGAP30	3.94178e-24	-0.631929	0.187	0.353	6.21264e-20	Antibody-secreting cells
AHI1	4.38378e-24	-0.729672	0.111	0.288	6.90927e-20	Antibody-secreting cells
POLR2G	6.63951e-24	-0.59633	0.314	0.446	1.04645e-19	Antibody-secreting cells
LSM3	7.65267e-24	-0.558443	0.338	0.469	1.20614e-19	Antibody-secreting cells
EIF3L	7.84989e-24	-0.580499	0.361	0.471	1.23722e-19	Antibody-secreting cells
BRWD1	8.09578e-24	-0.591445	0.189	0.355	1.27598e-19	Antibody-secreting cells
AHSA1	8.19902e-24	-0.616727	0.343	0.465	1.29225e-19	Antibody-secreting cells
ENSSSCG00000004145	8.57457e-24	-0.598966	0.262	0.41	1.35144e-19	Antibody-secreting cells
CFDP1	9.08951e-24	-0.586391	0.44	0.527	1.4326e-19	Antibody-secreting cells
KIF20B	1.00138e-23	-0.572433	0.081	0.256	1.57827e-19	Antibody-secreting cells
CALM3	1.05889e-23	-0.629869	0.391	0.486	1.66892e-19	Antibody-secreting cells
THRAP3	1.10577e-23	-0.584772	0.278	0.42	1.74281e-19	Antibody-secreting cells
CDC5L	1.13462e-23	-0.584247	0.187	0.35	1.78827e-19	Antibody-secreting cells
MRPL10	1.3113e-23	-0.605475	0.151	0.321	2.06674e-19	Antibody-secreting cells
ENSSSCG00000035544	1.31187e-23	-0.713691	0.154	0.321	2.06764e-19	Antibody-secreting cells
NASP	1.47996e-23	-0.54059	0.127	0.304	2.33257e-19	Antibody-secreting cells
CNOT7	1.54062e-23	-0.580365	0.21	0.374	2.42817e-19	Antibody-secreting cells
SRSF5	1.62873e-23	-0.589009	0.722	0.694	2.56704e-19	Antibody-secreting cells
ELMO1	1.68902e-23	-0.591884	0.101	0.272	2.66207e-19	Antibody-secreting cells
HSBP1	1.76509e-23	-0.548981	0.215	0.375	2.78197e-19	Antibody-secreting cells
ENSSSCG00000005453	2.03095e-23	-0.504981	0.813	0.739	3.20098e-19	Antibody-secreting cells
HIST1H2AB	2.03875e-23	-1.61091	0.546	0.569	3.21327e-19	Antibody-secreting cells
C12orf10	2.25683e-23	-0.551367	0.53	0.57	3.557e-19	Antibody-secreting cells
UBE2T	2.74147e-23	-0.718485	0.111	0.281	4.32084e-19	Antibody-secreting cells
RNASEH2C	2.77751e-23	-0.571271	0.269	0.409	4.37763e-19	Antibody-secreting cells
PTPN6	3.24466e-23	-0.716964	0.451	0.518	5.1139e-19	Antibody-secreting cells
PPP1R18	3.27141e-23	-0.577927	0.354	0.479	5.15607e-19	Antibody-secreting cells
ENSSSCG00000021591	3.57574e-23	-0.615659	0.625	0.621	5.63573e-19	Antibody-secreting cells
ENSSSCG00000000576	3.70089e-23	-0.487126	0.713	0.693	5.83298e-19	Antibody-secreting cells
DDX46	3.7644e-23	-0.541496	0.399	0.511	5.93308e-19	Antibody-secreting cells
NUDT21	4.91196e-23	-0.581733	0.32	0.44	7.74173e-19	Antibody-secreting cells
SNX3	5.09448e-23	-0.522593	0.583	0.598	8.02941e-19	Antibody-secreting cells
GON7	5.2276e-23	-0.615955	0.284	0.413	8.23922e-19	Antibody-secreting cells
MILR1	8.23673e-23	-0.485375	0.029	0.191	1.29819e-18	Antibody-secreting cells
EIF4G2	8.60755e-23	-0.52109	0.652	0.633	1.35664e-18	Antibody-secreting cells
SLA-DOA	8.84523e-23	-0.4787	0.029	0.191	1.3941e-18	Antibody-secreting cells
SLC44A2	1.05196e-22	-0.62703	0.183	0.344	1.658e-18	Antibody-secreting cells
SMARCA4	1.17443e-22	-0.532893	0.142	0.311	1.85102e-18	Antibody-secreting cells
BZW1	1.26044e-22	-0.553304	0.506	0.552	1.98659e-18	Antibody-secreting cells
DARS	1.35524e-22	-0.593159	0.165	0.327	2.13599e-18	Antibody-secreting cells
FCRL1	1.54067e-22	-0.508525	0.031	0.19	2.42825e-18	Antibody-secreting cells
EIF2S1	1.55665e-22	-0.570522	0.214	0.369	2.45344e-18	Antibody-secreting cells
INPP5D	1.55845e-22	-0.560267	0.149	0.315	2.45627e-18	Antibody-secreting cells
MRPL40	1.85998e-22	-0.609329	0.373	0.462	2.93151e-18	Antibody-secreting cells
WDR77	2.24977e-22	-0.664224	0.194	0.349	3.54586e-18	Antibody-secreting cells
FAM76B	2.70442e-22	-0.471638	0.043	0.205	4.26244e-18	Antibody-secreting cells
SUMO1	2.82442e-22	-0.57055	0.382	0.477	4.45157e-18	Antibody-secreting cells
ENSSSCG00000001407	3.56011e-22	-0.487516	0.052	0.216	5.61109e-18	Antibody-secreting cells
HNRNPD	3.60057e-22	-0.553859	0.214	0.363	5.67485e-18	Antibody-secreting cells
HSPB1	3.63781e-22	-0.407834	0.867	0.847	5.73356e-18	Antibody-secreting cells
RASGRP2	4.25644e-22	-0.564181	0.111	0.277	6.70857e-18	Antibody-secreting cells
POMP	4.37268e-22	-0.508265	0.583	0.602	6.89179e-18	Antibody-secreting cells
DHX9	4.79987e-22	-0.568045	0.276	0.413	7.56508e-18	Antibody-secreting cells
PYCARD	4.88571e-22	-0.508007	0.048	0.209	7.70037e-18	Antibody-secreting cells
RCC2	5.45737e-22	-0.528784	0.165	0.327	8.60135e-18	Antibody-secreting cells
HNRNPH3	6.8515e-22	-0.625214	0.418	0.492	1.07986e-17	Antibody-secreting cells
NOP56	7.06423e-22	-0.5876	0.327	0.448	1.11339e-17	Antibody-secreting cells
ENSSSCG00000001414	8.01886e-22	-0.561042	0.445	0.515	1.26385e-17	Antibody-secreting cells
ENSSSCG00000027675	8.17215e-22	-0.572398	0.086	0.251	1.28801e-17	Antibody-secreting cells
SNX2	9.4917e-22	-0.562616	0.124	0.286	1.49599e-17	Antibody-secreting cells
RAP1A	9.94081e-22	-0.53658	0.433	0.521	1.56677e-17	Antibody-secreting cells
PNN	9.99447e-22	-0.556096	0.539	0.568	1.57523e-17	Antibody-secreting cells
NUF2	1.06808e-21	-0.579091	0.092	0.253	1.6834e-17	Antibody-secreting cells
CNOT6L	1.12219e-21	-0.550751	0.18	0.341	1.76869e-17	Antibody-secreting cells
IKZF3	1.2778e-21	-0.568993	0.176	0.336	2.01394e-17	Antibody-secreting cells
UBAC2	1.29367e-21	-0.542695	0.117	0.28	2.03895e-17	Antibody-secreting cells
APBB1IP	1.29976e-21	-0.529894	0.106	0.268	2.04856e-17	Antibody-secreting cells
MNDA	1.37621e-21	-0.586702	0.027	0.179	2.16905e-17	Antibody-secreting cells
LBH	1.48152e-21	-0.496051	0.047	0.206	2.33502e-17	Antibody-secreting cells
COX5A	1.48266e-21	-0.466956	0.662	0.647	2.33681e-17	Antibody-secreting cells
PHF6	1.73613e-21	-0.532172	0.11	0.277	2.73631e-17	Antibody-secreting cells
BRD3	1.76864e-21	-0.402645	0.023	0.176	2.78756e-17	Antibody-secreting cells
ZC3H14	2.61586e-21	-0.56599	0.176	0.328	4.12285e-17	Antibody-secreting cells
CBX5	2.67957e-21	-0.52772	0.153	0.312	4.22327e-17	Antibody-secreting cells
KIFC1	2.7989e-21	-0.56466	0.101	0.263	4.41134e-17	Antibody-secreting cells
RETREG1	2.82329e-21	-0.431259	0.023	0.174	4.44978e-17	Antibody-secreting cells
ENSSSCG00000022773	3.17339e-21	-0.392859	0.016	0.164	5.00159e-17	Antibody-secreting cells
POU2F2	3.32802e-21	-0.593545	0.176	0.329	5.2453e-17	Antibody-secreting cells
TOMM34	3.41778e-21	-0.44326	0.047	0.203	5.38676e-17	Antibody-secreting cells
ENSSSCG00000000500	3.5075e-21	-0.418031	0.023	0.173	5.52817e-17	Antibody-secreting cells
ENSSSCG00000040248	3.60237e-21	-0.571428	0.187	0.341	5.67769e-17	Antibody-secreting cells
MCM4	4.57259e-21	-0.481067	0.092	0.256	7.20686e-17	Antibody-secreting cells
TMEM255B	5.91732e-21	-0.479921	0.043	0.198	9.32629e-17	Antibody-secreting cells
CPSF6	6.00163e-21	-0.551675	0.197	0.347	9.45917e-17	Antibody-secreting cells
PSMB7	7.02649e-21	-0.485749	0.481	0.546	1.10745e-16	Antibody-secreting cells
H2AFY	7.52068e-21	-0.451041	0.081	0.24	1.18533e-16	Antibody-secreting cells
ENSSSCG00000011209	8.58054e-21	-0.392307	0.018	0.164	1.35238e-16	Antibody-secreting cells
GLRX3	8.93633e-21	-0.543461	0.269	0.398	1.40845e-16	Antibody-secreting cells
CCNI	1.12188e-20	-0.597792	0.309	0.427	1.76819e-16	Antibody-secreting cells
ENSSSCG00000013650	1.20386e-20	-0.551376	0.194	0.339	1.89741e-16	Antibody-secreting cells
EPS15	1.22528e-20	-0.554631	0.156	0.311	1.93116e-16	Antibody-secreting cells
ENSSSCG00000007688	2.39502e-20	-0.546162	0.521	0.542	3.77479e-16	Antibody-secreting cells
ENSSSCG00000013878	2.51501e-20	-0.576744	0.321	0.427	3.96391e-16	Antibody-secreting cells
EXO1	2.72403e-20	-0.605734	0.221	0.364	4.29335e-16	Antibody-secreting cells
MAP4K4	2.88278e-20	-0.438392	0.05	0.204	4.54355e-16	Antibody-secreting cells
CAPZA2	3.15441e-20	-0.568585	0.307	0.421	4.97166e-16	Antibody-secreting cells
ENSSSCG00000002688	3.19513e-20	-0.5631	0.208	0.351	5.03585e-16	Antibody-secreting cells
RAB35	3.245e-20	-0.571941	0.165	0.313	5.11444e-16	Antibody-secreting cells
EIF3D	3.6168e-20	-0.529384	0.443	0.509	5.70044e-16	Antibody-secreting cells
UQCRQ	3.64588e-20	-0.530403	0.497	0.542	5.74627e-16	Antibody-secreting cells
SSX2IP	4.53125e-20	-0.456064	0.032	0.178	7.1417e-16	Antibody-secreting cells
ENSSSCG00000012178	4.54344e-20	-0.647942	0.257	0.384	7.16091e-16	Antibody-secreting cells
ENSSSCG00000017032	4.59995e-20	-0.47248	0.047	0.196	7.24998e-16	Antibody-secreting cells
ENSSSCG00000004446	6.04077e-20	-0.518206	0.503	0.545	9.52086e-16	Antibody-secreting cells
CETN3	6.05575e-20	-0.477081	0.097	0.252	9.54447e-16	Antibody-secreting cells
PPP4C	6.76375e-20	-0.547137	0.259	0.387	1.06603e-15	Antibody-secreting cells
SF3B1	7.18566e-20	-0.556268	0.456	0.512	1.13253e-15	Antibody-secreting cells
PBK	8.65554e-20	-0.414959	0.052	0.204	1.3642e-15	Antibody-secreting cells
DFFB	9.23937e-20	-0.532074	0.09	0.242	1.45622e-15	Antibody-secreting cells
PTBP1	9.823e-20	-0.504365	0.395	0.486	1.5482e-15	Antibody-secreting cells
RNF181	1.08036e-19	-0.574309	0.395	0.472	1.70275e-15	Antibody-secreting cells
CELF1	1.21272e-19	-0.537146	0.183	0.331	1.91136e-15	Antibody-secreting cells
CHD3	1.23757e-19	-0.526599	0.162	0.31	1.95053e-15	Antibody-secreting cells
HMGA1	1.33745e-19	-0.579937	0.275	0.397	2.10795e-15	Antibody-secreting cells
SPC24	1.41298e-19	-0.550532	0.16	0.309	2.227e-15	Antibody-secreting cells
ANKRD13A	1.42194e-19	-0.484828	0.093	0.247	2.24112e-15	Antibody-secreting cells
DDX24	1.43718e-19	-0.526445	0.232	0.373	2.26513e-15	Antibody-secreting cells
ENSSSCG00000025525	1.45802e-19	-0.516325	0.133	0.284	2.29798e-15	Antibody-secreting cells
CTCF	1.57719e-19	-0.541129	0.185	0.332	2.48581e-15	Antibody-secreting cells
CSNK1A1	1.64847e-19	-0.542137	0.422	0.488	2.59815e-15	Antibody-secreting cells
ZBTB18	2.02114e-19	-0.553026	0.074	0.223	3.18552e-15	Antibody-secreting cells
MYO5A	2.03126e-19	-0.543031	0.302	0.42	3.20146e-15	Antibody-secreting cells
ENSSSCG00000033068	2.0886e-19	-0.461943	0.724	0.655	3.29185e-15	Antibody-secreting cells
STAG2	2.22714e-19	-0.52893	0.176	0.32	3.5102e-15	Antibody-secreting cells
MRPL55	2.38191e-19	-0.571885	0.417	0.476	3.75413e-15	Antibody-secreting cells
TFDP2	2.39087e-19	-0.549726	0.083	0.231	3.76825e-15	Antibody-secreting cells
CHTOP	2.74943e-19	-0.557271	0.251	0.377	4.33337e-15	Antibody-secreting cells
CWC15	2.75528e-19	-0.562379	0.25	0.373	4.3426e-15	Antibody-secreting cells
TK1	2.99922e-19	-0.6344	0.138	0.288	4.72707e-15	Antibody-secreting cells
EZR	3.17337e-19	-0.485044	0.558	0.584	5.00156e-15	Antibody-secreting cells
LHPP	3.30802e-19	-0.496404	0.066	0.214	5.21376e-15	Antibody-secreting cells
ENSSSCG00000037071	3.5842e-19	-0.534484	0.293	0.409	5.64906e-15	Antibody-secreting cells
CSE1L	4.13759e-19	-0.472496	0.129	0.28	6.52125e-15	Antibody-secreting cells
ENSSSCG00000031083	4.23506e-19	-0.509017	0.156	0.303	6.67488e-15	Antibody-secreting cells
DOCK2	4.25356e-19	-0.477911	0.113	0.265	6.70403e-15	Antibody-secreting cells
TMEM131L	4.38891e-19	-0.463015	0.066	0.213	6.91736e-15	Antibody-secreting cells
ASF1B	4.7566e-19	-0.45023	0.065	0.21	7.49688e-15	Antibody-secreting cells
CCT8	4.85591e-19	-0.501245	0.212	0.352	7.6534e-15	Antibody-secreting cells
NCL	5.28882e-19	-0.552256	0.415	0.496	8.3357e-15	Antibody-secreting cells
NDUFC1	5.79984e-19	-0.496285	0.492	0.537	9.14113e-15	Antibody-secreting cells
PDCD10	6.44268e-19	-0.539855	0.244	0.374	1.01543e-14	Antibody-secreting cells
ENSSSCG00000010214	6.97772e-19	-0.546693	0.102	0.254	1.09976e-14	Antibody-secreting cells
ENSSSCG00000002505	7.59056e-19	-0.56859	0.309	0.417	1.19635e-14	Antibody-secreting cells
IK	7.60825e-19	-0.56709	0.343	0.442	1.19914e-14	Antibody-secreting cells
RTN4	8.10475e-19	-0.546909	0.203	0.341	1.27739e-14	Antibody-secreting cells
ENSSSCG00000013155	8.19139e-19	-0.519608	0.181	0.322	1.29105e-14	Antibody-secreting cells
EHD3	9.44998e-19	-0.430803	0.057	0.201	1.48941e-14	Antibody-secreting cells
TRIM38	9.73605e-19	-0.522763	0.144	0.288	1.5345e-14	Antibody-secreting cells
AP1M1	1.00823e-18	-0.463581	0.097	0.243	1.58907e-14	Antibody-secreting cells
HUS1	1.08084e-18	-0.47433	0.131	0.277	1.70351e-14	Antibody-secreting cells
HP1BP3	1.14806e-18	-0.595778	0.201	0.336	1.80945e-14	Antibody-secreting cells
SNRPA1	1.23831e-18	-0.524443	0.253	0.378	1.9517e-14	Antibody-secreting cells
FNBP4	1.30291e-18	-0.601985	0.336	0.431	2.05351e-14	Antibody-secreting cells
PFDN2	1.57404e-18	-0.527644	0.348	0.445	2.48085e-14	Antibody-secreting cells
ROCK1	1.83313e-18	-0.517517	0.189	0.329	2.88919e-14	Antibody-secreting cells
PNP	1.86791e-18	-0.390086	0.057	0.203	2.94401e-14	Antibody-secreting cells
HLA-DOB	1.89166e-18	-0.457708	0.027	0.161	2.98144e-14	Antibody-secreting cells
YEATS4	1.97957e-18	-0.443673	0.101	0.246	3.12e-14	Antibody-secreting cells
ENSSSCG00000004307	2.00033e-18	-0.559742	0.232	0.357	3.15272e-14	Antibody-secreting cells
RPL10A	2.11131e-18	-0.552448	0.334	0.43	3.32763e-14	Antibody-secreting cells
MRPS12	2.17289e-18	-0.463564	0.167	0.31	3.42469e-14	Antibody-secreting cells
CREB1	2.21706e-18	-0.4601	0.063	0.206	3.49431e-14	Antibody-secreting cells
COA3	2.47796e-18	-0.520292	0.244	0.368	3.90551e-14	Antibody-secreting cells
SLC25A5	2.52096e-18	-0.49935	0.558	0.566	3.97329e-14	Antibody-secreting cells
AURKB	3.04639e-18	-0.400066	0.043	0.182	4.80142e-14	Antibody-secreting cells
GCK	3.16003e-18	-0.411095	0.018	0.148	4.98052e-14	Antibody-secreting cells
MAD2L1	3.21944e-18	-0.502669	0.172	0.312	5.07416e-14	Antibody-secreting cells
CDC20	3.73166e-18	-0.597276	0.07	0.213	5.88148e-14	Antibody-secreting cells
DIPK1A	3.76972e-18	-0.465138	0.083	0.226	5.94145e-14	Antibody-secreting cells
USP7	3.78565e-18	-0.435947	0.09	0.236	5.96657e-14	Antibody-secreting cells
SUGT1	3.86848e-18	-0.547921	0.275	0.389	6.09712e-14	Antibody-secreting cells
RHOH	4.43986e-18	-0.576785	0.354	0.444	6.99766e-14	Antibody-secreting cells
POLR2D	4.52808e-18	-0.5554	0.366	0.453	7.13671e-14	Antibody-secreting cells
CHORDC1	4.78332e-18	-0.506414	0.156	0.298	7.53899e-14	Antibody-secreting cells
ENSSSCG00000015664	5.163e-18	-0.416146	0.014	0.141	8.13741e-14	Antibody-secreting cells
JMJD1C	5.36296e-18	-0.572705	0.25	0.374	8.45256e-14	Antibody-secreting cells
POLR2E	5.43203e-18	-0.521824	0.372	0.456	8.56142e-14	Antibody-secreting cells
ENSSSCG00000016096	5.8244e-18	-0.511857	0.185	0.32	9.17983e-14	Antibody-secreting cells
BCL6	8.28726e-18	-0.449617	0.07	0.211	1.30615e-13	Antibody-secreting cells
HES1	9.28878e-18	-0.58413	0.059	0.197	1.464e-13	Antibody-secreting cells
ENSSSCG00000036658	1.02529e-17	-0.479748	0.526	0.549	1.61596e-13	Antibody-secreting cells
ENSSSCG00000012811	1.06902e-17	-0.503429	0.291	0.401	1.68488e-13	Antibody-secreting cells
ATXN7L3B	1.15781e-17	-0.508576	0.158	0.297	1.82483e-13	Antibody-secreting cells
BRK1	1.26686e-17	-0.500293	0.449	0.503	1.9967e-13	Antibody-secreting cells
MCM3	1.36073e-17	-0.439338	0.059	0.199	2.14464e-13	Antibody-secreting cells
DCP2	1.69716e-17	-0.477421	0.122	0.261	2.67489e-13	Antibody-secreting cells
POLD1	1.78714e-17	-0.351844	0.048	0.185	2.81671e-13	Antibody-secreting cells
MEA1	1.79209e-17	-0.52021	0.255	0.371	2.82452e-13	Antibody-secreting cells
SCAND1	1.84852e-17	-0.538508	0.408	0.475	2.91345e-13	Antibody-secreting cells
KRR1	2.11815e-17	-0.492089	0.147	0.288	3.33842e-13	Antibody-secreting cells
ENSSSCG00000020870	2.18189e-17	-0.502841	0.115	0.254	3.43887e-13	Antibody-secreting cells
TWF2	2.59861e-17	-0.499971	0.167	0.3	4.09566e-13	Antibody-secreting cells
DPY30	2.62026e-17	-0.499962	0.402	0.471	4.12979e-13	Antibody-secreting cells
TCF3	2.85348e-17	-0.535657	0.228	0.352	4.49736e-13	Antibody-secreting cells
FUNDC2	2.97514e-17	-0.550481	0.334	0.426	4.68912e-13	Antibody-secreting cells
TBL1XR1	3.0849e-17	-0.450069	0.108	0.247	4.8621e-13	Antibody-secreting cells
UQCR10	3.09789e-17	-0.490193	0.569	0.566	4.88259e-13	Antibody-secreting cells
LAMTOR5	3.13978e-17	-0.479933	0.517	0.547	4.9486e-13	Antibody-secreting cells
ENSSSCG00000009788	3.18106e-17	-0.525355	0.257	0.374	5.01367e-13	Antibody-secreting cells
PPP2CA	3.93021e-17	-0.521049	0.445	0.49	6.19441e-13	Antibody-secreting cells
KIF11	4.66086e-17	-0.390446	0.047	0.179	7.34599e-13	Antibody-secreting cells
PXK	4.86557e-17	-0.411927	0.086	0.227	7.66863e-13	Antibody-secreting cells
PARK7	4.9213e-17	-0.378618	0.662	0.649	7.75647e-13	Antibody-secreting cells
MSH6	5.0168e-17	-0.454213	0.101	0.239	7.90698e-13	Antibody-secreting cells
SUPT16H	5.67044e-17	-0.443392	0.126	0.265	8.93719e-13	Antibody-secreting cells
SAFB	5.70738e-17	-0.519343	0.242	0.362	8.99541e-13	Antibody-secreting cells
ZC3H12D	5.73118e-17	-0.381601	0.029	0.155	9.03291e-13	Antibody-secreting cells
FERMT3	6.43552e-17	-0.559638	0.273	0.378	1.0143e-12	Antibody-secreting cells
RNF4	6.55316e-17	-0.438367	0.104	0.242	1.03284e-12	Antibody-secreting cells
SORL1	7.06681e-17	-0.509282	0.165	0.3	1.1138e-12	Antibody-secreting cells
ITSN2	7.32181e-17	-0.582168	0.294	0.391	1.15399e-12	Antibody-secreting cells
ATAD5	8.04771e-17	-0.397718	0.075	0.211	1.2684e-12	Antibody-secreting cells
GP91-PHOX	8.17715e-17	-0.442001	0.074	0.21	1.2888e-12	Antibody-secreting cells
RBM42	9.86351e-17	-0.523226	0.302	0.398	1.55459e-12	Antibody-secreting cells
OSTF1	1.13006e-16	-0.546536	0.388	0.464	1.78109e-12	Antibody-secreting cells
PRXL2A	1.14782e-16	-0.374353	0.043	0.173	1.80907e-12	Antibody-secreting cells
ENSSSCG00000026354	1.19919e-16	-0.530506	0.156	0.289	1.89005e-12	Antibody-secreting cells
PRRT1B	1.30242e-16	-0.389691	0.023	0.145	2.05274e-12	Antibody-secreting cells
MCPH1	1.43318e-16	-0.401378	0.048	0.178	2.25884e-12	Antibody-secreting cells
ESD	1.52449e-16	-0.528646	0.409	0.47	2.40275e-12	Antibody-secreting cells
MRPL49	1.56033e-16	-0.49727	0.142	0.273	2.45923e-12	Antibody-secreting cells
ENSSSCG00000040396	1.56369e-16	-0.47237	0.203	0.327	2.46453e-12	Antibody-secreting cells
LAMP3	1.58035e-16	-0.321577	0.005	0.118	2.49078e-12	Antibody-secreting cells
SLIRP	1.58309e-16	-0.518374	0.325	0.409	2.49512e-12	Antibody-secreting cells
RAPGEF5	1.69446e-16	-0.327238	0.011	0.127	2.67064e-12	Antibody-secreting cells
VPS13C	1.77726e-16	-0.317232	0.018	0.138	2.80114e-12	Antibody-secreting cells
UBE2V2	1.79861e-16	-0.511206	0.379	0.452	2.83479e-12	Antibody-secreting cells
CDT1	2.15793e-16	-0.403915	0.079	0.214	3.40111e-12	Antibody-secreting cells
ENSSSCG00000037143	2.17963e-16	-0.48429	0.449	0.496	3.43532e-12	Antibody-secreting cells
CINP	2.21992e-16	-0.480734	0.16	0.291	3.49882e-12	Antibody-secreting cells
ENSSSCG00000005436	2.34876e-16	-0.502202	0.223	0.343	3.70188e-12	Antibody-secreting cells
CENPW	2.65306e-16	-0.461867	0.163	0.295	4.18149e-12	Antibody-secreting cells
PRDX3	2.7201e-16	-0.492946	0.318	0.412	4.28714e-12	Antibody-secreting cells
RBBP7	2.92983e-16	-0.447124	0.162	0.294	4.6177e-12	Antibody-secreting cells
HELLS	3.13989e-16	-0.395264	0.079	0.213	4.94879e-12	Antibody-secreting cells
ENSSSCG00000001097	3.24372e-16	-0.433752	0.063	0.192	5.11243e-12	Antibody-secreting cells
TFDP1	3.37142e-16	-0.415689	0.101	0.233	5.31369e-12	Antibody-secreting cells
ATRX	3.37841e-16	-0.537635	0.241	0.358	5.32471e-12	Antibody-secreting cells
SARNP	3.40974e-16	-0.494091	0.275	0.382	5.37409e-12	Antibody-secreting cells
GYG1	4.36261e-16	-0.459797	0.093	0.226	6.87591e-12	Antibody-secreting cells
BUB3	4.76384e-16	-0.527011	0.242	0.353	7.50829e-12	Antibody-secreting cells
SMARCE1	5.02013e-16	-0.482134	0.275	0.383	7.91222e-12	Antibody-secreting cells
BACH2	5.02656e-16	-0.358575	0.014	0.129	7.92235e-12	Antibody-secreting cells
EZH2	5.16897e-16	-0.417493	0.09	0.22	8.14681e-12	Antibody-secreting cells
AKR1A1	5.39784e-16	-0.400539	0.097	0.23	8.50754e-12	Antibody-secreting cells
CHCHD1	5.77961e-16	-0.517048	0.284	0.384	9.10925e-12	Antibody-secreting cells
ELK4	6.45374e-16	-0.319132	0.022	0.139	1.01717e-11	Antibody-secreting cells
RAB4A	6.59851e-16	-0.393681	0.065	0.193	1.03999e-11	Antibody-secreting cells
CUEDC2	7.10992e-16	-0.497705	0.208	0.326	1.12059e-11	Antibody-secreting cells
ENSSSCG00000031659	7.30647e-16	-0.446692	0.104	0.234	1.15157e-11	Antibody-secreting cells
U2SURP	7.54851e-16	-0.522365	0.311	0.408	1.18972e-11	Antibody-secreting cells
RTF1	7.7811e-16	-0.454518	0.158	0.289	1.22638e-11	Antibody-secreting cells
GABARAPL2	8.43836e-16	-0.495857	0.461	0.506	1.32997e-11	Antibody-secreting cells
DNAJC9	9.24087e-16	-0.452095	0.14	0.267	1.45645e-11	Antibody-secreting cells
KIAA0040	9.32855e-16	-0.483044	0.084	0.212	1.47027e-11	Antibody-secreting cells
ENSSSCG00000013453	1.01014e-15	-0.516581	0.262	0.37	1.59208e-11	Antibody-secreting cells
DUSP6	1.02453e-15	-0.357723	0.022	0.137	1.61477e-11	Antibody-secreting cells
POLD2	1.08987e-15	-0.396568	0.066	0.192	1.71775e-11	Antibody-secreting cells
LCK	1.10397e-15	-0.522301	0.151	0.281	1.73997e-11	Antibody-secreting cells
SRSF4	1.11307e-15	-0.507356	0.255	0.361	1.75431e-11	Antibody-secreting cells
CCNB2	1.17833e-15	-0.362111	0.041	0.164	1.85717e-11	Antibody-secreting cells
MFF	1.29632e-15	-0.48297	0.253	0.362	2.04314e-11	Antibody-secreting cells
RSBN1L	1.37188e-15	-0.478521	0.16	0.291	2.16223e-11	Antibody-secreting cells
FAM32A	1.42493e-15	-0.522192	0.438	0.486	2.24583e-11	Antibody-secreting cells
LONP2	1.42777e-15	-0.382479	0.065	0.192	2.25031e-11	Antibody-secreting cells
STIP1	1.5119e-15	-0.497428	0.223	0.341	2.3829e-11	Antibody-secreting cells
SSRP1	1.52381e-15	-0.457934	0.251	0.363	2.40168e-11	Antibody-secreting cells
ENSSSCG00000030478	1.56707e-15	-0.488051	0.226	0.343	2.46985e-11	Antibody-secreting cells
ATAD2	1.64965e-15	-0.423271	0.079	0.206	2.60002e-11	Antibody-secreting cells
STOML2	1.65705e-15	-0.498291	0.364	0.434	2.61167e-11	Antibody-secreting cells
ENSSSCG00000021738	1.90406e-15	-0.489734	0.178	0.298	3.001e-11	Antibody-secreting cells
VEZF1	1.9236e-15	-0.350552	0.038	0.157	3.03179e-11	Antibody-secreting cells
CIRBP	2.27856e-15	-0.541357	0.625	0.592	3.59123e-11	Antibody-secreting cells
ZNF207	2.87548e-15	-0.479866	0.215	0.331	4.53205e-11	Antibody-secreting cells
ENSSSCG00000014031	3.1941e-15	-0.499441	0.359	0.435	5.03422e-11	Antibody-secreting cells
CENPH	3.20325e-15	-0.359985	0.059	0.182	5.04864e-11	Antibody-secreting cells
ZFP36L2	3.30703e-15	-0.652257	0.458	0.51	5.21221e-11	Antibody-secreting cells
CHD9	3.66438e-15	-0.533112	0.167	0.291	5.77542e-11	Antibody-secreting cells
NFYB	4.13657e-15	-0.40877	0.088	0.214	6.51965e-11	Antibody-secreting cells
SNW1	4.34073e-15	-0.516556	0.241	0.346	6.84143e-11	Antibody-secreting cells
CLSPN	4.60325e-15	-0.408627	0.088	0.214	7.25518e-11	Antibody-secreting cells
ENSSSCG00000031169	4.74688e-15	-0.437949	0.156	0.281	7.48155e-11	Antibody-secreting cells
RPS19BP1	4.75552e-15	-0.484146	0.215	0.33	7.49517e-11	Antibody-secreting cells
METAP2	4.761e-15	-0.523116	0.294	0.383	7.50381e-11	Antibody-secreting cells
COPS2	4.77931e-15	-0.505576	0.285	0.38	7.53268e-11	Antibody-secreting cells
ASF1A	4.91028e-15	-0.371515	0.061	0.183	7.73909e-11	Antibody-secreting cells
GPR18	5.03954e-15	-0.415977	0.075	0.2	7.94281e-11	Antibody-secreting cells
MID1IP1	5.04868e-15	-0.494791	0.115	0.242	7.95723e-11	Antibody-secreting cells
RSL1D1	5.31099e-15	-0.462329	0.185	0.306	8.37065e-11	Antibody-secreting cells
ENSSSCG00000010517	5.45052e-15	-0.460891	0.46	0.505	8.59057e-11	Antibody-secreting cells
POU2AF1	5.54836e-15	-0.487813	0.612	0.588	8.74477e-11	Antibody-secreting cells
CD69	5.8048e-15	0.304048	0.646	0.426	9.14894e-11	Antibody-secreting cells
NCAPG	6.07008e-15	-0.340235	0.052	0.174	9.56705e-11	Antibody-secreting cells
SMARCA2	6.4017e-15	-0.339701	0.047	0.167	1.00897e-10	Antibody-secreting cells
BRD4	6.54728e-15	-0.439824	0.14	0.264	1.03192e-10	Antibody-secreting cells
TNFRSF21	6.95785e-15	-0.428425	0.068	0.192	1.09663e-10	Antibody-secreting cells
COMMD5	7.01624e-15	-0.398476	0.097	0.222	1.10583e-10	Antibody-secreting cells
ENSSSCG00000030002	7.28626e-15	-0.534736	0.393	0.445	1.14839e-10	Antibody-secreting cells
SGO2	8.75267e-15	-0.474152	0.072	0.194	1.37951e-10	Antibody-secreting cells
HMMR	9.24879e-15	-0.484947	0.113	0.237	1.4577e-10	Antibody-secreting cells
EML4	9.54058e-15	-0.447624	0.131	0.255	1.50369e-10	Antibody-secreting cells
POLE3	9.73334e-15	-0.481873	0.196	0.31	1.53407e-10	Antibody-secreting cells
RFC4	1.07371e-14	-0.415867	0.124	0.249	1.69227e-10	Antibody-secreting cells
TSPO	1.08257e-14	-0.437168	0.106	0.232	1.70624e-10	Antibody-secreting cells
CBFB	1.10508e-14	-0.418929	0.124	0.248	1.74172e-10	Antibody-secreting cells
PNRC1	1.12025e-14	-0.565056	0.704	0.633	1.76563e-10	Antibody-secreting cells
CDKN2AIPNL	1.15348e-14	-0.47861	0.524	0.526	1.81801e-10	Antibody-secreting cells
PLIN2	1.1686e-14	-0.403929	0.086	0.21	1.84183e-10	Antibody-secreting cells
EXOSC8	1.20612e-14	-0.406379	0.09	0.21	1.90097e-10	Antibody-secreting cells
ASCC1	1.23418e-14	-0.382057	0.068	0.189	1.94519e-10	Antibody-secreting cells
SNAPIN	1.23433e-14	-0.430801	0.11	0.232	1.94542e-10	Antibody-secreting cells
ENSSSCG00000009851	1.50615e-14	-0.454849	0.44	0.491	2.37384e-10	Antibody-secreting cells
ENSSSCG00000000635	1.7221e-14	-0.461189	0.185	0.298	2.71421e-10	Antibody-secreting cells
TOPORS	1.77899e-14	-0.540879	0.26	0.363	2.80387e-10	Antibody-secreting cells
G3BP1	1.78184e-14	-0.474701	0.276	0.378	2.80836e-10	Antibody-secreting cells
CNBP	1.78677e-14	-0.402317	0.738	0.665	2.81614e-10	Antibody-secreting cells
BCAS2	1.79122e-14	-0.5041	0.406	0.462	2.82315e-10	Antibody-secreting cells
ACIN1	1.85322e-14	-0.497222	0.224	0.333	2.92085e-10	Antibody-secreting cells
TXNDC17	2.01497e-14	-0.447866	0.533	0.54	3.1758e-10	Antibody-secreting cells
HCK	2.0466e-14	-0.421109	0.056	0.172	3.22564e-10	Antibody-secreting cells
NR3C1	2.12427e-14	-0.439082	0.111	0.233	3.34806e-10	Antibody-secreting cells
LSM6	2.36221e-14	-0.434822	0.294	0.395	3.72308e-10	Antibody-secreting cells
CGGBP1	2.8659e-14	-0.505197	0.219	0.328	4.51694e-10	Antibody-secreting cells
SQLE	2.95105e-14	-0.566508	0.122	0.242	4.65115e-10	Antibody-secreting cells
SGO1	3.29661e-14	-0.375089	0.065	0.183	5.19579e-10	Antibody-secreting cells
ENSSSCG00000016100	3.42779e-14	-0.43899	0.504	0.518	5.40253e-10	Antibody-secreting cells
ENSSSCG00000017928	3.47164e-14	-0.454435	0.219	0.329	5.47164e-10	Antibody-secreting cells
ENSSSCG00000006179	3.52023e-14	-0.340878	0.034	0.145	5.54824e-10	Antibody-secreting cells
ADH5	3.67491e-14	-0.490628	0.257	0.352	5.79203e-10	Antibody-secreting cells
CDCA8	4.07944e-14	-0.455645	0.092	0.21	6.4296e-10	Antibody-secreting cells
NAPSA	4.14015e-14	-0.339974	0.034	0.145	6.52529e-10	Antibody-secreting cells
VPS36	4.80468e-14	-0.431754	0.113	0.231	7.57265e-10	Antibody-secreting cells
ZNRD1	5.03455e-14	-0.381809	0.099	0.22	7.93495e-10	Antibody-secreting cells
NDUFC2	5.05895e-14	-0.45023	0.506	0.515	7.97341e-10	Antibody-secreting cells
BAG2	5.13912e-14	-0.337329	0.045	0.157	8.09977e-10	Antibody-secreting cells
BCLAF1	5.96165e-14	-0.499811	0.388	0.45	9.39616e-10	Antibody-secreting cells
CD72	6.01407e-14	-0.354651	0.032	0.141	9.47877e-10	Antibody-secreting cells
DLGAP5	6.03575e-14	-0.469062	0.081	0.199	9.51295e-10	Antibody-secreting cells
CCDC50	6.07733e-14	-0.377253	0.472	0.542	9.57848e-10	Antibody-secreting cells
UBLCP1	6.13485e-14	-0.388087	0.086	0.204	9.66914e-10	Antibody-secreting cells
PTPN1	6.54507e-14	-0.480337	0.224	0.335	1.03157e-09	Antibody-secreting cells
TCP1	6.56814e-14	-0.478479	0.276	0.37	1.0352e-09	Antibody-secreting cells
ENSSSCG00000036491	6.803e-14	-0.478551	0.275	0.37	1.07222e-09	Antibody-secreting cells
ENSSSCG00000032556	7.79564e-14	-0.398013	0.765	0.678	1.22867e-09	Antibody-secreting cells
PUF60	7.95658e-14	-0.498236	0.345	0.412	1.25404e-09	Antibody-secreting cells
BTK	8.18213e-14	-0.487229	0.205	0.313	1.28959e-09	Antibody-secreting cells
ZNRF1	8.26858e-14	-0.557989	0.336	0.402	1.30321e-09	Antibody-secreting cells
AIP	8.48403e-14	-0.445268	0.151	0.268	1.33717e-09	Antibody-secreting cells
CASP7	9.29432e-14	-0.300234	0.031	0.138	1.46488e-09	Antibody-secreting cells
RASAL2	9.34676e-14	-0.357571	0.036	0.145	1.47314e-09	Antibody-secreting cells
NCOA7	1.00661e-13	-0.410126	0.054	0.167	1.58652e-09	Antibody-secreting cells
HDAC2	1.01269e-13	-0.455909	0.223	0.328	1.5961e-09	Antibody-secreting cells
CDCA3	1.04234e-13	-0.399228	0.074	0.188	1.64284e-09	Antibody-secreting cells
PSMC3	1.10952e-13	-0.496707	0.352	0.417	1.74872e-09	Antibody-secreting cells
POLH	1.1729e-13	-0.362008	0.057	0.17	1.84861e-09	Antibody-secreting cells
ENSSSCG00000003771	1.18141e-13	-0.473997	0.197	0.305	1.86201e-09	Antibody-secreting cells
NDUFB6	1.21085e-13	-0.458811	0.368	0.433	1.90843e-09	Antibody-secreting cells
NDUFB10	1.23136e-13	-0.469955	0.431	0.467	1.94074e-09	Antibody-secreting cells
ARL6IP6	1.36403e-13	-0.421707	0.144	0.259	2.14985e-09	Antibody-secreting cells
CDK2	1.40581e-13	-0.322109	0.059	0.172	2.2157e-09	Antibody-secreting cells
ENSSSCG00000029066	1.56864e-13	-0.508893	0.221	0.326	2.47234e-09	Antibody-secreting cells
ENSSSCG00000006665	1.59208e-13	-0.462408	0.201	0.305	2.50927e-09	Antibody-secreting cells
USP6NL	1.65718e-13	-0.398432	0.081	0.196	2.61188e-09	Antibody-secreting cells
ARHGAP25	1.7608e-13	-0.497129	0.219	0.321	2.77519e-09	Antibody-secreting cells
ENSSSCG00000038989	1.78808e-13	-0.59065	0.354	0.43	2.8182e-09	Antibody-secreting cells
SNU13	1.88199e-13	-0.432926	0.612	0.573	2.96621e-09	Antibody-secreting cells
CD302	1.89945e-13	-0.440711	0.127	0.246	2.99372e-09	Antibody-secreting cells
ENSSSCG00000011493	2.06206e-13	-0.393184	0.079	0.194	3.25002e-09	Antibody-secreting cells
TRMT112	2.10445e-13	-0.434766	0.627	0.587	3.31682e-09	Antibody-secreting cells
ACAT2	2.29261e-13	-0.368393	0.083	0.199	3.61338e-09	Antibody-secreting cells
COMMD1	2.35409e-13	-0.47252	0.212	0.314	3.71028e-09	Antibody-secreting cells
PRKD3	2.42294e-13	-0.458582	0.136	0.252	3.8188e-09	Antibody-secreting cells
YWHAH	2.93823e-13	-0.485885	0.33	0.399	4.63095e-09	Antibody-secreting cells
ZC3H15	3.00902e-13	-0.505781	0.402	0.448	4.74251e-09	Antibody-secreting cells
COTL1	3.10858e-13	-0.618899	0.275	0.366	4.89943e-09	Antibody-secreting cells
PPIL1	3.38369e-13	-0.414467	0.147	0.259	5.33304e-09	Antibody-secreting cells
CNPY3	3.42594e-13	-0.476795	0.142	0.252	5.39963e-09	Antibody-secreting cells
CPPED1	3.50731e-13	-0.497925	0.219	0.327	5.52788e-09	Antibody-secreting cells
ENSSSCG00000001455	3.67974e-13	-0.628699	0.892	0.777	5.79963e-09	Antibody-secreting cells
SNRNP40	3.72328e-13	-0.385348	0.129	0.243	5.86826e-09	Antibody-secreting cells
DCUN1D5	3.91676e-13	-0.477157	0.223	0.318	6.1732e-09	Antibody-secreting cells
CENPA	3.95615e-13	-0.371815	0.057	0.169	6.23529e-09	Antibody-secreting cells
ENSSSCG00000037775	4.04839e-13	2.69807	0.803	0.895	6.38066e-09	Antibody-secreting cells
KIF2C	4.16371e-13	-0.316909	0.05	0.158	6.56243e-09	Antibody-secreting cells
SMAP1	4.28746e-13	-0.493054	0.268	0.357	6.75747e-09	Antibody-secreting cells
UBE2G1	4.91928e-13	-0.479005	0.336	0.406	7.75327e-09	Antibody-secreting cells
CDKN3	5.66629e-13	-0.427352	0.093	0.206	8.93064e-09	Antibody-secreting cells
GIT2	5.75976e-13	-0.373437	0.081	0.193	9.07795e-09	Antibody-secreting cells
MRPL12	7.0964e-13	-0.484407	0.363	0.416	1.11846e-08	Antibody-secreting cells
ZBTB8OS	7.52528e-13	-0.36276	0.063	0.171	1.18606e-08	Antibody-secreting cells
POLR2K	7.54325e-13	-0.505189	0.409	0.44	1.18889e-08	Antibody-secreting cells
OTUB1	8.0581e-13	-0.38685	0.135	0.246	1.27004e-08	Antibody-secreting cells
GPR174	8.07673e-13	-0.469875	0.079	0.19	1.27297e-08	Antibody-secreting cells
ENSSSCG00000022906	8.63058e-13	-0.43036	0.135	0.245	1.36027e-08	Antibody-secreting cells
ENSSSCG00000026302	9.08229e-13	-0.356852	0.077	0.188	1.43146e-08	Antibody-secreting cells
TP53I11	9.20772e-13	-0.381069	0.061	0.169	1.45123e-08	Antibody-secreting cells
TMEM154	9.20881e-13	-0.498169	0.199	0.301	1.4514e-08	Antibody-secreting cells
ENSSSCG00000007493	9.77876e-13	-0.372896	0.061	0.169	1.54123e-08	Antibody-secreting cells
POC1A	1.02349e-12	-0.2849	0.066	0.176	1.61311e-08	Antibody-secreting cells
NTAN1	1.06307e-12	-0.511942	0.329	0.403	1.6755e-08	Antibody-secreting cells
DAZAP2	1.09383e-12	-0.512624	0.366	0.416	1.72399e-08	Antibody-secreting cells
EIF4A3	1.09566e-12	-0.485954	0.266	0.35	1.72688e-08	Antibody-secreting cells
ID1	1.16291e-12	-0.384069	0.047	0.151	1.83287e-08	Antibody-secreting cells
ENSSSCG00000007749	1.16604e-12	-0.419278	0.208	0.311	1.83779e-08	Antibody-secreting cells
EPSTI1	1.22795e-12	-0.488066	0.135	0.249	1.93538e-08	Antibody-secreting cells
ENSSSCG00000018061	1.24296e-12	-0.508273	0.474	0.488	1.95903e-08	Antibody-secreting cells
ATP5F1C	1.24406e-12	-0.445621	0.449	0.479	1.96077e-08	Antibody-secreting cells
ENSSSCG00000009241	1.30468e-12	-0.453956	0.244	0.336	2.05631e-08	Antibody-secreting cells
KCTD20	1.39175e-12	-0.381753	0.095	0.207	2.19354e-08	Antibody-secreting cells
MICU1	1.42776e-12	-0.446077	0.113	0.223	2.25029e-08	Antibody-secreting cells
SRRM2	1.4851e-12	-0.451849	0.612	0.566	2.34066e-08	Antibody-secreting cells
NDUFS8	1.51093e-12	-0.442794	0.452	0.475	2.38137e-08	Antibody-secreting cells
KIF15	1.77392e-12	-0.258939	0.031	0.129	2.79587e-08	Antibody-secreting cells
CDC45	1.78371e-12	-0.289708	0.048	0.152	2.8113e-08	Antibody-secreting cells
CLNS1A	1.86693e-12	-0.376421	0.133	0.242	2.94246e-08	Antibody-secreting cells
ZNF367	2.32033e-12	-0.304473	0.054	0.158	3.65707e-08	Antibody-secreting cells
EIF2S2	3.29804e-12	-0.402283	0.553	0.547	5.19804e-08	Antibody-secreting cells
EAPP	3.43116e-12	-0.422779	0.136	0.243	5.40786e-08	Antibody-secreting cells
KATNA1	3.74602e-12	-0.385837	0.108	0.214	5.9041e-08	Antibody-secreting cells
C12orf57	3.77049e-12	-0.497086	0.321	0.393	5.94266e-08	Antibody-secreting cells
CTSH	3.90681e-12	-0.477116	0.368	0.435	6.15753e-08	Antibody-secreting cells
RBM14	4.08236e-12	-0.394404	0.138	0.245	6.43421e-08	Antibody-secreting cells
LSM14A	4.33696e-12	-0.454371	0.305	0.382	6.83548e-08	Antibody-secreting cells
PFDN4	4.37361e-12	-0.431114	0.228	0.323	6.89324e-08	Antibody-secreting cells
POLD3	4.52401e-12	-0.299921	0.054	0.155	7.13029e-08	Antibody-secreting cells
FKBP4	4.56559e-12	-0.465589	0.212	0.303	7.19583e-08	Antibody-secreting cells
ENSSSCG00000002004	4.5846e-12	-0.495901	0.463	0.489	7.2258e-08	Antibody-secreting cells
ENSSSCG00000012517	4.915e-12	-0.420844	0.18	0.282	7.74654e-08	Antibody-secreting cells
ENSSSCG00000008677	5.00133e-12	-0.398686	0.106	0.214	7.88259e-08	Antibody-secreting cells
SHCBP1	5.0298e-12	-0.363307	0.135	0.251	7.92747e-08	Antibody-secreting cells
ENSSSCG00000040849	5.07376e-12	1.08063	0.086	0.203	7.99675e-08	Antibody-secreting cells
CBL	5.44574e-12	-0.296656	0.043	0.143	8.58303e-08	Antibody-secreting cells
FOXO1	5.47541e-12	-0.361307	0.066	0.17	8.62979e-08	Antibody-secreting cells
SF3A3	5.76818e-12	-0.396954	0.156	0.259	9.09123e-08	Antibody-secreting cells
MRPL11	5.77084e-12	-0.449714	0.255	0.337	9.09543e-08	Antibody-secreting cells
PCMT1	5.77779e-12	-0.453636	0.302	0.376	9.10637e-08	Antibody-secreting cells
MLLT10	5.7876e-12	-0.300877	0.043	0.142	9.12183e-08	Antibody-secreting cells
CCNB1	5.88355e-12	-0.490727	0.092	0.199	9.27306e-08	Antibody-secreting cells
RBM17	5.92244e-12	-0.359187	0.118	0.227	9.33437e-08	Antibody-secreting cells
TMC6	6.11775e-12	-0.332635	0.05	0.151	9.64219e-08	Antibody-secreting cells
UBE4A	6.38955e-12	-0.449596	0.233	0.324	1.00706e-07	Antibody-secreting cells
MOV10	6.69848e-12	-0.374824	0.108	0.214	1.05575e-07	Antibody-secreting cells
ENSSSCG00000030015	6.7136e-12	-0.378176	0.095	0.2	1.05813e-07	Antibody-secreting cells
TMEM163	7.14148e-12	-0.418952	0.117	0.221	1.12557e-07	Antibody-secreting cells
NDC80	7.24152e-12	-0.320666	0.072	0.177	1.14134e-07	Antibody-secreting cells
TGIF1	7.27155e-12	-0.355502	0.052	0.152	1.14607e-07	Antibody-secreting cells
RASSF4	9.05625e-12	-0.403541	0.115	0.22	1.42736e-07	Antibody-secreting cells
ENSSSCG00000004969	9.12002e-12	-0.36053	0.065	0.166	1.43741e-07	Antibody-secreting cells
PATL1	9.20398e-12	-0.290866	0.045	0.143	1.45064e-07	Antibody-secreting cells
MAPK1	9.27601e-12	-0.387356	0.131	0.235	1.46199e-07	Antibody-secreting cells
HSPA4	9.43907e-12	-0.455476	0.228	0.318	1.48769e-07	Antibody-secreting cells
ENSSSCG00000006418	9.50537e-12	-0.522093	0.061	0.16	1.49814e-07	Antibody-secreting cells
CD2BP2	1.07898e-11	-0.387568	0.106	0.21	1.70057e-07	Antibody-secreting cells
CCT7	1.08192e-11	-0.418881	0.506	0.511	1.70522e-07	Antibody-secreting cells
YTHDC1	1.12912e-11	-0.457797	0.228	0.322	1.77961e-07	Antibody-secreting cells
UBE2C	1.20892e-11	-0.826946	0.221	0.324	1.90538e-07	Antibody-secreting cells
CDC37	1.2292e-11	-0.446474	0.275	0.355	1.93734e-07	Antibody-secreting cells
KDM1B	1.23093e-11	-0.274752	0.034	0.128	1.94008e-07	Antibody-secreting cells
WTAP	1.23678e-11	-0.455466	0.266	0.348	1.94929e-07	Antibody-secreting cells
NUP43	1.24747e-11	-0.258822	0.036	0.13	1.96613e-07	Antibody-secreting cells
GID8	1.25205e-11	-0.414779	0.171	0.271	1.97335e-07	Antibody-secreting cells
FES	1.34187e-11	-0.275421	0.025	0.116	2.11492e-07	Antibody-secreting cells
LYAR	1.40219e-11	-0.405768	0.156	0.262	2.20999e-07	Antibody-secreting cells
SINHCAF	1.52815e-11	-0.290772	0.043	0.14	2.40851e-07	Antibody-secreting cells
RFC5	1.56218e-11	-0.310195	0.079	0.181	2.46215e-07	Antibody-secreting cells
ELOC	1.60781e-11	-0.438322	0.363	0.418	2.53407e-07	Antibody-secreting cells
CKAP5	1.63432e-11	-0.307422	0.056	0.154	2.57585e-07	Antibody-secreting cells
SNRPN	1.68025e-11	-0.432245	0.199	0.299	2.64825e-07	Antibody-secreting cells
THYN1	1.71086e-11	-0.429701	0.226	0.315	2.69649e-07	Antibody-secreting cells
C1orf174	1.71918e-11	-0.405587	0.092	0.193	2.70959e-07	Antibody-secreting cells
MAZ	1.79448e-11	-0.310402	0.083	0.186	2.82828e-07	Antibody-secreting cells
ENSSSCG00000034711	1.81118e-11	-0.323531	0.068	0.17	2.85459e-07	Antibody-secreting cells
ENSSSCG00000012530	1.82947e-11	-0.324921	0.018	0.104	2.88343e-07	Antibody-secreting cells
PSMB4	1.85822e-11	-0.390542	0.483	0.505	2.92874e-07	Antibody-secreting cells
ENSSSCG00000035728	2.10713e-11	-0.446218	0.474	0.479	3.32105e-07	Antibody-secreting cells
MXD3	2.16252e-11	-0.494239	0.124	0.223	3.40834e-07	Antibody-secreting cells
UBE2D2	2.1971e-11	-0.431944	0.205	0.298	3.46285e-07	Antibody-secreting cells
GCN1	2.29997e-11	-0.424978	0.083	0.182	3.62498e-07	Antibody-secreting cells
ENSSSCG00000000273	2.32408e-11	-0.451962	0.521	0.523	3.66298e-07	Antibody-secreting cells
TUT4	2.40308e-11	-0.460706	0.129	0.229	3.7875e-07	Antibody-secreting cells
PRPF19	2.4465e-11	-0.415172	0.196	0.29	3.85592e-07	Antibody-secreting cells
GNAI2	2.51637e-11	-0.469239	0.309	0.373	3.96606e-07	Antibody-secreting cells
ENSSSCG00000032060	2.64849e-11	-0.460302	0.293	0.364	4.17428e-07	Antibody-secreting cells
GPX4	2.72436e-11	-0.510511	0.463	0.465	4.29386e-07	Antibody-secreting cells
MPHOSPH8	2.84128e-11	-0.439968	0.284	0.364	4.47814e-07	Antibody-secreting cells
RAP1GDS1	3.07049e-11	-0.30834	0.068	0.167	4.83941e-07	Antibody-secreting cells
NT5C	3.13225e-11	-0.323476	0.092	0.193	4.93674e-07	Antibody-secreting cells
ENSSSCG00000007203	3.20089e-11	-0.419665	0.206	0.3	5.04493e-07	Antibody-secreting cells
RGS16	3.35549e-11	-0.303628	0.025	0.112	5.28859e-07	Antibody-secreting cells
CCDC59	3.38852e-11	-0.456766	0.221	0.31	5.34064e-07	Antibody-secreting cells
ETS2	3.40878e-11	-0.298031	0.038	0.13	5.37258e-07	Antibody-secreting cells
PTP4A1	3.43631e-11	-0.475363	0.294	0.366	5.41596e-07	Antibody-secreting cells
MEAF6	3.78478e-11	-0.353639	0.088	0.186	5.96519e-07	Antibody-secreting cells
CHURC1	3.78775e-11	-0.346964	0.102	0.204	5.96987e-07	Antibody-secreting cells
PACSIN2	3.79387e-11	-0.362279	0.102	0.204	5.97952e-07	Antibody-secreting cells
ACOT7	4.4104e-11	-0.334017	0.115	0.216	6.95124e-07	Antibody-secreting cells
ENSSSCG00000039107	4.64253e-11	-0.254276	0.041	0.133	7.31708e-07	Antibody-secreting cells
NXT1	4.79336e-11	-0.436282	0.21	0.298	7.55482e-07	Antibody-secreting cells
ENSSSCG00000031288	5.29314e-11	-0.413931	0.16	0.26	8.34253e-07	Antibody-secreting cells
ENSSSCG00000005255	5.7801e-11	-0.403375	0.165	0.266	9.11001e-07	Antibody-secreting cells
PAK2	5.94171e-11	-0.46269	0.329	0.389	9.36473e-07	Antibody-secreting cells
NOLC1	5.9602e-11	-0.447473	0.255	0.339	9.39386e-07	Antibody-secreting cells
WASF2	6.07827e-11	-0.383855	0.12	0.219	9.57996e-07	Antibody-secreting cells
ENSSSCG00000026055	6.08035e-11	-0.281043	0.066	0.164	9.58324e-07	Antibody-secreting cells
MSMO1	6.26918e-11	-0.470546	0.122	0.22	9.88085e-07	Antibody-secreting cells
HMGCS1	6.615e-11	-0.371446	0.084	0.184	1.04259e-06	Antibody-secreting cells
KLHL24	6.6654e-11	-0.337967	0.061	0.157	1.05053e-06	Antibody-secreting cells
UQCRC2	6.76561e-11	-0.41093	0.233	0.318	1.06633e-06	Antibody-secreting cells
RMI2	7.29635e-11	-0.252121	0.027	0.113	1.14998e-06	Antibody-secreting cells
ENSSSCG00000007098	7.56716e-11	-0.298202	0.056	0.149	1.19266e-06	Antibody-secreting cells
LSM7	7.79861e-11	-0.411358	0.203	0.293	1.22914e-06	Antibody-secreting cells
TFEB	7.81397e-11	-0.276124	0.038	0.128	1.23156e-06	Antibody-secreting cells
ENSSSCG00000021200	7.95219e-11	-0.26096	0.041	0.132	1.25335e-06	Antibody-secreting cells
MORF4L1	7.98959e-11	-0.455194	0.418	0.448	1.25924e-06	Antibody-secreting cells
CDC42SE2	8.15073e-11	-0.446542	0.176	0.269	1.28464e-06	Antibody-secreting cells
SUDS3	8.48259e-11	-0.401995	0.149	0.246	1.33694e-06	Antibody-secreting cells
TAF15	8.89058e-11	-0.36108	0.117	0.215	1.40124e-06	Antibody-secreting cells
GPN3	9.36298e-11	-0.349922	0.127	0.226	1.4757e-06	Antibody-secreting cells
TRIB2	9.62886e-11	-0.374597	0.066	0.16	1.51761e-06	Antibody-secreting cells
ENSSSCG00000010795	9.67833e-11	-0.427679	0.363	0.414	1.5254e-06	Antibody-secreting cells
PCM1	1.00078e-10	-0.300886	0.068	0.164	1.57733e-06	Antibody-secreting cells
GMNN	1.04438e-10	-0.478853	0.266	0.337	1.64605e-06	Antibody-secreting cells
CENPN	1.07593e-10	-0.25349	0.056	0.149	1.69578e-06	Antibody-secreting cells
ENSSSCG00000026064	1.08021e-10	-0.539198	0.558	0.521	1.70252e-06	Antibody-secreting cells
ENSSSCG00000016509	1.08062e-10	-0.40071	0.174	0.267	1.70317e-06	Antibody-secreting cells
SNRNP200	1.09048e-10	-0.39417	0.163	0.259	1.7187e-06	Antibody-secreting cells
ITGB1	1.16138e-10	-0.404228	0.126	0.225	1.83045e-06	Antibody-secreting cells
ENSSSCG00000011121	1.21118e-10	-0.41955	0.162	0.255	1.90894e-06	Antibody-secreting cells
ZNF395	1.33013e-10	-0.315038	0.047	0.137	2.09642e-06	Antibody-secreting cells
CAMTA2	1.37517e-10	-0.439752	0.28	0.351	2.1674e-06	Antibody-secreting cells
STRBP	1.43552e-10	-0.310468	0.074	0.169	2.26252e-06	Antibody-secreting cells
HADHA	1.45964e-10	-0.363249	0.158	0.254	2.30054e-06	Antibody-secreting cells
PIP4K2A	1.47618e-10	-0.290002	0.059	0.152	2.3266e-06	Antibody-secreting cells
PPIH	1.56173e-10	-0.409918	0.215	0.301	2.46145e-06	Antibody-secreting cells
PSMC6	1.64842e-10	-0.439214	0.318	0.376	2.59807e-06	Antibody-secreting cells
CENPM	1.65995e-10	-0.334246	0.118	0.215	2.61625e-06	Antibody-secreting cells
YY1	1.69267e-10	-0.369644	0.117	0.213	2.66782e-06	Antibody-secreting cells
PRPS1	1.80281e-10	-0.426421	0.224	0.306	2.84141e-06	Antibody-secreting cells
MRPS31	1.88122e-10	-0.335635	0.093	0.187	2.96499e-06	Antibody-secreting cells
DCUN1D1	1.94633e-10	-0.338331	0.09	0.186	3.06762e-06	Antibody-secreting cells
ESF1	2.05386e-10	-0.417249	0.144	0.239	3.23708e-06	Antibody-secreting cells
DAZAP1	2.1842e-10	-0.383423	0.169	0.261	3.44252e-06	Antibody-secreting cells
LAT2	2.19923e-10	-0.404965	0.68	0.603	3.46621e-06	Antibody-secreting cells
PDCD5	2.25182e-10	-0.417345	0.296	0.363	3.54909e-06	Antibody-secreting cells
RNF8	2.31125e-10	-0.380977	0.106	0.2	3.64276e-06	Antibody-secreting cells
ARHGAP17	2.31477e-10	-0.290128	0.065	0.157	3.64831e-06	Antibody-secreting cells
ENSSSCG00000030122	2.46439e-10	-0.273034	0.056	0.147	3.88413e-06	Antibody-secreting cells
RPRD1B	2.53644e-10	-0.324998	0.061	0.152	3.99768e-06	Antibody-secreting cells
CCNG2	2.56052e-10	-0.399462	0.11	0.203	4.03563e-06	Antibody-secreting cells
RNASEH2A	2.56612e-10	-0.288077	0.07	0.163	4.04446e-06	Antibody-secreting cells
FTL	2.70127e-10	-0.26587	0.966	0.862	4.25747e-06	Antibody-secreting cells
RNF19A	2.72059e-10	-0.503636	0.291	0.358	4.28792e-06	Antibody-secreting cells
ID2	2.8007e-10	-0.519407	0.201	0.299	4.41418e-06	Antibody-secreting cells
PCBP2	2.862e-10	-0.458706	0.32	0.372	4.5108e-06	Antibody-secreting cells
DTNBP1	3.0133e-10	-0.304189	0.059	0.15	4.74927e-06	Antibody-secreting cells
SYNGR2	3.02462e-10	-0.555515	0.334	0.383	4.7671e-06	Antibody-secreting cells
SDHAF2	3.04927e-10	-0.375989	0.165	0.259	4.80596e-06	Antibody-secreting cells
REX1BD	3.08002e-10	-0.449289	0.357	0.403	4.85443e-06	Antibody-secreting cells
MCM5	3.12433e-10	-0.275681	0.061	0.151	4.92425e-06	Antibody-secreting cells
ASPM	3.17284e-10	-0.287107	0.031	0.114	5.00072e-06	Antibody-secreting cells
TSR1	3.22203e-10	-0.297531	0.054	0.143	5.07824e-06	Antibody-secreting cells
EIF3F	3.2462e-10	-0.316825	0.11	0.205	5.11633e-06	Antibody-secreting cells
ANXA11	3.38821e-10	-0.389621	0.142	0.235	5.34015e-06	Antibody-secreting cells
TRA2A	3.54023e-10	-0.414479	0.18	0.269	5.57976e-06	Antibody-secreting cells
HIST1H2AG	3.58454e-10	-0.375195	0.181	0.281	5.64959e-06	Antibody-secreting cells
RABGAP1	3.60081e-10	-0.284709	0.038	0.122	5.67524e-06	Antibody-secreting cells
MEF2C	3.60741e-10	-0.436187	0.535	0.522	5.68564e-06	Antibody-secreting cells
BBS7	3.78265e-10	-0.316159	0.09	0.183	5.96183e-06	Antibody-secreting cells
NIFK	3.80581e-10	-0.423576	0.235	0.315	5.99833e-06	Antibody-secreting cells
CD3EAP	3.95855e-10	-0.277056	0.045	0.133	6.23907e-06	Antibody-secreting cells
MBD4	4.08353e-10	-0.326825	0.075	0.167	6.43605e-06	Antibody-secreting cells
FAAP24	4.3575e-10	-0.261726	0.052	0.14	6.86785e-06	Antibody-secreting cells
KNSTRN	4.40297e-10	-0.314428	0.056	0.143	6.93952e-06	Antibody-secreting cells
DUSP2	4.72566e-10	-0.343404	0.059	0.15	7.44811e-06	Antibody-secreting cells
RPRD1A	4.75756e-10	-0.308013	0.066	0.157	7.49839e-06	Antibody-secreting cells
ENSSSCG00000032946	4.79503e-10	-0.278259	0.054	0.142	7.55745e-06	Antibody-secreting cells
ENSSSCG00000022912	5.05619e-10	-0.49403	0.35	0.388	7.96906e-06	Antibody-secreting cells
RPL7L1	5.4805e-10	-0.429285	0.384	0.421	8.63782e-06	Antibody-secreting cells
CCR7	5.63402e-10	-0.67952	0.034	0.116	8.87978e-06	Antibody-secreting cells
PPP4R3B	5.74086e-10	-0.412269	0.23	0.313	9.04817e-06	Antibody-secreting cells
DHX15	5.76417e-10	-0.336571	0.127	0.222	9.08491e-06	Antibody-secreting cells
ENSSSCG00000040782	5.90443e-10	-0.431076	0.251	0.322	9.30598e-06	Antibody-secreting cells
MED11	6.26e-10	-0.314745	0.068	0.157	9.86638e-06	Antibody-secreting cells
MICAL1	6.44886e-10	-0.333342	0.072	0.161	1.0164e-05	Antibody-secreting cells
ENSSSCG00000001505	6.51105e-10	-0.436832	0.348	0.397	1.02621e-05	Antibody-secreting cells
SEPT1	7.05604e-10	-0.479889	0.472	0.469	1.1121e-05	Antibody-secreting cells
ENSSSCG00000007253	7.19046e-10	-0.40627	0.239	0.318	1.13329e-05	Antibody-secreting cells
LSP1	8.06692e-10	-0.406115	0.637	0.589	1.27143e-05	Antibody-secreting cells
AK6	8.09697e-10	-0.39067	0.16	0.249	1.27616e-05	Antibody-secreting cells
XPO1	8.17114e-10	-0.325447	0.106	0.198	1.28785e-05	Antibody-secreting cells
MTCH1	8.45031e-10	-0.39524	0.192	0.277	1.33185e-05	Antibody-secreting cells
MNAT1	8.79153e-10	-0.347798	0.101	0.194	1.38563e-05	Antibody-secreting cells
PSMB10	8.80154e-10	-0.409388	0.176	0.263	1.38721e-05	Antibody-secreting cells
ELF1	8.98479e-10	-0.47027	0.348	0.395	1.41609e-05	Antibody-secreting cells
RFXANK	9.49672e-10	-0.442719	0.273	0.341	1.49678e-05	Antibody-secreting cells
COMMD2	9.63444e-10	-0.377443	0.144	0.232	1.51848e-05	Antibody-secreting cells
BYSL	1.01434e-09	-0.313725	0.086	0.176	1.5987e-05	Antibody-secreting cells
UBC	1.01549e-09	-0.336309	0.833	0.74	1.60051e-05	Antibody-secreting cells
CBLB	1.02206e-09	-0.296249	0.048	0.133	1.61088e-05	Antibody-secreting cells
RNPEP	1.03576e-09	-0.277864	0.088	0.179	1.63247e-05	Antibody-secreting cells
MAST4	1.06213e-09	-0.296458	0.041	0.124	1.67403e-05	Antibody-secreting cells
PFDN1	1.07248e-09	-0.425563	0.266	0.336	1.69034e-05	Antibody-secreting cells
DDX50	1.07686e-09	-0.284883	0.068	0.156	1.69724e-05	Antibody-secreting cells
EIF3A	1.08433e-09	-0.394315	0.461	0.475	1.70901e-05	Antibody-secreting cells
FAM160B1	1.08786e-09	-0.438389	0.163	0.248	1.71458e-05	Antibody-secreting cells
TIMM9	1.09511e-09	-0.365366	0.165	0.256	1.726e-05	Antibody-secreting cells
ENSSSCG00000016323	1.13995e-09	-0.37742	0.167	0.255	1.79668e-05	Antibody-secreting cells
TLN1	1.17903e-09	-0.397493	0.196	0.282	1.85827e-05	Antibody-secreting cells
UIMC1	1.22767e-09	-0.305848	0.059	0.145	1.93493e-05	Antibody-secreting cells
SKA2	1.23096e-09	-0.359897	0.142	0.233	1.94011e-05	Antibody-secreting cells
DNAJC2	1.31541e-09	-0.425511	0.271	0.34	2.07322e-05	Antibody-secreting cells
BRD9	1.35666e-09	-0.401755	0.158	0.245	2.13823e-05	Antibody-secreting cells
CGAS	1.36887e-09	-0.302031	0.077	0.166	2.15748e-05	Antibody-secreting cells
SLTM	1.44181e-09	-0.394123	0.189	0.276	2.27244e-05	Antibody-secreting cells
HAUS1	1.48956e-09	-0.315035	0.086	0.174	2.3477e-05	Antibody-secreting cells
ENSSSCG00000014414	1.51136e-09	-0.354983	0.136	0.226	2.38205e-05	Antibody-secreting cells
DGKZ	1.64028e-09	-0.262778	0.066	0.155	2.58525e-05	Antibody-secreting cells
ARMC1	1.64712e-09	-0.292694	0.083	0.172	2.59603e-05	Antibody-secreting cells
ENSSSCG00000011764	1.66523e-09	-0.409526	0.488	0.476	2.62457e-05	Antibody-secreting cells
MTMR12	1.67515e-09	-0.254895	0.036	0.116	2.6402e-05	Antibody-secreting cells
U2AF2	1.69726e-09	-0.398282	0.187	0.269	2.67506e-05	Antibody-secreting cells
AGO2	1.83996e-09	-0.355602	0.079	0.166	2.89997e-05	Antibody-secreting cells
ENSSSCG00000023126	1.87753e-09	-0.374006	0.154	0.243	2.95917e-05	Antibody-secreting cells
ENSSSCG00000000611	1.9466e-09	-0.407191	0.241	0.313	3.06804e-05	Antibody-secreting cells
CENPQ	2.08516e-09	-0.274966	0.068	0.155	3.28642e-05	Antibody-secreting cells
NOL8	2.15062e-09	-0.337256	0.093	0.181	3.38959e-05	Antibody-secreting cells
GM2A	2.17652e-09	-0.335384	0.086	0.175	3.43041e-05	Antibody-secreting cells
STK4	2.23115e-09	-0.410095	0.253	0.326	3.51652e-05	Antibody-secreting cells
MRPS23	2.26503e-09	-0.358415	0.144	0.229	3.56992e-05	Antibody-secreting cells
GTF2F2	2.39719e-09	-0.403973	0.223	0.301	3.77821e-05	Antibody-secreting cells
PPIG	2.5344e-09	-0.444631	0.355	0.394	3.99447e-05	Antibody-secreting cells
CAMLG	2.61919e-09	-0.413029	0.167	0.251	4.12811e-05	Antibody-secreting cells
TRAF3IP3	2.69183e-09	-0.462846	0.346	0.389	4.24259e-05	Antibody-secreting cells
UBE2B	2.69691e-09	-0.48443	0.424	0.436	4.25059e-05	Antibody-secreting cells
RALBP1	2.71544e-09	-0.390037	0.278	0.346	4.27981e-05	Antibody-secreting cells
MRPS25	2.72536e-09	-0.387233	0.221	0.299	4.29544e-05	Antibody-secreting cells
STK17B	2.75141e-09	-0.458545	0.393	0.423	4.3365e-05	Antibody-secreting cells
RIN3	2.77858e-09	-0.259536	0.036	0.114	4.37931e-05	Antibody-secreting cells
TRAPPC4	2.79565e-09	-0.313447	0.088	0.176	4.40622e-05	Antibody-secreting cells
MBIP	2.82309e-09	-0.330886	0.081	0.166	4.44947e-05	Antibody-secreting cells
ENSSSCG00000002449	2.82816e-09	-0.449177	0.479	0.47	4.45746e-05	Antibody-secreting cells
DIABLO	2.8703e-09	-0.380885	0.203	0.282	4.52387e-05	Antibody-secreting cells
SLC25A36	2.89666e-09	-0.429935	0.178	0.261	4.56542e-05	Antibody-secreting cells
ENSSSCG00000033786	3.03163e-09	-0.252989	0.056	0.138	4.77815e-05	Antibody-secreting cells
UFD1	3.09713e-09	-0.394199	0.239	0.311	4.88139e-05	Antibody-secreting cells
NAA16	3.22448e-09	-0.307865	0.075	0.162	5.08211e-05	Antibody-secreting cells
CCNDBP1	3.24226e-09	-0.39162	0.136	0.221	5.11013e-05	Antibody-secreting cells
FIBP	3.25984e-09	-0.362288	0.163	0.248	5.13784e-05	Antibody-secreting cells
MUTYH	3.30465e-09	-0.251229	0.059	0.143	5.20845e-05	Antibody-secreting cells
ENSSSCG00000039612	3.53677e-09	-0.363083	0.181	0.265	5.5743e-05	Antibody-secreting cells
RAD17	3.54943e-09	-0.280649	0.052	0.134	5.59426e-05	Antibody-secreting cells
CARHSP1	3.55512e-09	-0.416709	0.323	0.374	5.60322e-05	Antibody-secreting cells
ATP6V1D	3.67917e-09	-0.380357	0.138	0.223	5.79874e-05	Antibody-secreting cells
PSMD13	3.84096e-09	-0.420834	0.296	0.352	6.05374e-05	Antibody-secreting cells
DYRK3	3.84806e-09	-0.463298	0.197	0.276	6.06493e-05	Antibody-secreting cells
PRDX6	3.89235e-09	-0.377999	0.165	0.249	6.13474e-05	Antibody-secreting cells
ORC6	4.09269e-09	-0.333569	0.138	0.224	6.45049e-05	Antibody-secreting cells
ENSSSCG00000027085	4.1089e-09	-0.410958	0.402	0.425	6.47604e-05	Antibody-secreting cells
ENSSSCG00000012654	4.17765e-09	-0.31209	0.093	0.181	6.58439e-05	Antibody-secreting cells
MCM2	4.28784e-09	-0.258653	0.065	0.149	6.75807e-05	Antibody-secreting cells
SLBP	4.45008e-09	-0.353929	0.126	0.209	7.01376e-05	Antibody-secreting cells
ABI1	4.5317e-09	-0.396024	0.163	0.245	7.14242e-05	Antibody-secreting cells
PRPF3	4.61166e-09	-0.339737	0.095	0.18	7.26844e-05	Antibody-secreting cells
ENSSSCG00000038444	4.63041e-09	-0.442328	0.436	0.444	7.29799e-05	Antibody-secreting cells
UPF3B	4.74929e-09	-0.322379	0.102	0.19	7.48535e-05	Antibody-secreting cells
CCDC34	4.79996e-09	-0.275724	0.077	0.161	7.56521e-05	Antibody-secreting cells
ENSSSCG00000033037	4.8364e-09	-0.368693	0.111	0.198	7.62265e-05	Antibody-secreting cells
FAM76A	4.92824e-09	-0.273993	0.066	0.152	7.7674e-05	Antibody-secreting cells
IQGAP1	5.13709e-09	-0.370885	0.144	0.229	8.09656e-05	Antibody-secreting cells
VTA1	5.32714e-09	-0.354778	0.133	0.217	8.39611e-05	Antibody-secreting cells
SBNO1	5.38643e-09	-0.374408	0.149	0.233	8.48955e-05	Antibody-secreting cells
MALT1	5.45789e-09	-0.265037	0.038	0.114	8.60218e-05	Antibody-secreting cells
ENSSSCG00000038403	5.72786e-09	-0.281475	0.054	0.134	9.02768e-05	Antibody-secreting cells
ENSSSCG00000034913	5.84888e-09	-0.257495	0.086	0.172	9.21843e-05	Antibody-secreting cells
C15orf48	5.89218e-09	-0.446896	0.142	0.23	9.28667e-05	Antibody-secreting cells
CEBPZ	6.16193e-09	-0.363438	0.129	0.214	9.71181e-05	Antibody-secreting cells
LY9	6.27397e-09	-0.332102	0.086	0.17	9.8884e-05	Antibody-secreting cells
PRELID1	6.39285e-09	-0.40026	0.346	0.389	0.000100758	Antibody-secreting cells
ENSSSCG00000034990	6.76561e-09	-0.284156	0.045	0.123	0.000106633	Antibody-secreting cells
ENSSSCG00000035908	6.78869e-09	-0.255801	0.05	0.129	0.000106997	Antibody-secreting cells
NDUFS4	7.01692e-09	-0.405054	0.388	0.417	0.000110594	Antibody-secreting cells
MBD2	7.05401e-09	-0.354199	0.149	0.231	0.000111178	Antibody-secreting cells
SUPT4H1	7.27337e-09	-0.461388	0.494	0.476	0.000114636	Antibody-secreting cells
WAPL	7.61654e-09	-0.367675	0.156	0.239	0.000120044	Antibody-secreting cells
ANGPTL4	7.80022e-09	-0.436441	0.129	0.211	0.000122939	Antibody-secreting cells
ENSSSCG00000016970	8.02995e-09	-0.395906	0.223	0.294	0.00012656	Antibody-secreting cells
UBE3A	8.03374e-09	-0.33278	0.106	0.191	0.00012662	Antibody-secreting cells
CRLF3	8.27452e-09	-0.415344	0.201	0.275	0.000130415	Antibody-secreting cells
CAPRIN1	8.38737e-09	-0.391782	0.237	0.304	0.000132193	Antibody-secreting cells
ARHGAP9	8.55322e-09	-0.321123	0.083	0.165	0.000134807	Antibody-secreting cells
PDK3	8.76242e-09	-0.250875	0.047	0.125	0.000138105	Antibody-secreting cells
ENSSSCG00000008383	8.84312e-09	-0.352837	0.14	0.225	0.000139376	Antibody-secreting cells
WASHC3	8.94018e-09	-0.372335	0.189	0.267	0.000140906	Antibody-secreting cells
EXOSC1	9.325e-09	-0.331121	0.113	0.197	0.000146971	Antibody-secreting cells
CTNNBL1	9.46349e-09	-0.294902	0.081	0.164	0.000149154	Antibody-secreting cells
DDX21	9.69422e-09	-0.450665	0.338	0.38	0.000152791	Antibody-secreting cells
DNAJB1	9.8102e-09	0.347615	0.567	0.41	0.000154619	Antibody-secreting cells
SRSF9	9.84183e-09	-0.395773	0.237	0.305	0.000155117	Antibody-secreting cells
TBCC	9.94647e-09	-0.317532	0.075	0.157	0.000156766	Antibody-secreting cells
NDUFA1	1.01895e-08	-0.414285	0.47	0.461	0.000160597	Antibody-secreting cells
RPP21	1.09111e-08	-0.333662	0.151	0.234	0.00017197	Antibody-secreting cells
ZNF146	1.15758e-08	-0.335298	0.111	0.195	0.000182447	Antibody-secreting cells
IMP4	1.19383e-08	-0.391575	0.312	0.363	0.00018816	Antibody-secreting cells
MIS18BP1	1.24982e-08	-0.396024	0.246	0.317	0.000196983	Antibody-secreting cells
CENPU	1.25572e-08	-0.265302	0.079	0.162	0.000197914	Antibody-secreting cells
DDX6	1.2675e-08	-0.395787	0.201	0.278	0.00019977	Antibody-secreting cells
UCK1	1.35913e-08	-0.309161	0.083	0.165	0.000214212	Antibody-secreting cells
ENSSSCG00000009633	1.4143e-08	-0.470302	0.255	0.316	0.000222909	Antibody-secreting cells
ENSSSCG00000014094	1.45544e-08	-0.392536	0.178	0.255	0.000229393	Antibody-secreting cells
EPB41	1.46096e-08	-0.335238	0.135	0.219	0.000230262	Antibody-secreting cells
ENSSSCG00000016376	1.46955e-08	-0.320907	0.102	0.185	0.000231616	Antibody-secreting cells
TKFC	1.50927e-08	-0.260457	0.057	0.136	0.000237877	Antibody-secreting cells
TMEM242	1.63577e-08	-0.260428	0.041	0.115	0.000257814	Antibody-secreting cells
NOP58	1.63694e-08	-0.429897	0.348	0.385	0.000257998	Antibody-secreting cells
LENG1	1.64435e-08	-0.282289	0.066	0.146	0.000259166	Antibody-secreting cells
PTBP3	1.74543e-08	-0.400973	0.377	0.412	0.000275098	Antibody-secreting cells
THOC5	1.92485e-08	-0.331685	0.118	0.2	0.000303376	Antibody-secreting cells
CDC42SE1	1.9608e-08	-0.376148	0.163	0.243	0.000309041	Antibody-secreting cells
DCAF8	1.98765e-08	-0.338656	0.12	0.203	0.000313274	Antibody-secreting cells
STRAP	1.99234e-08	-0.394236	0.232	0.299	0.000314013	Antibody-secreting cells
HLTF	2.04742e-08	-0.305963	0.118	0.202	0.000322693	Antibody-secreting cells
CYP51A1	2.08826e-08	-0.428579	0.147	0.226	0.00032913	Antibody-secreting cells
RFC3	2.10071e-08	-0.370551	0.275	0.338	0.000331093	Antibody-secreting cells
CYBC1	2.19276e-08	-0.429012	0.345	0.381	0.0003456	Antibody-secreting cells
SUSD6	2.26571e-08	-0.359032	0.088	0.167	0.000357099	Antibody-secreting cells
PHACTR1	2.28491e-08	-0.54019	0.147	0.224	0.000360125	Antibody-secreting cells
KRCC1	2.29766e-08	-0.281278	0.054	0.131	0.000362134	Antibody-secreting cells
STK26	2.30036e-08	-0.347521	0.124	0.204	0.000362559	Antibody-secreting cells
NDUFA6	2.3563e-08	-0.424428	0.4	0.411	0.000371376	Antibody-secreting cells
RUVBL2	2.4692e-08	-0.280944	0.108	0.191	0.00038917	Antibody-secreting cells
TPRKB	2.68569e-08	-0.314242	0.11	0.189	0.000423292	Antibody-secreting cells
ENSSSCG00000008183	2.70425e-08	-0.390633	0.241	0.303	0.000426217	Antibody-secreting cells
FXR1	2.75481e-08	-0.437113	0.28	0.332	0.000434186	Antibody-secreting cells
DDX23	2.75503e-08	-0.322381	0.122	0.203	0.00043422	Antibody-secreting cells
CXXC1	2.82094e-08	-0.362561	0.158	0.235	0.000444608	Antibody-secreting cells
PHAX	2.85706e-08	-0.335848	0.144	0.223	0.000450301	Antibody-secreting cells
CDK9	2.87081e-08	-0.341783	0.147	0.227	0.000452469	Antibody-secreting cells
FBL	2.88023e-08	-0.351134	0.174	0.253	0.000453953	Antibody-secreting cells
IVNS1ABP	2.93067e-08	-0.422587	0.183	0.258	0.000461902	Antibody-secreting cells
MDH1	3.16779e-08	-0.33794	0.329	0.387	0.000499276	Antibody-secreting cells
PNISR	3.23637e-08	-0.448505	0.539	0.504	0.000510084	Antibody-secreting cells
ATXN10	3.44272e-08	-0.313405	0.122	0.201	0.000542607	Antibody-secreting cells
BPGM	3.56386e-08	-0.322819	0.084	0.163	0.000561701	Antibody-secreting cells
ENSSSCG00000036483	3.82473e-08	-0.365242	0.165	0.242	0.000602816	Antibody-secreting cells
PSMG3	4.10348e-08	-0.28091	0.09	0.169	0.000646749	Antibody-secreting cells
CEP295	4.71465e-08	-0.301381	0.095	0.174	0.000743076	Antibody-secreting cells
ALKBH7	4.93249e-08	-0.290081	0.106	0.186	0.000777409	Antibody-secreting cells
APPL1	4.93288e-08	-0.299772	0.093	0.172	0.000777472	Antibody-secreting cells
FCF1	4.9633e-08	-0.310367	0.101	0.178	0.000782266	Antibody-secreting cells
CENPS	5.18511e-08	-0.315556	0.136	0.215	0.000817225	Antibody-secreting cells
AFMID	5.79099e-08	-0.350905	0.129	0.207	0.000912718	Antibody-secreting cells
ZBTB44	5.87032e-08	-0.252537	0.05	0.122	0.000925221	Antibody-secreting cells
USP8	5.92683e-08	-0.367884	0.165	0.241	0.000934128	Antibody-secreting cells
YAF2	6.26681e-08	-0.292447	0.093	0.171	0.000987713	Antibody-secreting cells
ENSSSCG00000006628	6.40278e-08	-0.401153	0.278	0.331	0.00100914	Antibody-secreting cells
ZMAT5	6.62572e-08	-0.273721	0.09	0.167	0.00104428	Antibody-secreting cells
SREK1	6.6844e-08	-0.40656	0.293	0.345	0.00105353	Antibody-secreting cells
ENSSSCG00000005518	6.71066e-08	-0.287401	0.056	0.128	0.00105767	Antibody-secreting cells
CAT	6.76581e-08	-0.259201	0.074	0.149	0.00106636	Antibody-secreting cells
CPNE1	6.77659e-08	-0.344658	0.154	0.231	0.00106806	Antibody-secreting cells
NUB1	6.78196e-08	-0.403947	0.187	0.256	0.0010689	Antibody-secreting cells
CCDC25	6.98488e-08	-0.380812	0.271	0.328	0.00110089	Antibody-secreting cells
CYFIP2	7.13182e-08	-0.318714	0.124	0.202	0.00112405	Antibody-secreting cells
HADHB	7.19027e-08	-0.38176	0.228	0.295	0.00113326	Antibody-secreting cells
CHCHD3	7.19028e-08	-0.357423	0.197	0.268	0.00113326	Antibody-secreting cells
CDK6	7.41414e-08	-0.363386	0.083	0.158	0.00116854	Antibody-secreting cells
ARF5	7.49547e-08	-0.253165	0.068	0.142	0.00118136	Antibody-secreting cells
STXBP3	7.52879e-08	-0.440519	0.359	0.388	0.00118661	Antibody-secreting cells
ENSSSCG00000008035	7.71614e-08	-0.29935	0.14	0.219	0.00121614	Antibody-secreting cells
ENSSSCG00000012382	7.7844e-08	-0.391302	0.194	0.262	0.0012269	Antibody-secreting cells
WDR41	7.80355e-08	-0.2616	0.066	0.14	0.00122992	Antibody-secreting cells
SYNCRIP	8.08949e-08	-0.381666	0.244	0.306	0.00127498	Antibody-secreting cells
MED21	8.16016e-08	-0.369523	0.205	0.273	0.00128612	Antibody-secreting cells
AGFG1	8.19411e-08	-0.2511	0.081	0.158	0.00129147	Antibody-secreting cells
NACC1	8.41337e-08	-0.262438	0.074	0.15	0.00132603	Antibody-secreting cells
MAK16	9.04566e-08	-0.397629	0.214	0.281	0.00142569	Antibody-secreting cells
IRF3	9.15418e-08	-0.412627	0.16	0.231	0.00144279	Antibody-secreting cells
ZNF800	9.66535e-08	-0.293307	0.09	0.165	0.00152336	Antibody-secreting cells
CBX1	9.76054e-08	-0.262659	0.066	0.139	0.00153836	Antibody-secreting cells
SS18	9.76378e-08	-0.31138	0.127	0.205	0.00153887	Antibody-secreting cells
ENSSSCG00000011917	9.79582e-08	-0.339369	0.172	0.245	0.00154392	Antibody-secreting cells
MDFIC	1.00103e-07	-0.372894	0.136	0.21	0.00157773	Antibody-secreting cells
SPTSSA	1.00442e-07	-0.349696	0.183	0.254	0.00158307	Antibody-secreting cells
OARD1	1.0055e-07	-0.293807	0.099	0.175	0.00158477	Antibody-secreting cells
FABP3	1.00574e-07	-0.353133	0.158	0.234	0.00158515	Antibody-secreting cells
OGA	1.01467e-07	-0.338743	0.138	0.216	0.00159922	Antibody-secreting cells
C9orf78	1.02203e-07	-0.359045	0.16	0.233	0.00161082	Antibody-secreting cells
CAMK2D	1.04592e-07	-0.309341	0.088	0.165	0.00164848	Antibody-secreting cells
ARRDC2	1.10382e-07	-0.262698	0.061	0.134	0.00173973	Antibody-secreting cells
ENSSSCG00000027565	1.13422e-07	-0.385572	0.194	0.266	0.00178764	Antibody-secreting cells
ZNF580	1.13715e-07	-0.387671	0.21	0.275	0.00179226	Antibody-secreting cells
SDCBP	1.17666e-07	-0.387485	0.282	0.337	0.00185453	Antibody-secreting cells
ZNF277	1.18108e-07	-0.382139	0.149	0.22	0.0018615	Antibody-secreting cells
SELENOH	1.18131e-07	-0.411442	0.273	0.323	0.00186186	Antibody-secreting cells
SRRT	1.2867e-07	-0.25664	0.102	0.18	0.00202797	Antibody-secreting cells
PPP2R5A	1.40925e-07	-0.275094	0.075	0.149	0.00222112	Antibody-secreting cells
NDUFAF4	1.46201e-07	-0.271443	0.065	0.136	0.00230427	Antibody-secreting cells
MED25	1.46295e-07	-0.297623	0.075	0.148	0.00230576	Antibody-secreting cells
GTF2A1	1.46362e-07	-0.262003	0.072	0.145	0.00230681	Antibody-secreting cells
ANGPTL1	1.48668e-07	-0.493815	0.26	0.312	0.00234315	Antibody-secreting cells
PSMB6	1.49529e-07	-0.346769	0.555	0.518	0.00235673	Antibody-secreting cells
THUMPD1	1.50629e-07	-0.337655	0.151	0.225	0.00237406	Antibody-secreting cells
PABPN1	1.51173e-07	-0.370176	0.214	0.277	0.00238263	Antibody-secreting cells
ATF7IP	1.54202e-07	-0.307897	0.088	0.162	0.00243038	Antibody-secreting cells
RNF7	1.58982e-07	-0.388865	0.345	0.379	0.00250572	Antibody-secreting cells
ENSSSCG00000006260	1.60232e-07	-0.40586	0.271	0.319	0.00252542	Antibody-secreting cells
USF1	1.62841e-07	-0.382782	0.158	0.228	0.00256654	Antibody-secreting cells
C12orf49	1.67533e-07	-0.285563	0.086	0.161	0.0026405	Antibody-secreting cells
BLOC1S1	1.68608e-07	-0.351053	0.199	0.269	0.00265742	Antibody-secreting cells
GSE1	1.70355e-07	-0.303831	0.09	0.163	0.00268497	Antibody-secreting cells
ENSSSCG00000022176	1.71414e-07	-0.29837	0.079	0.151	0.00270166	Antibody-secreting cells
PHIP	1.71605e-07	-0.322458	0.135	0.21	0.00270466	Antibody-secreting cells
ENSSSCG00000031023	1.77012e-07	-0.548873	0.226	0.294	0.00278989	Antibody-secreting cells
TMEM11	1.89533e-07	-0.349809	0.199	0.268	0.00298723	Antibody-secreting cells
RTF2	1.91225e-07	-0.371763	0.226	0.289	0.00301389	Antibody-secreting cells
PLEKHF2	1.98591e-07	-0.436786	0.298	0.34	0.00312999	Antibody-secreting cells
PSMA3	2.01749e-07	-0.348396	0.494	0.488	0.00317976	Antibody-secreting cells
MRPL39	2.11577e-07	-0.329218	0.162	0.232	0.00333467	Antibody-secreting cells
DENND2D	2.23249e-07	-0.32074	0.11	0.181	0.00351863	Antibody-secreting cells
ANAPC13	2.26126e-07	-0.409345	0.384	0.396	0.00356397	Antibody-secreting cells
PPM1G	2.2988e-07	-0.330584	0.181	0.251	0.00362313	Antibody-secreting cells
ENSSSCG00000032311	2.39156e-07	-0.260076	0.101	0.176	0.00376934	Antibody-secreting cells
MED4	2.40677e-07	-0.381987	0.181	0.248	0.00379331	Antibody-secreting cells
ENSSSCG00000033814	2.41064e-07	-0.386992	0.205	0.266	0.00379941	Antibody-secreting cells
CEP192	2.47317e-07	-0.314533	0.136	0.209	0.00389796	Antibody-secreting cells
NUP50	2.51137e-07	-0.379735	0.271	0.322	0.00395818	Antibody-secreting cells
TFAM	2.66255e-07	-0.32757	0.154	0.226	0.00419644	Antibody-secreting cells
DYRK1A	2.68608e-07	-0.278377	0.084	0.157	0.00423353	Antibody-secreting cells
CDCA7L	2.8061e-07	-0.315405	0.11	0.182	0.0044227	Antibody-secreting cells
HNRNPH2	2.86147e-07	-0.341358	0.145	0.217	0.00450997	Antibody-secreting cells
ENSSSCG00000023324	2.95556e-07	-0.298583	0.092	0.165	0.00465825	Antibody-secreting cells
ENSSSCG00000010685	2.95761e-07	-0.394505	0.32	0.354	0.00466148	Antibody-secreting cells
SRSF6	2.96548e-07	-0.397499	0.497	0.475	0.00467389	Antibody-secreting cells
MAP2K1	2.97239e-07	-0.320092	0.097	0.168	0.00468479	Antibody-secreting cells
EMC8	3.13396e-07	-0.34028	0.162	0.231	0.00493944	Antibody-secreting cells
EMD	3.15039e-07	-0.419933	0.345	0.371	0.00496533	Antibody-secreting cells
BRI3BP	3.21802e-07	-0.262073	0.084	0.155	0.00507193	Antibody-secreting cells
UTP3	3.31131e-07	-0.308173	0.099	0.171	0.00521896	Antibody-secreting cells
XPA	3.40934e-07	-0.279486	0.068	0.137	0.00537347	Antibody-secreting cells
REV1	3.66248e-07	-0.296819	0.09	0.161	0.00577243	Antibody-secreting cells
ECHS1	3.6748e-07	-0.355186	0.478	0.466	0.00579184	Antibody-secreting cells
THOC1	3.68857e-07	-0.250212	0.063	0.13	0.00581355	Antibody-secreting cells
MTHFD1	3.7535e-07	-0.258513	0.088	0.159	0.00591589	Antibody-secreting cells
PDAP1	3.79342e-07	-0.395783	0.332	0.364	0.00597881	Antibody-secreting cells
POLG	4.01427e-07	-0.324949	0.11	0.18	0.00632689	Antibody-secreting cells
SDHD	4.06916e-07	-0.39846	0.334	0.363	0.0064134	Antibody-secreting cells
FKBP8	4.07259e-07	-0.278759	0.101	0.172	0.00641881	Antibody-secreting cells
TNFAIP8	4.2127e-07	-0.383497	0.542	0.516	0.00663964	Antibody-secreting cells
FDFT1	4.4587e-07	-0.299738	0.11	0.18	0.00702735	Antibody-secreting cells
ESCO1	4.57009e-07	-0.289187	0.093	0.164	0.00720292	Antibody-secreting cells
ARL6IP5	4.61463e-07	-0.438704	0.215	0.273	0.00727312	Antibody-secreting cells
KIF2A	4.64774e-07	-0.306768	0.144	0.215	0.00732531	Antibody-secreting cells
HEXB	4.9416e-07	-0.345498	0.095	0.163	0.00778845	Antibody-secreting cells
ELOF1	5.06256e-07	-0.35954	0.215	0.276	0.00797909	Antibody-secreting cells
IPO5	5.36683e-07	-0.289016	0.14	0.211	0.00845865	Antibody-secreting cells
CYC1	5.38302e-07	-0.33366	0.37	0.397	0.00848418	Antibody-secreting cells
WDR82	5.54711e-07	-0.341425	0.187	0.253	0.0087428	Antibody-secreting cells
SETD2	5.95854e-07	-0.365123	0.183	0.247	0.00939126	Antibody-secreting cells
PIK3R1	6.05078e-07	-0.344503	0.101	0.172	0.00953663	Antibody-secreting cells
PRPF31	6.08505e-07	-0.292536	0.108	0.177	0.00959064	Antibody-secreting cells
TLE5	6.24328e-07	-0.353116	0.165	0.233	0.00984003	Antibody-secreting cells
LIN7C	6.40084e-07	-0.285219	0.101	0.171	0.0100884	Antibody-secreting cells
DAP3	6.50699e-07	-0.35591	0.183	0.246	0.0102557	Antibody-secreting cells
RAD23A	6.78717e-07	-0.390677	0.382	0.396	0.0106973	Antibody-secreting cells
CPSF2	6.85075e-07	-0.288896	0.111	0.182	0.0107975	Antibody-secreting cells
IWS1	7.66306e-07	-0.267384	0.111	0.183	0.0120777	Antibody-secreting cells
SNF8	8.16915e-07	-0.357471	0.422	0.428	0.0128754	Antibody-secreting cells
DNAJC10	8.32826e-07	-0.392145	0.269	0.319	0.0131262	Antibody-secreting cells
LFNG	8.63339e-07	-0.282305	0.07	0.137	0.0136071	Antibody-secreting cells
SRPK1	8.85679e-07	-0.313536	0.196	0.26	0.0139592	Antibody-secreting cells
NIPBL	9.37331e-07	-0.366278	0.201	0.262	0.0147733	Antibody-secreting cells
UQCC2	9.45045e-07	-0.376358	0.395	0.412	0.0148948	Antibody-secreting cells
MAP4K1	9.66732e-07	-0.324706	0.145	0.213	0.0152367	Antibody-secreting cells
TAF2	1.01378e-06	-0.261014	0.092	0.159	0.0159782	Antibody-secreting cells
KAT8	1.02921e-06	-0.302812	0.11	0.177	0.0162214	Antibody-secreting cells
CDC123	1.0298e-06	-0.328359	0.151	0.217	0.0162307	Antibody-secreting cells
ENSSSCG00000014280	1.03862e-06	-0.35267	0.181	0.245	0.0163697	Antibody-secreting cells
C3orf38	1.07559e-06	-0.378629	0.215	0.272	0.0169523	Antibody-secreting cells
AFTPH	1.07763e-06	-0.332462	0.142	0.209	0.0169846	Antibody-secreting cells
CHD1	1.08626e-06	-0.391071	0.19	0.25	0.0171206	Antibody-secreting cells
SRSF11	1.118e-06	-0.31932	0.136	0.203	0.0176208	Antibody-secreting cells
RIF1	1.1819e-06	-0.283004	0.097	0.164	0.0186279	Antibody-secreting cells
SMARCA5	1.20769e-06	-0.413652	0.42	0.418	0.0190343	Antibody-secreting cells
RANBP6	1.22161e-06	-0.339967	0.108	0.173	0.0192539	Antibody-secreting cells
CCDC174	1.23476e-06	-0.309216	0.102	0.17	0.0194611	Antibody-secreting cells
ETF1	1.25828e-06	-0.351002	0.226	0.28	0.0198317	Antibody-secreting cells
SAFB2	1.27446e-06	-0.413207	0.296	0.332	0.0200868	Antibody-secreting cells
MOBKL3	1.31156e-06	-0.330818	0.169	0.234	0.0206715	Antibody-secreting cells
PAFAH1B3	1.31496e-06	-0.356056	0.189	0.25	0.0207251	Antibody-secreting cells
KPNA2	1.3202e-06	-0.3663	0.142	0.21	0.0208077	Antibody-secreting cells
BRIX1	1.3295e-06	-0.372621	0.232	0.287	0.0209542	Antibody-secreting cells
ENSSSCG00000033700	1.35991e-06	-0.329106	0.224	0.282	0.0214336	Antibody-secreting cells
MPHOSPH6	1.36982e-06	-0.292742	0.142	0.208	0.0215897	Antibody-secreting cells
G3BP2	1.37403e-06	-0.316455	0.138	0.204	0.0216561	Antibody-secreting cells
CDC40	1.42895e-06	-0.282645	0.101	0.168	0.0225216	Antibody-secreting cells
YTHDF2	1.44263e-06	-0.355148	0.206	0.264	0.0227372	Antibody-secreting cells
DCTN2	1.47857e-06	-0.330616	0.154	0.219	0.0233037	Antibody-secreting cells
CRIPT	1.50592e-06	-0.388825	0.262	0.306	0.0237349	Antibody-secreting cells
TAOK3	1.52228e-06	-0.294483	0.106	0.173	0.0239927	Antibody-secreting cells
ARL5A	1.52642e-06	-0.346551	0.158	0.221	0.0240579	Antibody-secreting cells
NDUFS6	1.54437e-06	-0.351616	0.276	0.32	0.0243408	Antibody-secreting cells
HES6	1.55359e-06	-0.255135	0.05	0.111	0.0244861	Antibody-secreting cells
ENSSSCG00000003664	1.66717e-06	-0.301236	0.127	0.193	0.0262763	Antibody-secreting cells
NDUFA10	1.73894e-06	-0.313843	0.203	0.262	0.0274074	Antibody-secreting cells
CENPC	1.76813e-06	-0.32589	0.149	0.214	0.0278675	Antibody-secreting cells
BID	1.8048e-06	-0.320486	0.248	0.304	0.0284454	Antibody-secreting cells
FAM126A	1.80933e-06	-0.294176	0.077	0.141	0.0285168	Antibody-secreting cells
NDUFB7	1.81462e-06	-0.357601	0.522	0.482	0.0286002	Antibody-secreting cells
DTX2	1.85408e-06	-0.311712	0.099	0.164	0.0292221	Antibody-secreting cells
NCKAP1L	1.89572e-06	-0.317341	0.138	0.204	0.0298784	Antibody-secreting cells
ENSSSCG00000010855	1.92471e-06	-0.251374	0.088	0.153	0.0303353	Antibody-secreting cells
C1orf131	1.92475e-06	-0.274647	0.093	0.158	0.0303359	Antibody-secreting cells
RPA2	1.9419e-06	-0.296207	0.181	0.245	0.0306064	Antibody-secreting cells
HSPA9	1.98552e-06	-0.385229	0.305	0.338	0.0312937	Antibody-secreting cells
TAF13	2.13985e-06	-0.291617	0.111	0.176	0.0337263	Antibody-secreting cells
MPHOSPH9	2.24154e-06	-0.273485	0.106	0.171	0.0353289	Antibody-secreting cells
EEF1AKMT1	2.24953e-06	-0.327069	0.167	0.227	0.0354548	Antibody-secreting cells
MAEA	2.279e-06	-0.330473	0.135	0.197	0.0359194	Antibody-secreting cells
ETFA	2.3489e-06	-0.305959	0.196	0.255	0.0370211	Antibody-secreting cells
UBE2K	2.35565e-06	-0.348354	0.189	0.245	0.0371273	Antibody-secreting cells
PAFAH1B1	2.48083e-06	-0.366881	0.226	0.275	0.0391004	Antibody-secreting cells
GADD45B	2.63976e-06	-0.345649	0.115	0.179	0.0416053	Antibody-secreting cells
ZNF75D	2.64796e-06	-0.318944	0.162	0.223	0.0417345	Antibody-secreting cells
PSMD2	2.79574e-06	-0.362288	0.318	0.346	0.0440637	Antibody-secreting cells
ENSSSCG00000011117	2.80002e-06	-0.354144	0.196	0.254	0.0441311	Antibody-secreting cells
PSMD6	2.91896e-06	-0.323011	0.136	0.197	0.0460057	Antibody-secreting cells
GAPVD1	2.94311e-06	-0.288743	0.106	0.171	0.0463863	Antibody-secreting cells
TAF7	3.0156e-06	-0.371548	0.199	0.257	0.0475288	Antibody-secreting cells
ZDHHC20	3.07548e-06	-0.277333	0.068	0.129	0.0484727	Antibody-secreting cells
ITM2A	0	0.865416	0.247	0.009	0	Transitioning B cells
PRDM1	7.86617e-226	0.80756	0.394	0.043	1.23979e-221	Transitioning B cells
XBP1	4.93455e-222	1.51606	0.824	0.241	7.77735e-218	Transitioning B cells
TMEM38B	6.41861e-201	0.857156	0.359	0.041	1.01164e-196	Transitioning B cells
CST3	4.37017e-177	1.09094	0.555	0.109	6.88782e-173	Transitioning B cells
ENSSSCG00000034698	1.20204e-167	1.14476	0.447	0.077	1.89453e-163	Transitioning B cells
ENSSSCG00000025644	7.30901e-163	1.1333	0.389	0.058	1.15197e-158	Transitioning B cells
ENSSSCG00000000849	1.48724e-160	1.26769	0.751	0.256	2.34404e-156	Transitioning B cells
ENSSSCG00000033909	4.34414e-160	1.35727	0.863	0.348	6.84679e-156	Transitioning B cells
ENSSSCG00000010044	1.03905e-153	0.868513	0.281	0.031	1.63764e-149	Transitioning B cells
ENSSSCG00000034072	2.95182e-152	1.38138	0.831	0.351	4.65237e-148	Transitioning B cells
ENSSSCG00000014850	8.37606e-149	1.17146	0.829	0.35	1.32015e-144	Transitioning B cells
ELL2	9.20736e-147	0.763012	0.401	0.067	1.45117e-142	Transitioning B cells
CHST2	2.52445e-140	0.34931	0.137	0.007	3.97878e-136	Transitioning B cells
TXNDC5	8.34119e-139	0.853728	0.391	0.067	1.31465e-134	Transitioning B cells
SPCS1	4.33534e-136	1.16669	0.944	0.701	6.83292e-132	Transitioning B cells
IRF4	7.98682e-124	0.763434	0.345	0.058	1.2588e-119	Transitioning B cells
ZNF70	1.6665e-123	1.3399	0.944	0.819	2.62658e-119	Transitioning B cells
ENSSSCG00000037775	1.69704e-120	2.26946	0.936	0.89	2.67471e-116	Transitioning B cells
RGS1	7.73553e-118	1.45653	0.951	0.648	1.2192e-113	Transitioning B cells
LGALS3BP	8.41591e-118	0.737714	0.43	0.093	1.32643e-113	Transitioning B cells
ENSSSCG00000039731	6.1285e-115	0.899367	0.518	0.135	9.65913e-111	Transitioning B cells
SELENOS	9.19865e-113	0.960766	0.575	0.175	1.4498e-108	Transitioning B cells
MZB1	1.66524e-111	1.1018	0.888	0.588	2.62459e-107	Transitioning B cells
SSR2	8.3485e-111	0.92717	0.958	0.791	1.31581e-106	Transitioning B cells
TPST1	4.87082e-110	0.906665	0.531	0.148	7.67689e-106	Transitioning B cells
FKBP11	3.86578e-109	0.857132	0.592	0.179	6.09286e-105	Transitioning B cells
SEC61B	2.61079e-105	0.91862	0.939	0.745	4.11487e-101	Transitioning B cells
ENSSSCG00000016737	2.42646e-104	-0.814173	0.939	0.986	3.82434e-100	Transitioning B cells
CD44	5.01936e-103	0.679869	0.364	0.075	7.91101e-99	Transitioning B cells
TENT5C	1.66724e-102	0.885352	0.575	0.177	2.62773e-98	Transitioning B cells
ITGB7	3.29554e-100	1.00983	0.489	0.141	5.1941e-96	Transitioning B cells
ENSSSCG00000009327	4.4008e-100	-1.319	0.853	0.939	6.9361e-96	Transitioning B cells
DNAJB9	5.37127e-99	0.827888	0.489	0.135	8.46566e-95	Transitioning B cells
HMGN2	1.06495e-96	-1.38403	0.733	0.903	1.67847e-92	Transitioning B cells
ENSSSCG00000001075	5.59494e-96	-1.42123	0.081	0.635	8.81818e-92	Transitioning B cells
B2M	1.05276e-95	0.809031	0.998	0.938	1.65926e-91	Transitioning B cells
CTSH	1.40346e-95	1.00555	0.79	0.423	2.212e-91	Transitioning B cells
PLAAT3	2.21146e-94	0.555008	0.262	0.043	3.48549e-90	Transitioning B cells
CREB3L2	6.07101e-94	0.278204	0.112	0.008	9.56852e-90	Transitioning B cells
MGAT4A	2.24546e-92	1.01934	0.736	0.362	3.53907e-88	Transitioning B cells
ENSSSCG00000038351	1.53167e-91	0.7435	0.401	0.096	2.41406e-87	Transitioning B cells
IL6R	3.67012e-90	0.530128	0.274	0.048	5.78447e-86	Transitioning B cells
ZP3	6.89653e-90	1.44112	0.714	0.382	1.08696e-85	Transitioning B cells
ENSSSCG00000038719	2.76042e-89	1.96421	0.883	0.665	4.3507e-85	Transitioning B cells
AICDA	5.74093e-87	-1.69053	0.051	0.583	9.04828e-83	Transitioning B cells
VPREB1	2.33212e-86	1.32044	0.665	0.292	3.67565e-82	Transitioning B cells
ENSSSCG00000000657	2.68216e-84	0.846514	0.614	0.236	4.22735e-80	Transitioning B cells
CD79A	1.76558e-81	0.856856	0.697	0.314	2.78273e-77	Transitioning B cells
ENSSSCG00000009145	2.04786e-81	0.951769	0.694	0.353	3.22763e-77	Transitioning B cells
HMGB2	2.37035e-81	-1.71008	0.587	0.812	3.7359e-77	Transitioning B cells
ENSSSCG00000037214	2.96004e-81	0.917551	0.352	0.085	4.66532e-77	Transitioning B cells
ERLEC1	5.53114e-81	0.764502	0.575	0.212	8.71762e-77	Transitioning B cells
ENSSSCG00000032582	1.67706e-80	0.898189	0.205	0.031	2.64322e-76	Transitioning B cells
HERPUD1	1.97357e-80	0.933433	0.797	0.464	3.11054e-76	Transitioning B cells
ENSSSCG00000016990	1.73957e-77	0.891704	0.829	0.495	2.74173e-73	Transitioning B cells
CD69	6.13414e-77	1.26294	0.768	0.425	9.66801e-73	Transitioning B cells
GPR183	3.94508e-76	0.645918	0.491	0.148	6.21784e-72	Transitioning B cells
GAPDH	7.80285e-76	-0.862375	0.729	0.908	1.22981e-71	Transitioning B cells
TNFSF10	9.03461e-76	0.636177	0.335	0.081	1.42394e-71	Transitioning B cells
RGS18	1.57046e-75	0.516808	0.235	0.042	2.4752e-71	Transitioning B cells
H2AFZ	4.63961e-74	-1.20193	0.675	0.854	7.31249e-70	Transitioning B cells
ENSSSCG00000015434	5.08913e-74	-1.08244	0.24	0.675	8.02098e-70	Transitioning B cells
ELL3	6.90003e-74	-1.15764	0.147	0.618	1.08751e-69	Transitioning B cells
ENSSSCG00000039740	2.17589e-73	-0.401859	0.998	1	3.42943e-69	Transitioning B cells
ENSSSCG00000006360	1.45141e-72	0.706395	0.504	0.176	2.28757e-68	Transitioning B cells
FAM3C	6.7788e-72	0.777898	0.841	0.505	1.06841e-67	Transitioning B cells
ENSSSCG00000036350	9.83576e-72	-0.706579	0.885	0.95	1.55021e-67	Transitioning B cells
LY86	4.41762e-71	-1.03353	0.191	0.652	6.96261e-67	Transitioning B cells
SOD1	1.22587e-69	-0.905534	0.589	0.816	1.9321e-65	Transitioning B cells
SCIMP	2.55557e-69	0.634191	0.364	0.099	4.02783e-65	Transitioning B cells
PIK3CG	4.76251e-69	0.405325	0.181	0.028	7.50619e-65	Transitioning B cells
STT3B	7.7497e-68	0.73899	0.33	0.088	1.22143e-63	Transitioning B cells
PPIB	1.03978e-67	0.841649	0.812	0.557	1.63879e-63	Transitioning B cells
SAMSN1	1.2032e-67	0.575838	0.347	0.092	1.89637e-63	Transitioning B cells
LMAN1	1.56374e-66	0.689815	0.443	0.148	2.46462e-62	Transitioning B cells
SEPT11	1.60798e-66	0.864879	0.496	0.185	2.53434e-62	Transitioning B cells
TPST2	2.56487e-66	0.521117	0.323	0.083	4.0425e-62	Transitioning B cells
RABAC1	1.50135e-64	0.811225	0.685	0.375	2.36627e-60	Transitioning B cells
DUT	4.48579e-64	-1.2929	0.479	0.734	7.07006e-60	Transitioning B cells
ENSSSCG00000012397	6.74787e-64	0.728128	0.638	0.297	1.06353e-59	Transitioning B cells
ENSSSCG00000034211	7.07593e-64	-1.07539	0.056	0.506	1.11524e-59	Transitioning B cells
RPS26	9.59151e-64	-0.384845	0.998	0.998	1.51172e-59	Transitioning B cells
ENSSSCG00000013889	1.85839e-63	-0.386328	0.995	0.999	2.92902e-59	Transitioning B cells
RAN	5.03733e-63	-0.804043	0.687	0.844	7.93934e-59	Transitioning B cells
PLEKHA1	1.22426e-62	0.337645	0.166	0.026	1.92956e-58	Transitioning B cells
DNMT1	3.20947e-62	-1.13293	0.149	0.563	5.05844e-58	Transitioning B cells
TUBA1B	5.14687e-62	-1.11658	0.765	0.88	8.11198e-58	Transitioning B cells
TUBB	8.58562e-62	-1.41005	0.33	0.645	1.35318e-57	Transitioning B cells
ENSSSCG00000037030	1.65993e-61	-0.380696	0.988	0.997	2.61622e-57	Transitioning B cells
SARAF	7.09314e-61	0.629998	0.435	0.151	1.11795e-56	Transitioning B cells
PRDX4	3.00564e-60	0.70461	0.501	0.199	4.7372e-56	Transitioning B cells
ENSSSCG00000001229	3.43717e-60	0.568342	0.99	0.884	5.41732e-56	Transitioning B cells
CCND3	5.04439e-60	-0.985564	0.147	0.557	7.95047e-56	Transitioning B cells
ENSSSCG00000008898	4.24485e-59	0.475196	0.205	0.04	6.69031e-55	Transitioning B cells
RFC1	7.68018e-59	-1.0624	0.208	0.595	1.21047e-54	Transitioning B cells
SLAMF7	8.08035e-59	0.803256	0.421	0.15	1.27354e-54	Transitioning B cells
SPCS3	1.45112e-58	0.716036	0.758	0.469	2.28712e-54	Transitioning B cells
ENSSSCG00000009673	2.40025e-58	-1.14256	0.115	0.523	3.78304e-54	Transitioning B cells
VAMP8	3.40212e-58	-0.756447	0.579	0.832	5.36209e-54	Transitioning B cells
LAPTM5	5.34045e-58	-0.805256	0.467	0.794	8.41708e-54	Transitioning B cells
SEC11C	1.07429e-57	0.71319	0.565	0.26	1.69319e-53	Transitioning B cells
DERL3	1.42611e-57	0.76886	0.702	0.389	2.24769e-53	Transitioning B cells
TCEA1	1.69099e-57	-0.991174	0.675	0.811	2.66517e-53	Transitioning B cells
FNDC3A	2.15953e-57	0.467236	0.244	0.057	3.40363e-53	Transitioning B cells
CFLAR	9.57383e-57	0.71375	0.68	0.356	1.50893e-52	Transitioning B cells
HSPA5	1.0623e-56	0.654712	0.924	0.785	1.6743e-52	Transitioning B cells
SSR3	3.80795e-56	0.764914	0.589	0.294	6.0017e-52	Transitioning B cells
ENSSSCG00000036224	1.61069e-55	2.10659	0.985	0.926	2.5386e-51	Transitioning B cells
ENSSSCG00000035768	2.74801e-55	-0.324297	0.998	0.999	4.33114e-51	Transitioning B cells
HSPE1	4.1264e-55	-0.665568	0.809	0.922	6.50362e-51	Transitioning B cells
ALOX15	4.20168e-55	0.322961	0.132	0.019	6.62227e-51	Transitioning B cells
ENSSSCG00000033733	4.61296e-55	-0.688051	0.812	0.905	7.27048e-51	Transitioning B cells
RPL36AL	8.96871e-55	0.490125	0.956	0.864	1.41356e-50	Transitioning B cells
YWHAB	2.01566e-54	-0.667803	0.68	0.868	3.17689e-50	Transitioning B cells
CFL1	6.47371e-54	-0.518055	0.875	0.96	1.02032e-49	Transitioning B cells
HYPK	2.34162e-53	-0.688054	0.55	0.806	3.69063e-49	Transitioning B cells
ID3	4.09925e-53	-0.82441	0.352	0.699	6.46082e-49	Transitioning B cells
ENSSSCG00000009772	5.75498e-53	0.729268	0.709	0.436	9.07043e-49	Transitioning B cells
ENSSSCG00000007743	7.22776e-53	-0.546836	0.814	0.924	1.13917e-48	Transitioning B cells
CLGN	7.39147e-53	0.547194	0.252	0.063	1.16497e-48	Transitioning B cells
ATOX1	1.50211e-52	0.792828	0.716	0.458	2.36748e-48	Transitioning B cells
SDF4	1.8015e-52	0.650012	0.533	0.238	2.83934e-48	Transitioning B cells
TPM3	6.5401e-52	-0.572339	0.724	0.885	1.03079e-47	Transitioning B cells
H2AFV	1.08612e-50	-0.797907	0.689	0.825	1.71183e-46	Transitioning B cells
H3F3A	1.81051e-50	-0.435245	0.995	0.995	2.85355e-46	Transitioning B cells
SDF2L1	2.65153e-50	0.742784	0.386	0.142	4.17907e-46	Transitioning B cells
GPR174	4.35094e-50	0.64692	0.46	0.179	6.85752e-46	Transitioning B cells
ENSSSCG00000028485	4.83146e-50	-0.633692	0.756	0.882	7.61486e-46	Transitioning B cells
SRSF10	4.92841e-50	-0.84875	0.408	0.7	7.76767e-46	Transitioning B cells
ENSSSCG00000031023	7.11639e-50	0.902664	0.584	0.284	1.12161e-45	Transitioning B cells
SSR4	8.13047e-50	0.612449	0.839	0.625	1.28144e-45	Transitioning B cells
DAD1	2.50387e-49	0.659434	0.758	0.52	3.94634e-45	Transitioning B cells
DNAJC3	2.84559e-49	0.451303	0.249	0.065	4.48493e-45	Transitioning B cells
SLC2A6	4.5075e-49	0.336551	0.176	0.035	7.10427e-45	Transitioning B cells
ENSSSCG00000012961	3.08361e-48	-0.550568	0.782	0.895	4.86008e-44	Transitioning B cells
SUMO2	7.00482e-48	-0.526416	0.836	0.916	1.10403e-43	Transitioning B cells
PCLAF	8.85476e-48	-1.59694	0.132	0.473	1.3956e-43	Transitioning B cells
HINT1	1.06607e-47	-0.578965	0.763	0.873	1.68024e-43	Transitioning B cells
PDIA4	2.44938e-47	0.678808	0.729	0.475	3.86046e-43	Transitioning B cells
TUBB2B	2.66394e-47	0.699112	0.484	0.211	4.19863e-43	Transitioning B cells
ENSSSCG00000014672	3.01855e-47	-0.875551	0.169	0.531	4.75754e-43	Transitioning B cells
HSP90AA1	9.83571e-47	-0.762195	0.834	0.91	1.55021e-42	Transitioning B cells
RPS5	1.09678e-46	-0.355989	0.978	0.997	1.72864e-42	Transitioning B cells
CD81	1.68351e-46	0.586848	0.643	0.341	2.65337e-42	Transitioning B cells
TXNDC11	3.72554e-46	0.461315	0.227	0.058	5.87183e-42	Transitioning B cells
SGK1	8.04722e-46	0.696009	0.43	0.173	1.26832e-41	Transitioning B cells
MANF	1.28956e-45	0.684528	0.709	0.448	2.03248e-41	Transitioning B cells
FUS	1.45057e-45	-0.766676	0.264	0.606	2.28624e-41	Transitioning B cells
USP1	3.91221e-45	-0.83843	0.244	0.575	6.16603e-41	Transitioning B cells
ERP29	4.08218e-45	0.655032	0.577	0.307	6.43392e-41	Transitioning B cells
CORO1A	5.04063e-45	-0.474107	0.861	0.948	7.94453e-41	Transitioning B cells
CFD	5.32202e-45	0.544195	0.213	0.052	8.38803e-41	Transitioning B cells
ARPC1B	6.88142e-45	-0.623708	0.721	0.866	1.08458e-40	Transitioning B cells
BTF3	8.46925e-45	-0.438994	0.902	0.963	1.33484e-40	Transitioning B cells
TMSB10	1.07643e-44	-0.37963	0.995	0.998	1.69656e-40	Transitioning B cells
ENSSSCG00000012916	1.22481e-44	-0.646822	0.724	0.865	1.93042e-40	Transitioning B cells
DDOST	1.96069e-44	0.653191	0.579	0.317	3.09024e-40	Transitioning B cells
RRBP1	2.11739e-44	0.508172	0.335	0.114	3.33721e-40	Transitioning B cells
ARID3A	2.18252e-44	0.279798	0.13	0.022	3.43986e-40	Transitioning B cells
RPN1	5.52723e-44	0.614563	0.531	0.259	8.71147e-40	Transitioning B cells
TRAM2	5.62605e-44	0.26008	0.139	0.025	8.86721e-40	Transitioning B cells
OAZ1	9.5712e-44	-0.384219	0.983	0.991	1.50852e-39	Transitioning B cells
RPL10	5.66798e-43	0.326856	0.998	1	8.9333e-39	Transitioning B cells
SNRPD1	5.682e-43	-0.710001	0.413	0.673	8.95539e-39	Transitioning B cells
ATP5PB	1.02747e-42	-0.606022	0.699	0.847	1.61939e-38	Transitioning B cells
FCRL3	1.17191e-42	0.655439	0.538	0.266	1.84704e-38	Transitioning B cells
SERBP1	2.60233e-42	-0.54301	0.67	0.832	4.10153e-38	Transitioning B cells
RPS17	3.21356e-42	-0.288685	0.993	0.998	5.06489e-38	Transitioning B cells
UCP2	7.30988e-42	-0.748979	0.413	0.67	1.15211e-37	Transitioning B cells
FCRLA	1.02383e-41	-0.856324	0.09	0.433	1.61365e-37	Transitioning B cells
EDEM1	1.40276e-41	0.521817	0.279	0.09	2.21089e-37	Transitioning B cells
CNPY2	2.46374e-41	0.489355	0.394	0.157	3.88311e-37	Transitioning B cells
DUSP5	5.31457e-41	0.549749	0.477	0.207	8.3763e-37	Transitioning B cells
ENSSSCG00000031741	5.75174e-41	-0.849338	0.137	0.463	9.06531e-37	Transitioning B cells
IFI6	1.48237e-40	0.581127	0.572	0.276	2.33636e-36	Transitioning B cells
JARID2	1.53543e-40	0.414447	0.342	0.12	2.41999e-36	Transitioning B cells
RPLP2	2.16426e-40	-0.292815	0.998	0.997	3.41108e-36	Transitioning B cells
ENSSSCG00000010203	2.88451e-40	-0.506316	0.785	0.891	4.54628e-36	Transitioning B cells
PDE4B	3.49477e-40	0.560999	0.594	0.31	5.50811e-36	Transitioning B cells
IL10RB	4.06061e-40	0.483326	0.284	0.092	6.39993e-36	Transitioning B cells
PPP1CC	5.50773e-40	-0.688445	0.359	0.633	8.68073e-36	Transitioning B cells
PCNA	1.07348e-39	-1.07888	0.279	0.555	1.69191e-35	Transitioning B cells
NFKBIA	1.6297e-39	0.702671	0.702	0.446	2.56857e-35	Transitioning B cells
METTL9	2.1849e-39	0.518928	0.34	0.13	3.44362e-35	Transitioning B cells
SNRPF	2.24601e-39	-0.699994	0.318	0.604	3.53993e-35	Transitioning B cells
NAP1L1	2.6412e-39	-0.498493	0.795	0.907	4.16279e-35	Transitioning B cells
BIRC5	2.68583e-39	-1.03128	0.117	0.429	4.23314e-35	Transitioning B cells
CRELD2	5.06947e-39	0.47433	0.249	0.077	7.98999e-35	Transitioning B cells
STMN1	5.1389e-39	-1.0303	0.655	0.757	8.09942e-35	Transitioning B cells
APMAP	7.30088e-39	0.546598	0.611	0.34	1.15069e-34	Transitioning B cells
ACTB	8.23005e-39	-0.577447	0.866	0.961	1.29714e-34	Transitioning B cells
FUT8	9.72558e-39	0.449329	0.274	0.09	1.53285e-34	Transitioning B cells
ENSSSCG00000037081	1.63283e-38	-0.465567	0.831	0.901	2.5735e-34	Transitioning B cells
RANBP1	1.76898e-38	-0.824817	0.271	0.557	2.78808e-34	Transitioning B cells
TMED9	3.84104e-38	0.521317	0.682	0.415	6.05386e-34	Transitioning B cells
LMNA	4.32504e-38	0.320197	0.159	0.035	6.8167e-34	Transitioning B cells
IFNGR2	4.78634e-38	0.453807	0.293	0.1	7.54375e-34	Transitioning B cells
SNRPE	7.33286e-38	-0.55439	0.677	0.798	1.15573e-33	Transitioning B cells
HM13	2.88991e-37	0.463517	0.352	0.137	4.55479e-33	Transitioning B cells
RACK1	3.0575e-37	-0.352264	0.939	0.979	4.81893e-33	Transitioning B cells
SRI	3.48328e-37	0.626104	0.802	0.628	5.49e-33	Transitioning B cells
ENSSSCG00000030197	3.59317e-37	-0.765477	0.127	0.449	5.6632e-33	Transitioning B cells
RPL39	4.23086e-37	-0.288188	1	0.998	6.66826e-33	Transitioning B cells
ENSSSCG00000011952	4.40965e-37	-0.351935	0.98	0.986	6.95005e-33	Transitioning B cells
CKS1B	5.63833e-37	-0.930828	0.198	0.482	8.88657e-33	Transitioning B cells
RPL27	1.25934e-36	-0.354784	0.958	0.974	1.98485e-32	Transitioning B cells
SLC25A6	3.01756e-36	-0.399759	0.9	0.957	4.75598e-32	Transitioning B cells
MCM7	4.5826e-36	-0.872315	0.127	0.422	7.22263e-32	Transitioning B cells
ENSSSCG00000029830	5.37379e-36	-0.270024	0.998	0.999	8.46963e-32	Transitioning B cells
ENSSSCG00000040857	6.14682e-36	-0.583687	0.484	0.707	9.688e-32	Transitioning B cells
ENSSSCG00000006061	6.84809e-36	0.556921	0.822	0.603	1.07933e-31	Transitioning B cells
ENSSSCG00000033721	7.61355e-36	-0.784031	0.369	0.624	1.19997e-31	Transitioning B cells
TPI1	1.00914e-35	-0.560041	0.614	0.777	1.5905e-31	Transitioning B cells
TOP2A	1.74635e-35	-1.16482	0.015	0.301	2.75242e-31	Transitioning B cells
SMC4	2.08681e-35	-0.947866	0.218	0.496	3.28902e-31	Transitioning B cells
ERH	3.12719e-35	-0.585072	0.501	0.712	4.92877e-31	Transitioning B cells
ENSSSCG00000027826	3.39581e-35	0.581915	0.496	0.253	5.35214e-31	Transitioning B cells
ENSSSCG00000039046	6.96868e-35	-0.368631	0.951	0.978	1.09833e-30	Transitioning B cells
RPIA	8.78505e-35	0.533497	0.763	0.535	1.38461e-30	Transitioning B cells
ENSSSCG00000005656	1.28816e-34	-0.480856	0.741	0.869	2.03027e-30	Transitioning B cells
PTMA	1.65715e-34	-0.390301	1	0.999	2.61184e-30	Transitioning B cells
NUCKS1	3.43065e-34	-0.791048	0.447	0.659	5.40705e-30	Transitioning B cells
CD86	4.04375e-34	-0.700924	0.061	0.359	6.37335e-30	Transitioning B cells
ATP5MC3	6.64967e-34	-0.633943	0.352	0.614	1.04805e-29	Transitioning B cells
ENSSSCG00000030775	7.42617e-34	0.545609	0.108	0.019	1.17044e-29	Transitioning B cells
SURF4	8.208e-34	0.479044	0.33	0.133	1.29366e-29	Transitioning B cells
ENSSSCG00000031088	8.32052e-34	-0.254303	1	0.999	1.3114e-29	Transitioning B cells
ENSSSCG00000036716	1.67779e-33	-0.276418	0.998	0.997	2.64437e-29	Transitioning B cells
TRAM1	1.85554e-33	0.555126	0.65	0.432	2.92452e-29	Transitioning B cells
ENO1	1.90219e-33	-0.60157	0.535	0.734	2.99804e-29	Transitioning B cells
HSP90AB1	2.0817e-33	-0.503266	0.77	0.895	3.28096e-29	Transitioning B cells
ARPC3	2.57695e-33	-0.434943	0.841	0.905	4.06154e-29	Transitioning B cells
ATP5F1A	2.69334e-33	-0.503715	0.631	0.783	4.24498e-29	Transitioning B cells
SMIM14	3.18741e-33	-0.723156	0.112	0.401	5.02367e-29	Transitioning B cells
CD83	3.3223e-33	0.792668	0.567	0.332	5.23628e-29	Transitioning B cells
CALR	3.66631e-33	0.685538	0.653	0.427	5.77846e-29	Transitioning B cells
TMBIM6	4.32466e-33	0.404011	0.861	0.682	6.8161e-29	Transitioning B cells
NEK7	5.51834e-33	0.349862	0.176	0.047	8.69746e-29	Transitioning B cells
RPS23	8.39785e-33	-0.277232	0.99	0.997	1.32358e-28	Transitioning B cells
RBM38	8.78542e-33	-0.631885	0.269	0.565	1.38467e-28	Transitioning B cells
TPX2	1.03677e-32	-0.922674	0.034	0.31	1.63406e-28	Transitioning B cells
HNRNPM	1.56613e-32	-0.541733	0.469	0.692	2.46837e-28	Transitioning B cells
SSR1	1.89958e-32	0.543148	0.513	0.28	2.99392e-28	Transitioning B cells
RILPL2	1.98804e-32	0.54456	0.377	0.166	3.13335e-28	Transitioning B cells
ATP6AP2	2.41972e-32	0.517188	0.452	0.222	3.81372e-28	Transitioning B cells
SPC24	4.90144e-32	-0.677747	0.037	0.311	7.72515e-28	Transitioning B cells
PRKCD	5.14377e-32	0.490382	0.399	0.185	8.10709e-28	Transitioning B cells
ABLIM1	5.75074e-32	-0.656947	0.09	0.381	9.06375e-28	Transitioning B cells
ENSSSCG00000024974	7.18245e-32	-0.294866	0.99	0.994	1.13203e-27	Transitioning B cells
HMCES	7.30332e-32	-0.76486	0.523	0.671	1.15108e-27	Transitioning B cells
SLA-DMA	8.90123e-32	-0.574562	0.35	0.647	1.40292e-27	Transitioning B cells
ENSSSCG00000024776	1.97453e-31	-0.556862	0.582	0.742	3.11205e-27	Transitioning B cells
LMNB1	2.20331e-31	-0.692398	0.081	0.359	3.47264e-27	Transitioning B cells
CACYBP	3.64457e-31	-0.619727	0.403	0.641	5.74421e-27	Transitioning B cells
TYMS	4.04222e-31	-0.660234	0.262	0.533	6.37094e-27	Transitioning B cells
PHACTR3	4.34693e-31	0.293076	0.115	0.024	6.8512e-27	Transitioning B cells
RPL3	4.68079e-31	-0.353487	0.944	0.965	7.37739e-27	Transitioning B cells
ENSSSCG00000033757	5.26459e-31	0.556599	0.443	0.23	8.29752e-27	Transitioning B cells
SRSF2	7.10571e-31	-0.57705	0.575	0.728	1.11993e-26	Transitioning B cells
TUBB4B	7.83466e-31	-0.932861	0.169	0.438	1.23482e-26	Transitioning B cells
ENSSSCG00000015710	1.04174e-30	-0.516766	0.609	0.773	1.64189e-26	Transitioning B cells
MED13L	1.39108e-30	0.381474	0.269	0.098	2.19249e-26	Transitioning B cells
ENSSSCG00000031037	1.44813e-30	0.323709	0.108	0.021	2.2824e-26	Transitioning B cells
ENSSSCG00000008433	1.84373e-30	-0.527284	0.819	0.877	2.9059e-26	Transitioning B cells
CCT3	3.08796e-30	-0.592085	0.342	0.594	4.86694e-26	Transitioning B cells
ACTG1	3.82154e-30	-0.393653	0.907	0.957	6.02313e-26	Transitioning B cells
[truncated: 2,753 more rows]

## Sheet: GO_results
cluster	GO.ID	Term	Annotated	Significant	Expected	pval
Antibody-secreting cells	GO:0050871	positive regulation of B cell activation	62	6	0.82	0.00016
Antibody-secreting cells	GO:0070863	positive regulation of protein exit from endoplasmic reticulum	9	3	0.12	0.00018
Antibody-secreting cells	GO:0006517	protein deglycosylation	9	3	0.12	0.00018
Antibody-secreting cells	GO:0050853	B cell receptor signaling pathway	41	5	0.54	0.00019
Antibody-secreting cells	GO:0006911	phagocytosis, engulfment	26	4	0.34	0.00035
Antibody-secreting cells	GO:0010466	negative regulation of peptidase activity	72	6	0.95	0.00036
Antibody-secreting cells	GO:1904294	positive regulation of ERAD pathway	12	3	0.16	0.00045
Antibody-secreting cells	GO:0045047	protein targeting to ER	20	8	0.26	0.00047
Antibody-secreting cells	GO:1904152	regulation of retrograde protein transport, ER to cytosol	11	4	0.14	0.0005
Antibody-secreting cells	GO:0065002	intracellular protein transmembrane transport	31	4	0.41	0.00069
Antibody-secreting cells	GO:0010955	negative regulation of protein processing	14	3	0.18	0.00073
Antibody-secreting cells	GO:0045454	cell redox homeostasis	18	3	0.24	0.00158
Antibody-secreting cells	GO:0150078	positive regulation of neuroinflammatory response	5	2	0.07	0.00168
Antibody-secreting cells	GO:0006621	protein retention in ER lumen	5	2	0.07	0.00168
Antibody-secreting cells	GO:0070292	N-acylphosphatidylethanolamine metabolic process	5	2	0.07	0.00168
Antibody-secreting cells	GO:0050901	leukocyte tethering or rolling	19	3	0.25	0.00186
Antibody-secreting cells	GO:0007030	Golgi organization	70	5	0.92	0.00226
Antibody-secreting cells	GO:1990144	intrinsic apoptotic signaling pathway in response to hypoxia	6	2	0.08	0.0025
Antibody-secreting cells	GO:0010561	negative regulation of glycoprotein biosynthetic process	6	2	0.08	0.0025
Antibody-secreting cells	GO:0006986	response to unfolded protein	66	13	0.87	0.00299
Antibody-secreting cells	GO:0019511	peptidyl-proline hydroxylation	7	2	0.09	0.00347
Antibody-secreting cells	GO:1900038	negative regulation of cellular response to hypoxia	7	2	0.09	0.00347
Antibody-secreting cells	GO:0002862	negative regulation of inflammatory response to antigenic stimulus	7	2	0.09	0.00347
Antibody-secreting cells	GO:0043113	receptor clustering	24	3	0.32	0.0037
Antibody-secreting cells	GO:0048194	Golgi vesicle budding	24	3	0.32	0.0037
Antibody-secreting cells	GO:0006487	protein N-linked glycosylation	41	9	0.54	0.00415
Antibody-secreting cells	GO:0002724	regulation of T cell cytokine production	25	3	0.33	0.00417
Antibody-secreting cells	GO:1904153	negative regulation of retrograde protein transport, ER to cytosol	8	2	0.11	0.00459
Antibody-secreting cells	GO:0006983	ER overload response	8	2	0.11	0.00459
Antibody-secreting cells	GO:0097201	negative regulation of transcription from RNA polymerase II promoter in response to stress	8	2	0.11	0.00459
Antibody-secreting cells	GO:0006486	protein glycosylation	130	14	1.71	0.00489
Antibody-secreting cells	GO:0061077	chaperone-mediated protein folding	28	3	0.37	0.00577
Antibody-secreting cells	GO:0010755	regulation of plasminogen activation	9	2	0.12	0.00585
Antibody-secreting cells	GO:0051923	sulfation	9	2	0.12	0.00585
Antibody-secreting cells	GO:0034620	cellular response to unfolded protein	59	11	0.78	0.00643
Antibody-secreting cells	GO:0072683	T cell extravasation	10	2	0.13	0.00724
Antibody-secreting cells	GO:0030252	growth hormone secretion	10	2	0.13	0.00724
Antibody-secreting cells	GO:0034113	heterotypic cell-cell adhesion	32	3	0.42	0.00841
Antibody-secreting cells	GO:1900026	positive regulation of substrate adhesion-dependent cell spreading	32	3	0.42	0.00841
Antibody-secreting cells	GO:0048199	vesicle targeting, to, from or within Golgi	11	2	0.14	0.00878
Antibody-secreting cells	GO:0002474	antigen processing and presentation of peptide antigen via MHC class I	11	2	0.14	0.00878
Antibody-secreting cells	GO:0051966	regulation of synaptic transmission, glutamatergic	11	2	0.14	0.00878
Antibody-secreting cells	GO:0098761	cellular response to interleukin-7	11	2	0.14	0.00878
Antibody-secreting cells	GO:2001242	regulation of intrinsic apoptotic signaling pathway	117	10	1.54	0.00929
Antibody-secreting cells	GO:0042742	defense response to bacterium	99	5	1.3	0.00985
Antibody-secreting cells	GO:0046641	positive regulation of alpha-beta T cell proliferation	12	2	0.16	0.01044
Antibody-secreting cells	GO:0051085	chaperone cofactor-dependent protein refolding	12	2	0.16	0.01044
Antibody-secreting cells	GO:0010951	negative regulation of endopeptidase activity	65	4	0.86	0.01052
Antibody-secreting cells	GO:0043393	regulation of protein binding	142	6	1.87	0.01117
Antibody-secreting cells	GO:0043154	negative regulation of cysteine-type endopeptidase activity involved in apoptotic process	36	3	0.47	0.01165
Antibody-secreting cells	GO:0060055	angiogenesis involved in wound healing	13	2	0.17	0.01223
Antibody-secreting cells	GO:0051084	'de novo' posttranslational protein folding	13	2	0.17	0.01223
Antibody-secreting cells	GO:0006458	'de novo' protein folding	13	2	0.17	0.01223
Antibody-secreting cells	GO:0009991	response to extracellular stimulus	189	7	2.49	0.01249
Antibody-secreting cells	GO:0051098	regulation of binding	236	8	3.11	0.01281
Antibody-secreting cells	GO:0006959	humoral immune response	80	8	1.05	0.01295
Antibody-secreting cells	GO:2000117	negative regulation of cysteine-type endopeptidase activity	39	3	0.51	0.01449
Antibody-secreting cells	GO:1903201	regulation of oxidative stress-induced cell death	39	3	0.51	0.01449
Antibody-secreting cells	GO:0032091	negative regulation of protein binding	72	4	0.95	0.01491
Antibody-secreting cells	GO:1903364	positive regulation of cellular protein catabolic process	86	7	1.13	0.01527
Antibody-secreting cells	GO:0002693	positive regulation of cellular extravasation	15	2	0.2	0.01619
Antibody-secreting cells	GO:0043901	negative regulation of multi-organism process	15	2	0.2	0.01619
Antibody-secreting cells	GO:0044706	multi-multicellular organism process	76	4	1	0.01786
Antibody-secreting cells	GO:0002702	positive regulation of production of molecular mediator of immune response	76	4	1	0.01786
Antibody-secreting cells	GO:0042311	vasodilation	18	2	0.24	0.02299
Antibody-secreting cells	GO:1900101	regulation of endoplasmic reticulum unfolded protein response	18	2	0.24	0.02299
Antibody-secreting cells	GO:0043403	skeletal muscle tissue regeneration	18	2	0.24	0.02299
Antibody-secreting cells	GO:0002726	positive regulation of T cell cytokine production	18	2	0.24	0.02299
Antibody-secreting cells	GO:0010959	regulation of metal ion transport	168	6	2.21	0.02367
Antibody-secreting cells	GO:0032469	endoplasmic reticulum calcium ion homeostasis	19	2	0.25	0.02548
Antibody-secreting cells	GO:1902175	regulation of oxidative stress-induced intrinsic apoptotic signaling pathway	19	2	0.25	0.02548
Antibody-secreting cells	GO:1903019	negative regulation of glycoprotein metabolic process	8	3	0.11	0.02584
Antibody-secreting cells	GO:0009617	response to bacterium	276	11	3.64	0.02638
Antibody-secreting cells	GO:1901800	positive regulation of proteasomal protein catabolic process	62	6	0.82	0.02657
Antibody-secreting cells	GO:0031667	response to nutrient levels	173	6	2.28	0.02685
Antibody-secreting cells	GO:0032436	positive regulation of proteasomal ubiquitin-dependent protein catabolic process	50	3	0.66	0.028
Antibody-secreting cells	GO:1900407	regulation of cellular response to oxidative stress	50	3	0.66	0.028
Antibody-secreting cells	GO:0001974	blood vessel remodeling	21	2	0.28	0.03076
Antibody-secreting cells	GO:0001893	maternal placenta development	21	2	0.28	0.03076
Antibody-secreting cells	GO:0002637	regulation of immunoglobulin production	52	3	0.69	0.03098
Antibody-secreting cells	GO:0042176	regulation of protein catabolic process	257	12	3.39	0.03181
Antibody-secreting cells	GO:0051961	negative regulation of nervous system development	134	5	1.77	0.03204
Antibody-secreting cells	GO:0007029	endoplasmic reticulum organization	53	3	0.7	0.03253
Antibody-secreting cells	GO:0046640	regulation of alpha-beta T cell proliferation	22	2	0.29	0.03355
Antibody-secreting cells	GO:0031668	cellular response to extracellular stimulus	136	5	1.79	0.03384
Antibody-secreting cells	GO:0036473	cell death in response to oxidative stress	54	3	0.71	0.03413
Antibody-secreting cells	GO:0097755	positive regulation of blood vessel diameter	23	2	0.3	0.03643
Antibody-secreting cells	GO:0002691	regulation of cellular extravasation	23	2	0.3	0.03643
Antibody-secreting cells	GO:0002828	regulation of type 2 immune response	23	2	0.3	0.03643
Antibody-secreting cells	GO:0035437	maintenance of protein localization in endoplasmic reticulum	8	3	0.11	0.0385
Antibody-secreting cells	GO:1903052	positive regulation of proteolysis involved in cellular protein catabolic process	70	6	0.92	0.03885
Antibody-secreting cells	GO:2001236	regulation of extrinsic apoptotic signaling pathway	97	4	1.28	0.03913
Antibody-secreting cells	GO:0000187	activation of MAPK activity	57	3	0.75	0.03914
Antibody-secreting cells	GO:1902882	regulation of response to oxidative stress	57	3	0.75	0.03914
Antibody-secreting cells	GO:0010573	vascular endothelial growth factor production	24	2	0.32	0.0394
Antibody-secreting cells	GO:0040018	positive regulation of multicellular organism growth	24	2	0.32	0.0394
Antibody-secreting cells	GO:0042092	type 2 immune response	24	2	0.32	0.0394
Antibody-secreting cells	GO:2000060	positive regulation of ubiquitin-dependent protein catabolic process	58	3	0.76	0.04088
Antibody-secreting cells	GO:0005975	carbohydrate metabolic process	349	9	4.6	0.0412
Antibody-secreting cells	GO:0006890	retrograde vesicle-mediated transport, Golgi to endoplasmic reticulum	25	2	0.33	0.04247
Antibody-secreting cells	GO:0046633	alpha-beta T cell proliferation	25	2	0.33	0.04247
Antibody-secreting cells	GO:0006888	endoplasmic reticulum to Golgi vesicle-mediated transport	59	3	0.78	0.04267
Antibody-secreting cells	GO:0046631	alpha-beta T cell activation	100	4	1.32	0.04299
Antibody-secreting cells	GO:1903362	regulation of cellular protein catabolic process	171	10	2.25	0.04368
Antibody-secreting cells	GO:0002699	positive regulation of immune effector process	147	5	1.94	0.04485
Antibody-secreting cells	GO:0042149	cellular response to glucose starvation	26	2	0.34	0.04562
Antibody-secreting cells	GO:0032743	positive regulation of interleukin-2 production	26	2	0.34	0.04562
Antibody-secreting cells	GO:0009605	response to external stimulus	1258	30	16.58	0.04645
Antibody-secreting cells	GO:0051100	negative regulation of binding	104	4	1.37	0.04845
Antibody-secreting cells	GO:1903202	negative regulation of oxidative stress-induced cell death	27	2	0.36	0.04885
Antibody-secreting cells	GO:0060135	maternal process involved in female pregnancy	27	2	0.36	0.04885
Antibody-secreting cells	GO:1900408	negative regulation of cellular response to oxidative stress	27	2	0.36	0.04885
Antibody-secreting cells	GO:0061136	regulation of proteasomal protein catabolic process	128	9	1.69	0.04898
Antibody-secreting cells	GO:0009611	response to wounding	253	7	3.33	0.04996
Transitioning B cells	GO:0006620	posttranslational protein targeting to endoplasmic reticulum membrane	6	3	0.14	0.00025
Transitioning B cells	GO:0006487	protein N-linked glycosylation	41	15	0.97	0.00026
Transitioning B cells	GO:0006516	glycoprotein catabolic process	15	4	0.35	0.00034
Transitioning B cells	GO:1901841	regulation of high voltage-gated calcium channel activity	7	3	0.17	0.00043
Transitioning B cells	GO:0043405	regulation of MAP kinase activity	164	12	3.88	0.00051
Transitioning B cells	GO:1902235	regulation of endoplasmic reticulum stress-induced intrinsic apoptotic signaling pathway	24	10	0.57	0.00062
Transitioning B cells	GO:1903909	regulation of receptor clustering	8	3	0.19	0.00067
Transitioning B cells	GO:0002861	regulation of inflammatory response to antigenic stimulus	18	4	0.43	0.00072
Transitioning B cells	GO:1900101	regulation of endoplasmic reticulum unfolded protein response	18	4	0.43	0.00072
Transitioning B cells	GO:0065002	intracellular protein transmembrane transport	31	5	0.73	0.00073
Transitioning B cells	GO:0055117	regulation of cardiac muscle contraction	32	5	0.76	0.00085
Transitioning B cells	GO:0002250	adaptive immune response	185	15	4.38	0.00087
Transitioning B cells	GO:0002313	mature B cell differentiation involved in immune response	19	4	0.45	0.0009
Transitioning B cells	GO:0006958	complement activation, classical pathway	9	3	0.21	0.00099
Transitioning B cells	GO:0070863	positive regulation of protein exit from endoplasmic reticulum	9	3	0.21	0.00099
Transitioning B cells	GO:0002638	negative regulation of immunoglobulin production	9	3	0.21	0.00099
Transitioning B cells	GO:0048193	Golgi vesicle transport	153	11	3.62	0.00101
Transitioning B cells	GO:0007030	Golgi organization	70	7	1.66	0.00128
Transitioning B cells	GO:0046479	glycosphingolipid catabolic process	10	3	0.24	0.00139
Transitioning B cells	GO:0045047	protein targeting to ER	20	9	0.47	0.00156
Transitioning B cells	GO:0019882	antigen processing and presentation	56	6	1.32	0.00199
Transitioning B cells	GO:0071417	cellular response to organonitrogen compound	276	15	6.53	0.00235
Transitioning B cells	GO:0035970	peptidyl-threonine dephosphorylation	12	3	0.28	0.00246
Transitioning B cells	GO:1904294	positive regulation of ERAD pathway	12	3	0.28	0.00246
Transitioning B cells	GO:0035751	regulation of lysosomal lumen pH	12	3	0.28	0.00246
Transitioning B cells	GO:0051924	regulation of calcium ion transport	111	11	2.63	0.00249
Transitioning B cells	GO:0006911	phagocytosis, engulfment	26	4	0.61	0.00303
Transitioning B cells	GO:0030890	positive regulation of B cell proliferation	26	4	0.61	0.00303
Transitioning B cells	GO:1905898	positive regulation of response to endoplasmic reticulum stress	25	6	0.59	0.00304
Transitioning B cells	GO:1903573	negative regulation of response to endoplasmic reticulum stress	43	11	1.02	0.00318
Transitioning B cells	GO:0006040	amino sugar metabolic process	14	3	0.33	0.00392
Transitioning B cells	GO:0006952	defense response	693	31	16.39	0.00418
Transitioning B cells	GO:0001819	positive regulation of cytokine production	297	15	7.02	0.00467
Transitioning B cells	GO:0006910	phagocytosis, recognition	15	3	0.35	0.00482
Transitioning B cells	GO:0042100	B cell proliferation	56	8	1.32	0.00492
Transitioning B cells	GO:0008277	regulation of G protein-coupled receptor signaling pathway	67	6	1.58	0.00493
Transitioning B cells	GO:0050772	positive regulation of axonogenesis	30	4	0.71	0.00516
Transitioning B cells	GO:0043410	positive regulation of MAPK cascade	272	14	6.43	0.00526
Transitioning B cells	GO:0006621	protein retention in ER lumen	5	2	0.12	0.00532
Transitioning B cells	GO:0070292	N-acylphosphatidylethanolamine metabolic process	5	2	0.12	0.00532
Transitioning B cells	GO:0032594	protein transport within lipid bilayer	5	2	0.12	0.00532
Transitioning B cells	GO:0060315	negative regulation of ryanodine-sensitive calcium-release channel activity	5	2	0.12	0.00532
Transitioning B cells	GO:0006491	N-glycan processing	5	2	0.12	0.00532
Transitioning B cells	GO:0019372	lipoxygenase pathway	5	2	0.12	0.00532
Transitioning B cells	GO:0031330	negative regulation of cellular catabolic process	163	10	3.86	0.00534
Transitioning B cells	GO:0006986	response to unfolded protein	66	18	1.56	0.00595
Transitioning B cells	GO:0031295	T cell costimulation	17	3	0.4	0.00695
Transitioning B cells	GO:0043618	regulation of transcription from RNA polymerase II promoter in response to stress	33	4	0.78	0.00729
Transitioning B cells	GO:0009214	cyclic nucleotide catabolic process	6	2	0.14	0.00785
Transitioning B cells	GO:1990456	mitochondrion-endoplasmic reticulum membrane tethering	6	2	0.14	0.00785
Transitioning B cells	GO:1990144	intrinsic apoptotic signaling pathway in response to hypoxia	6	2	0.14	0.00785
Transitioning B cells	GO:0010561	negative regulation of glycoprotein biosynthetic process	6	2	0.14	0.00785
Transitioning B cells	GO:0086103	G protein-coupled receptor signaling pathway involved in heart process	6	2	0.14	0.00785
Transitioning B cells	GO:2000774	positive regulation of cellular senescence	6	2	0.14	0.00785
Transitioning B cells	GO:0036492	eiF2alpha phosphorylation in response to endoplasmic reticulum stress	6	2	0.14	0.00785
Transitioning B cells	GO:0016240	autophagosome membrane docking	6	2	0.14	0.00785
Transitioning B cells	GO:1901077	regulation of relaxation of muscle	6	2	0.14	0.00785
Transitioning B cells	GO:0071222	cellular response to lipopolysaccharide	97	7	2.29	0.00804
Transitioning B cells	GO:0001836	release of cytochrome c from mitochondria	34	4	0.8	0.00812
Transitioning B cells	GO:0045454	cell redox homeostasis	18	3	0.43	0.0082
Transitioning B cells	GO:0032673	regulation of interleukin-4 production	18	3	0.43	0.0082
Transitioning B cells	GO:0042311	vasodilation	18	3	0.43	0.0082
Transitioning B cells	GO:0002931	response to ischemia	18	3	0.43	0.0082
Transitioning B cells	GO:0001776	leukocyte homeostasis	54	5	1.28	0.00876
Transitioning B cells	GO:0032103	positive regulation of response to external stimulus	231	12	5.46	0.00883
Transitioning B cells	GO:0002702	positive regulation of production of molecular mediator of immune response	76	6	1.8	0.00907
Transitioning B cells	GO:0050670	regulation of lymphocyte proliferation	129	12	3.05	0.00934
Transitioning B cells	GO:0042102	positive regulation of T cell proliferation	55	5	1.3	0.00945
Transitioning B cells	GO:0050871	positive regulation of B cell activation	62	8	1.47	0.00949
Transitioning B cells	GO:0032469	endoplasmic reticulum calcium ion homeostasis	19	3	0.45	0.00957
Transitioning B cells	GO:1902042	negative regulation of extrinsic apoptotic signaling pathway via death domain receptors	19	3	0.45	0.00957
Transitioning B cells	GO:0045851	pH reduction	19	3	0.45	0.00957
Transitioning B cells	GO:0043154	negative regulation of cysteine-type endopeptidase activity involved in apoptotic process	36	4	0.85	0.00994
Transitioning B cells	GO:1901652	response to peptide	179	10	4.23	0.01008
Transitioning B cells	GO:0002460	adaptive immune response based on somatic recombination of immune receptors built from immunoglobulin superfamily domains	163	12	3.86	0.01017
Transitioning B cells	GO:0051098	regulation of binding	236	12	5.58	0.01036
Transitioning B cells	GO:0019511	peptidyl-proline hydroxylation	7	2	0.17	0.01082
Transitioning B cells	GO:0055119	relaxation of cardiac muscle	7	2	0.17	0.01082
Transitioning B cells	GO:1900038	negative regulation of cellular response to hypoxia	7	2	0.17	0.01082
Transitioning B cells	GO:0002862	negative regulation of inflammatory response to antigenic stimulus	7	2	0.17	0.01082
Transitioning B cells	GO:0002864	regulation of acute inflammatory response to antigenic stimulus	7	2	0.17	0.01082
Transitioning B cells	GO:0045577	regulation of B cell differentiation	20	3	0.47	0.01107
Transitioning B cells	GO:0002252	immune effector process	425	29	10.05	0.01146
Transitioning B cells	GO:0051928	positive regulation of calcium ion transport	58	5	1.37	0.01176
Transitioning B cells	GO:0051241	negative regulation of multicellular organismal process	654	25	15.47	0.01192
Transitioning B cells	GO:0051607	defense response to virus	130	8	3.07	0.01197
Transitioning B cells	GO:2001235	positive regulation of apoptotic signaling pathway	106	7	2.51	0.01277
Transitioning B cells	GO:1900076	regulation of cellular response to insulin stimulus	39	4	0.92	0.01313
Transitioning B cells	GO:0045861	negative regulation of proteolysis	144	11	3.41	0.01319
Transitioning B cells	GO:0002456	T cell mediated immunity	60	5	1.42	0.0135
Transitioning B cells	GO:0034976	response to endoplasmic reticulum stress	174	34	4.12	0.01355
Transitioning B cells	GO:0051707	response to other organism	603	27	14.26	0.01403
Transitioning B cells	GO:0051574	positive regulation of histone H3-K9 methylation	8	2	0.19	0.0142
Transitioning B cells	GO:1904153	negative regulation of retrograde protein transport, ER to cytosol	8	2	0.19	0.0142
Transitioning B cells	GO:0042994	cytoplasmic sequestering of transcription factor	8	2	0.19	0.0142
Transitioning B cells	GO:0007042	lysosomal lumen acidification	8	2	0.19	0.0142
Transitioning B cells	GO:1900103	positive regulation of endoplasmic reticulum unfolded protein response	8	2	0.19	0.0142
Transitioning B cells	GO:0010984	regulation of lipoprotein particle clearance	8	2	0.19	0.0142
Transitioning B cells	GO:0043207	response to external biotic stimulus	604	27	14.29	0.01431
Transitioning B cells	GO:0043407	negative regulation of MAP kinase activity	40	4	0.95	0.01433
Transitioning B cells	GO:0009991	response to extracellular stimulus	189	10	4.47	0.01436
Transitioning B cells	GO:0042698	ovulation cycle	22	3	0.52	0.01444
Transitioning B cells	GO:0046640	regulation of alpha-beta T cell proliferation	22	3	0.52	0.01444
Transitioning B cells	GO:0009605	response to external stimulus	1258	50	29.75	0.01489
Transitioning B cells	GO:0048639	positive regulation of developmental growth	85	6	2.01	0.01524
Transitioning B cells	GO:0002573	myeloid leukocyte differentiation	137	8	3.24	0.01602
Transitioning B cells	GO:0048002	antigen processing and presentation of peptide antigen	23	3	0.54	0.01632
Transitioning B cells	GO:1905477	positive regulation of protein localization to membrane	63	5	1.49	0.01641
Transitioning B cells	GO:0043434	response to peptide hormone	139	8	3.29	0.01734
Transitioning B cells	GO:0030316	osteoclast differentiation	64	5	1.51	0.01747
Transitioning B cells	GO:0031647	regulation of protein stability	195	10	4.61	0.01752
Transitioning B cells	GO:0030323	respiratory tube development	113	7	2.67	0.01764
Transitioning B cells	GO:1903706	regulation of hemopoiesis	254	12	6.01	0.01765
Transitioning B cells	GO:0016485	protein processing	122	11	2.89	0.01785
Transitioning B cells	GO:0006517	protein deglycosylation	9	2	0.21	0.01798
Transitioning B cells	GO:0043129	surfactant homeostasis	9	2	0.21	0.01798
Transitioning B cells	GO:0002863	positive regulation of inflammatory response to antigenic stimulus	9	2	0.21	0.01798
Transitioning B cells	GO:0051923	sulfation	9	2	0.21	0.01798
Transitioning B cells	GO:0070862	negative regulation of protein exit from endoplasmic reticulum	9	2	0.21	0.01798
Transitioning B cells	GO:0032663	regulation of interleukin-2 production	43	4	1.02	0.01831
Transitioning B cells	GO:0032623	interleukin-2 production	43	4	1.02	0.01831
Transitioning B cells	GO:0032963	collagen metabolic process	43	4	1.02	0.01831
Transitioning B cells	GO:0032868	response to insulin	114	7	2.7	0.01843
Transitioning B cells	GO:0044419	interspecies interaction between organisms	755	31	17.86	0.01848
Transitioning B cells	GO:0045185	maintenance of protein location	49	6	1.16	0.0193
Transitioning B cells	GO:0043393	regulation of protein binding	142	8	3.36	0.01946
Transitioning B cells	GO:0009607	response to biotic stimulus	634	30	15	0.01968
Transitioning B cells	GO:0043200	response to amino acid	44	4	1.04	0.01978
Transitioning B cells	GO:0006890	retrograde vesicle-mediated transport, Golgi to endoplasmic reticulum	25	3	0.59	0.02048
Transitioning B cells	GO:0001541	ovarian follicle development	25	3	0.59	0.02048
Transitioning B cells	GO:0046633	alpha-beta T cell proliferation	25	3	0.59	0.02048
Transitioning B cells	GO:0002455	humoral immune response mediated by circulating immunoglobulin	19	5	0.45	0.02167
Transitioning B cells	GO:0031667	response to nutrient levels	173	9	4.09	0.02173
Transitioning B cells	GO:0043406	positive regulation of MAP kinase activity	118	7	2.79	0.02183
Transitioning B cells	GO:0045619	regulation of lymphocyte differentiation	118	7	2.79	0.02183
Transitioning B cells	GO:0002438	acute inflammatory response to antigenic stimulus	10	2	0.24	0.02212
Transitioning B cells	GO:0097066	response to thyroid hormone	10	2	0.24	0.02212
Transitioning B cells	GO:0097067	cellular response to thyroid hormone stimulus	10	2	0.24	0.02212
Transitioning B cells	GO:1900037	regulation of cellular response to hypoxia	10	2	0.24	0.02212
Transitioning B cells	GO:0030252	growth hormone secretion	10	2	0.24	0.02212
Transitioning B cells	GO:0016486	peptide hormone processing	10	2	0.24	0.02212
Transitioning B cells	GO:0010614	negative regulation of cardiac muscle hypertrophy	10	2	0.24	0.02212
Transitioning B cells	GO:0007035	vacuolar acidification	10	2	0.24	0.02212
Transitioning B cells	GO:0014741	negative regulation of muscle hypertrophy	10	2	0.24	0.02212
Transitioning B cells	GO:0050728	negative regulation of inflammatory response	93	6	2.2	0.02275
Transitioning B cells	GO:0048286	lung alveolus development	26	3	0.61	0.02275
Transitioning B cells	GO:0045744	negative regulation of G protein-coupled receptor signaling pathway	26	3	0.61	0.02275
Transitioning B cells	GO:0032743	positive regulation of interleukin-2 production	26	3	0.61	0.02275
Transitioning B cells	GO:0060323	head morphogenesis	26	3	0.61	0.02275
Transitioning B cells	GO:0042149	cellular response to glucose starvation	26	3	0.61	0.02275
Transitioning B cells	GO:0032411	positive regulation of transporter activity	46	4	1.09	0.02293
Transitioning B cells	GO:0071375	cellular response to peptide hormone stimulus	120	7	2.84	0.02368
Transitioning B cells	GO:0009617	response to bacterium	276	16	6.53	0.02369
Transitioning B cells	GO:1901700	response to oxygen-containing compound	701	29	16.58	0.02394
Transitioning B cells	GO:1901653	cellular response to peptide	148	8	3.5	0.02426
Transitioning B cells	GO:0008585	female gonad development	47	4	1.11	0.02461
Transitioning B cells	GO:0071479	cellular response to ionizing radiation	47	4	1.11	0.02461
Transitioning B cells	GO:0050729	positive regulation of inflammatory response	70	5	1.66	0.02477
Transitioning B cells	GO:0006959	humoral immune response	80	8	1.89	0.02508
Transitioning B cells	GO:0032269	negative regulation of cellular protein metabolic process	570	24	13.48	0.02511
Transitioning B cells	GO:0030217	T cell differentiation	178	9	4.21	0.02556
Transitioning B cells	GO:0042981	regulation of apoptotic process	812	40	19.21	0.02557
Transitioning B cells	GO:0043270	positive regulation of ion transport	122	7	2.89	0.02564
Transitioning B cells	GO:2001233	regulation of apoptotic signaling pathway	259	22	6.13	0.02641
Transitioning B cells	GO:0002474	antigen processing and presentation of peptide antigen via MHC class I	11	2	0.26	0.02662
Transitioning B cells	GO:0048199	vesicle targeting, to, from or within Golgi	11	2	0.26	0.02662
Transitioning B cells	GO:0071875	adrenergic receptor signaling pathway	11	2	0.26	0.02662
Transitioning B cells	GO:0006677	glycosylceramide metabolic process	11	2	0.26	0.02662
Transitioning B cells	GO:0098760	response to interleukin-7	11	2	0.26	0.02662
Transitioning B cells	GO:0098761	cellular response to interleukin-7	11	2	0.26	0.02662
Transitioning B cells	GO:0048875	chemical homeostasis within a tissue	11	2	0.26	0.02662
Transitioning B cells	GO:0010880	regulation of release of sequestered calcium ion into cytosol by sarcoplasmic reticulum	11	2	0.26	0.02662
Transitioning B cells	GO:0045651	positive regulation of macrophage differentiation	11	2	0.26	0.02662
Transitioning B cells	GO:0033194	response to hydroperoxide	11	2	0.26	0.02662
Transitioning B cells	GO:0036498	IRE1-mediated unfolded protein response	11	2	0.26	0.02662
Transitioning B cells	GO:0043951	negative regulation of cAMP-mediated signaling	11	2	0.26	0.02662
Transitioning B cells	GO:0050900	leukocyte migration	209	10	4.94	0.02682
Transitioning B cells	GO:0051403	stress-activated MAPK cascade	151	8	3.57	0.02694
Transitioning B cells	GO:0032091	negative regulation of protein binding	72	5	1.7	0.02758
Transitioning B cells	GO:0035307	positive regulation of protein dephosphorylation	28	3	0.66	0.0277
Transitioning B cells	GO:0032147	activation of protein kinase activity	124	7	2.93	0.02771
Transitioning B cells	GO:1902105	regulation of leukocyte differentiation	181	9	4.28	0.02807
Transitioning B cells	GO:2000379	positive regulation of reactive oxygen species metabolic process	49	4	1.16	0.02819
Transitioning B cells	GO:0010507	negative regulation of autophagy	49	4	1.16	0.02819
Transitioning B cells	GO:0046545	development of primary female sexual characteristics	49	4	1.16	0.02819
Transitioning B cells	GO:0032870	cellular response to hormone stimulus	272	12	6.43	0.02826
Transitioning B cells	GO:0032869	cellular response to insulin stimulus	98	6	2.32	0.02854
Transitioning B cells	GO:0060541	respiratory system development	125	7	2.96	0.02879
Transitioning B cells	GO:0010941	regulation of cell death	896	42	21.19	0.02917
Transitioning B cells	GO:0098542	defense response to other organism	402	16	9.51	0.02928
Transitioning B cells	GO:0072593	reactive oxygen species metabolic process	154	8	3.64	0.02982
Transitioning B cells	GO:1902229	regulation of intrinsic apoptotic signaling pathway in response to DNA damage	29	3	0.69	0.03037
Transitioning B cells	GO:0031098	stress-activated protein kinase signaling cascade	155	8	3.67	0.03083
Transitioning B cells	GO:0046631	alpha-beta T cell activation	100	6	2.37	0.0311
Transitioning B cells	GO:0009628	response to abiotic stimulus	516	21	12.2	0.03143
Transitioning B cells	GO:0140448	signaling receptor ligand precursor processing	12	2	0.28	0.03146
Transitioning B cells	GO:0050862	positive regulation of T cell receptor signaling pathway	12	2	0.28	0.03146
Transitioning B cells	GO:0007039	protein catabolic process in the vacuole	12	2	0.28	0.03146
Transitioning B cells	GO:0046641	positive regulation of alpha-beta T cell proliferation	12	2	0.28	0.03146
Transitioning B cells	GO:0048385	regulation of retinoic acid receptor signaling pathway	12	2	0.28	0.03146
Transitioning B cells	GO:0051604	protein maturation	166	12	3.93	0.03249
Transitioning B cells	GO:0035335	peptidyl-tyrosine dephosphorylation	30	3	0.71	0.03317
Transitioning B cells	GO:0043067	regulation of programmed cell death	831	40	19.65	0.03335
Transitioning B cells	GO:0042594	response to starvation	103	6	2.44	0.03522
Transitioning B cells	GO:0071478	cellular response to radiation	103	6	2.44	0.03522
Transitioning B cells	GO:0048513	animal organ development	1731	55	40.94	0.03524
Transitioning B cells	GO:0070588	calcium ion transmembrane transport	142	10	3.36	0.03529
Transitioning B cells	GO:2001236	regulation of extrinsic apoptotic signaling pathway	97	8	2.29	0.03583
Transitioning B cells	GO:0038066	p38MAPK cascade	31	3	0.73	0.0361
Transitioning B cells	GO:0018208	peptidyl-proline modification	31	3	0.73	0.0361
Transitioning B cells	GO:0009988	cell-cell recognition	31	3	0.73	0.0361
Transitioning B cells	GO:0007029	endoplasmic reticulum organization	53	4	1.25	0.03624
Transitioning B cells	GO:0090201	negative regulation of release of cytochrome c from mitochondria	13	2	0.31	0.0366
Transitioning B cells	GO:0014808	release of sequestered calcium ion into cytosol by sarcoplasmic reticulum	13	2	0.31	0.0366
Transitioning B cells	GO:0002407	dendritic cell chemotaxis	13	2	0.31	0.0366
Transitioning B cells	GO:0060055	angiogenesis involved in wound healing	13	2	0.31	0.0366
Transitioning B cells	GO:1904293	negative regulation of ERAD pathway	13	2	0.31	0.0366
Transitioning B cells	GO:0032516	positive regulation of phosphoprotein phosphatase activity	13	2	0.31	0.0366
Transitioning B cells	GO:0030574	collagen catabolic process	13	2	0.31	0.0366
Transitioning B cells	GO:0045932	negative regulation of muscle contraction	13	2	0.31	0.0366
Transitioning B cells	GO:0051220	cytoplasmic sequestering of protein	13	2	0.31	0.0366
Transitioning B cells	GO:0009725	response to hormone	315	13	7.45	0.03663
Transitioning B cells	GO:0050864	regulation of B cell activation	94	11	2.22	0.03666
Transitioning B cells	GO:0051100	negative regulation of binding	104	6	2.46	0.03667
Transitioning B cells	GO:0051248	negative regulation of protein metabolic process	603	26	14.26	0.03668
Transitioning B cells	GO:0006909	phagocytosis	112	9	2.65	0.03719
Transitioning B cells	GO:0009615	response to virus	191	9	4.52	0.0377
Transitioning B cells	GO:0010647	positive regulation of cell communication	950	37	22.47	0.038
Transitioning B cells	GO:0010332	response to gamma radiation	32	3	0.76	0.03916
Transitioning B cells	GO:0034113	heterotypic cell-cell adhesion	32	3	0.76	0.03916
Transitioning B cells	GO:0042110	T cell activation	292	15	6.91	0.0401
Transitioning B cells	GO:0023056	positive regulation of signaling	954	37	22.56	0.0402
Transitioning B cells	GO:0031664	regulation of lipopolysaccharide-mediated signaling pathway	14	2	0.33	0.04205
Transitioning B cells	GO:1903514	release of sequestered calcium ion into cytosol by endoplasmic reticulum	14	2	0.33	0.04205
Transitioning B cells	GO:0070296	sarcoplasmic reticulum calcium ion transport	14	2	0.33	0.04205
Transitioning B cells	GO:0032069	regulation of nuclease activity	14	2	0.33	0.04205
Transitioning B cells	GO:0010955	negative regulation of protein processing	14	2	0.33	0.04205
Transitioning B cells	GO:1903318	negative regulation of protein maturation	14	2	0.33	0.04205
Transitioning B cells	GO:0006783	heme biosynthetic process	14	2	0.33	0.04205
Transitioning B cells	GO:0002376	immune system process	1372	67	32.45	0.04218
Transitioning B cells	GO:0002711	positive regulation of T cell mediated immunity	33	3	0.78	0.04235
Transitioning B cells	GO:0070613	regulation of protein processing	33	3	0.78	0.04235
Transitioning B cells	GO:0031668	cellular response to extracellular stimulus	136	7	3.22	0.04252
Transitioning B cells	GO:0046660	female sex differentiation	56	4	1.32	0.04306
Transitioning B cells	GO:0051050	positive regulation of transport	438	19	10.36	0.04441
Transitioning B cells	GO:0030099	myeloid cell differentiation	260	11	6.15	0.04492
Transitioning B cells	GO:0000187	activation of MAPK activity	57	4	1.35	0.04549
Transitioning B cells	GO:0007585	respiratory gaseous exchange by respiratory system	34	3	0.8	0.04566
Transitioning B cells	GO:1902373	negative regulation of mRNA catabolic process	34	3	0.8	0.04566
Transitioning B cells	GO:1903317	regulation of protein maturation	34	3	0.8	0.04566
Transitioning B cells	GO:0071496	cellular response to external stimulus	168	8	3.97	0.04609
Transitioning B cells	GO:0030324	lung development	110	6	2.6	0.04615
Transitioning B cells	GO:0010523	negative regulation of calcium ion transport into cytosol	7	3	0.17	0.0464
Transitioning B cells	GO:1903019	negative regulation of glycoprotein metabolic process	8	3	0.19	0.04641
Transitioning B cells	GO:0090343	positive regulation of cell aging	8	3	0.19	0.04641
Transitioning B cells	GO:0030888	regulation of B cell proliferation	41	6	0.97	0.04663
Transitioning B cells	GO:0060326	cell chemotaxis	169	8	4	0.04744
Transitioning B cells	GO:0045773	positive regulation of axon extension	15	2	0.35	0.04778
Transitioning B cells	GO:0032753	positive regulation of interleukin-4 production	15	2	0.35	0.04778
Transitioning B cells	GO:0050855	regulation of B cell receptor signaling pathway	15	2	0.35	0.04778
Transitioning B cells	GO:1903077	negative regulation of protein localization to plasma membrane	15	2	0.35	0.04778
Transitioning B cells	GO:0019369	arachidonic acid metabolic process	15	2	0.35	0.04778
Transitioning B cells	GO:0046514	ceramide catabolic process	15	2	0.35	0.04778
Transitioning B cells	GO:0043949	regulation of cAMP-mediated signaling	15	2	0.35	0.04778
Transitioning B cells	GO:0043901	negative regulation of multi-organism process	15	2	0.35	0.04778
Transitioning B cells	GO:0045069	regulation of viral genome replication	58	4	1.37	0.04799
Transitioning B cells	GO:0010171	body morphogenesis	35	3	0.83	0.0491
Resting B cells	GO:0022614	membrane to membrane docking	5	3	0.13	0.00015
Resting B cells	GO:0061158	3'-UTR-mediated mRNA destabilization	12	4	0.3	0.00017
Resting B cells	GO:0035458	cellular response to interferon-beta	12	4	0.3	0.00017
Resting B cells	GO:0006955	immune response	739	55	18.72	0.00018
Resting B cells	GO:0071353	cellular response to interleukin-4	22	5	0.56	0.00019
Resting B cells	GO:0071356	cellular response to tumor necrosis factor	99	10	2.51	0.0002
Resting B cells	GO:0002335	mature B cell differentiation	24	5	0.61	0.00029
Resting B cells	GO:0019886	antigen processing and presentation of exogenous peptide antigen via MHC class II	6	3	0.15	0.0003
Resting B cells	GO:1903753	negative regulation of p38MAPK cascade	6	3	0.15	0.0003
Resting B cells	GO:0016064	immunoglobulin mediated immune response	71	8	1.8	0.00041
Resting B cells	GO:0060333	interferon-gamma-mediated signaling pathway	15	4	0.38	0.00044
Resting B cells	GO:0071385	cellular response to glucocorticoid stimulus	15	4	0.38	0.00044
Resting B cells	GO:0032715	negative regulation of interleukin-6 production	27	5	0.68	0.00051
Resting B cells	GO:0045647	negative regulation of erythrocyte differentiation	7	3	0.18	0.00052
Resting B cells	GO:0050728	negative regulation of inflammatory response	93	9	2.36	0.00056
Resting B cells	GO:0032495	response to muramyl dipeptide	16	4	0.41	0.00058
Resting B cells	GO:0030217	T cell differentiation	178	13	4.51	0.00059
Resting B cells	GO:0048525	negative regulation of viral process	60	7	1.52	0.00076
Resting B cells	GO:0071222	cellular response to lipopolysaccharide	97	9	2.46	0.00077
Resting B cells	GO:0019885	antigen processing and presentation of endogenous peptide antigen via MHC class I	8	3	0.2	0.00082
Resting B cells	GO:0032728	positive regulation of interferon-beta production	30	5	0.76	0.00085
Resting B cells	GO:0002861	regulation of inflammatory response to antigenic stimulus	18	4	0.46	0.00093
Resting B cells	GO:0032727	positive regulation of interferon-alpha production	18	4	0.46	0.00093
Resting B cells	GO:0001959	regulation of cytokine-mediated signaling pathway	81	8	2.05	0.00099
Resting B cells	GO:0097193	intrinsic apoptotic signaling pathway	200	17	5.07	0.00101
Resting B cells	GO:0030316	osteoclast differentiation	64	7	1.62	0.00112
Resting B cells	GO:0042771	intrinsic apoptotic signaling pathway in response to DNA damage by p53 class mediator	32	5	0.81	0.00116
Resting B cells	GO:1902042	negative regulation of extrinsic apoptotic signaling pathway via death domain receptors	19	4	0.48	0.00116
Resting B cells	GO:0001771	immunological synapse formation	9	3	0.23	0.00121
Resting B cells	GO:0002822	regulation of adaptive immune response based on somatic recombination of immune receptors built from immunoglobulin superfamily domains	105	9	2.66	0.00136
Resting B cells	GO:0045687	positive regulation of glial cell differentiation	20	4	0.51	0.00142
Resting B cells	GO:0071260	cellular response to mechanical stimulus	34	5	0.86	0.00153
Resting B cells	GO:0030097	hemopoiesis	546	39	13.83	0.00164
Resting B cells	GO:0050778	positive regulation of immune response	297	20	7.52	0.00165
Resting B cells	GO:0070262	peptidyl-serine dephosphorylation	10	3	0.25	0.00169
Resting B cells	GO:0031397	negative regulation of protein ubiquitination	52	6	1.32	0.00192
Resting B cells	GO:2001238	positive regulation of extrinsic apoptotic signaling pathway	36	5	0.91	0.00199
Resting B cells	GO:0043154	negative regulation of cysteine-type endopeptidase activity involved in apoptotic process	36	5	0.91	0.00199
Resting B cells	GO:0050869	negative regulation of B cell activation	22	4	0.56	0.00206
Resting B cells	GO:0001819	positive regulation of cytokine production	297	21	7.52	0.00221
Resting B cells	GO:0032691	negative regulation of interleukin-1 beta production	11	3	0.28	0.00228
Resting B cells	GO:0002764	immune response-regulating signaling pathway	125	12	3.17	0.00237
Resting B cells	GO:0034599	cellular response to oxidative stress	159	11	4.03	0.00237
Resting B cells	GO:0050731	positive regulation of peptidyl-tyrosine phosphorylation	93	8	2.36	0.00243
Resting B cells	GO:0045944	positive regulation of transcription by RNA polymerase II	714	33	18.09	0.00255
Resting B cells	GO:0044092	negative regulation of molecular function	558	33	14.14	0.00272
Resting B cells	GO:0051172	negative regulation of nitrogen compound metabolic process	1329	67	33.67	0.00279
Resting B cells	GO:0002260	lymphocyte homeostasis	39	5	0.99	0.00286
Resting B cells	GO:0035970	peptidyl-threonine dephosphorylation	12	3	0.3	0.00299
Resting B cells	GO:0038066	p38MAPK cascade	31	7	0.79	0.00322
Resting B cells	GO:0045087	innate immune response	265	20	6.71	0.00346
Resting B cells	GO:0030888	regulation of B cell proliferation	41	5	1.04	0.00357
Resting B cells	GO:0048008	platelet-derived growth factor receptor signaling pathway	41	5	1.04	0.00357
Resting B cells	GO:0042129	regulation of T cell proliferation	99	8	2.51	0.00358
Resting B cells	GO:0002495	antigen processing and presentation of peptide antigen via MHC class II	10	5	0.25	0.00363
Resting B cells	GO:0035994	response to muscle stretch	13	3	0.33	0.00381
Resting B cells	GO:1901798	positive regulation of signal transduction by p53 class mediator	13	3	0.33	0.00381
Resting B cells	GO:0032516	positive regulation of phosphoprotein phosphatase activity	13	3	0.33	0.00381
Resting B cells	GO:0032695	negative regulation of interleukin-12 production	13	3	0.33	0.00381
Resting B cells	GO:0002456	T cell mediated immunity	60	6	1.52	0.00398
Resting B cells	GO:0071345	cellular response to cytokine stimulus	419	37	10.62	0.00408
Resting B cells	GO:0031324	negative regulation of cellular metabolic process	1453	70	36.81	0.00417
Resting B cells	GO:0002312	B cell activation involved in immune response	61	6	1.55	0.00432
Resting B cells	GO:0050864	regulation of B cell activation	94	12	2.38	0.00445
Resting B cells	GO:0072595	maintenance of protein localization in organelle	27	4	0.68	0.00447
Resting B cells	GO:0032922	circadian regulation of gene expression	44	5	1.11	0.00487
Resting B cells	GO:0009617	response to bacterium	276	20	6.99	0.00487
Resting B cells	GO:0080135	regulation of cellular response to stress	459	24	11.63	0.00493
Resting B cells	GO:1902532	negative regulation of intracellular signal transduction	333	21	8.44	0.00504
Resting B cells	GO:0060337	type I interferon signaling pathway	28	4	0.71	0.00511
Resting B cells	GO:0000122	negative regulation of transcription by RNA polymerase II	509	23	12.9	0.00514
Resting B cells	GO:0048584	positive regulation of response to stimulus	1221	64	30.93	0.0053
Resting B cells	GO:0045446	endothelial cell differentiation	64	6	1.62	0.00548
Resting B cells	GO:0010761	fibroblast migration	29	4	0.73	0.00581
Resting B cells	GO:0071243	cellular response to arsenic-containing substance	15	3	0.38	0.00584
Resting B cells	GO:0043153	entrainment of circadian clock by photoperiod	15	3	0.38	0.00584
Resting B cells	GO:0002693	positive regulation of cellular extravasation	15	3	0.38	0.00584
Resting B cells	GO:0045598	regulation of fat cell differentiation	86	7	2.18	0.00606
Resting B cells	GO:0019062	virion attachment to host cell	5	2	0.13	0.00608
Resting B cells	GO:0002583	regulation of antigen processing and presentation of peptide antigen	5	2	0.13	0.00608
Resting B cells	GO:0002579	positive regulation of antigen processing and presentation	5	2	0.13	0.00608
Resting B cells	GO:0032594	protein transport within lipid bilayer	5	2	0.13	0.00608
Resting B cells	GO:0008216	spermidine metabolic process	5	2	0.13	0.00608
Resting B cells	GO:0045988	negative regulation of striated muscle contraction	5	2	0.13	0.00608
Resting B cells	GO:0019372	lipoxygenase pathway	5	2	0.13	0.00608
Resting B cells	GO:0071316	cellular response to nicotine	5	2	0.13	0.00608
Resting B cells	GO:0032020	ISG15-protein conjugation	5	2	0.13	0.00608
Resting B cells	GO:2000643	positive regulation of early endosome to late endosome transport	5	2	0.13	0.00608
Resting B cells	GO:0002683	negative regulation of immune system process	277	24	7.02	0.00639
Resting B cells	GO:0010035	response to inorganic substance	207	12	5.24	0.00645
Resting B cells	GO:1903798	regulation of production of miRNAs involved in gene silencing by miRNA	16	3	0.41	0.00705
Resting B cells	GO:0070306	lens fiber cell differentiation	16	3	0.41	0.00705
Resting B cells	GO:0048741	skeletal muscle fiber development	16	3	0.41	0.00705
Resting B cells	GO:1901223	negative regulation of NIK/NF-kappaB signaling	16	3	0.41	0.00705
Resting B cells	GO:0032703	negative regulation of interleukin-2 production	16	3	0.41	0.00705
Resting B cells	GO:0043433	negative regulation of DNA-binding transcription factor activity	111	8	2.81	0.00713
Resting B cells	GO:0045088	regulation of innate immune response	111	8	2.81	0.00713
Resting B cells	GO:0022409	positive regulation of cell-cell adhesion	153	12	3.88	0.00723
Resting B cells	GO:1990869	cellular response to chemokine	31	4	0.79	0.0074
Resting B cells	GO:0022603	regulation of anatomical structure morphogenesis	556	24	14.09	0.00748
Resting B cells	GO:0007159	leukocyte cell-cell adhesion	216	19	5.47	0.00768
Resting B cells	GO:0051726	regulation of cell cycle	621	26	15.73	0.00801
Resting B cells	GO:0050777	negative regulation of immune response	91	7	2.31	0.00821
Resting B cells	GO:0043331	response to dsRNA	32	4	0.81	0.00829
Resting B cells	GO:2000351	regulation of endothelial cell apoptotic process	32	4	0.81	0.00829
Resting B cells	GO:0055117	regulation of cardiac muscle contraction	32	4	0.81	0.00829
Resting B cells	GO:0060324	face development	32	4	0.81	0.00829
Resting B cells	GO:0090023	positive regulation of neutrophil chemotaxis	17	3	0.43	0.0084
Resting B cells	GO:0031295	T cell costimulation	17	3	0.43	0.0084
Resting B cells	GO:0034114	regulation of heterotypic cell-cell adhesion	17	3	0.43	0.0084
Resting B cells	GO:0048384	retinoic acid receptor signaling pathway	17	3	0.43	0.0084
Resting B cells	GO:0002703	regulation of leukocyte mediated immunity	138	9	3.5	0.00841
Resting B cells	GO:0002761	regulation of myeloid leukocyte differentiation	70	6	1.77	0.00846
Resting B cells	GO:0050729	positive regulation of inflammatory response	70	6	1.77	0.00846
Resting B cells	GO:0050852	T cell receptor signaling pathway	70	6	1.77	0.00846
Resting B cells	GO:0045639	positive regulation of myeloid cell differentiation	70	6	1.77	0.00846
Resting B cells	GO:0002468	dendritic cell antigen processing and presentation	6	2	0.15	0.00897
Resting B cells	GO:0002291	T cell activation via T cell receptor contact with antigen bound to MHC molecule on antigen presenting cell	6	2	0.15	0.00897
Resting B cells	GO:0070427	nucleotide-binding oligomerization domain containing 1 signaling pathway	6	2	0.15	0.00897
Resting B cells	GO:0097011	cellular response to granulocyte macrophage colony-stimulating factor stimulus	6	2	0.15	0.00897
Resting B cells	GO:0002578	negative regulation of antigen processing and presentation	6	2	0.15	0.00897
Resting B cells	GO:0008298	intracellular mRNA localization	6	2	0.15	0.00897
Resting B cells	GO:0002676	regulation of chronic inflammatory response	6	2	0.15	0.00897
Resting B cells	GO:0061061	muscle structure development	292	17	7.4	0.00982
Resting B cells	GO:0043403	skeletal muscle tissue regeneration	18	3	0.46	0.0099
Resting B cells	GO:0036003	positive regulation of transcription from RNA polymerase II promoter in response to stress	18	3	0.46	0.0099
Resting B cells	GO:0045619	regulation of lymphocyte differentiation	118	8	2.99	0.01017
Resting B cells	GO:0009890	negative regulation of biosynthetic process	868	42	21.99	0.01023
Resting B cells	GO:0043086	negative regulation of catalytic activity	344	20	8.71	0.01038
Resting B cells	GO:0002768	immune response-regulating cell surface receptor signaling pathway	124	11	3.14	0.01085
Resting B cells	GO:0009913	epidermal cell differentiation	96	7	2.43	0.01088
Resting B cells	GO:0002824	positive regulation of adaptive immune response based on somatic recombination of immune receptors built from immunoglobulin superfamily domains	74	6	1.87	0.01099
Resting B cells	GO:0043620	regulation of DNA-templated transcription in response to stress	37	6	0.94	0.01125
Resting B cells	GO:1903706	regulation of hemopoiesis	254	19	6.43	0.01141
Resting B cells	GO:0002313	mature B cell differentiation involved in immune response	19	3	0.48	0.01154
Resting B cells	GO:0002455	humoral immune response mediated by circulating immunoglobulin	19	3	0.48	0.01154
Resting B cells	GO:2000352	negative regulation of endothelial cell apoptotic process	19	3	0.48	0.01154
Resting B cells	GO:0045589	regulation of regulatory T cell differentiation	19	3	0.48	0.01154
Resting B cells	GO:0036473	cell death in response to oxidative stress	54	5	1.37	0.01157
Resting B cells	GO:0002460	adaptive immune response based on somatic recombination of immune receptors built from immunoglobulin superfamily domains	163	18	4.13	0.01185
Resting B cells	GO:1903037	regulation of leukocyte cell-cell adhesion	190	13	4.81	0.01187
Resting B cells	GO:0009967	positive regulation of signal transduction	872	39	22.09	0.01191
Resting B cells	GO:0048514	blood vessel morphogenesis	338	16	8.56	0.01221
Resting B cells	GO:1990440	positive regulation of transcription from RNA polymerase II promoter in response to endoplasmic reticulum stress	7	2	0.18	0.01235
Resting B cells	GO:0048711	positive regulation of astrocyte differentiation	7	2	0.18	0.01235
Resting B cells	GO:1902965	regulation of protein localization to early endosome	7	2	0.18	0.01235
Resting B cells	GO:1902966	positive regulation of protein localization to early endosome	7	2	0.18	0.01235
Resting B cells	GO:0002862	negative regulation of inflammatory response to antigenic stimulus	7	2	0.18	0.01235
Resting B cells	GO:1901841	regulation of high voltage-gated calcium channel activity	7	2	0.18	0.01235
Resting B cells	GO:0099170	postsynaptic modulation of chemical synaptic transmission	7	2	0.18	0.01235
Resting B cells	GO:1904667	negative regulation of ubiquitin protein ligase activity	7	2	0.18	0.01235
Resting B cells	GO:2000630	positive regulation of miRNA metabolic process	7	2	0.18	0.01235
Resting B cells	GO:0002699	positive regulation of immune effector process	147	9	3.72	0.01243
Resting B cells	GO:0000302	response to reactive oxygen species	99	7	2.51	0.01275
Resting B cells	GO:0002821	positive regulation of adaptive immune response	77	6	1.95	0.01322
Resting B cells	GO:0045730	respiratory burst	20	3	0.51	0.01332
Resting B cells	GO:0045577	regulation of B cell differentiation	20	3	0.51	0.01332
Resting B cells	GO:0060325	face morphogenesis	20	3	0.51	0.01332
Resting B cells	GO:0036475	neuron death in response to oxidative stress	20	3	0.51	0.01332
Resting B cells	GO:0046631	alpha-beta T cell activation	100	7	2.53	0.01342
Resting B cells	GO:0002440	production of molecular mediator of immune response	124	8	3.14	0.01346
Resting B cells	GO:0002763	positive regulation of myeloid leukocyte differentiation	37	4	0.94	0.0138
Resting B cells	GO:0045670	regulation of osteoclast differentiation	37	4	0.94	0.0138
Resting B cells	GO:0006446	regulation of translational initiation	37	4	0.94	0.0138
Resting B cells	GO:0042176	regulation of protein catabolic process	257	13	6.51	0.01386
Resting B cells	GO:1902533	positive regulation of intracellular signal transduction	543	25	13.76	0.01403
Resting B cells	GO:0002367	cytokine production involved in immune response	57	5	1.44	0.01441
Resting B cells	GO:0071774	response to fibroblast growth factor	57	5	1.44	0.01441
Resting B cells	GO:0002718	regulation of cytokine production involved in immune response	57	5	1.44	0.01441
Resting B cells	GO:0044344	cellular response to fibroblast growth factor stimulus	57	5	1.44	0.01441
Resting B cells	GO:0010628	positive regulation of gene expression	1369	61	34.68	0.01468
Resting B cells	GO:0051251	positive regulation of lymphocyte activation	170	12	4.31	0.01494
Resting B cells	GO:0035914	skeletal muscle cell differentiation	38	4	0.96	0.01512
Resting B cells	GO:0046427	positive regulation of receptor signaling pathway via JAK-STAT	38	4	0.96	0.01512
Resting B cells	GO:0001960	negative regulation of cytokine-mediated signaling pathway	38	4	0.96	0.01512
Resting B cells	GO:0060760	positive regulation of response to cytokine stimulus	38	4	0.96	0.01512
Resting B cells	GO:0042594	response to starvation	103	7	2.61	0.01559
Resting B cells	GO:1902107	positive regulation of leukocyte differentiation	103	7	2.61	0.01559
Resting B cells	GO:0051248	negative regulation of protein metabolic process	603	38	15.28	0.01597
Resting B cells	GO:0090713	immunological memory process	8	2	0.2	0.01619
Resting B cells	GO:0006596	polyamine biosynthetic process	8	2	0.2	0.01619
Resting B cells	GO:0071635	negative regulation of transforming growth factor beta production	8	2	0.2	0.01619
Resting B cells	GO:1900044	regulation of protein K63-linked ubiquitination	8	2	0.2	0.01619
Resting B cells	GO:1902946	protein localization to early endosome	8	2	0.2	0.01619
Resting B cells	GO:0140289	protein mono-ADP-ribosylation	8	2	0.2	0.01619
Resting B cells	GO:0006000	fructose metabolic process	8	2	0.2	0.01619
Resting B cells	GO:1903909	regulation of receptor clustering	8	2	0.2	0.01619
Resting B cells	GO:0072593	reactive oxygen species metabolic process	154	9	3.9	0.01643
Resting B cells	GO:0043065	positive regulation of apoptotic process	332	19	8.41	0.01647
Resting B cells	GO:0010558	negative regulation of macromolecule biosynthetic process	827	40	20.95	0.0169
Resting B cells	GO:0045934	negative regulation of nucleobase-containing compound metabolic process	844	38	21.38	0.01696
Resting B cells	GO:0007249	I-kappaB kinase/NF-kappaB signaling	155	9	3.93	0.01707
Resting B cells	GO:0045066	regulatory T cell differentiation	22	3	0.56	0.01734
Resting B cells	GO:0031327	negative regulation of cellular biosynthetic process	859	41	21.76	0.01746
Resting B cells	GO:0030216	keratinocyte differentiation	60	5	1.52	0.01768
Resting B cells	GO:1904894	positive regulation of receptor signaling pathway via STAT	40	4	1.01	0.01801
Resting B cells	GO:0002064	epithelial cell development	131	8	3.32	0.0182
Resting B cells	GO:0002520	immune system development	613	44	15.53	0.0183
Resting B cells	GO:0045861	negative regulation of proteolysis	144	12	3.65	0.01833
Resting B cells	GO:0002250	adaptive immune response	185	19	4.69	0.01839
Resting B cells	GO:0002244	hematopoietic progenitor cell differentiation	83	6	2.1	0.01858
Resting B cells	GO:0019221	cytokine-mediated signaling pathway	198	17	5.02	0.01873
Resting B cells	GO:0071496	cellular response to external stimulus	168	13	4.26	0.01894
Resting B cells	GO:0043068	positive regulation of programmed cell death	338	19	8.56	0.01925
Resting B cells	GO:0070848	response to growth factor	357	16	9.04	0.01951
Resting B cells	GO:0001885	endothelial cell development	41	4	1.04	0.01957
Resting B cells	GO:0042093	T-helper cell differentiation	41	4	1.04	0.01957
Resting B cells	GO:0050853	B cell receptor signaling pathway	41	4	1.04	0.01957
Resting B cells	GO:0060761	negative regulation of response to cytokine stimulus	41	4	1.04	0.01957
Resting B cells	GO:0071364	cellular response to epidermal growth factor stimulus	23	3	0.58	0.01958
Resting B cells	GO:0043029	T cell homeostasis	23	3	0.58	0.01958
Resting B cells	GO:0071229	cellular response to acid chemical	84	6	2.13	0.0196
Resting B cells	GO:0043122	regulation of I-kappaB kinase/NF-kappaB signaling	133	8	3.37	0.01976
Resting B cells	GO:0030278	regulation of ossification	133	8	3.37	0.01976
Resting B cells	GO:0030155	regulation of cell adhesion	439	26	11.12	0.01983
Resting B cells	GO:0050871	positive regulation of B cell activation	62	5	1.57	0.02012
Resting B cells	GO:0042832	defense response to protozoan	9	2	0.23	0.02047
Resting B cells	GO:0043129	surfactant homeostasis	9	2	0.23	0.02047
Resting B cells	GO:0045822	negative regulation of heart contraction	9	2	0.23	0.02047
Resting B cells	GO:0035455	response to interferon-alpha	9	2	0.23	0.02047
Resting B cells	GO:0002863	positive regulation of inflammatory response to antigenic stimulus	9	2	0.23	0.02047
Resting B cells	GO:0042401	cellular biogenic amine biosynthetic process	9	2	0.23	0.02047
Resting B cells	GO:0009309	amine biosynthetic process	9	2	0.23	0.02047
Resting B cells	GO:0050776	regulation of immune response	406	30	10.29	0.02048
Resting B cells	GO:0008285	negative regulation of cell population proliferation	390	17	9.88	0.02083
Resting B cells	GO:0002294	CD4-positive, alpha-beta T cell differentiation involved in immune response	42	4	1.06	0.02121
Resting B cells	GO:0061180	mammary gland epithelium development	42	4	1.06	0.02121
Resting B cells	GO:0050854	regulation of antigen receptor-mediated signaling pathway	42	4	1.06	0.02121
Resting B cells	GO:0045600	positive regulation of fat cell differentiation	42	4	1.06	0.02121
Resting B cells	GO:0071156	regulation of cell cycle arrest	42	4	1.06	0.02121
Resting B cells	GO:1905477	positive regulation of protein localization to membrane	63	5	1.6	0.02142
Resting B cells	GO:0060537	muscle tissue development	179	12	4.53	0.02164
Resting B cells	GO:0034097	response to cytokine	466	41	11.81	0.02174
Resting B cells	GO:0007050	cell cycle arrest	86	6	2.18	0.02175
Resting B cells	GO:0042592	homeostatic process	977	41	24.75	0.02195
Resting B cells	GO:0021955	central nervous system neuron axonogenesis	24	3	0.61	0.02197
Resting B cells	GO:0060338	regulation of type I interferon-mediated signaling pathway	24	3	0.61	0.02197
Resting B cells	GO:0048583	regulation of response to stimulus	2245	101	56.88	0.02222
Resting B cells	GO:0031668	cellular response to extracellular stimulus	136	8	3.45	0.02226
Resting B cells	GO:0046634	regulation of alpha-beta T cell activation	64	5	1.62	0.02277
Resting B cells	GO:0002293	alpha-beta T cell differentiation involved in immune response	43	4	1.09	0.02293
Resting B cells	GO:0002287	alpha-beta T cell activation involved in immune response	43	4	1.09	0.02293
Resting B cells	GO:0010647	positive regulation of cell communication	950	40	24.07	0.02312
Resting B cells	GO:1903320	regulation of protein modification by small protein conjugation or removal	166	13	4.21	0.02362
Resting B cells	GO:0035710	CD4-positive, alpha-beta T cell activation	65	5	1.65	0.02417
Resting B cells	GO:0023056	positive regulation of signaling	954	40	24.17	0.02443
Resting B cells	GO:0002369	T cell cytokine production	25	3	0.63	0.0245
Resting B cells	GO:0048146	positive regulation of fibroblast proliferation	25	3	0.63	0.0245
Resting B cells	GO:0002724	regulation of T cell cytokine production	25	3	0.63	0.0245
Resting B cells	GO:0032735	positive regulation of interleukin-12 production	25	3	0.63	0.0245
Resting B cells	GO:0070849	response to epidermal growth factor	25	3	0.63	0.0245
Resting B cells	GO:1903039	positive regulation of leukocyte cell-cell adhesion	131	10	3.32	0.02454
Resting B cells	GO:0001562	response to protozoan	10	2	0.25	0.02516
Resting B cells	GO:1903799	negative regulation of production of miRNAs involved in gene silencing by miRNA	10	2	0.25	0.02516
Resting B cells	GO:1902043	positive regulation of extrinsic apoptotic signaling pathway via death domain receptors	10	2	0.25	0.02516
Resting B cells	GO:1905668	positive regulation of protein localization to endosome	10	2	0.25	0.02516
Resting B cells	GO:1902916	positive regulation of protein polyubiquitination	10	2	0.25	0.02516
Resting B cells	GO:0045591	positive regulation of regulatory T cell differentiation	10	2	0.25	0.02516
Resting B cells	GO:1902931	negative regulation of alcohol biosynthetic process	10	2	0.25	0.02516
Resting B cells	GO:0048670	regulation of collateral sprouting	10	2	0.25	0.02516
Resting B cells	GO:0060330	regulation of response to interferon-gamma	10	2	0.25	0.02516
Resting B cells	GO:0060334	regulation of interferon-gamma-mediated signaling pathway	10	2	0.25	0.02516
Resting B cells	GO:0036490	regulation of translation in response to endoplasmic reticulum stress	10	2	0.25	0.02516
Resting B cells	GO:0034116	positive regulation of heterotypic cell-cell adhesion	10	2	0.25	0.02516
Resting B cells	GO:0006606	protein import into nucleus	89	6	2.25	0.02527
Resting B cells	GO:0032680	regulation of tumor necrosis factor production	89	6	2.25	0.02527
Resting B cells	GO:0032640	tumor necrosis factor production	89	6	2.25	0.02527
Resting B cells	GO:0010605	negative regulation of macromolecule metabolic process	1563	74	39.6	0.02536
Resting B cells	GO:0002253	activation of immune response	161	12	4.08	0.02599
Resting B cells	GO:0010941	regulation of cell death	896	42	22.7	0.02624
Resting B cells	GO:0098586	cellular response to virus	45	4	1.14	0.02662
Resting B cells	GO:1903901	negative regulation of viral life cycle	45	4	1.14	0.02662
Resting B cells	GO:0071310	cellular response to organic substance	1229	67	31.14	0.02684
Resting B cells	GO:0070371	ERK1 and ERK2 cascade	168	9	4.26	0.02713
Resting B cells	GO:0010959	regulation of metal ion transport	168	9	4.26	0.02713
Resting B cells	GO:0043330	response to exogenous dsRNA	26	3	0.66	0.02719
Resting B cells	GO:0002218	activation of innate immune response	26	3	0.66	0.02719
Resting B cells	GO:0030890	positive regulation of B cell proliferation	26	3	0.66	0.02719
Resting B cells	GO:0060323	head morphogenesis	26	3	0.66	0.02719
Resting B cells	GO:0042149	cellular response to glucose starvation	26	3	0.66	0.02719
Resting B cells	GO:0043269	regulation of ion transport	253	12	6.41	0.02757
Resting B cells	GO:0043067	regulation of programmed cell death	831	40	21.05	0.0278
Resting B cells	GO:0045766	positive regulation of angiogenesis	91	6	2.31	0.02781
Resting B cells	GO:0009719	response to endogenous stimulus	717	30	18.16	0.02831
Resting B cells	GO:0002292	T cell differentiation involved in immune response	46	4	1.17	0.0286
Resting B cells	GO:0050672	negative regulation of lymphocyte proliferation	46	4	1.17	0.0286
Resting B cells	GO:0031325	positive regulation of cellular metabolic process	1912	79	48.44	0.02907
Resting B cells	GO:2001242	regulation of intrinsic apoptotic signaling pathway	117	7	2.96	0.02907
Resting B cells	GO:1903900	regulation of viral life cycle	92	6	2.33	0.02915
Resting B cells	GO:0051170	import into nucleus	92	6	2.33	0.02915
Resting B cells	GO:0002696	positive regulation of leukocyte activation	189	12	4.79	0.02934
Resting B cells	GO:0051241	negative regulation of multicellular organismal process	654	35	16.57	0.02955
Resting B cells	GO:0006417	regulation of translation	185	13	4.69	0.0296
Resting B cells	GO:0032269	negative regulation of cellular protein metabolic process	570	36	14.44	0.02987
Resting B cells	GO:1904036	negative regulation of epithelial cell apoptotic process	27	3	0.68	0.03004
Resting B cells	GO:0035019	somatic stem cell population maintenance	27	3	0.68	0.03004
Resting B cells	GO:1903202	negative regulation of oxidative stress-induced cell death	27	3	0.68	0.03004
Resting B cells	GO:0042531	positive regulation of tyrosine phosphorylation of STAT protein	27	3	0.68	0.03004
Resting B cells	GO:0050856	regulation of T cell receptor signaling pathway	27	3	0.68	0.03004
Resting B cells	GO:1900408	negative regulation of cellular response to oxidative stress	27	3	0.68	0.03004
Resting B cells	GO:2000113	negative regulation of cellular macromolecule biosynthetic process	820	39	20.77	0.03014
Resting B cells	GO:0002467	germinal center formation	11	2	0.28	0.03025
Resting B cells	GO:0070431	nucleotide-binding oligomerization domain containing 2 signaling pathway	11	2	0.28	0.03025
Resting B cells	GO:1905666	regulation of protein localization to endosome	11	2	0.28	0.03025
Resting B cells	GO:0048875	chemical homeostasis within a tissue	11	2	0.28	0.03025
Resting B cells	GO:1900151	regulation of nuclear-transcribed mRNA catabolic process, deadenylation-dependent decay	11	2	0.28	0.03025
Resting B cells	GO:1900153	positive regulation of nuclear-transcribed mRNA catabolic process, deadenylation-dependent decay	11	2	0.28	0.03025
Resting B cells	GO:0001101	response to acid chemical	118	7	2.99	0.03026
Resting B cells	GO:0002237	response to molecule of bacterial origin	145	13	3.67	0.03034
Resting B cells	GO:0006413	translational initiation	69	5	1.75	0.03035
Resting B cells	GO:0071706	tumor necrosis factor superfamily cytokine production	93	6	2.36	0.03052
Resting B cells	GO:1903555	regulation of tumor necrosis factor superfamily cytokine production	93	6	2.36	0.03052
Resting B cells	GO:1904029	regulation of cyclin-dependent protein kinase activity	47	4	1.19	0.03066
Resting B cells	GO:0008585	female gonad development	47	4	1.19	0.03066
Resting B cells	GO:0032945	negative regulation of mononuclear cell proliferation	47	4	1.19	0.03066
Resting B cells	GO:0002429	immune response-activating cell surface receptor signaling pathway	118	10	2.99	0.0312
Resting B cells	GO:0002757	immune response-activating signal transduction	118	10	2.99	0.0312
Resting B cells	GO:0051173	positive regulation of nitrogen compound metabolic process	1805	76	45.73	0.0313
Resting B cells	GO:0071363	cellular response to growth factor stimulus	348	15	8.82	0.03151
Resting B cells	GO:0051253	negative regulation of RNA metabolic process	778	35	19.71	0.03169
Resting B cells	GO:0045786	negative regulation of cell cycle	288	13	7.3	0.03175
Resting B cells	GO:0000956	nuclear-transcribed mRNA catabolic process	70	5	1.77	0.03203
Resting B cells	GO:0051247	positive regulation of protein metabolic process	933	40	23.64	0.03264
Resting B cells	GO:0002444	myeloid leukocyte mediated immunity	48	4	1.22	0.0328
Resting B cells	GO:0002181	cytoplasmic translation	48	4	1.22	0.0328
Resting B cells	GO:0002709	regulation of T cell mediated immunity	48	4	1.22	0.0328
Resting B cells	GO:0070664	negative regulation of leukocyte proliferation	48	4	1.22	0.0328
Resting B cells	GO:0045765	regulation of angiogenesis	174	9	4.41	0.03296
Resting B cells	GO:0010557	positive regulation of macromolecule biosynthetic process	1054	47	26.7	0.033
Resting B cells	GO:0051591	response to cAMP	28	3	0.71	0.03303
Resting B cells	GO:0031507	heterochromatin assembly	28	3	0.71	0.03303
Resting B cells	GO:0097028	dendritic cell differentiation	28	3	0.71	0.03303
Resting B cells	GO:1902883	negative regulation of response to oxidative stress	28	3	0.71	0.03303
Resting B cells	GO:0048872	homeostasis of number of cells	196	16	4.97	0.03355
Resting B cells	GO:0051338	regulation of transferase activity	508	20	12.87	0.03362
Resting B cells	GO:0032649	regulation of interferon-gamma production	71	5	1.8	0.03377
Resting B cells	GO:0010942	positive regulation of cell death	362	19	9.17	0.03403
Resting B cells	GO:0009893	positive regulation of metabolic process	2190	90	55.48	0.0343
Resting B cells	GO:0045935	positive regulation of nucleobase-containing compound metabolic process	1103	51	27.94	0.03446
Resting B cells	GO:0001818	negative regulation of cytokine production	153	16	3.88	0.03468
Resting B cells	GO:0009267	cellular response to starvation	96	6	2.43	0.0349
Resting B cells	GO:0002705	positive regulation of leukocyte mediated immunity	96	6	2.43	0.0349
Resting B cells	GO:0045665	negative regulation of neuron differentiation	96	6	2.43	0.0349
Resting B cells	GO:0042981	regulation of apoptotic process	812	39	20.57	0.0349
Resting B cells	GO:0072358	cardiovascular system development	415	17	10.51	0.03498
Resting B cells	GO:0001944	vasculature development	415	17	10.51	0.03498
Resting B cells	GO:0060021	roof of mouth development	49	4	1.24	0.03503
Resting B cells	GO:0046545	development of primary female sexual characteristics	49	4	1.24	0.03503
Resting B cells	GO:0001666	response to hypoxia	122	7	3.09	0.03536
Resting B cells	GO:0032609	interferon-gamma production	72	5	1.82	0.03557
Resting B cells	GO:0050862	positive regulation of T cell receptor signaling pathway	12	2	0.3	0.0357
Resting B cells	GO:0060965	negative regulation of gene silencing by miRNA	12	2	0.3	0.0357
Resting B cells	GO:0030889	negative regulation of B cell proliferation	12	2	0.3	0.0357
Resting B cells	GO:0023035	CD40 signaling pathway	12	2	0.3	0.0357
Resting B cells	GO:0072574	hepatocyte proliferation	12	2	0.3	0.0357
Resting B cells	GO:0072575	epithelial cell proliferation involved in liver morphogenesis	12	2	0.3	0.0357
Resting B cells	GO:1900121	negative regulation of receptor binding	12	2	0.3	0.0357
Resting B cells	GO:2000628	regulation of miRNA metabolic process	12	2	0.3	0.0357
Resting B cells	GO:0032967	positive regulation of collagen biosynthetic process	12	2	0.3	0.0357
Resting B cells	GO:0048385	regulation of retinoic acid receptor signaling pathway	12	2	0.3	0.0357
Resting B cells	GO:0006687	glycosphingolipid metabolic process	29	3	0.73	0.03617
Resting B cells	GO:0045071	negative regulation of viral genome replication	29	3	0.73	0.03617
Resting B cells	GO:0051438	regulation of ubiquitin-protein transferase activity	29	3	0.73	0.03617
Resting B cells	GO:1902229	regulation of intrinsic apoptotic signaling pathway in response to DNA damage	29	3	0.73	0.03617
Resting B cells	GO:0050790	regulation of catalytic activity	1054	42	26.7	0.0362
Resting B cells	GO:0010604	positive regulation of macromolecule metabolic process	2039	86	51.66	0.03634
Resting B cells	GO:0046677	response to antibiotic	97	6	2.46	0.03644
Resting B cells	GO:0050867	positive regulation of cell activation	196	12	4.97	0.03652
Resting B cells	GO:0036293	response to decreased oxygen levels	123	7	3.12	0.03672
Resting B cells	GO:0046632	alpha-beta T cell differentiation	73	5	1.85	0.03743
Resting B cells	GO:1901700	response to oxygen-containing compound	701	32	17.76	0.03825
Resting B cells	GO:0007259	receptor signaling pathway via JAK-STAT	74	5	1.87	0.03934
Resting B cells	GO:0071559	response to transforming growth factor beta	152	8	3.85	0.03945
Resting B cells	GO:0006826	iron ion transport	30	3	0.76	0.03946
Resting B cells	GO:0000288	nuclear-transcribed mRNA catabolic process, deadenylation-dependent decay	30	3	0.76	0.03946
Resting B cells	GO:0035335	peptidyl-tyrosine dephosphorylation	30	3	0.76	0.03946
Resting B cells	GO:0008631	intrinsic apoptotic signaling pathway in response to oxidative stress	30	3	0.76	0.03946
Resting B cells	GO:1904018	positive regulation of vasculature development	99	6	2.51	0.03966
Resting B cells	GO:0042742	defense response to bacterium	99	6	2.51	0.03966
Resting B cells	GO:0010608	posttranscriptional regulation of gene expression	270	17	6.84	0.04012
Resting B cells	GO:0034248	regulation of cellular amide metabolic process	224	14	5.67	0.0402
Resting B cells	GO:0009966	regulation of signal transduction	1678	72	42.51	0.04023
Resting B cells	GO:1902667	regulation of axon guidance	13	2	0.33	0.0415
Resting B cells	GO:0002407	dendritic cell chemotaxis	13	2	0.33	0.0415
Resting B cells	GO:0010714	positive regulation of collagen metabolic process	13	2	0.33	0.0415
Resting B cells	GO:0070168	negative regulation of biomineral tissue development	13	2	0.33	0.0415
Resting B cells	GO:0043555	regulation of translation in response to stress	13	2	0.33	0.0415
Resting B cells	GO:0110150	negative regulation of biomineralization	13	2	0.33	0.0415
Resting B cells	GO:0031954	positive regulation of protein autophosphorylation	13	2	0.33	0.0415
Resting B cells	GO:0046716	muscle cell cellular homeostasis	13	2	0.33	0.0415
Resting B cells	GO:0072576	liver morphogenesis	13	2	0.33	0.0415
Resting B cells	GO:0051444	negative regulation of ubiquitin-protein transferase activity	13	2	0.33	0.0415
Resting B cells	GO:1904666	regulation of ubiquitin protein ligase activity	13	2	0.33	0.0415
Resting B cells	GO:0002922	positive regulation of humoral immune response	13	2	0.33	0.0415
Resting B cells	GO:0001817	regulation of cytokine production	438	35	11.1	0.04213
Resting B cells	GO:0023051	regulation of signaling	1876	77	47.53	0.04223
Resting B cells	GO:0033209	tumor necrosis factor-mediated signaling pathway	52	4	1.32	0.04223
Resting B cells	GO:0071407	cellular response to organic cyclic compound	259	15	6.56	0.04275
Resting B cells	GO:0001568	blood vessel development	394	16	9.98	0.04278
Resting B cells	GO:0043124	negative regulation of I-kappaB kinase/NF-kappaB signaling	31	3	0.79	0.04289
Resting B cells	GO:0002886	regulation of myeloid leukocyte mediated immunity	31	3	0.79	0.04289
Resting B cells	GO:0022612	gland morphogenesis	76	5	1.93	0.04335
Resting B cells	GO:0097696	receptor signaling pathway via STAT	76	5	1.93	0.04335
Resting B cells	GO:0008360	regulation of cell shape	76	5	1.93	0.04335
Resting B cells	GO:0002702	positive regulation of production of molecular mediator of immune response	76	5	1.93	0.04335
Resting B cells	GO:0050671	positive regulation of lymphocyte proliferation	76	5	1.93	0.04335
Resting B cells	GO:0002286	T cell activation involved in immune response	59	6	1.49	0.04388
Resting B cells	GO:0043410	positive regulation of MAPK cascade	272	12	6.89	0.04417
Resting B cells	GO:0010629	negative regulation of gene expression	1135	53	28.75	0.04442
Resting B cells	GO:0002262	myeloid cell homeostasis	110	9	2.79	0.0447
Resting B cells	GO:0043367	CD4-positive, alpha-beta T cell differentiation	53	4	1.34	0.04481
Resting B cells	GO:0019080	viral gene expression	53	4	1.34	0.04481
Resting B cells	GO:0031349	positive regulation of defense response	148	11	3.75	0.04499
Resting B cells	GO:0002708	positive regulation of lymphocyte mediated immunity	77	5	1.95	0.04544
Resting B cells	GO:1990830	cellular response to leukemia inhibitory factor	77	5	1.95	0.04544
Resting B cells	GO:0032946	positive regulation of mononuclear cell proliferation	77	5	1.95	0.04544
Resting B cells	GO:0010332	response to gamma radiation	32	3	0.81	0.04647
Resting B cells	GO:0032720	negative regulation of tumor necrosis factor production	32	3	0.81	0.04647
Resting B cells	GO:0001961	positive regulation of cytokine-mediated signaling pathway	32	3	0.81	0.04647
Resting B cells	GO:0002686	negative regulation of leukocyte migration	32	3	0.81	0.04647
Resting B cells	GO:2000736	regulation of stem cell differentiation	32	3	0.81	0.04647
Resting B cells	GO:0046847	filopodium assembly	32	3	0.81	0.04647
Resting B cells	GO:1902041	regulation of extrinsic apoptotic signaling pathway via death domain receptors	33	6	0.84	0.04651
Resting B cells	GO:0000082	G1/S transition of mitotic cell cycle	103	6	2.61	0.04662
Resting B cells	GO:0051093	negative regulation of developmental process	541	23	13.71	0.0474
Resting B cells	GO:0042542	response to hydrogen peroxide	54	4	1.37	0.04747
Resting B cells	GO:1990823	response to leukemia inhibitory factor	78	5	1.98	0.04759
Resting B cells	GO:0043304	regulation of mast cell degranulation	14	2	0.35	0.04762
Resting B cells	GO:1901385	regulation of voltage-gated calcium channel activity	14	2	0.35	0.04762
Resting B cells	GO:0048710	regulation of astrocyte differentiation	14	2	0.35	0.04762
Resting B cells	GO:0030212	hyaluronan metabolic process	14	2	0.35	0.04762
Resting B cells	GO:0060967	negative regulation of gene silencing by RNA	14	2	0.35	0.04762
Resting B cells	GO:0060969	negative regulation of gene silencing	14	2	0.35	0.04762
Resting B cells	GO:2000737	negative regulation of stem cell differentiation	14	2	0.35	0.04762
Resting B cells	GO:0060149	negative regulation of posttranscriptional gene silencing	14	2	0.35	0.04762
Resting B cells	GO:0032965	regulation of collagen biosynthetic process	14	2	0.35	0.04762
Resting B cells	GO:0001525	angiogenesis	276	12	6.99	0.0484
Resting B cells	GO:0002706	regulation of lymphocyte mediated immunity	104	6	2.63	0.04847
Resting B cells	GO:0007178	transmembrane receptor protein serine/threonine kinase signaling pathway	217	10	5.5	0.04951
Resting B cells	GO:0002483	antigen processing and presentation of endogenous peptide antigen	10	4	0.25	0.04952
Resting B cells	GO:0034614	cellular response to reactive oxygen species	79	5	2	0.0498
Cycling B cells	GO:0071459	protein localization to chromosome, centromeric region	18	11	0.61	0.00014
Cycling B cells	GO:0045841	negative regulation of mitotic metaphase/anaphase transition	30	8	1.02	0.00025
Cycling B cells	GO:0009124	nucleoside monophosphate biosynthetic process	18	5	0.61	0.00026
Cycling B cells	GO:0034728	nucleosome organization	67	12	2.27	0.00031
Cycling B cells	GO:0070192	chromosome organization involved in meiotic cell cycle	40	7	1.36	0.00035
Cycling B cells	GO:0010457	centriole-centriole cohesion	11	4	0.37	0.00036
Cycling B cells	GO:0031145	anaphase-promoting complex-dependent catabolic process	11	4	0.37	0.00036
Cycling B cells	GO:0000395	mRNA 5'-splice site recognition	5	3	0.17	0.00037
Cycling B cells	GO:0010216	maintenance of DNA methylation	5	3	0.17	0.00037
Cycling B cells	GO:0009265	2'-deoxyribonucleotide biosynthetic process	5	3	0.17	0.00037
Cycling B cells	GO:0051255	spindle midzone assembly	5	3	0.17	0.00037
Cycling B cells	GO:0090666	scaRNA localization to Cajal body	5	3	0.17	0.00037
Cycling B cells	GO:1901998	toxin transport	30	6	1.02	0.00044
Cycling B cells	GO:0010971	positive regulation of G2/M transition of mitotic cell cycle	20	5	0.68	0.00045
Cycling B cells	GO:0032467	positive regulation of cytokinesis	20	5	0.68	0.00045
Cycling B cells	GO:0006336	DNA replication-independent nucleosome assembly	12	4	0.41	0.00052
Cycling B cells	GO:0032506	cytokinetic process	31	6	1.05	0.00053
Cycling B cells	GO:0007064	mitotic sister chromatid cohesion	21	5	0.71	0.00057
Cycling B cells	GO:0007018	microtubule-based movement	171	15	5.8	0.00071
Cycling B cells	GO:0007127	meiosis I	58	8	1.97	0.00071
Cycling B cells	GO:0006269	DNA replication, synthesis of RNA primer	6	3	0.2	0.00072
Cycling B cells	GO:1904666	regulation of ubiquitin protein ligase activity	13	4	0.44	0.00073
Cycling B cells	GO:0000398	mRNA splicing, via spliceosome	189	27	6.41	0.00079
Cycling B cells	GO:0007052	mitotic spindle organization	84	20	2.85	0.00086
Cycling B cells	GO:0040001	establishment of mitotic spindle localization	23	5	0.78	0.00089
Cycling B cells	GO:0042775	mitochondrial ATP synthesis coupled electron transport	35	6	1.19	0.00103
Cycling B cells	GO:0051988	regulation of attachment of spindle microtubules to kinetochore	13	7	0.44	0.00119
Cycling B cells	GO:0035404	histone-serine phosphorylation	7	3	0.24	0.00123
Cycling B cells	GO:0042744	hydrogen peroxide catabolic process	7	3	0.24	0.00123
Cycling B cells	GO:0000212	meiotic spindle organization	7	3	0.24	0.00123
Cycling B cells	GO:1904872	regulation of telomerase RNA localization to Cajal body	7	3	0.24	0.00123
Cycling B cells	GO:0019430	removal of superoxide radicals	15	4	0.51	0.00132
Cycling B cells	GO:0007019	microtubule depolymerization	25	5	0.85	0.00133
Cycling B cells	GO:0065004	protein-DNA complex assembly	79	17	2.68	0.00135
Cycling B cells	GO:0045132	meiotic chromosome segregation	50	7	1.7	0.00139
Cycling B cells	GO:0045190	isotype switching	37	6	1.26	0.0014
Cycling B cells	GO:0090329	regulation of DNA-dependent DNA replication	33	10	1.12	0.00151
Cycling B cells	GO:0031497	chromatin assembly	81	12	2.75	0.00158
Cycling B cells	GO:0061077	chaperone-mediated protein folding	28	7	0.95	0.00167
Cycling B cells	GO:0008608	attachment of spindle microtubules to kinetochore	25	13	0.85	0.00177
Cycling B cells	GO:2001251	negative regulation of chromosome organization	98	16	3.33	0.0018
Cycling B cells	GO:0006335	DNA replication-dependent nucleosome assembly	8	3	0.27	0.00191
Cycling B cells	GO:0046602	regulation of mitotic centrosome separation	8	3	0.27	0.00191
Cycling B cells	GO:0009219	pyrimidine deoxyribonucleotide metabolic process	8	3	0.27	0.00191
Cycling B cells	GO:0042026	protein refolding	8	3	0.27	0.00191
Cycling B cells	GO:0016446	somatic hypermutation of immunoglobulin genes	8	3	0.27	0.00191
Cycling B cells	GO:0022900	electron transport chain	63	11	2.14	0.00213
Cycling B cells	GO:0007049	cell cycle	918	105	31.15	0.00261
Cycling B cells	GO:0007143	female meiotic nuclear division	18	4	0.61	0.00274
Cycling B cells	GO:0036297	interstrand cross-link repair	18	4	0.61	0.00274
Cycling B cells	GO:0006266	DNA ligation	9	3	0.31	0.0028
Cycling B cells	GO:0000724	double-strand break repair via homologous recombination	88	9	2.99	0.00291
Cycling B cells	GO:0044839	cell cycle G2/M phase transition	93	13	3.16	0.00297
Cycling B cells	GO:0006281	DNA repair	321	30	10.89	0.00299
Cycling B cells	GO:0007004	telomere maintenance via telomerase	46	12	1.56	0.00314
Cycling B cells	GO:1903047	mitotic cell cycle process	424	69	14.39	0.00327
Cycling B cells	GO:0051702	interaction with symbiont	58	7	1.97	0.00332
Cycling B cells	GO:0009263	deoxyribonucleotide biosynthetic process	8	5	0.27	0.00332
Cycling B cells	GO:0043462	regulation of ATPase activity	31	5	1.05	0.00359
Cycling B cells	GO:0007091	metaphase/anaphase transition of mitotic cell cycle	40	11	1.36	0.00368
Cycling B cells	GO:0051052	regulation of DNA metabolic process	235	30	7.97	0.00387
Cycling B cells	GO:0032508	DNA duplex unwinding	26	8	0.88	0.00395
Cycling B cells	GO:0034644	cellular response to UV	60	7	2.04	0.00402
Cycling B cells	GO:0006298	mismatch repair	20	4	0.68	0.00411
Cycling B cells	GO:0045840	positive regulation of mitotic nuclear division	32	5	1.09	0.00414
Cycling B cells	GO:0051301	cell division	182	22	6.18	0.0044
Cycling B cells	GO:0000381	regulation of alternative mRNA splicing, via spliceosome	33	5	1.12	0.00475
Cycling B cells	GO:0098761	cellular response to interleukin-7	11	3	0.37	0.00522
Cycling B cells	GO:0000413	protein peptidyl-prolyl isomerization	22	4	0.75	0.00588
Cycling B cells	GO:0070828	heterochromatin organization	35	5	1.19	0.00615
Cycling B cells	GO:0006306	DNA methylation	35	5	1.19	0.00615
Cycling B cells	GO:1901990	regulation of mitotic cell cycle phase transition	168	21	5.7	0.00635
Cycling B cells	GO:0050821	protein stabilization	117	10	3.97	0.00637
Cycling B cells	GO:0044786	cell cycle DNA replication	19	8	0.64	0.00639
Cycling B cells	GO:0051085	chaperone cofactor-dependent protein refolding	12	3	0.41	0.00679
Cycling B cells	GO:0090266	regulation of mitotic cell cycle spindle assembly checkpoint	12	3	0.41	0.00679
Cycling B cells	GO:0015986	ATP synthesis coupled proton transport	23	4	0.78	0.00693
Cycling B cells	GO:0070979	protein K11-linked ubiquitination	23	4	0.78	0.00693
Cycling B cells	GO:0051225	spindle assembly	75	18	2.55	0.00717
Cycling B cells	GO:0017038	protein import	120	10	4.07	0.00759
Cycling B cells	GO:0048524	positive regulation of viral process	68	7	2.31	0.00802
Cycling B cells	GO:0090068	positive regulation of cell cycle process	158	22	5.36	0.00818
Cycling B cells	GO:0009162	deoxyribonucleoside monophosphate metabolic process	13	3	0.44	0.0086
Cycling B cells	GO:1904355	positive regulation of telomere capping	13	3	0.44	0.0086
Cycling B cells	GO:0006606	protein import into nucleus	89	8	3.02	0.01053
Cycling B cells	GO:0043923	positive regulation by host of viral transcription	14	3	0.48	0.01068
Cycling B cells	GO:0051131	chaperone-mediated protein complex assembly	14	3	0.48	0.01068
Cycling B cells	GO:0032069	regulation of nuclease activity	14	3	0.48	0.01068
Cycling B cells	GO:0010994	free ubiquitin chain polymerization	5	2	0.17	0.01073
Cycling B cells	GO:1905462	regulation of DNA duplex unwinding	5	2	0.17	0.01073
Cycling B cells	GO:1901538	changes to DNA methylation involved in embryo development	5	2	0.17	0.01073
Cycling B cells	GO:1905448	positive regulation of mitochondrial ATP synthesis coupled electron transport	5	2	0.17	0.01073
Cycling B cells	GO:0043045	DNA methylation involved in embryo development	5	2	0.17	0.01073
Cycling B cells	GO:0015866	ADP transport	5	2	0.17	0.01073
Cycling B cells	GO:0032075	positive regulation of nuclease activity	5	2	0.17	0.01073
Cycling B cells	GO:0030952	establishment or maintenance of cytoskeleton polarity	5	2	0.17	0.01073
Cycling B cells	GO:1905323	telomerase holoenzyme complex assembly	5	2	0.17	0.01073
Cycling B cells	GO:0000086	G2/M transition of mitotic cell cycle	76	11	2.58	0.01078
Cycling B cells	GO:0009408	response to heat	40	5	1.36	0.01085
Cycling B cells	GO:0032465	regulation of cytokinesis	61	10	2.07	0.01146
Cycling B cells	GO:0006338	chromatin remodeling	91	8	3.09	0.01196
Cycling B cells	GO:0034502	protein localization to chromosome	70	22	2.38	0.0122
Cycling B cells	GO:0045005	DNA-dependent DNA replication maintenance of fidelity	27	4	0.92	0.01234
Cycling B cells	GO:0042752	regulation of circadian rhythm	57	6	1.93	0.01238
Cycling B cells	GO:0031110	regulation of microtubule polymerization or depolymerization	57	6	1.93	0.01238
Cycling B cells	GO:0000018	regulation of DNA recombination	74	7	2.51	0.01253
Cycling B cells	GO:0051236	establishment of RNA localization	74	7	2.51	0.01253
Cycling B cells	GO:0051170	import into nucleus	92	8	3.12	0.01273
Cycling B cells	GO:0006346	DNA methylation-dependent heterochromatin assembly	15	3	0.51	0.01302
Cycling B cells	GO:0051443	positive regulation of ubiquitin-protein transferase activity	15	3	0.51	0.01302
Cycling B cells	GO:0034655	nucleobase-containing compound catabolic process	234	15	7.94	0.01364
Cycling B cells	GO:0007099	centriole replication	28	4	0.95	0.01402
Cycling B cells	GO:0045070	positive regulation of viral genome replication	28	4	0.95	0.01402
Cycling B cells	GO:0007017	microtubule-based process	523	54	17.75	0.01429
Cycling B cells	GO:0097549	chromatin organization involved in negative regulation of transcription	43	5	1.46	0.01462
Cycling B cells	GO:0007094	mitotic spindle assembly checkpoint	28	6	0.95	0.01533
Cycling B cells	GO:0071173	spindle assembly checkpoint	28	6	0.95	0.01533
Cycling B cells	GO:0071174	mitotic spindle checkpoint	28	6	0.95	0.01533
Cycling B cells	GO:1990830	cellular response to leukemia inhibitory factor	77	7	2.61	0.01537
Cycling B cells	GO:0051321	meiotic cell cycle	106	21	3.6	0.01554
Cycling B cells	GO:0006221	pyrimidine nucleotide biosynthetic process	16	3	0.54	0.01562
Cycling B cells	GO:1904668	positive regulation of ubiquitin protein ligase activity	6	2	0.2	0.01573
Cycling B cells	GO:0010992	ubiquitin recycling	6	2	0.2	0.01573
Cycling B cells	GO:1905446	regulation of mitochondrial ATP synthesis coupled electron transport	6	2	0.2	0.01573
Cycling B cells	GO:0010182	sugar mediated signaling pathway	6	2	0.2	0.01573
Cycling B cells	GO:0044359	modulation of molecular function in other organism	6	2	0.2	0.01573
Cycling B cells	GO:0052428	modulation by host of symbiont molecular function	6	2	0.2	0.01573
Cycling B cells	GO:0009176	pyrimidine deoxyribonucleoside monophosphate metabolic process	6	2	0.2	0.01573
Cycling B cells	GO:0010255	glucose mediated signaling pathway	6	2	0.2	0.01573
Cycling B cells	GO:0070601	centromeric sister chromatid cohesion	6	2	0.2	0.01573
Cycling B cells	GO:0009756	carbohydrate mediated signaling	6	2	0.2	0.01573
Cycling B cells	GO:0006287	base-excision repair, gap-filling	6	2	0.2	0.01573
Cycling B cells	GO:0009757	hexose mediated signaling	6	2	0.2	0.01573
Cycling B cells	GO:0052205	modulation of molecular function in other organism involved in symbiotic interaction	6	2	0.2	0.01573
Cycling B cells	GO:0090235	regulation of metaphase plate congression	6	2	0.2	0.01573
Cycling B cells	GO:0051791	medium-chain fatty acid metabolic process	6	2	0.2	0.01573
Cycling B cells	GO:1990823	response to leukemia inhibitory factor	78	7	2.65	0.01641
Cycling B cells	GO:0007098	centrosome cycle	98	13	3.33	0.01731
Cycling B cells	GO:0098534	centriole assembly	30	4	1.02	0.0178
Cycling B cells	GO:0006261	DNA-dependent DNA replication	90	28	3.05	0.01802
Cycling B cells	GO:0031577	spindle checkpoint	29	6	0.98	0.01815
Cycling B cells	GO:0006275	regulation of DNA replication	64	14	2.17	0.01834
Cycling B cells	GO:0050434	positive regulation of viral transcription	17	3	0.58	0.0185
Cycling B cells	GO:0010458	exit from mitosis	17	3	0.58	0.0185
Cycling B cells	GO:0040020	regulation of meiotic nuclear division	17	3	0.58	0.0185
Cycling B cells	GO:0007063	regulation of sister chromatid cohesion	17	3	0.58	0.0185
Cycling B cells	GO:0007051	spindle organization	127	27	4.31	0.01857
Cycling B cells	GO:0032981	mitochondrial respiratory chain complex I assembly	46	5	1.56	0.01918
Cycling B cells	GO:0010257	NADH dehydrogenase complex assembly	46	5	1.56	0.01918
Cycling B cells	GO:0007093	mitotic cell cycle checkpoint	76	9	2.58	0.02037
Cycling B cells	GO:0030261	chromosome condensation	19	10	0.64	0.02069
Cycling B cells	GO:0009266	response to temperature stimulus	64	6	2.17	0.02102
Cycling B cells	GO:1904667	negative regulation of ubiquitin protein ligase activity	7	2	0.24	0.02154
Cycling B cells	GO:1903862	positive regulation of oxidative phosphorylation	7	2	0.24	0.02154
Cycling B cells	GO:0009129	pyrimidine nucleoside monophosphate metabolic process	7	2	0.24	0.02154
Cycling B cells	GO:0007096	regulation of exit from mitosis	7	2	0.24	0.02154
Cycling B cells	GO:0085020	protein K6-linked ubiquitination	7	2	0.24	0.02154
Cycling B cells	GO:0090267	positive regulation of mitotic cell cycle spindle assembly checkpoint	7	2	0.24	0.02154
Cycling B cells	GO:0090232	positive regulation of spindle checkpoint	7	2	0.24	0.02154
Cycling B cells	GO:0070314	G1 to G0 transition	7	2	0.24	0.02154
Cycling B cells	GO:0044829	positive regulation by host of viral genome replication	7	2	0.24	0.02154
Cycling B cells	GO:0006403	RNA localization	91	10	3.09	0.02156
Cycling B cells	GO:0007131	reciprocal meiotic recombination	18	3	0.61	0.02166
Cycling B cells	GO:0031061	negative regulation of histone methylation	18	3	0.61	0.02166
Cycling B cells	GO:0043044	ATP-dependent chromatin remodeling	18	3	0.61	0.02166
Cycling B cells	GO:0008156	negative regulation of DNA replication	18	3	0.61	0.02166
Cycling B cells	GO:0051726	regulation of cell cycle	621	51	21.07	0.0217
Cycling B cells	GO:1904591	positive regulation of protein import	32	4	1.09	0.02216
Cycling B cells	GO:0051851	modulation by host of symbiont process	48	5	1.63	0.02269
Cycling B cells	GO:0034401	chromatin organization involved in regulation of transcription	48	5	1.63	0.02269
Cycling B cells	GO:1903902	positive regulation of viral life cycle	48	5	1.63	0.02269
Cycling B cells	GO:0051302	regulation of cell division	86	11	2.92	0.02287
Cycling B cells	GO:1902749	regulation of cell cycle G2/M phase transition	69	10	2.34	0.02349
Cycling B cells	GO:0010389	regulation of G2/M transition of mitotic cell cycle	53	9	1.8	0.02362
Cycling B cells	GO:0015931	nucleobase-containing compound transport	103	8	3.5	0.02366
Cycling B cells	GO:0071897	DNA biosynthetic process	109	23	3.7	0.02417
Cycling B cells	GO:0031023	microtubule organizing center organization	104	13	3.53	0.02475
Cycling B cells	GO:0006301	postreplication repair	19	3	0.64	0.02508
Cycling B cells	GO:0035825	homologous recombination	19	3	0.64	0.02508
Cycling B cells	GO:0006334	nucleosome assembly	49	8	1.66	0.02628
Cycling B cells	GO:0051303	establishment of chromosome localization	60	16	2.04	0.02645
Cycling B cells	GO:0045911	positive regulation of DNA recombination	34	4	1.15	0.02711
Cycling B cells	GO:0007144	female meiosis I	8	2	0.27	0.02808
Cycling B cells	GO:0033262	regulation of nuclear cell cycle DNA replication	8	2	0.27	0.02808
Cycling B cells	GO:0039692	single stranded viral RNA replication via double stranded DNA intermediate	8	2	0.27	0.02808
Cycling B cells	GO:0033539	fatty acid beta-oxidation using acyl-CoA dehydrogenase	8	2	0.27	0.02808
Cycling B cells	GO:0032780	negative regulation of ATPase activity	8	2	0.27	0.02808
Cycling B cells	GO:0034244	negative regulation of transcription elongation from RNA polymerase II promoter	8	2	0.27	0.02808
Cycling B cells	GO:0015867	ATP transport	8	2	0.27	0.02808
Cycling B cells	GO:0006544	glycine metabolic process	8	2	0.27	0.02808
Cycling B cells	GO:0006913	nucleocytoplasmic transport	190	12	6.45	0.0285
Cycling B cells	GO:0009303	rRNA transcription	20	3	0.68	0.02879
Cycling B cells	GO:0000132	establishment of mitotic spindle orientation	20	3	0.68	0.02879
Cycling B cells	GO:0045943	positive regulation of transcription by RNA polymerase I	20	3	0.68	0.02879
Cycling B cells	GO:0098813	nuclear chromosome segregation	182	45	6.18	0.02881
Cycling B cells	GO:0033108	mitochondrial respiratory chain complex assembly	69	6	2.34	0.02924
Cycling B cells	GO:0051169	nuclear transport	191	12	6.48	0.02952
Cycling B cells	GO:0044270	cellular nitrogen compound catabolic process	258	15	8.76	0.02985
Cycling B cells	GO:0050000	chromosome localization	61	16	2.07	0.03013
Cycling B cells	GO:0046700	heterocycle catabolic process	260	15	8.82	0.03166
Cycling B cells	GO:0006323	DNA packaging	102	22	3.46	0.03231
Cycling B cells	GO:0019439	aromatic compound catabolic process	261	15	8.86	0.0326
Cycling B cells	GO:0006289	nucleotide-excision repair	36	4	1.22	0.03267
Cycling B cells	GO:1902410	mitotic cytokinetic process	21	3	0.71	0.03276
Cycling B cells	GO:0032781	positive regulation of ATPase activity	21	3	0.71	0.03276
Cycling B cells	GO:0072528	pyrimidine-containing compound biosynthetic process	21	3	0.71	0.03276
Cycling B cells	GO:0019079	viral genome replication	71	6	2.41	0.03304
Cycling B cells	GO:0051298	centrosome duplication	53	5	1.8	0.03319
Cycling B cells	GO:0070203	regulation of establishment of protein localization to telomere	10	7	0.34	0.0334
Cycling B cells	GO:0051084	'de novo' posttranslational protein folding	13	4	0.44	0.03369
Cycling B cells	GO:0006458	'de novo' protein folding	13	4	0.44	0.03369
Cycling B cells	GO:0030071	regulation of mitotic metaphase/anaphase transition	39	10	1.32	0.03406
Cycling B cells	GO:0050657	nucleic acid transport	72	6	2.44	0.03505
Cycling B cells	GO:0050658	RNA transport	72	6	2.44	0.03505
Cycling B cells	GO:0032986	protein-DNA complex disassembly	9	2	0.31	0.03531
Cycling B cells	GO:0006337	nucleosome disassembly	9	2	0.31	0.03531
Cycling B cells	GO:0051095	regulation of helicase activity	9	2	0.31	0.03531
Cycling B cells	GO:2000104	negative regulation of DNA-dependent DNA replication	9	2	0.31	0.03531
Cycling B cells	GO:0009200	deoxyribonucleoside triphosphate metabolic process	9	2	0.31	0.03531
Cycling B cells	GO:0042776	mitochondrial ATP synthesis coupled proton transport	9	2	0.31	0.03531
Cycling B cells	GO:0032785	negative regulation of DNA-templated transcription, elongation	9	2	0.31	0.03531
Cycling B cells	GO:0043486	histone exchange	9	2	0.31	0.03531
Cycling B cells	GO:0009070	serine family amino acid biosynthetic process	9	2	0.31	0.03531
Cycling B cells	GO:1901857	positive regulation of cellular respiration	9	2	0.31	0.03531
Cycling B cells	GO:0072594	establishment of protein localization to organelle	231	19	7.84	0.03537
Cycling B cells	GO:0000910	cytokinesis	106	16	3.6	0.03569
Cycling B cells	GO:0071353	cellular response to interleukin-4	22	3	0.75	0.03701
Cycling B cells	GO:0045740	positive regulation of DNA replication	22	3	0.75	0.03701
Cycling B cells	GO:0006120	mitochondrial electron transport, NADH to ubiquinone	22	3	0.75	0.03701
Cycling B cells	GO:0071168	protein localization to chromatin	22	3	0.75	0.03701
Cycling B cells	GO:0051294	establishment of spindle orientation	22	3	0.75	0.03701
Cycling B cells	GO:1905268	negative regulation of chromatin organization	38	4	1.29	0.03886
Cycling B cells	GO:0006282	regulation of DNA repair	94	7	3.19	0.04038
Cycling B cells	GO:0051310	metaphase plate congression	50	15	1.7	0.04066
Cycling B cells	GO:0034504	protein localization to nucleus	179	11	6.07	0.04147
Cycling B cells	GO:0031297	replication fork processing	23	3	0.78	0.04152
Cycling B cells	GO:1902099	regulation of metaphase/anaphase transition of cell cycle	40	10	1.36	0.04165
Cycling B cells	GO:0000278	mitotic cell cycle	513	75	17.41	0.04203
Cycling B cells	GO:0009166	nucleotide catabolic process	39	4	1.32	0.04218
Cycling B cells	GO:0009890	negative regulation of biosynthetic process	868	39	29.46	0.04251
Cycling B cells	GO:0070213	protein auto-ADP-ribosylation	10	2	0.34	0.04316
Cycling B cells	GO:0035372	protein localization to microtubule	10	2	0.34	0.04316
Cycling B cells	GO:0051573	negative regulation of histone H3-K9 methylation	10	2	0.34	0.04316
Cycling B cells	GO:1905168	positive regulation of double-strand break repair via homologous recombination	10	2	0.34	0.04316
Cycling B cells	GO:1901679	nucleotide transmembrane transport	10	2	0.34	0.04316
Cycling B cells	GO:0060707	trophoblast giant cell differentiation	10	2	0.34	0.04316
Cycling B cells	GO:0046653	tetrahydrofolate metabolic process	10	2	0.34	0.04316
Cycling B cells	GO:1901978	positive regulation of cell cycle checkpoint	10	2	0.34	0.04316
Cycling B cells	GO:0072530	purine-containing compound transmembrane transport	10	2	0.34	0.04316
Cycling B cells	GO:0051204	protein insertion into mitochondrial membrane	10	2	0.34	0.04316
Cycling B cells	GO:1901838	positive regulation of transcription of nucleolar large rRNA by RNA polymerase I	10	2	0.34	0.04316
Cycling B cells	GO:2000113	negative regulation of cellular macromolecule biosynthetic process	820	37	27.83	0.04503
Cycling B cells	GO:0010569	regulation of double-strand break repair via homologous recombination	40	4	1.36	0.04566
Cycling B cells	GO:1904589	regulation of protein import	40	4	1.36	0.04566
Cycling B cells	GO:0006259	DNA metabolic process	552	74	18.73	0.04575
Cycling B cells	GO:0009154	purine ribonucleotide catabolic process	24	3	0.81	0.04629
Cycling B cells	GO:0006471	protein ADP-ribosylation	24	3	0.81	0.04629
Cycling B cells	GO:0070670	response to interleukin-4	24	3	0.81	0.04629
Cycling B cells	GO:0051445	regulation of meiotic cell cycle	24	3	0.81	0.04629
Cycling B cells	GO:0000731	DNA synthesis involved in DNA repair	24	3	0.81	0.04629
Cycling B cells	GO:0045069	regulation of viral genome replication	58	5	1.97	0.0463
Cycling B cells	GO:0070507	regulation of microtubule cytoskeleton organization	148	12	5.02	0.04689
Cycling B cells	GO:0009117	nucleotide metabolic process	269	22	9.13	0.04705
Cycling B cells	GO:0006839	mitochondrial transport	118	8	4	0.04735
Cycling B cells	GO:0007163	establishment or maintenance of cell polarity	118	8	4	0.04735
Cycling B cells	GO:0046034	ATP metabolic process	158	17	5.36	0.04831
Cycling B cells	GO:0009165	nucleotide biosynthetic process	131	16	4.45	0.04837
Cycling B cells	GO:2001020	regulation of response to DNA damage stimulus	162	10	5.5	0.04919
Cycling B cells	GO:0010558	negative regulation of macromolecule biosynthetic process	827	37	28.06	0.04997
Activated B cells	GO:0034314	Arp2/3 complex-mediated actin nucleation	24	3	0.17	0.00065
Activated B cells	GO:0060770	negative regulation of epithelial cell proliferation involved in prostate gland development	6	2	0.04	0.00075
Activated B cells	GO:0002314	germinal center B cell differentiation	6	2	0.04	0.00075
Activated B cells	GO:0002357	defense response to tumor cell	8	2	0.06	0.00139
Activated B cells	GO:0043299	leukocyte degranulation	33	3	0.24	0.00168
Activated B cells	GO:0071901	negative regulation of protein serine/threonine kinase activity	72	4	0.52	0.00176
Activated B cells	GO:0030595	leukocyte chemotaxis	126	5	0.91	0.0021
Activated B cells	GO:0045646	regulation of erythrocyte differentiation	36	3	0.26	0.00216
Activated B cells	GO:0031645	negative regulation of nervous system process	10	2	0.07	0.00222
Activated B cells	GO:0002685	regulation of leukocyte migration	129	5	0.93	0.00233
Activated B cells	GO:0002684	positive regulation of immune system process	518	12	3.73	0.00259
Activated B cells	GO:0030889	negative regulation of B cell proliferation	12	2	0.09	0.00322
Activated B cells	GO:0045662	negative regulation of myoblast differentiation	14	2	0.1	0.0044
Activated B cells	GO:0043484	regulation of RNA splicing	94	4	0.68	0.00464
Activated B cells	GO:0002709	regulation of T cell mediated immunity	48	3	0.35	0.00492
Activated B cells	GO:0001783	B cell apoptotic process	15	2	0.11	0.00505
Activated B cells	GO:0050855	regulation of B cell receptor signaling pathway	15	2	0.11	0.00505
Activated B cells	GO:0042129	regulation of T cell proliferation	99	4	0.71	0.00558
Activated B cells	GO:1900745	positive regulation of p38MAPK cascade	16	2	0.12	0.00575
Activated B cells	GO:0008625	extrinsic apoptotic signaling pathway via death domain receptors	52	3	0.37	0.00615
Activated B cells	GO:0007040	lysosome organization	52	3	0.37	0.00615
Activated B cells	GO:0051125	regulation of actin nucleation	17	2	0.12	0.00649
Activated B cells	GO:0019882	antigen processing and presentation	56	3	0.4	0.00756
Activated B cells	GO:0022408	negative regulation of cell-cell adhesion	110	4	0.79	0.00806
Activated B cells	GO:0043065	positive regulation of apoptotic process	332	7	2.39	0.00976
Activated B cells	GO:0050714	positive regulation of protein secretion	63	3	0.45	0.01045
Activated B cells	GO:0050870	positive regulation of T cell activation	119	4	0.86	0.01056
Activated B cells	GO:0006366	transcription by RNA polymerase II	1206	16	8.68	0.01089
Activated B cells	GO:0007605	sensory perception of sound	65	3	0.47	0.01138
Activated B cells	GO:0043300	regulation of leukocyte degranulation	23	2	0.17	0.01173
Activated B cells	GO:1903037	regulation of leukocyte cell-cell adhesion	190	5	1.37	0.01182
Activated B cells	GO:0006955	immune response	739	17	5.32	0.012
Activated B cells	GO:0045944	positive regulation of transcription by RNA polymerase II	714	11	5.14	0.0128
Activated B cells	GO:0050853	B cell receptor signaling pathway	41	4	0.3	0.01418
Activated B cells	GO:1903039	positive regulation of leukocyte cell-cell adhesion	131	4	0.94	0.01461
Activated B cells	GO:0071470	cellular response to osmotic stress	26	2	0.19	0.01486
Activated B cells	GO:0002793	positive regulation of peptide secretion	73	3	0.53	0.01555
Activated B cells	GO:0032784	regulation of DNA-templated transcription, elongation	27	2	0.19	0.01598
Activated B cells	GO:0050954	sensory perception of mechanical stimulus	74	3	0.53	0.01613
Activated B cells	GO:0006357	regulation of transcription by RNA polymerase II	1154	15	8.31	0.01637
Activated B cells	GO:0006412	translation	459	8	3.3	0.01705
Activated B cells	GO:0002704	negative regulation of leukocyte mediated immunity	28	2	0.2	0.01713
Activated B cells	GO:0097028	dendritic cell differentiation	28	2	0.2	0.01713
Activated B cells	GO:0002688	regulation of leukocyte chemotaxis	76	3	0.55	0.01731
Activated B cells	GO:0022407	regulation of cell-cell adhesion	255	8	1.84	0.01772
Activated B cells	GO:0002687	positive regulation of leukocyte migration	77	3	0.55	0.01792
Activated B cells	GO:0006368	transcription elongation from RNA polymerase II promoter	29	2	0.21	0.01831
Activated B cells	GO:0001906	cell killing	79	3	0.57	0.01918
Activated B cells	GO:0002443	leukocyte mediated immunity	196	7	1.41	0.01946
Activated B cells	GO:0032024	positive regulation of insulin secretion	30	2	0.22	0.01953
Activated B cells	GO:0007159	leukocyte cell-cell adhesion	216	5	1.55	0.01957
Activated B cells	GO:0043043	peptide biosynthetic process	475	8	3.42	0.02051
Activated B cells	GO:0002886	regulation of myeloid leukocyte mediated immunity	31	2	0.22	0.02078
Activated B cells	GO:0070665	positive regulation of leukocyte proliferation	83	3	0.6	0.02184
Activated B cells	GO:0043502	regulation of muscle adaptation	32	2	0.23	0.02207
Activated B cells	GO:0002067	glandular epithelial cell differentiation	32	2	0.23	0.02207
Activated B cells	GO:0033628	regulation of cell adhesion mediated by integrin	33	2	0.24	0.02338
Activated B cells	GO:0051254	positive regulation of RNA metabolic process	994	13	7.16	0.02426
Activated B cells	GO:0022409	positive regulation of cell-cell adhesion	153	4	1.1	0.02434
Activated B cells	GO:0071260	cellular response to mechanical stimulus	34	2	0.24	0.02473
Activated B cells	GO:0090559	regulation of membrane permeability	34	2	0.24	0.02473
Activated B cells	GO:0050851	antigen receptor-mediated signaling pathway	106	5	0.76	0.026
Activated B cells	GO:0010950	positive regulation of endopeptidase activity	92	3	0.66	0.02851
Activated B cells	GO:0048477	oogenesis	37	2	0.27	0.02895
Activated B cells	GO:0031343	positive regulation of cell killing	37	2	0.27	0.02895
Activated B cells	GO:0031663	lipopolysaccharide-mediated signaling pathway	38	2	0.27	0.03042
Activated B cells	GO:0042130	negative regulation of T cell proliferation	38	2	0.27	0.03042
Activated B cells	GO:1902904	negative regulation of supramolecular fiber organization	95	3	0.68	0.03095
Activated B cells	GO:0051494	negative regulation of cytoskeleton organization	96	3	0.69	0.03179
Activated B cells	GO:0002260	lymphocyte homeostasis	39	2	0.28	0.03192
Activated B cells	GO:0006970	response to osmotic stress	39	2	0.28	0.03192
Activated B cells	GO:0007204	positive regulation of cytosolic calcium ion concentration	97	3	0.7	0.03264
Activated B cells	GO:0071496	cellular response to external stimulus	168	4	1.21	0.03278
Activated B cells	GO:1903508	positive regulation of nucleic acid-templated transcription	929	12	6.69	0.03285
Activated B cells	GO:0045893	positive regulation of transcription, DNA-templated	929	12	6.69	0.03285
Activated B cells	GO:1902680	positive regulation of RNA biosynthetic process	930	12	6.69	0.03309
Activated B cells	GO:0010467	gene expression	3451	35	24.84	0.03325
Activated B cells	GO:0006354	DNA-templated transcription, elongation	40	2	0.29	0.03345
Activated B cells	GO:2001244	positive regulation of intrinsic apoptotic signaling pathway	40	2	0.29	0.03345
Activated B cells	GO:0043407	negative regulation of MAP kinase activity	40	2	0.29	0.03345
Activated B cells	GO:0051251	positive regulation of lymphocyte activation	170	4	1.22	0.03402
Activated B cells	GO:0010952	positive regulation of peptidase activity	99	3	0.71	0.03437
Activated B cells	GO:0006919	activation of cysteine-type endopeptidase activity involved in apoptotic process	41	2	0.3	0.035
Activated B cells	GO:0051279	regulation of release of sequestered calcium ion into cytosol	41	2	0.3	0.035
Activated B cells	GO:0007341	penetration of zona pellucida	5	1	0.04	0.03548
Activated B cells	GO:1904177	regulation of adipose tissue development	5	1	0.04	0.03548
Activated B cells	GO:0042939	tripeptide transport	5	1	0.04	0.03548
Activated B cells	GO:0060753	regulation of mast cell chemotaxis	5	1	0.04	0.03548
Activated B cells	GO:0002883	regulation of hypersensitivity	5	1	0.04	0.03548
Activated B cells	GO:0043313	regulation of neutrophil degranulation	5	1	0.04	0.03548
Activated B cells	GO:0002840	regulation of T cell mediated immune response to tumor cell	5	1	0.04	0.03548
Activated B cells	GO:0035246	peptidyl-arginine N-methylation	5	1	0.04	0.03548
Activated B cells	GO:1903142	positive regulation of establishment of endothelial barrier	5	1	0.04	0.03548
Activated B cells	GO:1901552	positive regulation of endothelial cell development	5	1	0.04	0.03548
Activated B cells	GO:0006689	ganglioside catabolic process	5	1	0.04	0.03548
Activated B cells	GO:1903299	regulation of hexokinase activity	5	1	0.04	0.03548
Activated B cells	GO:0002513	tolerance induction to self antigen	5	1	0.04	0.03548
Activated B cells	GO:0032911	negative regulation of transforming growth factor beta1 production	5	1	0.04	0.03548
Activated B cells	GO:0043615	astrocyte cell migration	5	1	0.04	0.03548
Activated B cells	GO:2000601	positive regulation of Arp2/3 complex-mediated actin nucleation	5	1	0.04	0.03548
Activated B cells	GO:0019054	modulation by virus of host cellular process	5	1	0.04	0.03548
Activated B cells	GO:0052040	modulation by symbiont of host programmed cell death	5	1	0.04	0.03548
Activated B cells	GO:0002424	T cell mediated immune response to tumor cell	5	1	0.04	0.03548
Activated B cells	GO:0034635	glutathione transport	5	1	0.04	0.03548
Activated B cells	GO:0002408	myeloid dendritic cell chemotaxis	5	1	0.04	0.03548
Activated B cells	GO:0000028	ribosomal small subunit assembly	5	1	0.04	0.03548
Activated B cells	GO:0001547	antral ovarian follicle growth	5	1	0.04	0.03548
Activated B cells	GO:0034144	negative regulation of toll-like receptor 4 signaling pathway	5	1	0.04	0.03548
Activated B cells	GO:1902218	regulation of intrinsic apoptotic signaling pathway in response to osmotic stress	5	1	0.04	0.03548
Activated B cells	GO:0071316	cellular response to nicotine	5	1	0.04	0.03548
Activated B cells	GO:0060192	negative regulation of lipase activity	5	1	0.04	0.03548
Activated B cells	GO:1902961	positive regulation of aspartic-type endopeptidase activity involved in amyloid precursor protein catabolic process	5	1	0.04	0.03548
Activated B cells	GO:0002757	immune response-activating signal transduction	118	5	0.85	0.03567
Activated B cells	GO:0002429	immune response-activating cell surface receptor signaling pathway	118	5	0.85	0.03567
Activated B cells	GO:0090277	positive regulation of peptide hormone secretion	42	2	0.3	0.03658
Activated B cells	GO:0006874	cellular calcium ion homeostasis	176	4	1.27	0.0379
Activated B cells	GO:0043500	muscle adaptation	43	2	0.31	0.03819
Activated B cells	GO:0043604	amide biosynthetic process	537	8	3.87	0.03867
Activated B cells	GO:0006974	cellular response to DNA damage stimulus	539	8	3.88	0.0394
Activated B cells	GO:2001235	positive regulation of apoptotic signaling pathway	106	3	0.76	0.04081
Activated B cells	GO:1903530	regulation of secretion by cell	263	5	1.89	0.04082
Activated B cells	GO:0002768	immune response-regulating cell surface receptor signaling pathway	124	5	0.89	0.04111
Activated B cells	GO:0055074	calcium ion homeostasis	181	4	1.3	0.04133
Activated B cells	GO:1901796	regulation of signal transduction by p53 class mediator	45	2	0.32	0.04149
Activated B cells	GO:0030858	positive regulation of epithelial cell differentiation	45	2	0.32	0.04149
Activated B cells	GO:0090398	cellular senescence	45	2	0.32	0.04149
Activated B cells	GO:0002764	immune response-regulating signaling pathway	125	5	0.9	0.04206
Activated B cells	GO:0034969	histone arginine methylation	6	1	0.04	0.04243
Activated B cells	GO:0008627	intrinsic apoptotic signaling pathway in response to osmotic stress	6	1	0.04	0.04243
Activated B cells	GO:0045793	positive regulation of cell size	6	1	0.04	0.04243
Activated B cells	GO:0031642	negative regulation of myelination	6	1	0.04	0.04243
Activated B cells	GO:1990253	cellular response to leucine starvation	6	1	0.04	0.04243
Activated B cells	GO:1902563	regulation of neutrophil activation	6	1	0.04	0.04243
Activated B cells	GO:0006568	tryptophan metabolic process	6	1	0.04	0.04243
Activated B cells	GO:0006569	tryptophan catabolic process	6	1	0.04	0.04243
Activated B cells	GO:0006586	indolalkylamine metabolic process	6	1	0.04	0.04243
Activated B cells	GO:2000344	positive regulation of acrosome reaction	6	1	0.04	0.04243
Activated B cells	GO:0009313	oligosaccharide catabolic process	6	1	0.04	0.04243
Activated B cells	GO:0007617	mating behavior	6	1	0.04	0.04243
Activated B cells	GO:0002887	negative regulation of myeloid leukocyte mediated immunity	6	1	0.04	0.04243
Activated B cells	GO:0043320	natural killer cell degranulation	6	1	0.04	0.04243
Activated B cells	GO:0046325	negative regulation of glucose import	6	1	0.04	0.04243
Activated B cells	GO:0060742	epithelial cell differentiation involved in prostate gland development	6	1	0.04	0.04243
Activated B cells	GO:0043301	negative regulation of leukocyte degranulation	6	1	0.04	0.04243
Activated B cells	GO:1904238	pericyte cell differentiation	6	1	0.04	0.04243
Activated B cells	GO:0045838	positive regulation of membrane potential	6	1	0.04	0.04243
Activated B cells	GO:0002576	platelet degranulation	6	1	0.04	0.04243
Activated B cells	GO:0090241	negative regulation of histone H4 acetylation	6	1	0.04	0.04243
Activated B cells	GO:0086103	G protein-coupled receptor signaling pathway involved in heart process	6	1	0.04	0.04243
Activated B cells	GO:0014733	regulation of skeletal muscle adaptation	6	1	0.04	0.04243
Activated B cells	GO:0002431	Fc receptor mediated stimulatory signaling pathway	6	1	0.04	0.04243
Activated B cells	GO:0060525	prostate glandular acinus development	6	1	0.04	0.04243
Activated B cells	GO:0042436	indole-containing compound catabolic process	6	1	0.04	0.04243
Activated B cells	GO:1905247	positive regulation of aspartic-type peptidase activity	6	1	0.04	0.04243
Activated B cells	GO:0010918	positive regulation of mitochondrial membrane potential	6	1	0.04	0.04243
Activated B cells	GO:0046218	indolalkylamine catabolic process	6	1	0.04	0.04243
Activated B cells	GO:0032488	Cdc42 protein signal transduction	6	1	0.04	0.04243
Activated B cells	GO:0033139	regulation of peptidyl-serine phosphorylation of STAT protein	6	1	0.04	0.04243
Activated B cells	GO:2000774	positive regulation of cellular senescence	6	1	0.04	0.04243
Activated B cells	GO:0071447	cellular response to hydroperoxide	6	1	0.04	0.04243
Activated B cells	GO:0052547	regulation of peptidase activity	183	4	1.32	0.04274
Activated B cells	GO:0097529	myeloid leukocyte migration	109	3	0.78	0.04374
Activated B cells	GO:0033627	cell adhesion mediated by integrin	47	2	0.34	0.04489
Activated B cells	GO:0051480	regulation of cytosolic calcium ion concentration	111	3	0.8	0.04576
Activated B cells	GO:0002444	myeloid leukocyte mediated immunity	48	2	0.35	0.04663
Activated B cells	GO:0002696	positive regulation of leukocyte activation	189	4	1.36	0.04716
Activated B cells	GO:0050778	positive regulation of immune response	297	7	2.14	0.04786
Activated B cells	GO:0010522	regulation of calcium ion transport into cytosol	49	2	0.35	0.04839
Activated B cells	GO:0002275	myeloid cell activation involved in immune response	49	2	0.35	0.04839
Activated B cells	GO:0031341	regulation of cell killing	49	2	0.35	0.04839
Activated B cells	GO:0051883	killing of cells in other organism involved in symbiotic interaction	7	1	0.05	0.04933
Activated B cells	GO:0032074	negative regulation of nuclease activity	7	1	0.05	0.04933
Activated B cells	GO:0045986	negative regulation of smooth muscle contraction	7	1	0.05	0.04933
Activated B cells	GO:0045989	positive regulation of striated muscle contraction	7	1	0.05	0.04933
Activated B cells	GO:0002864	regulation of acute inflammatory response to antigenic stimulus	7	1	0.05	0.04933
Activated B cells	GO:0043312	neutrophil degranulation	7	1	0.05	0.04933
Activated B cells	GO:1905516	positive regulation of fertilization	7	1	0.05	0.04933
Activated B cells	GO:2000510	positive regulation of dendritic cell chemotaxis	7	1	0.05	0.04933
Activated B cells	GO:0048102	autophagic cell death	7	1	0.05	0.04933
Activated B cells	GO:2000508	regulation of dendritic cell chemotaxis	7	1	0.05	0.04933
Activated B cells	GO:0002318	myeloid progenitor cell differentiation	7	1	0.05	0.04933
Activated B cells	GO:0002551	mast cell chemotaxis	7	1	0.05	0.04933
Activated B cells	GO:0002524	hypersensitivity	7	1	0.05	0.04933
Activated B cells	GO:0055119	relaxation of cardiac muscle	7	1	0.05	0.04933
Activated B cells	GO:1905634	regulation of protein localization to chromatin	7	1	0.05	0.04933
Activated B cells	GO:2000194	regulation of female gonad development	7	1	0.05	0.04933
Activated B cells	GO:0000185	activation of MAPKKK activity	7	1	0.05	0.04933
Activated B cells	GO:0051126	negative regulation of actin nucleation	7	1	0.05	0.04933
Activated B cells	GO:0051127	positive regulation of actin nucleation	7	1	0.05	0.04933
Activated B cells	GO:0036462	TRAIL-activated apoptotic signaling pathway	7	1	0.05	0.04933
Activated B cells	GO:0033629	negative regulation of cell adhesion mediated by integrin	7	1	0.05	0.04933
Activated B cells	GO:0033632	regulation of cell-cell adhesion mediated by integrin	7	1	0.05	0.04933
Activated B cells	GO:0016973	poly(A)+ mRNA export from nucleus	7	1	0.05	0.04933
Activated B cells	GO:0048318	axial mesoderm development	7	1	0.05	0.04933
Activated B cells	GO:1904667	negative regulation of ubiquitin protein ligase activity	7	1	0.05	0.04933
